# Supplementary material for: Genetic studies of paired metabolomes reveal enzymatic and transport processes at the interface of plasma and urine
Source: PubMed Central journal article supplement (PMC10260405; doi:10.1038/s41588-023-01409-8), 2023-06-05

### arachidonate (20:4n6)

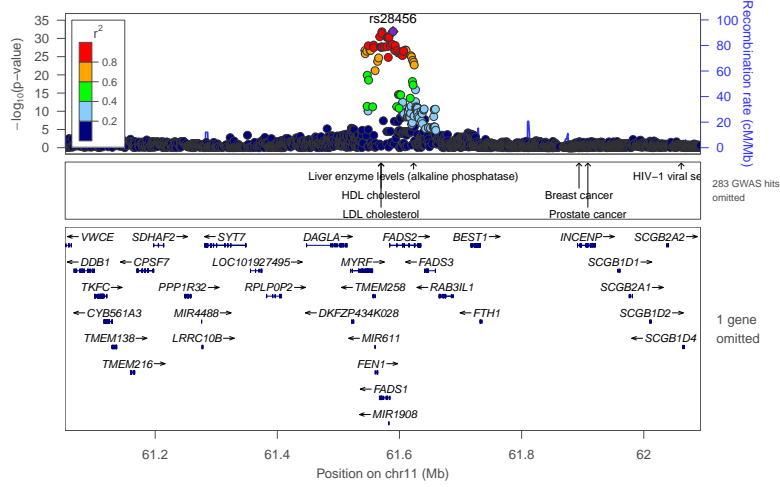

### beta-hydroxyisovalerate

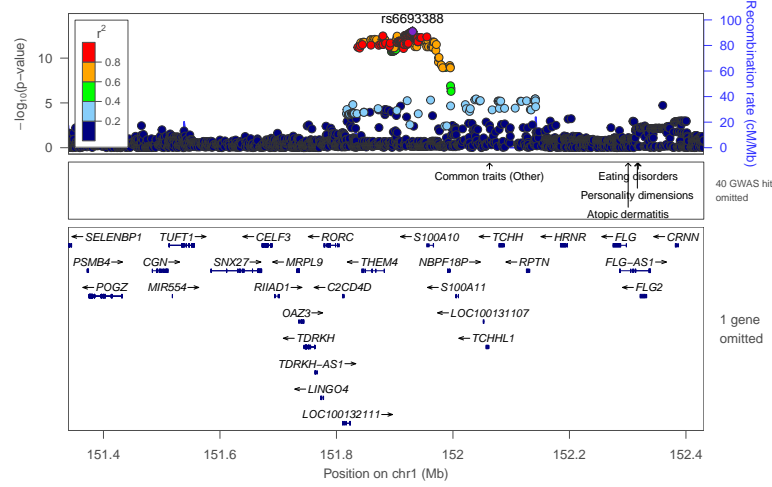

### beta-hydroxyisovalerate

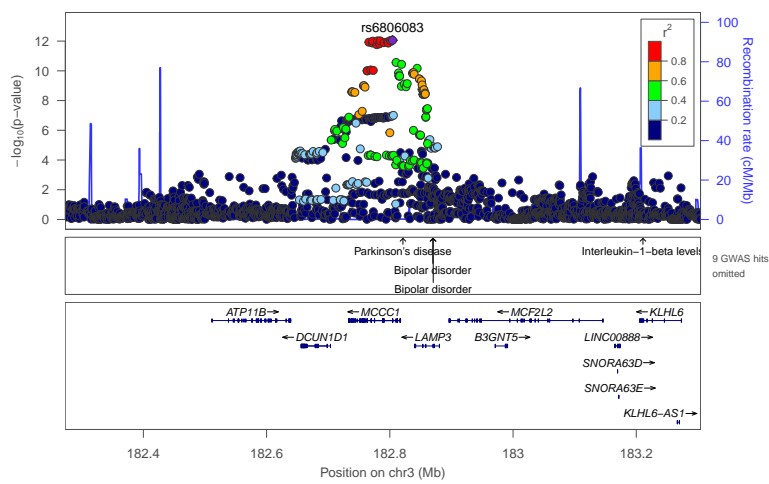

### beta-hydroxyisovalerate

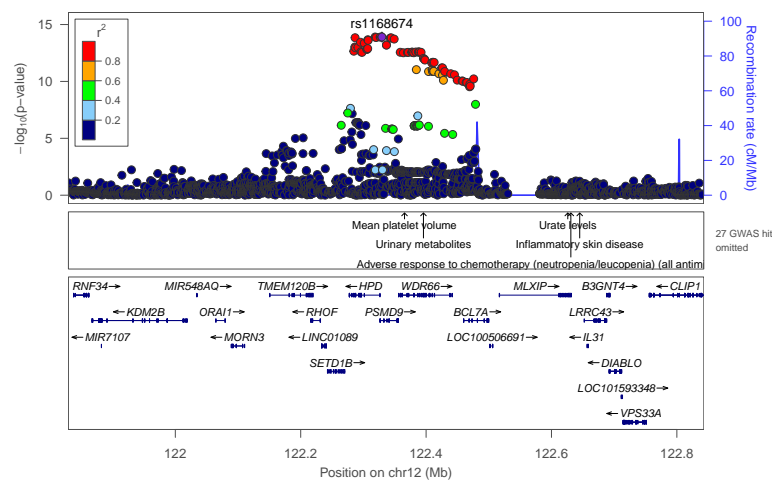

### lysine

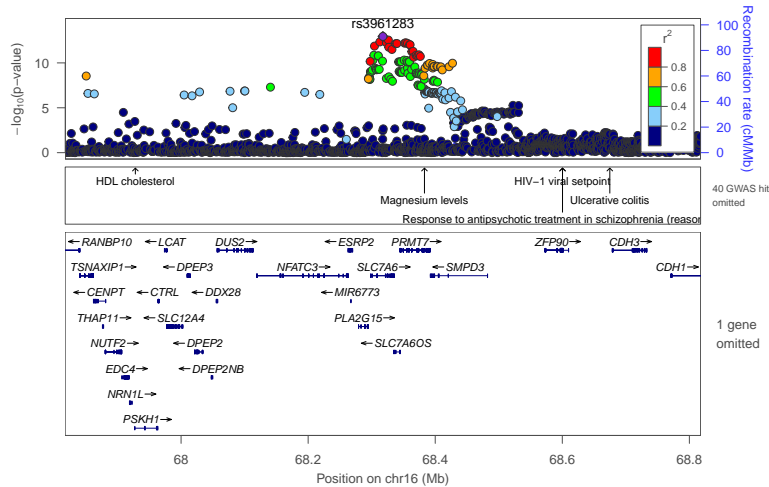

### malate

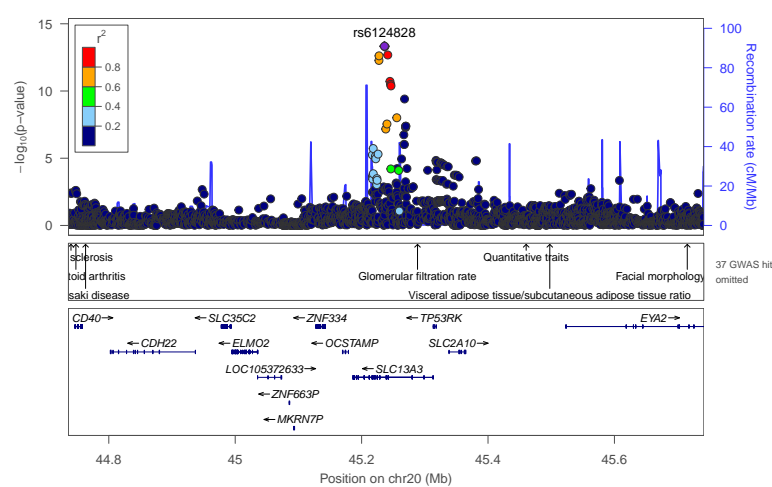

### kynurenate

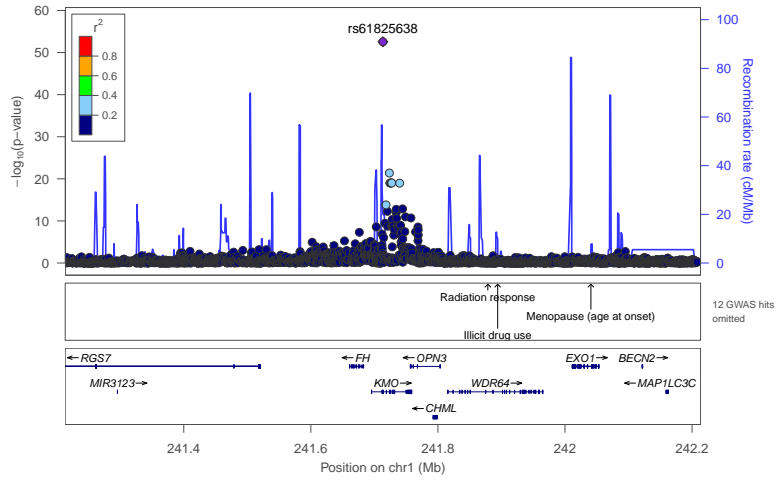

### 5-methylthioadenosine (MTA)

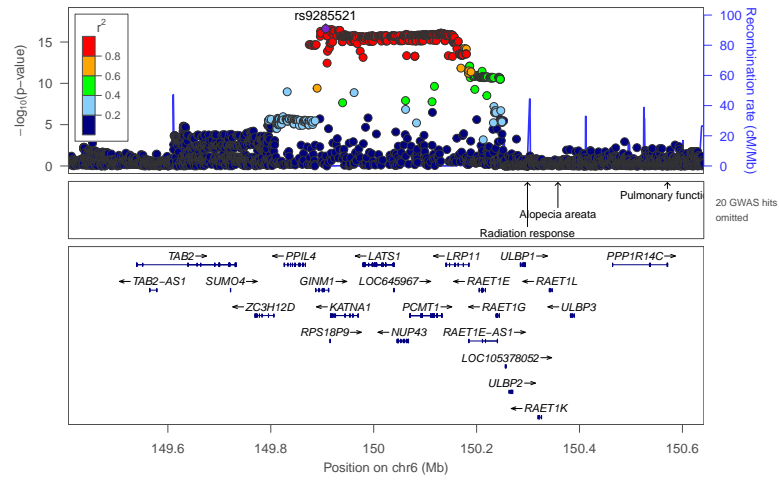

### 2-hydroxyphenylacetate

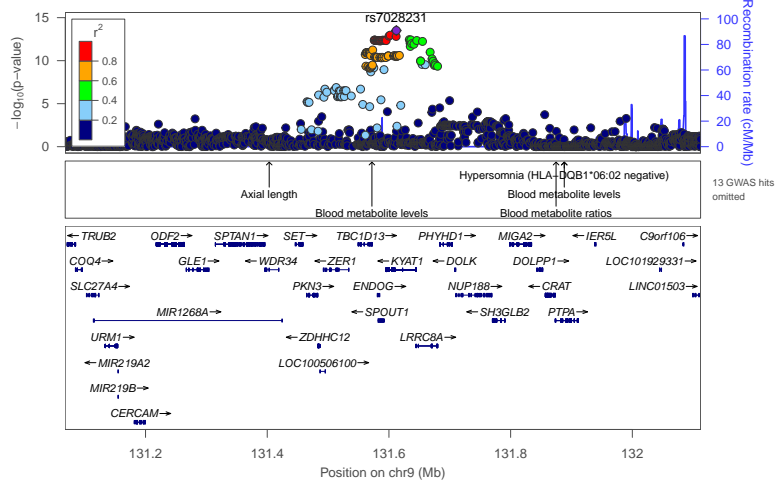

### 2-hydroxyphenylacetate

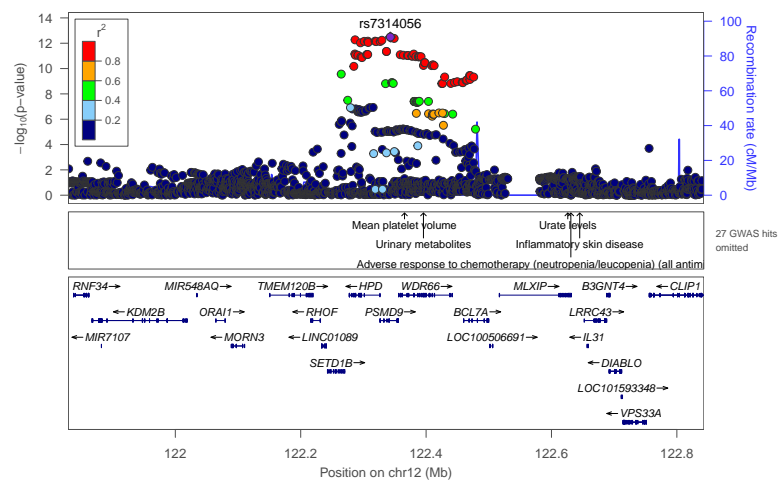

### 5-oxoproline

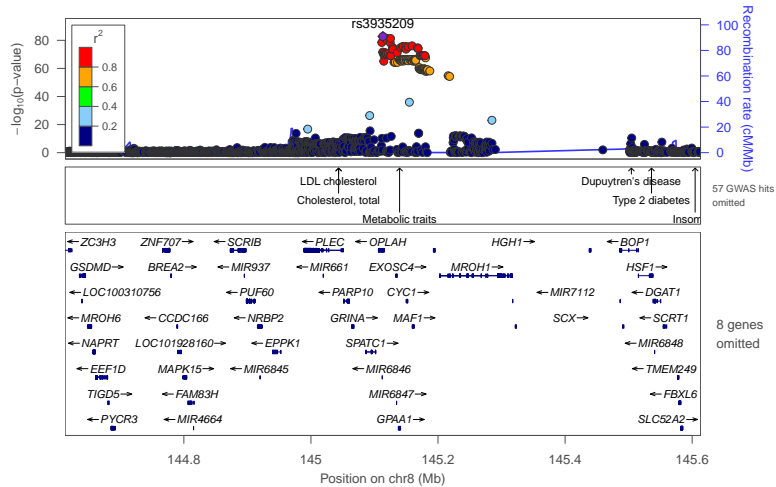

### methylmalonate (MMA)

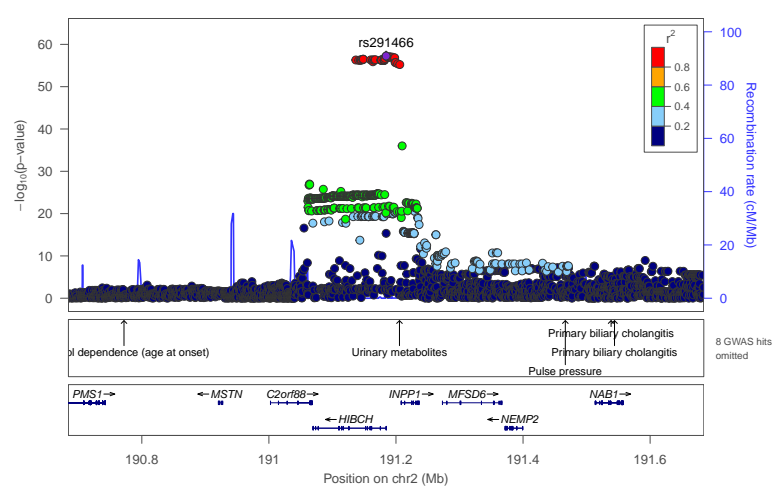

### N6,N6,N6-trimethyllysine

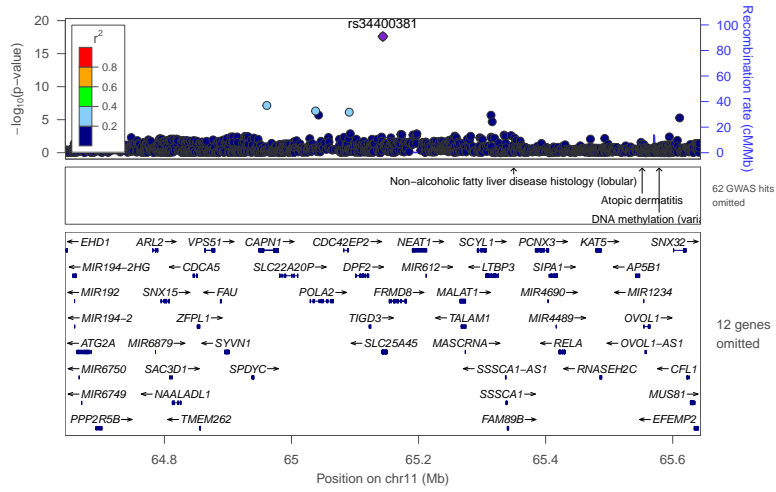

### orotate

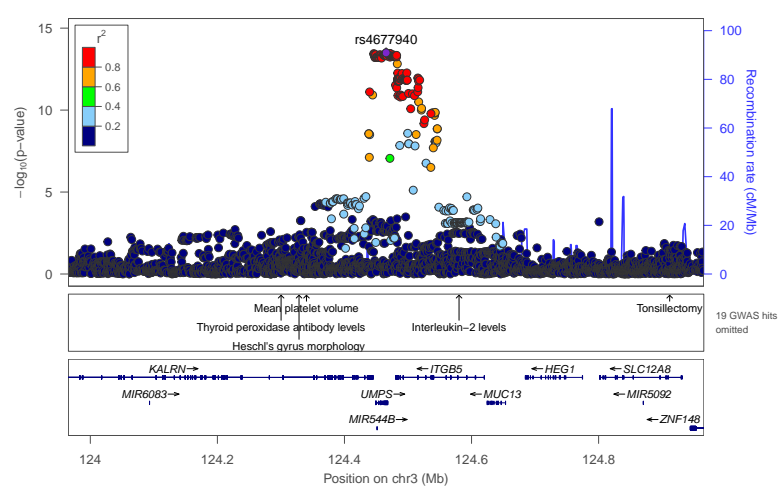

### picolinate

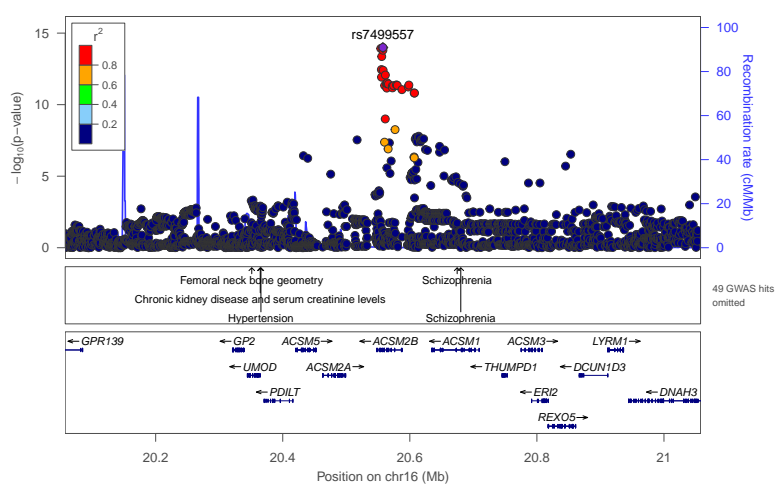

### picolinate

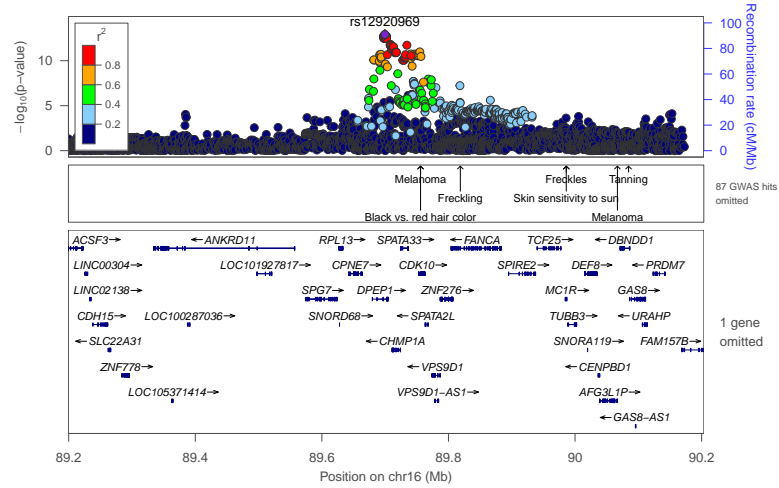

### kynurenine

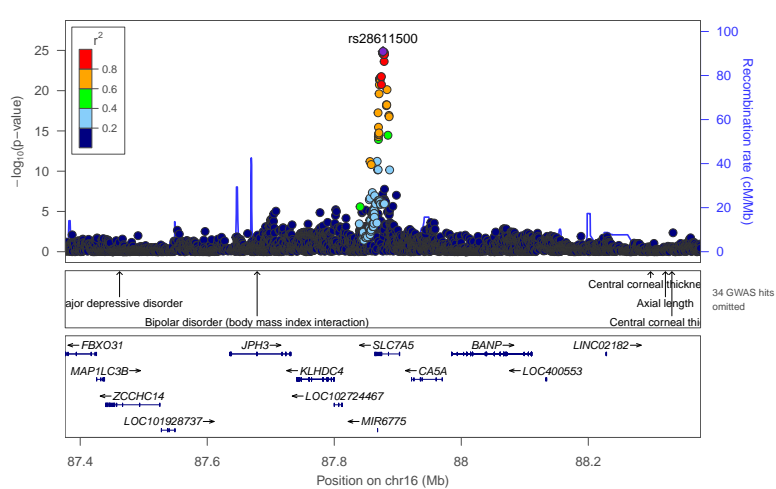

### sarcosine

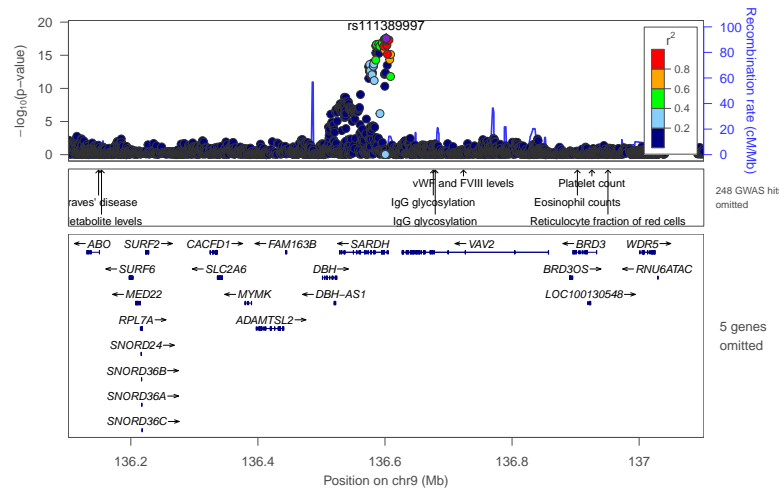

### carnitine

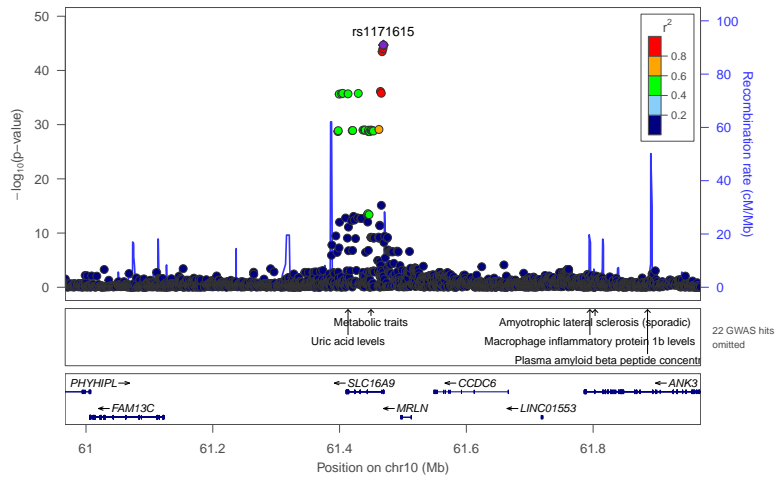

### choline

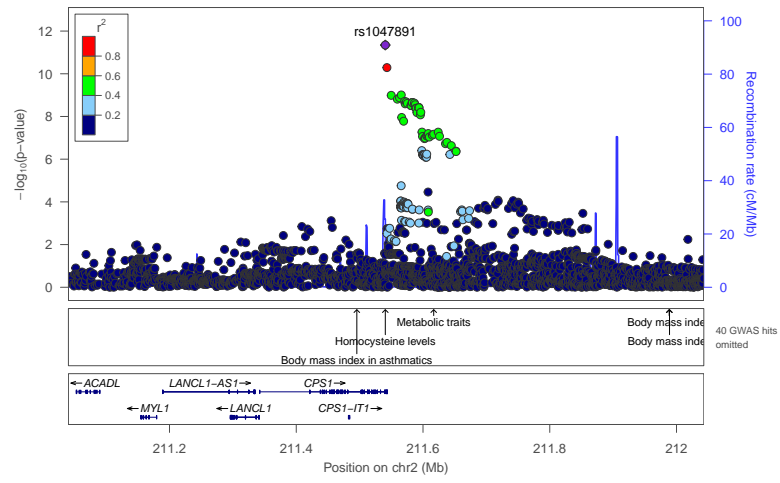

### 4-acetamidobutanoate

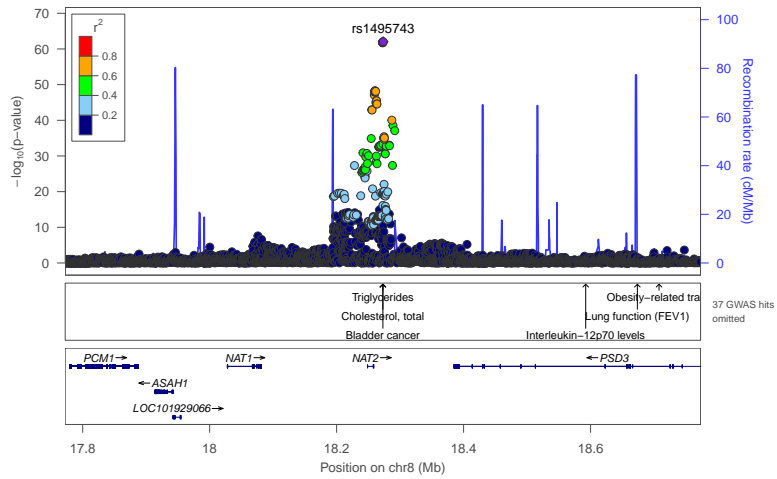

### citrate

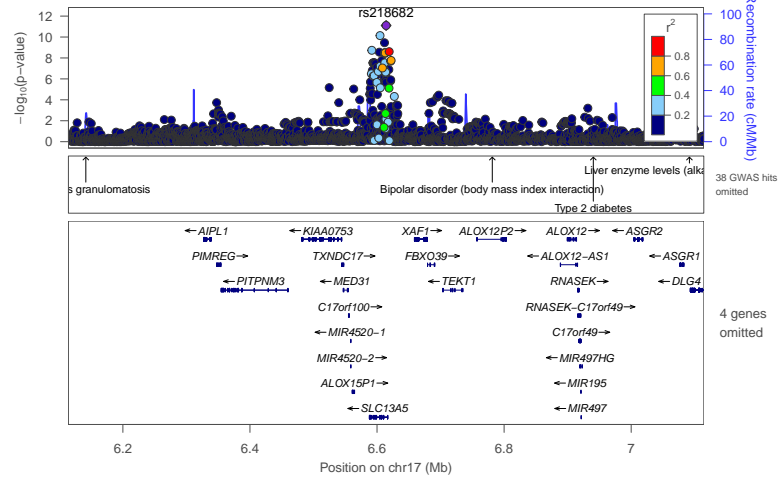

### 3-aminoisobutyrate

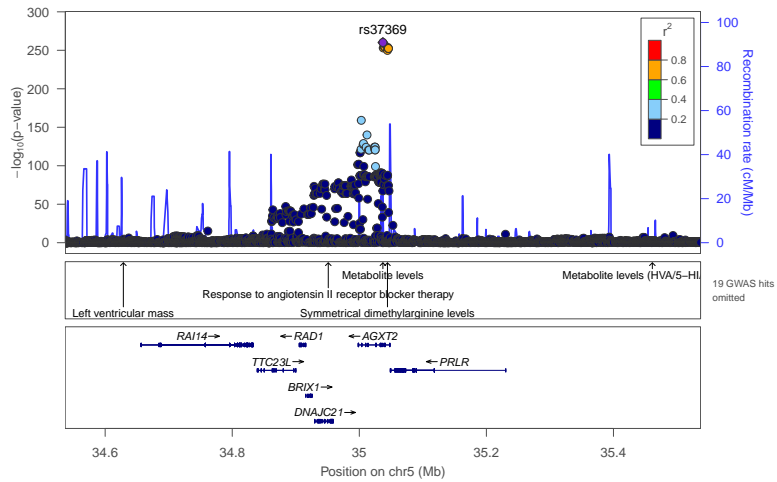

### 3-aminoisobutyrate

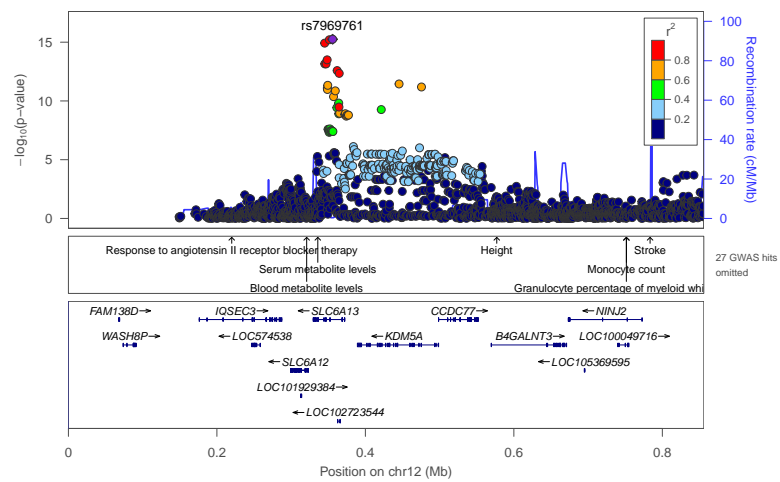



### xanthurenate

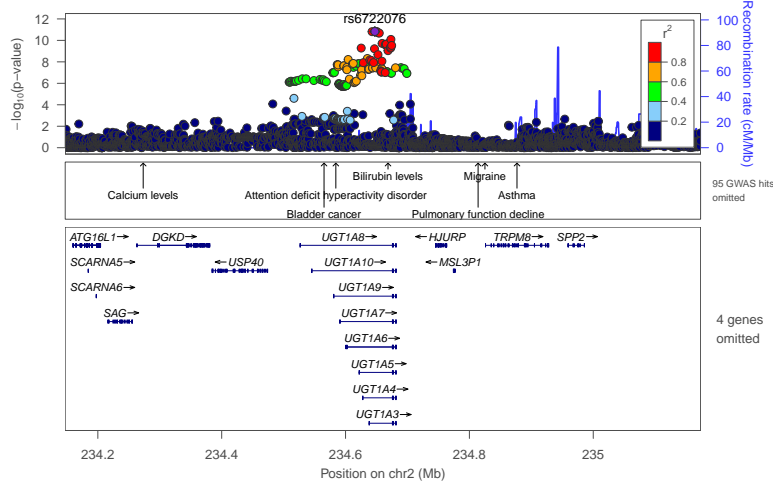

### xanthurenate

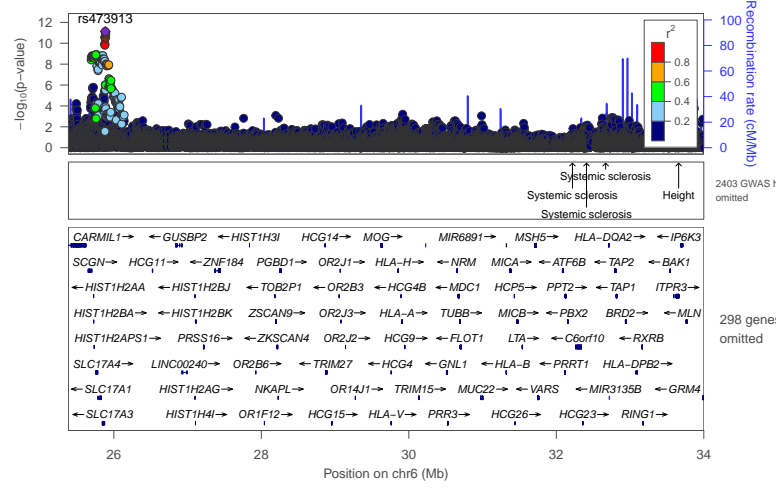

### 4-guanidinobutanoate

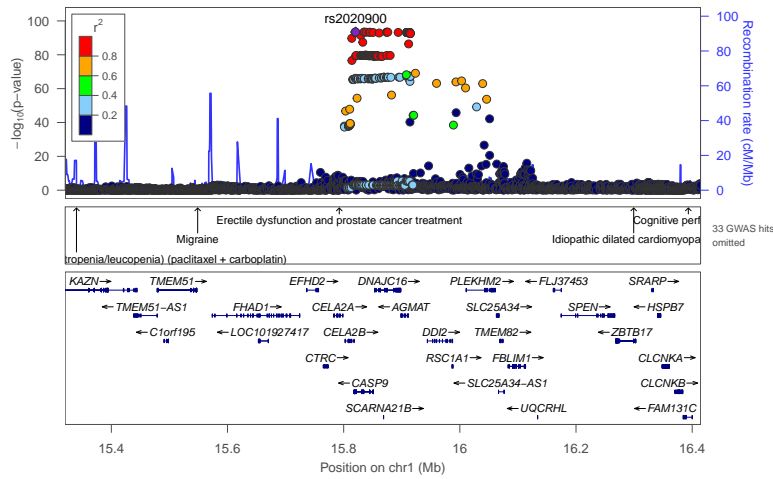

### 5-hydroxylysine

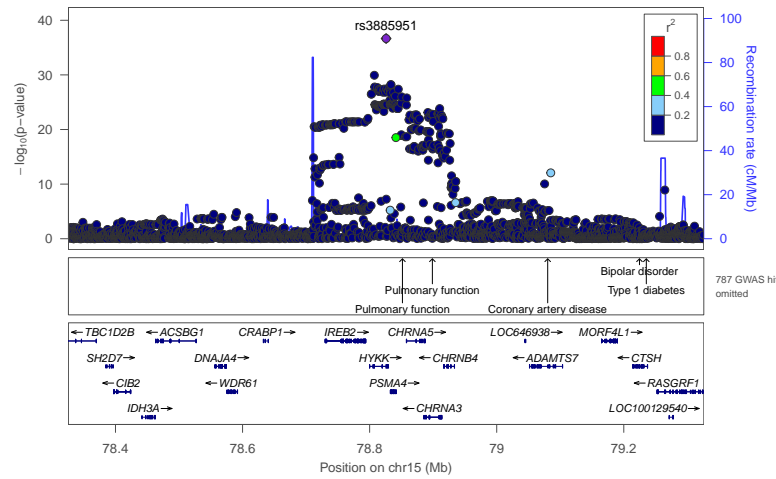

### cystathionine

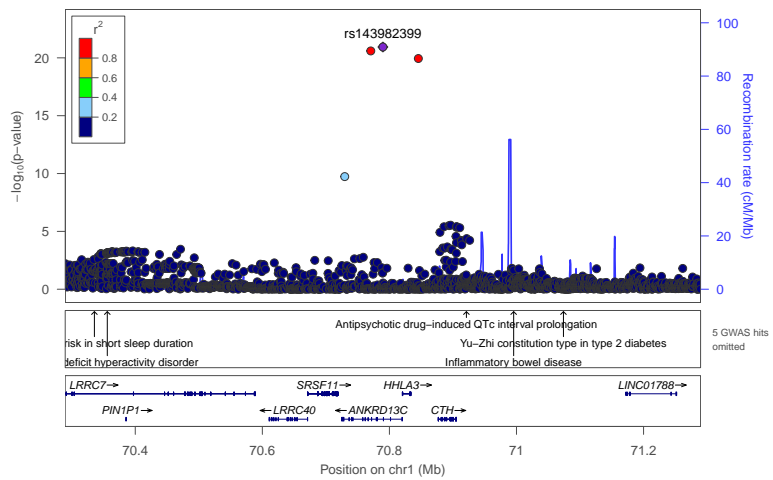

### imidazole lactate

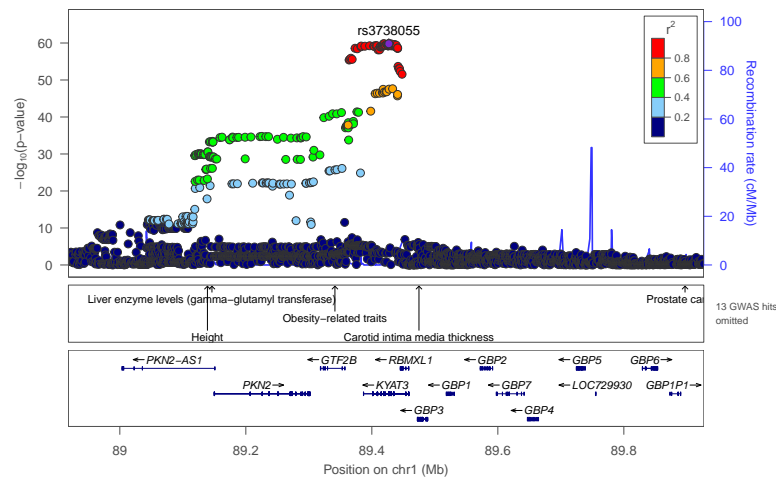

### imidazole lactate

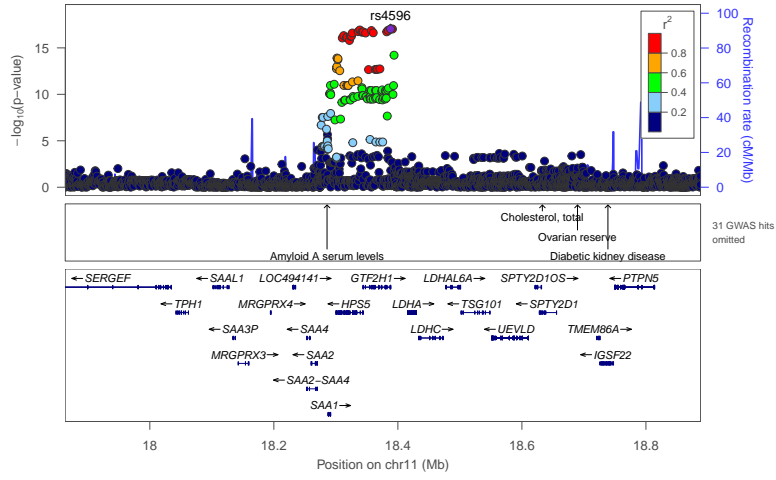

### imidazole lactate

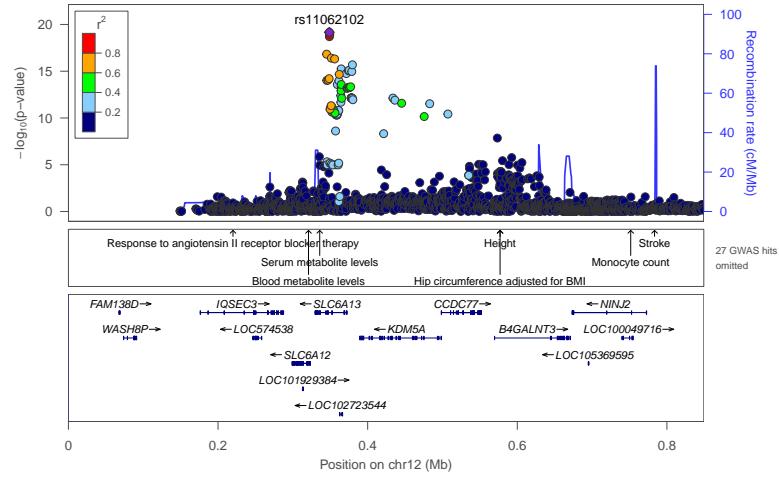

### imidazole lactate

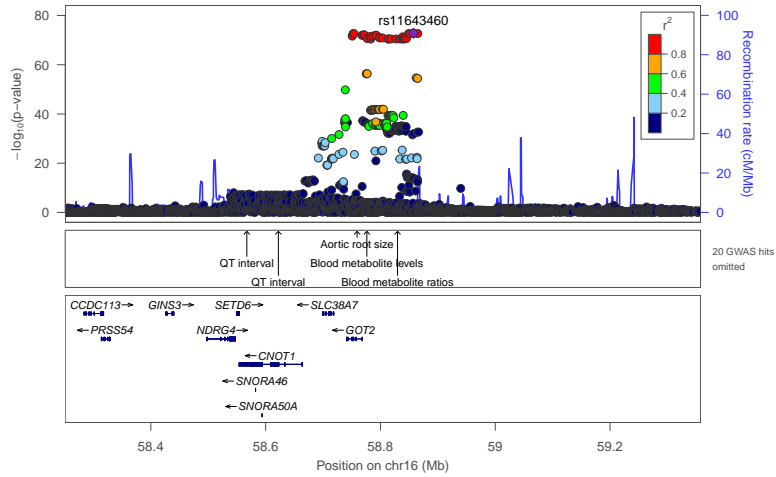

### methylsuccinate

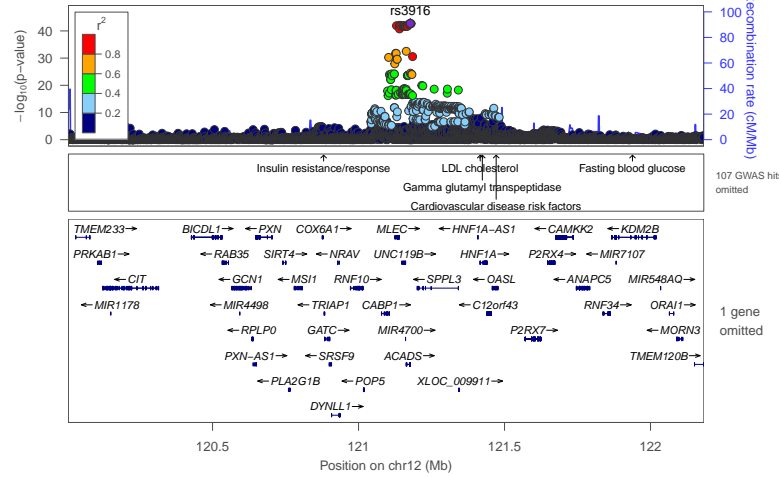

### ethylmalonate

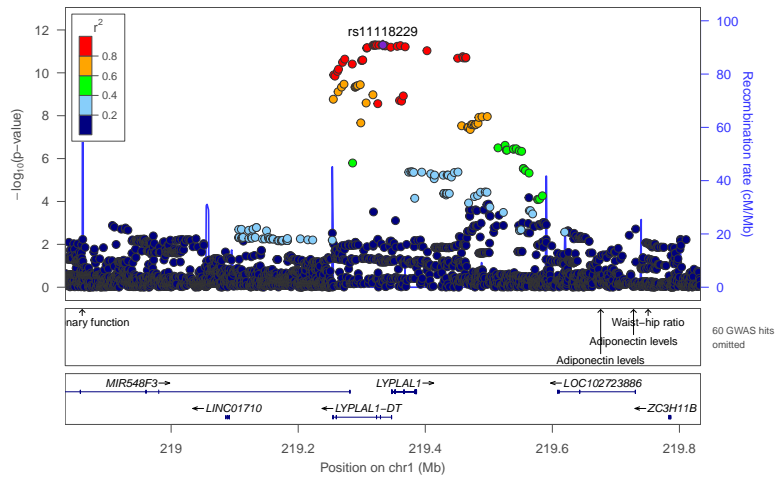

### ethylmalonate

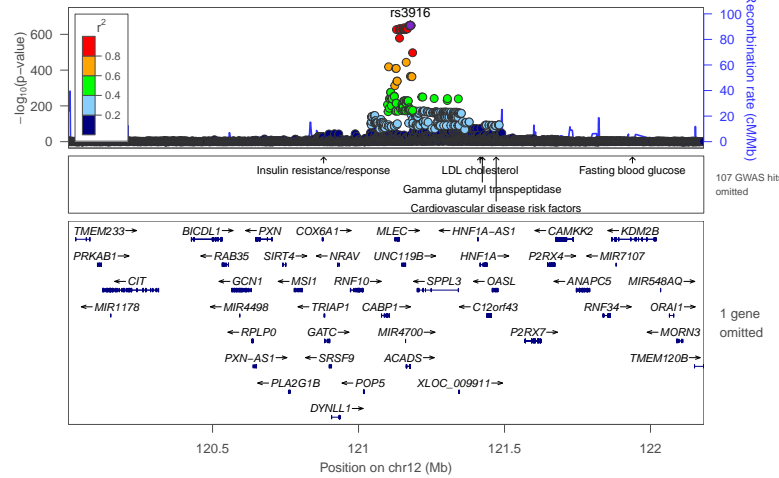

### ethylmalonate

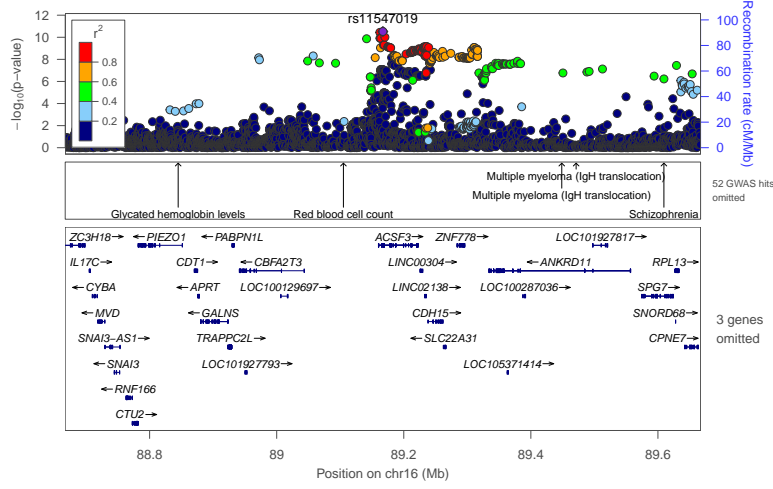

### ribitol

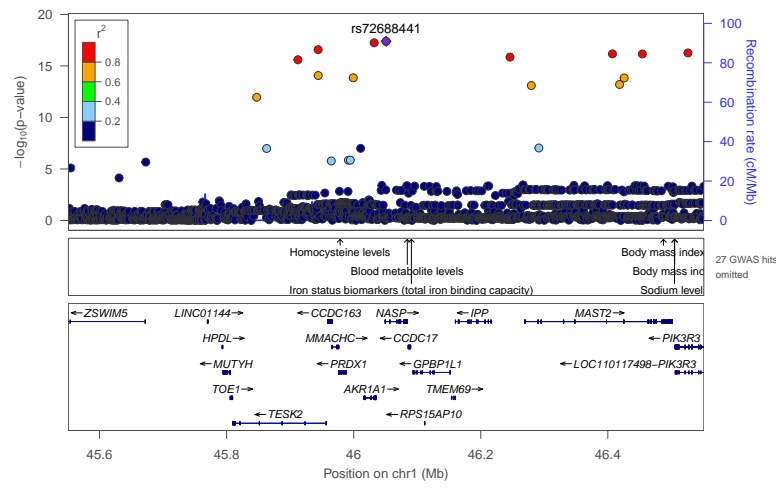

### N-acetylalanine

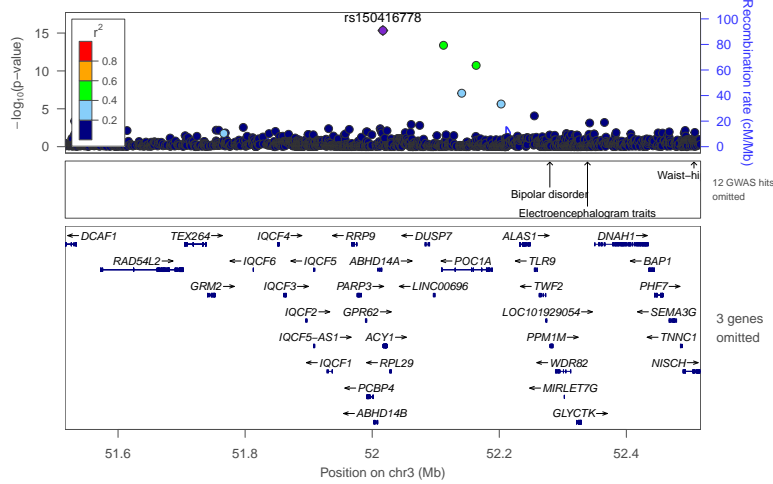

### N-acetyllecucine

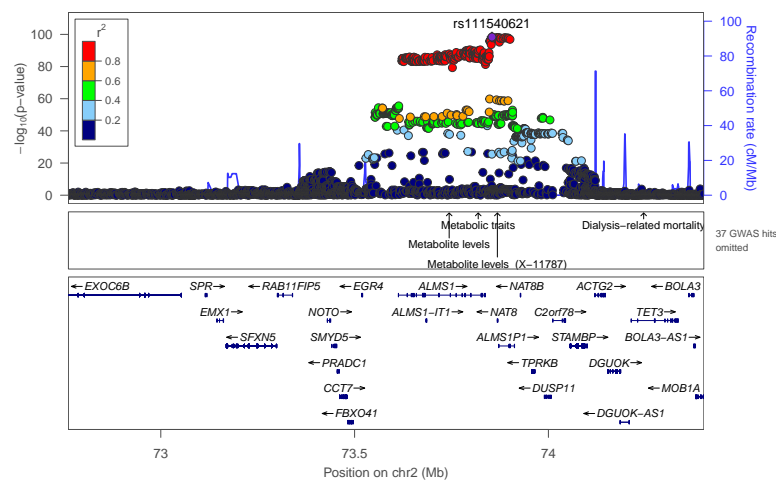

### N-acetylmethionine

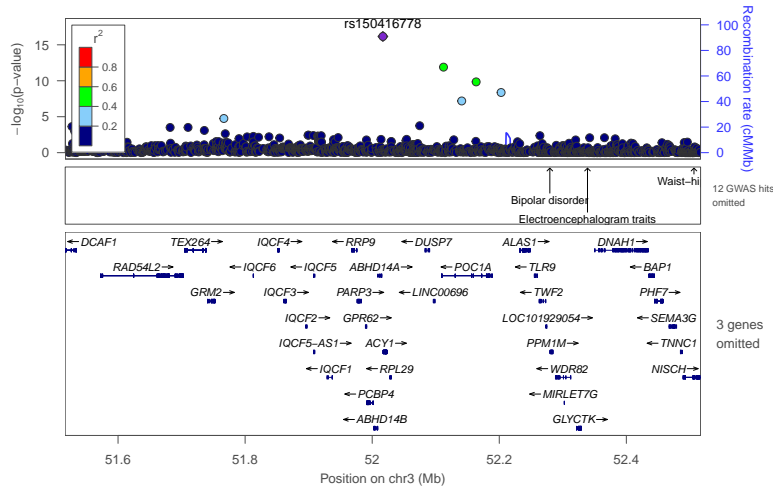

### tigloylglycine

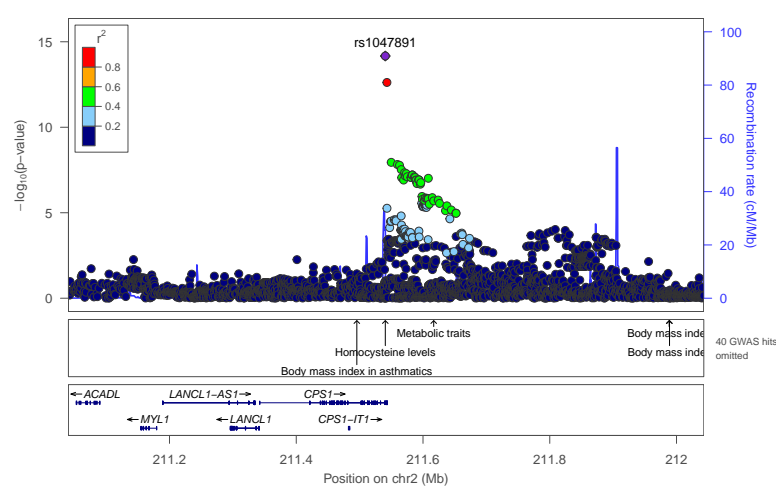

### arginine

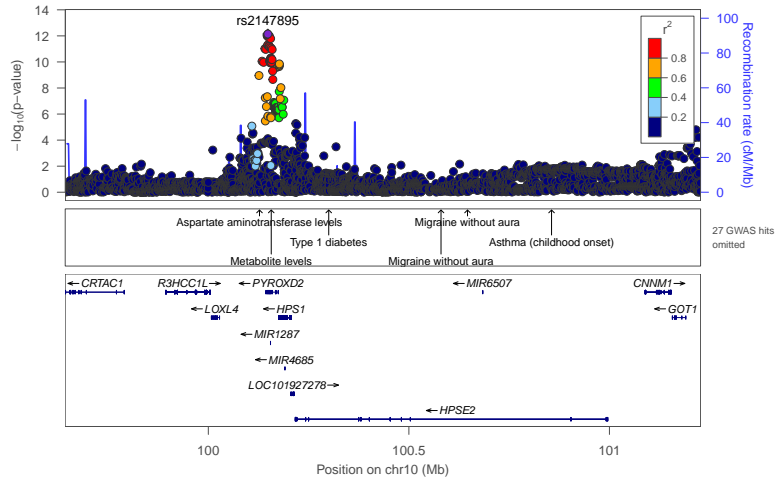

### fumarate

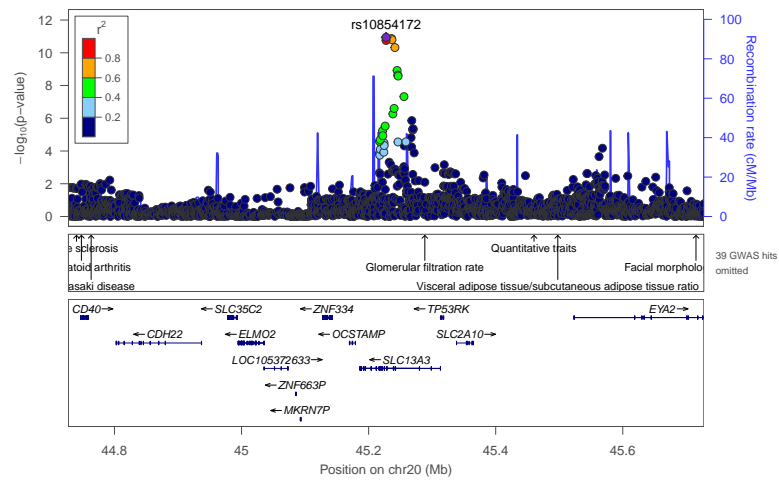

### serine

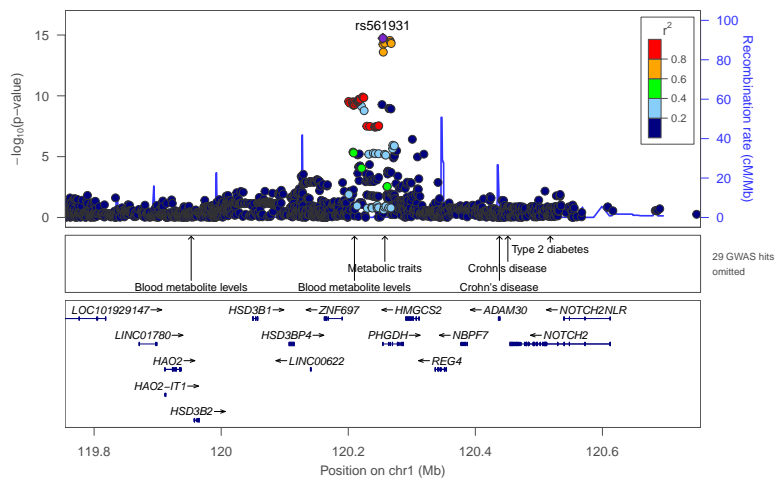

### serine

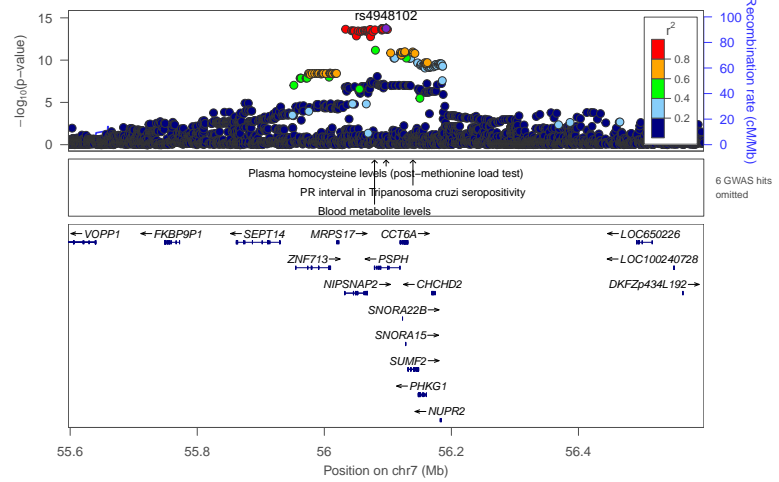

### metoprolol

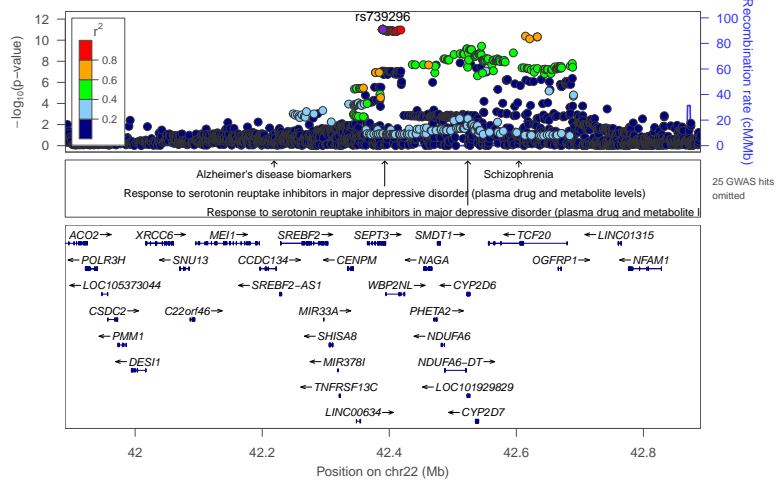

### cys-gly, oxidized

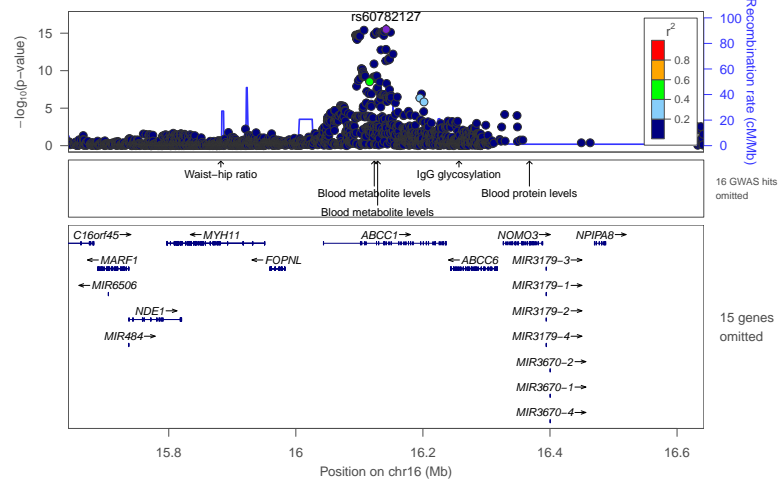

### cys-gly, oxidized

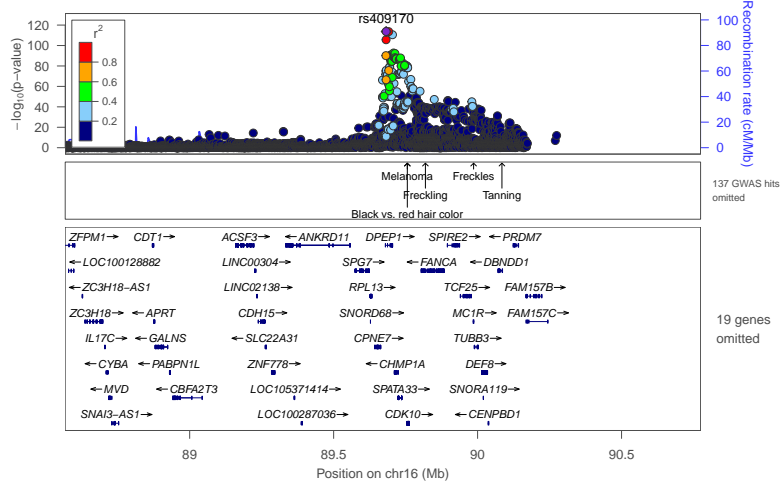

### eicosapentaenoate (EPA; 20:5n3)

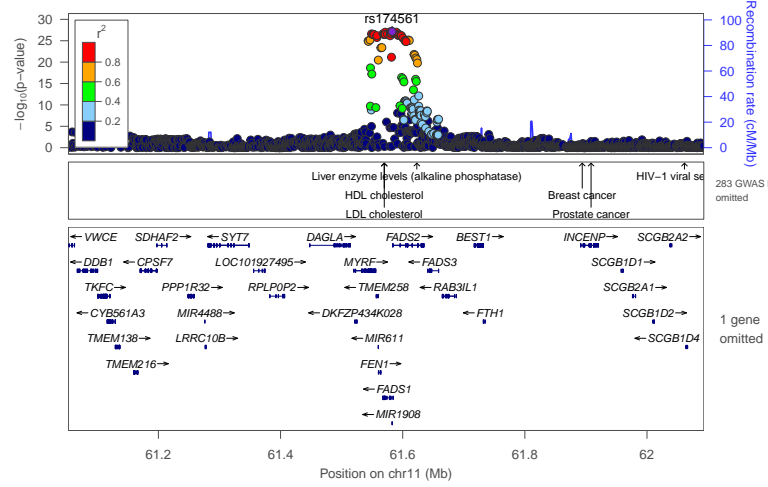

### proline

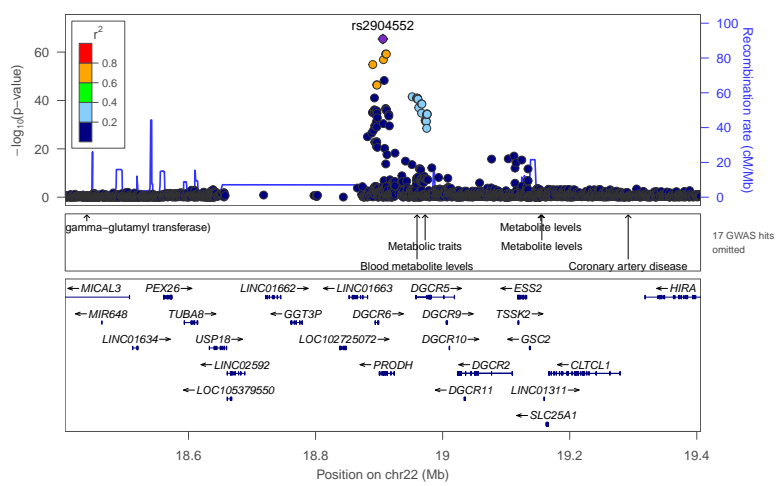

### 1,2-dipalmitoyl-GPC (16:0/16:0)

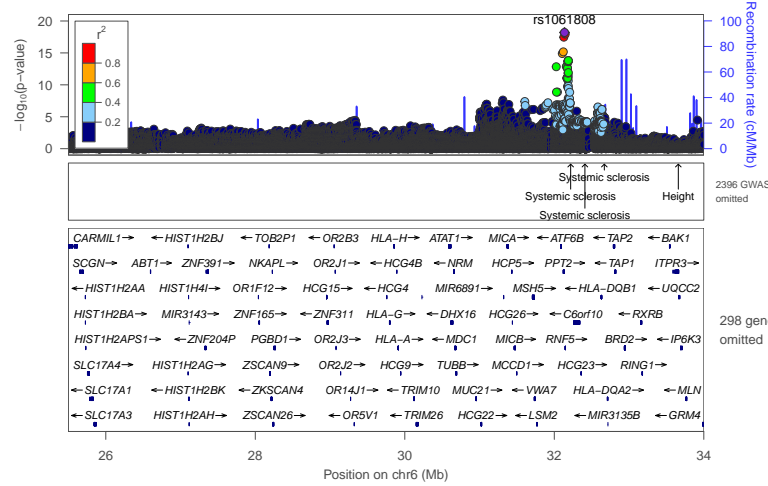

### 1,2-dipalmitoyl-GPC (16:0/16:0)

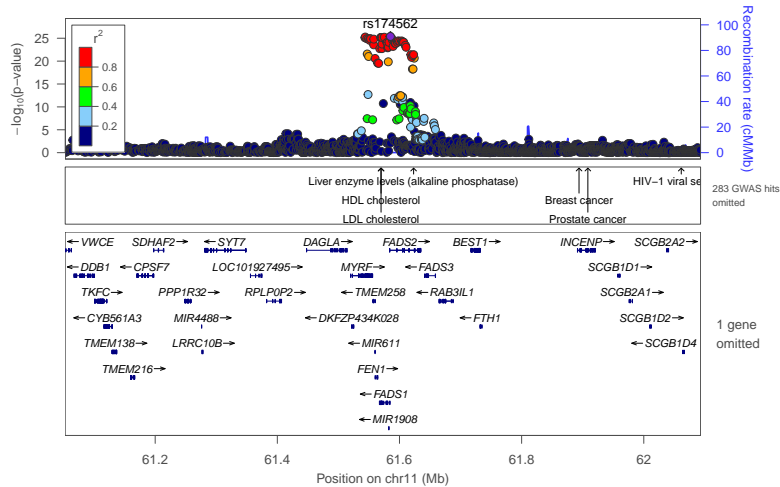

### 1-palmitoyl-2-oleoyl-GPE (16:0/18:1)

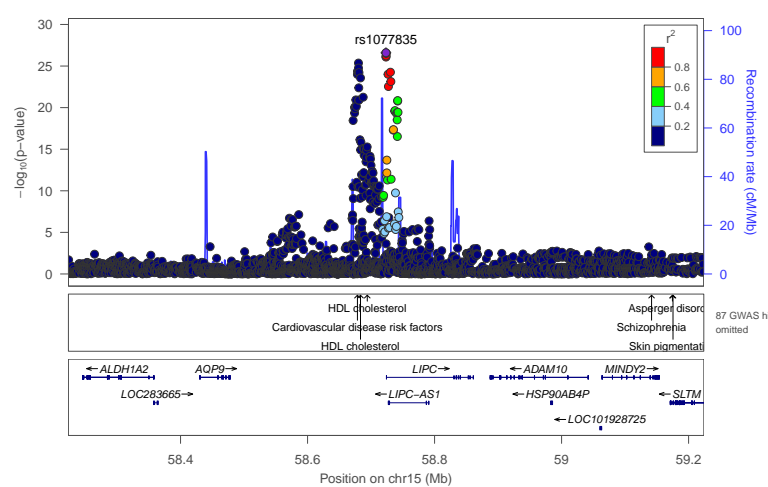

### stearoyl sphingomyelin (d18:1/18:0)

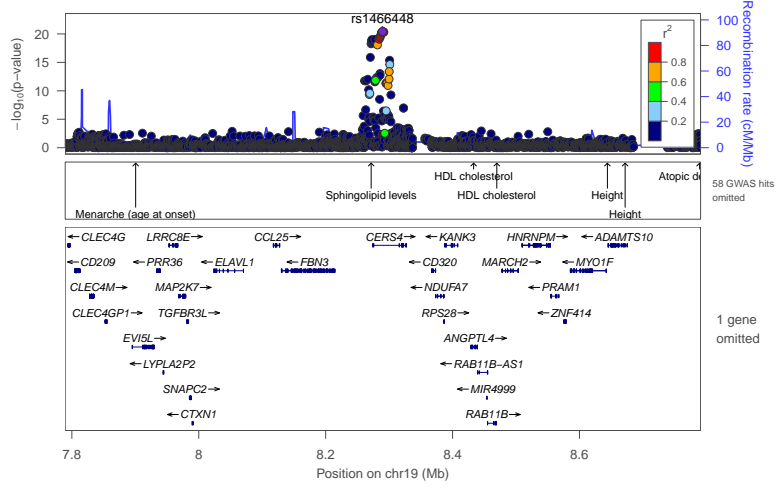

### biliverdin

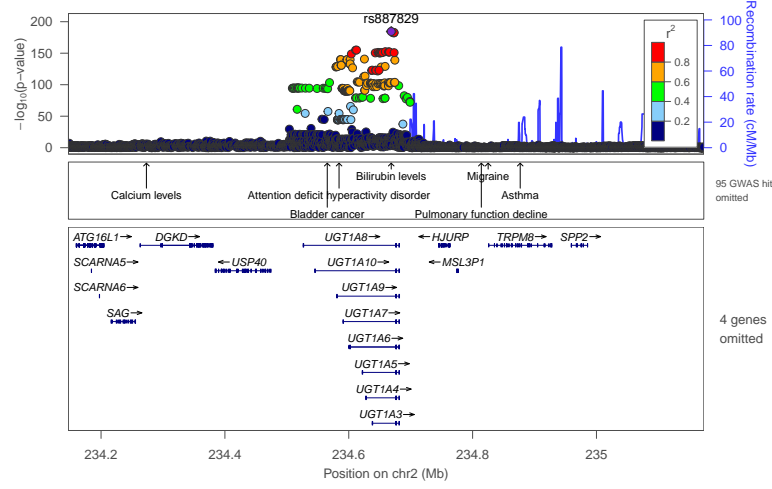

### 3-hydroxydecanoate

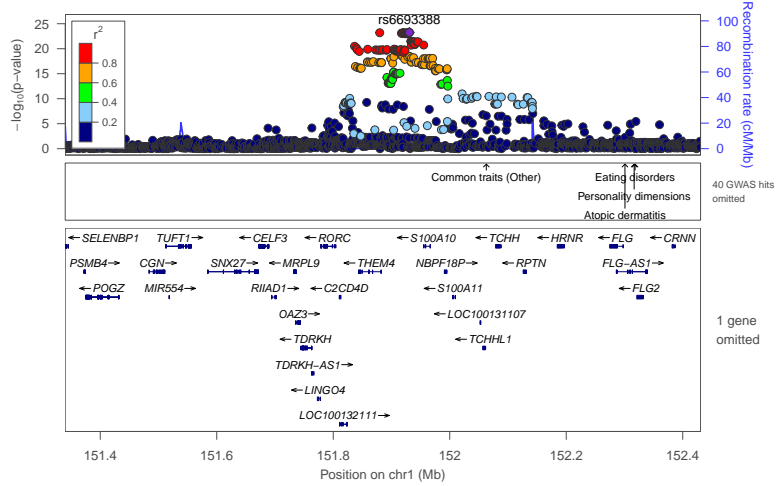

### phenyllactate (PLA)

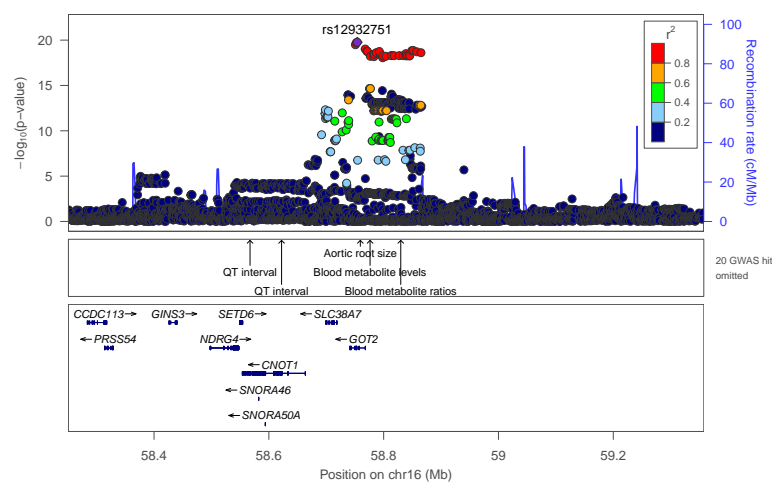

### homoarginine

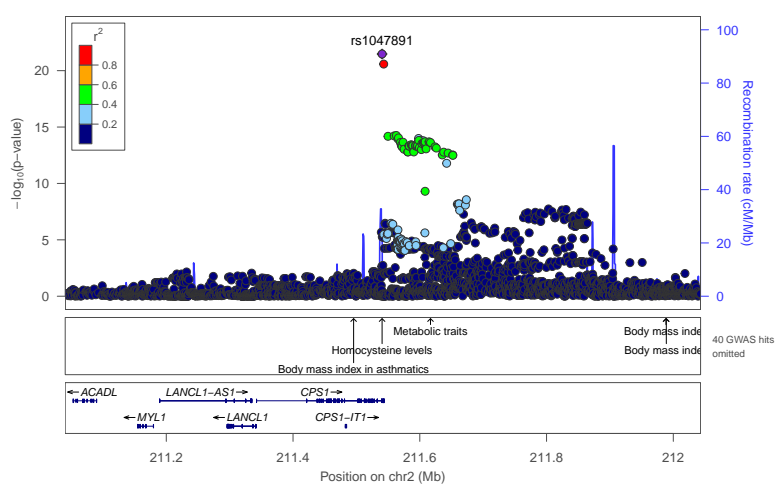

### homoarginine

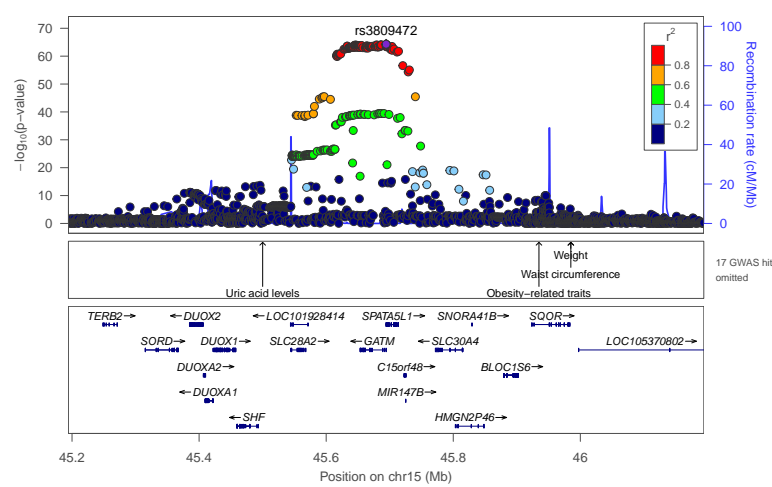



### homocitrulline

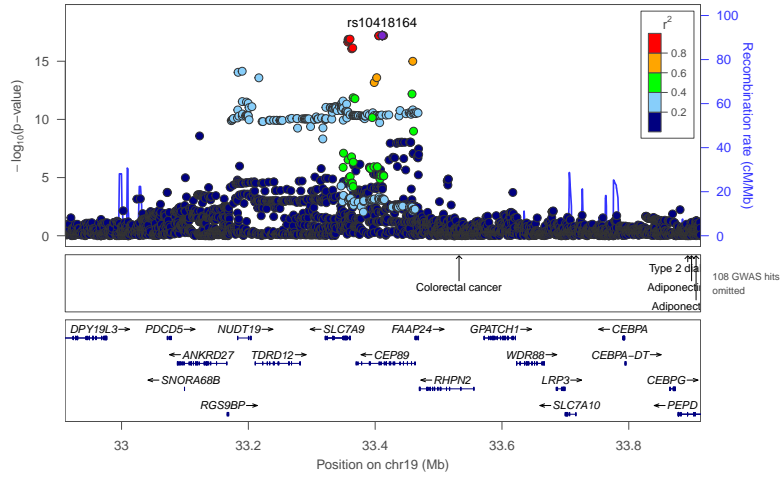

### gamma-glutamylglutamine

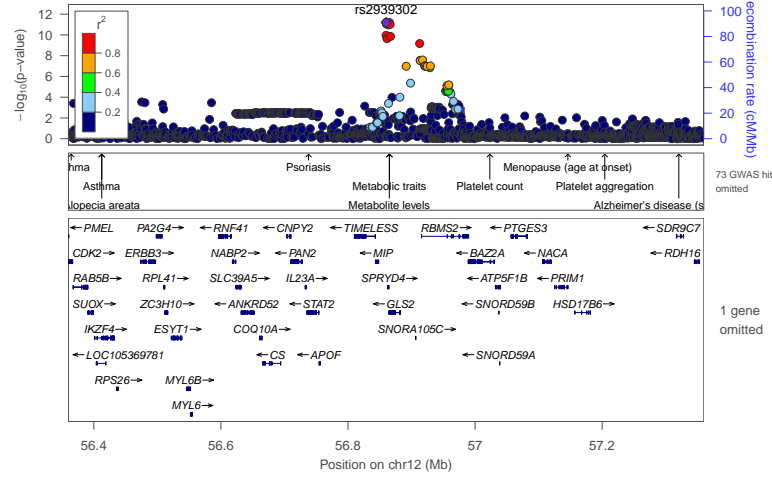

### 1-methylnicotinamide

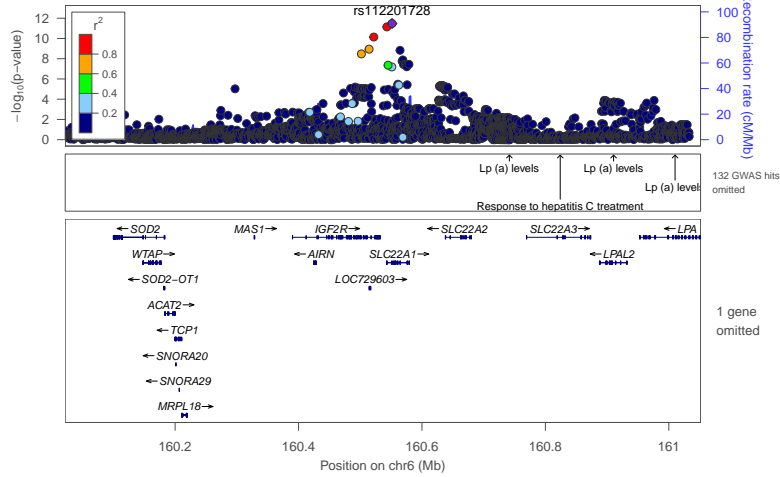

### N-acetylglycine

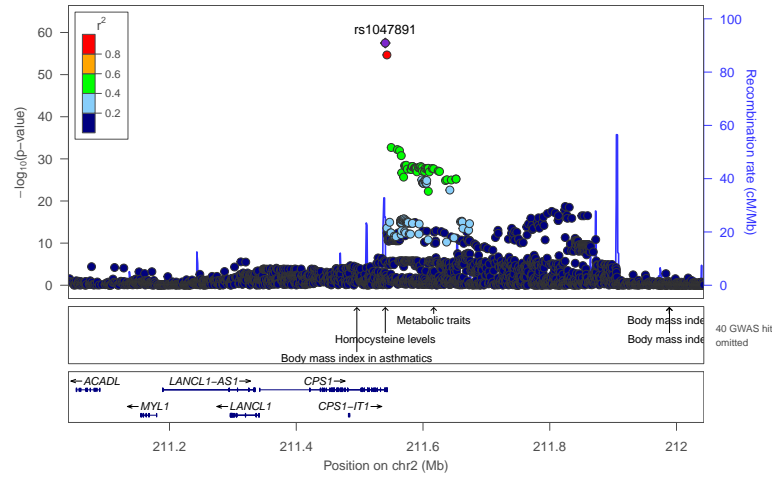

### N-formylmethionine

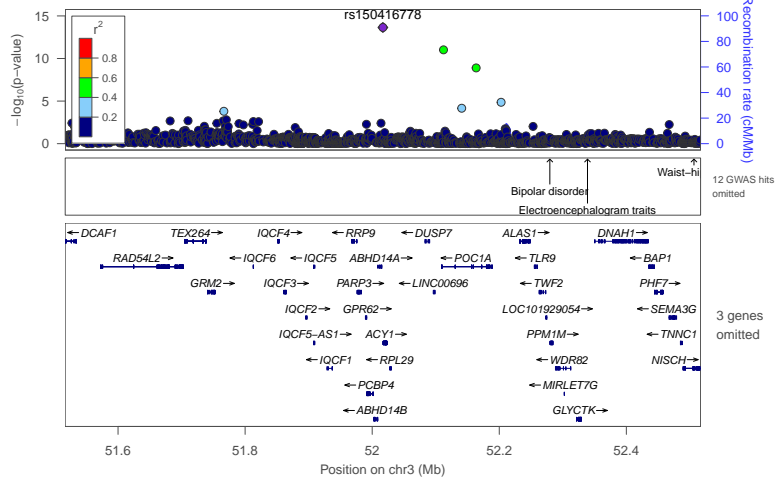

### N-formylmethionine

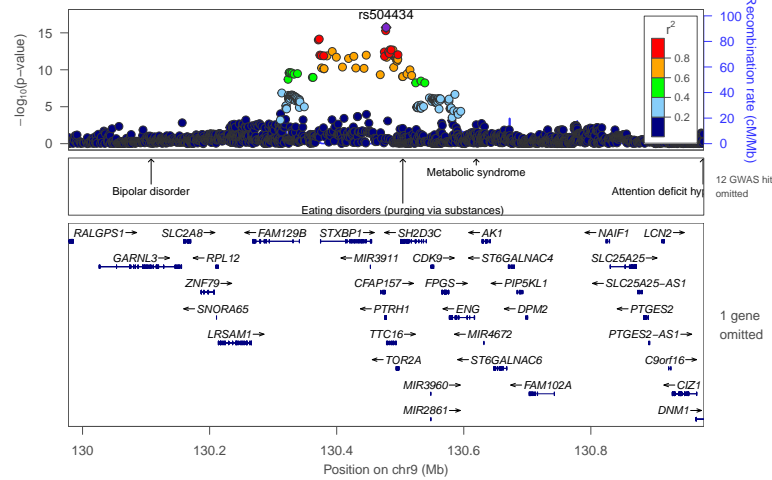

### betaine

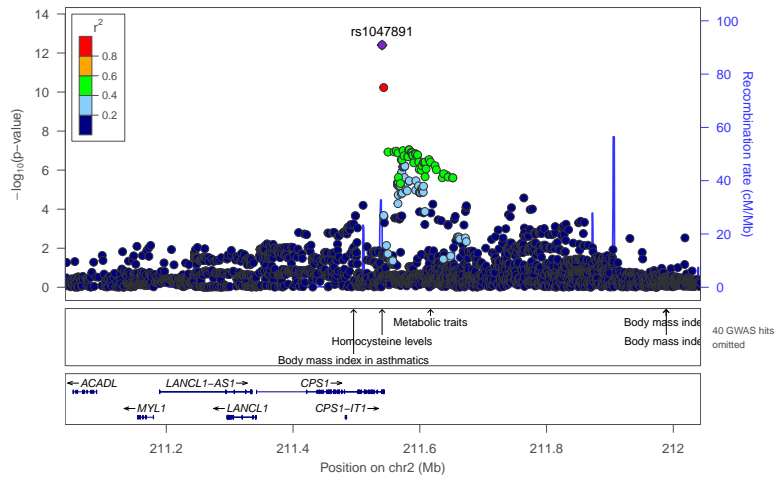

### betaine

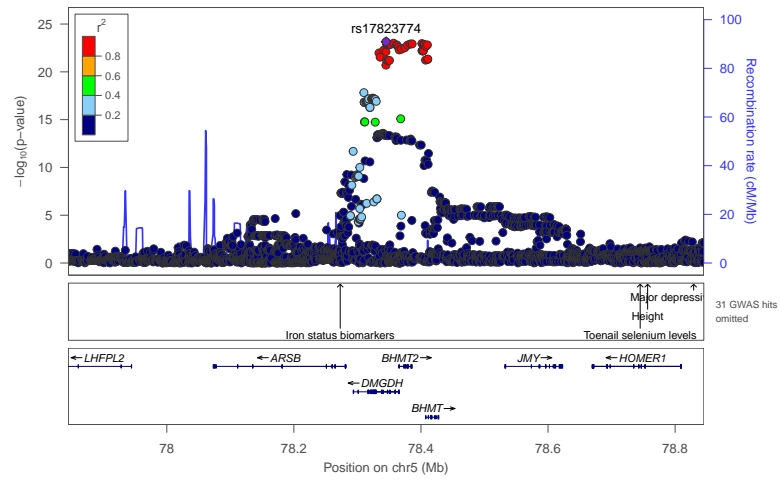

### betaine

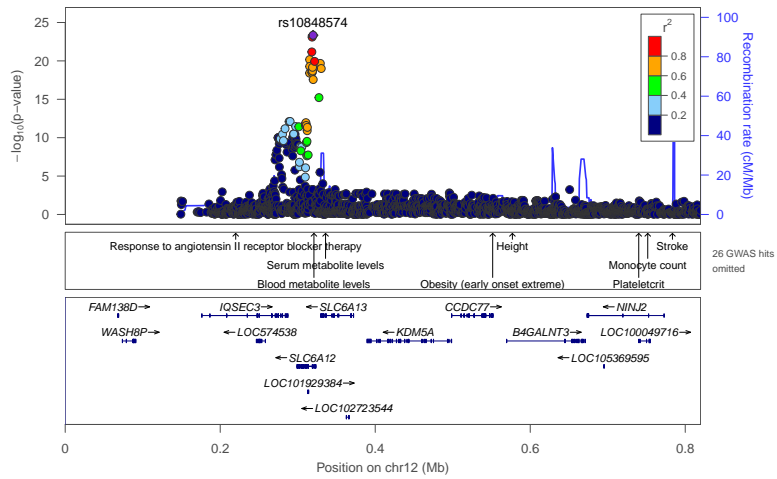

### betaine

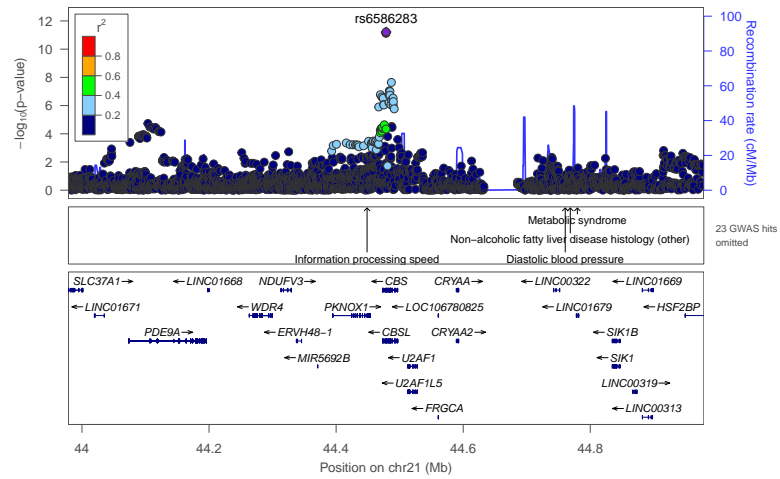

### androsterone sulfate

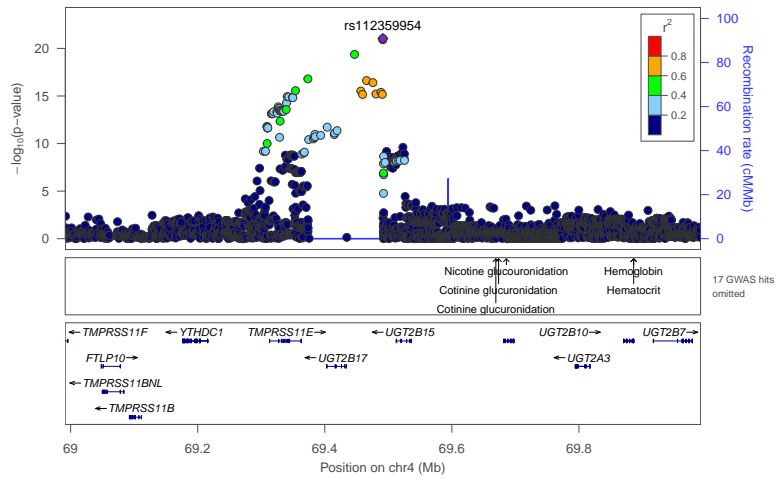

### androsterone sulfate

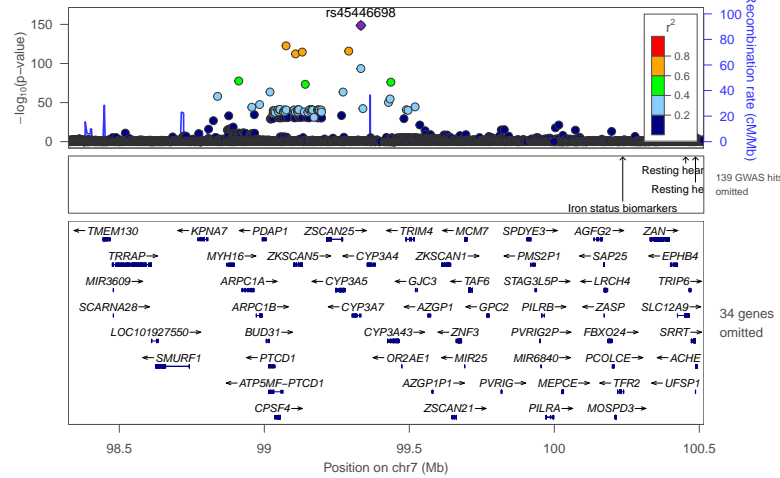

### propionylglycine

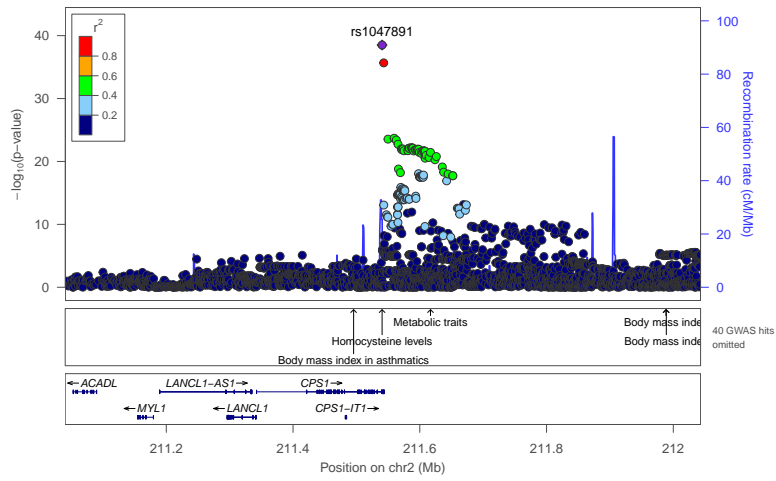

### 3-methylcrotonylglycine

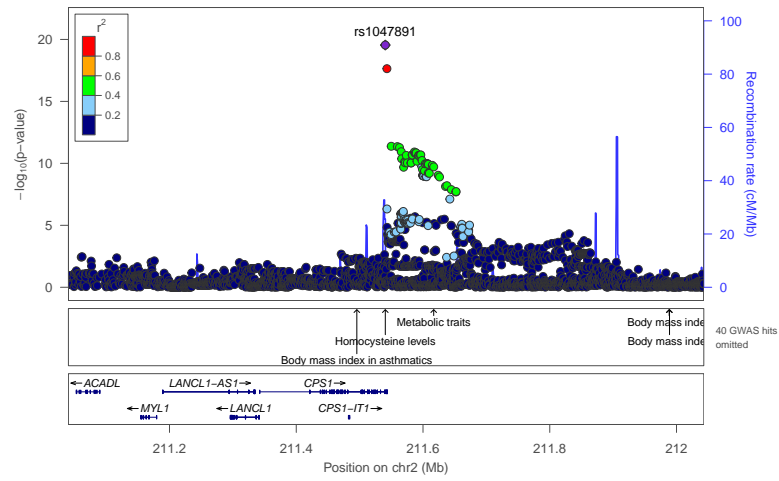

### acetylcarnitine (C2)

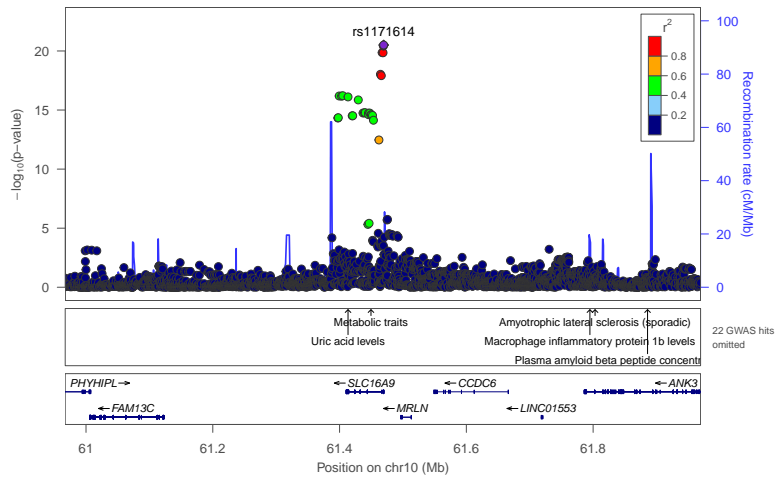

### hexanoylcarnitine (C6)

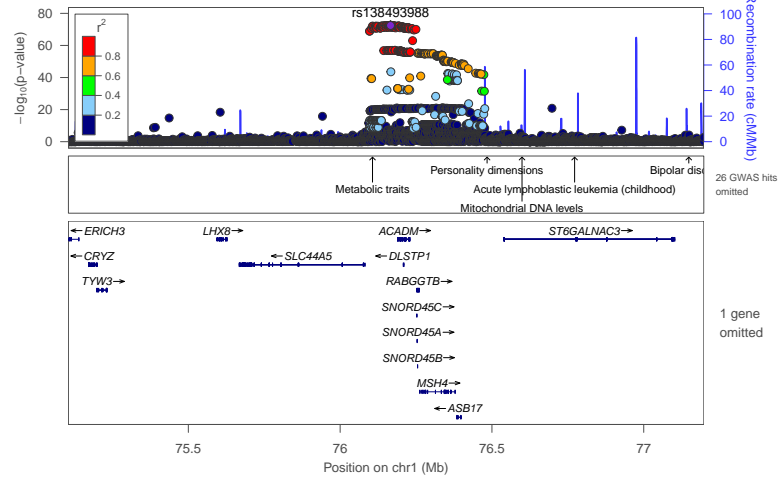

### 1-methyl-4-imidazoleacetate

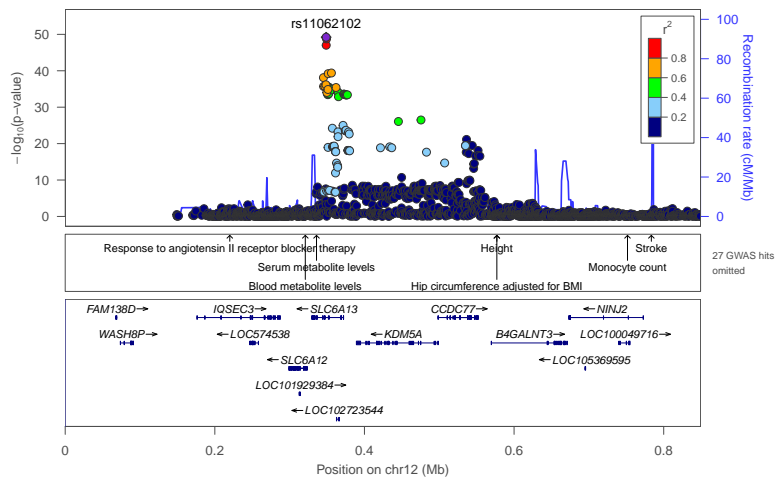

### N-acetyltyrosine

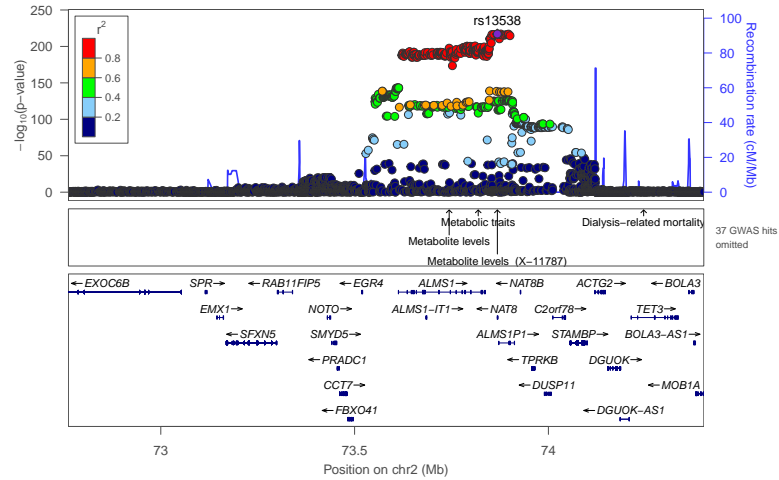

### N-acetyltyrosine

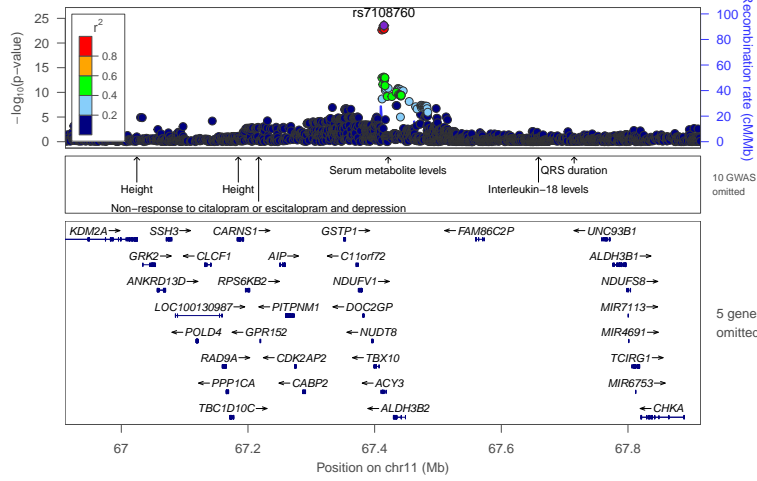

### indolepropionate

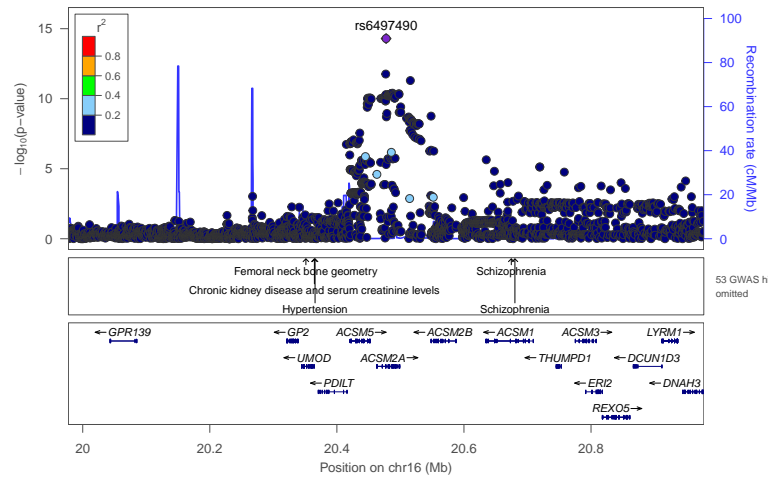

### butyrylcarnitine (C4)

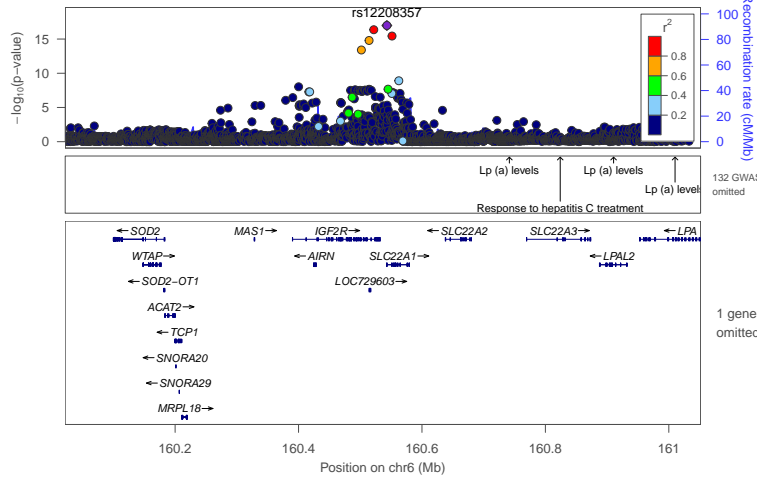

### butyrylcarnitine (C4)

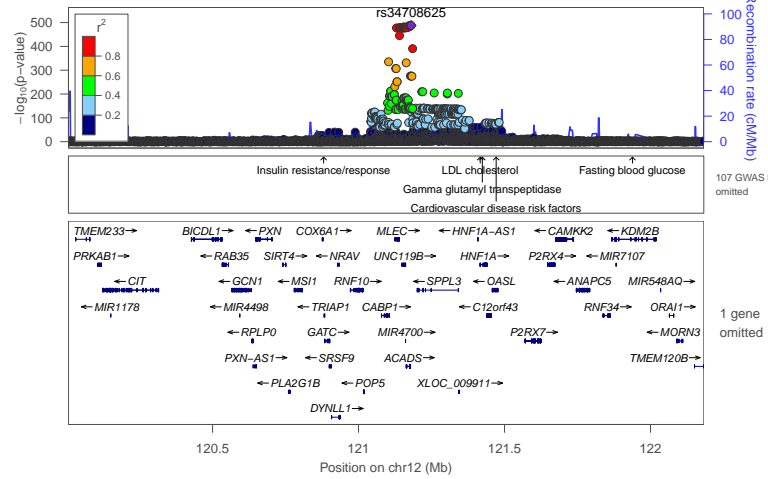

### dehydroepiandrosterone sulfate (DHEA-S)

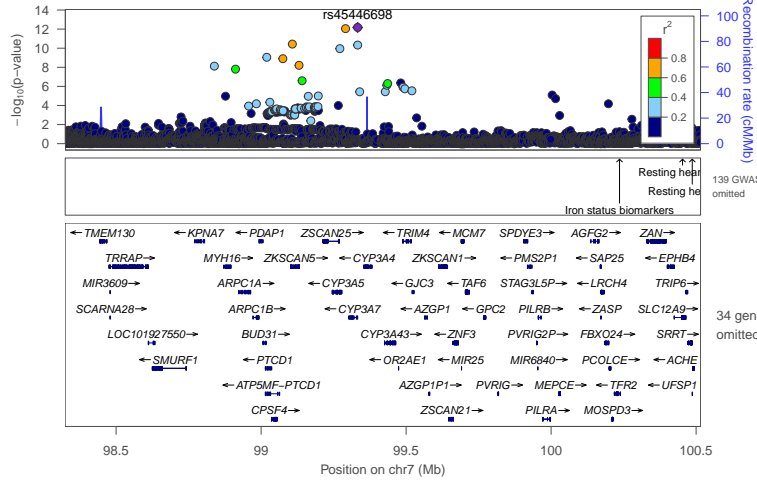

### propionylcarnitine (C3)

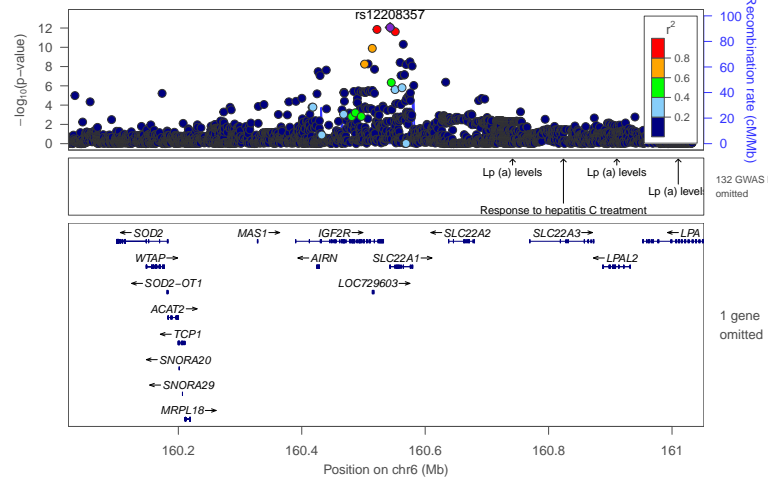

### propionylcarnitine (C3)

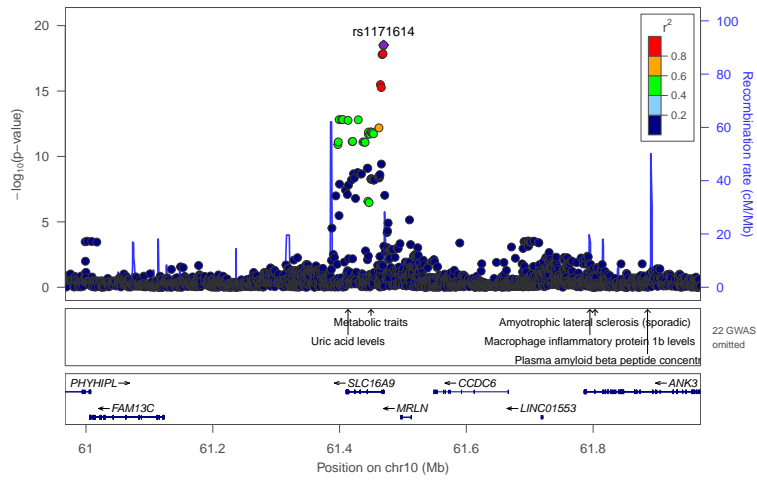

### 3-hydroxylaurate

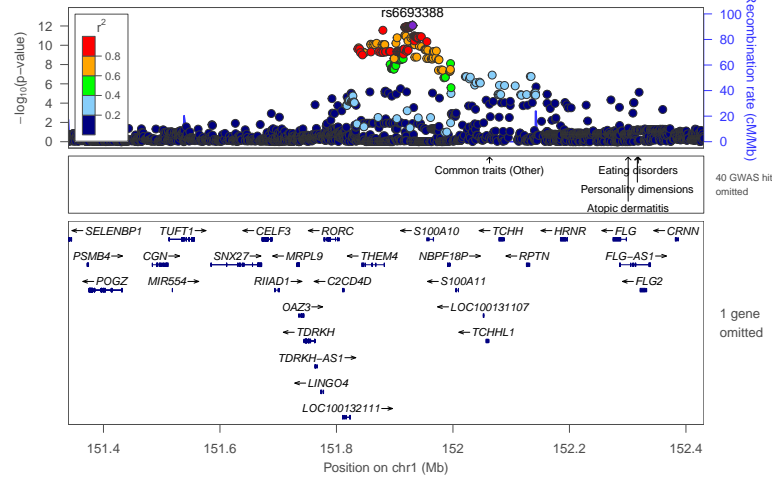

### 10-undecenoate (11:1n1)

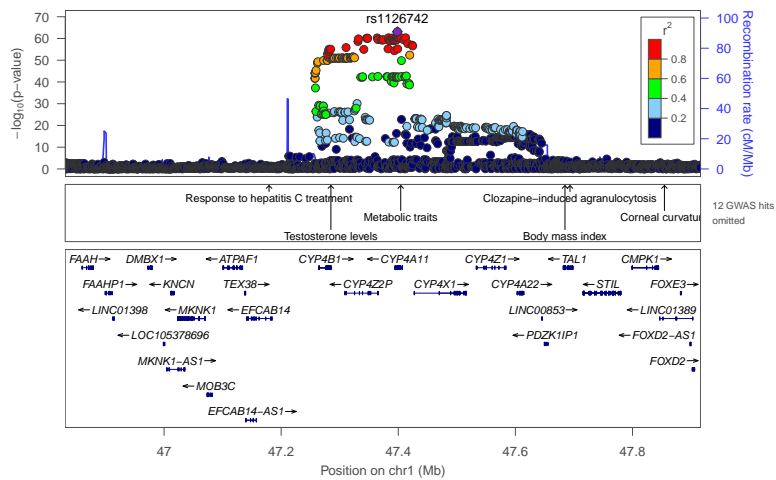

### docosapentaenoate (n3 DPA; 22:5n3)

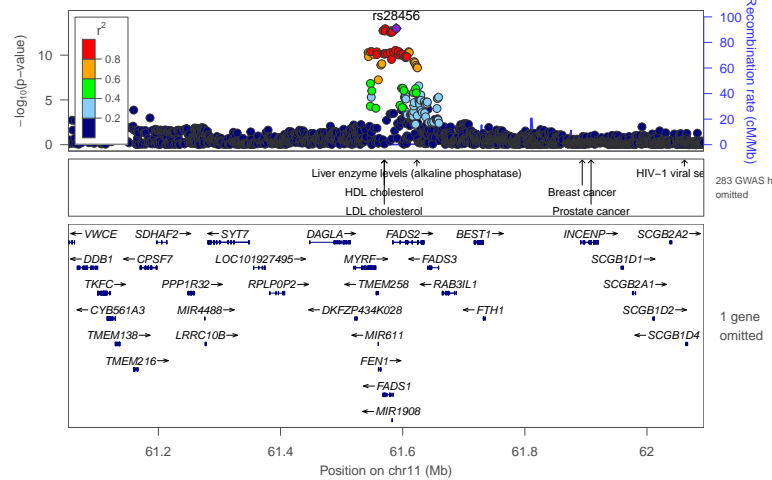

### pregnenediol disulfate (C21H34O8S2)\*

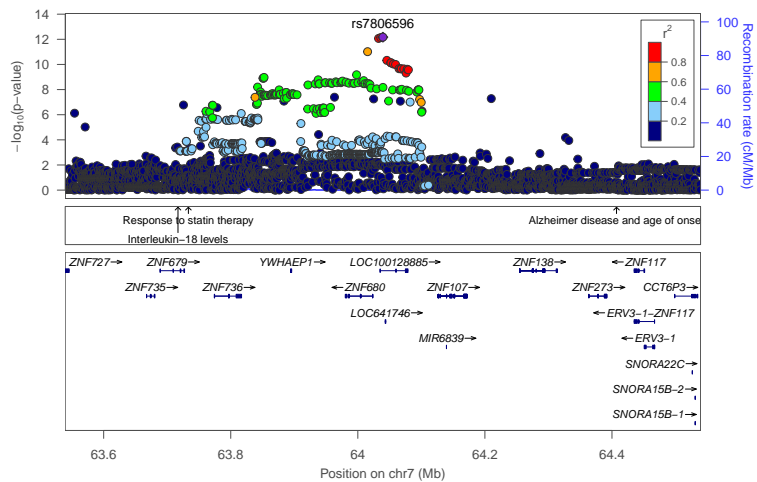

### pregnenediol disulfate (C21H34O8S2)\*

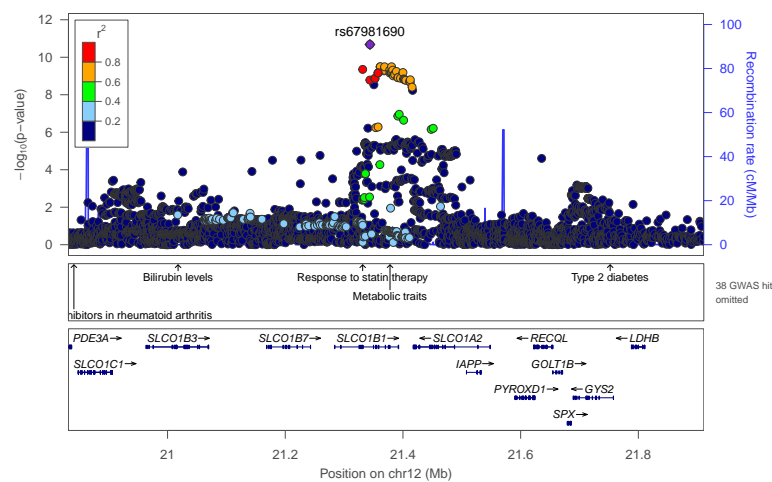

pregnenediol disulfate (C21H34O8S2)\*

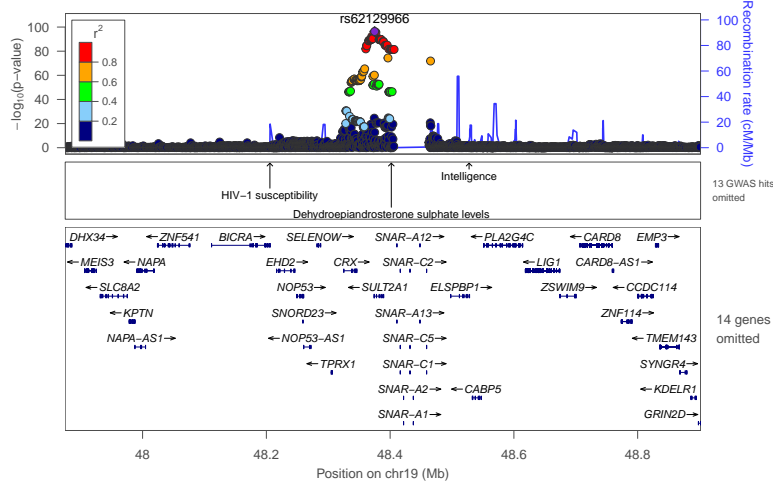

bilirubin (E,E)\*

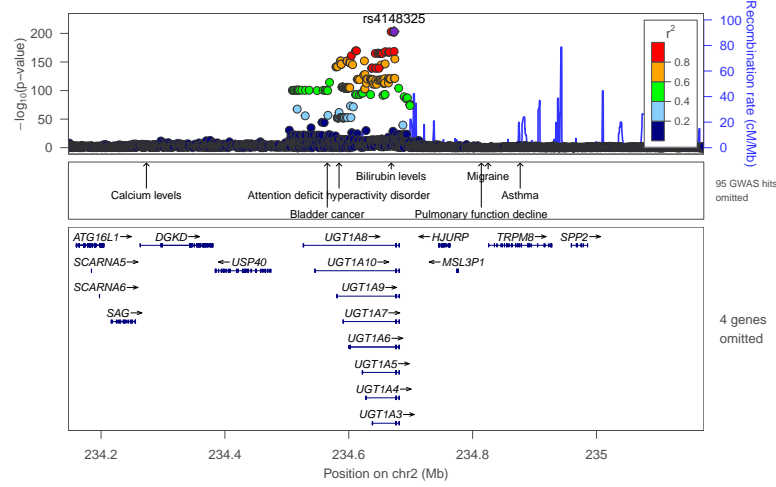

glycolithocholate sulfate\*

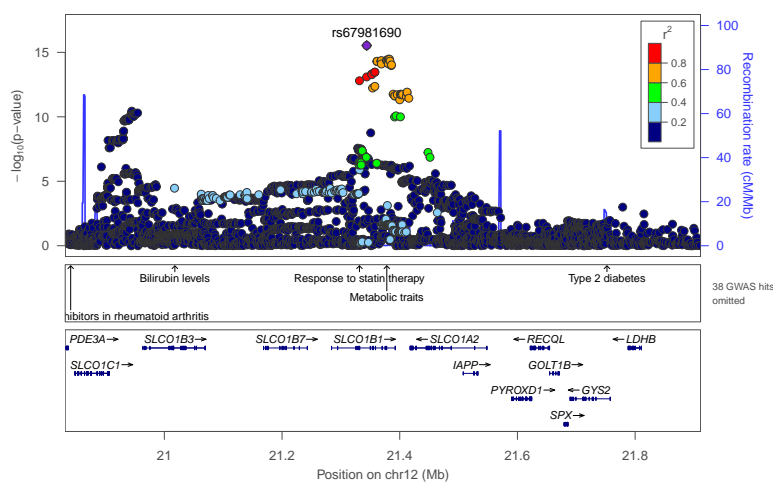

taurocholate sulfate\*

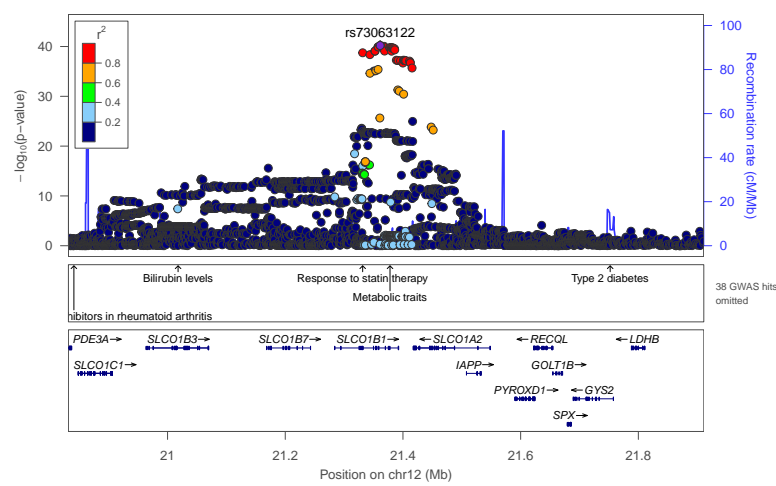

andro steroid monosulfate C19H28O6S (1)\*

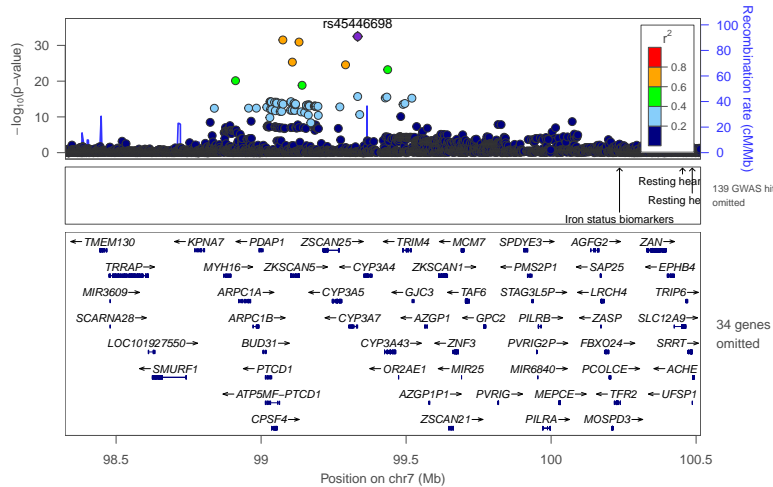

adrenate (22:4n6)

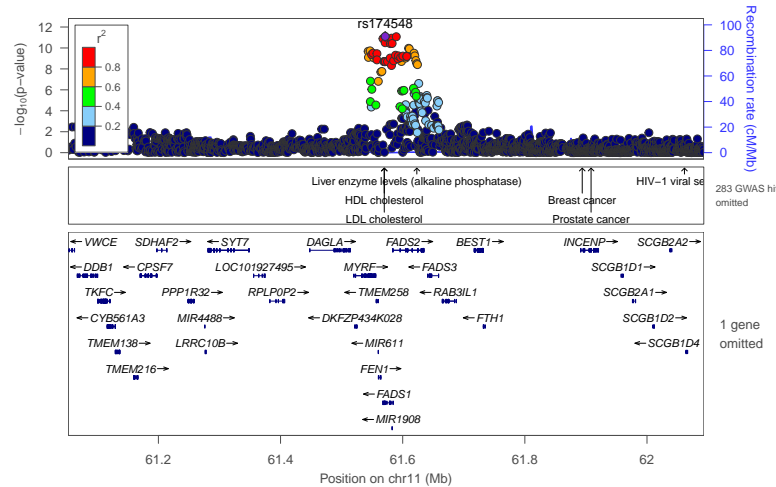



### N-alpha-acetylornithine

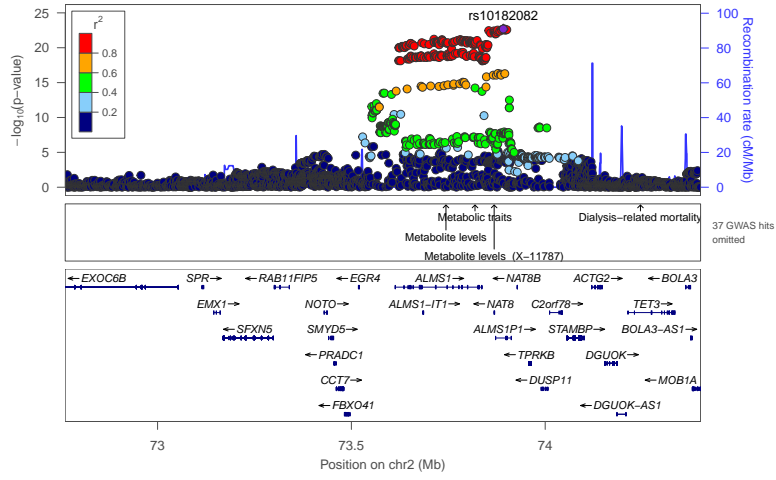

### homostachydrine\*

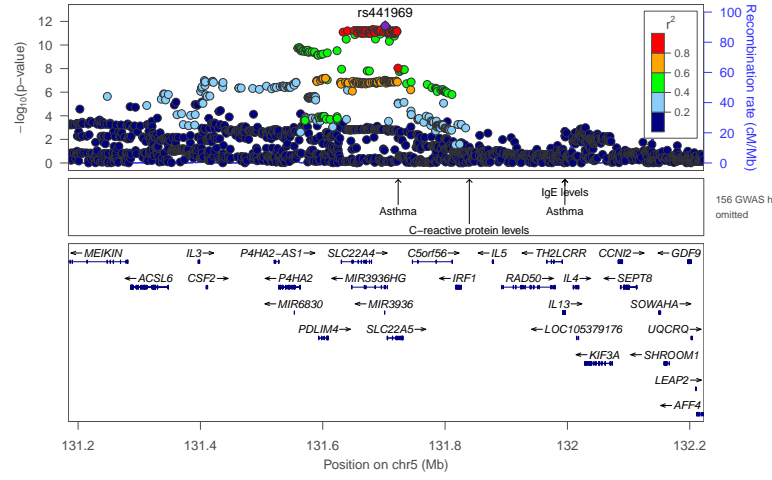

### X - 11787

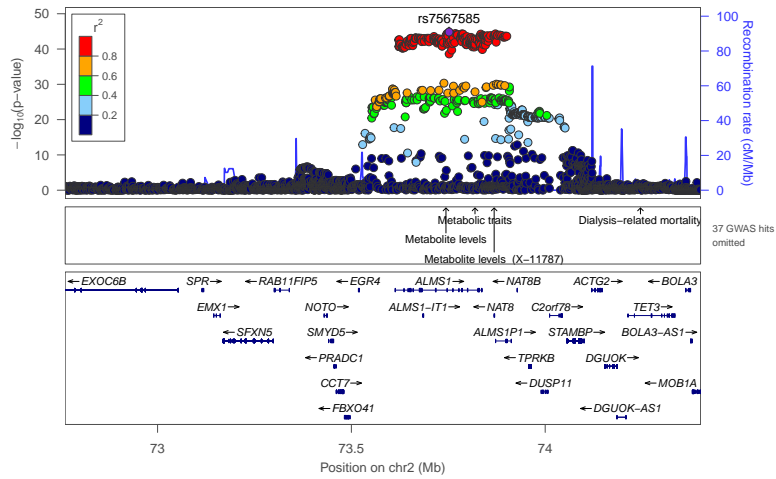

### X - 11787

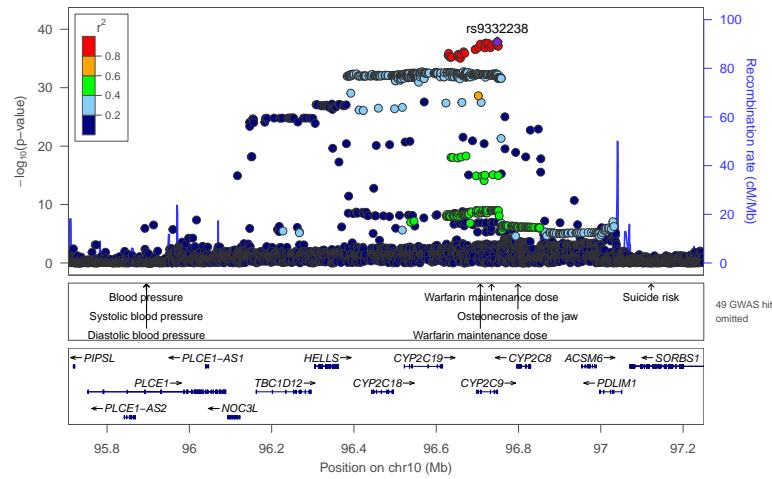

### 1-arachidonoyl-GPC (20:4n6)\*

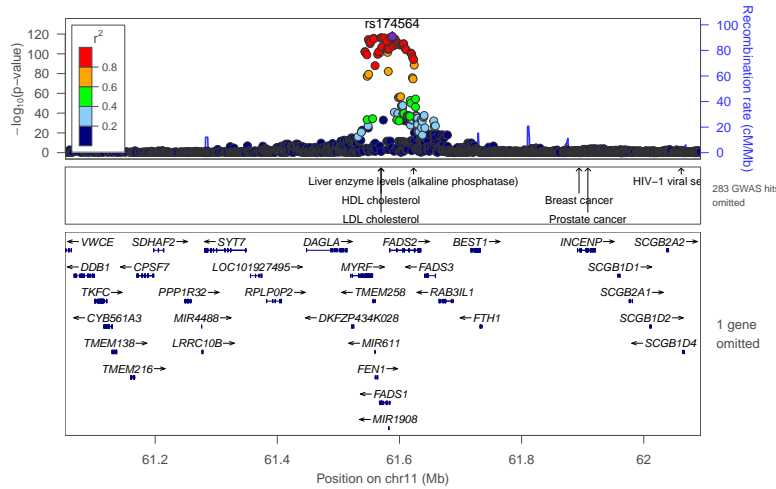

### 1-palmitoleoyl-GPC (16:1)\*

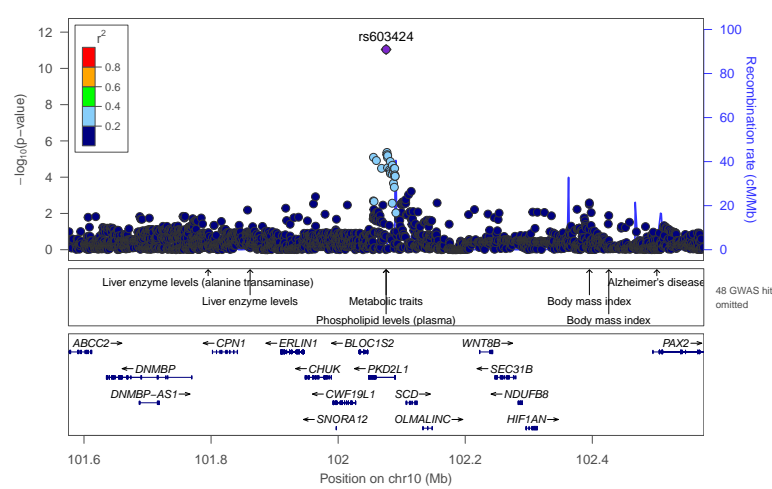

### isobutyrylcarnitine (C4)

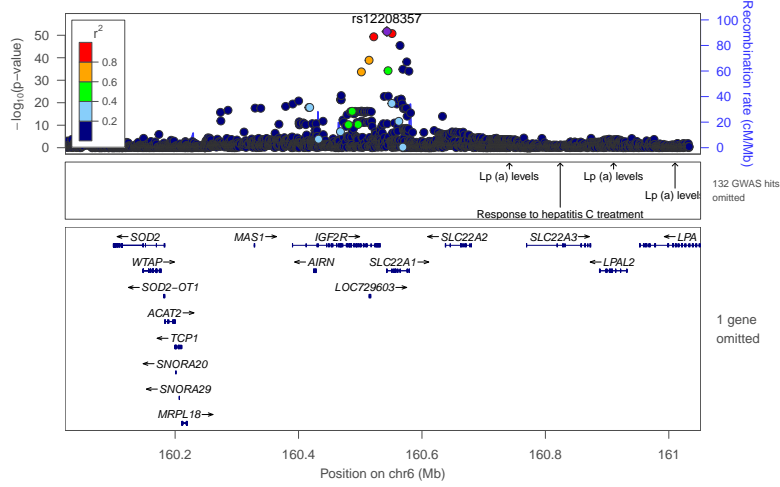

### isobutyrylcarnitine (C4)

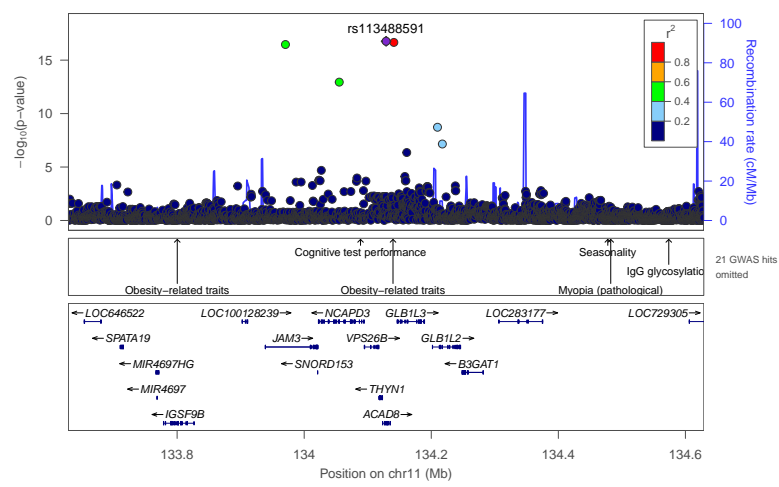

### octanoylcarnitine (C8)

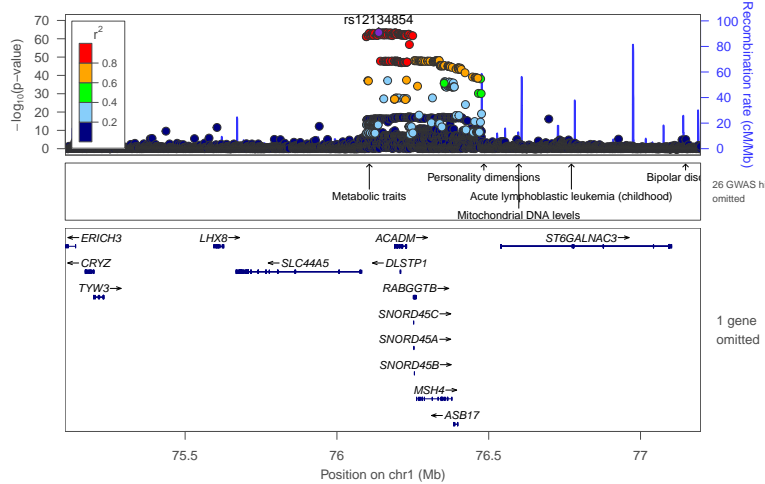

### octanoylcarnitine (C8)

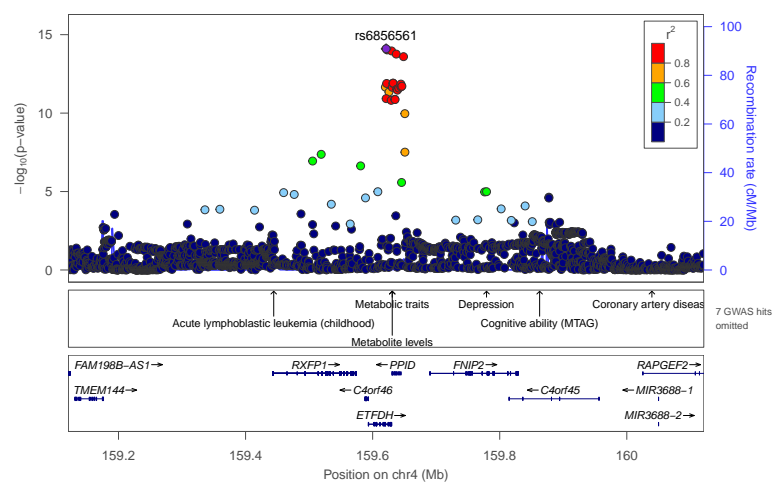

### decanoylcarnitine (C10)

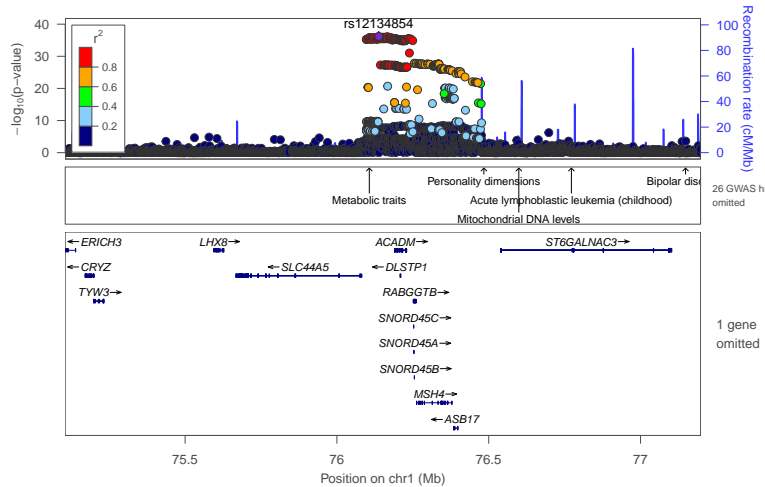

### decanoylcarnitine (C10)

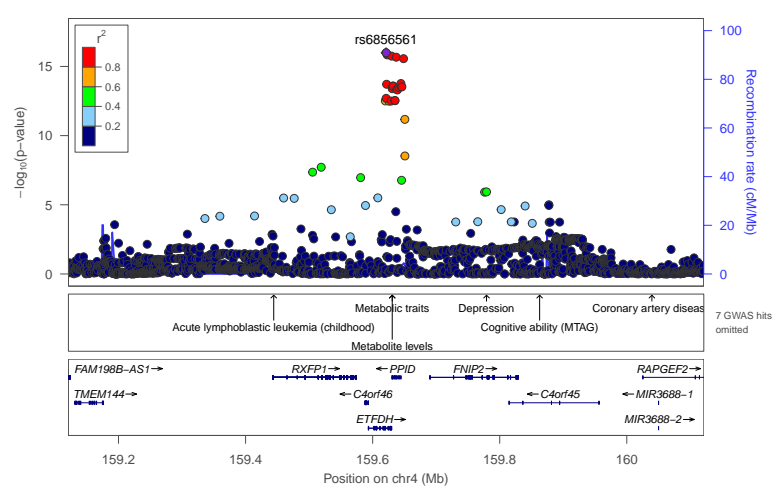

### N-acetylasparagine

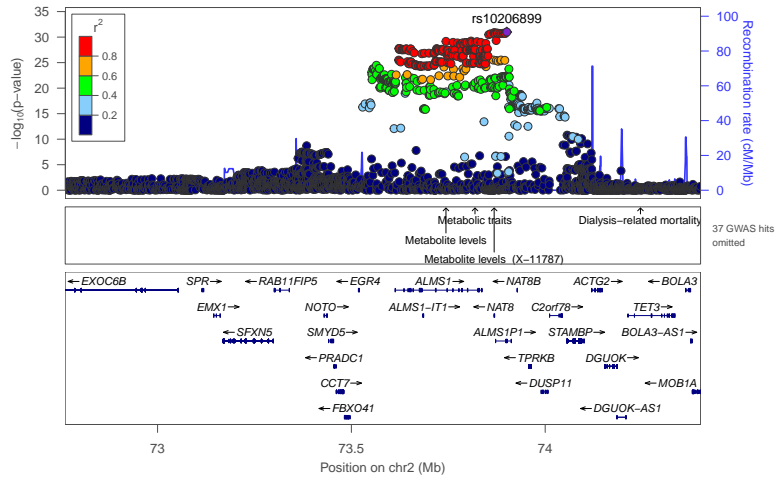

### N-acetylglutamine

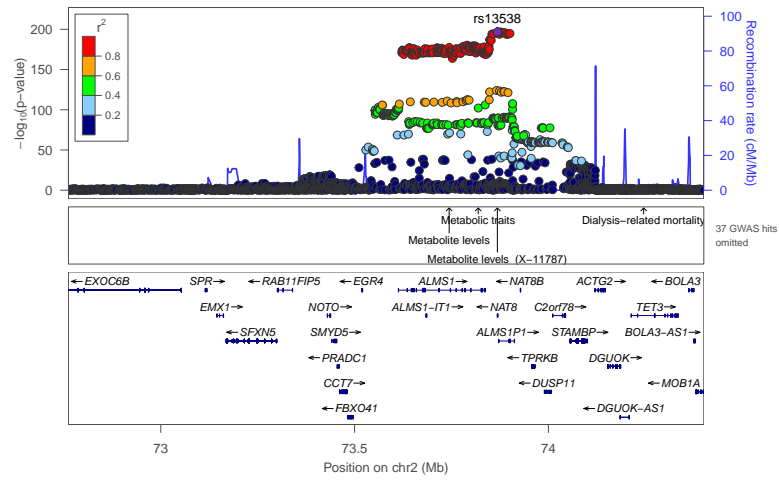

### N-acetylhistidine

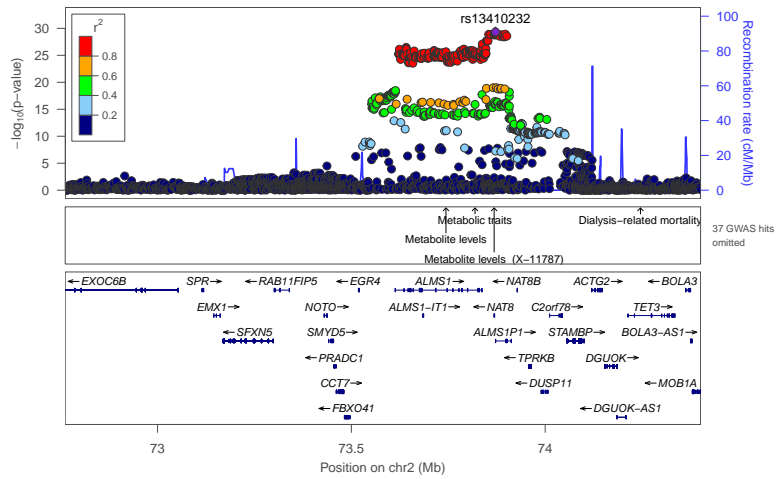

### N-acetylhistidine

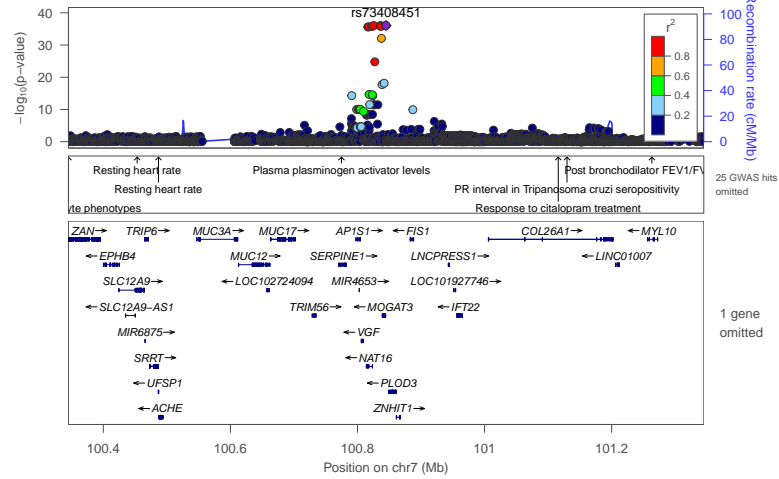

### gamma-glutamylglycine

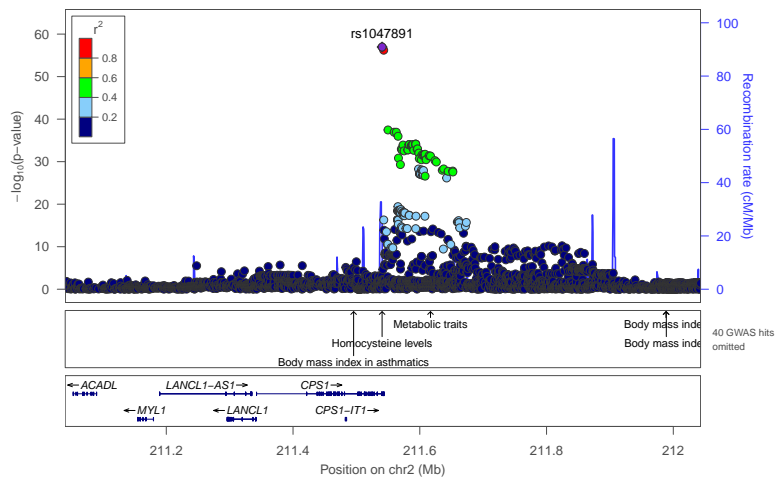

### N-acetylphenylalanine

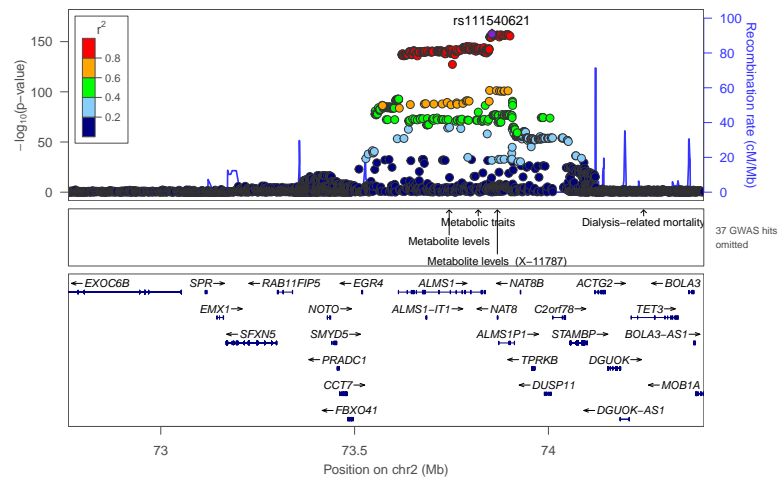

### N-acetylphenylalanine

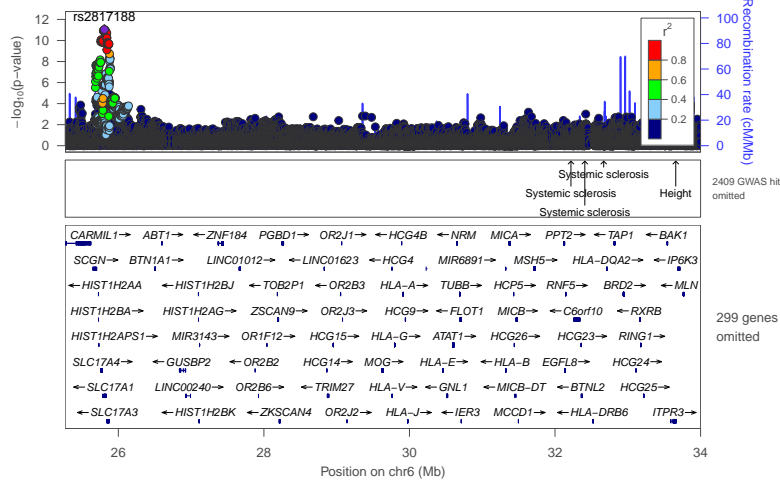

### N-acetylphenylalanine

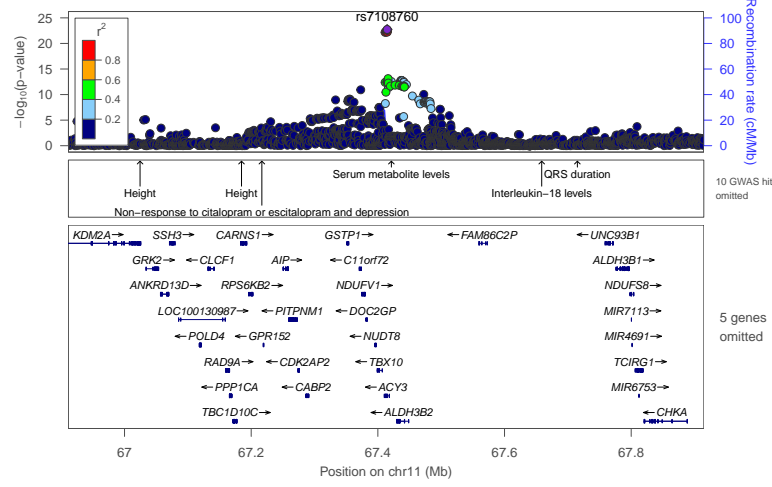

### N-acetylarginine

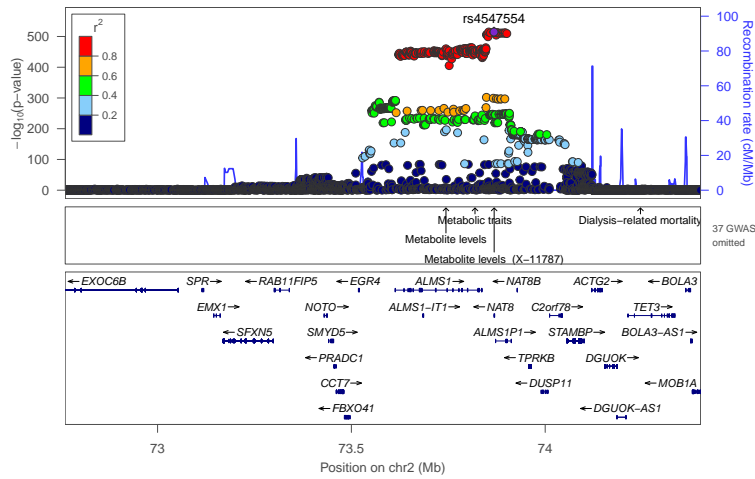

### 1-palmitoyl-GPC (16:0)

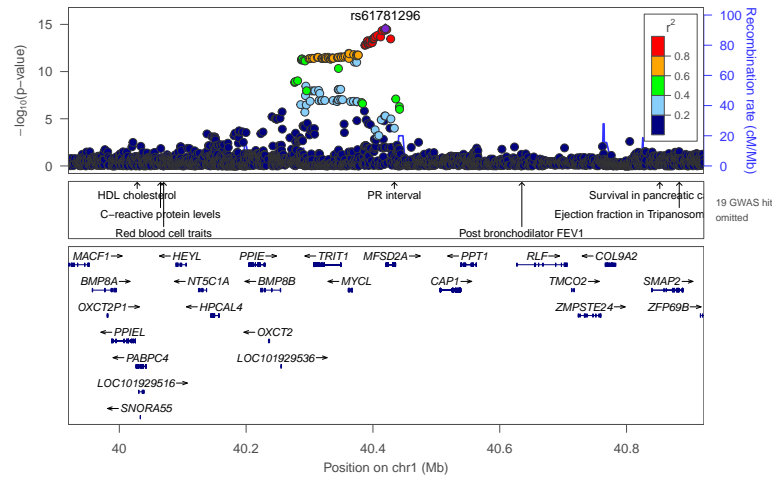

### N-acetyltryptophan

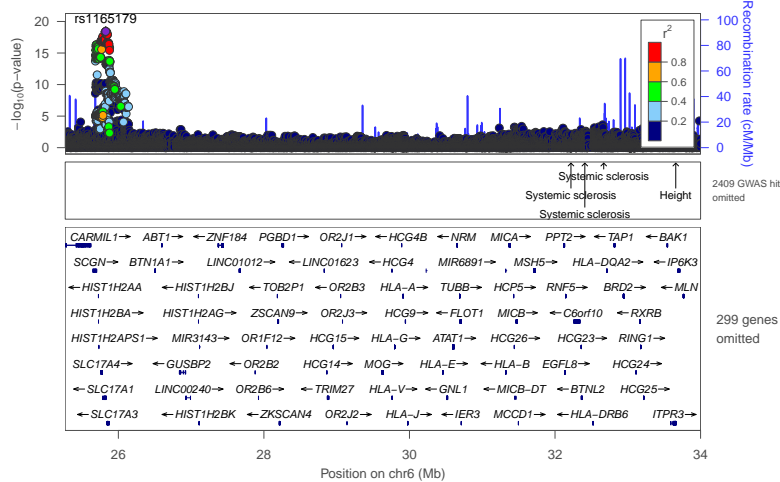

### N-acetyltryptophan

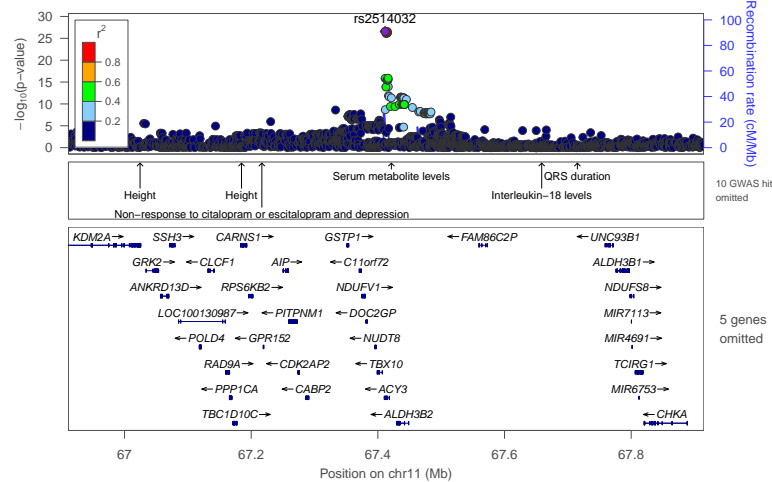

### 1-stearoyl-GPC (18:0)

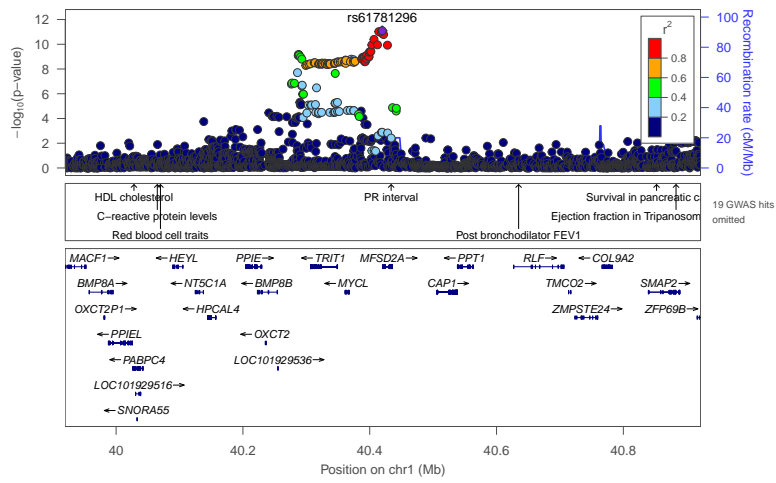

### stearidonate (18:4n3)

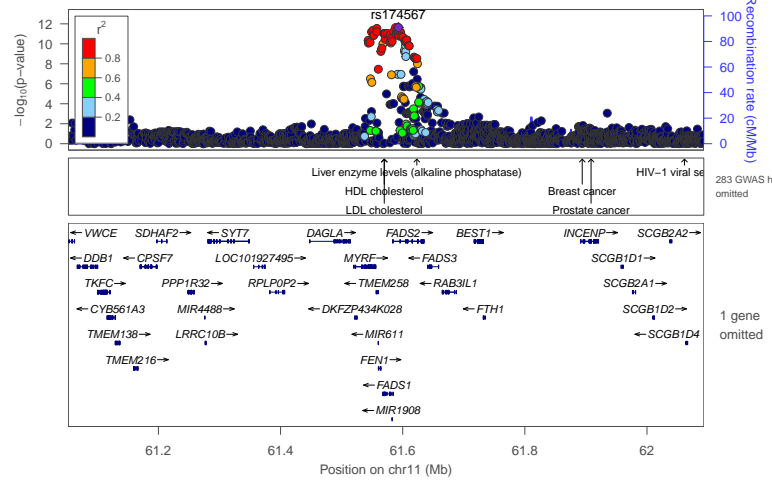

### epiandrosterone sulfate

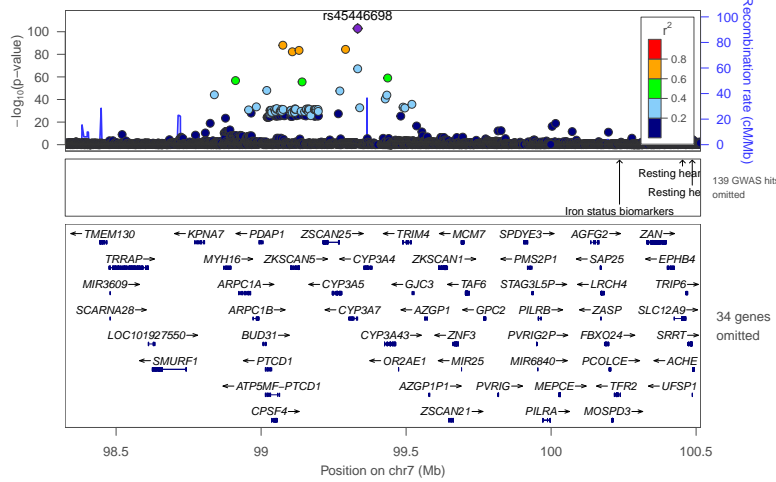

### tauro-beta-muricholate

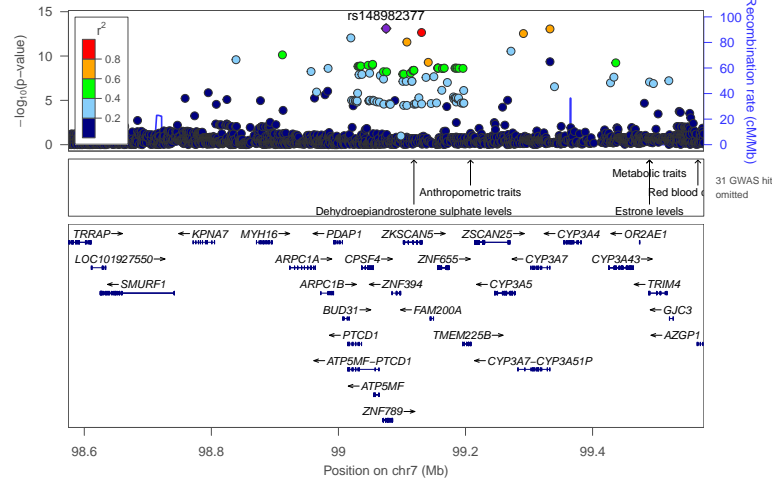

### 1-arachidonoyl-GPI (20:4)\*

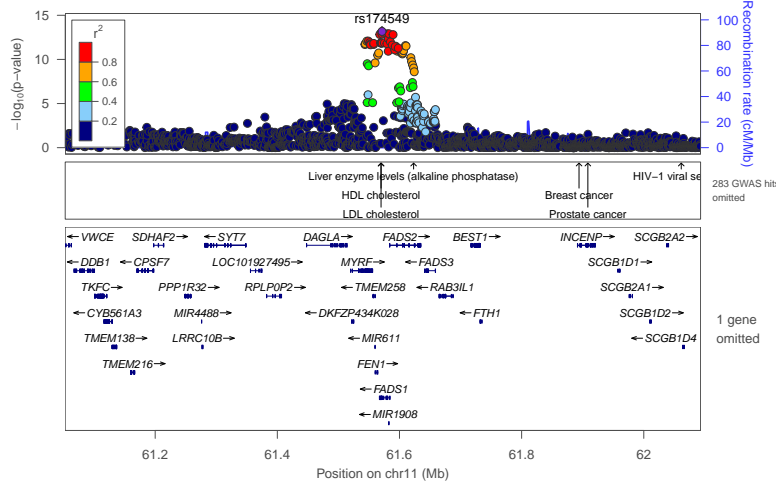

### 1-arachidonoyl-GPI (20:4)\*

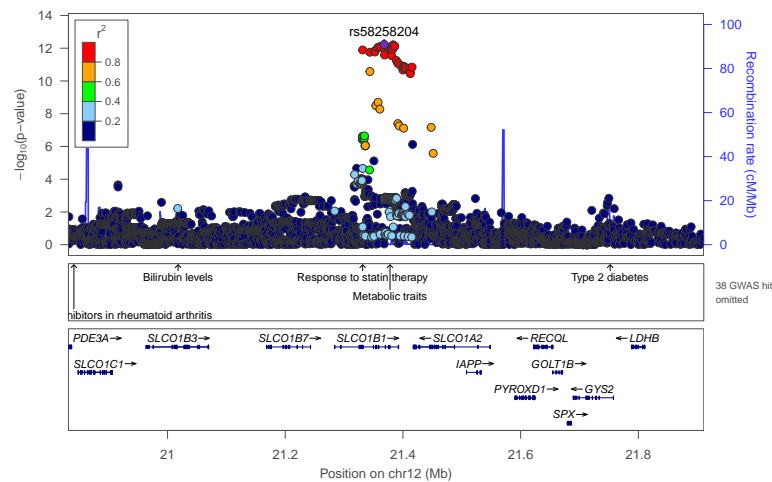

### N-acetylproline

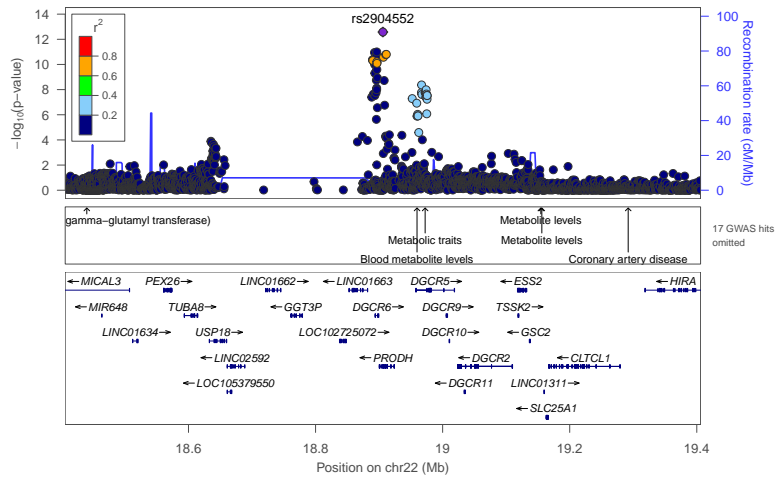

### 1-methylxanthine

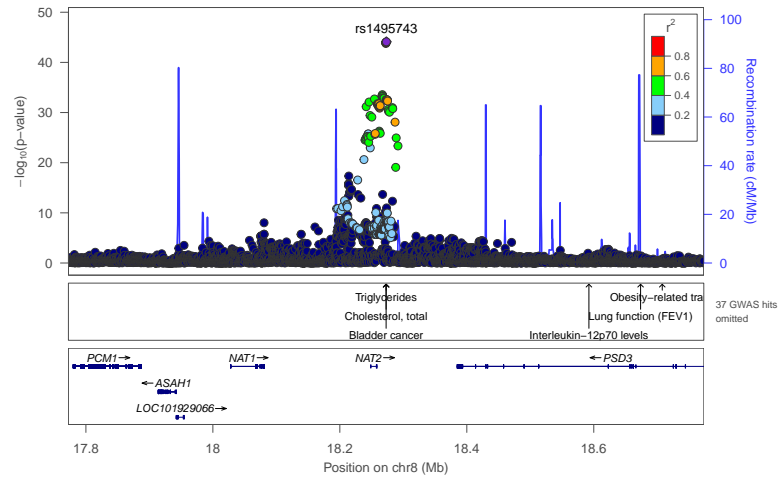

### 1-methylurate

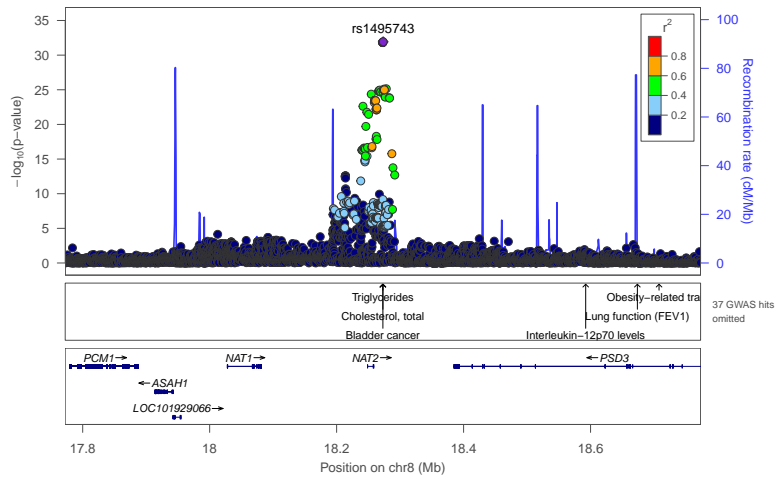

### 1-arachidonylglycerol (20:4)

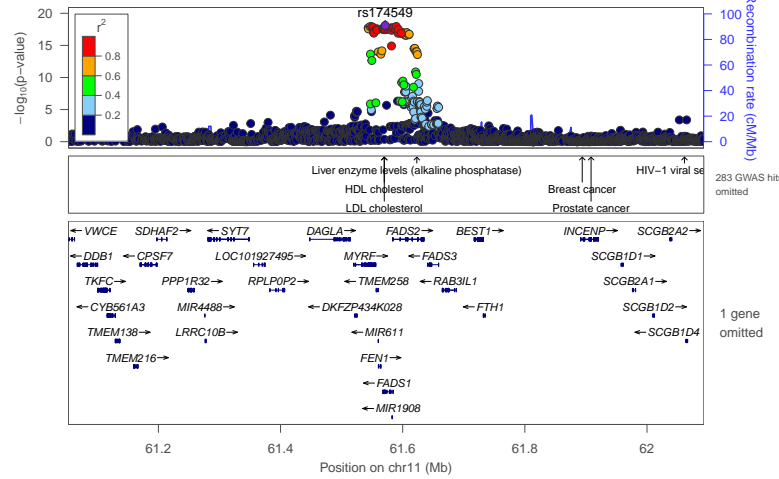

### 5-acetylamino-6-formylamino-3-methyluracil

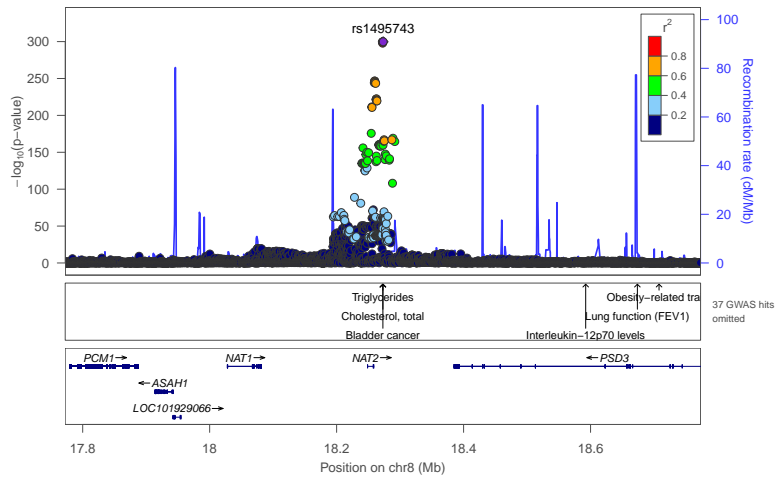

### isovalerylcarnitine (C5)

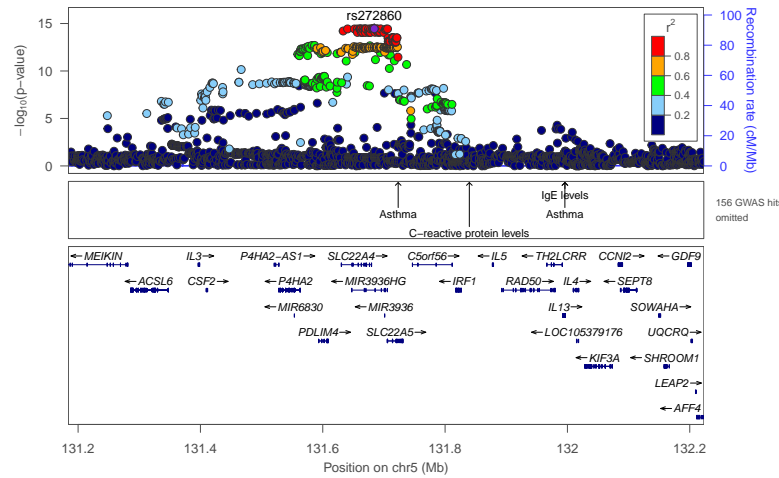



### isovalerylcarnitine (C5)

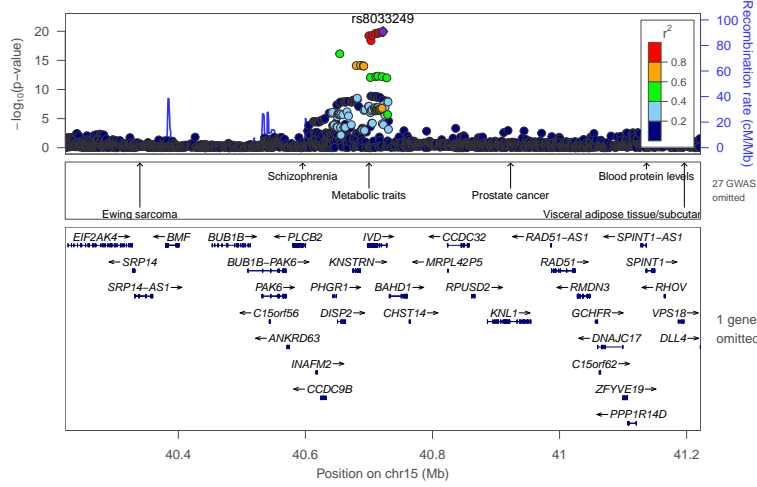

### stearoylcarnitine (C18)

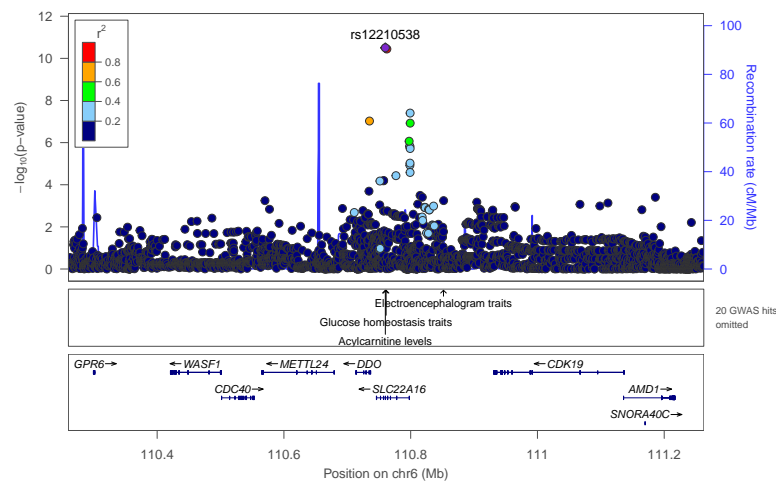

### 5-acetylamin-6-amino-3-methyluracil

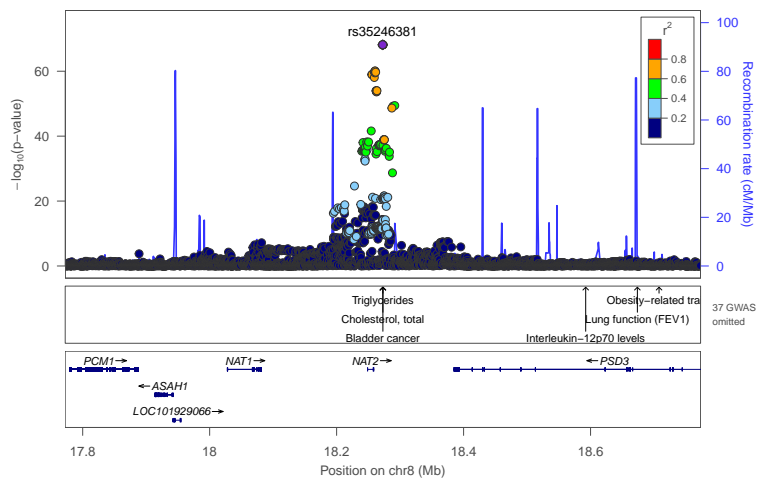

### 5-methyluridine (ribothymidine)

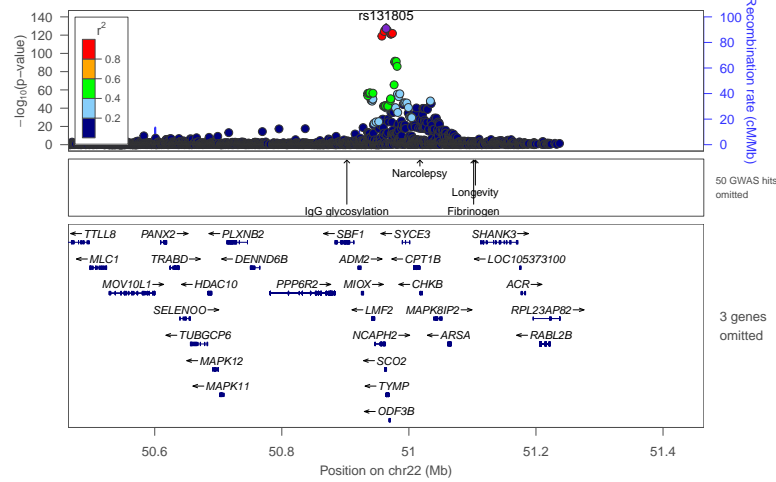

### cysteine-glutathione disulfide

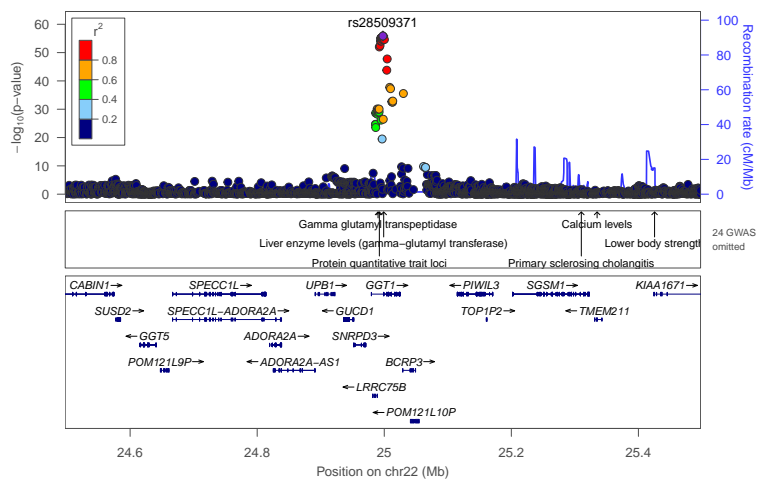

### oleoylcarnitine (C18:1)

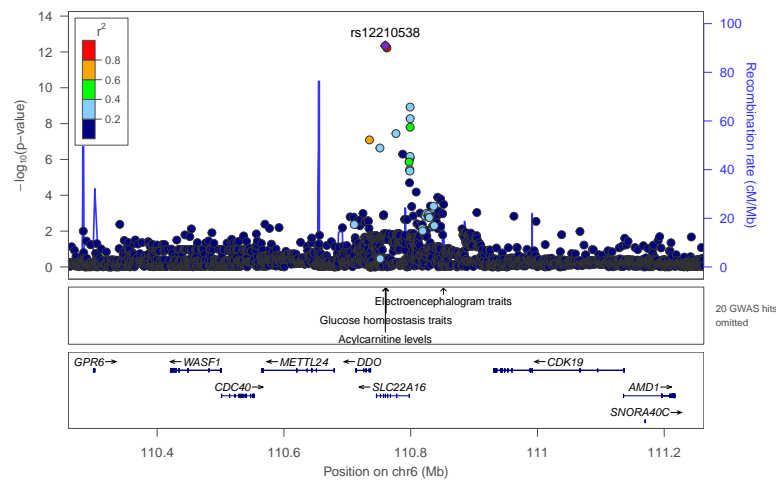

### orotidine

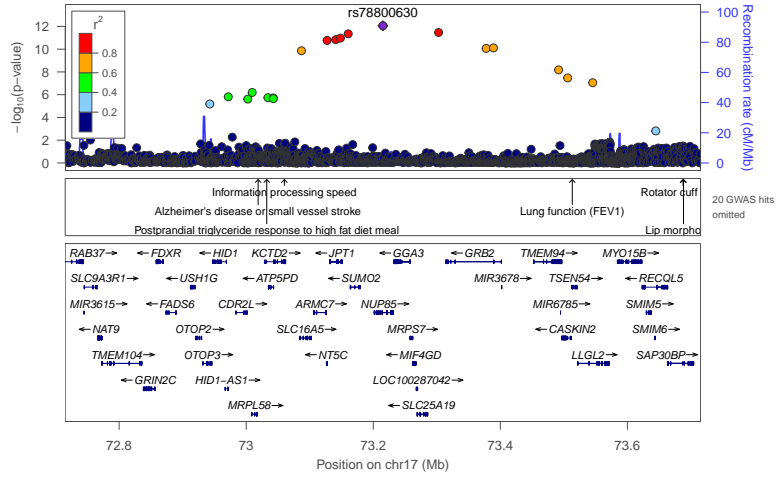

### mead acid (20:3n9)

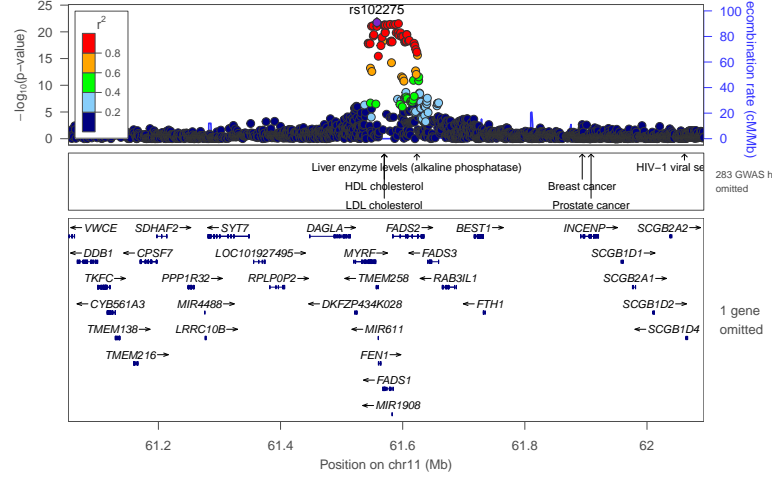

### 1-arachidonoyl-GPE (20:4n6)\*

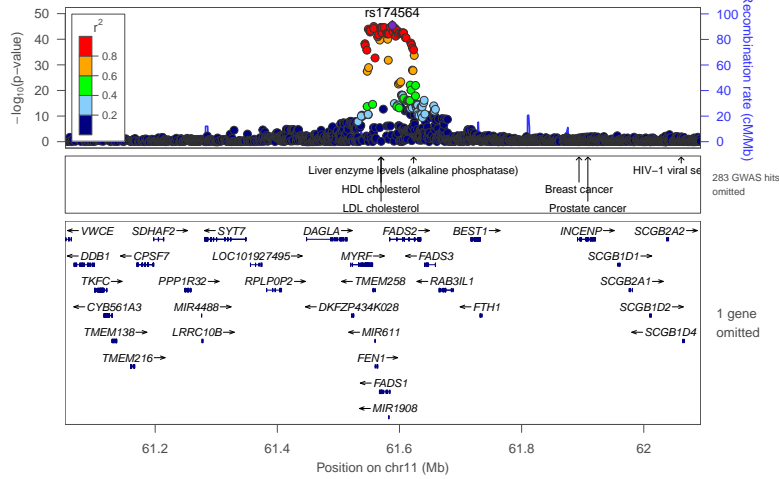

### cholesterol sulfate

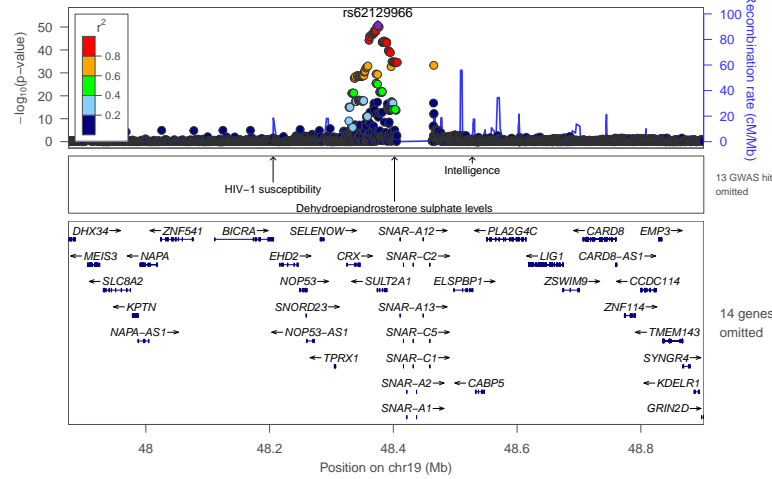

### beta-hydroxyisovalerylcarnitine

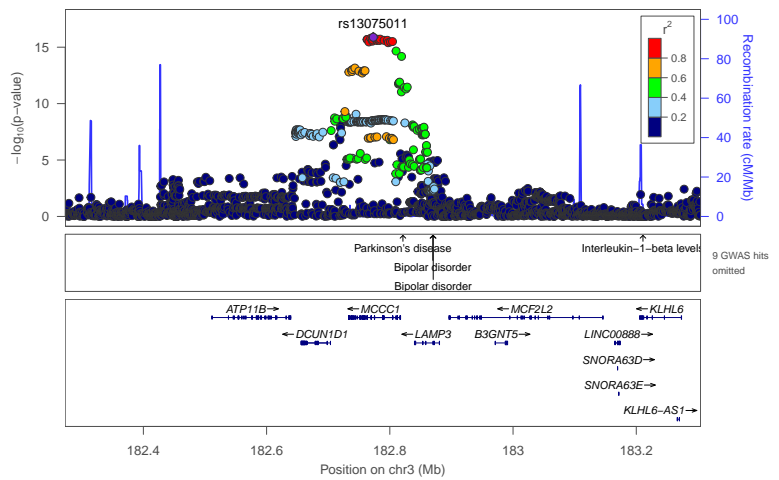

### hexanoylglycine

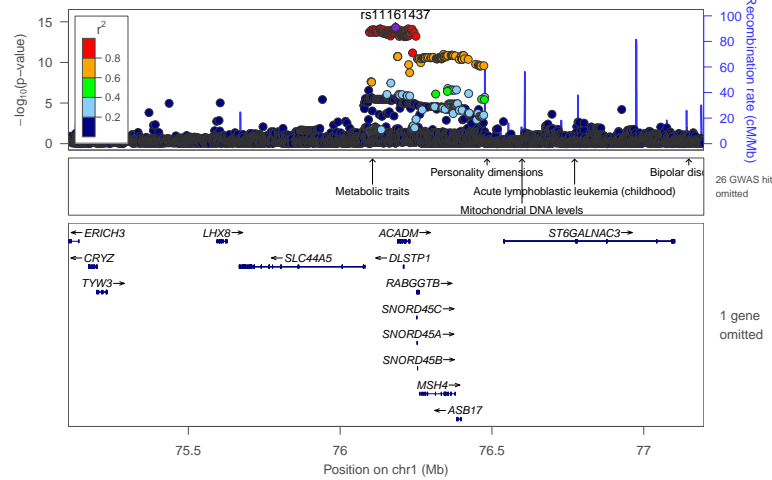

### hexanoylglycine

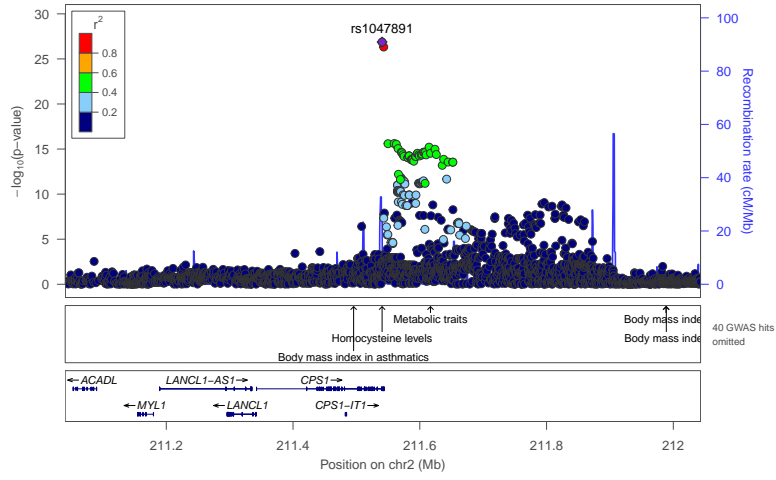

### 1-palmitoyl-GPE (16:0)

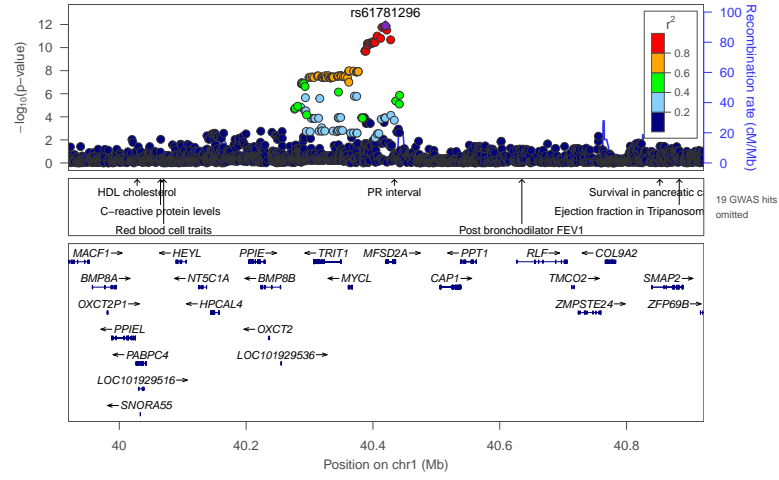

### 1-palmitoyl-GPE (16:0)

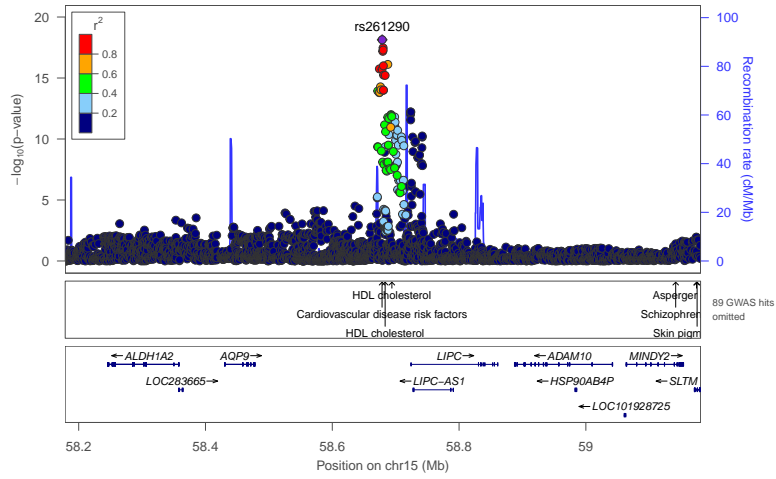

### cysteinylglycine

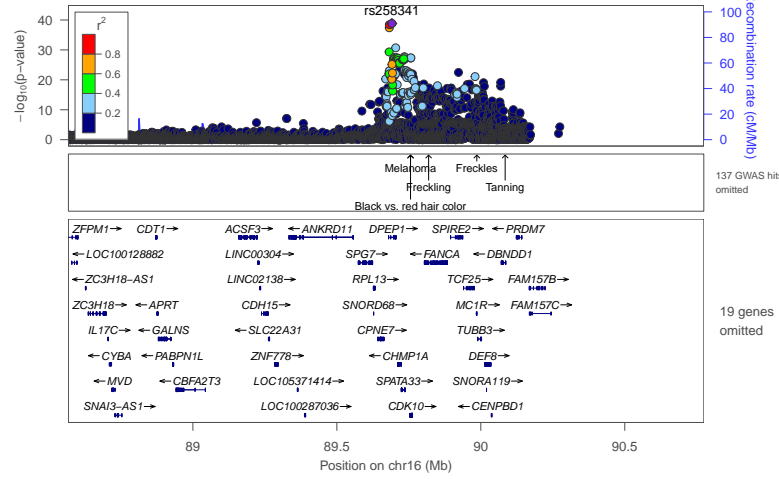

### N-acetyl-aspartyl-glutamate (NAAG)

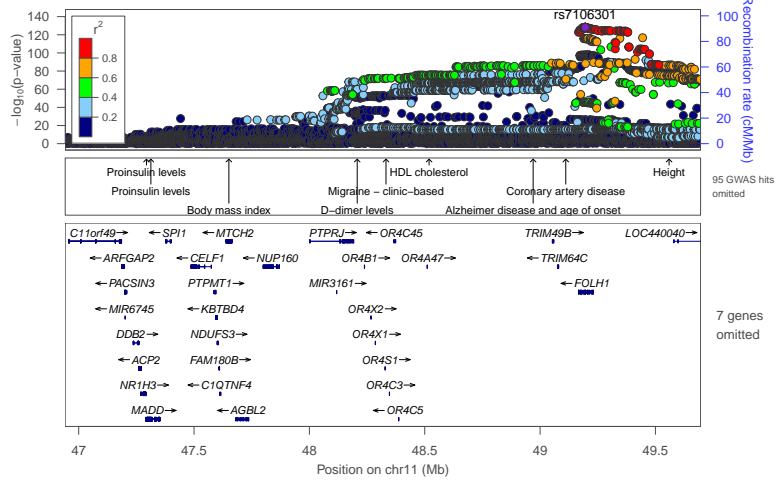

### N-acetyl-aspartyl-glutamate (NAAG)

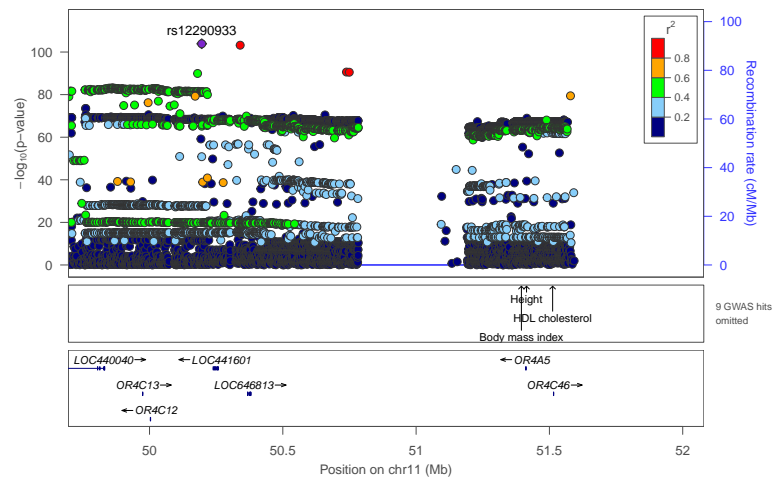

### N-acetyl-aspartyl-glutamate (NAAG)

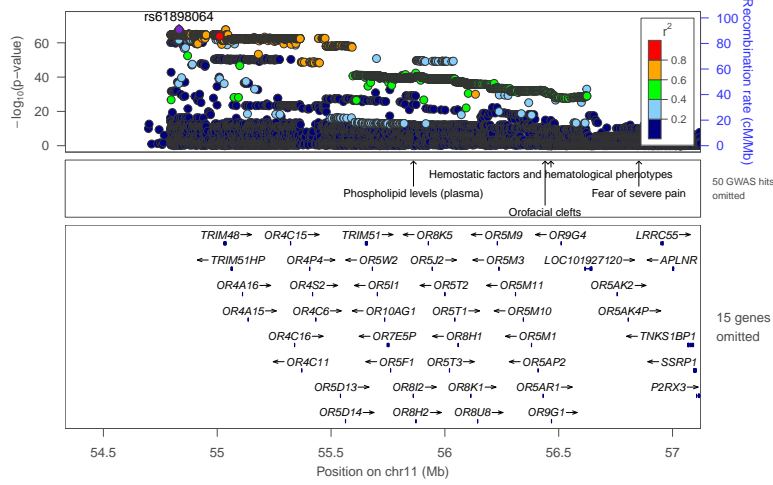

### tetradecanedioate (C14-DC)

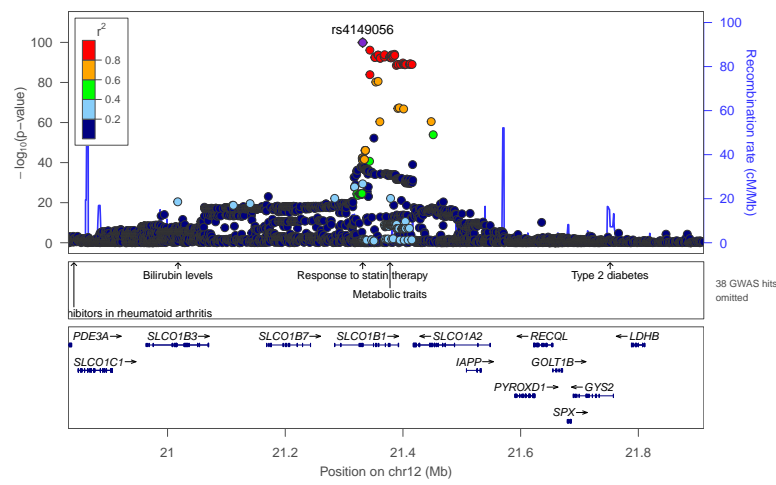

### hexadecanedioate (C16-DC)

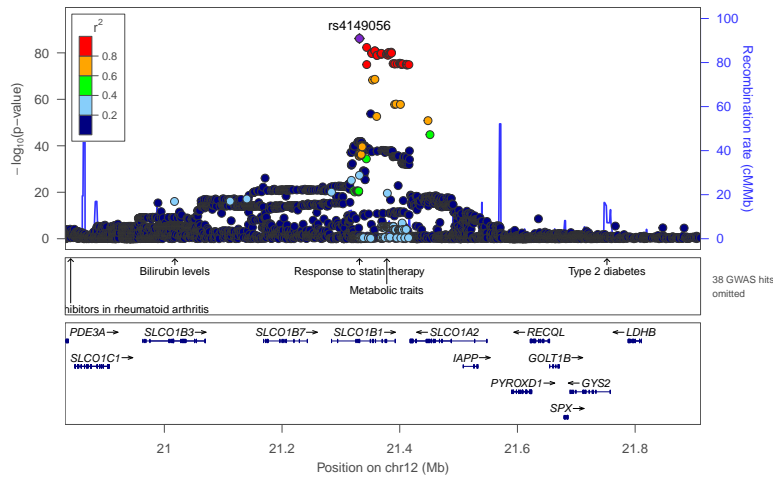

### hexadecanedioate (C16-DC)

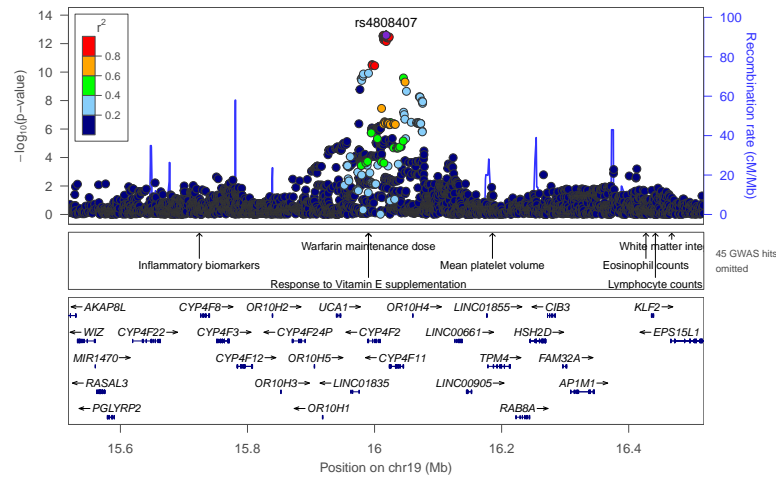

### thymol sulfate

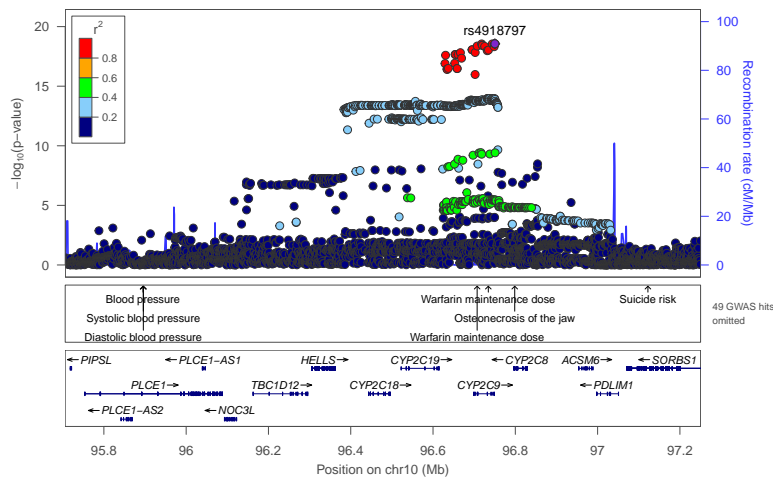

### 1-linoleoyl-GPI (18:2)\*

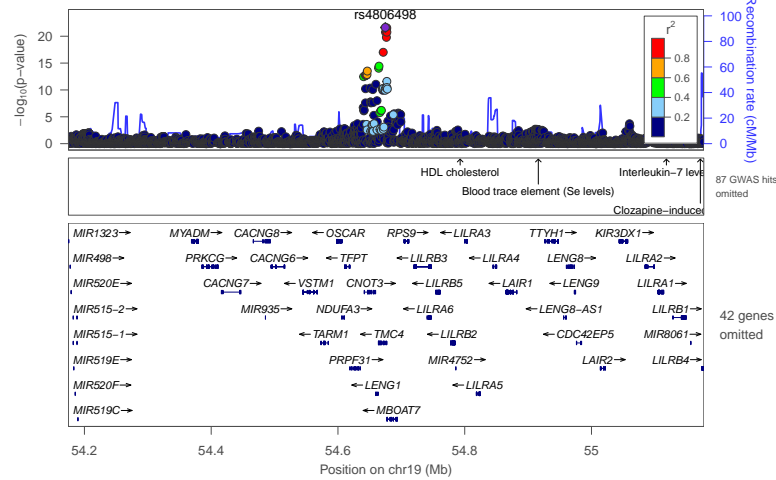

### 1-linoleoyl-GPE (18:2)\*

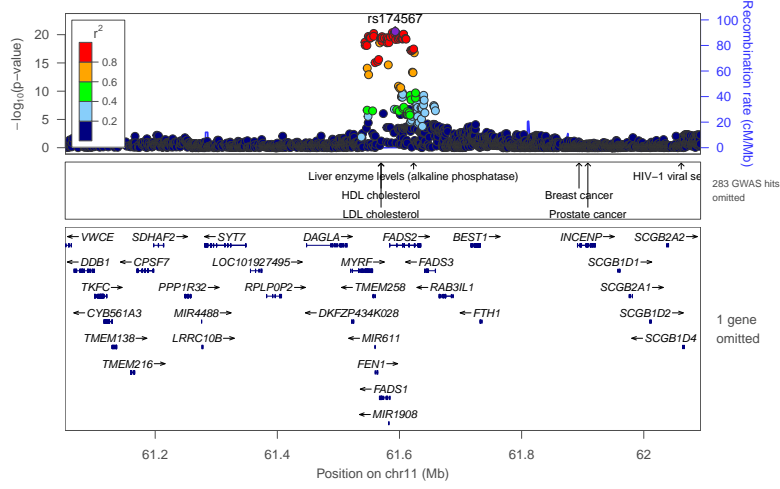

### 1-oleoyl-GPI (18:1)

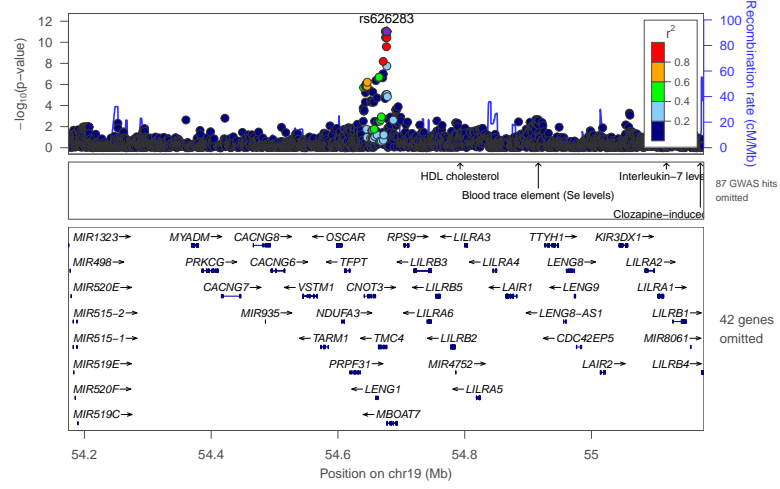

### deoxycarnitine

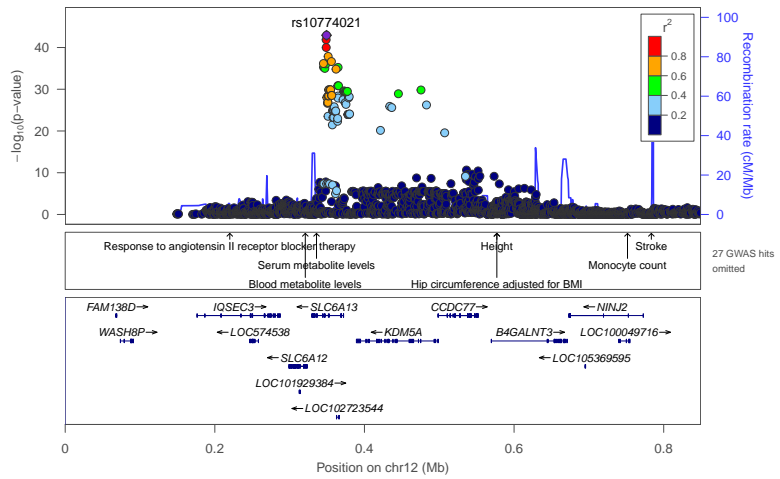

### N6-acetyllysine

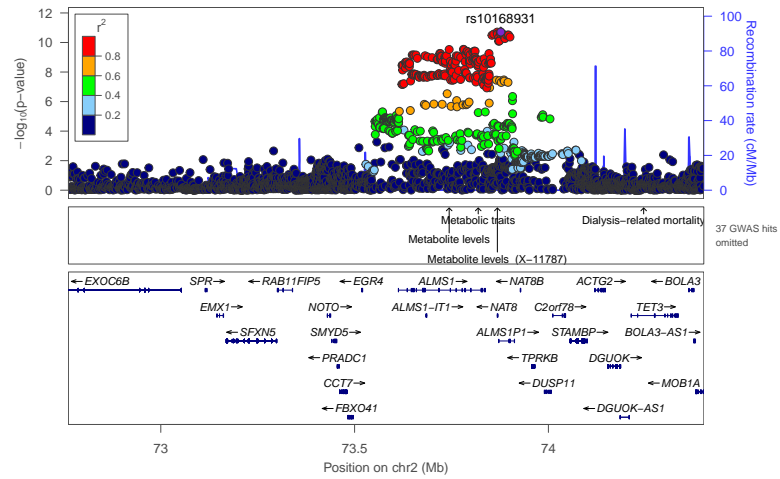

### N6-acetyllysine

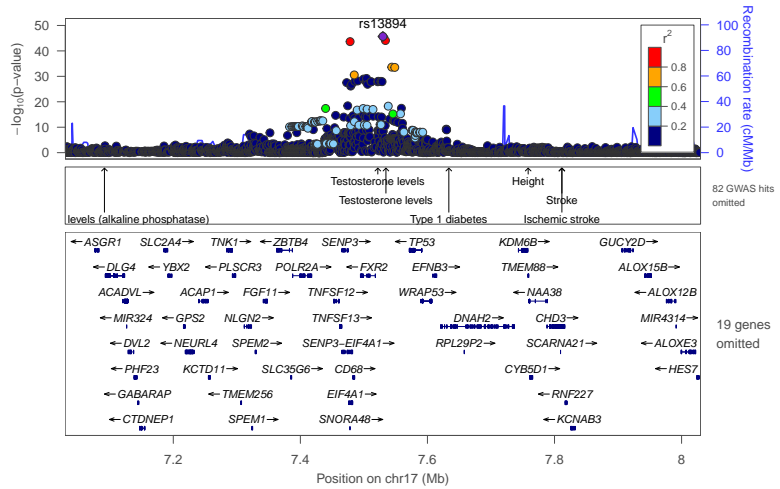

### octadecanedioate (C18-DC)

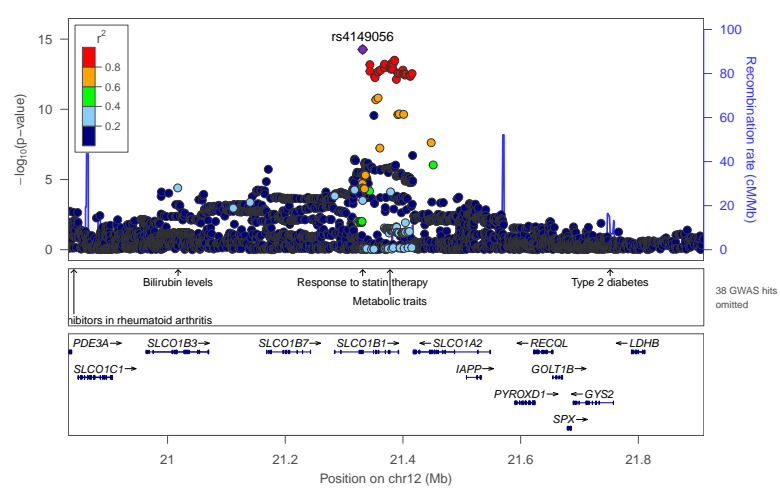



### dimethylarginine (SDMA + ADMA)

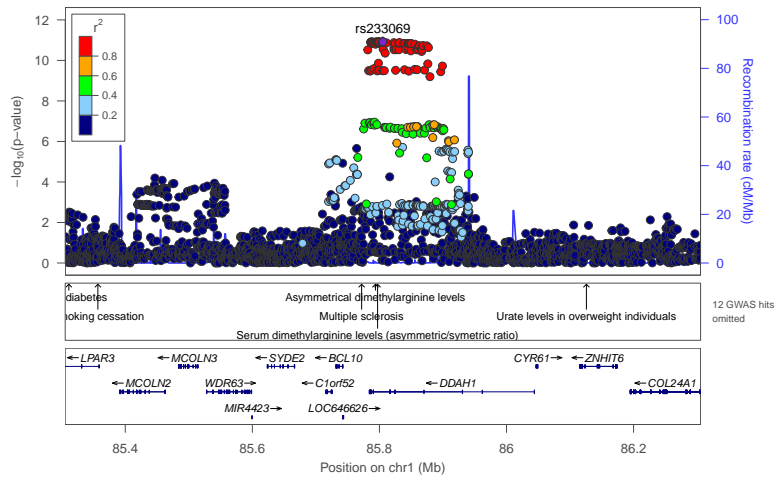

### dimethylarginine (SDMA + ADMA)

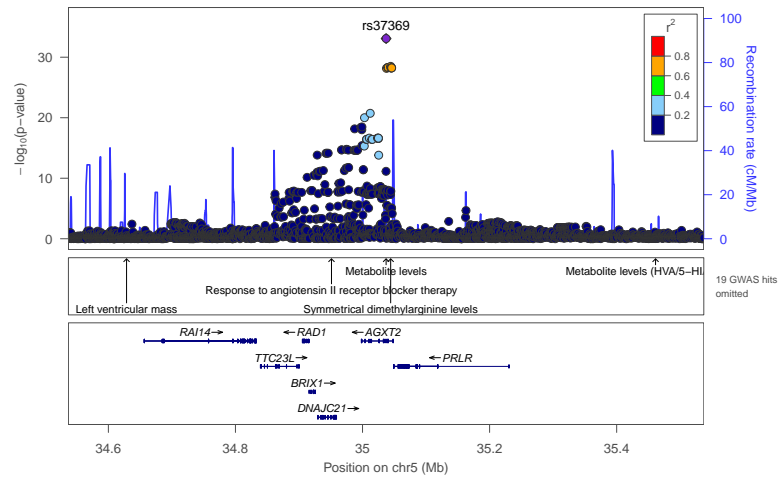

### succinylcarnitine (C4-DC)

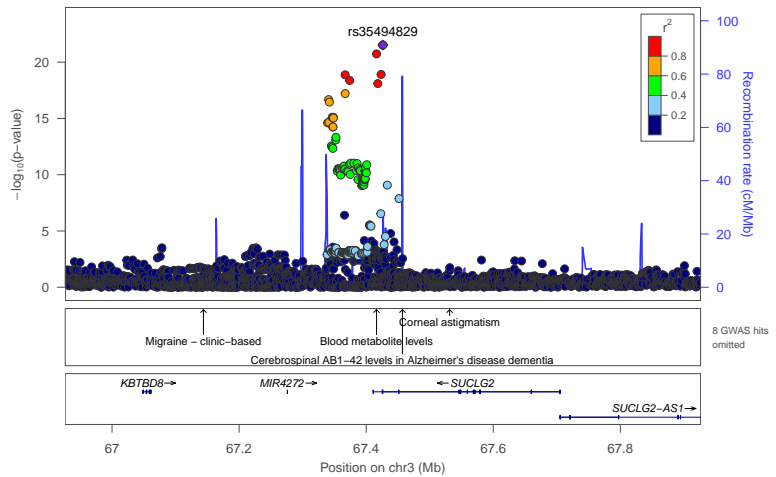

### succinylcarnitine (C4-DC)

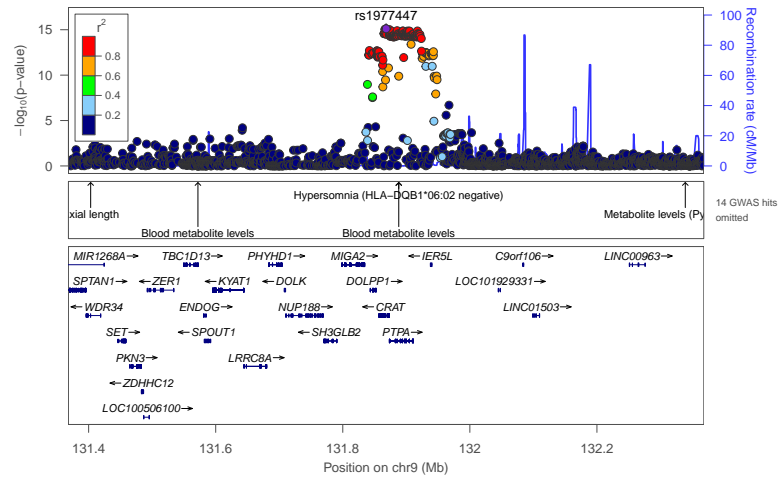

### succinylcarnitine (C4-DC)

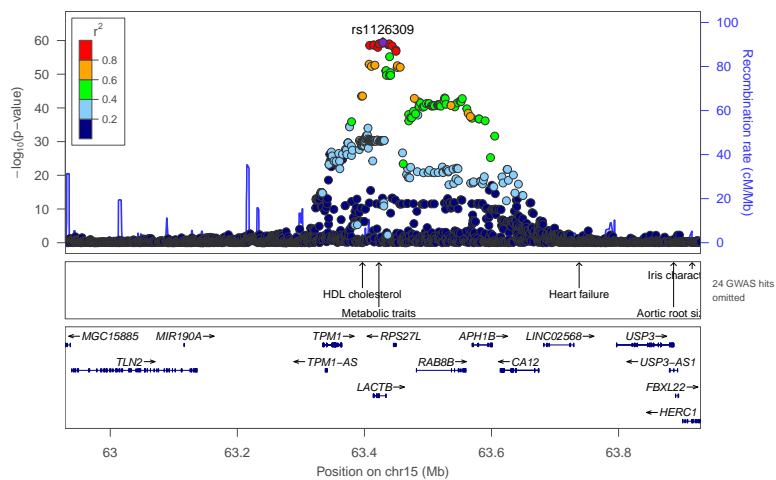

### N-acetylserine

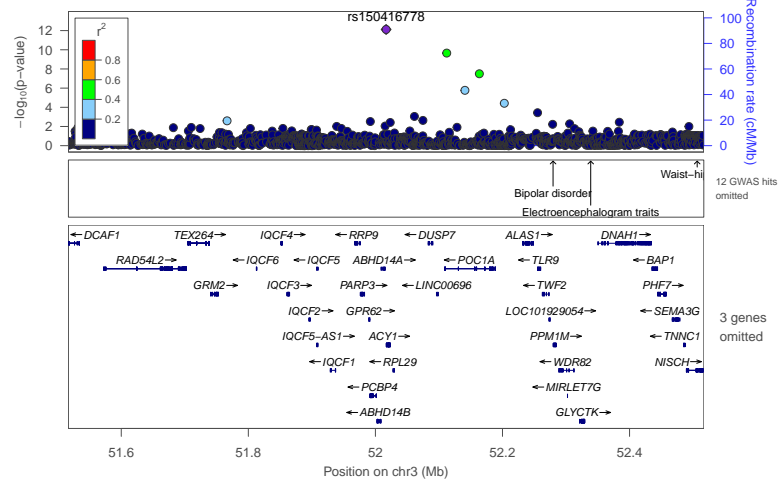



### tryptophan betaine

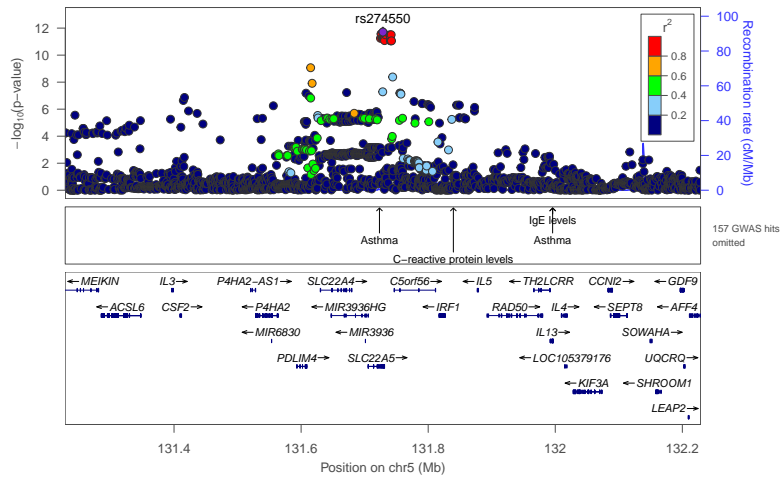

### 5alpha-androstan-3alpha,17alpha-diol monosulfate

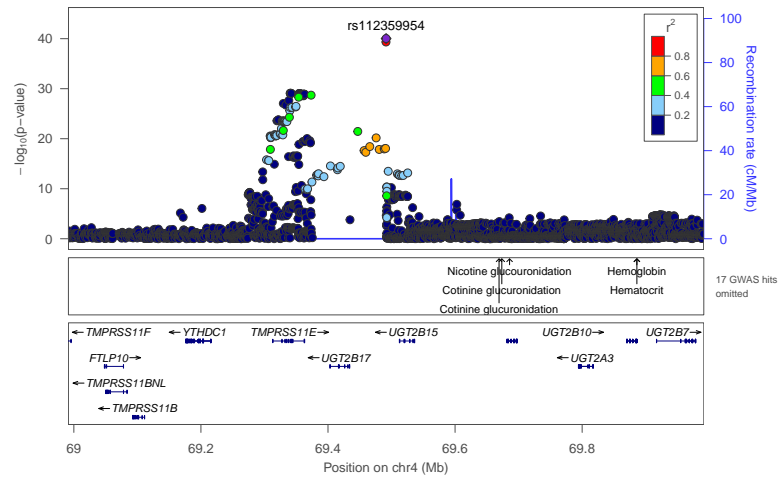

### 5alpha-androstan-3alpha,17alpha-diol monosulfate

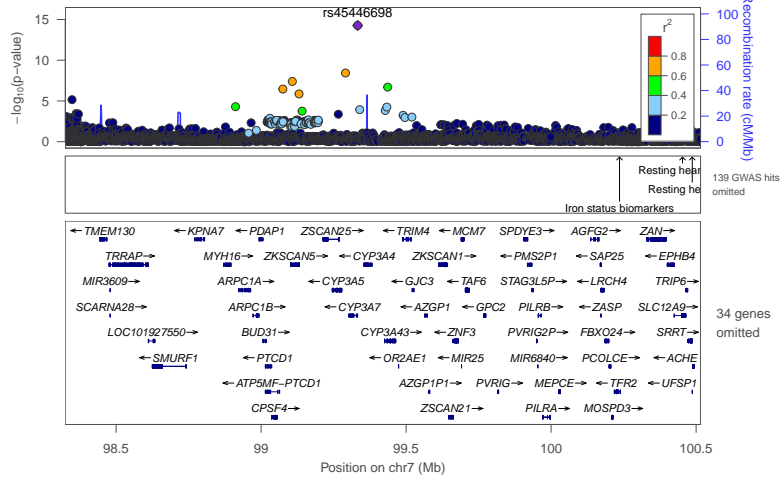

### 5alpha-androstan-3alpha,17beta-diol disulfate

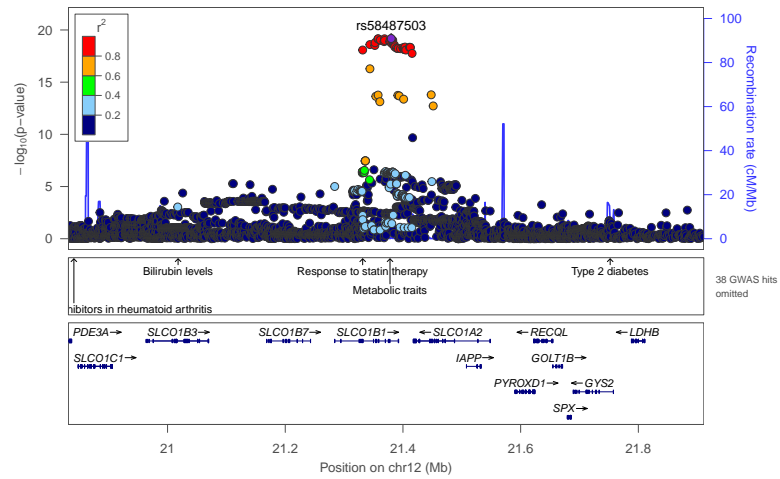

### 5alpha-androstan-3alpha,17beta-diol monosulfate (2)

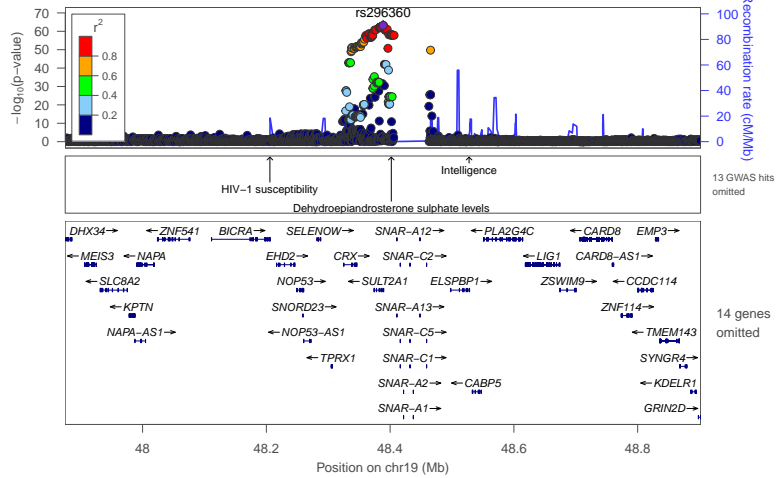

### 5alpha-androstan-3alpha,17beta-diol monosulfate (1)

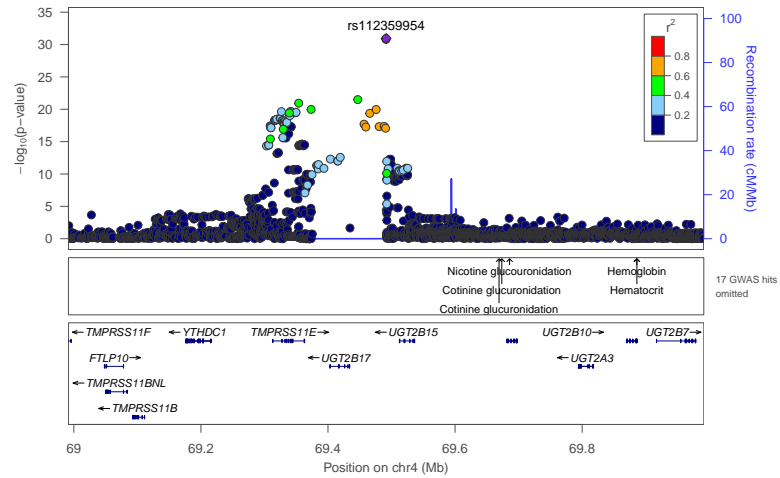

5alpha-androstan-3alpha,17beta-diol monosulfate (1)

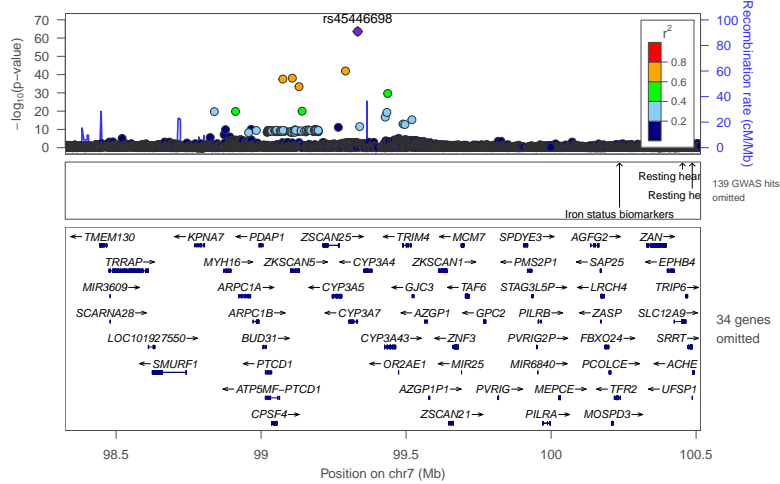

5alpha-androstan-3beta,17beta-diol disulfate

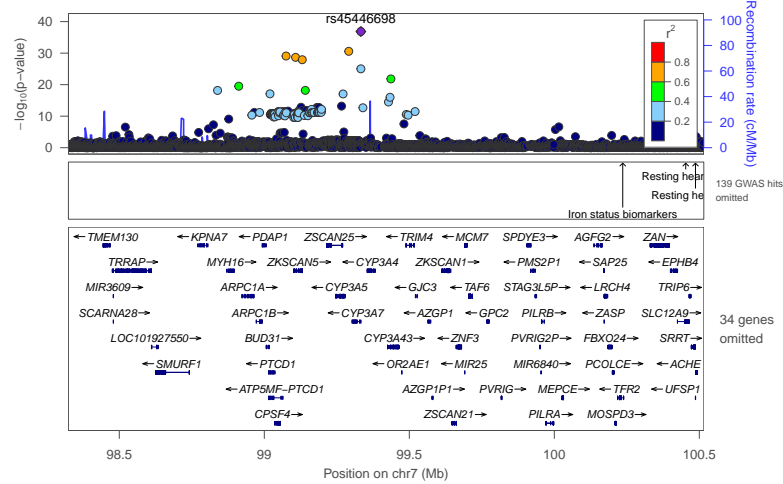

5alpha-androstan-3beta,17beta-diol disulfate

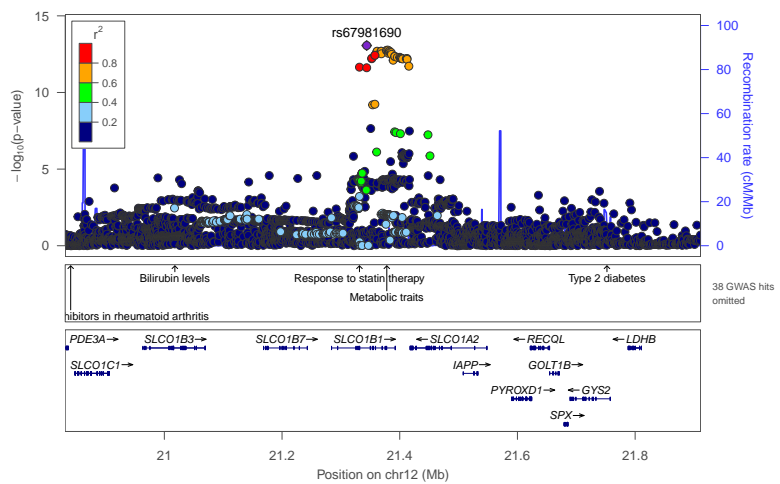

5alpha-androstan-3beta,17beta-diol disulfate

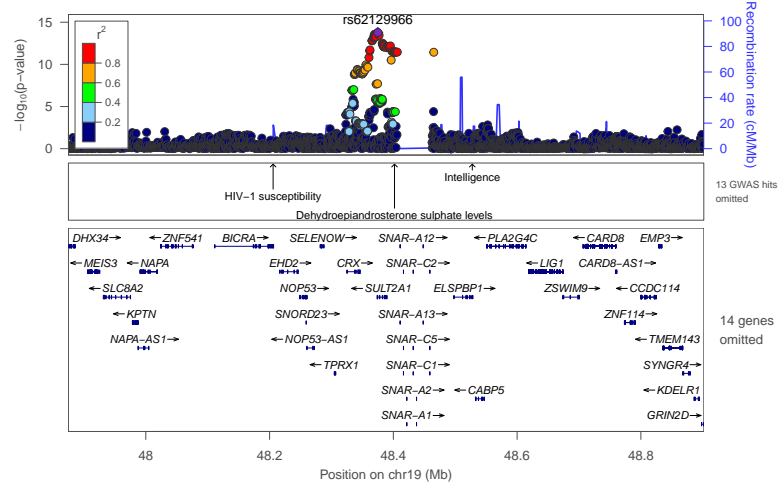

5alpha-androstan-3beta,17beta-diol monosulfate (2)

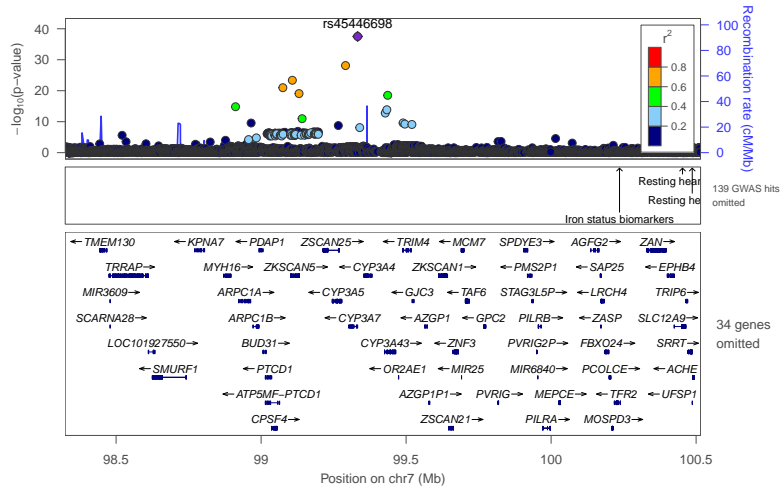

5alpha-pregnan-3beta,20beta-diol monosulfate (1)

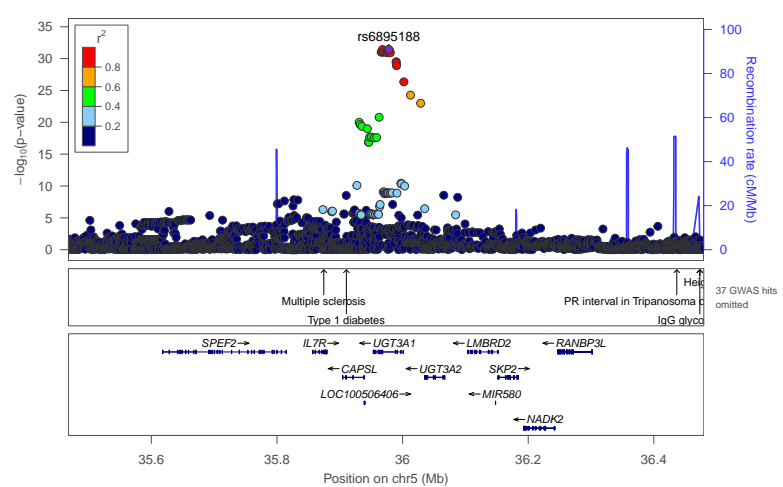

### 5alpha-pregnan-3beta,20alpha-diol disulfate

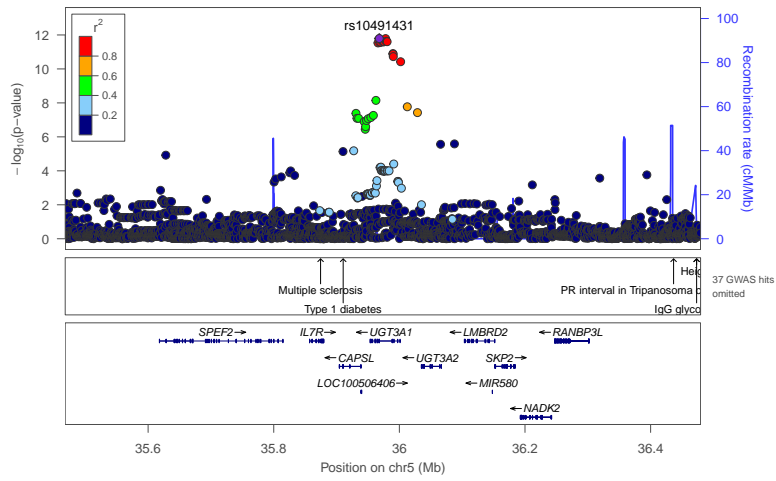

### 5alpha-pregnan-3beta,20alpha-diol disulfate

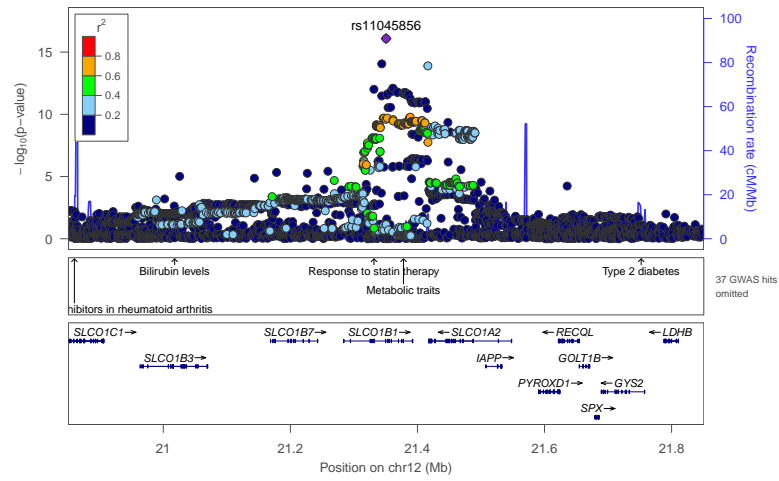

### 5alpha-pregnan-3beta,20alpha-diol disulfate

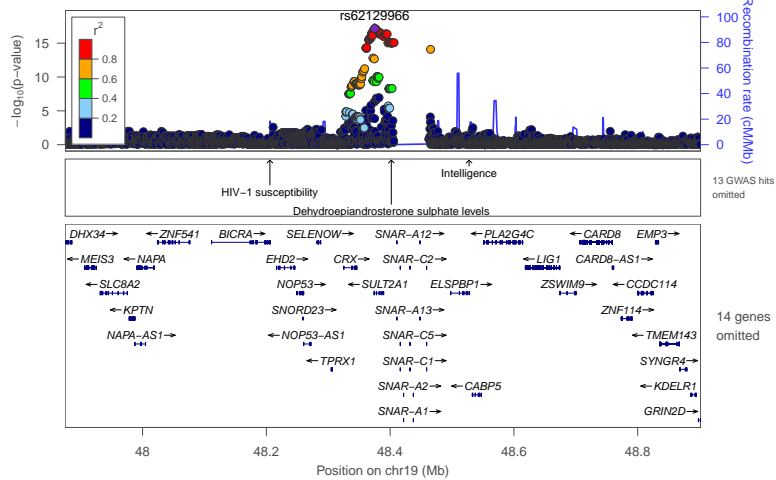

### 5alpha-pregnan-3beta,20alpha-diol monosulfate (2)

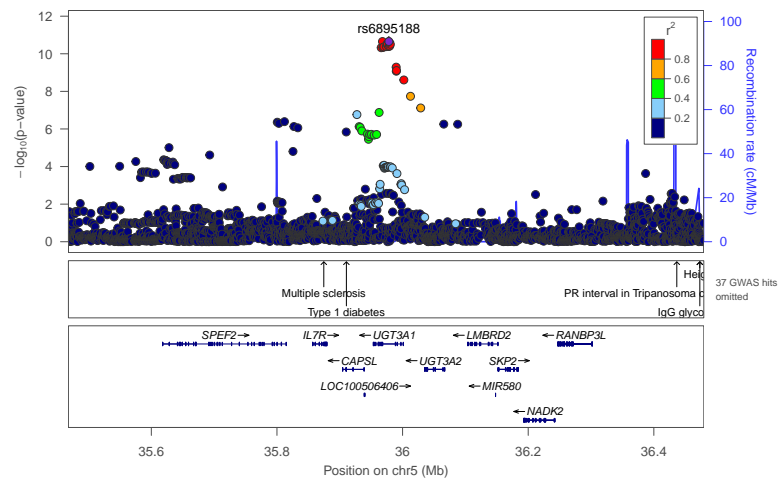

### androstenediol (3beta,17beta) disulfate (1)

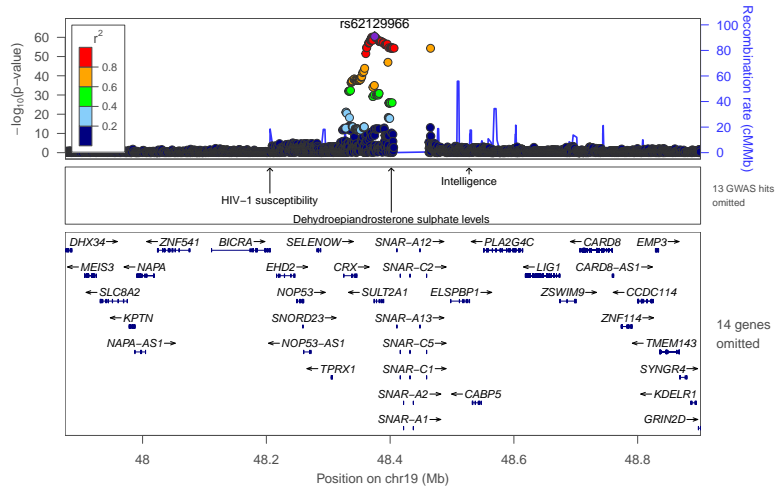

### androstenediol (3beta,17beta) disulfate (2)

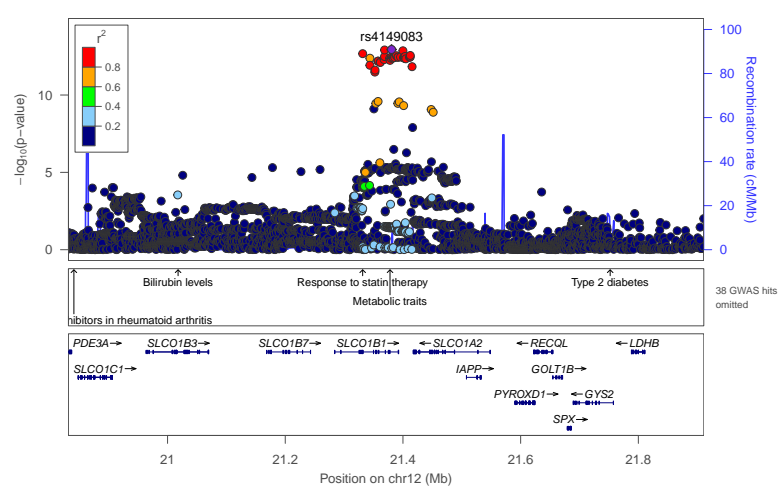

androstenediol (3alpha, 17alpha) monosulfate (2)

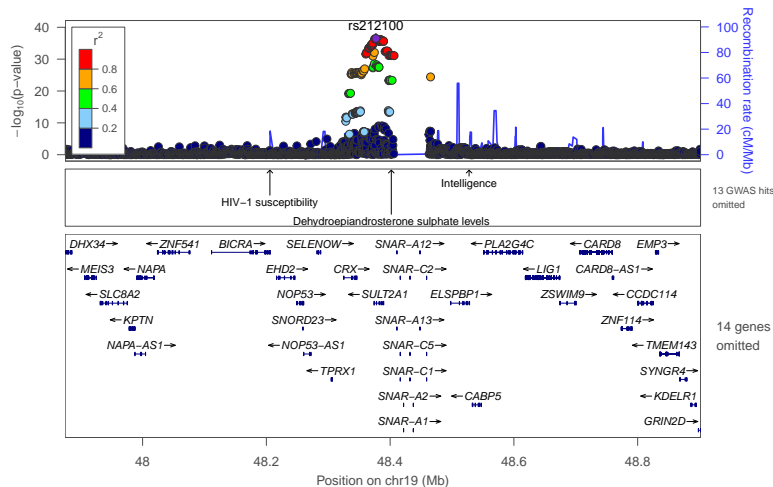

androstenediol (3alpha, 17alpha) monosulfate (3)

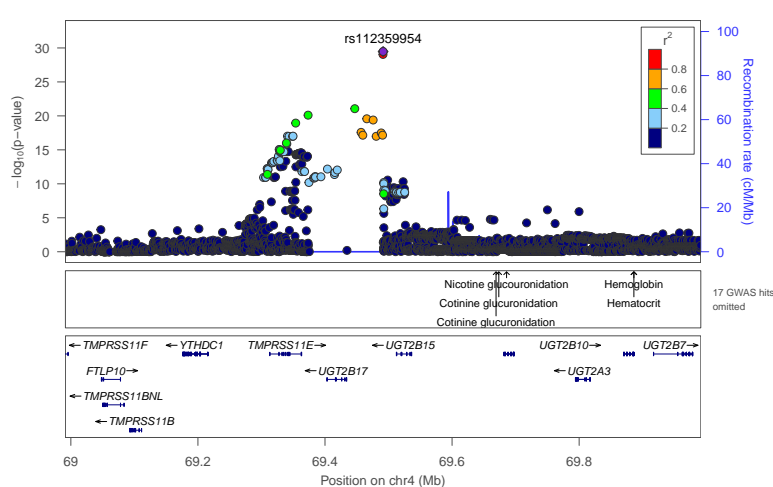

androstenediol (3alpha, 17alpha) monosulfate (3)

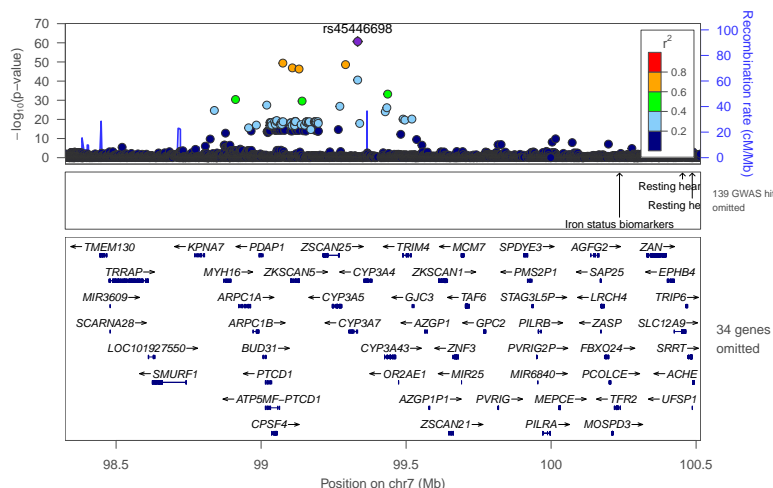

androstenediol (3alpha, 17alpha) monosulfate (3)

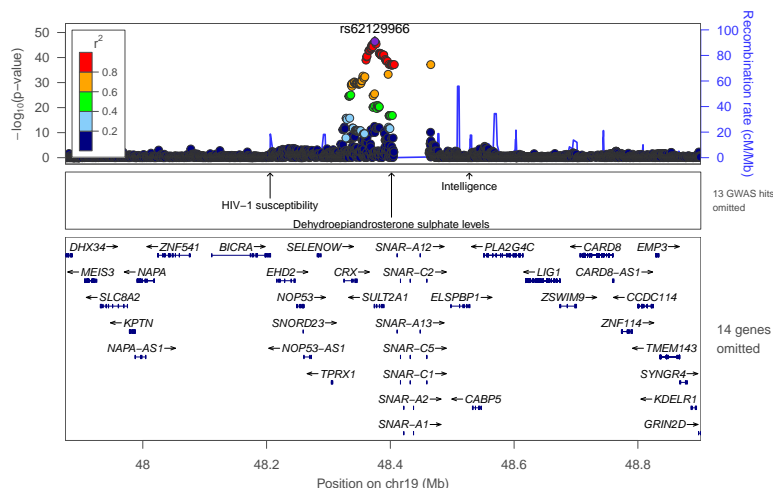

androstenediol (3beta, 17beta) monosulfate (1)

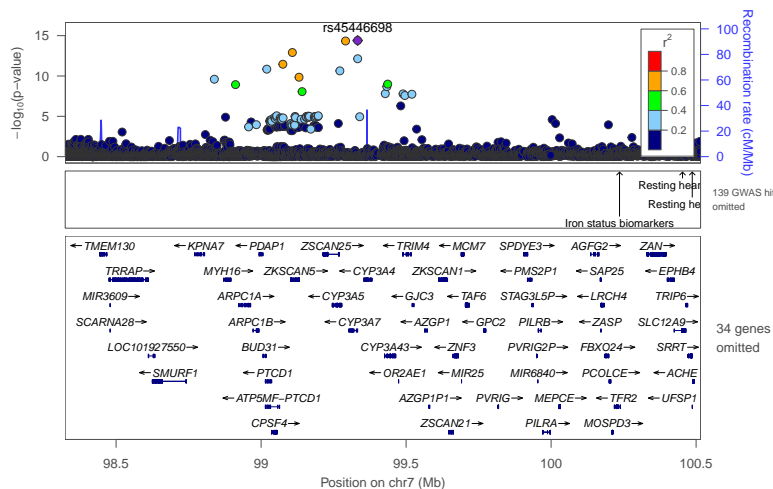

N-acetyl-beta-alanine

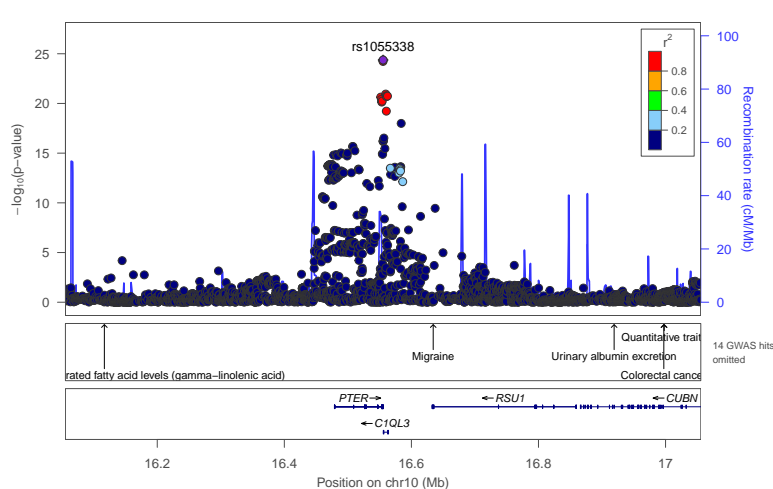

### ergothioneine

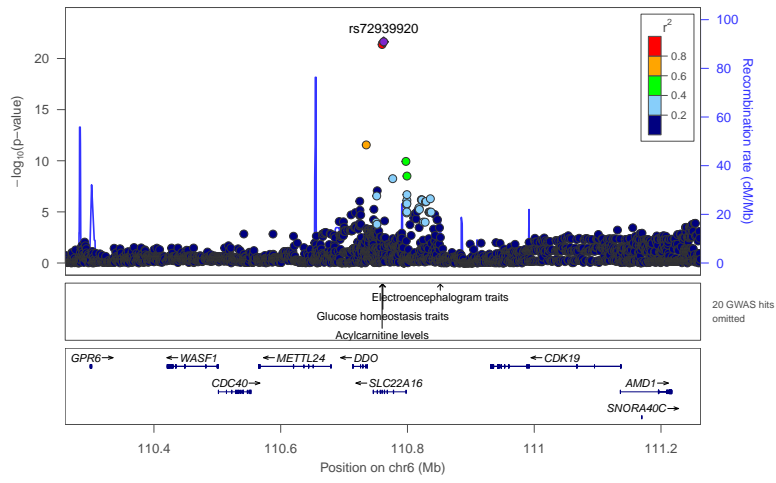

### N-acetylputrescine

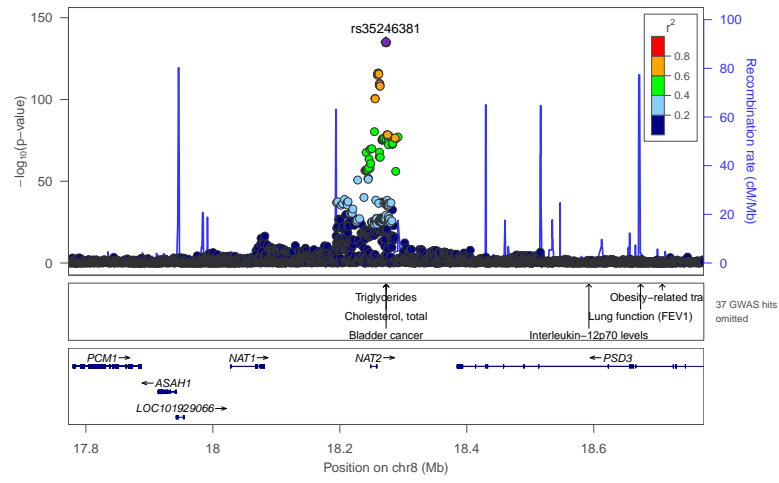

### N-acetylputrescine

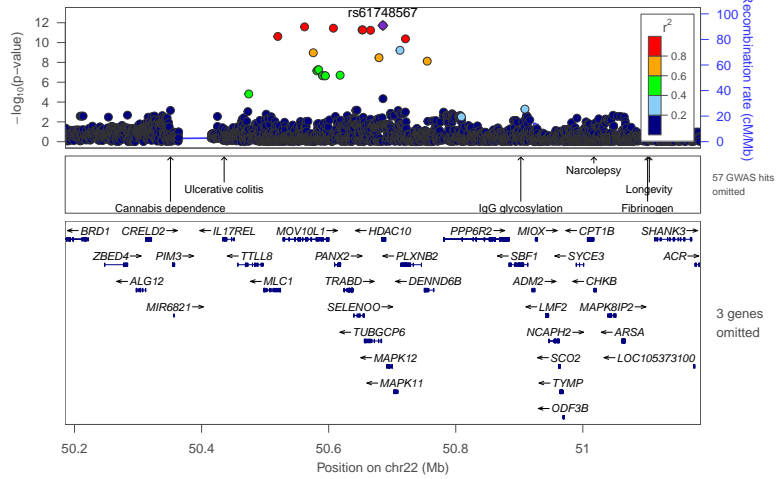

### sphingomyelin (d18:1/18:1, d18:2/18:0)

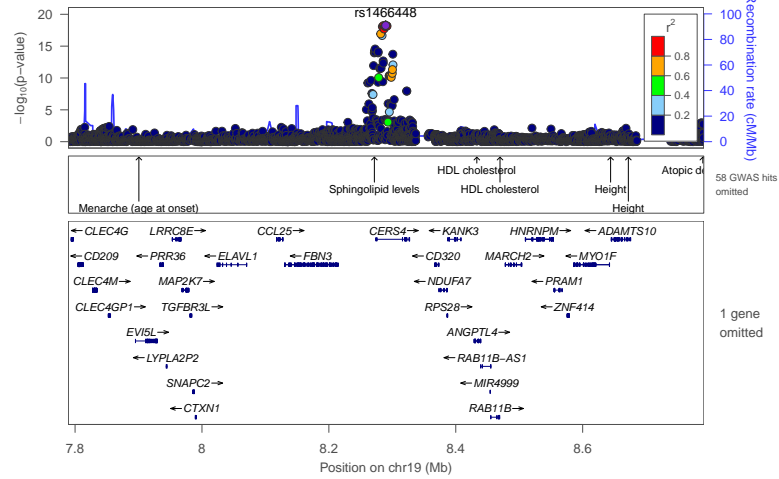

### oleoyl ethanolamide

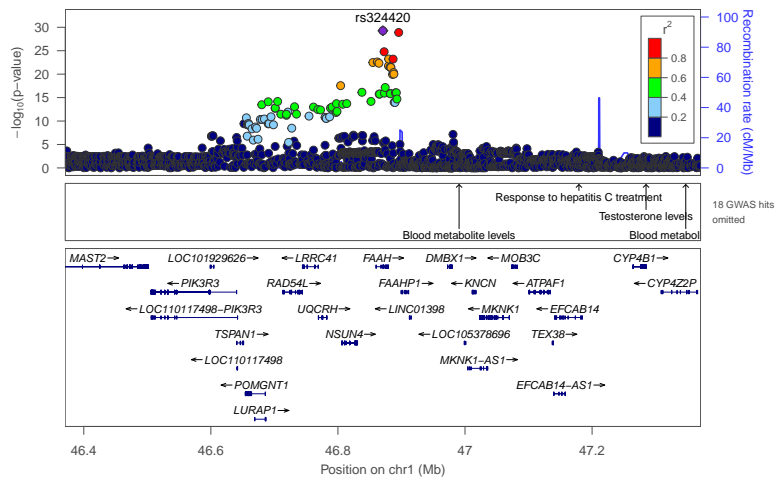

### palmitoyl ethanolamide

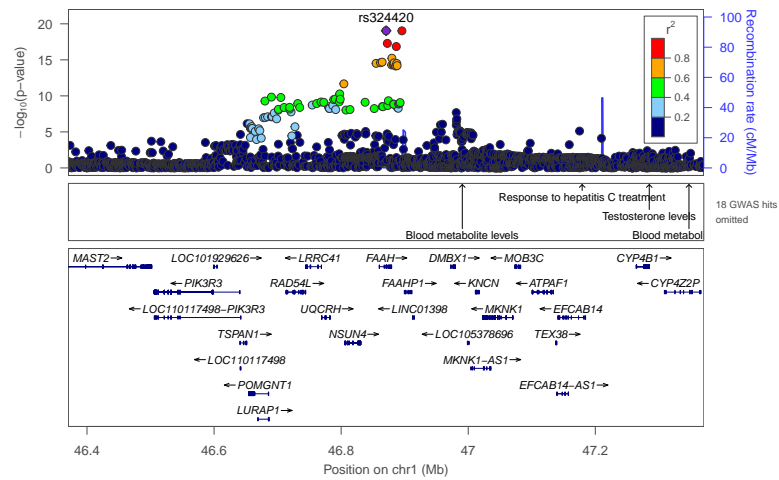

### 16α-hydroxy DHEA 3-sulfate

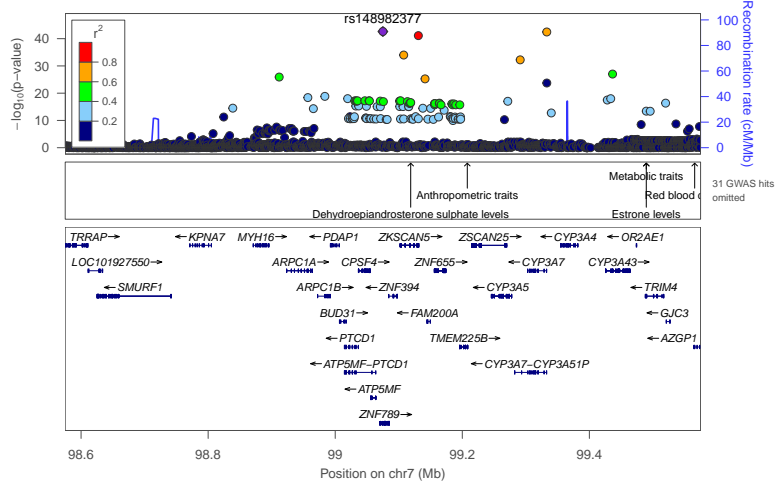

### cis-4-decenoylcarnitine (C10:1)

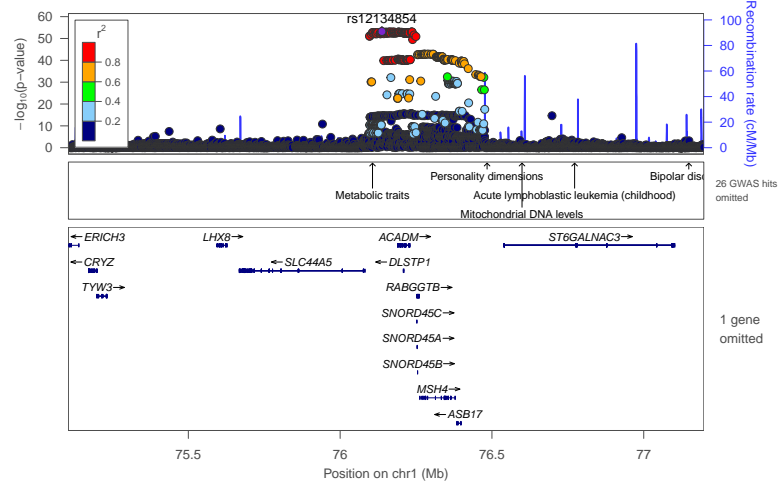

### S-methylcysteine

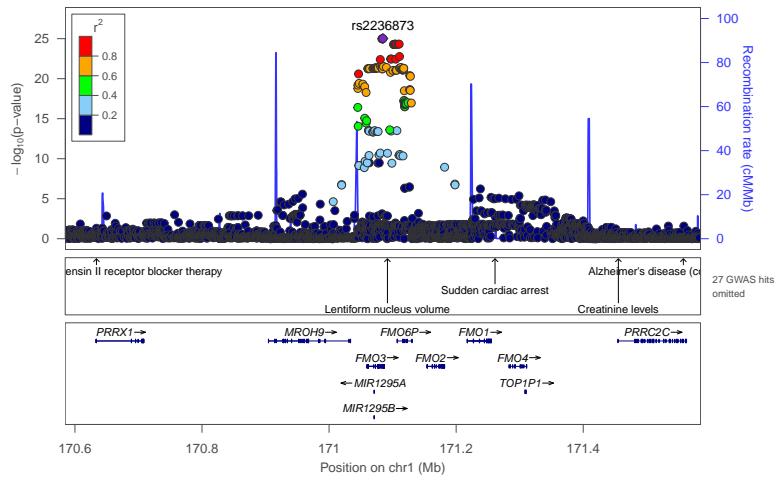

### N-oleoyltaurine

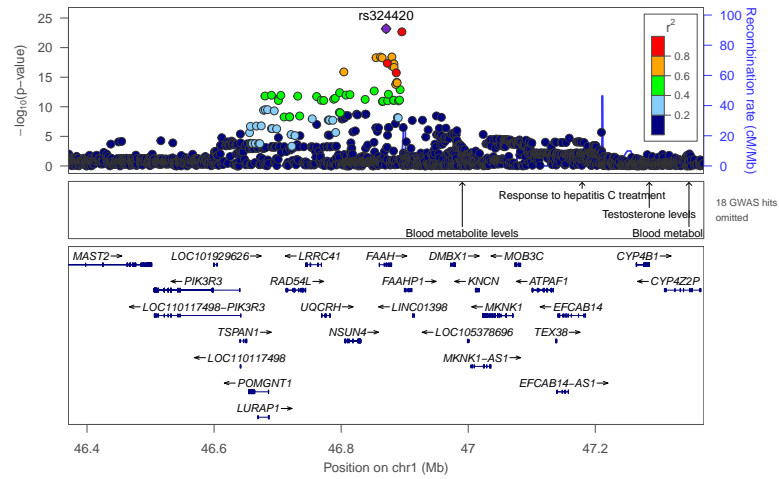

### solanidine

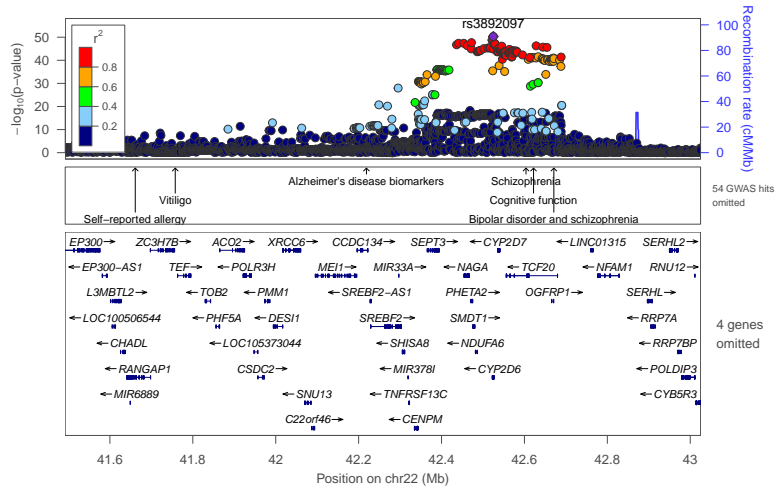

### eicosanedioate (C20-DC)

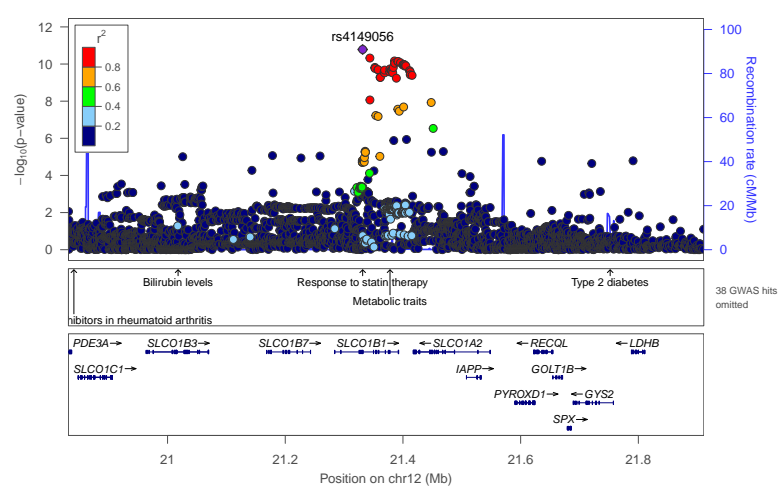



### carboxyethyl-GABA

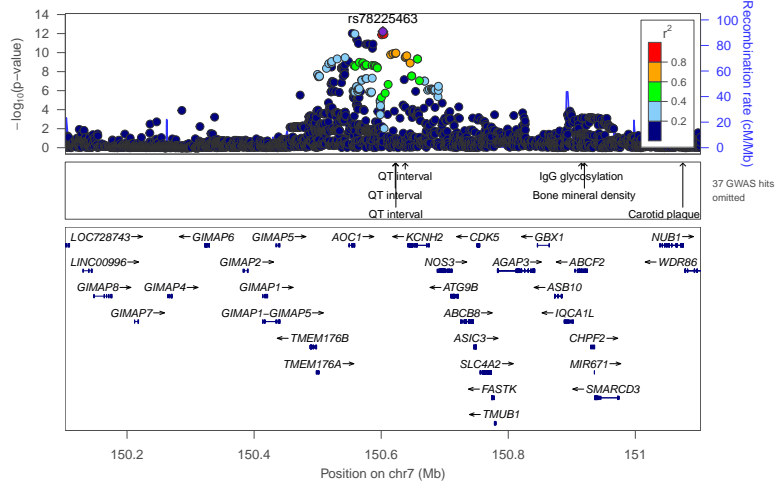

### hydantoin-5-propionate

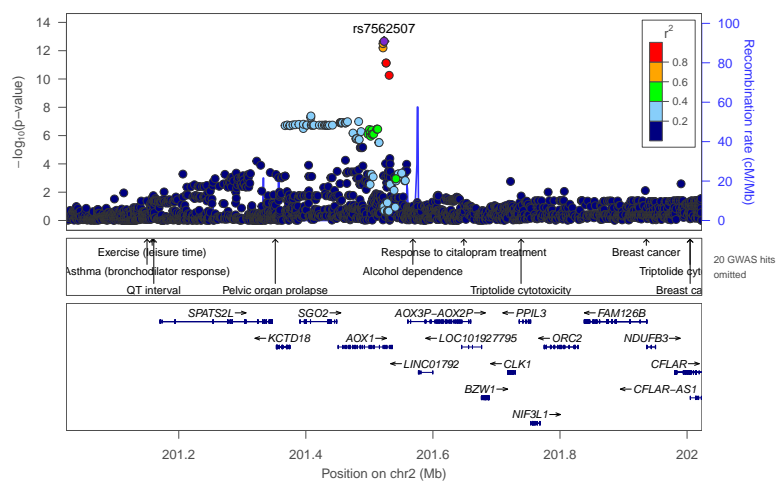

### 4-hydroxyglutamate

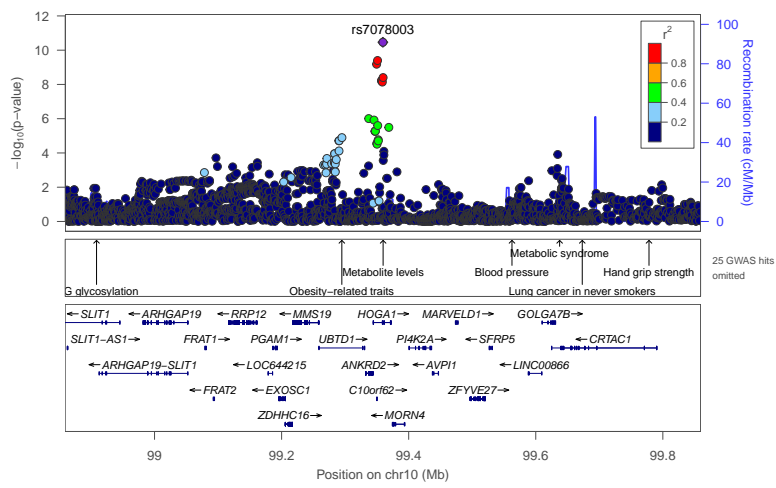

### polyglycine

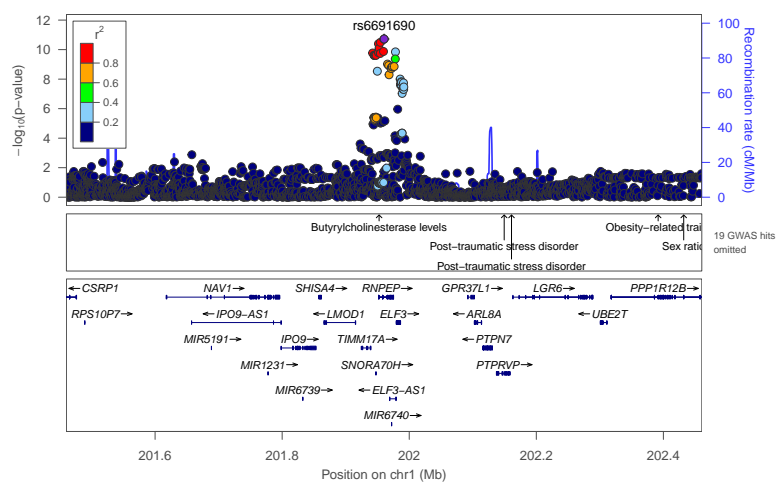

### pregnenediol-3-glucuronide

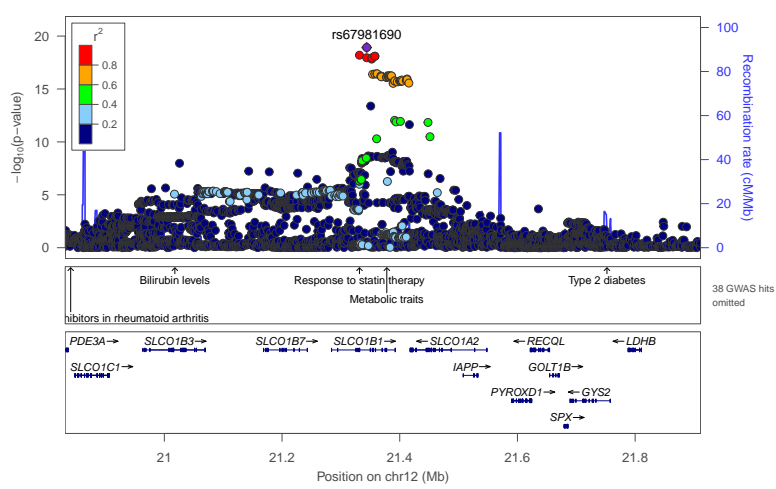

### alliin

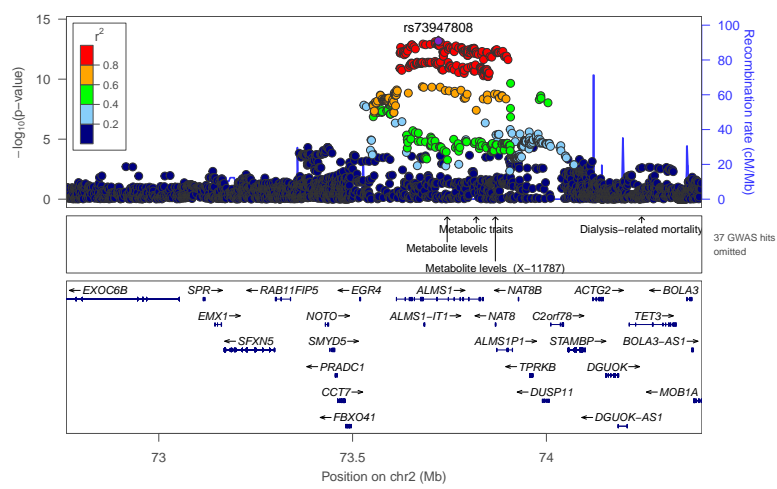

### indoleacetylglutamine

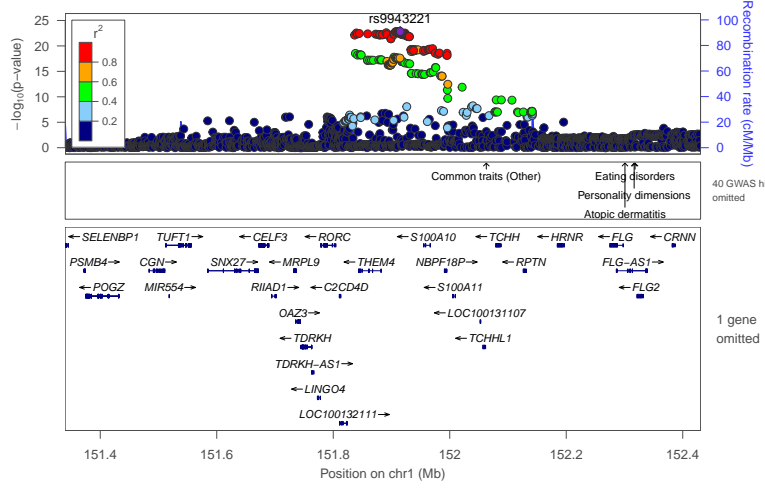

### indoleacetylglutamine

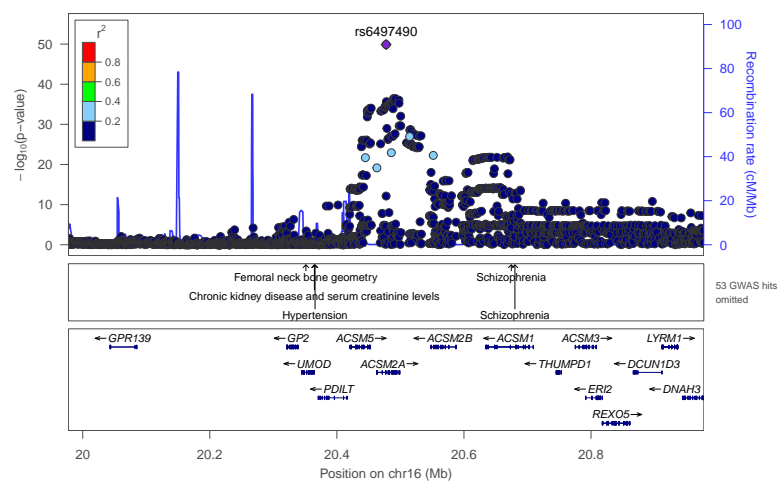

### N-palmitoylglycine

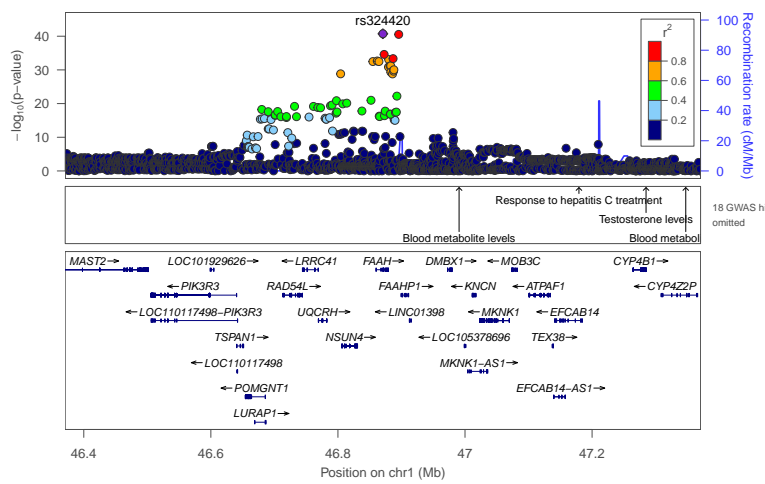

### N-palmitoylglycine

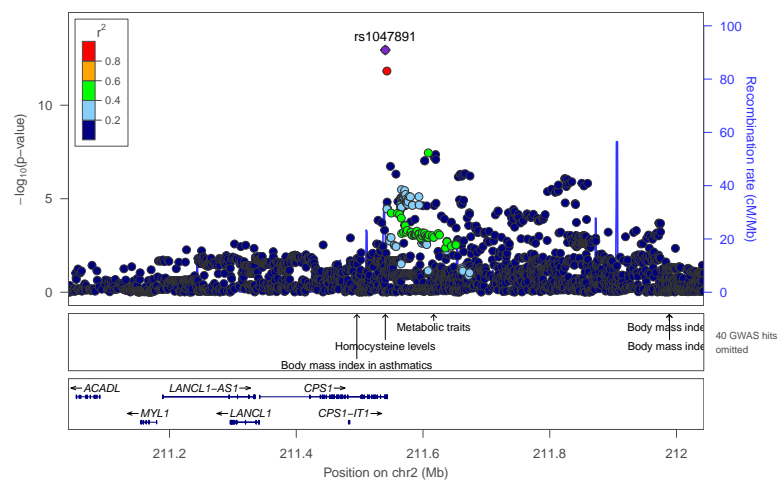

### S-1-pyrroline-5-carboxylate

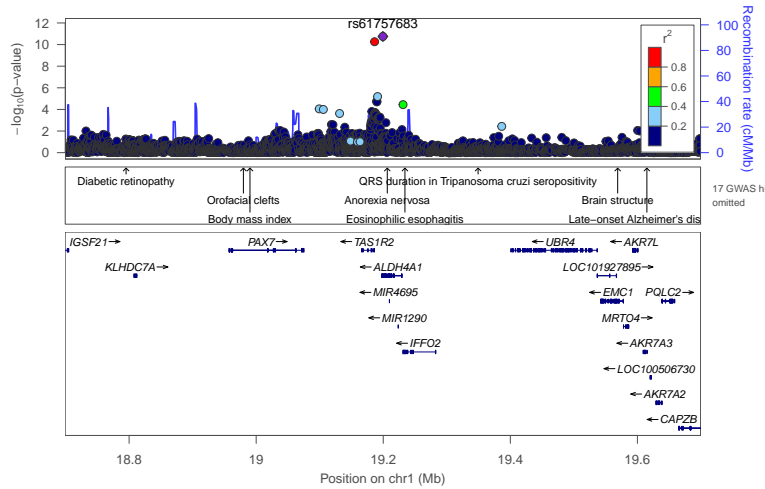

### S-1-pyrroline-5-carboxylate

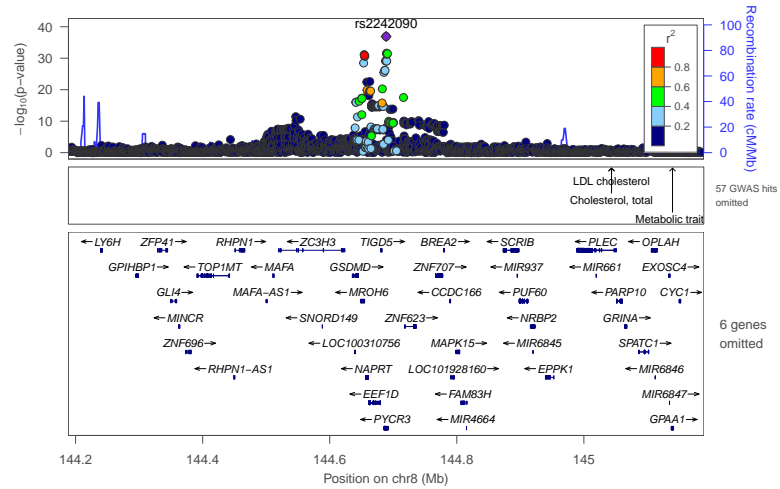

### 2-aminobutyrate

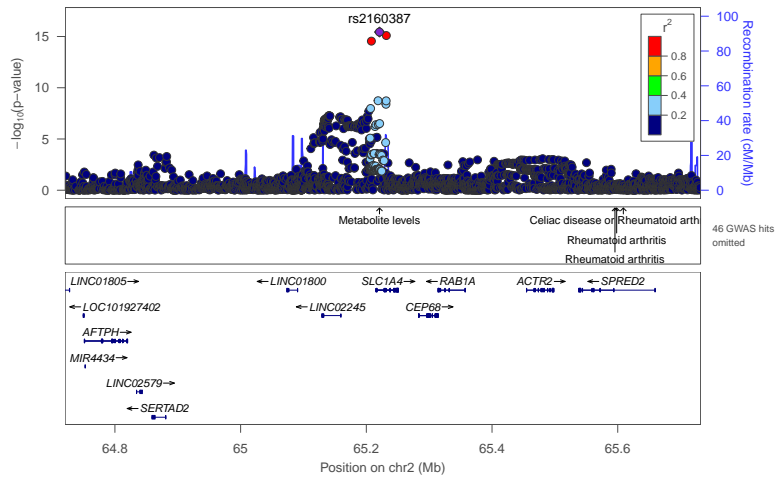

### S-adenosylhomocysteine (SAH)

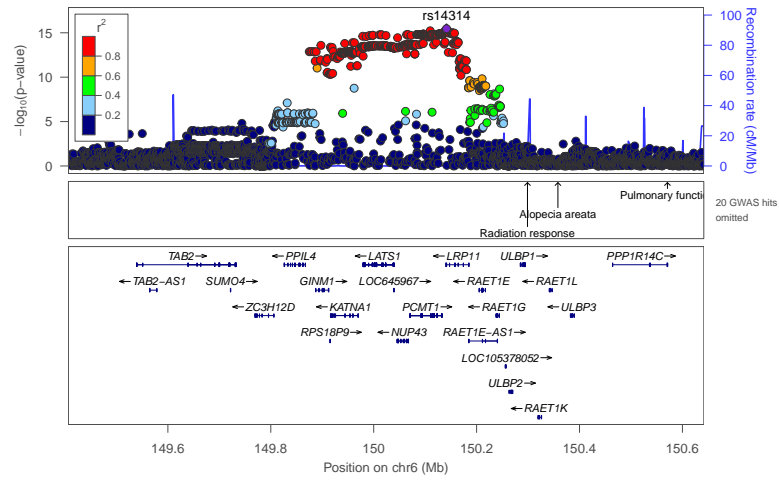

### 1-stearoyl-GPE (18:0)

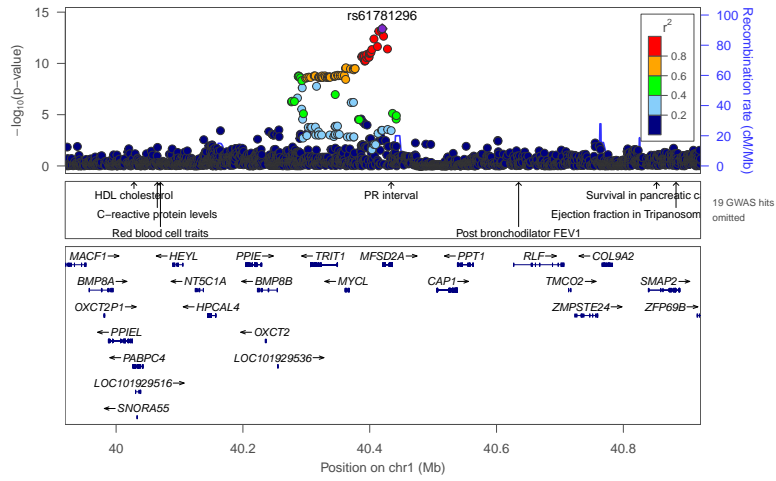

### 1-stearoyl-GPE (18:0)

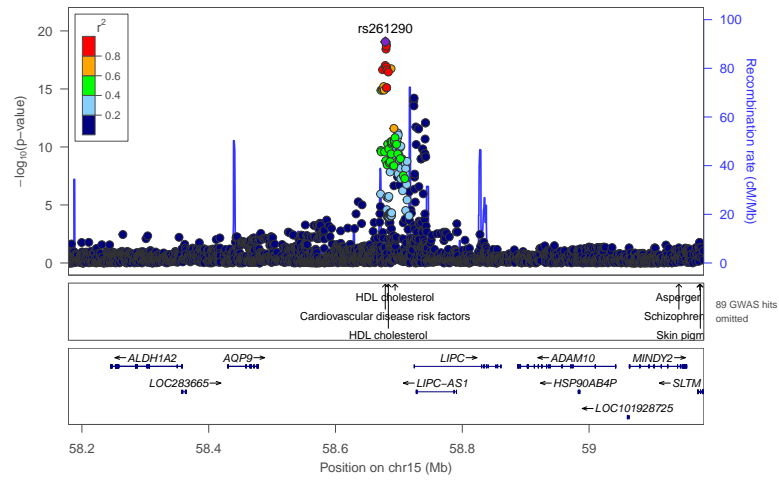

### erythronate\*

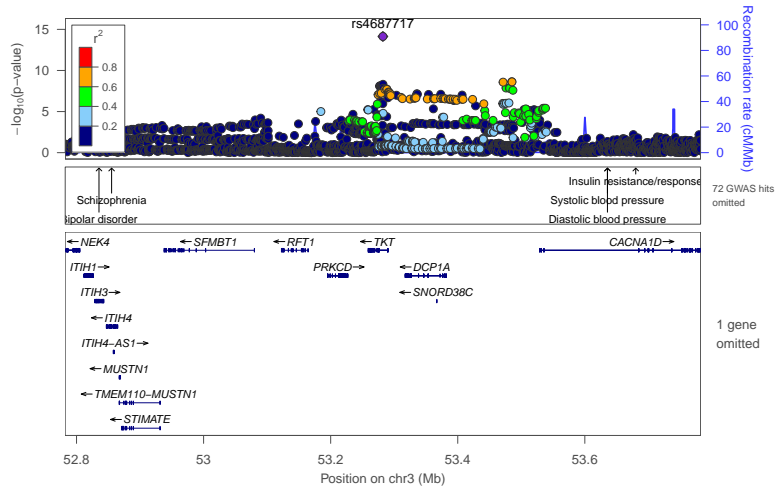

### 1-palmitoyl-2-linoleoyl-GPC (16:0/18:2)

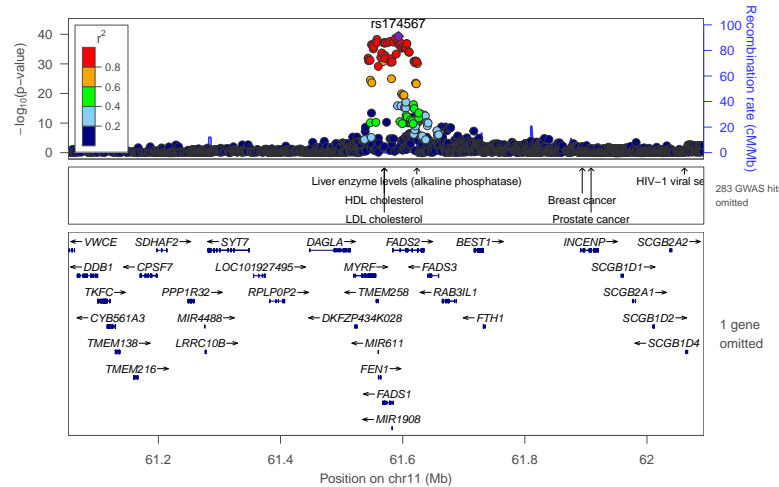

1-stearoyl-2-oleoyl-GPE (18:0/18:1)

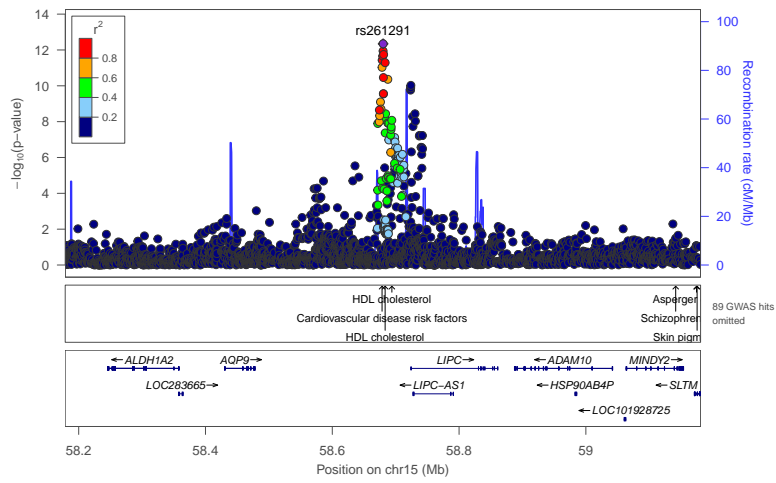

1-palmitoyl-2-linoleoyl-GPE (16:0/18:2)

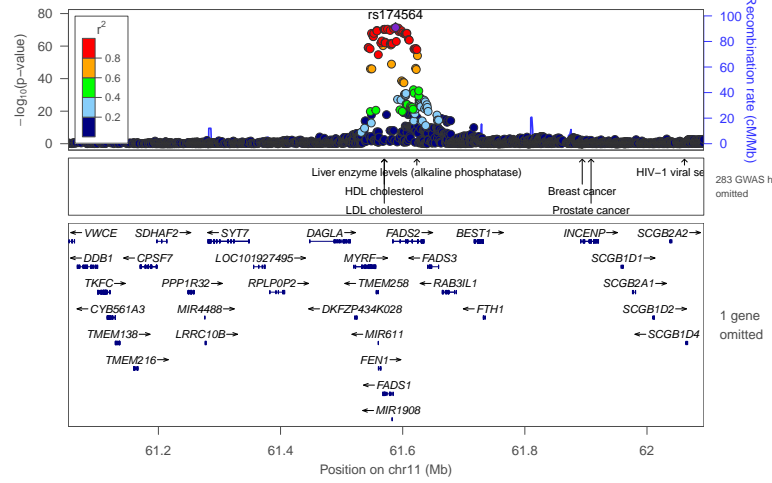

1-palmitoyl-2-linoleoyl-GPE (16:0/18:2)

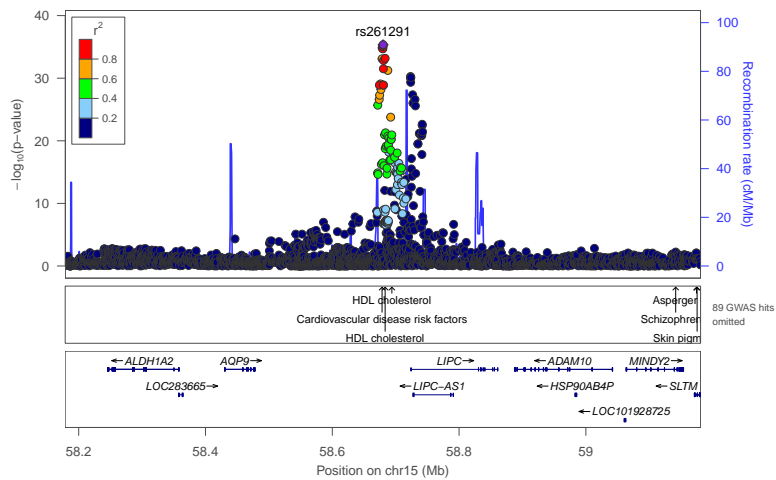

1-stearoyl-2-arachidonoyl-GPC (18:0/20:4)

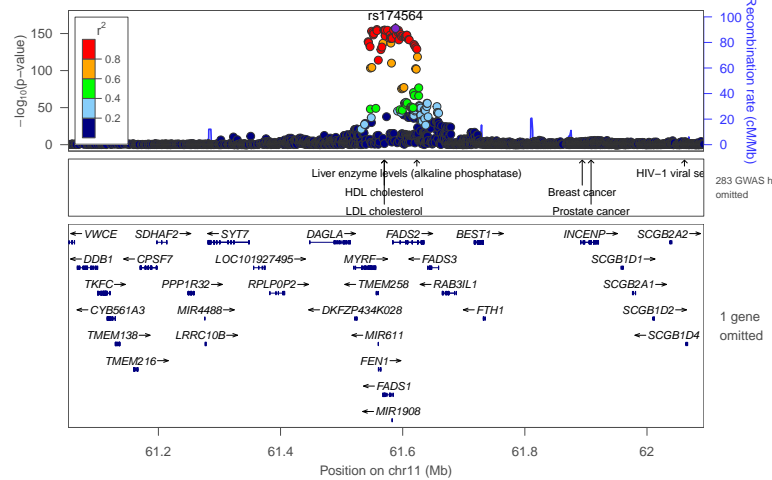

sphingomyelin (d18:1/14:0, d16:1/16:0)\*

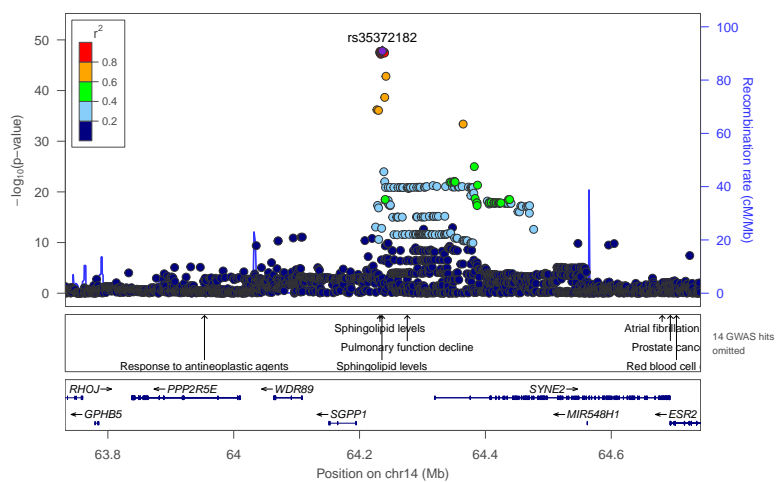

6-oxopiperidine-2-carboxylate

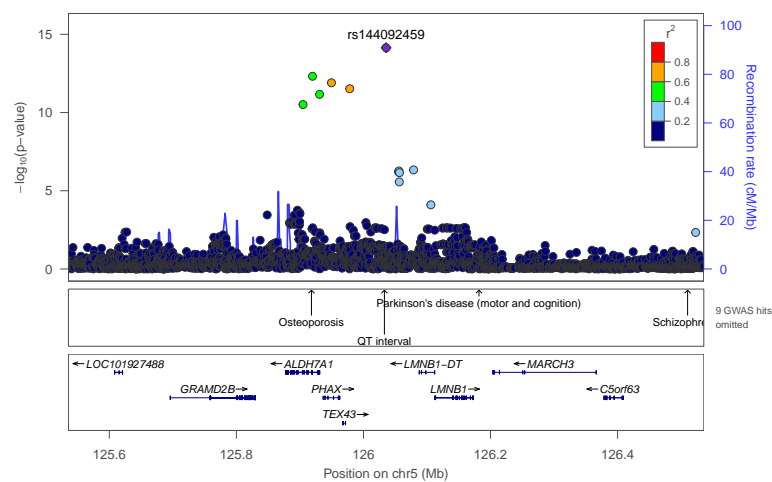

### 6-oxopiperidine-2-carboxylate

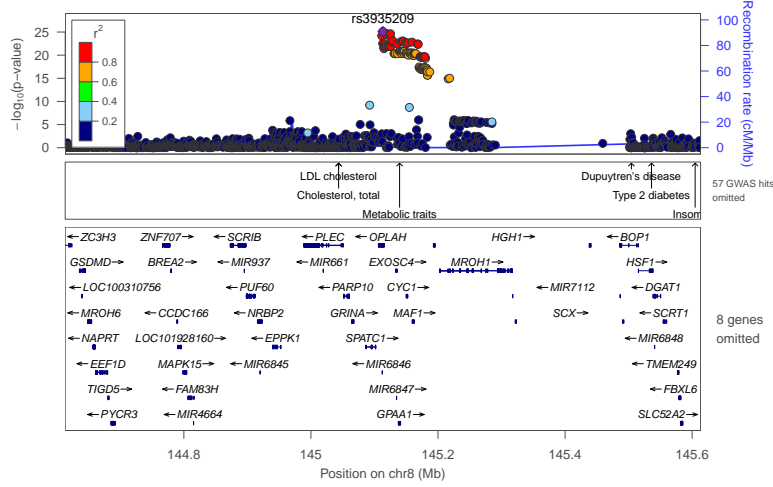

### N-delta-acetylornithine

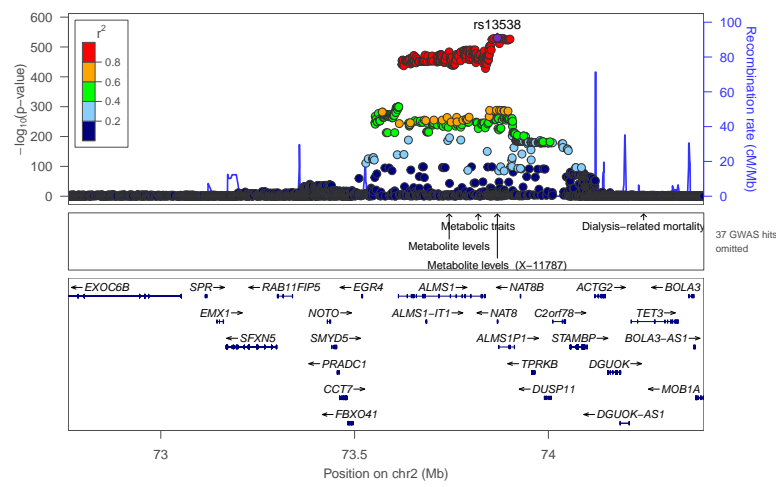

### N-acetyl-1-methylhistidine\*

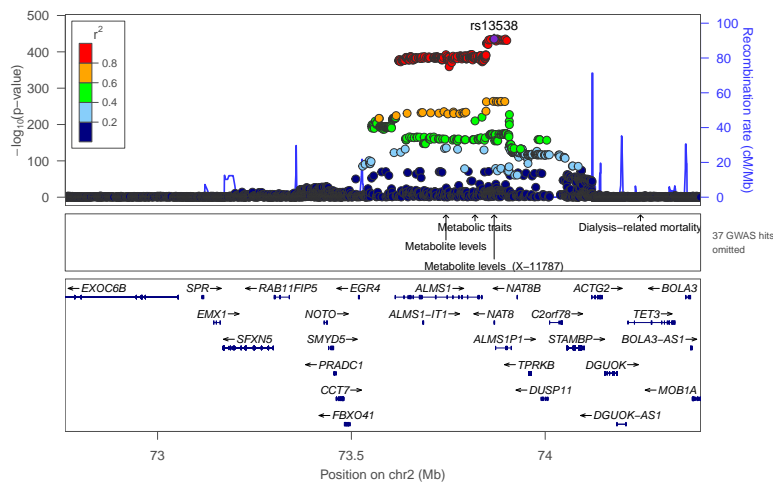

### N-acetyl-3-methylhistidine\*

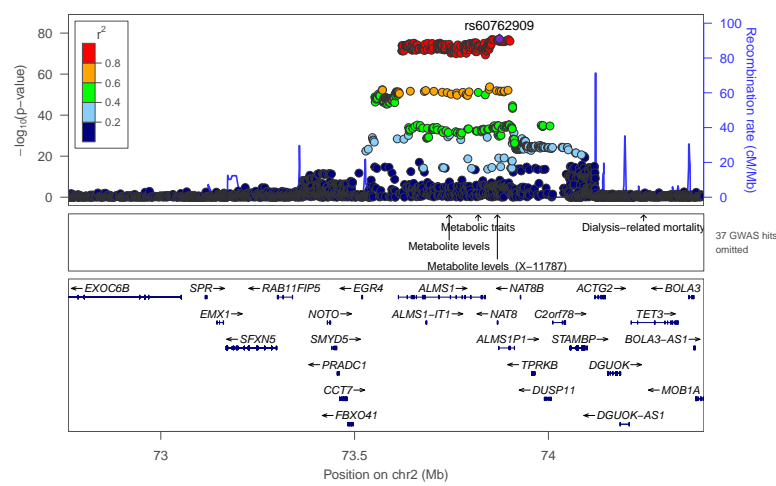

### acisoga

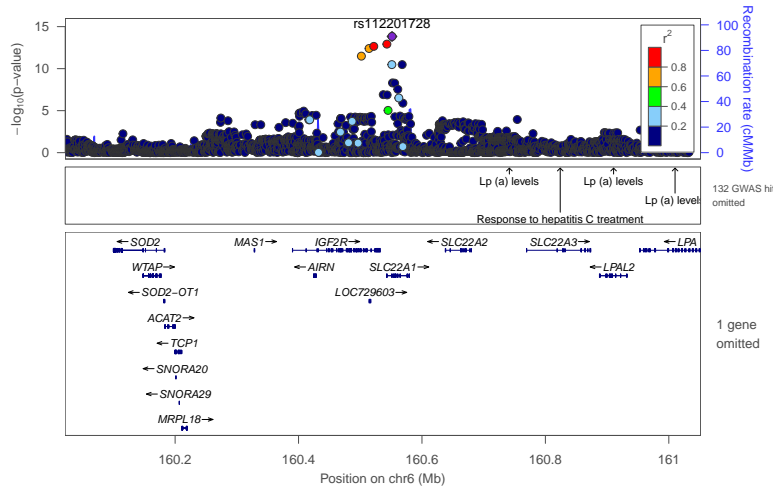

### acisoga

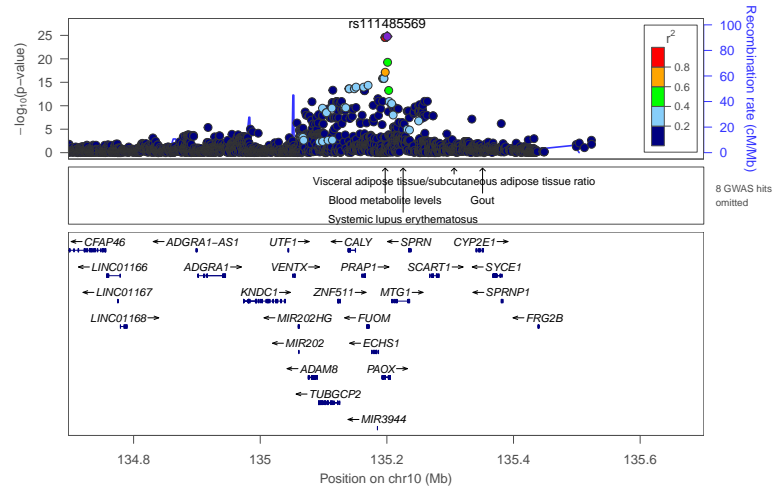

### 2-aminooctanoate

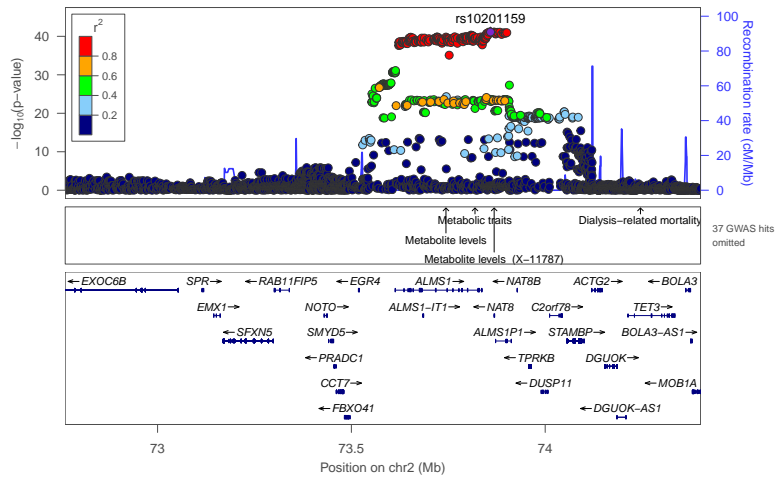

### N-acetylcarnosine

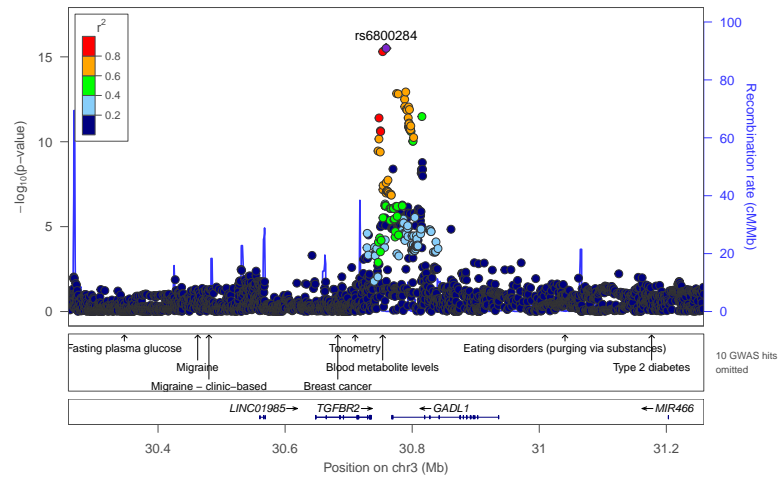

### N-acetylcarnosine

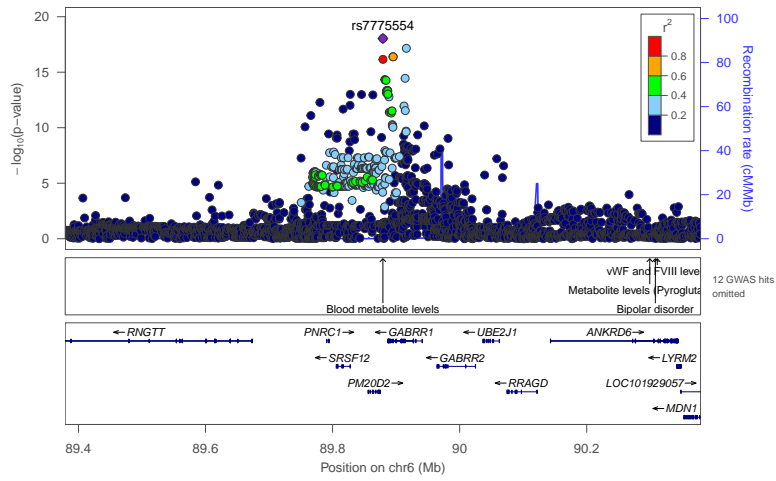

### N-acetylcarnosine

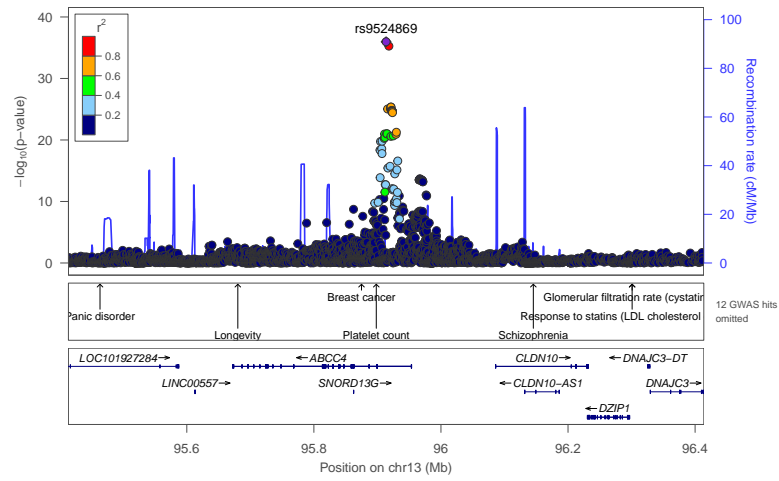

### N-formylanthranilic acid

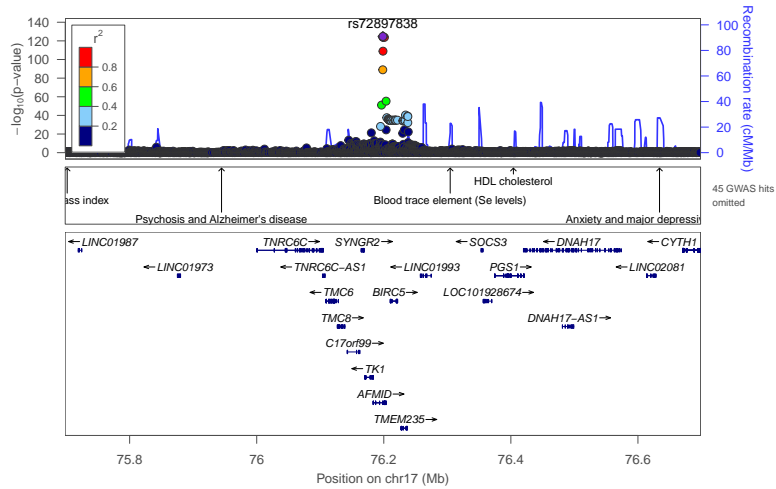

### N2,N5-diacetylornithine

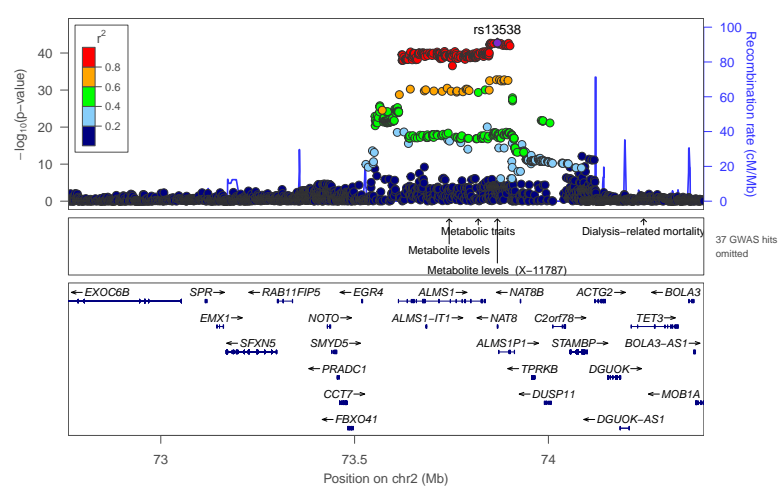



### bilirubin (Z,Z)

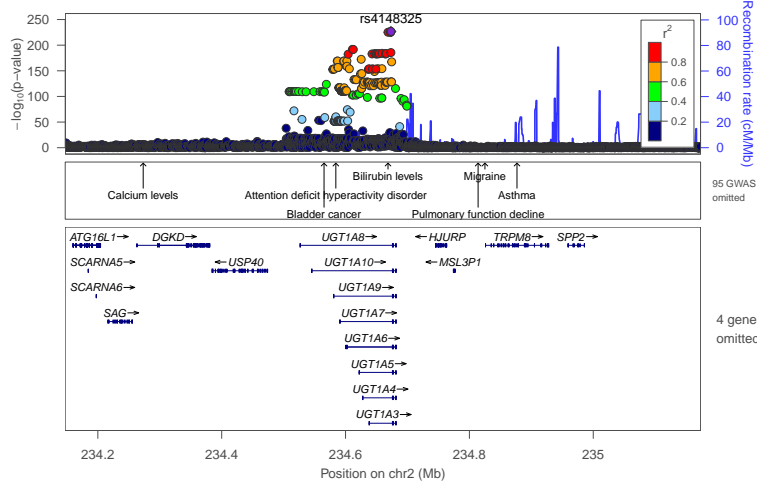

### aspartate

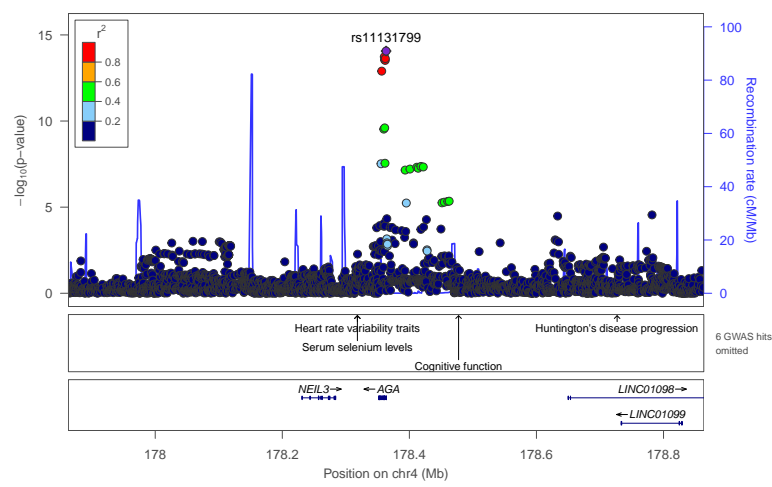

### glutarylcarnitine (C5-DC)

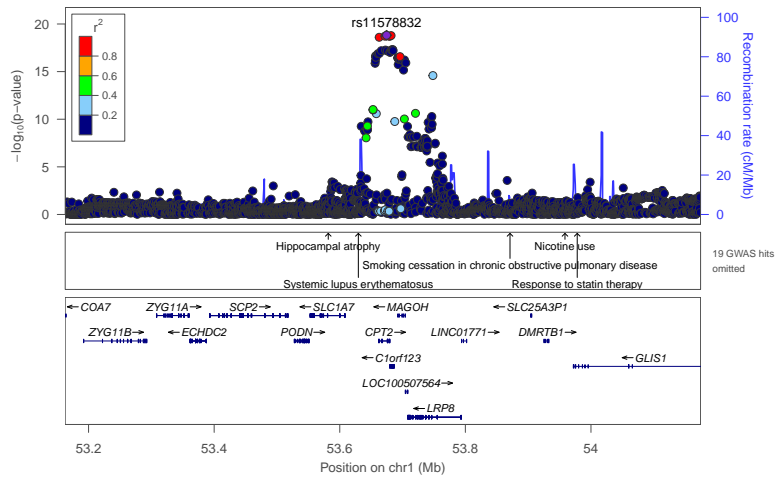

### glutarylcarnitine (C5-DC)

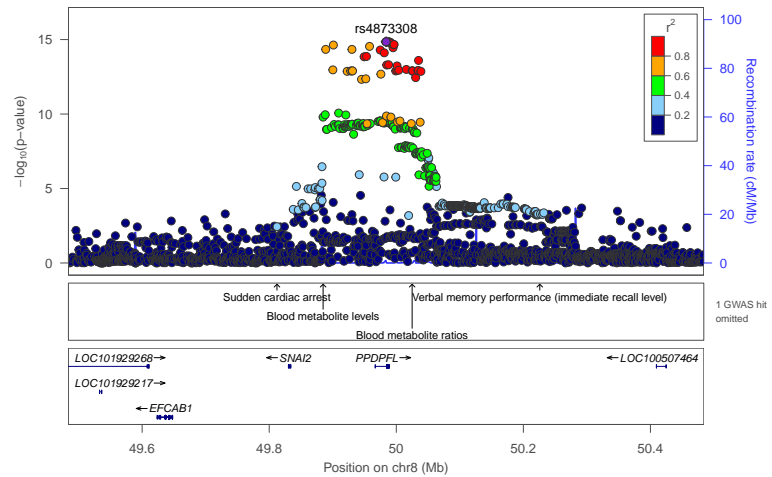

### glutarylcarnitine (C5-DC)

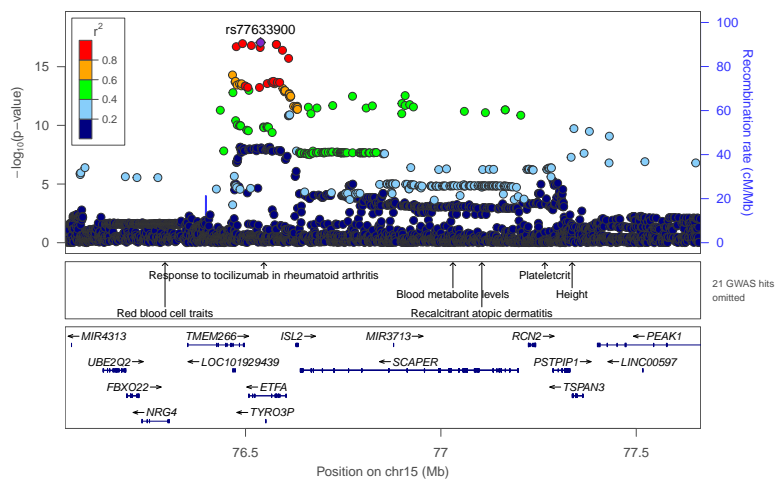

### glutarylcarnitine (C5-DC)

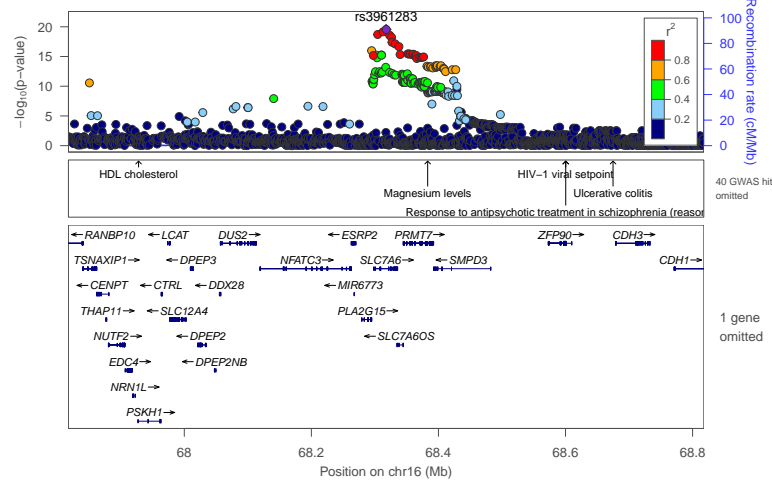

### glutaryl carnitine (C5-DC)

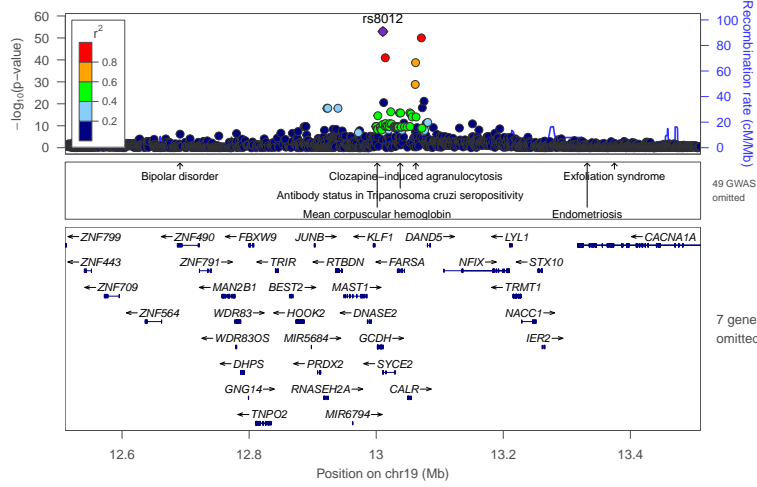

### palmitoyl carnitine (C16)

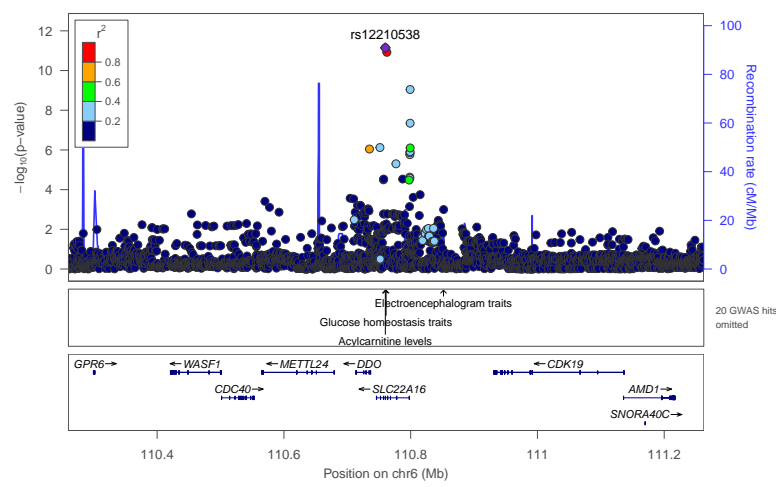

### gamma-CEHC

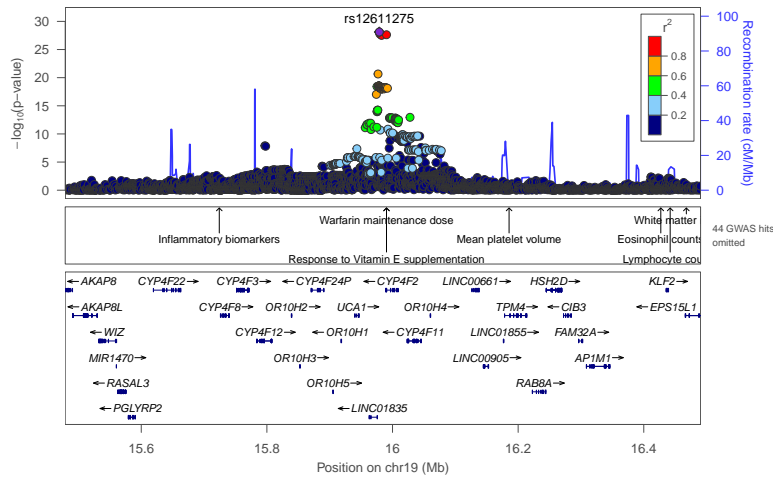

### methionine sulfone

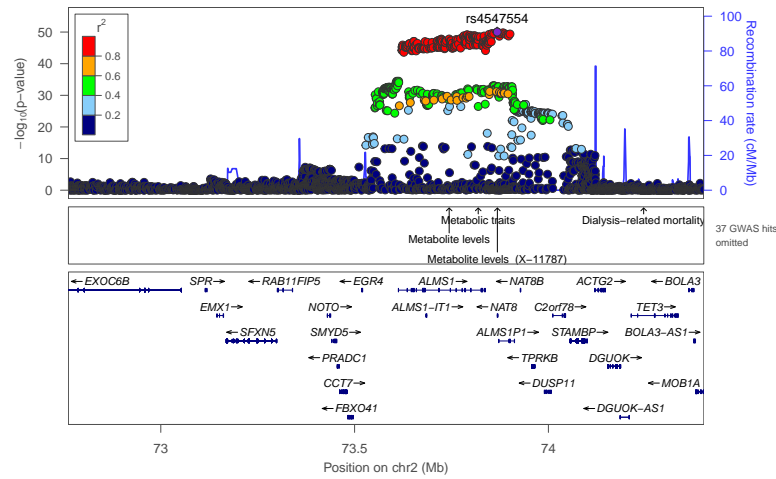

### methionine sulfone

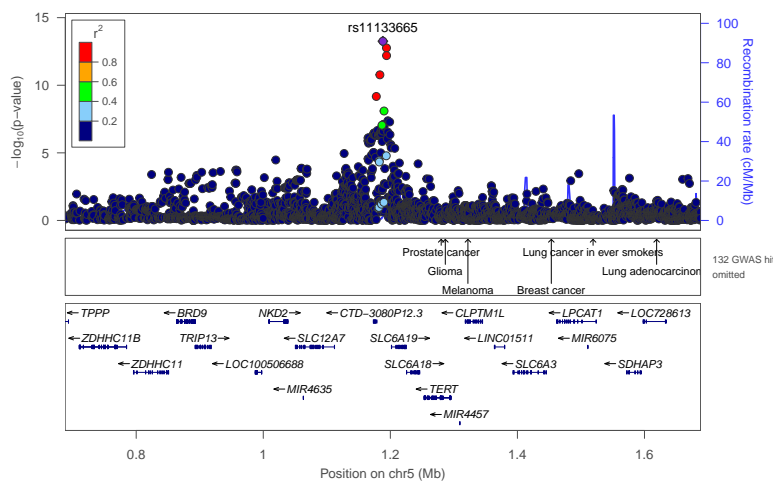

### O-sulfo-L-tyrosine

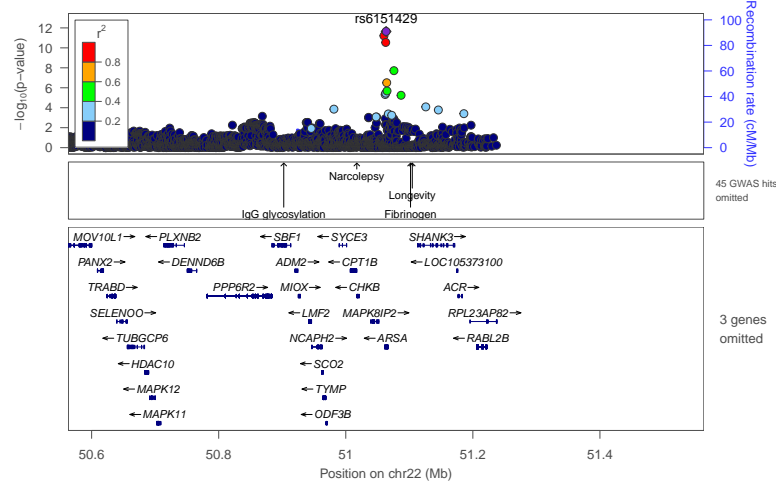

1-oleoyl-GPG (18:1)\*

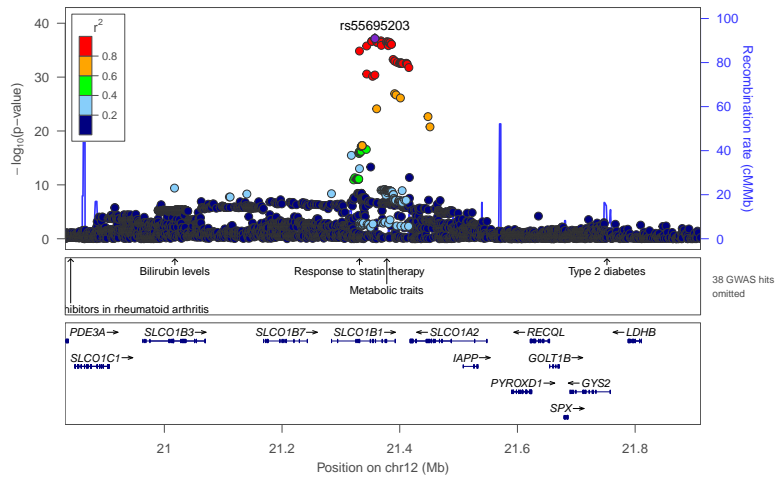

1-palmitoyl-GPG (16:0)\*

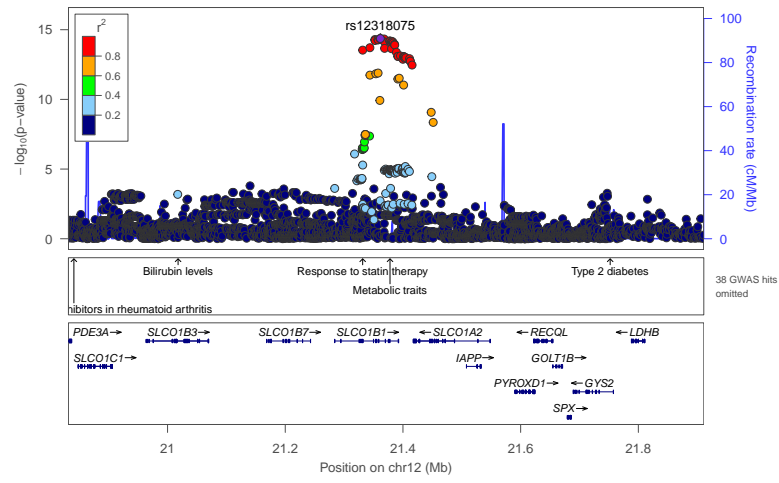

21-hydroxypregnenolone disulfate

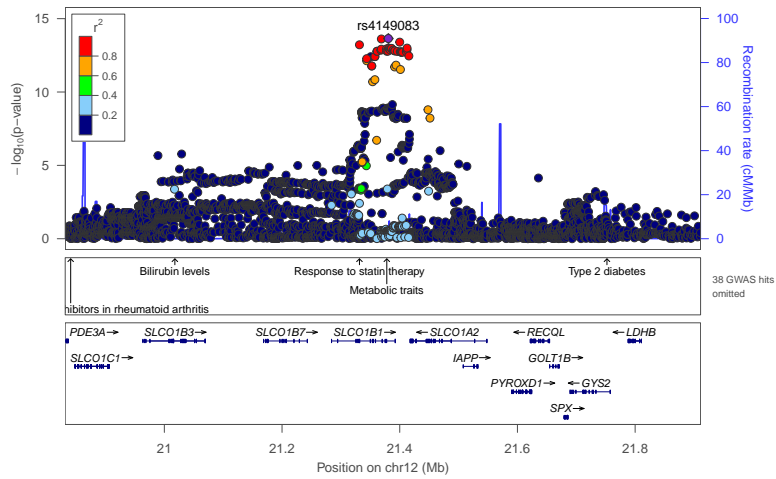

methyl glucopyranoside (alpha + beta)

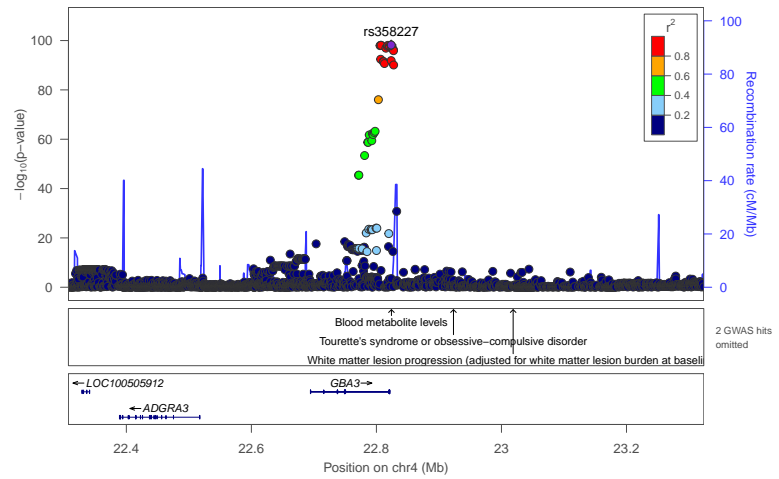

linoleoylcarnitine (C18:2)\*

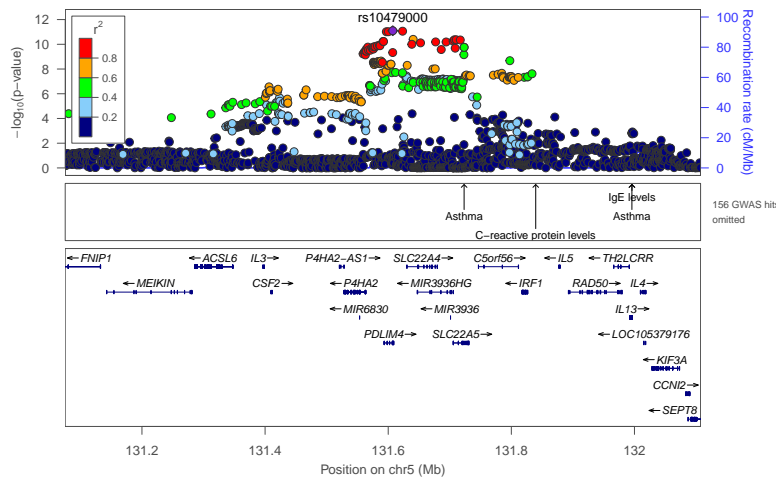

linoleoylcarnitine (C18:2)\*

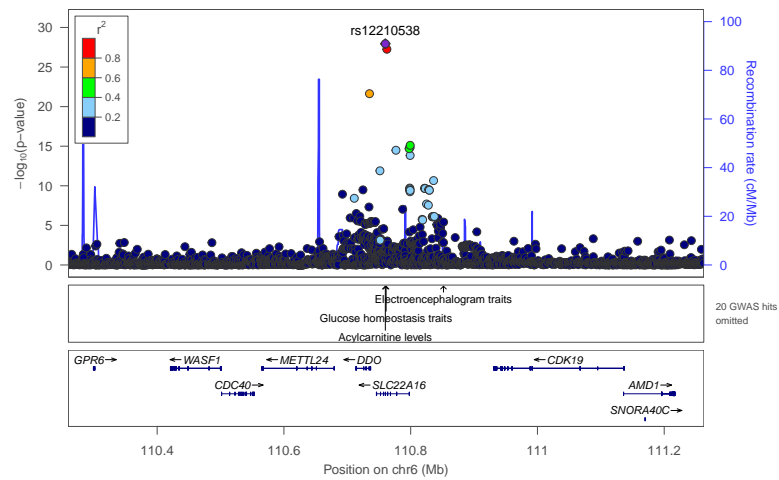

pyroglutamine\*

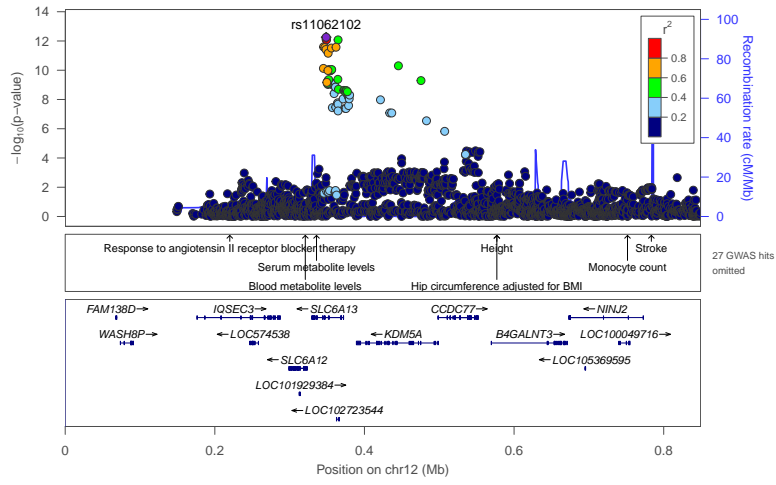

X - 21258

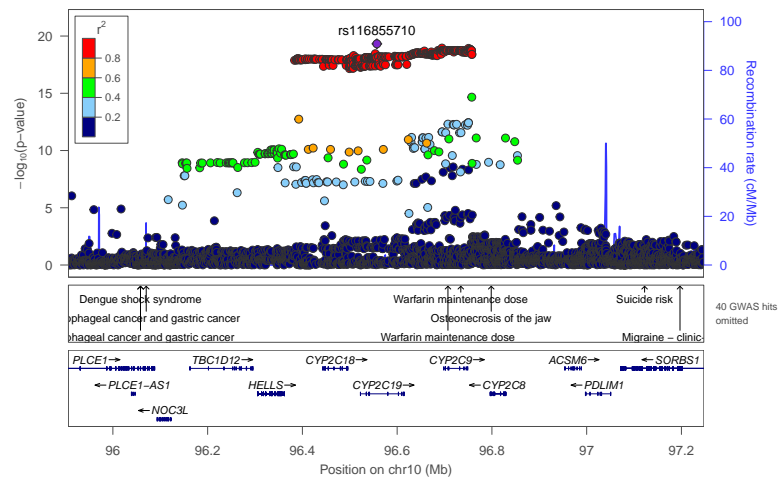

X - 21283

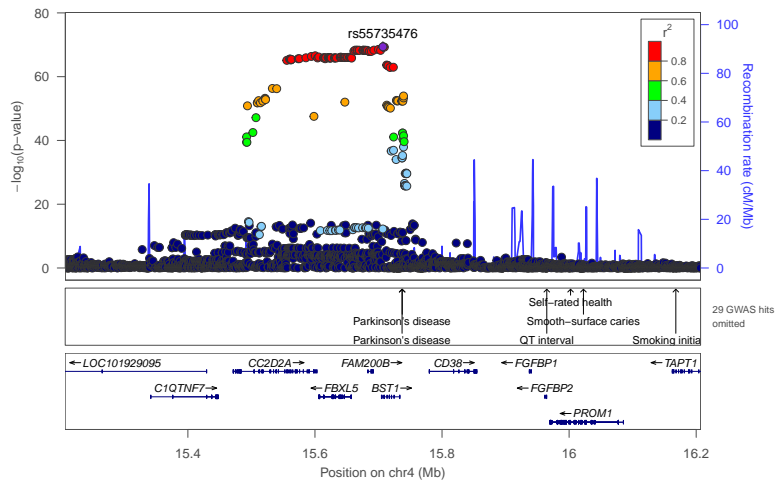

X - 11381

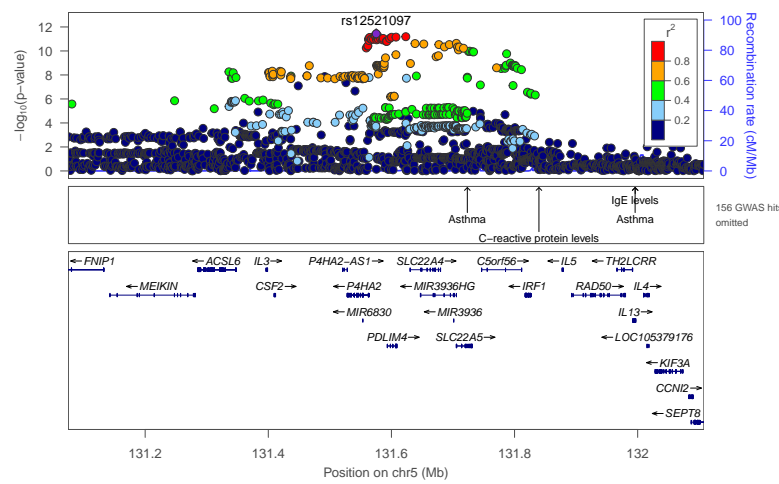

X - 11381

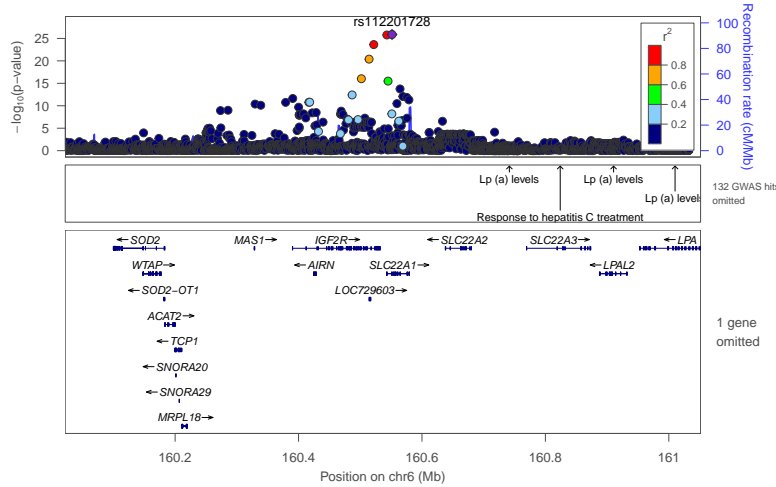

X - 21339

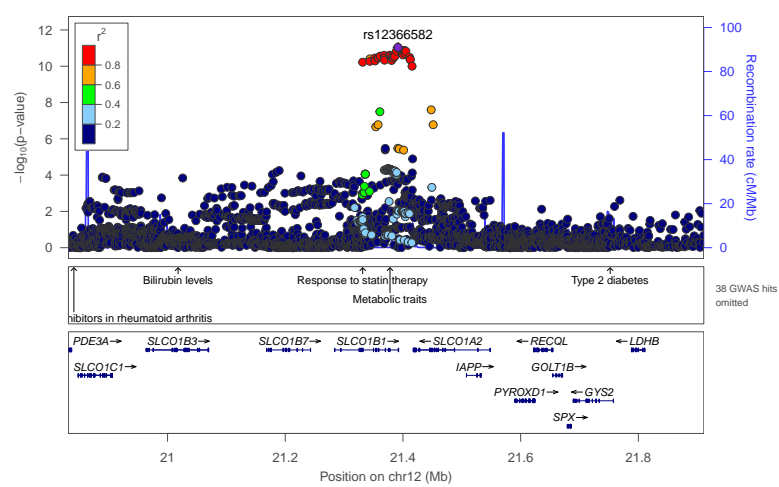





X - 21441

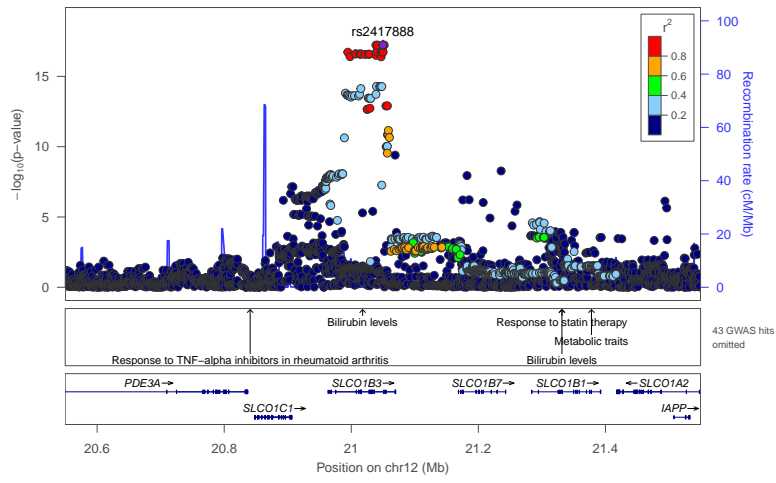

X - 21467

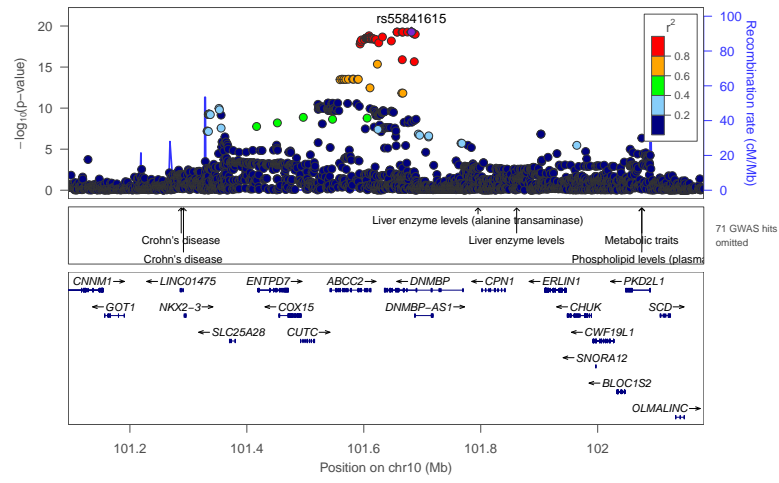

X - 21467

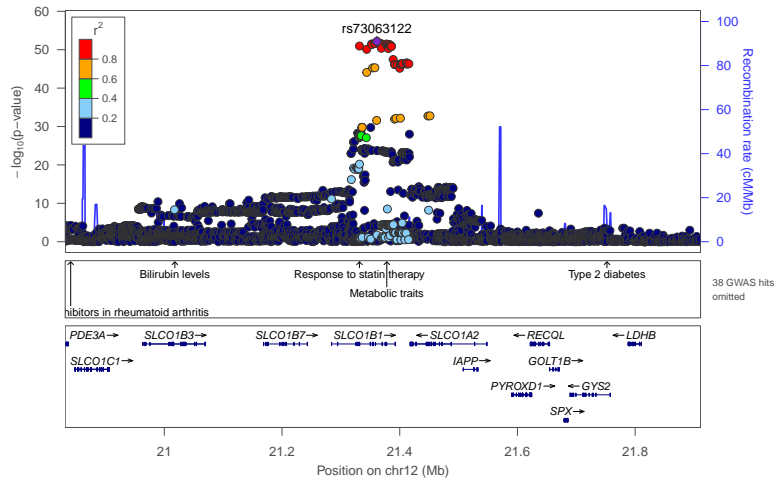

X - 21470

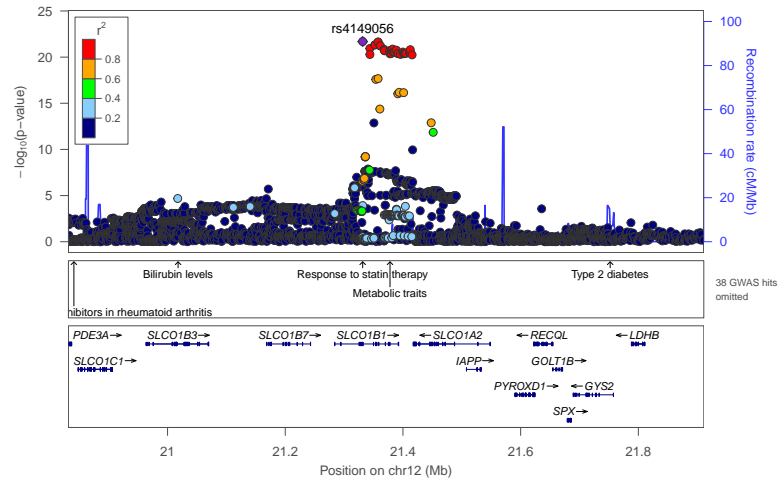

X - 21470

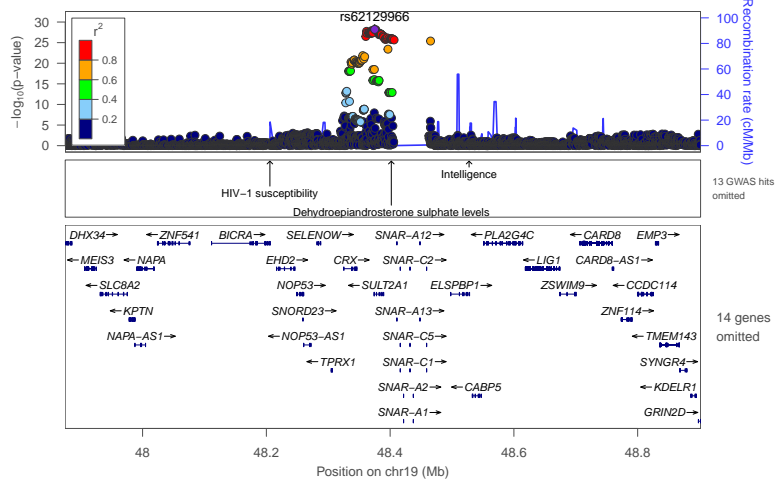

X - 21471

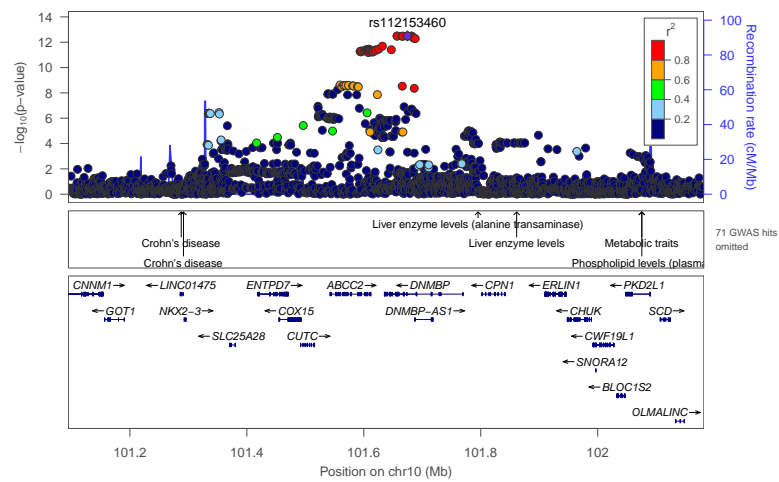



X - 21471

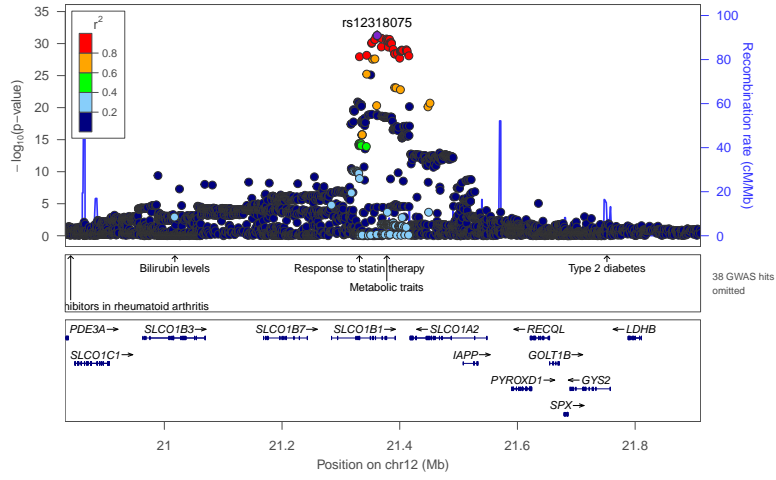

alpha-hydroxyisovalerate

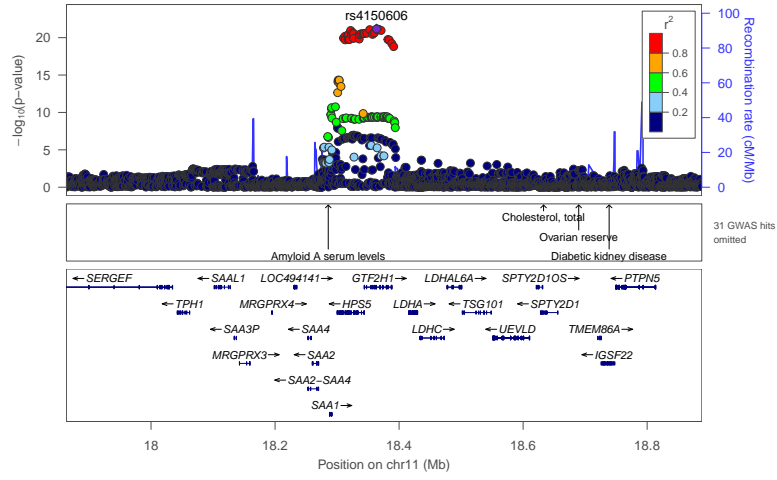

N-acetylglucosamine/N-acetylgalactosamine

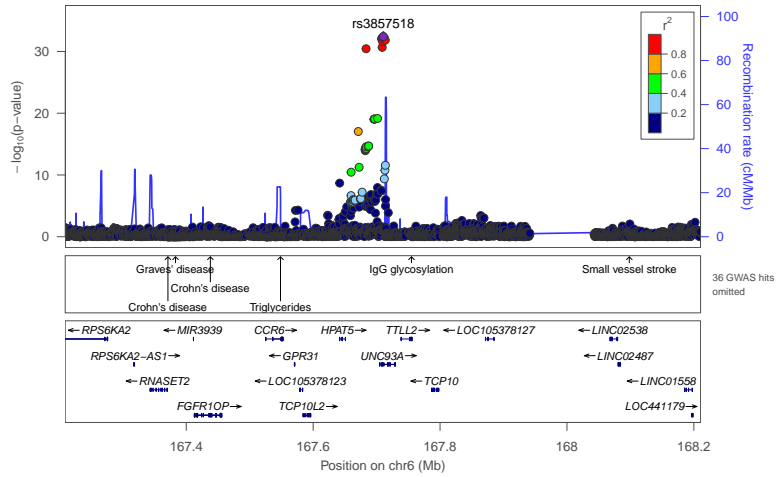

3-methylglutaryl carnitine (2)

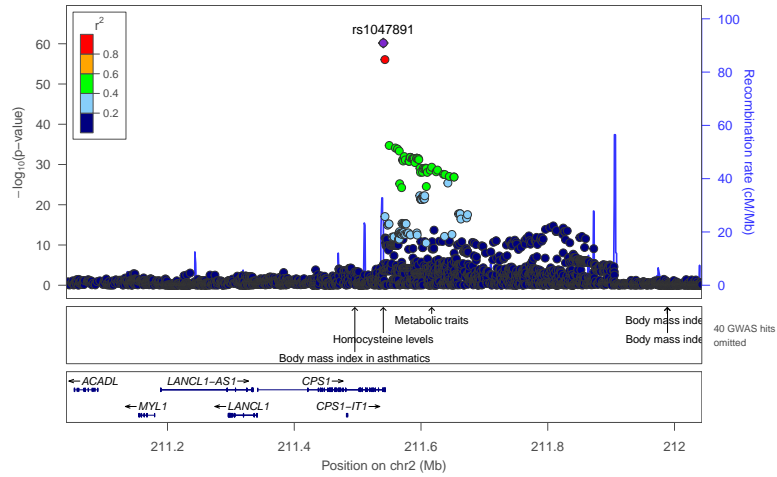

3-methylglutaryl carnitine (2)

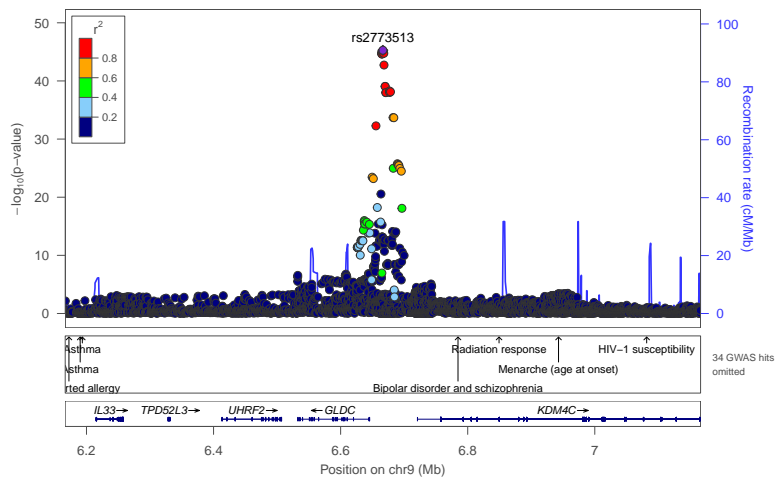

X - 11470

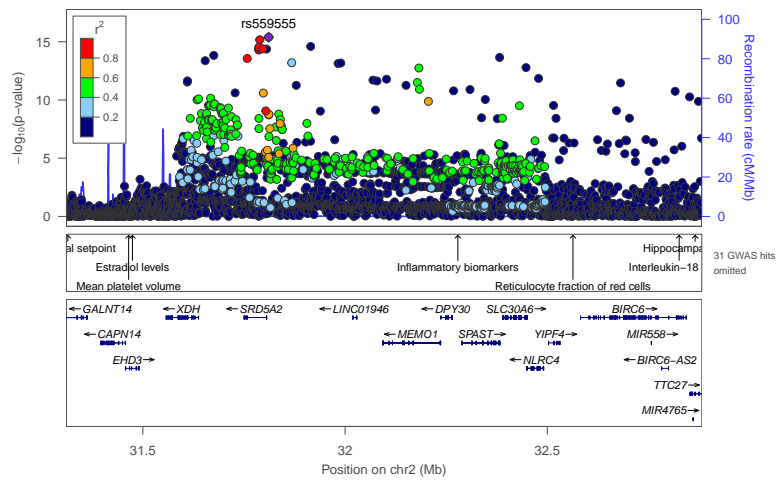

X - 11470

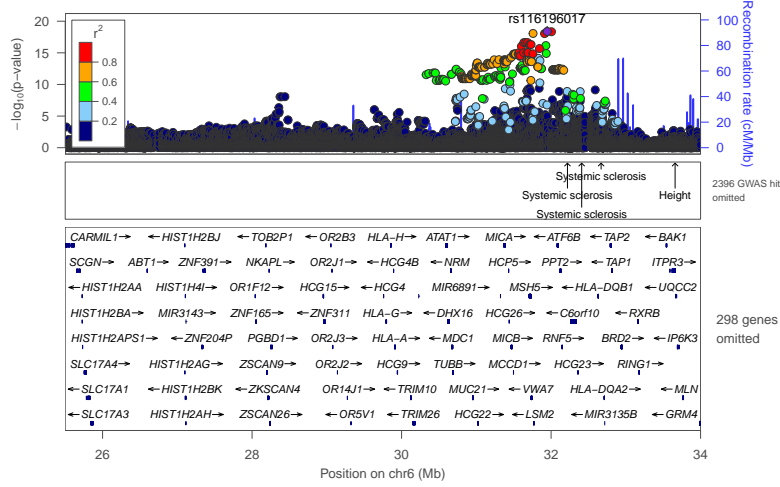

X - 11478

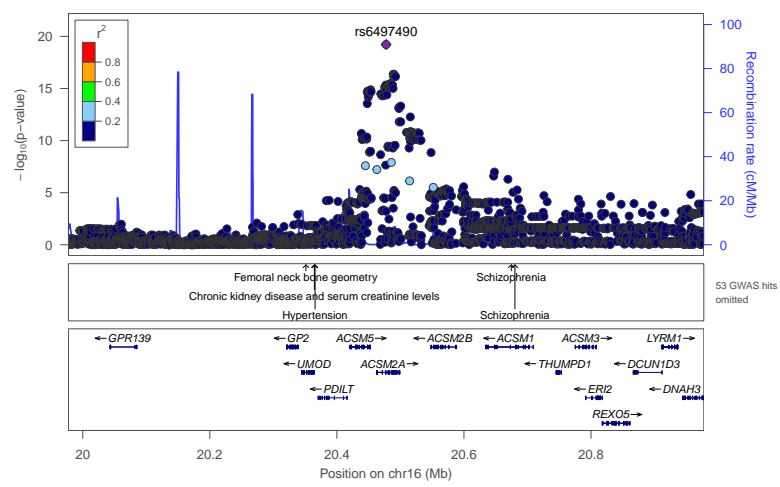

X - 11849

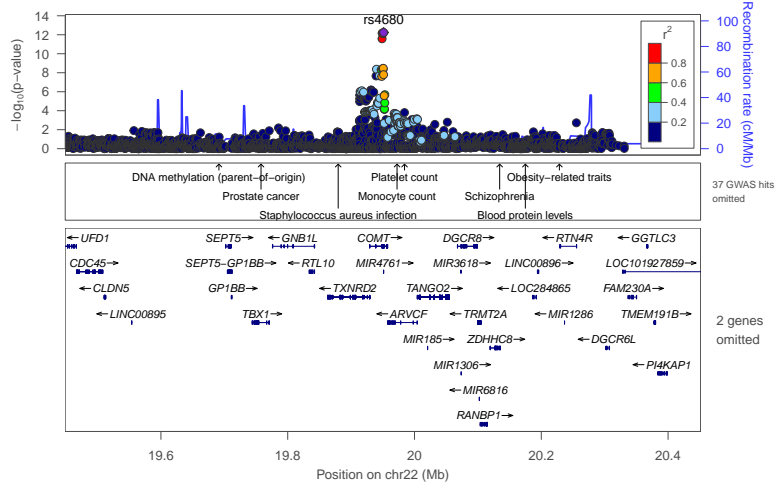

X - 12216

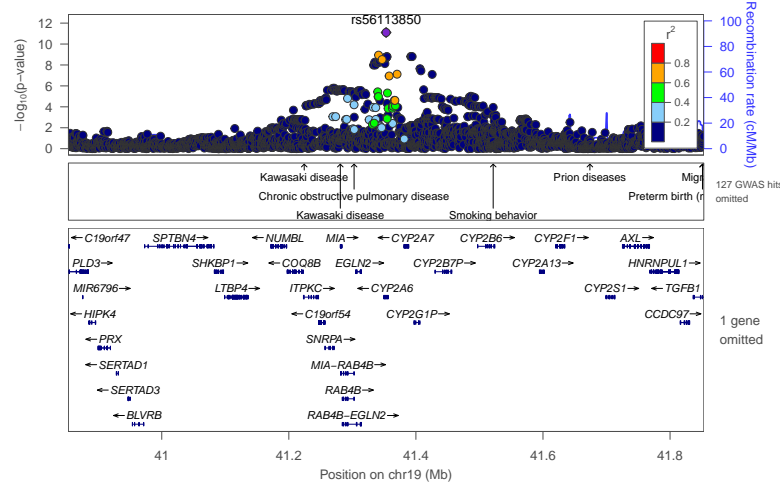

X - 12411

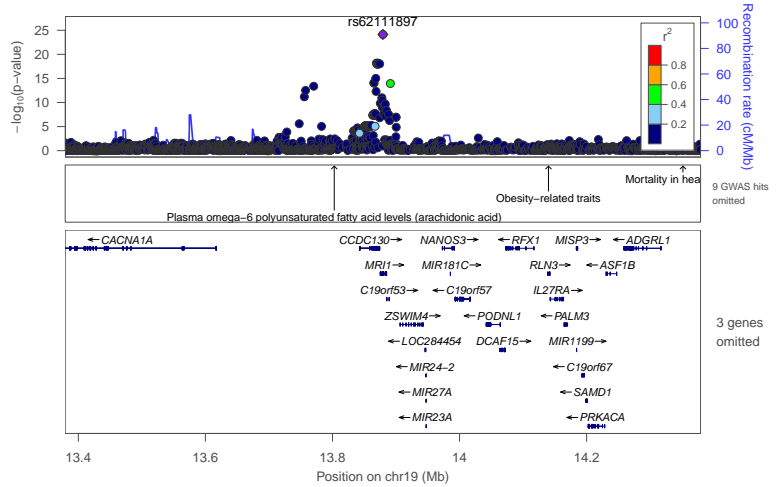

X - 12798

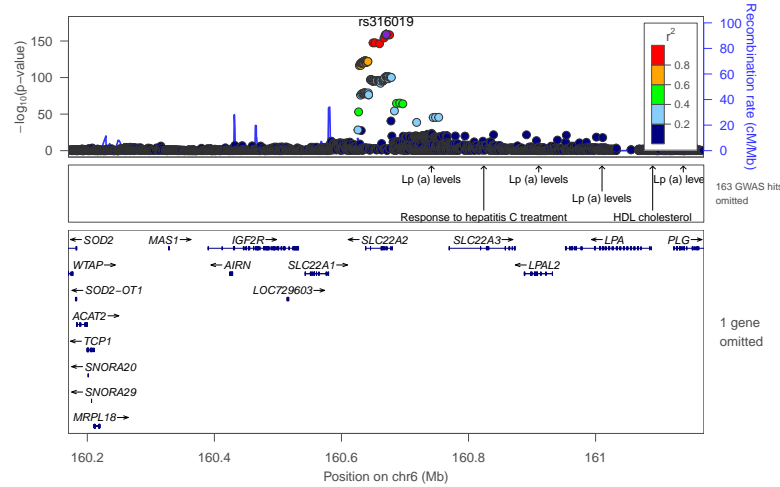

X - 12798

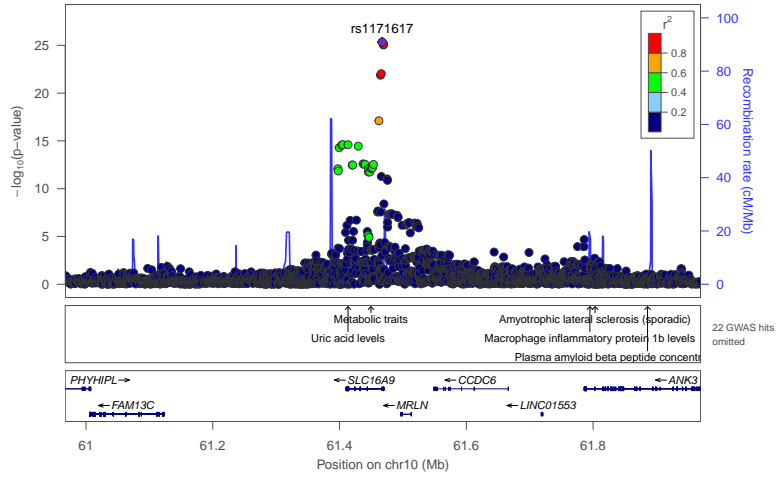

X - 12844

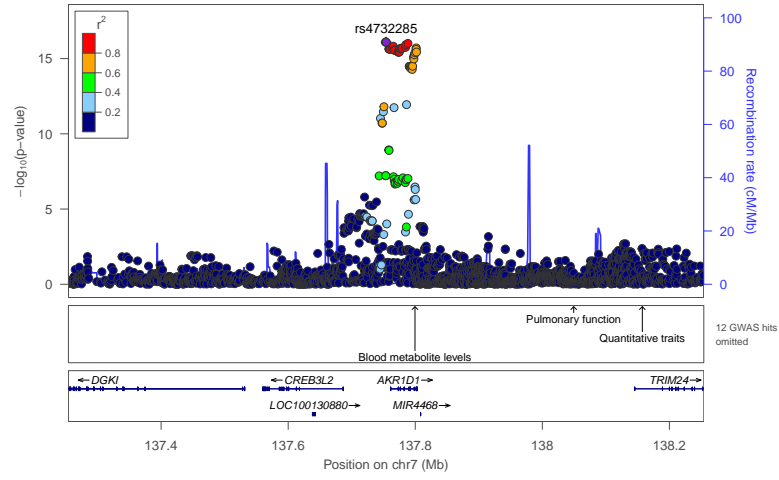

X - 14939

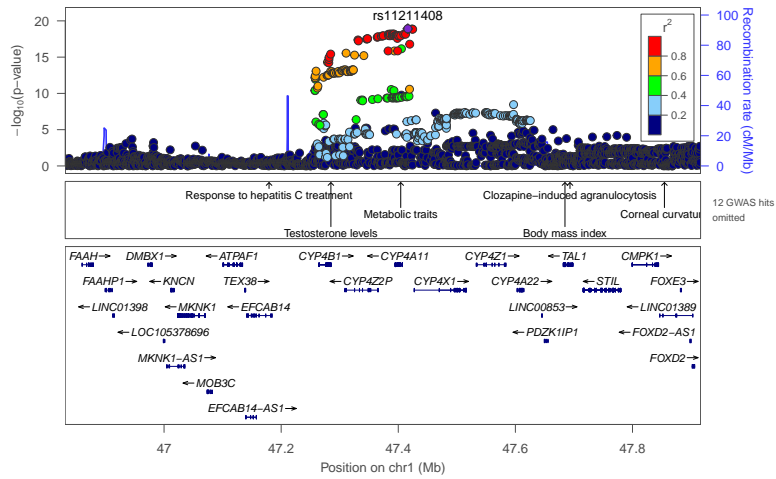

X - 16576

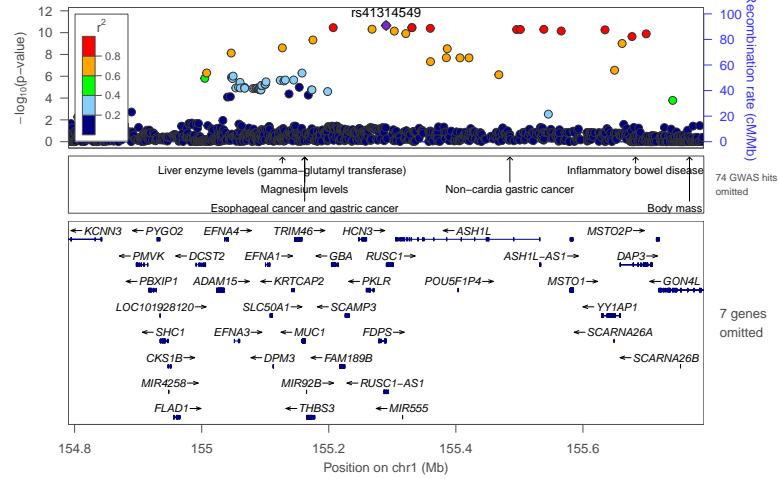

X - 21607

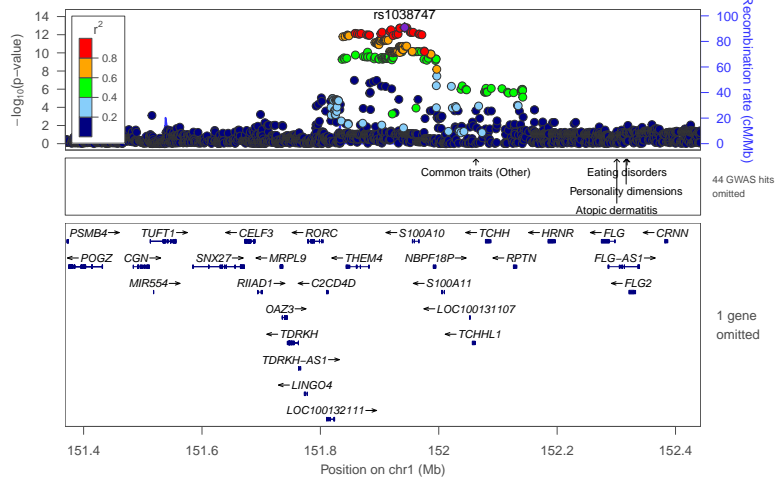

X - 21607

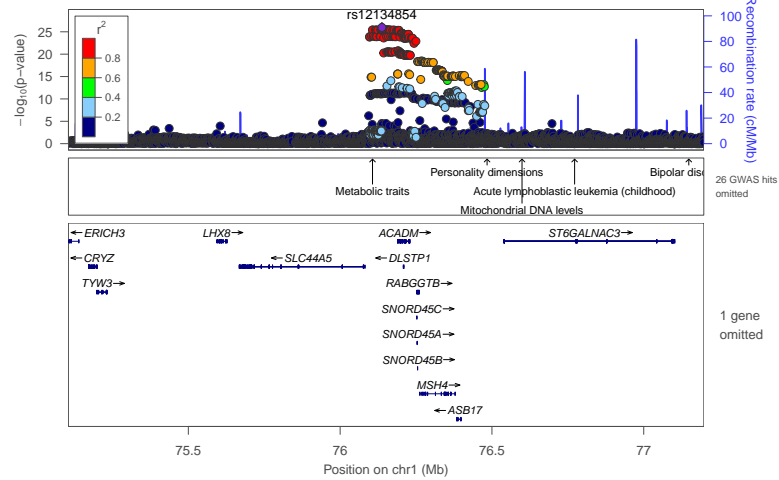

X - 21607

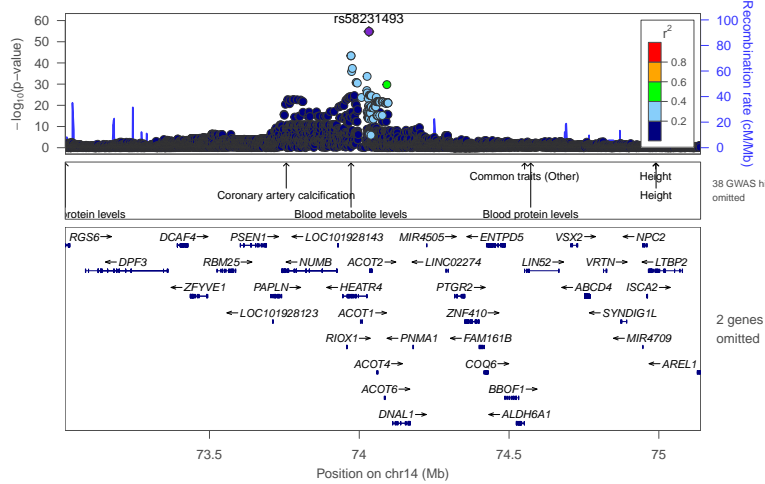

X - 18922

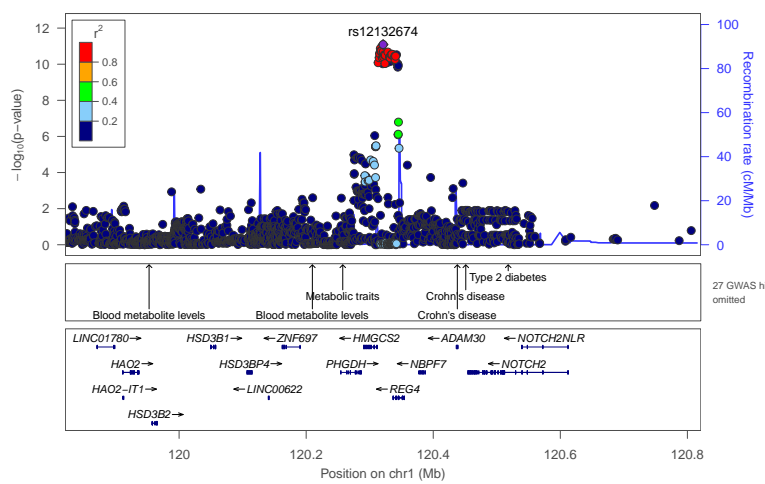

X - 18922

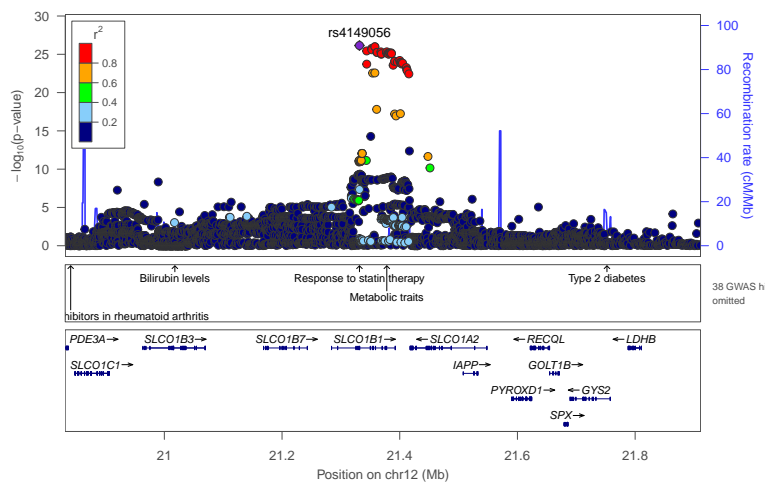

X - 19141

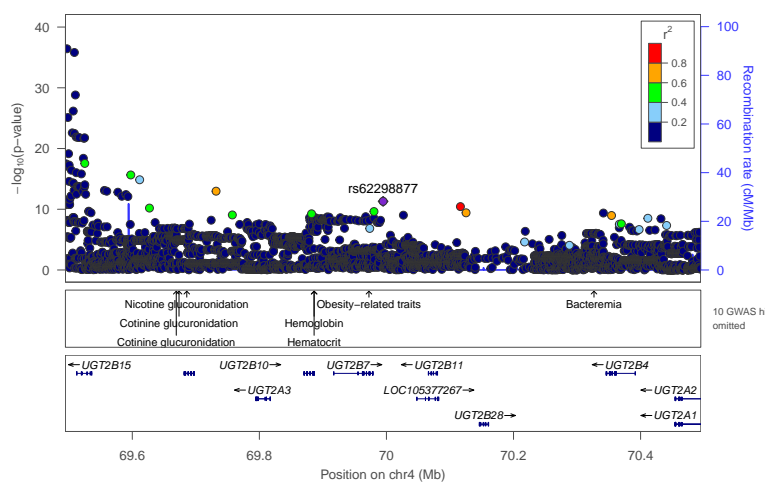

X - 19141

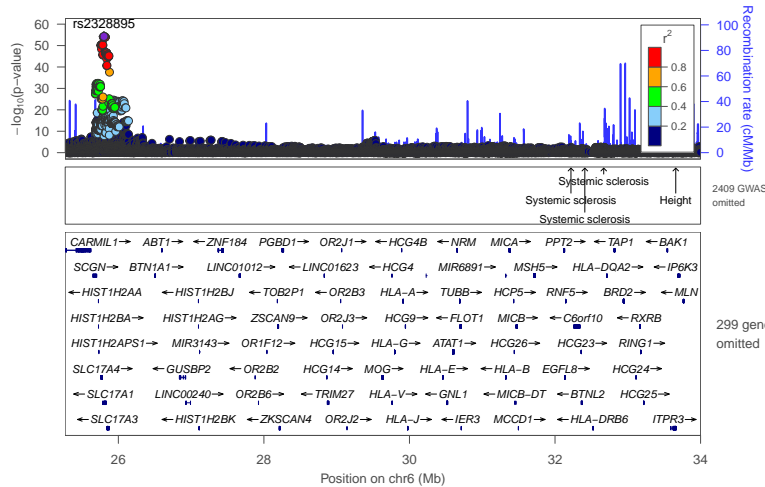

X - 17653

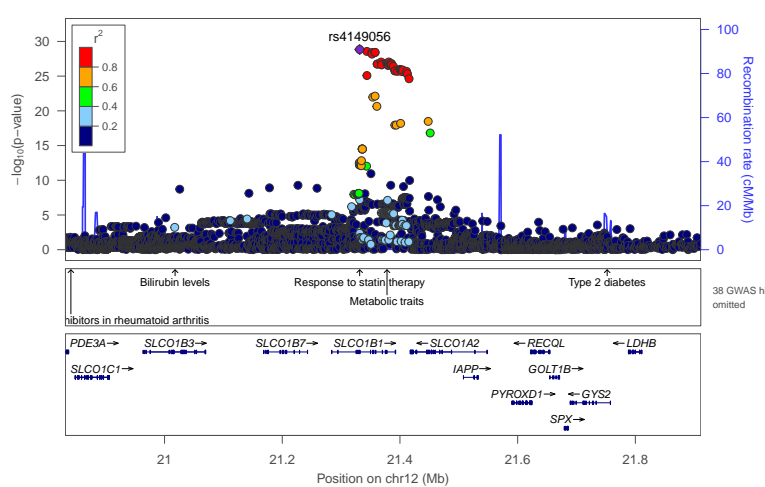

X - 17653

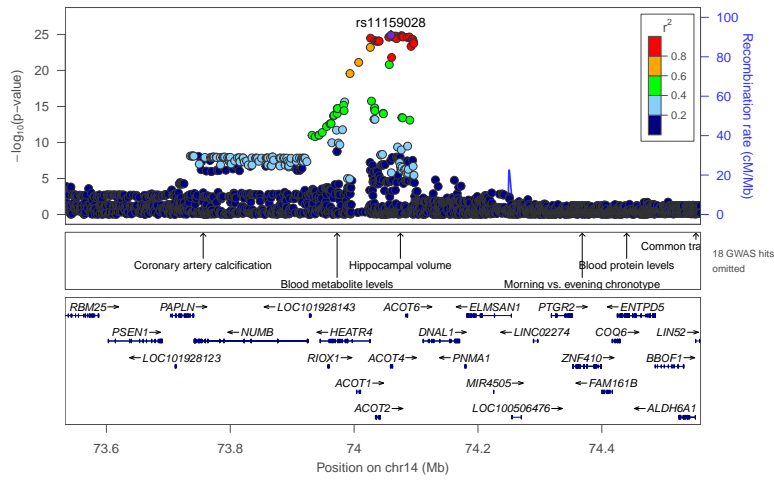

X - 17654

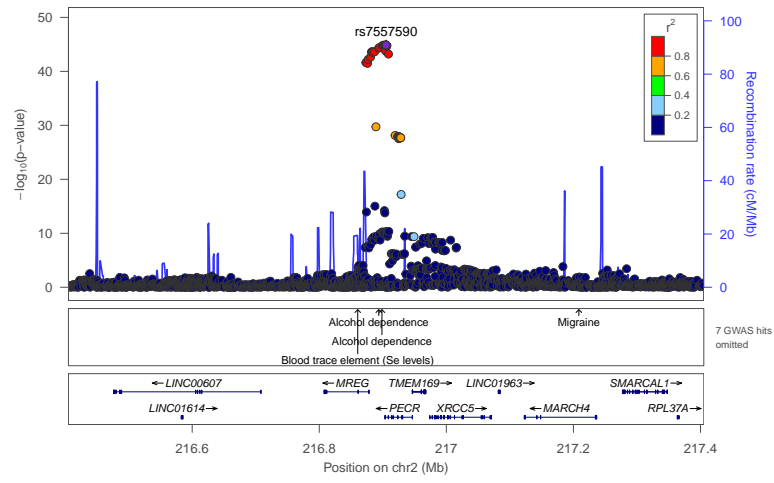

X - 17654

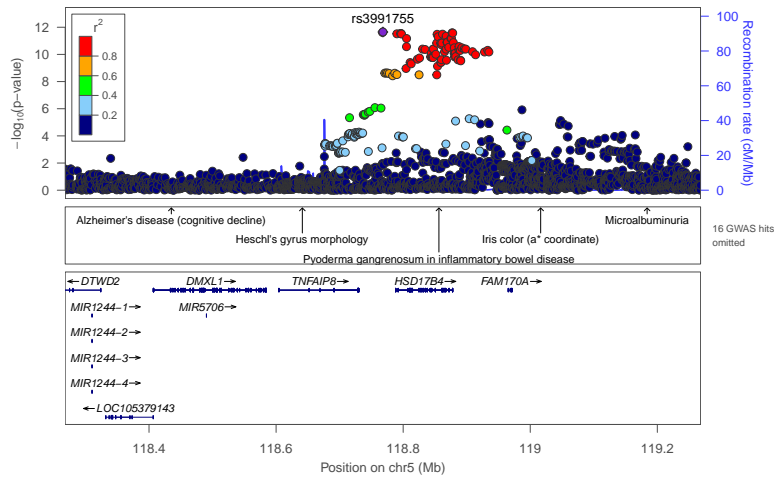

X - 17654

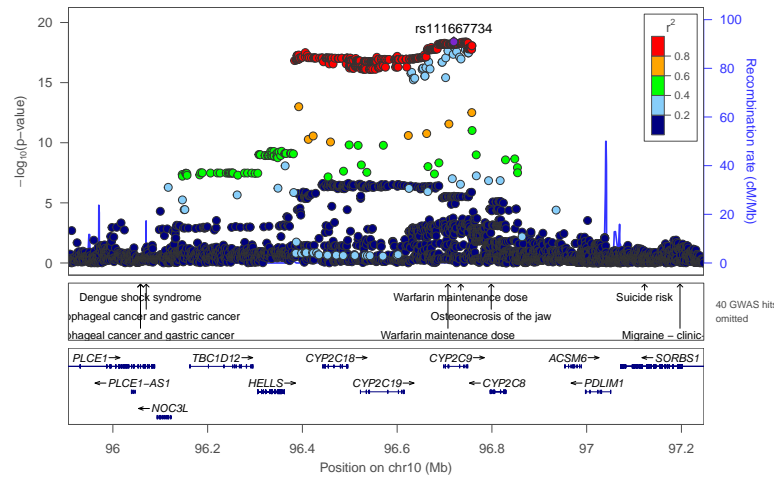

X - 17654

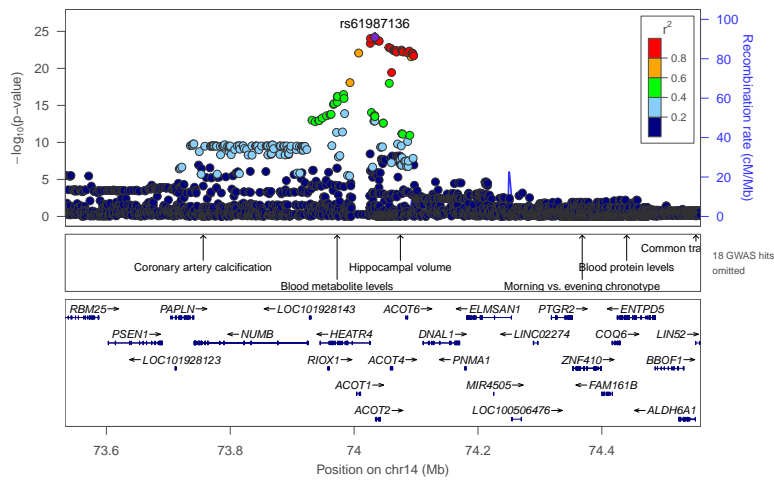

oleoyl-linoleoyl-glycerol (18:1/18:2) [1]

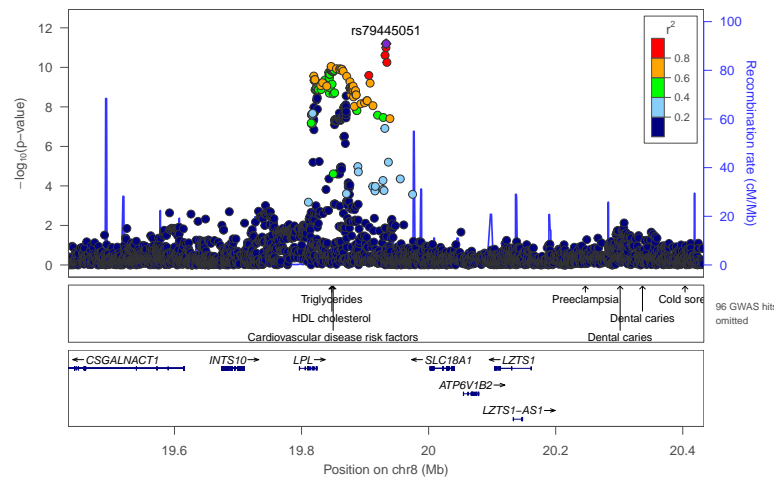

oleoyl-linoleoyl-glycerol (18:1/18:2) [1]

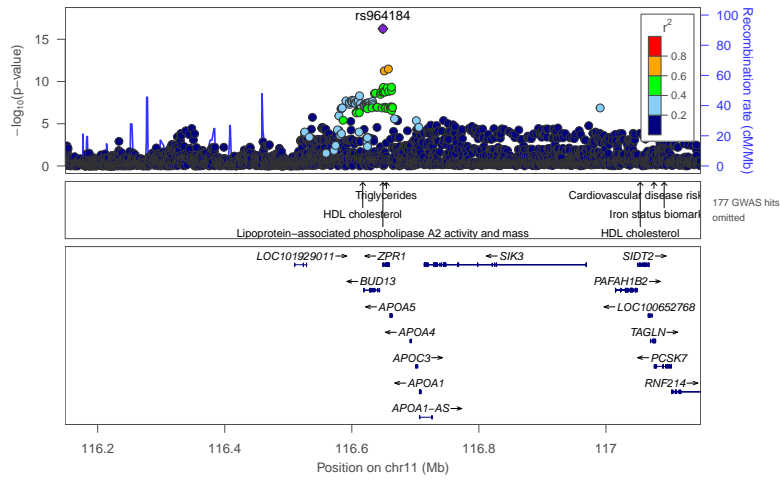

oleoyl-linoleoyl-glycerol (18:1/18:2) [2]

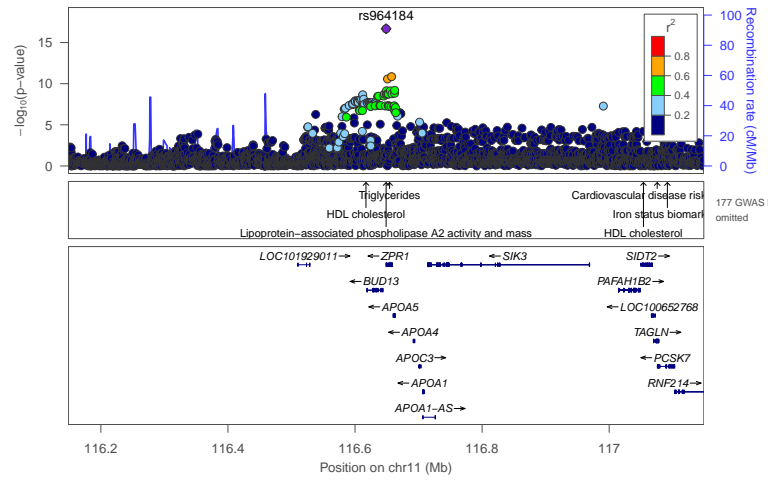

X - 21796

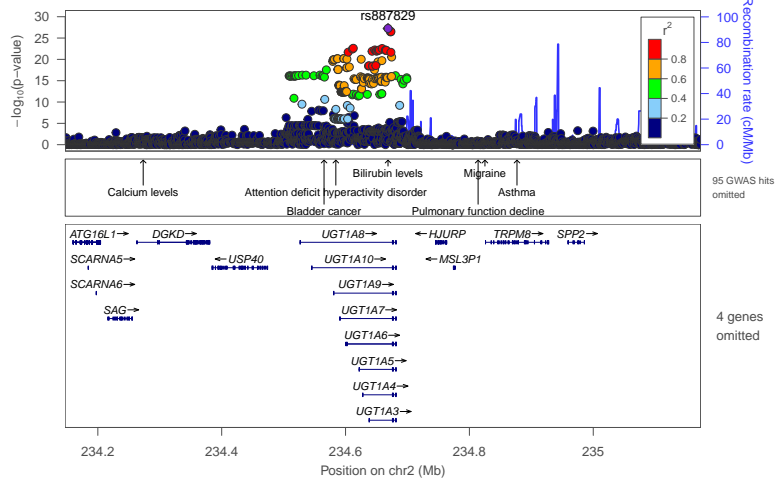

X - 15503

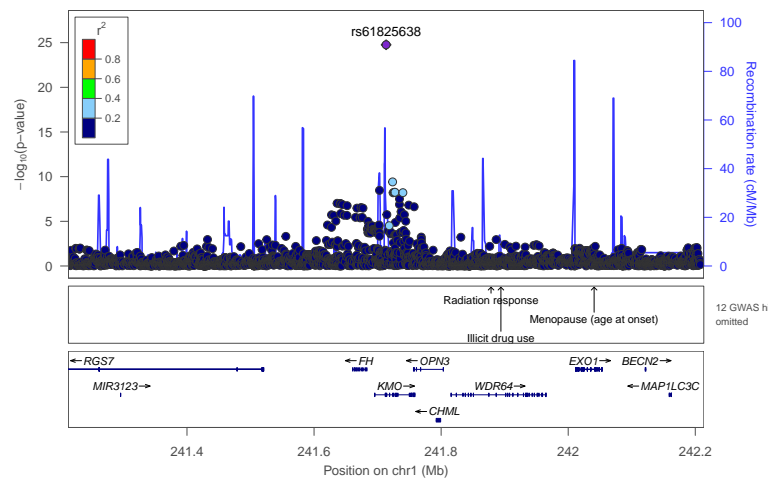

X - 15503

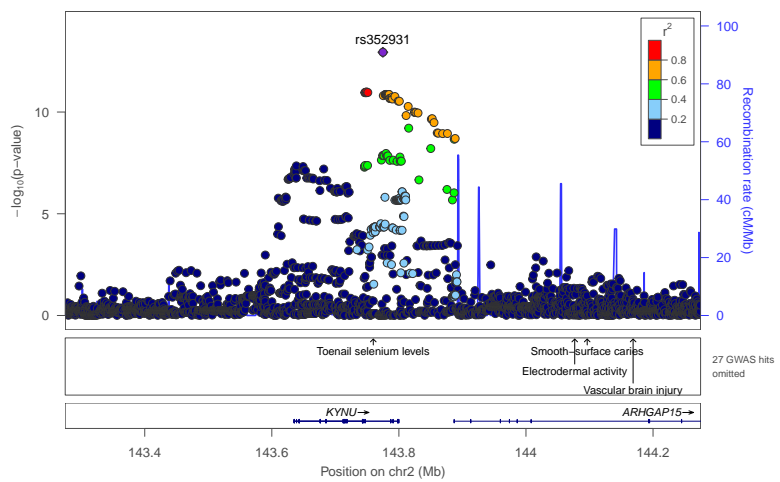

X - 12822

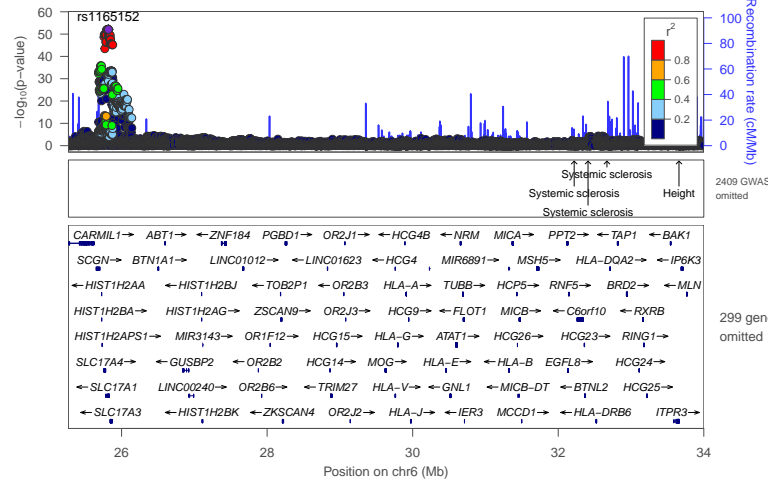



### N-methylpipecolate

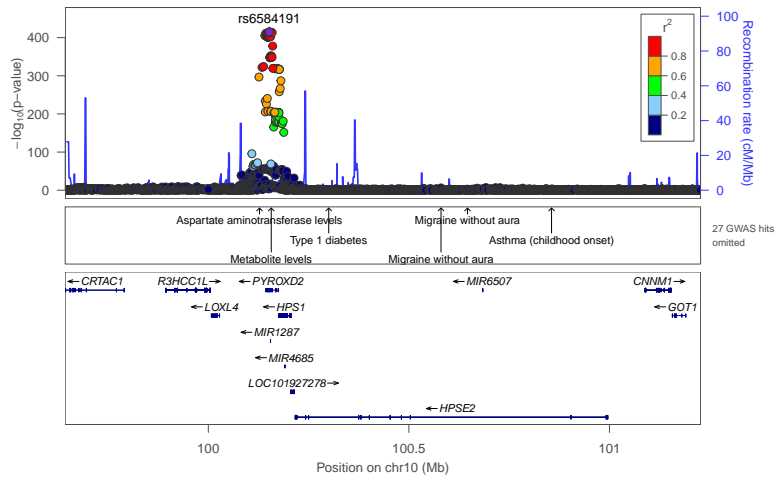

### etiocolanolone glucuronide

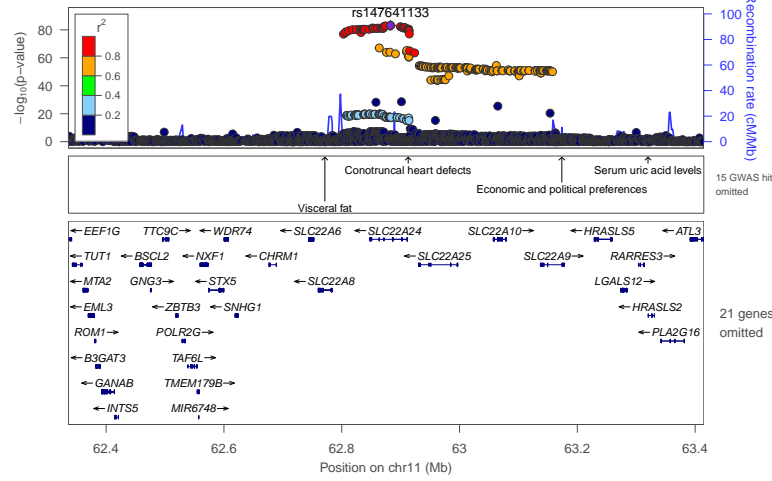

### ferulic acid 4-sulfate

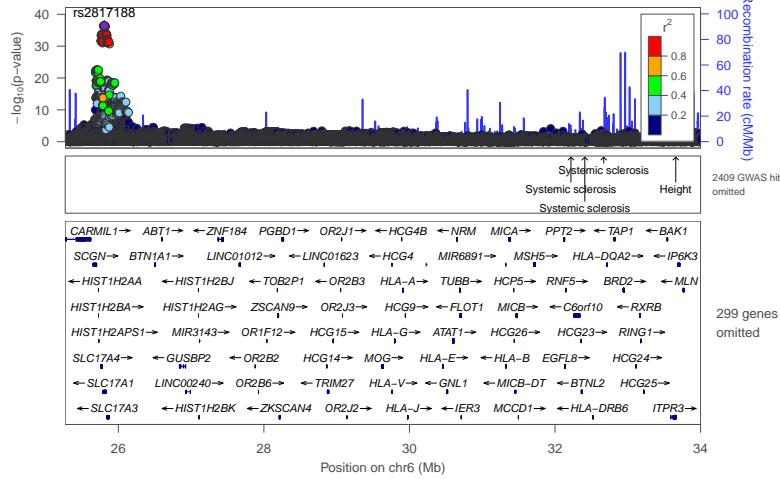

### 17alpha-hydroxypregnanolone glucuronide

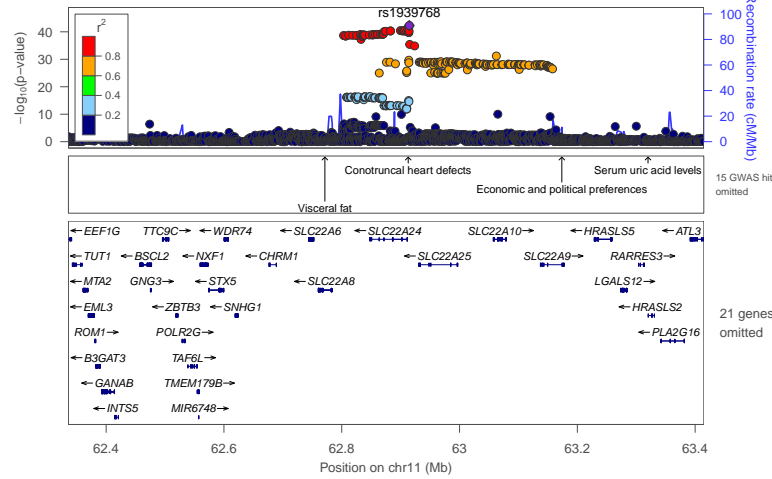

### X - 22162

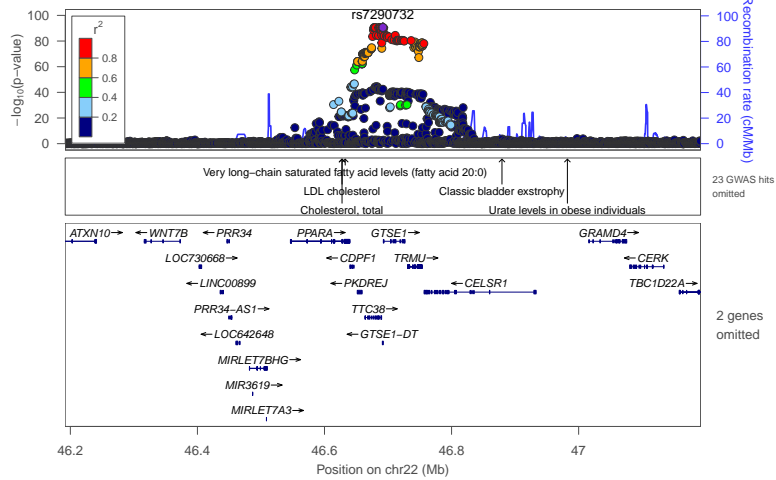

### X - 12456

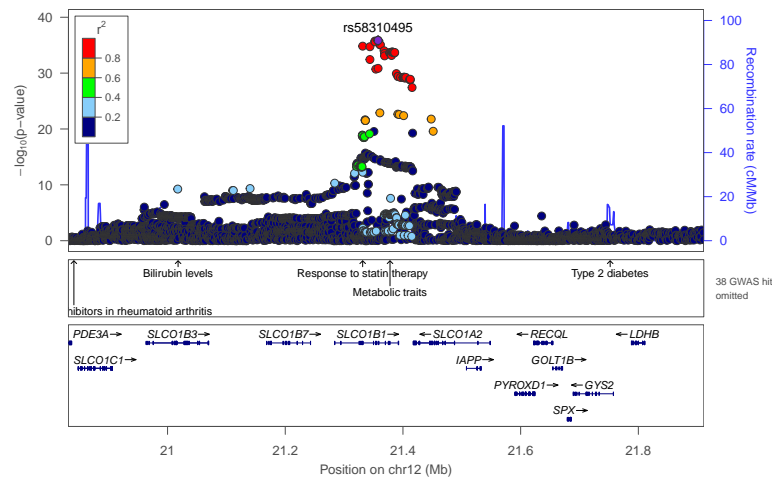

### X - 18921

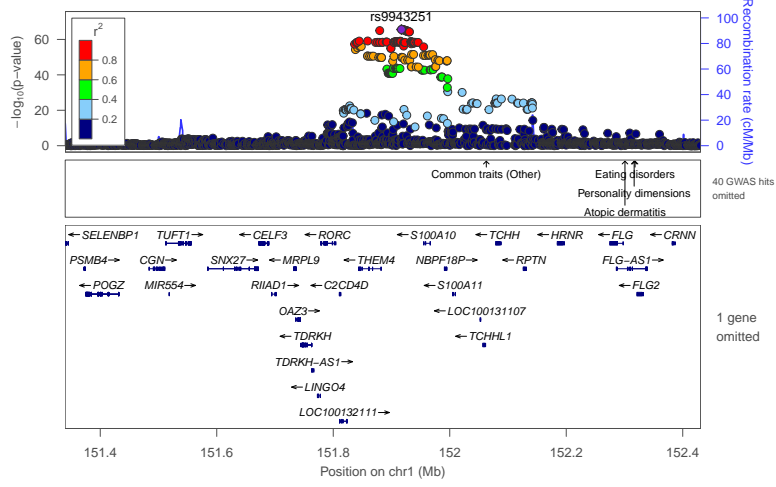

### X - 18921

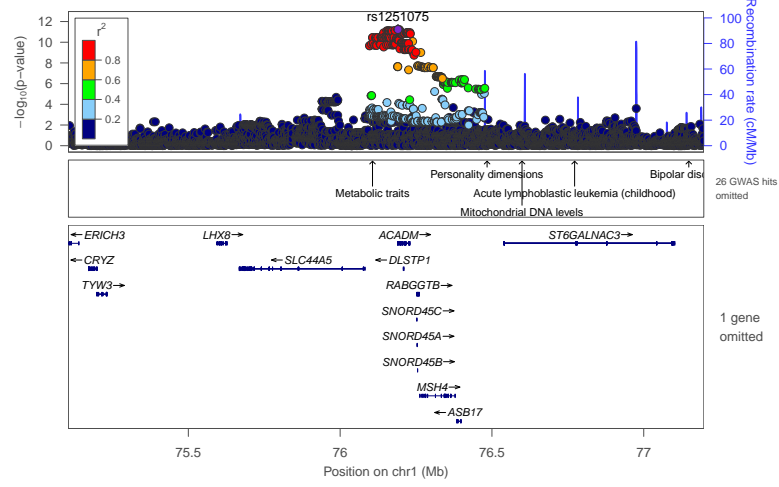

### X - 12100

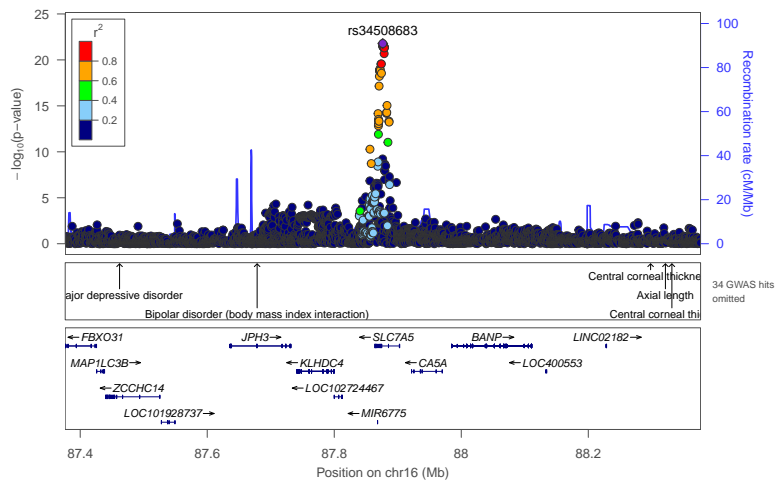

### X - 12112

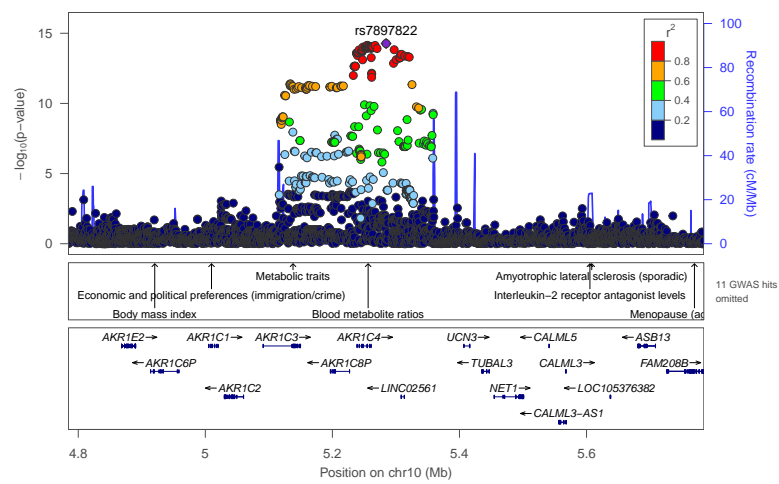

### X - 12112

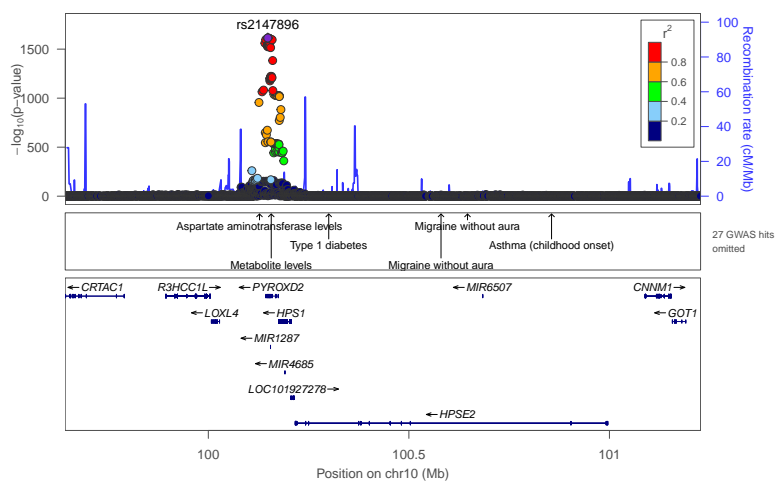

### X - 12117

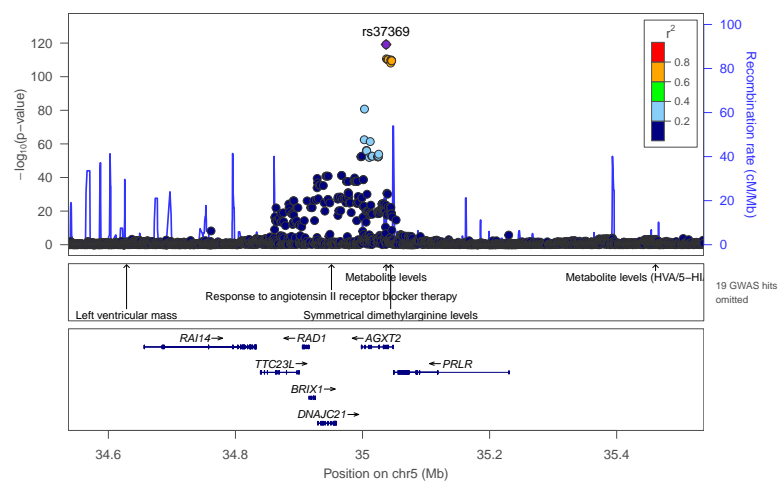

X - 12199

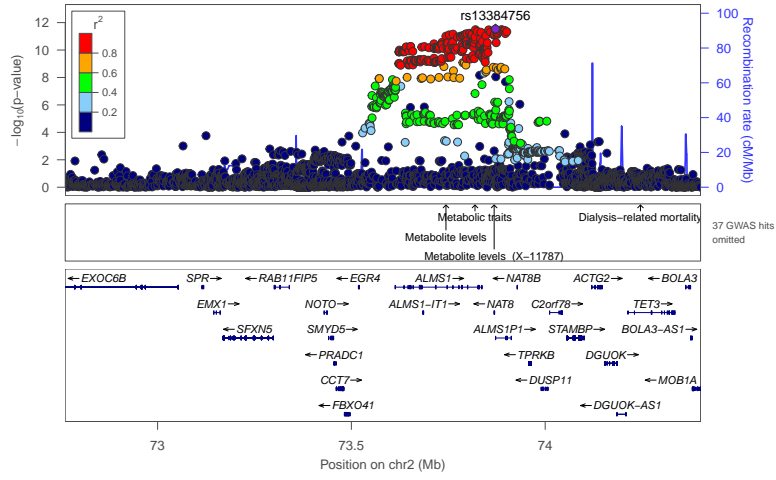

X - 12689

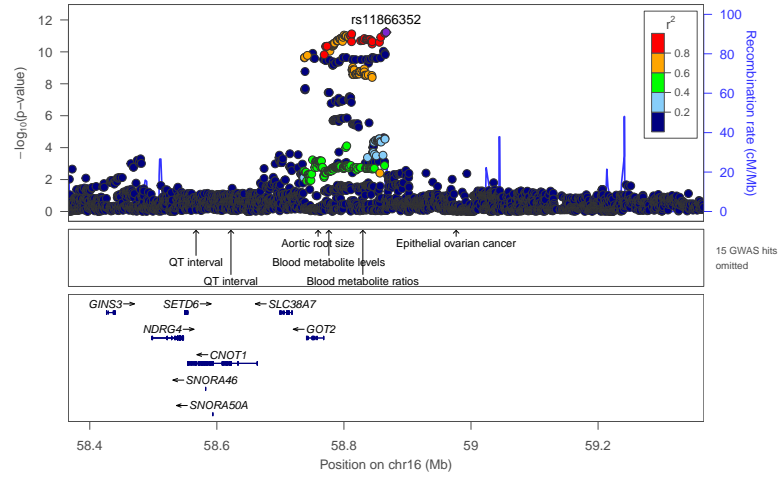

X - 12753

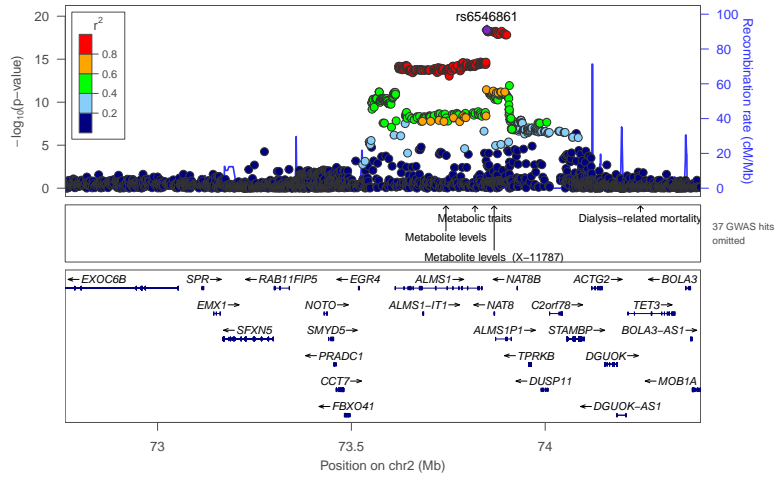

X - 13431

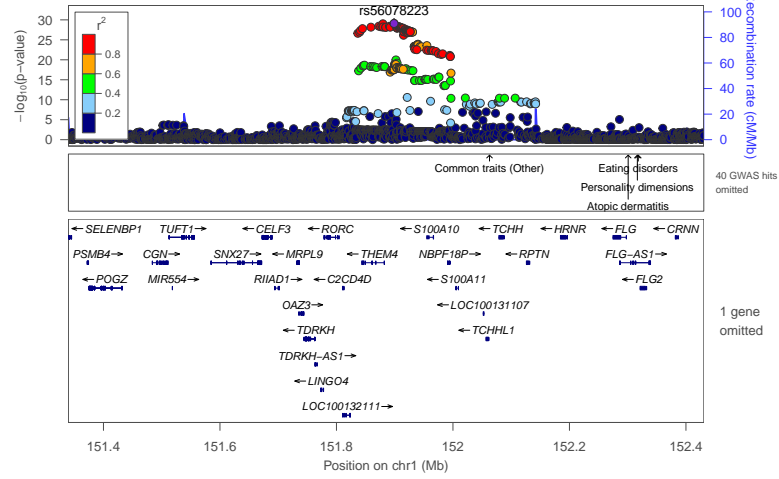

X - 13431

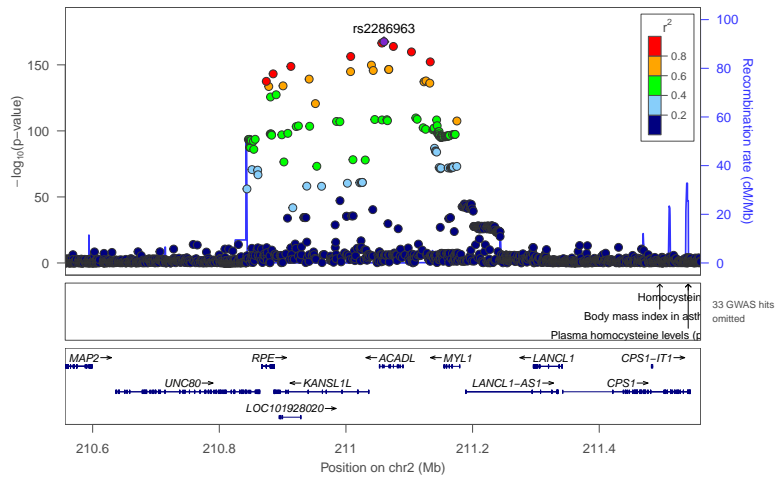

X - 13684

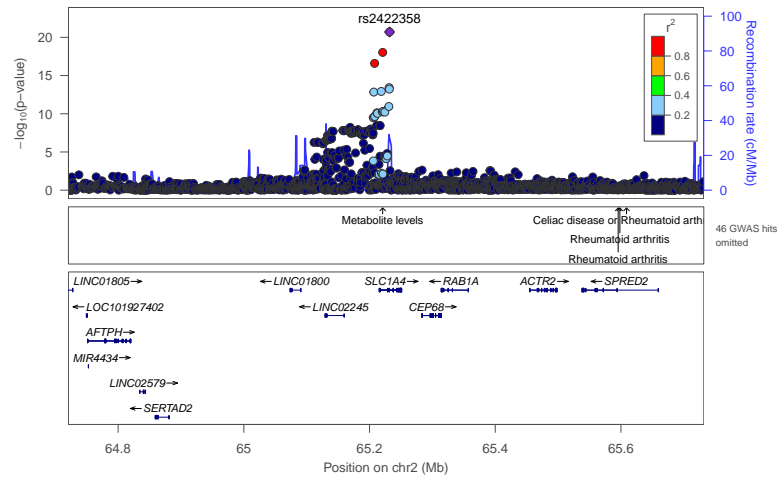

X - 13684

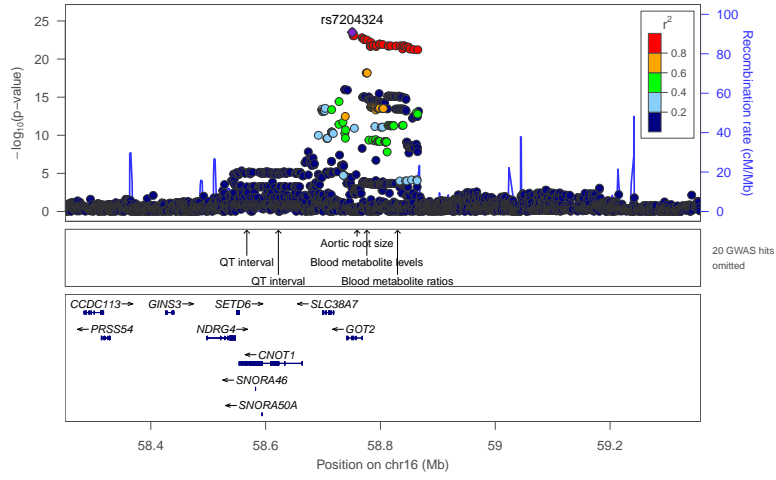

X - 17304

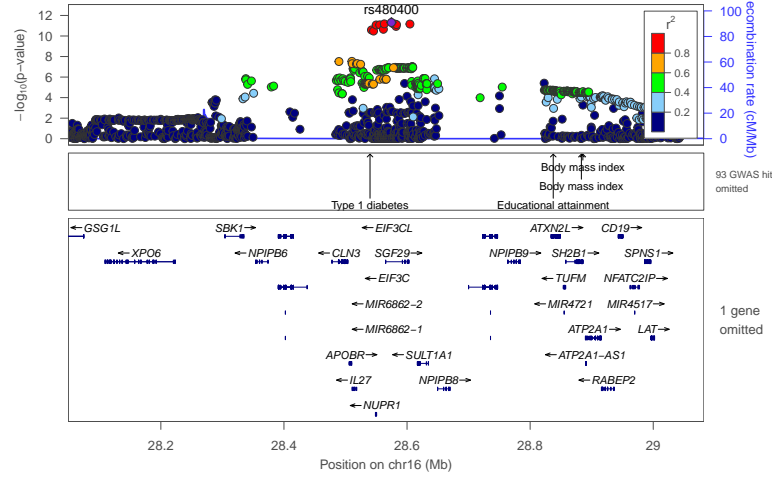

X - 17323

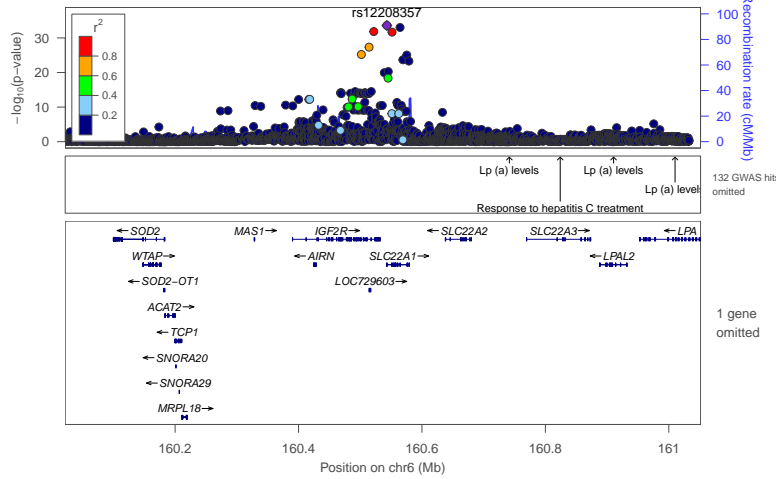

bilirubin (E,Z or Z,E)\*

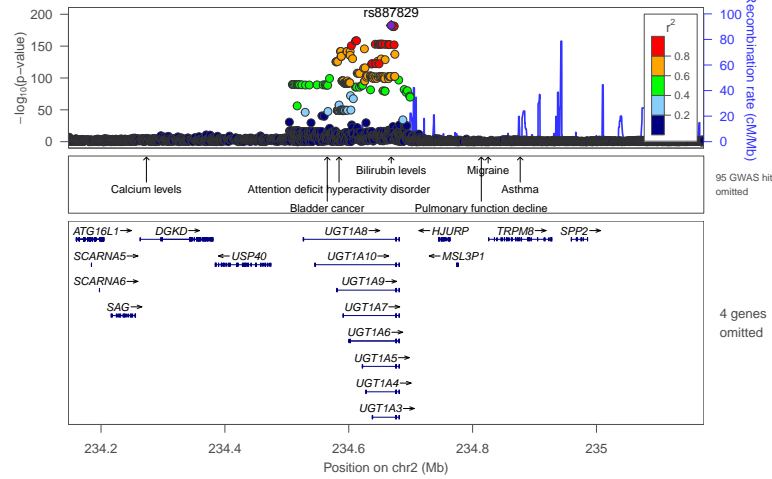

X - 12410

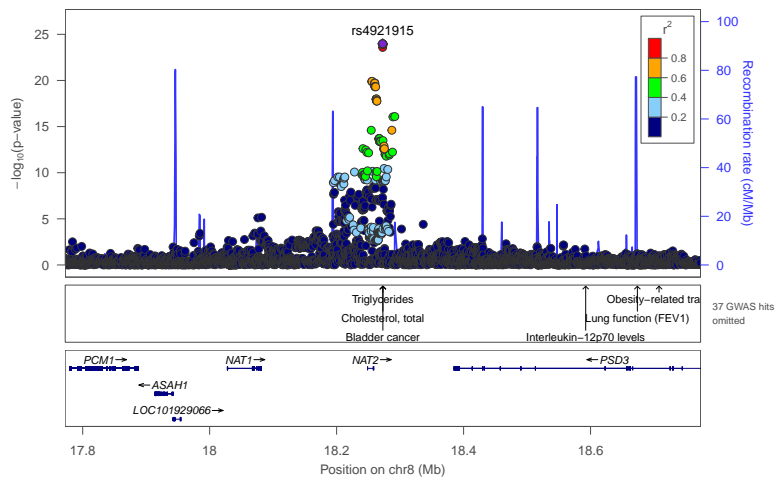

X - 13846

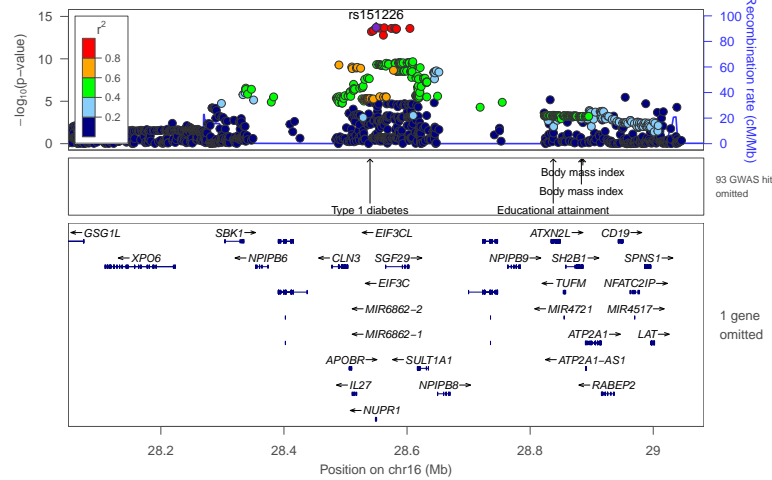

X - 16087

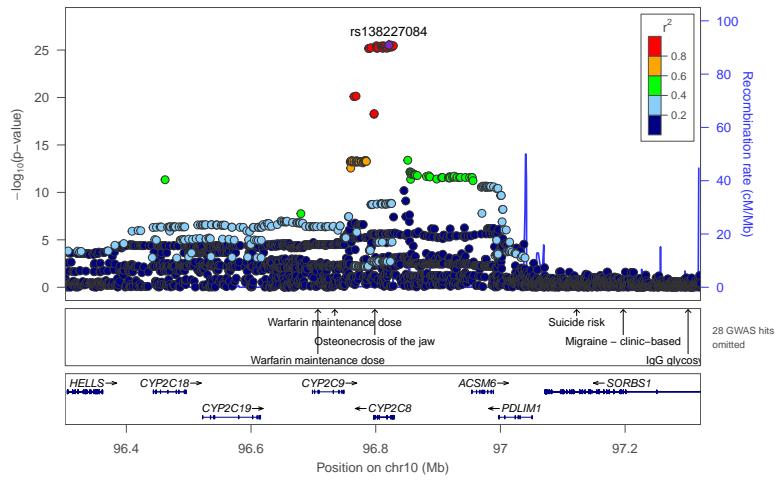

X - 17357

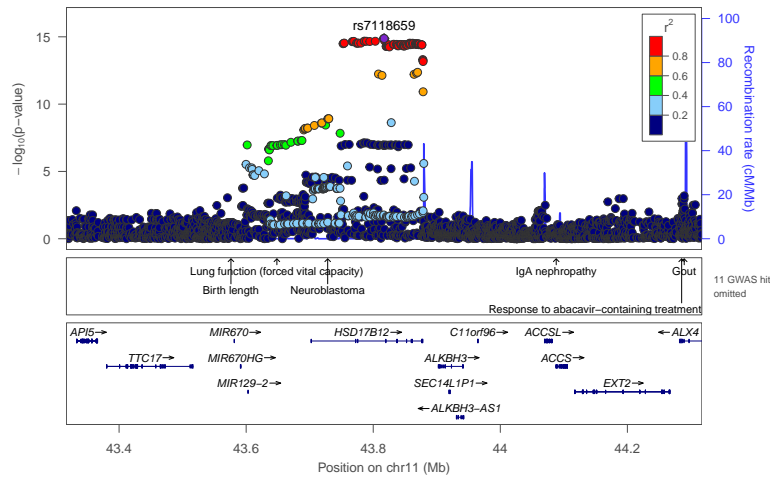

N-acetylglucosaminylasparagine

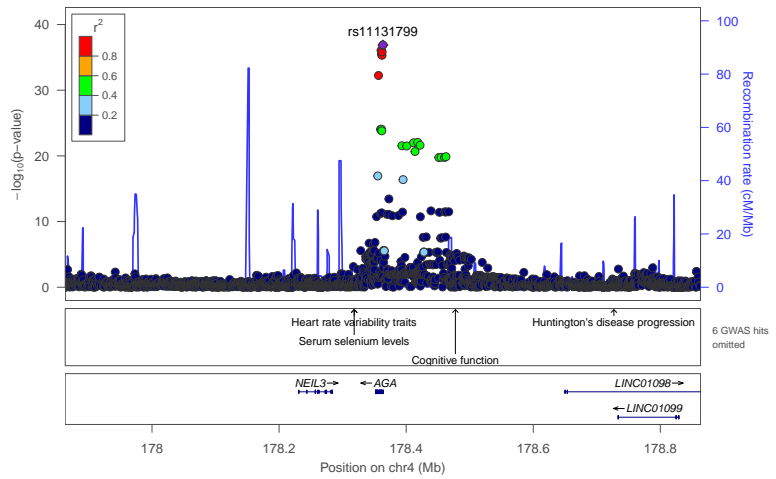

N-acetylglucosaminylasparagine

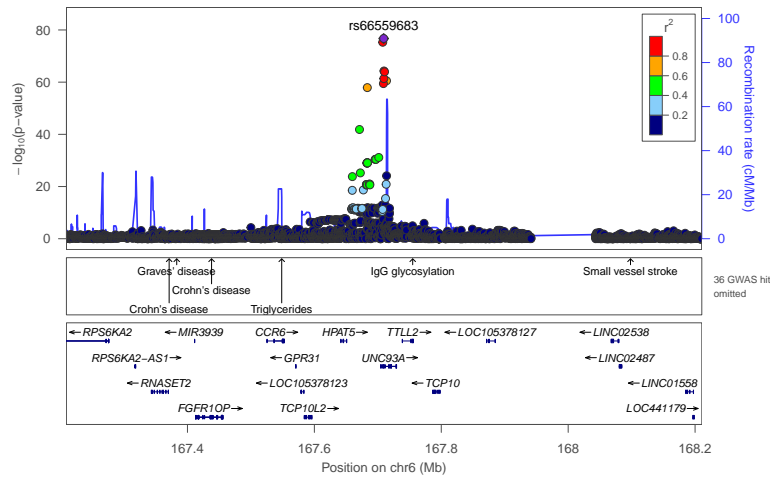

N-acetylglucosaminylasparagine

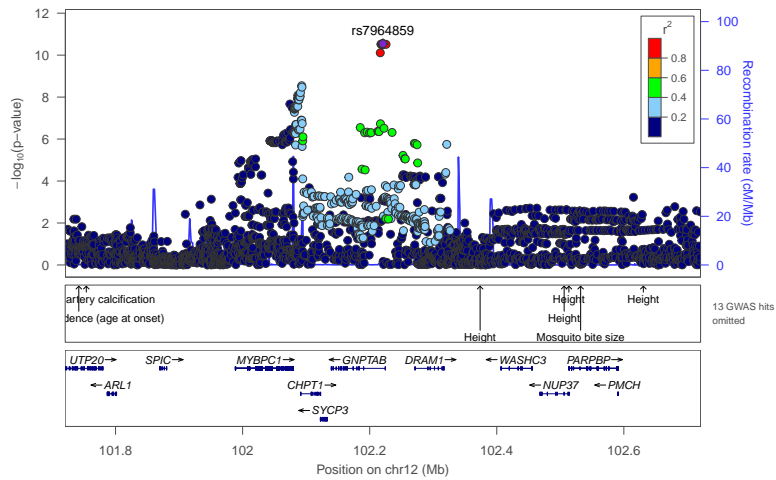

mannose

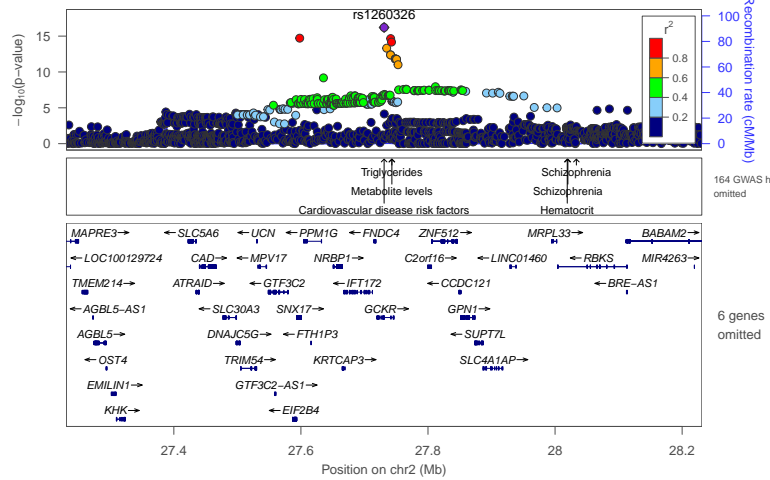

### N-acetyltaurine

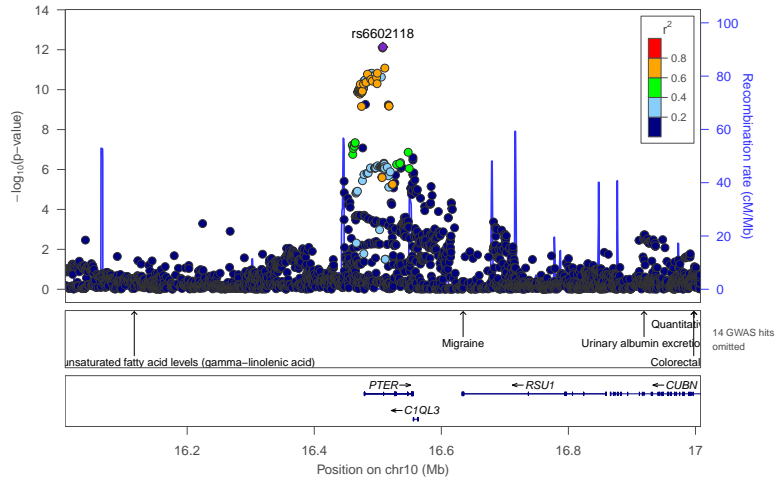

### 1-oleoyl-GPC (18:1)

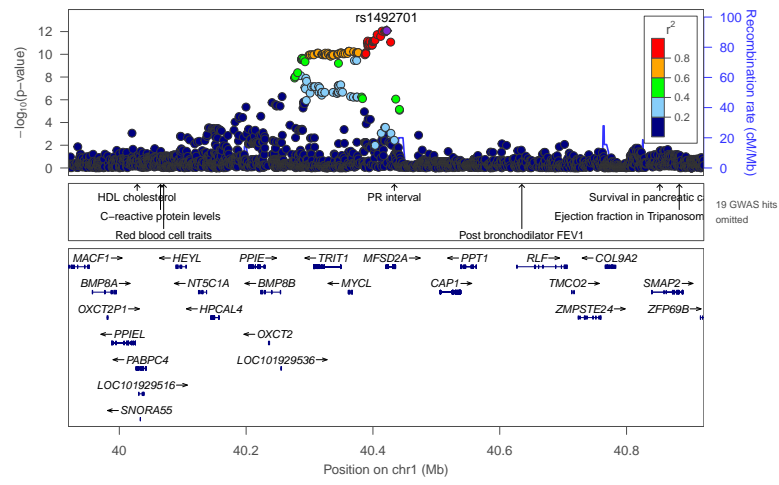

### N-acetylcitrulline

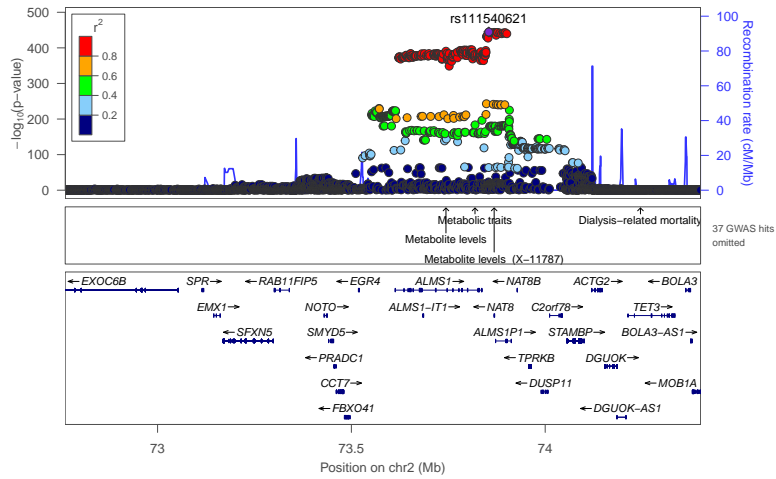

### 4-hydroxychlorothalonil

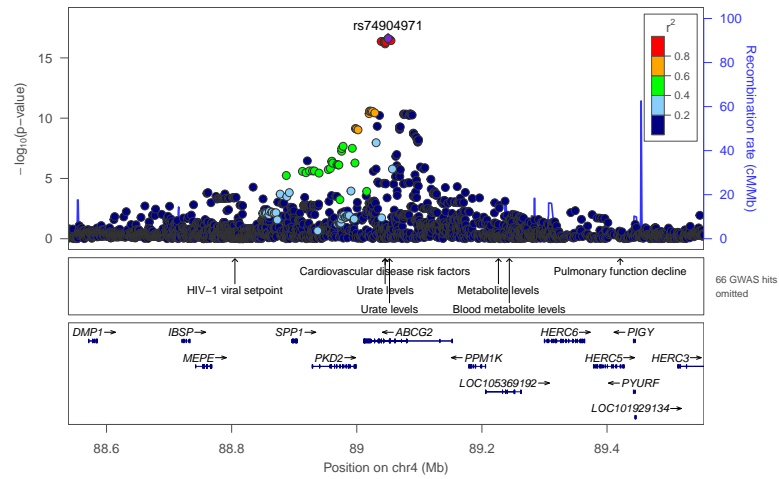

### sphingomyelin (d18:1/20:0, d16:1/22:0)\*

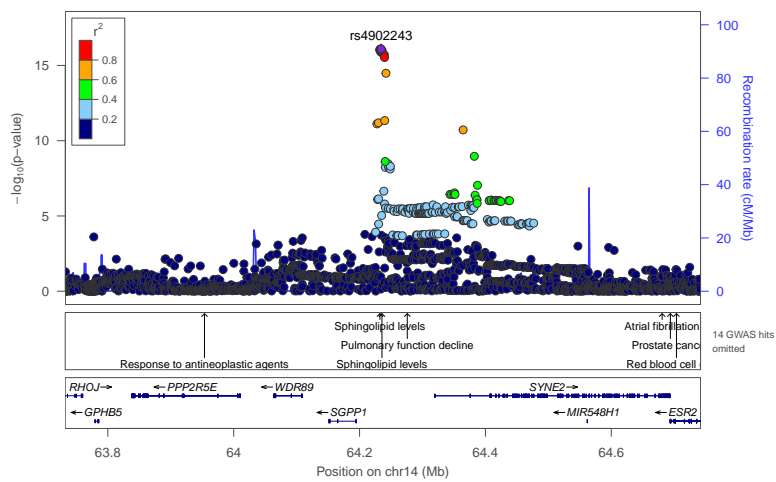

### sphingomyelin (d18:1/20:0, d16:1/22:0)\*

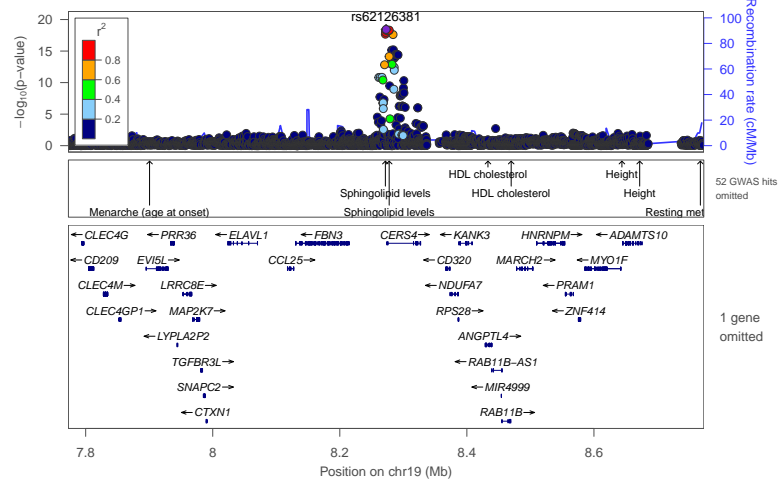



sphingomyelin (d18:1/20:0, d16:1/22:0)\*

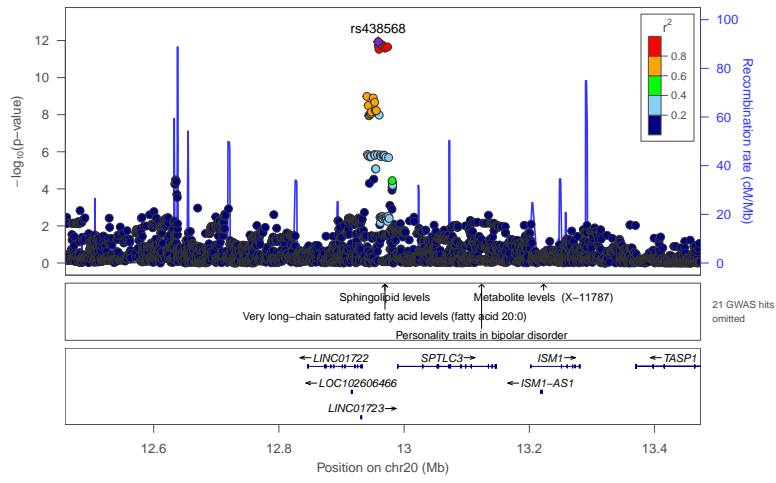

sphingomyelin (d18:1/20:1, d18:2/20:0)\*

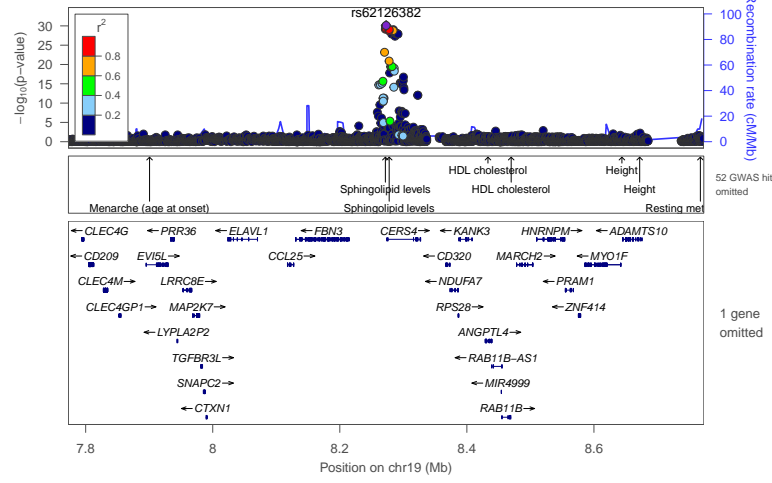

sphingomyelin (d18:1/22:1, d18:2/22:0, d16:1/24:1)\*

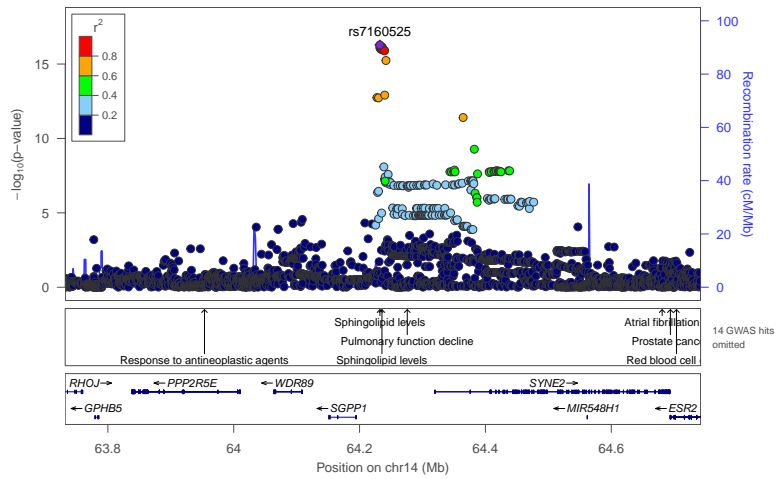

maltol sulfate

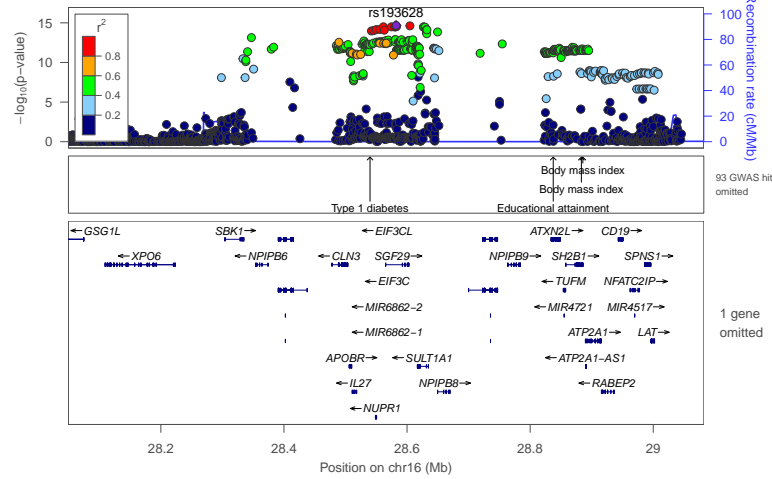

N-acetylkynurenine (2)

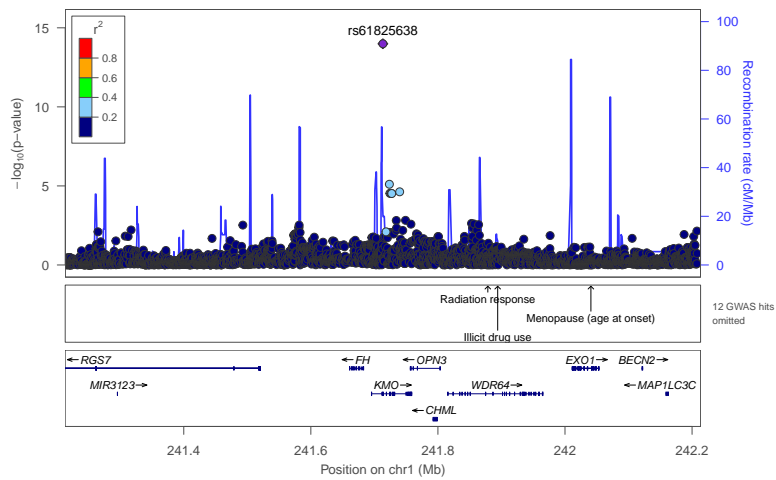

N-acetylkynurenine (2)

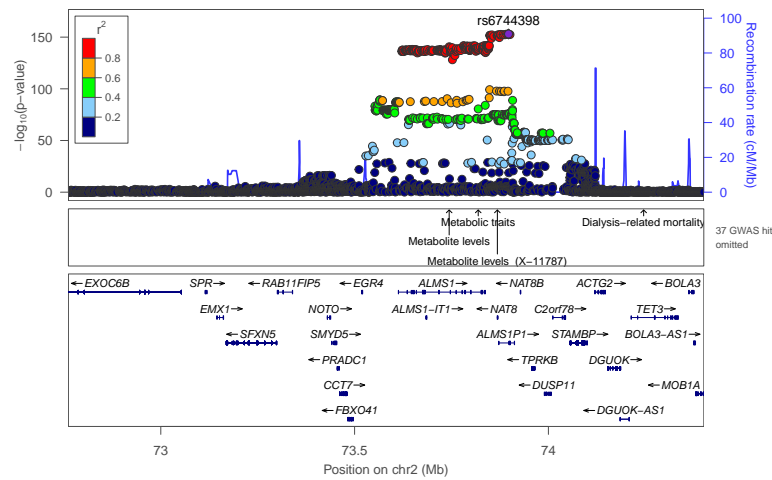

### N-acetylkynurenine (2)

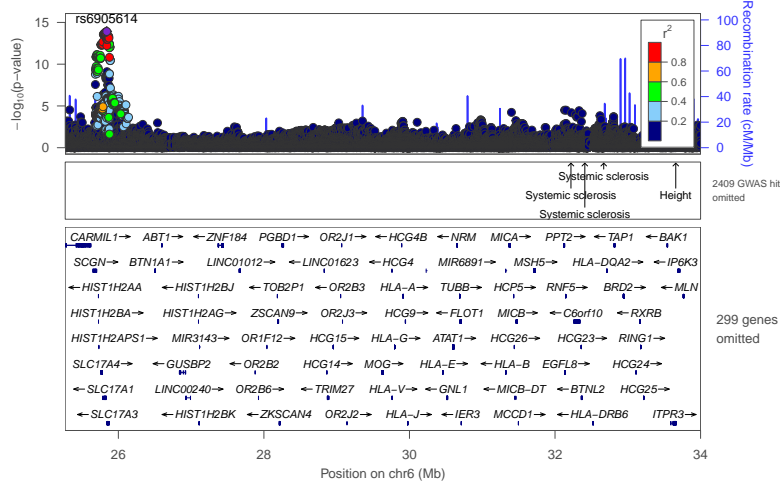

### N-acetylkynurenine (2)

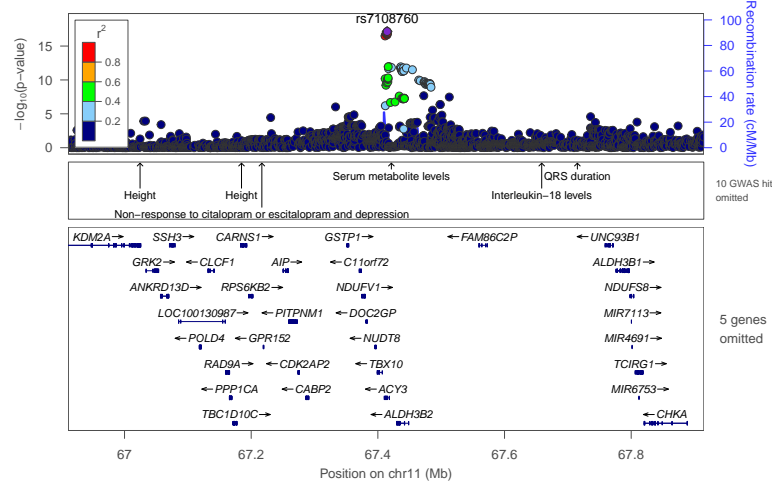

### X - 23636

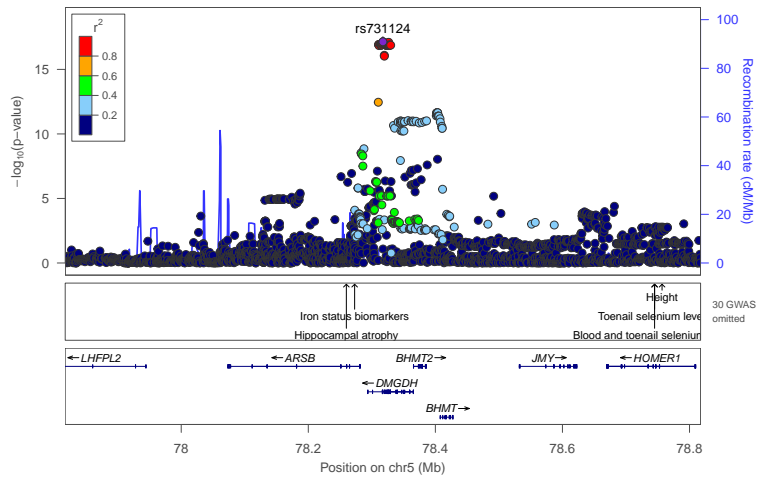

### X - 23636

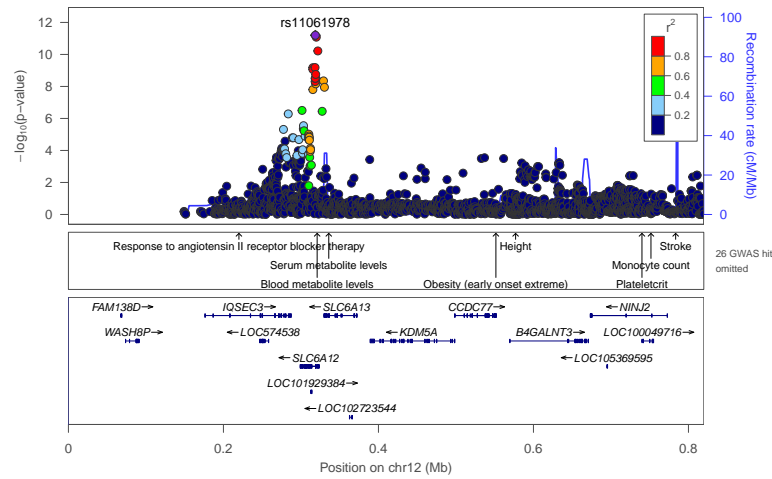

### X - 23641

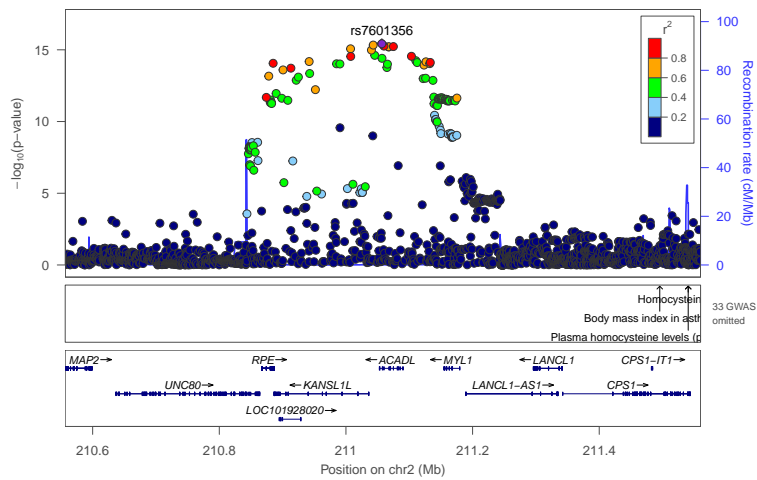

### X - 23641

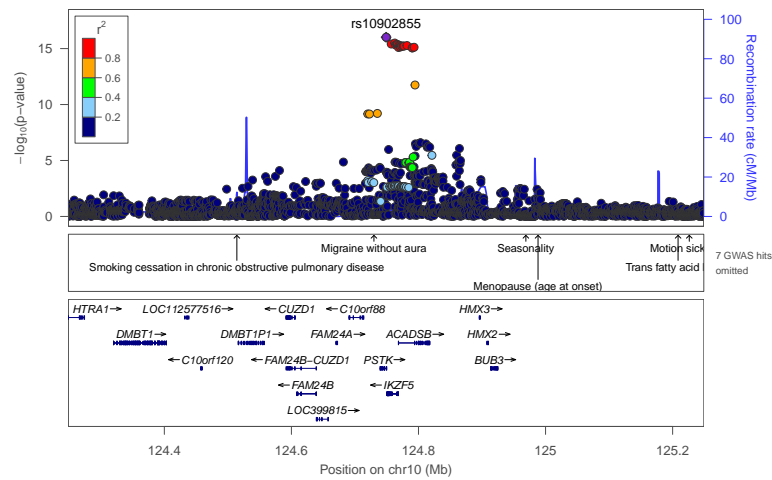

X - 23659

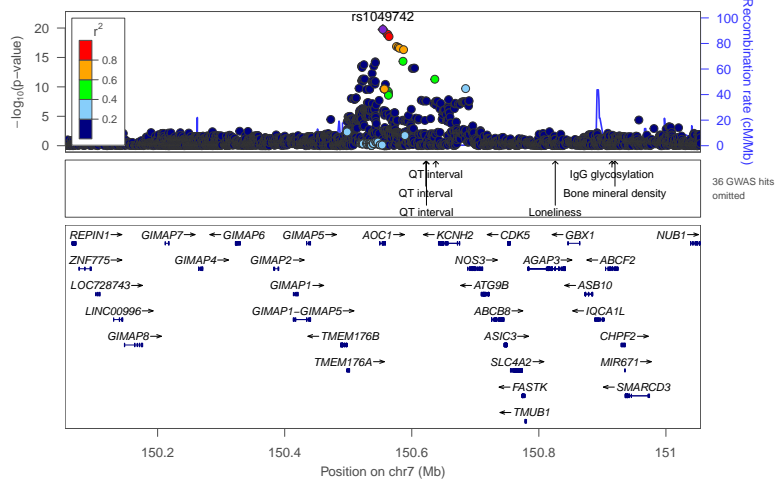

X - 23680

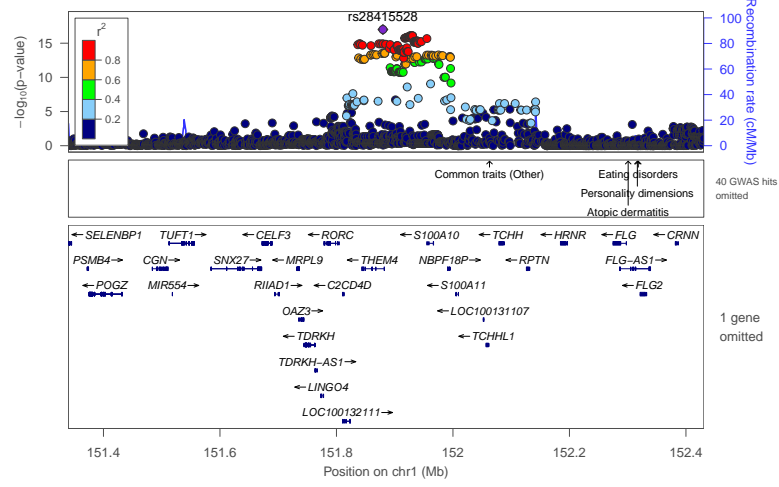

X - 23739

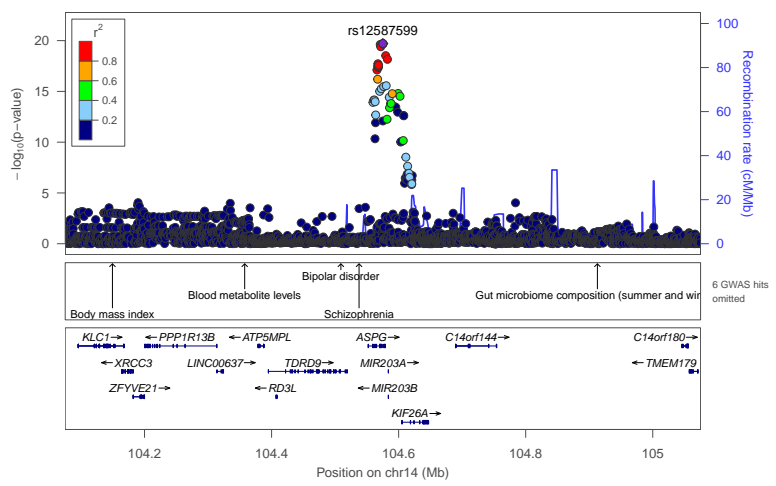

X - 23780

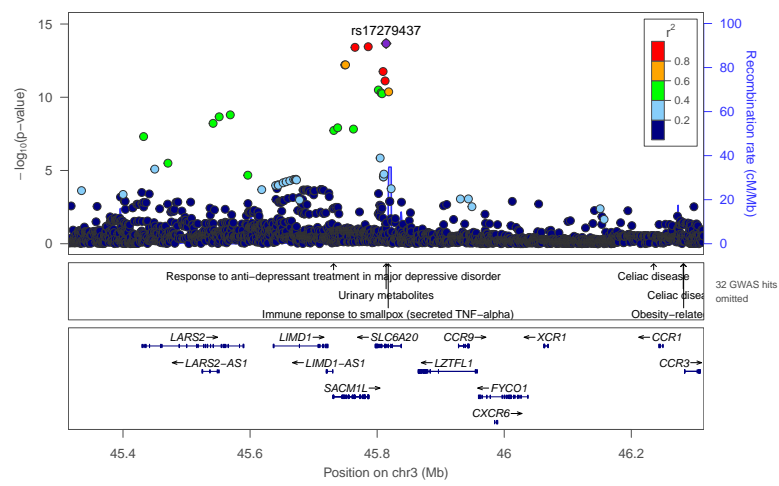

dimethylglycine

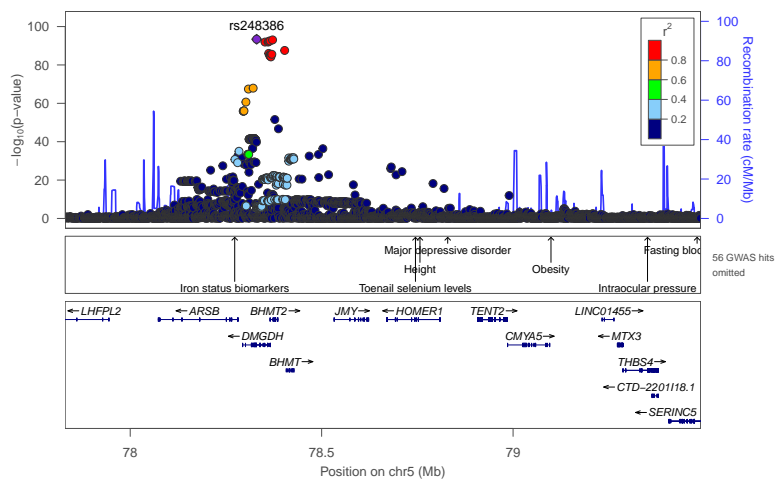

dimethylglycine

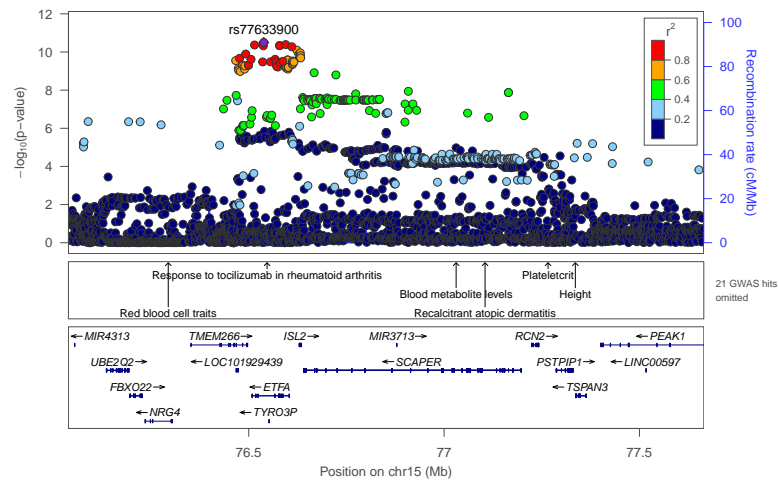

### asparagine

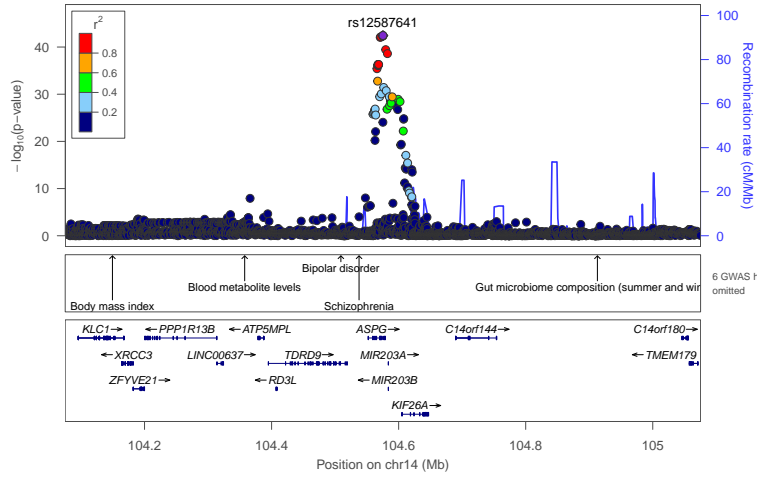

### X - 23983

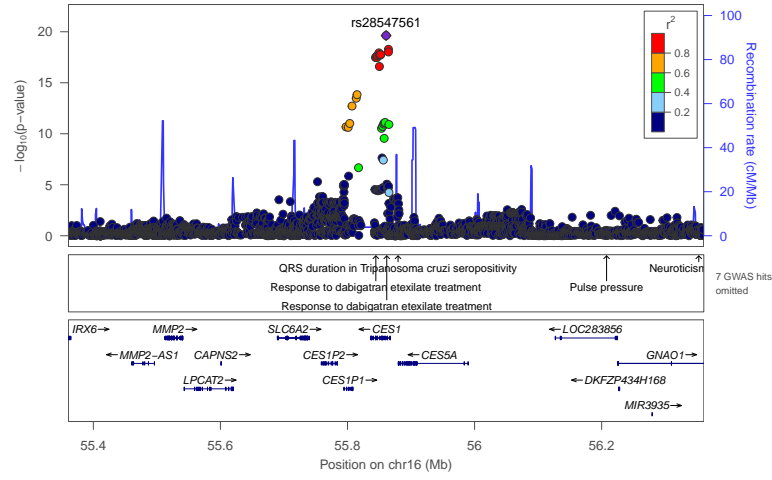

### glycosyl-N-stearoyl-sphingosine (d18:1/18:0)

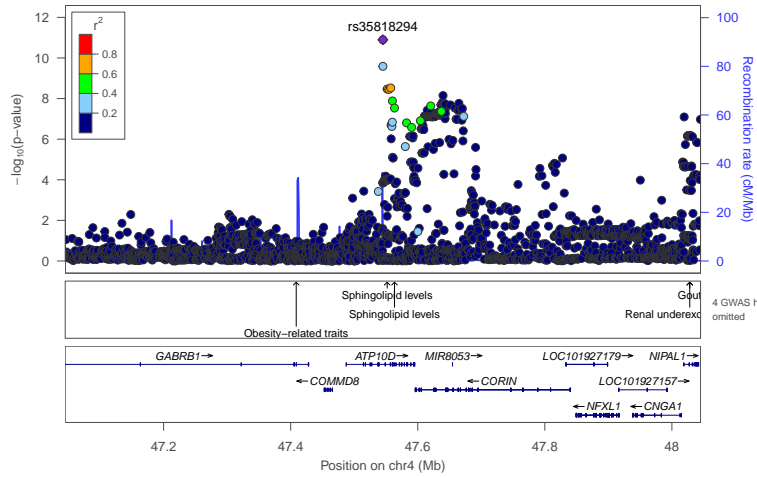

### glycosyl-N-stearoyl-sphingosine (d18:1/18:0)

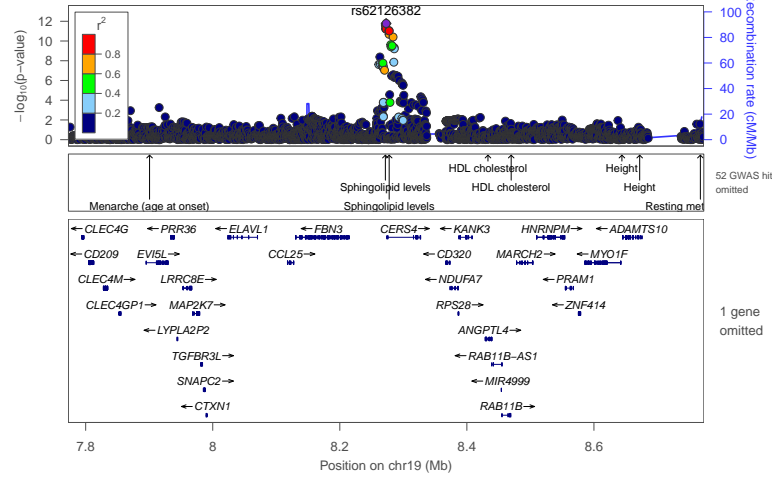

### 2-hydroxyglutarate

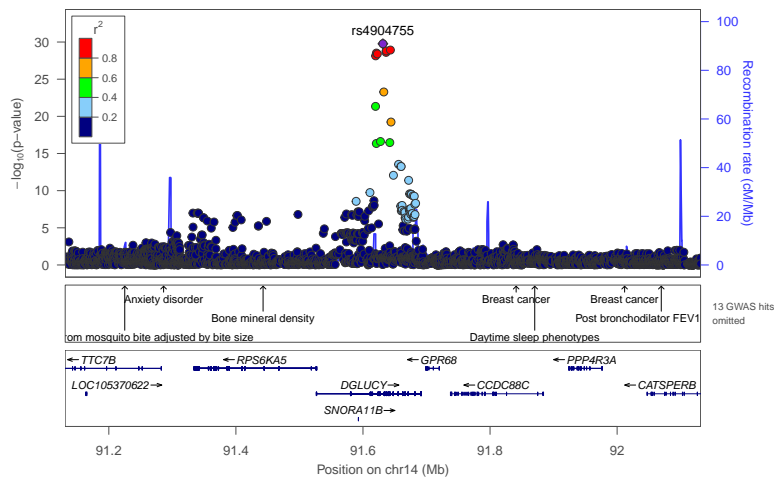

### sphingomyelin (d17:1/16:0, d18:1/15:0, d16:1/17:0)\*

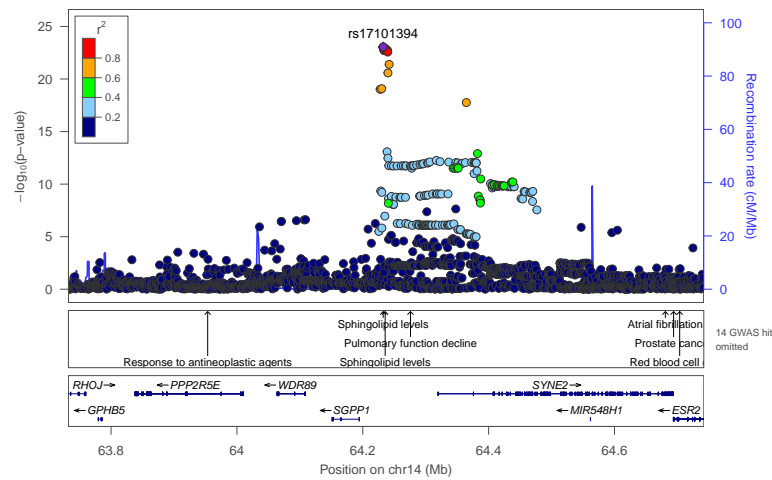

1-stearoyl-2-linoleoyl-GPE (18:0/18:2)\*

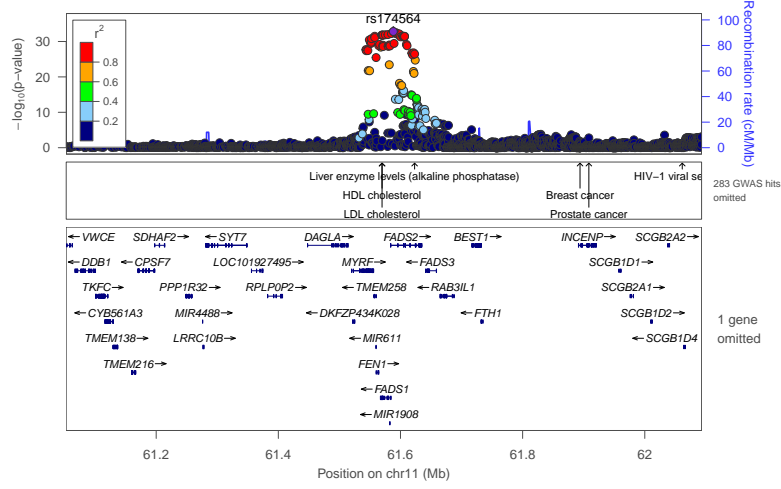

1-stearoyl-2-linoleoyl-GPE (18:0/18:2)\*

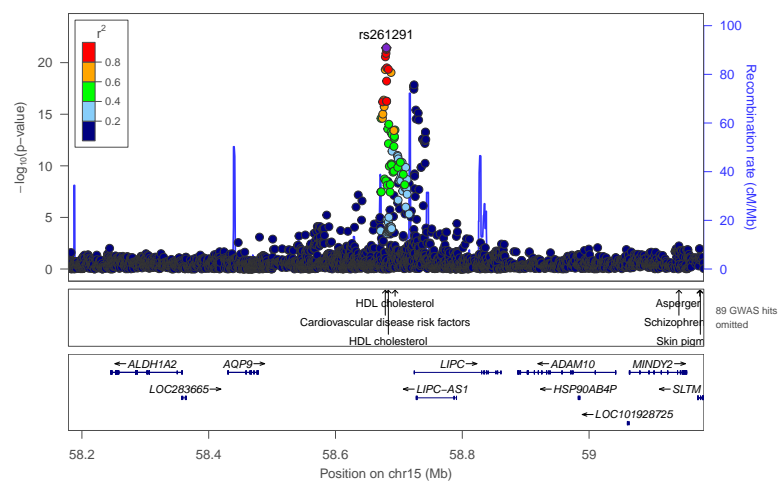

1-stearoyl-2-arachidonoyl-GPE (18:0/20:4)

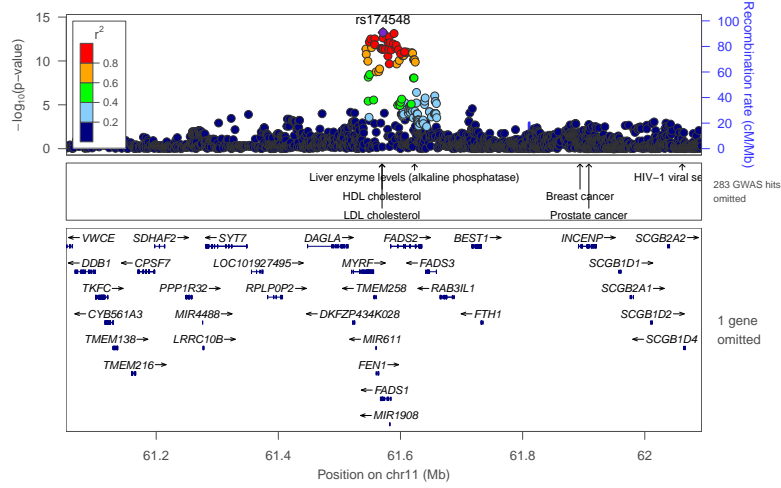

1-stearoyl-2-arachidonoyl-GPE (18:0/20:4)

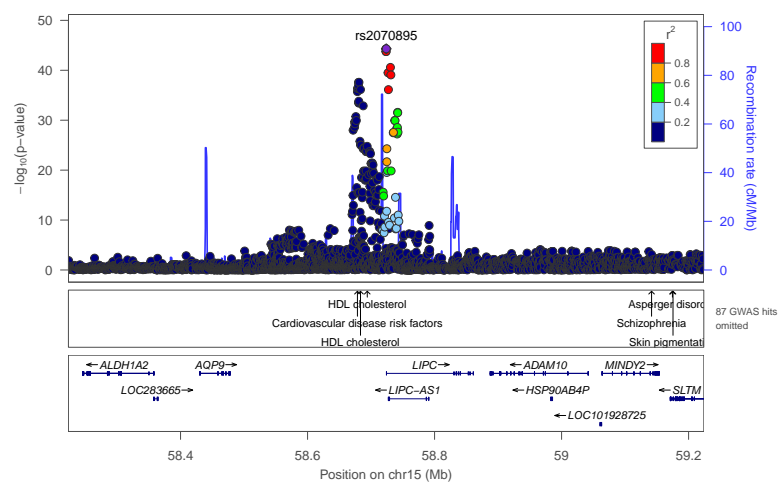

1-stearoyl-2-arachidonoyl-GPI (18:0/20:4)

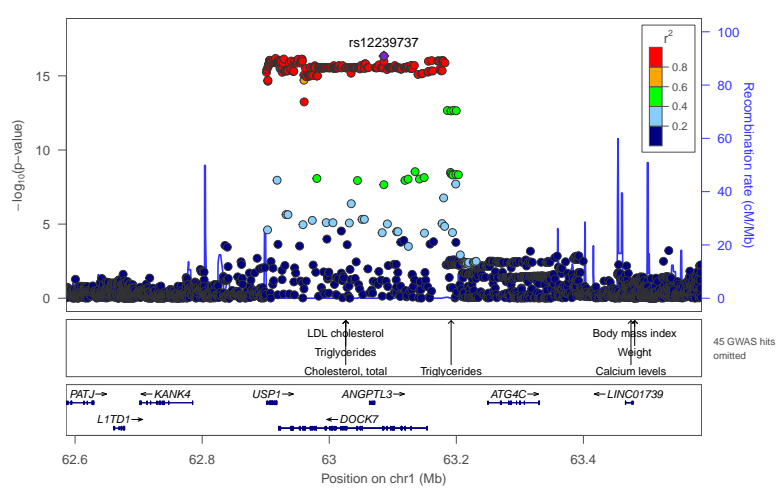

1-stearoyl-2-arachidonoyl-GPI (18:0/20:4)

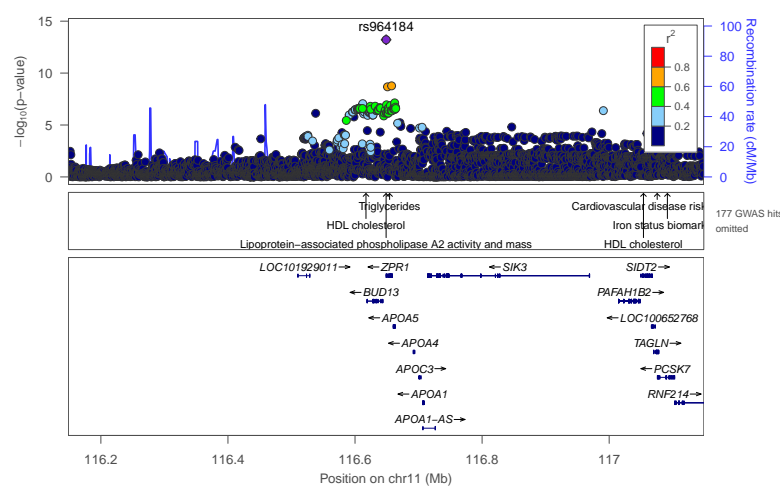

### 1-stearoyl-2-arachidonoyl-GPI (18:0/20:4)

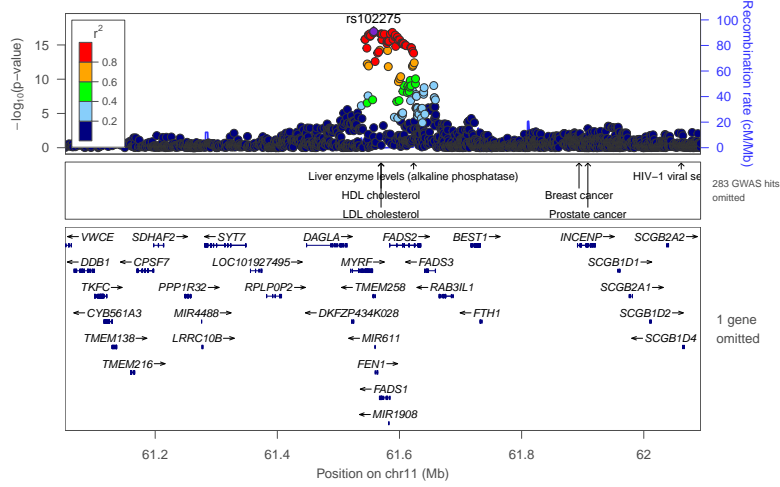

### 1-stearoyl-2-arachidonoyl-GPI (18:0/20:4)

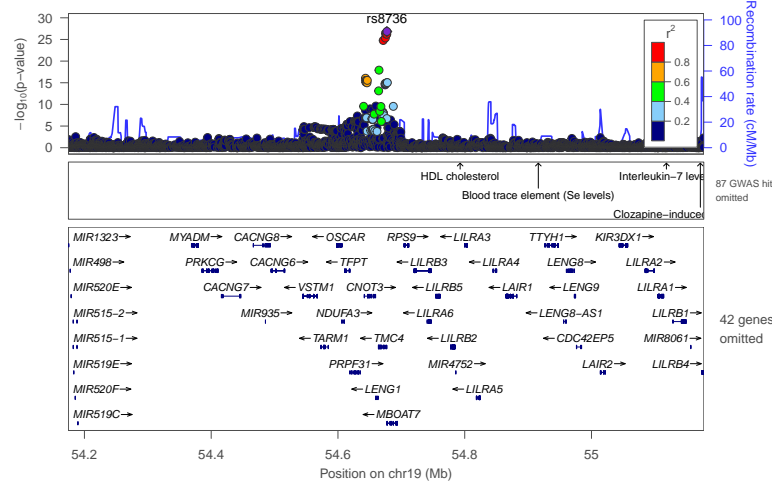

### 1-palmitoyl-2-linoleoyl-GPI (16:0/18:2)

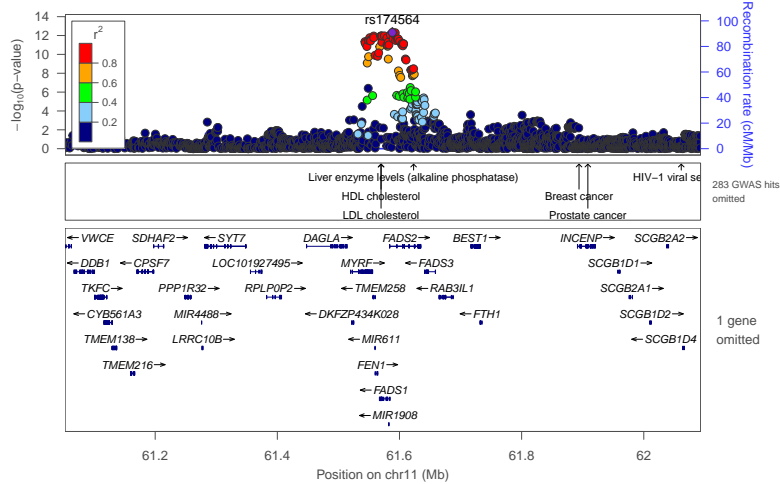

### 1-palmitoyl-2-linoleoyl-GPI (16:0/18:2)

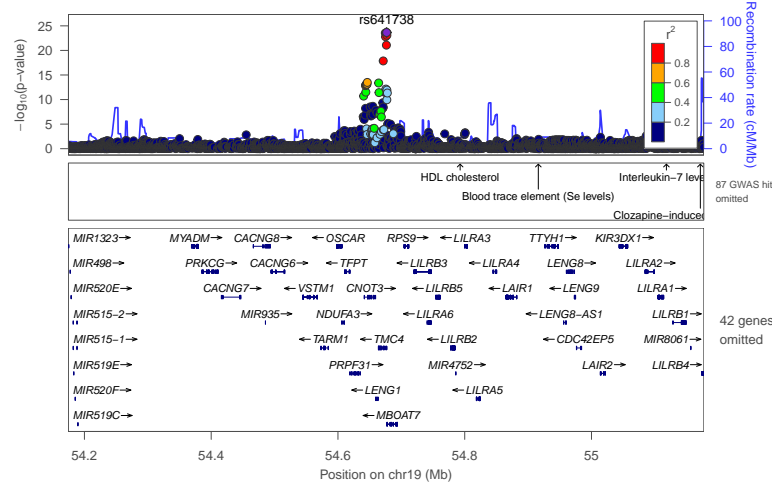

### 1-stearoyl-2-linoleoyl-GPC (18:0/18:2)\*

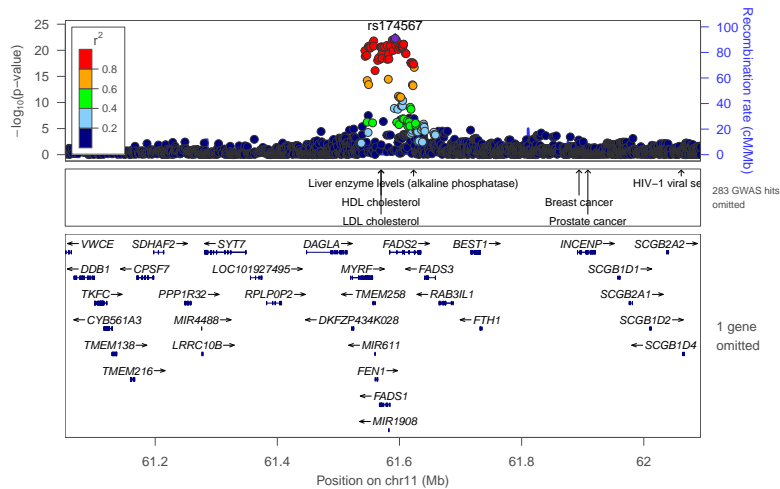

### 1-palmitoyl-2-dihomo-linolenoyl-GPC (16:0/20:3n3 or 6)\*

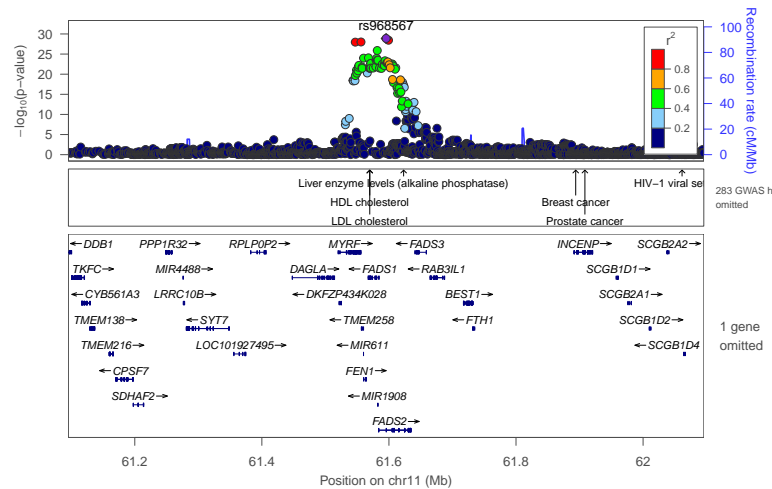



### 1-palmitoyl-2-dihomo-linolenoyl-GPC (16:0/20:3n3 or 6)\*

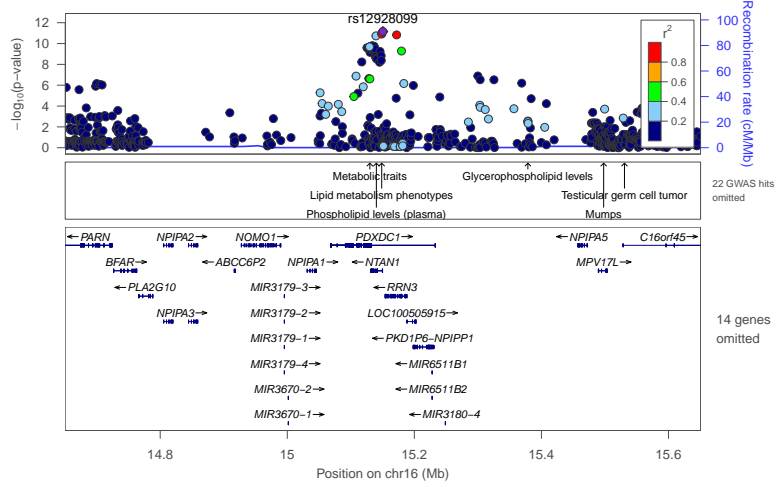

### 1-palmitoyl-2-arachidonoyl-GPC (16:0/20:4n6)

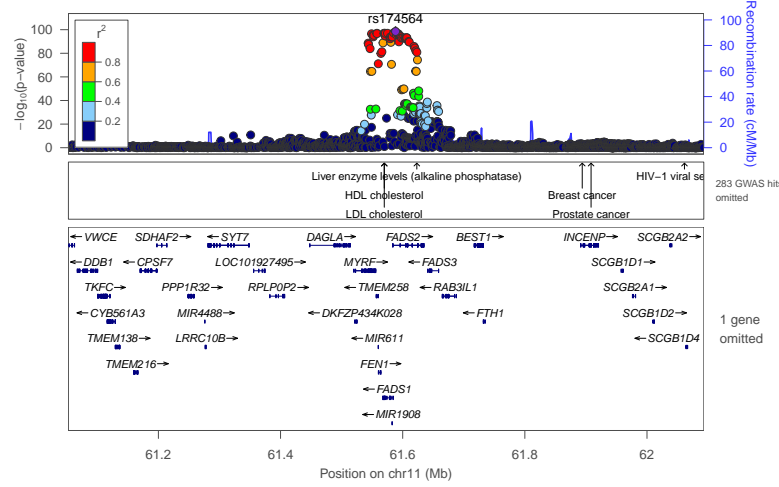

### 1-palmitoyl-2-arachidonoyl-GPE (16:0/20:4)\*

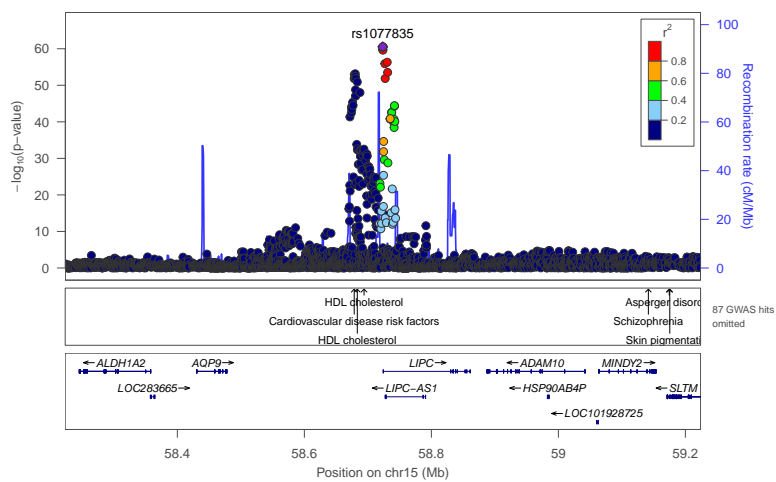

### 1-palmitoyl-2-docosahexaenoyl-GPE (16:0/22:6)\*

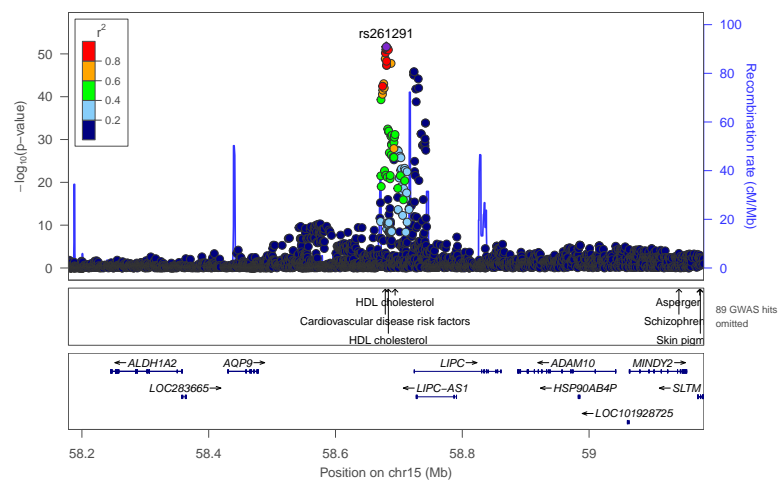

### 1-stearoyl-2-docosahexaenoyl-GPE (18:0/22:6)\*

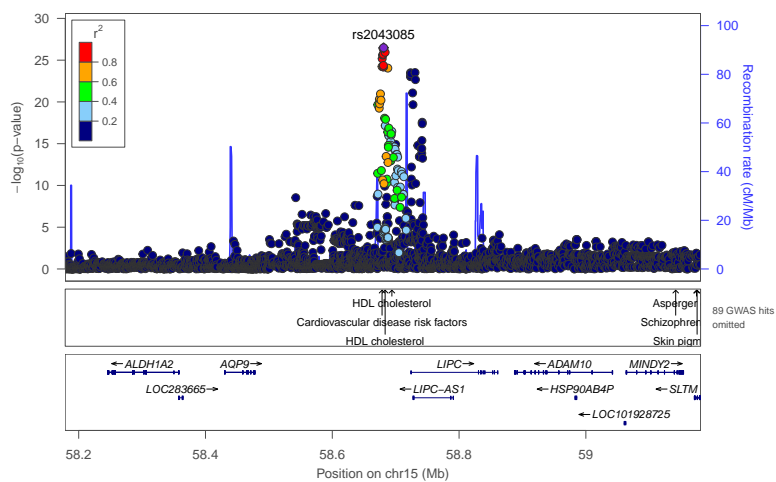

### 1-stearoyl-2-linoleoyl-GPI (18:0/18:2)

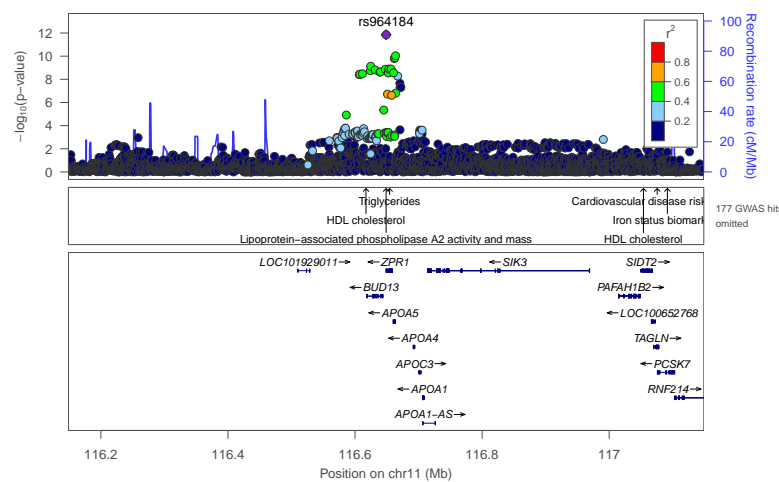

1-stearoyl-2-linoleoyl-GPI (18:0/18:2)

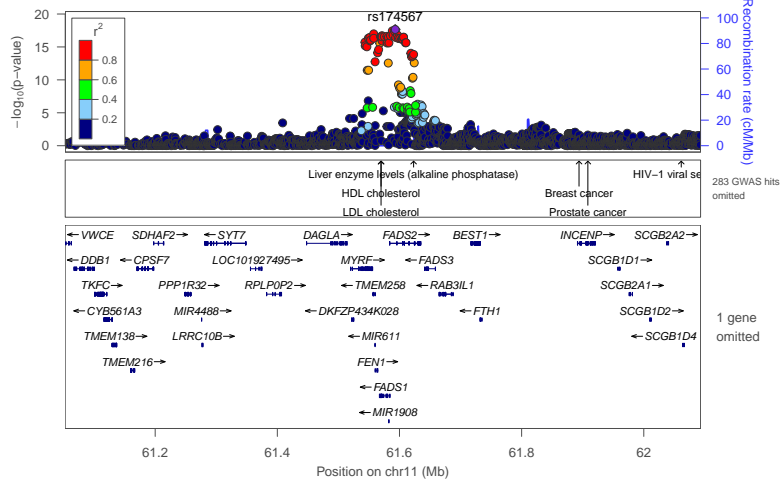

1-stearoyl-2-linoleoyl-GPI (18:0/18:2)

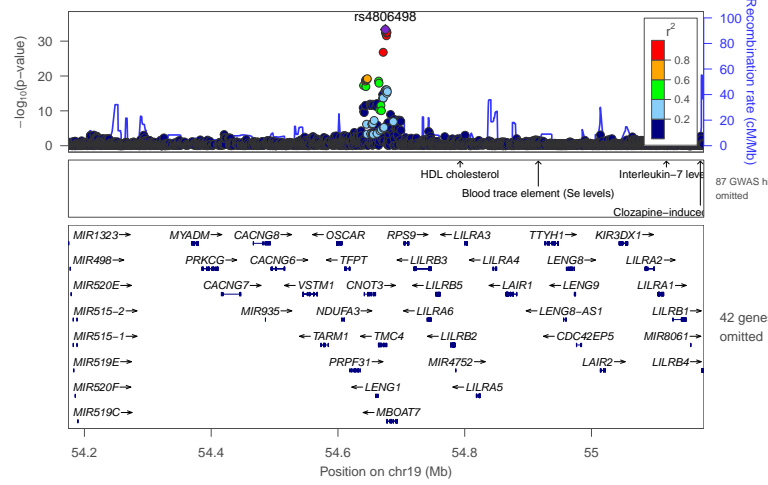

1-(1-enyl-palmitoyl)-GPC (P-16:0)\*

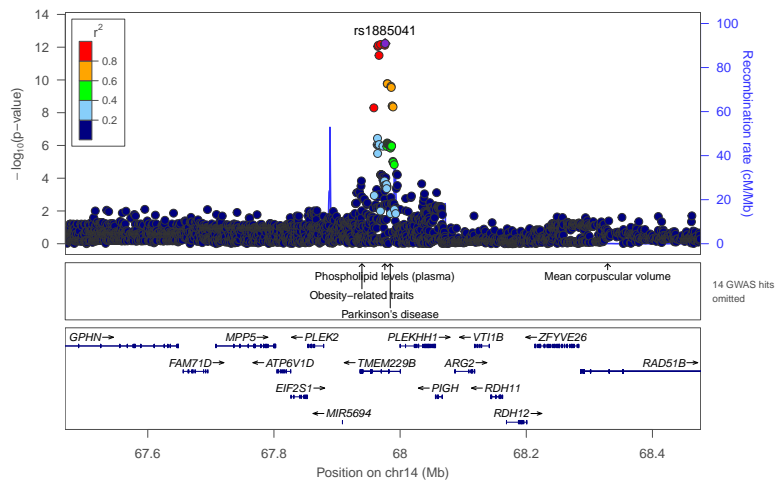

1-(1-enyl-stearoyl)-2-arachidonoyl-GPE (P-18:0/20:4)\*

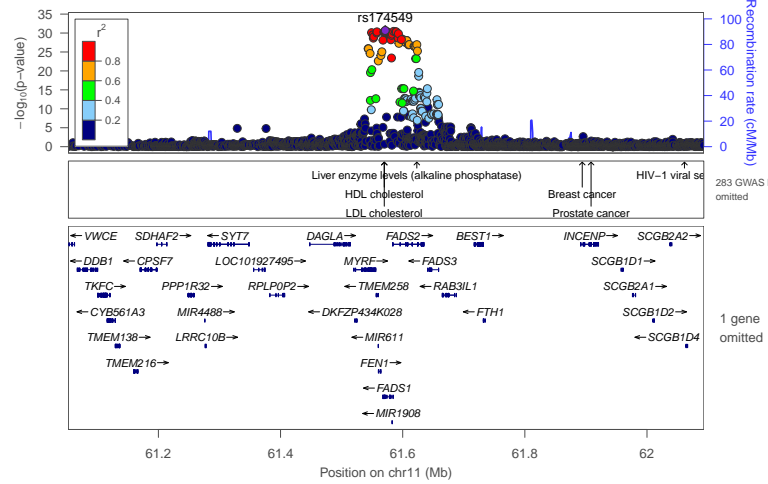

1-(1-enyl-palmitoyl)-2-oleoyl-GPC (P-16:0/18:1)\*

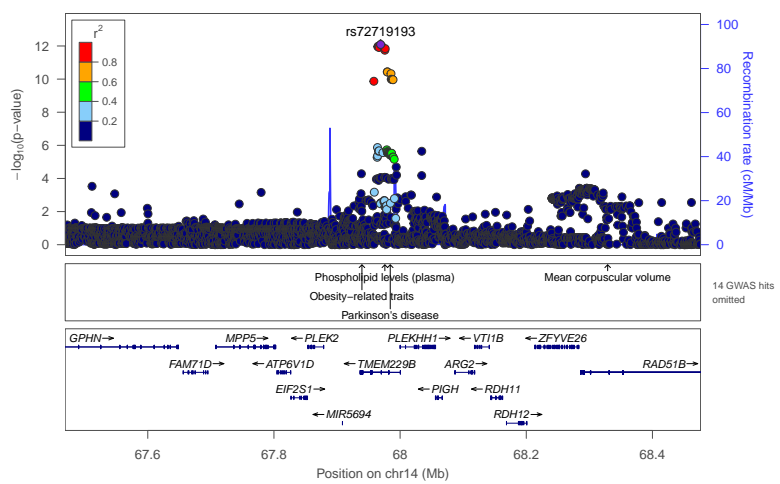

sphingomyelin (d18:1/21:0, d17:1/22:0, d16:1/23:0)\*

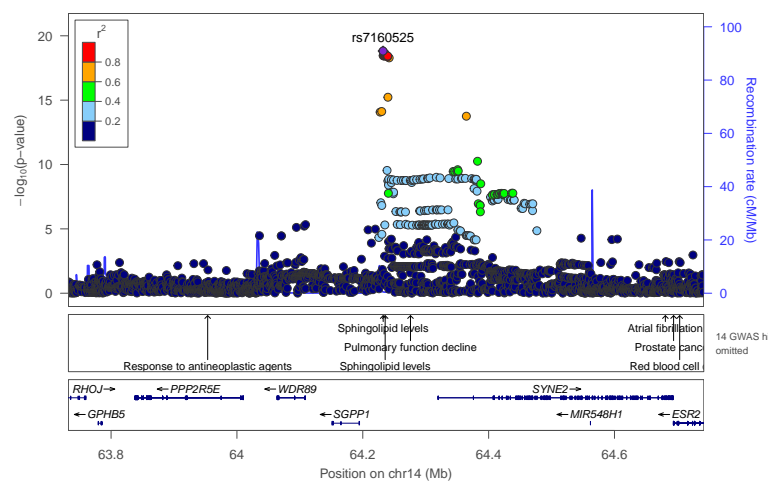

sphingomyelin (d18:1/21:0, d17:1/22:0, d16:1/23:0)\*

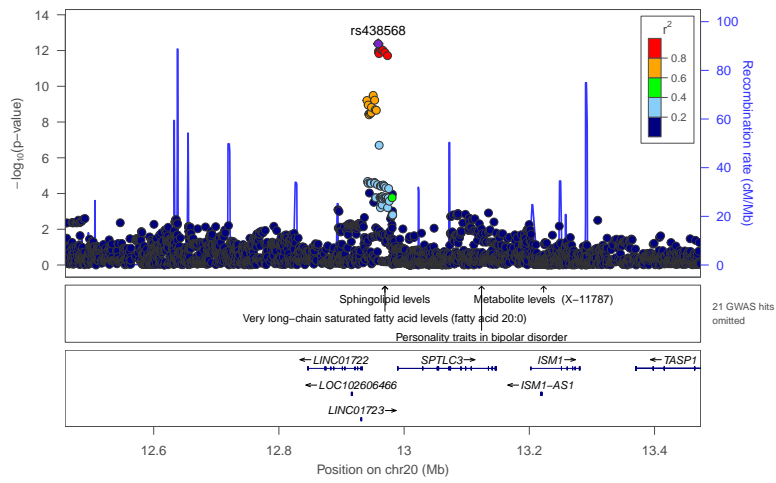

X - 24337

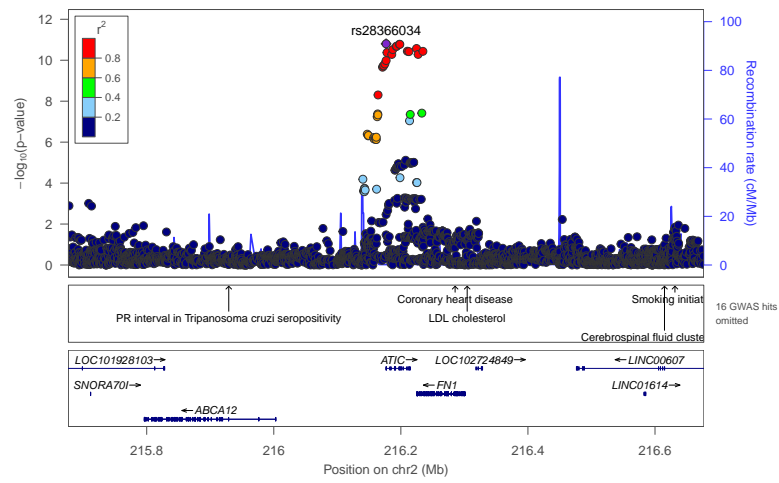

2'-deoxyuridine

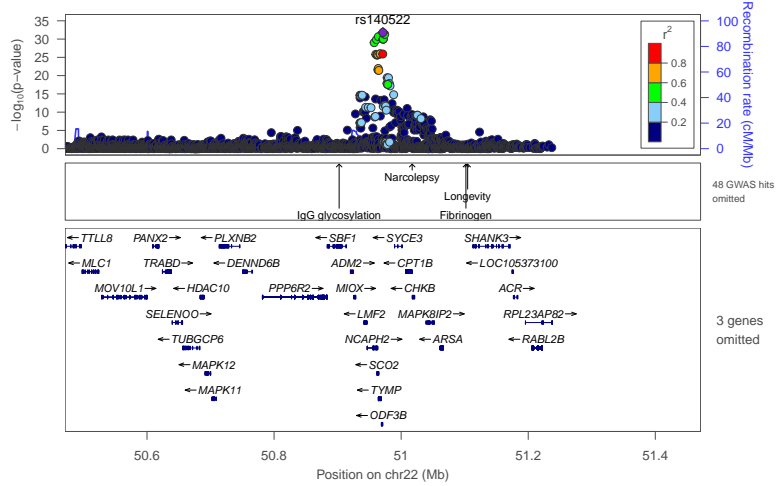

1,2-dilinoleoyl-GPC (18:2/18:2)

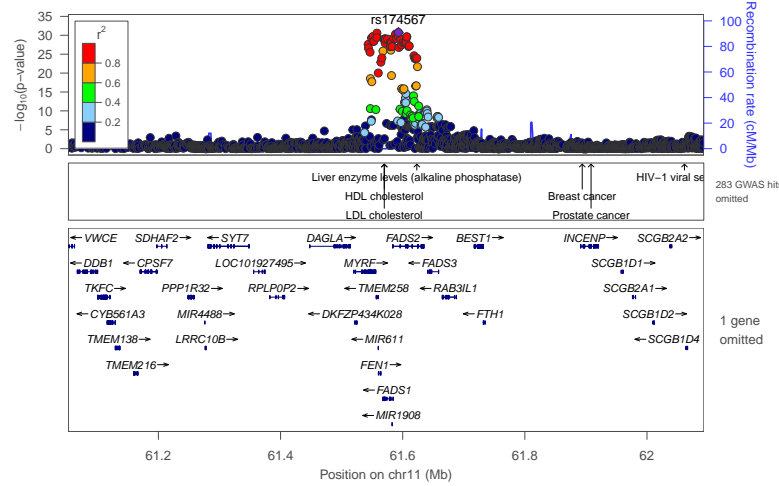

N-palmitoyl-sphinganine (d18:0/16:0)

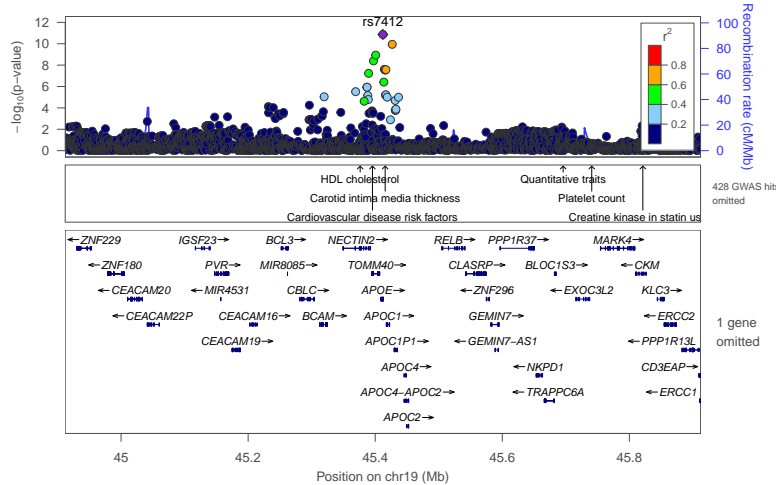

1-stearoyl-2-docosahexaenoyl-GPC (18:0/22:6)

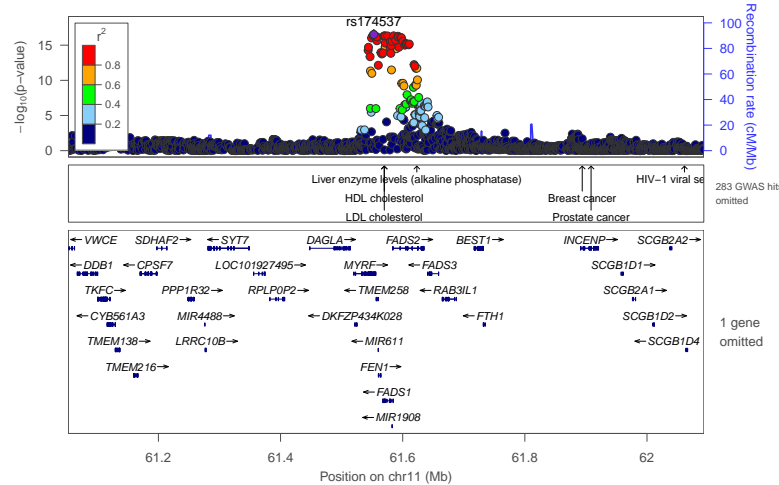

X - 24422

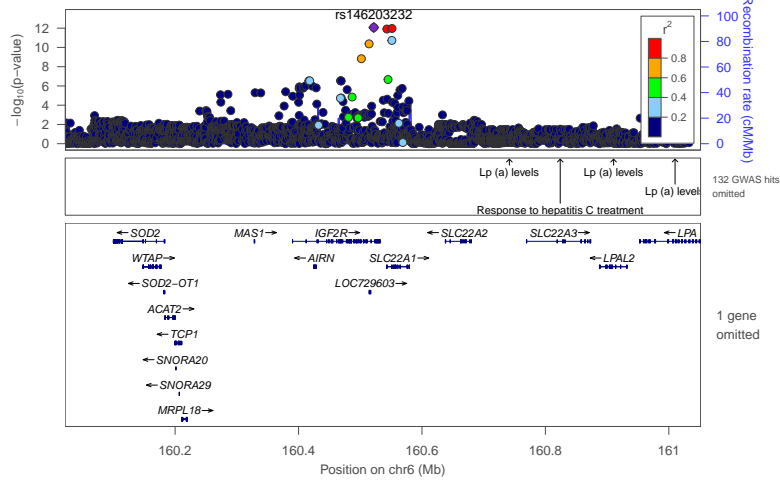

X - 24418

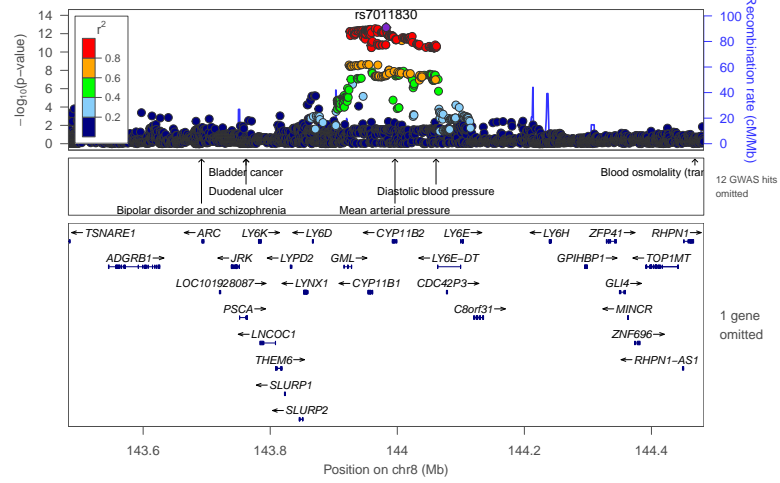

X - 24418

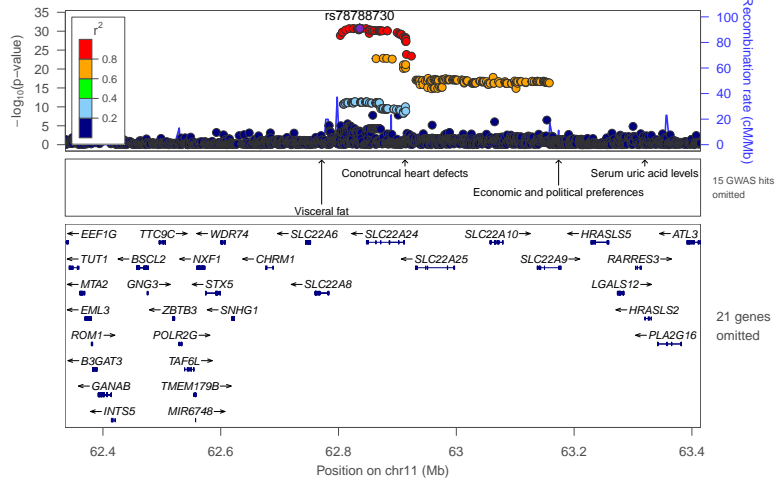

1-palmitoyl-2-oleoyl-GPI (16:0/18:1)\*

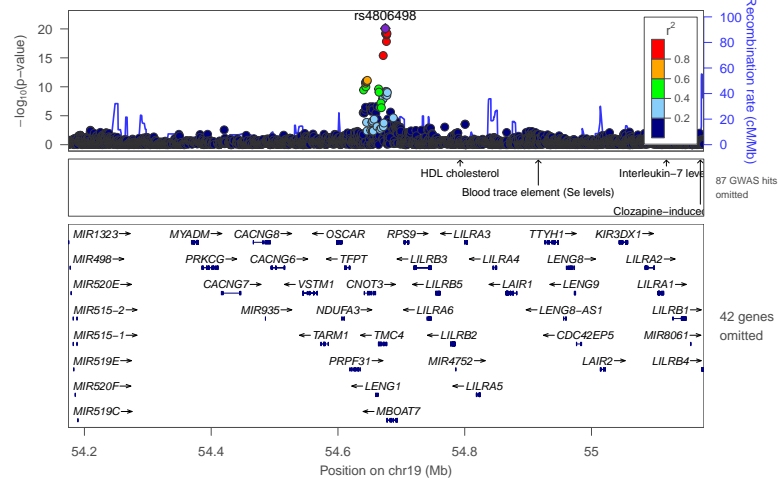

1-oleoyl-2-linoleoyl-GPE (18:1/18:2)\*

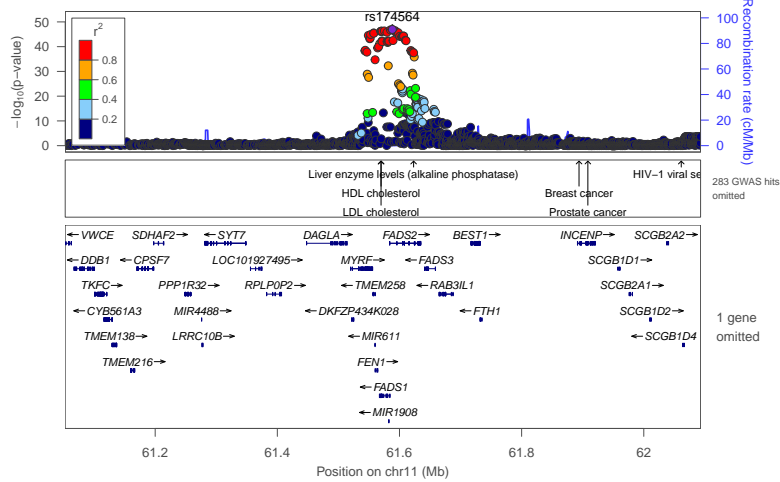

1-oleoyl-2-linoleoyl-GPE (18:1/18:2)\*

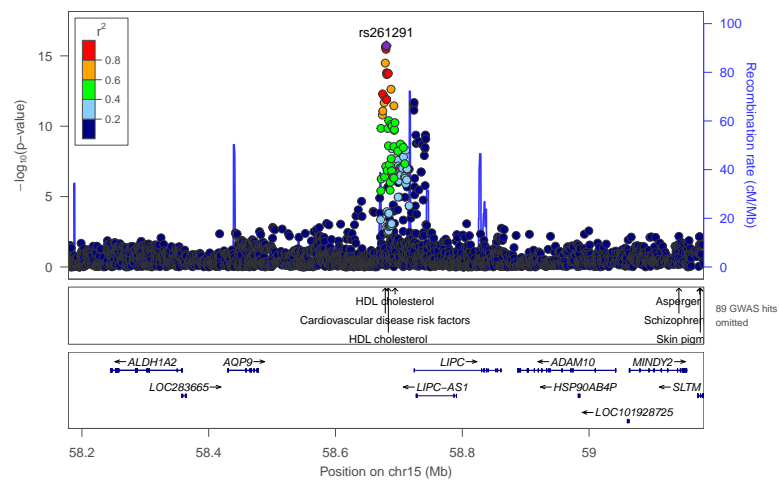

1-(1-enyl-palmitoyl)-2-arachidonoyl-GPC (P-16:0/20:4)\*

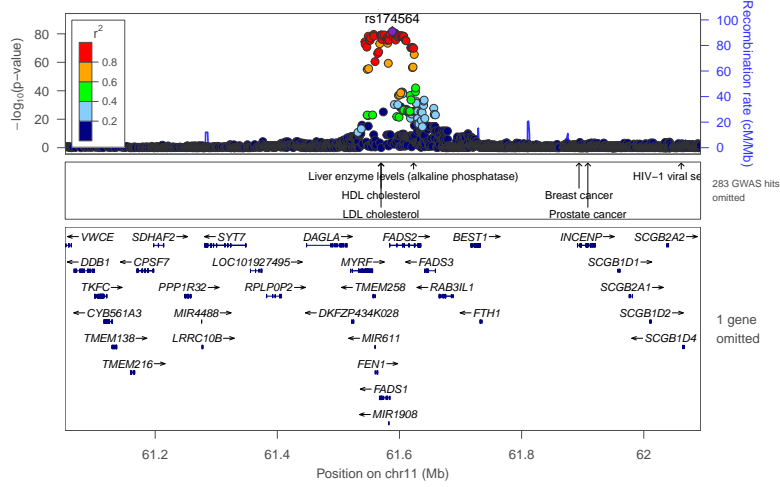

1-(1-enyl-palmitoyl)-2-arachidonoyl-GPC (P-16:0/20:4)\*

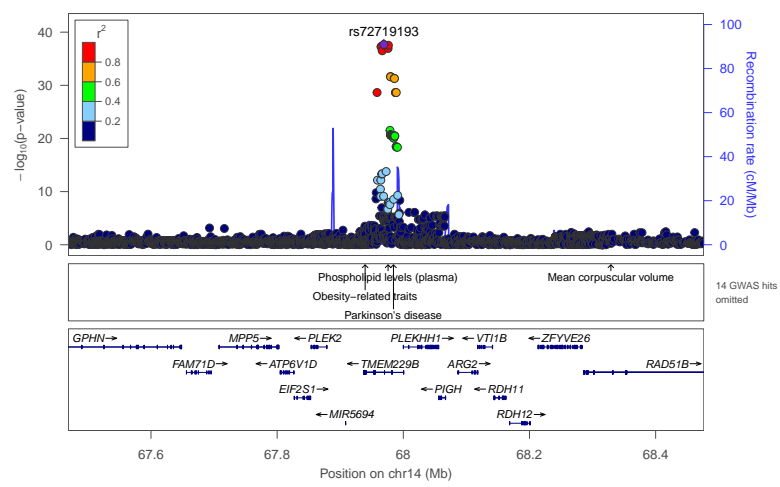

1-linoleoyl-2-arachidonoyl-GPC (18:2/20:4n6)\*

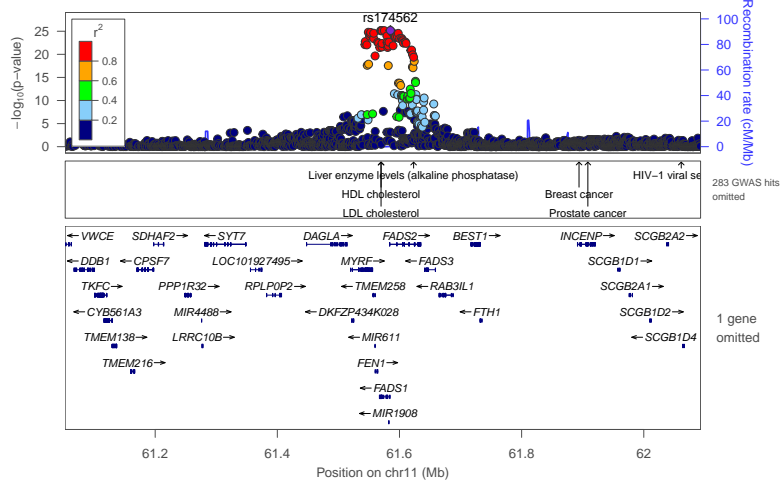

1-(1-enyl-palmitoyl)-2-palmitoyl-GPC (P-16:0/16:0)\*

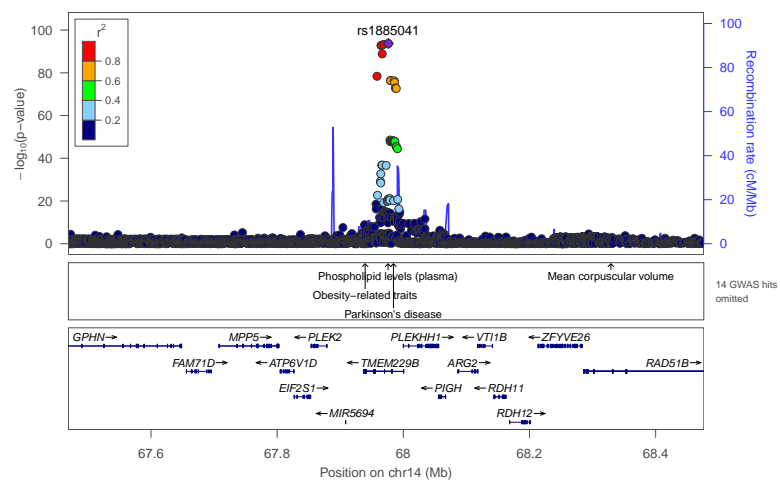

1-(1-enyl-palmitoyl)-2-palmitoyl-GPC (P-16:0/16:0)\*

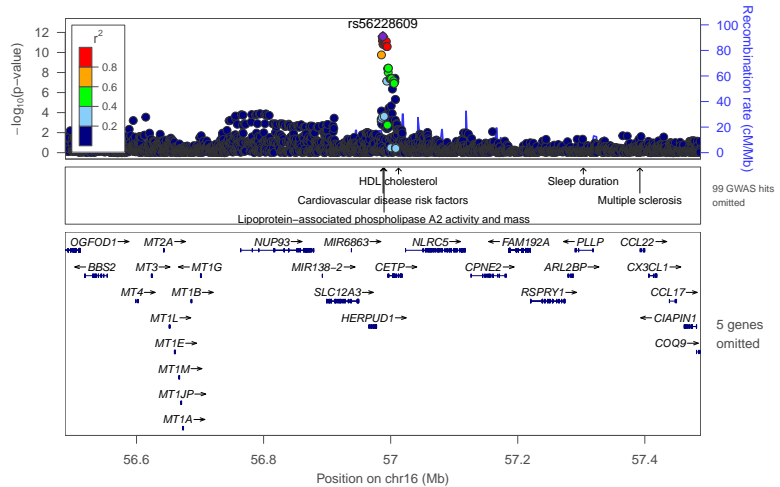

1-stearoyl-2-oleoyl-GPI (18:0/18:1)\*

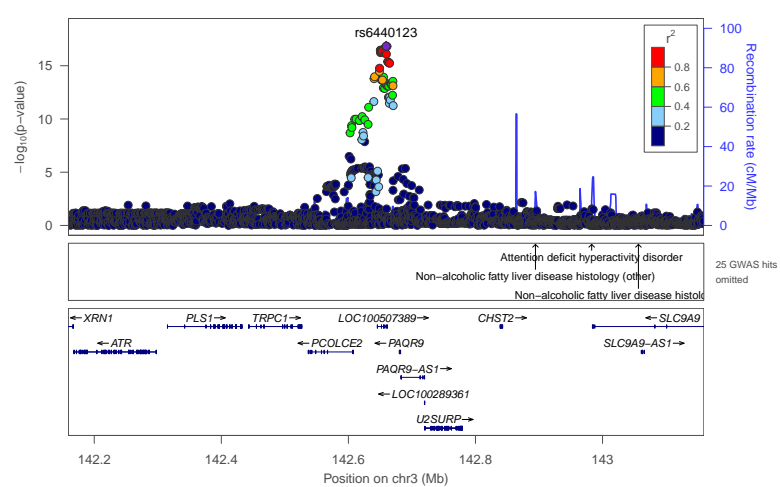

1-stearoyl-2-oleoyl-GPI (18:0/18:1)\*

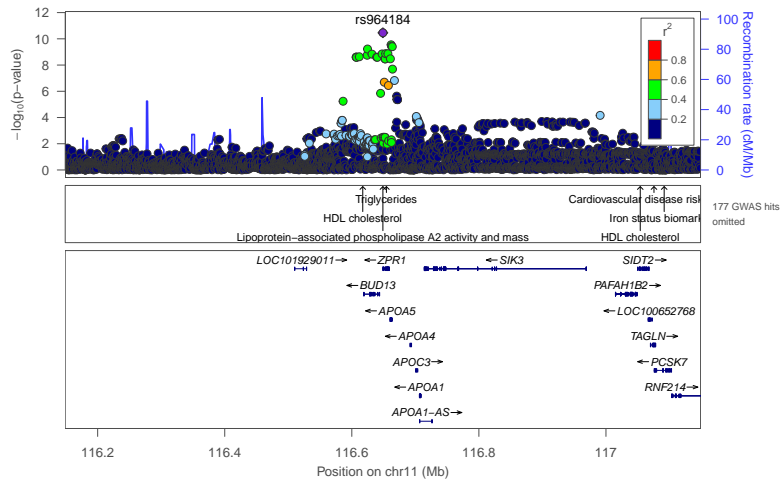

1-stearoyl-2-oleoyl-GPI (18:0/18:1)\*

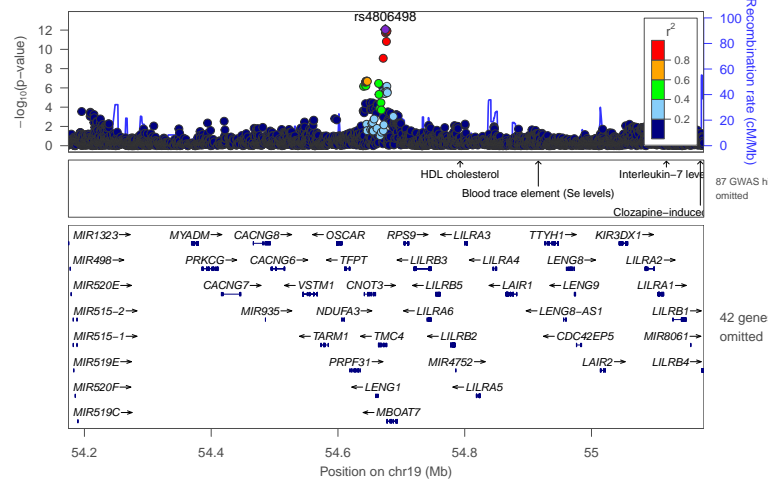

X - 24462

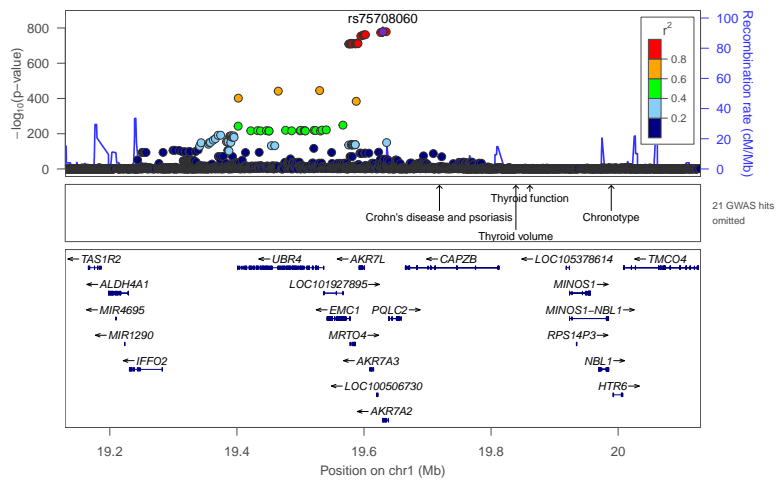

X - 24462

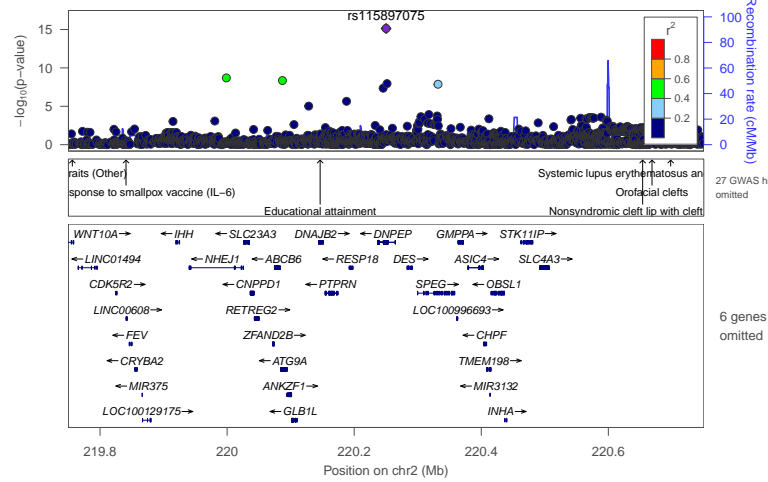

X - 24494

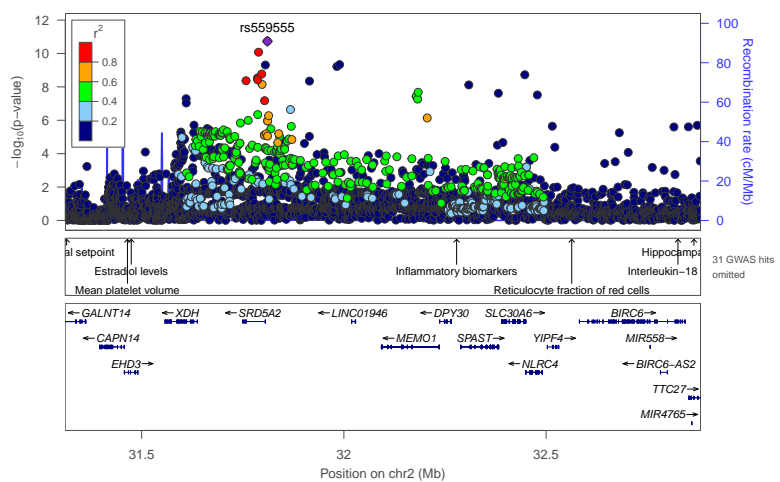

X - 24494

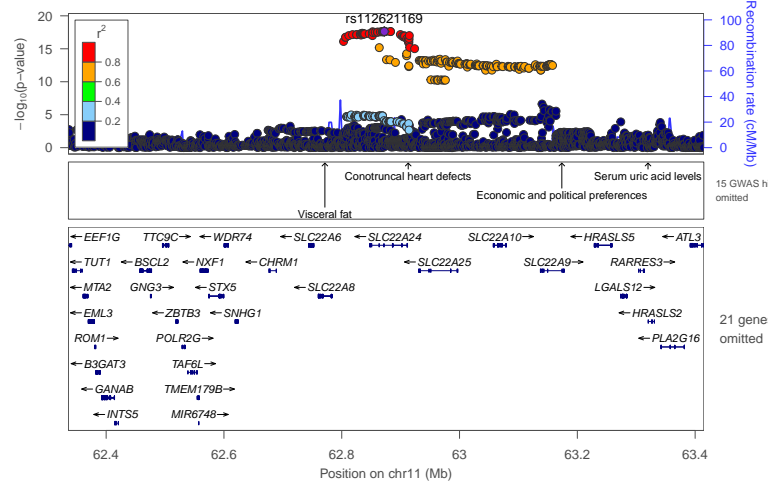



### X - 24518

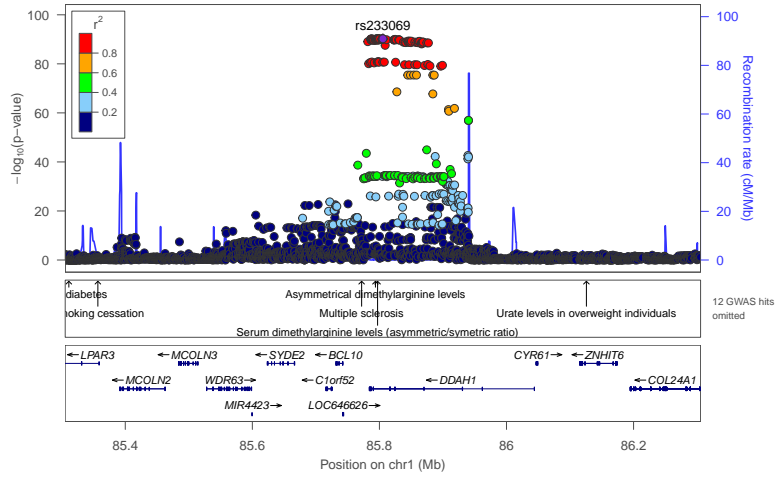

### X - 24518

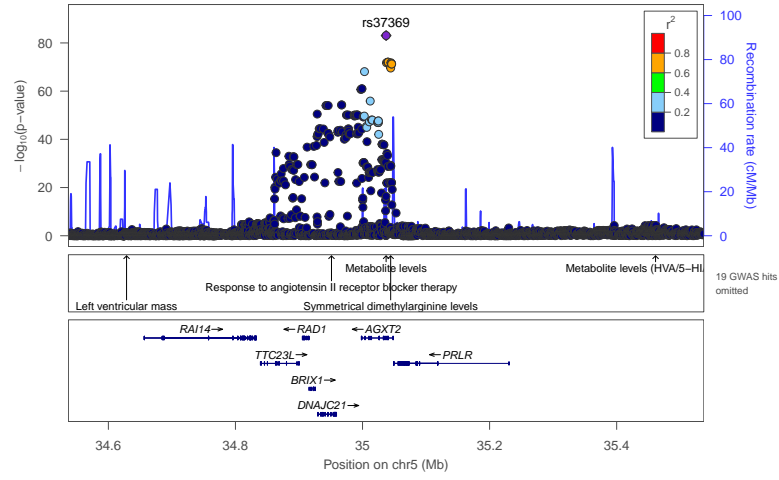

### X - 24544

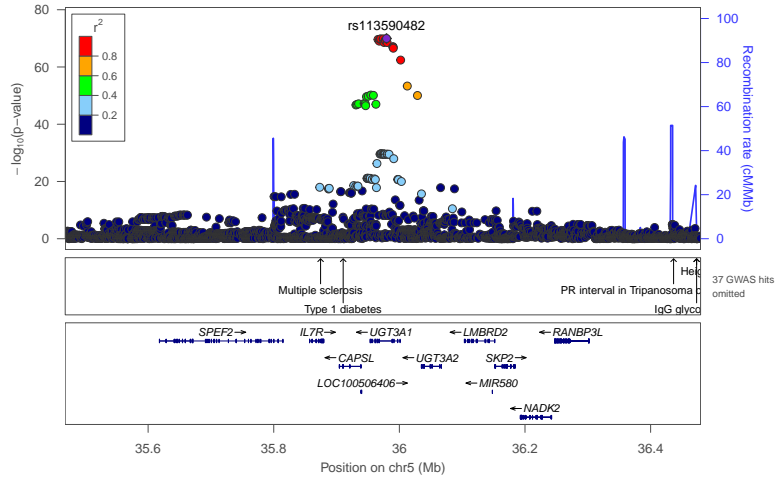

### X - 24546

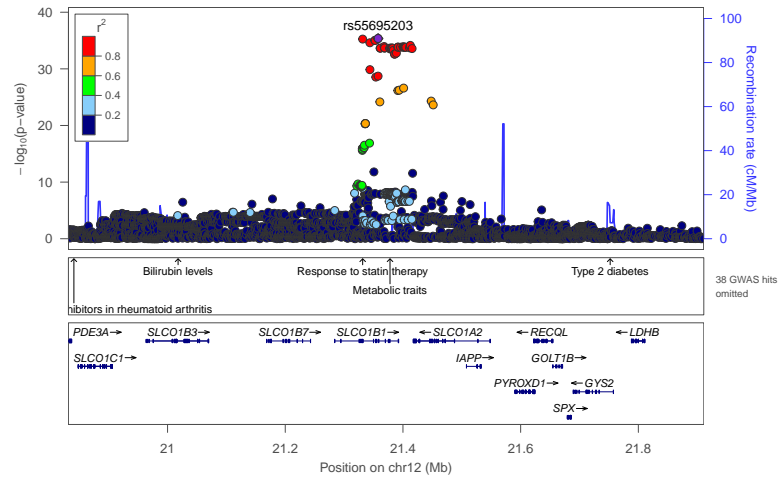

### X - 24556

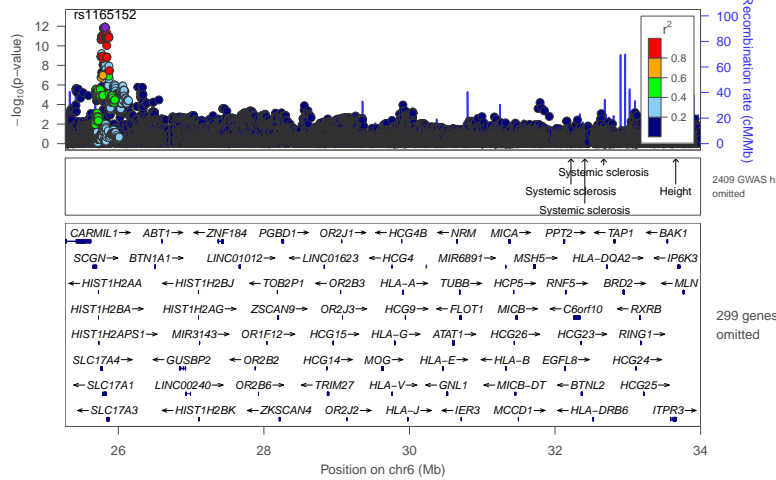

### X - 24588

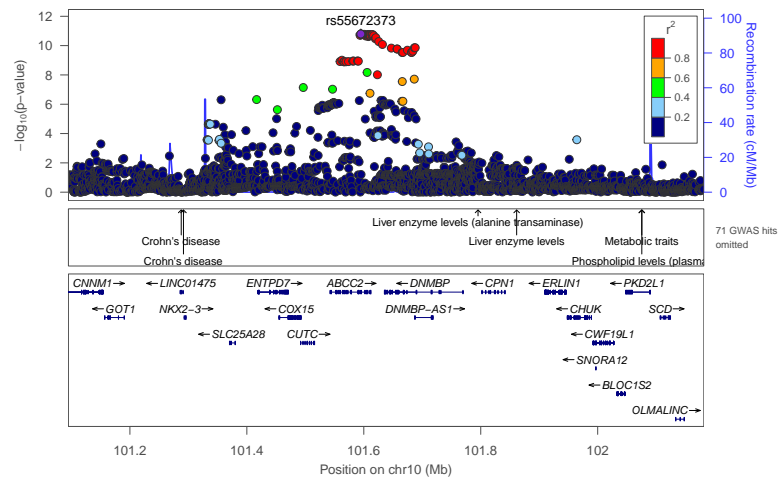

X - 24588

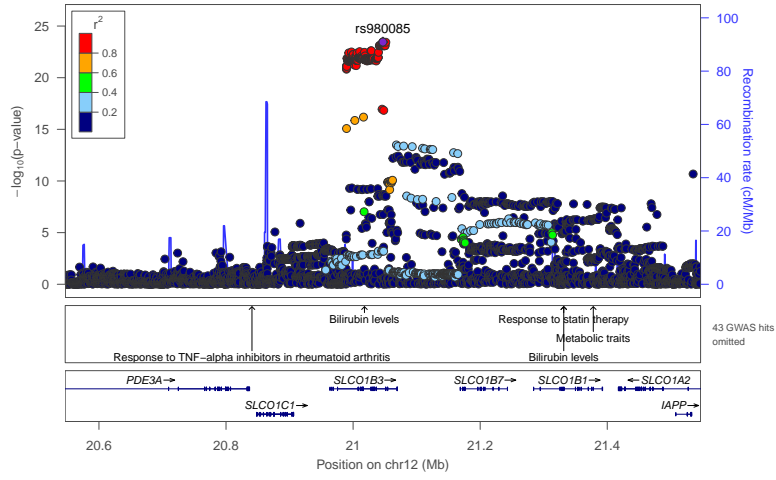

X - 24588

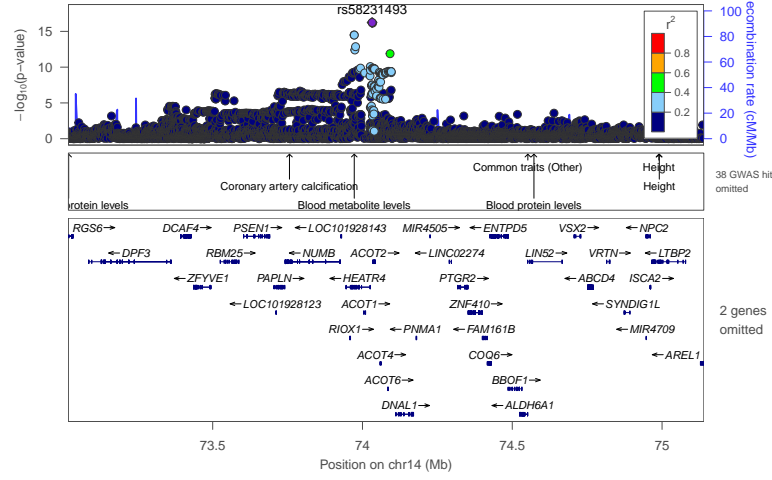

phenylacetylglutamate

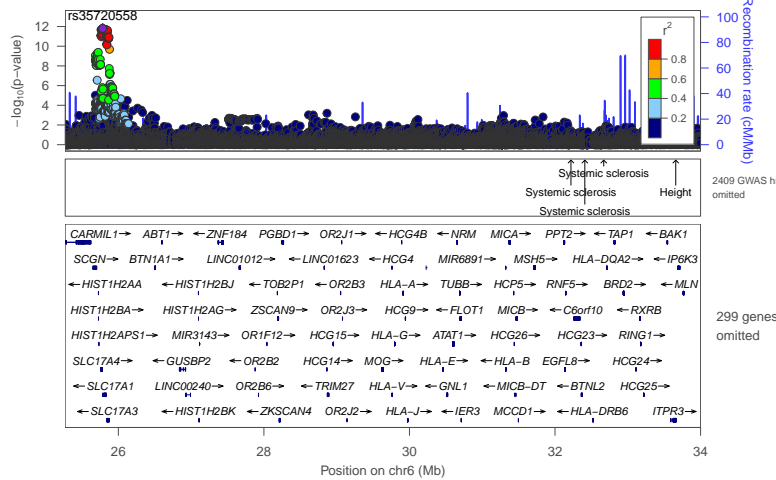

4-hydroxyphenylacetyl carnitine

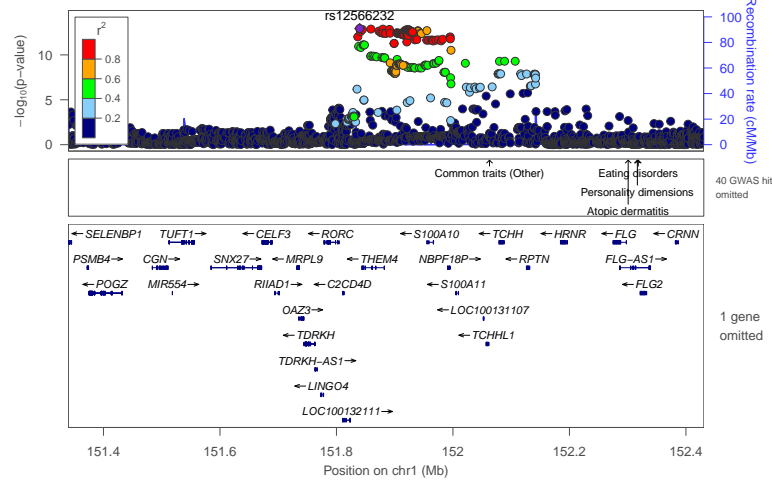

glycochenodeoxycholate 3-sulfate

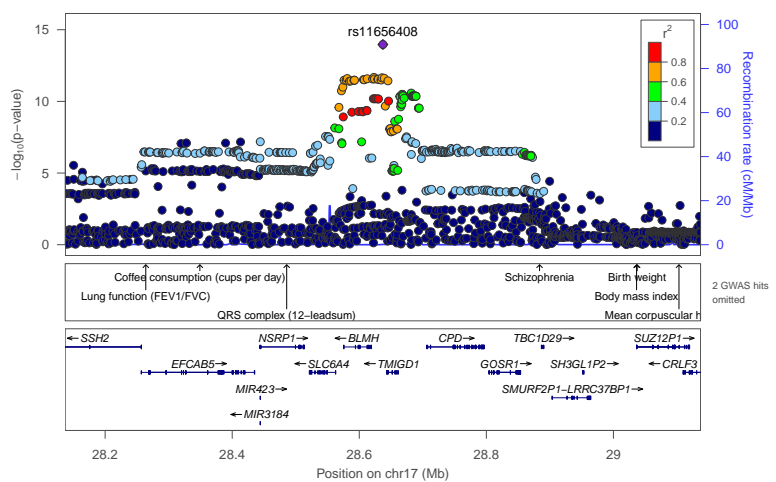

glycochenodeoxycholate 3-sulfate

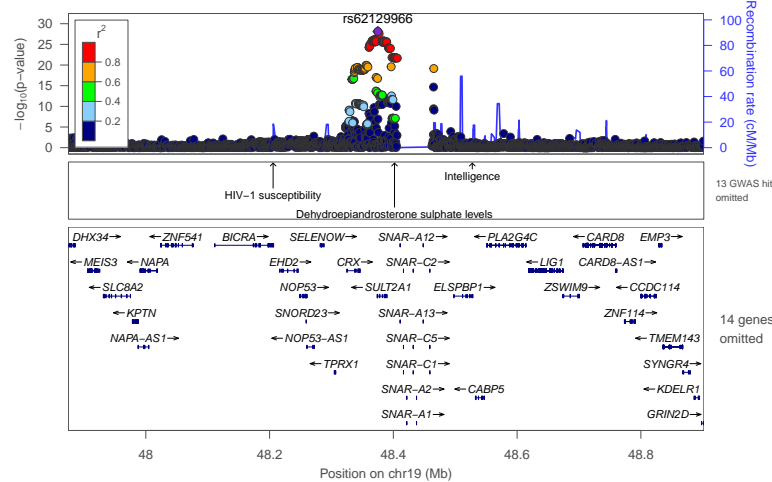

glycodeoxycholate 3-sulfate

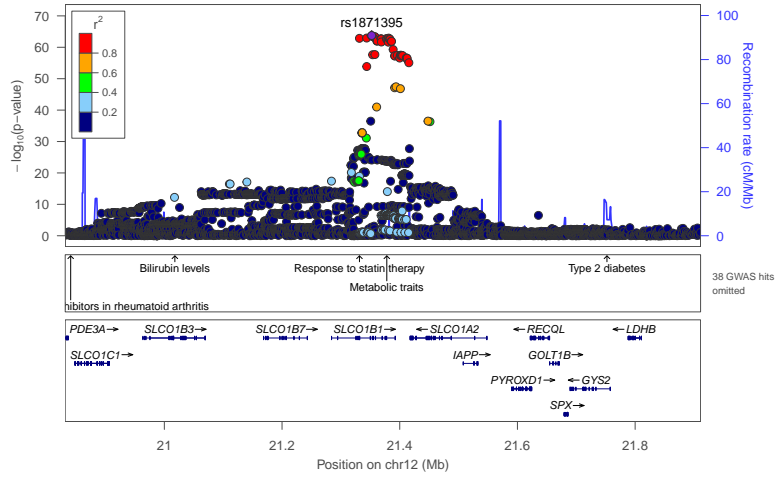

glycodeoxycholate 3-sulfate

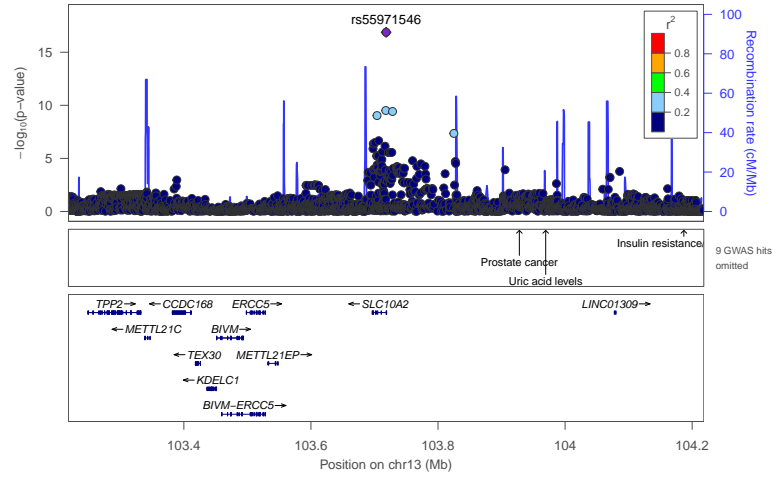

glycodeoxycholate 3-sulfate

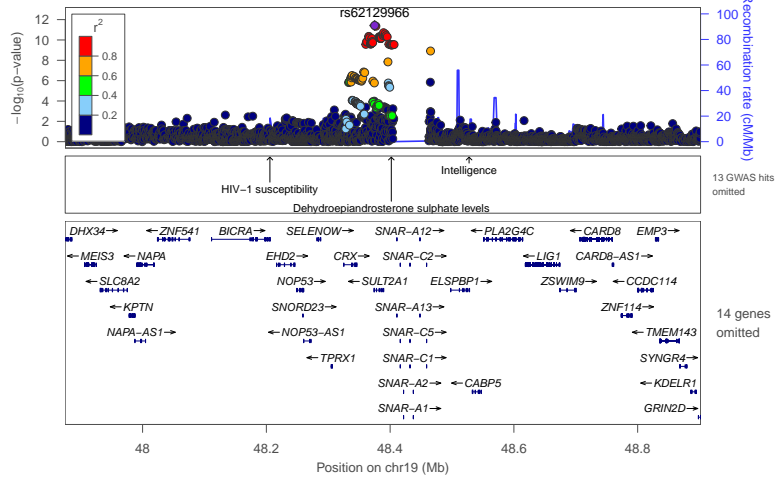

glycochenodeoxycholate glucuronide (1)

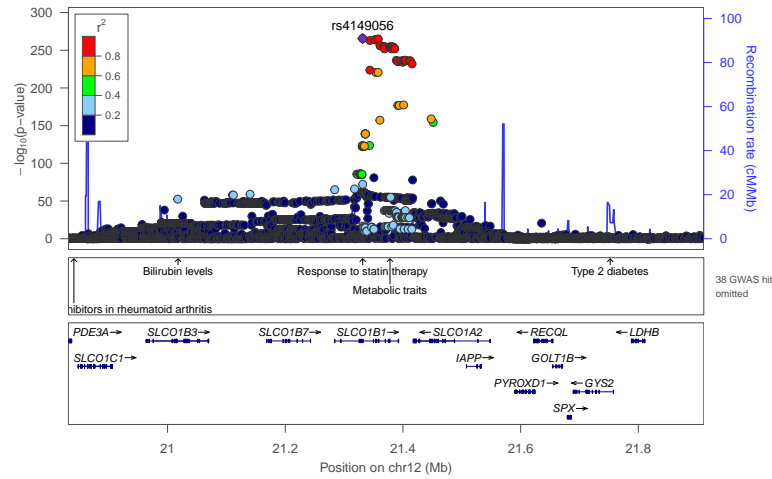

adipoylcarnitine (C6-DC)

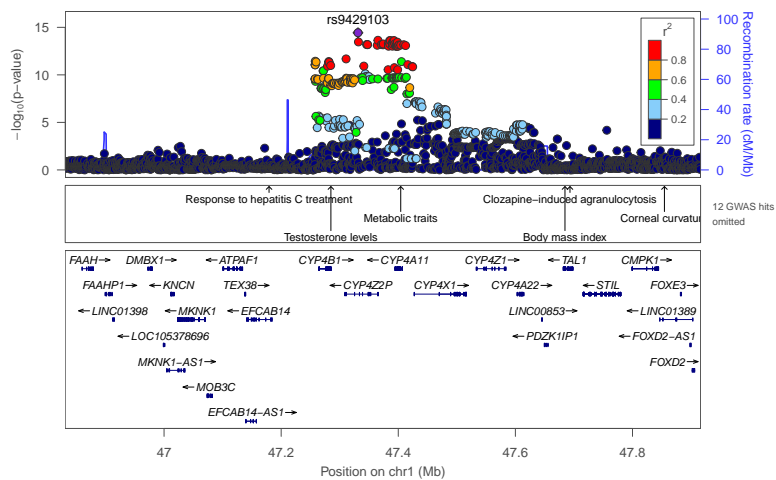

adipoylcarnitine (C6-DC)

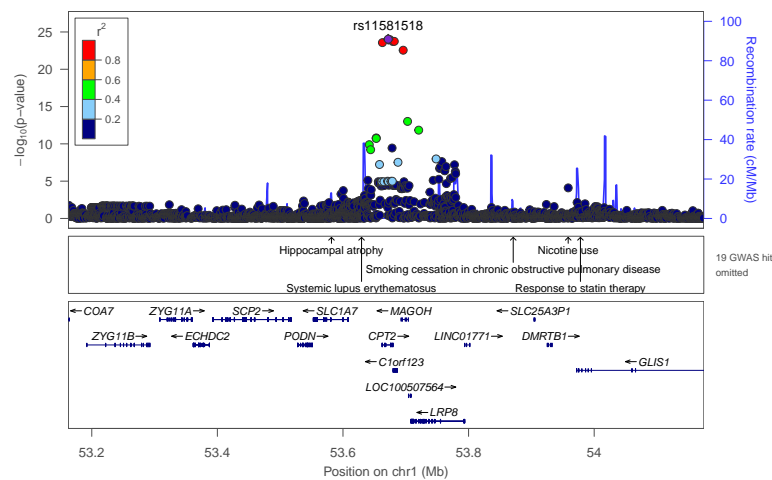

### adipoylcarnitine (C6-DC)

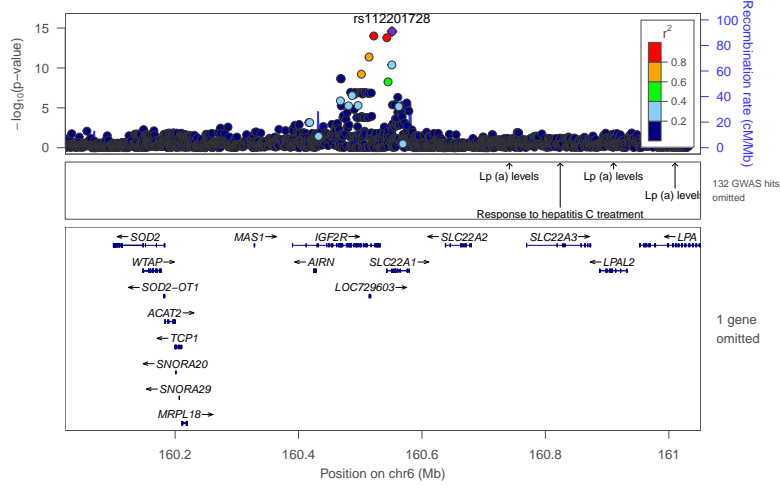

### suberoylcarnitine (C8-DC)

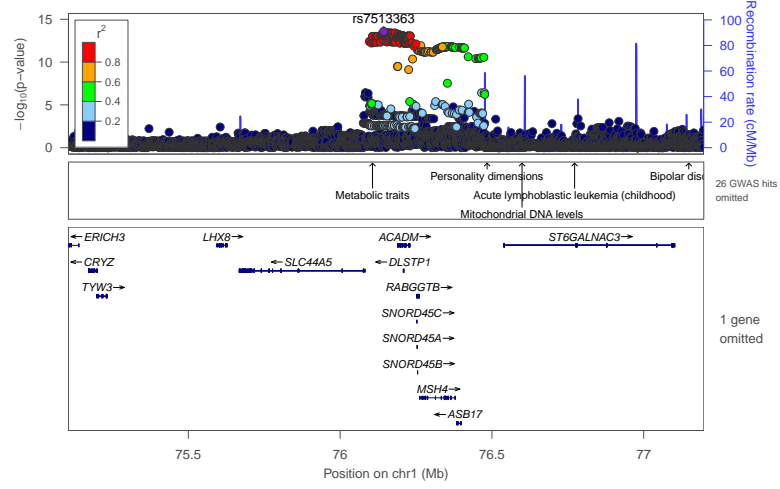

### suberoylcarnitine (C8-DC)

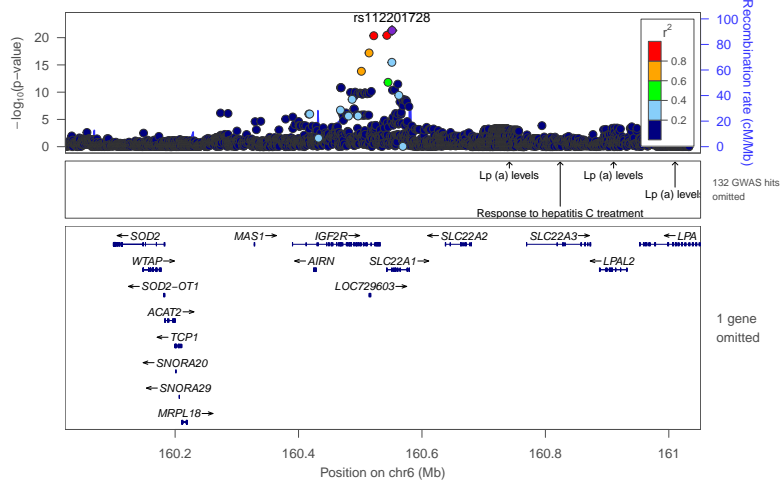

### suberoylcarnitine (C8-DC)

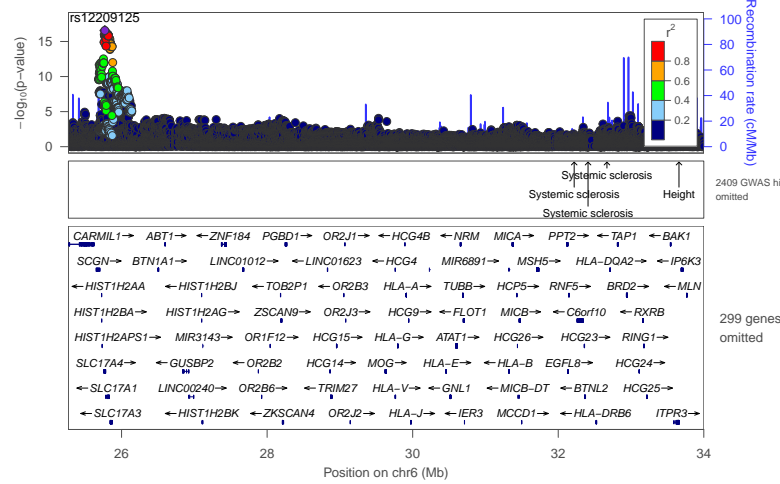

### lactosyl-N-palmitoyl-sphingosine (d18:1/16:0)

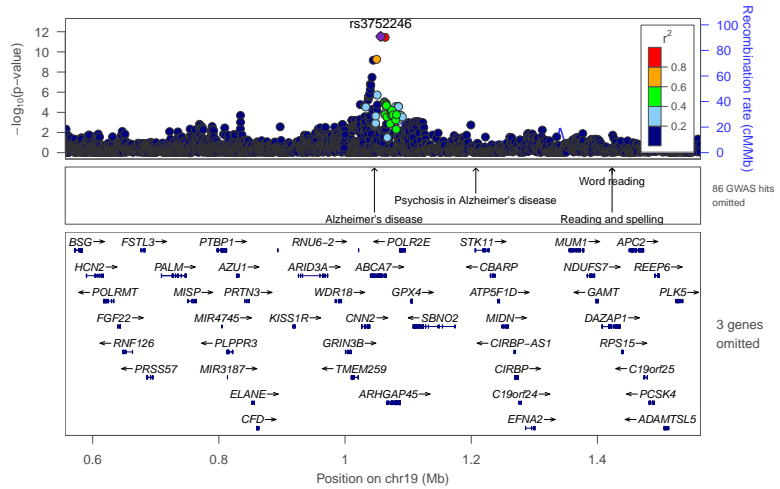

### glycosyl-N-palmitoyl-sphingosine (d18:1/16:0)

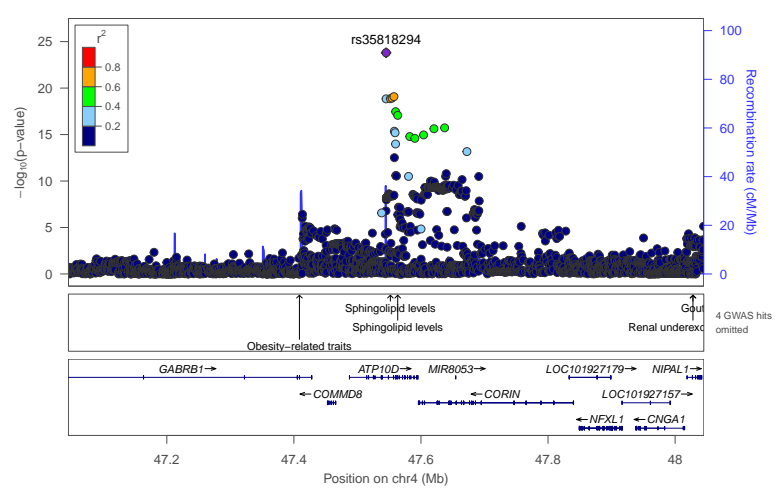

### methylsuccinoylcarnitine

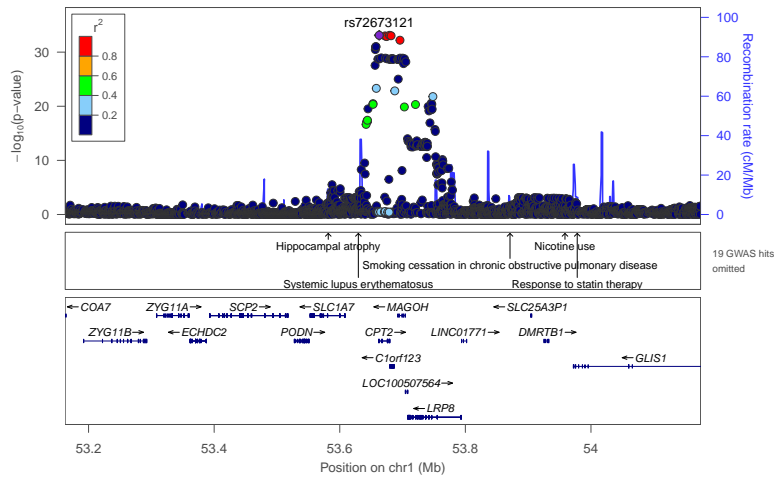

### methylsuccinoylcarnitine

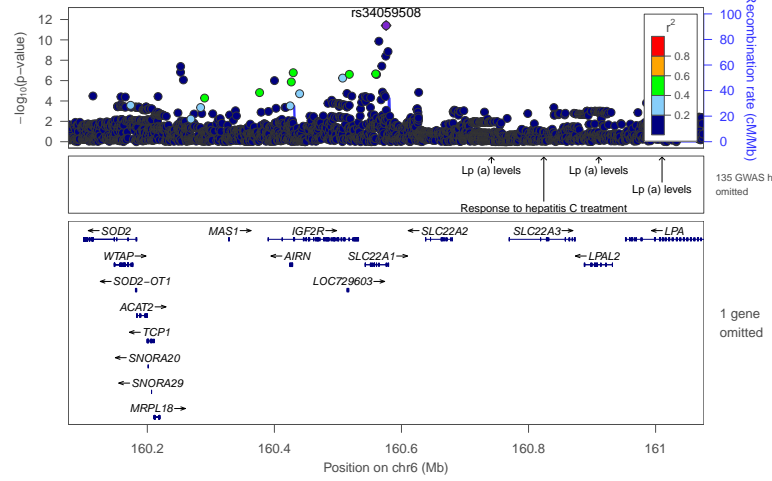

### methylsuccinoylcarnitine

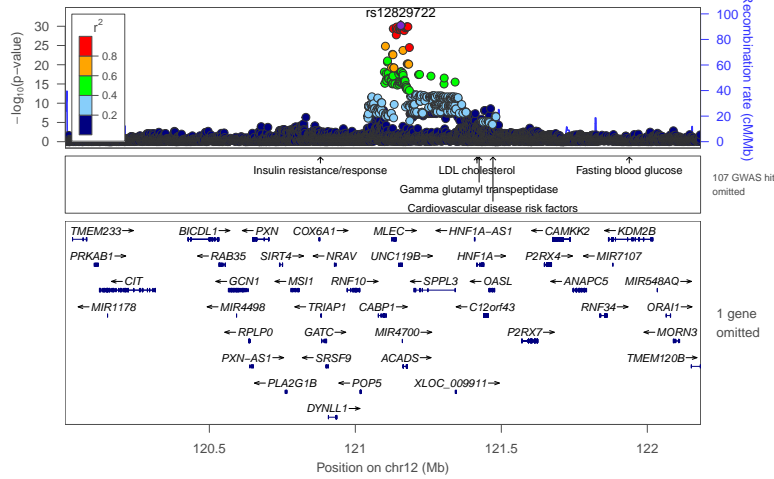

### methylsuccinoylcarnitine

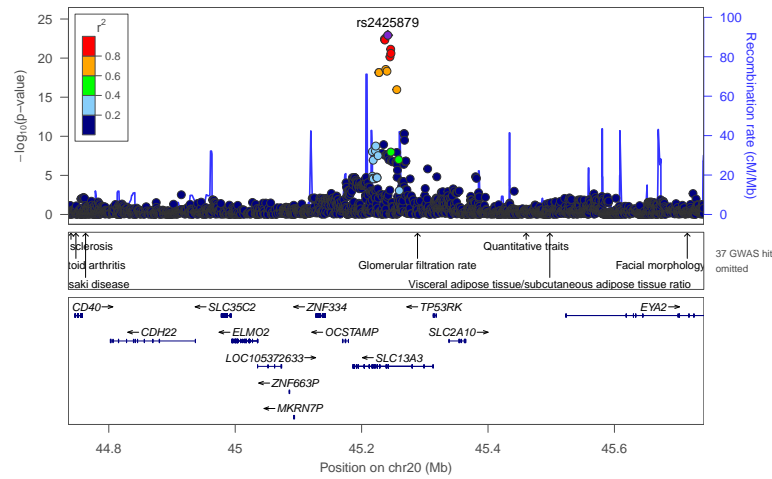

### X - 24736

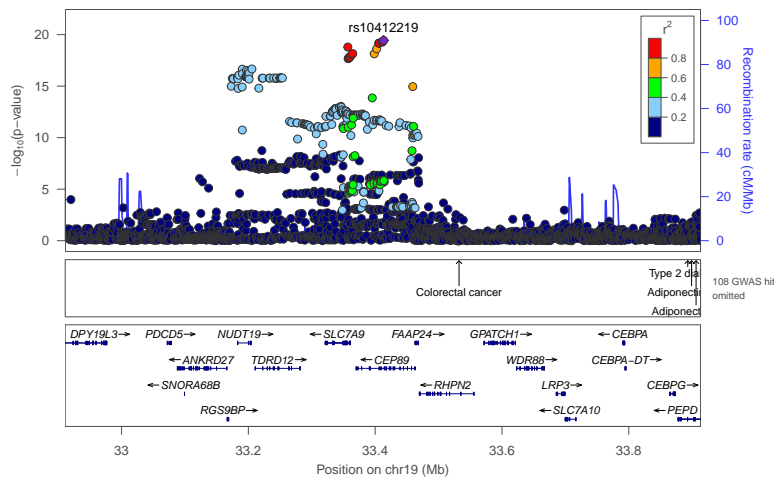

### 1-linoleoyl-2-linolenoyl-GPC (18:2/18:3)\*

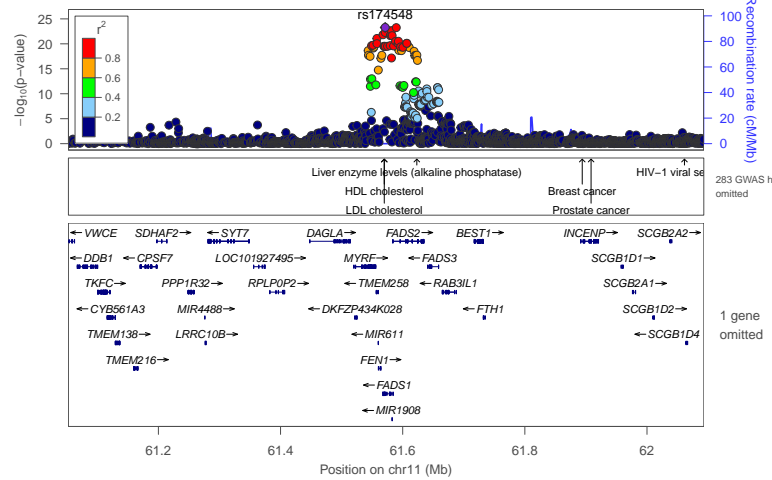

### 1-palmitoleyl-2-linolenoyl-GPC (16:1/18:3)\*

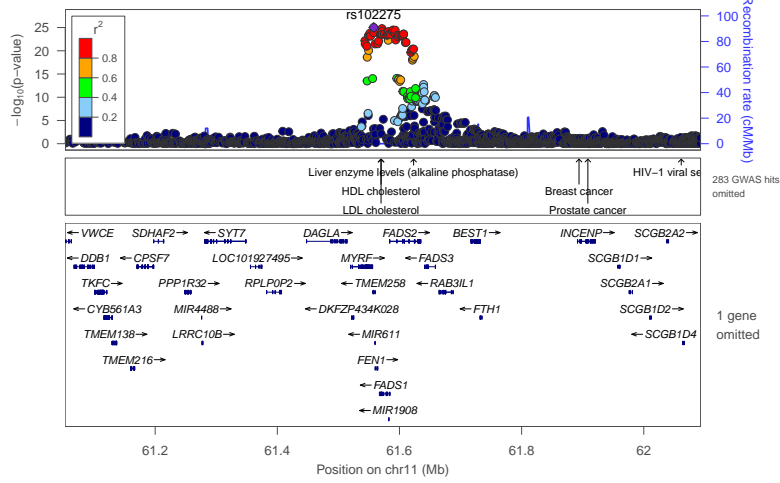

### 1-myristoyl-2-arachidonoyl-GPC (14:0/20:4)\*

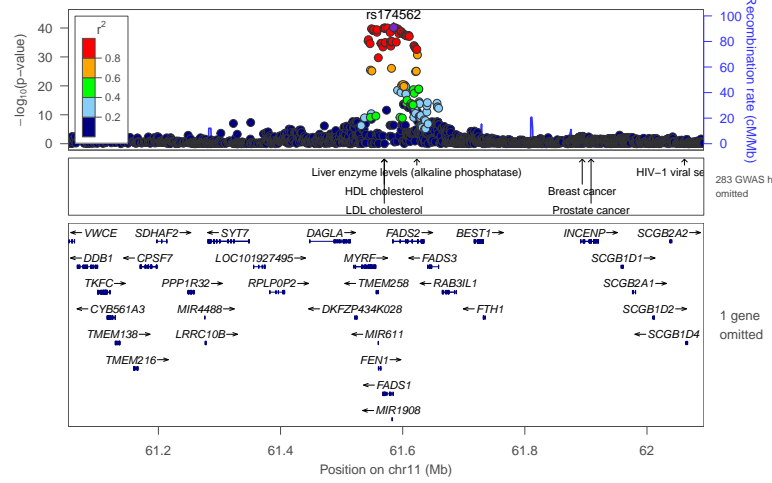

### pimeloylcarnitine/3-methyladipoylcarnitine (C7-DC)

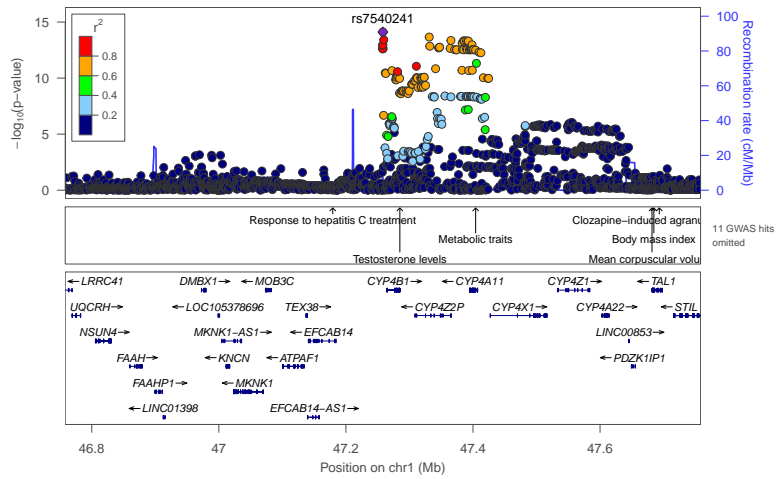

### pimeloylcarnitine/3-methyladipoylcarnitine (C7-DC)

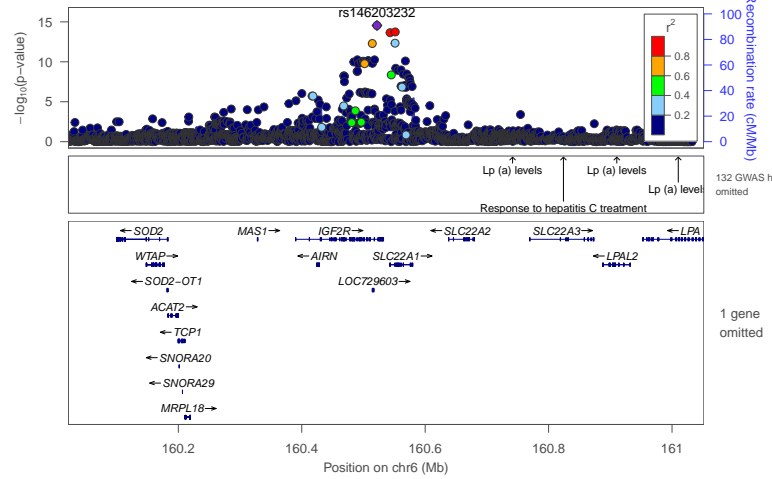

### 3-hydroxyhexanoate

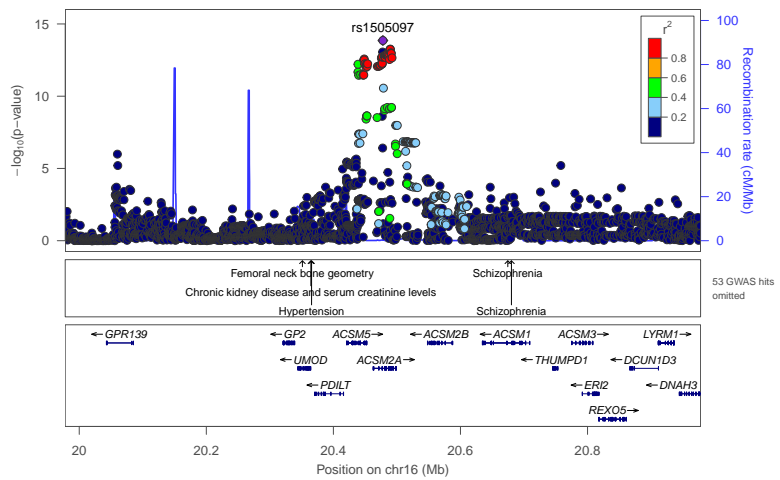

### arachidonoylcholine

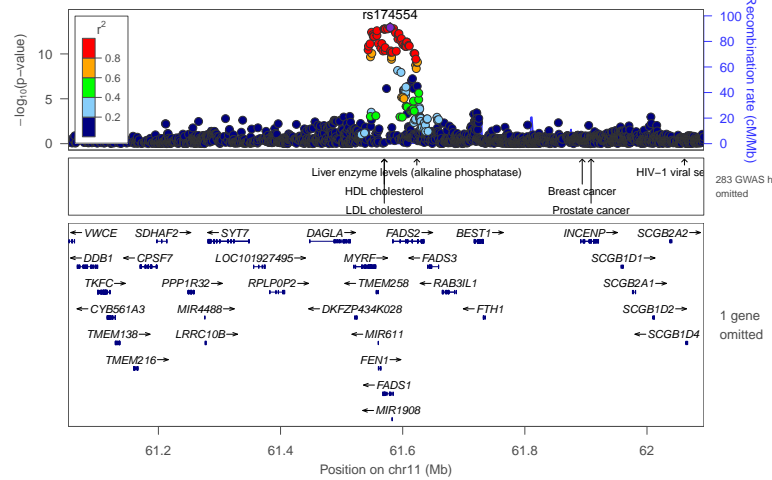



### glutamine

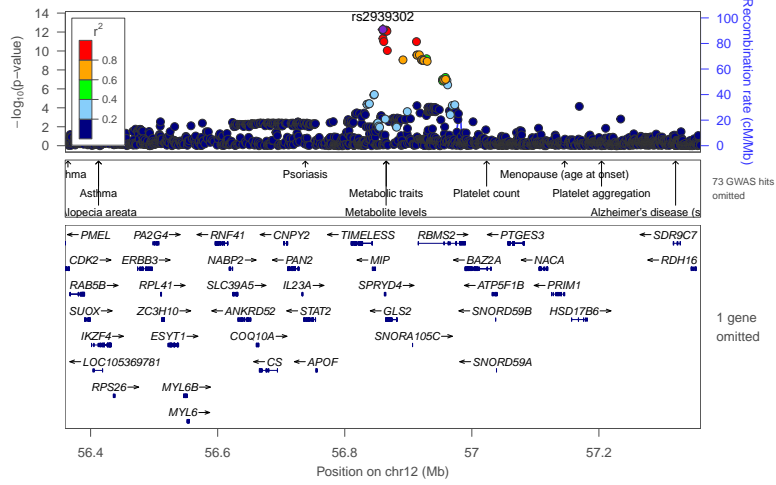

### furaneol sulfate

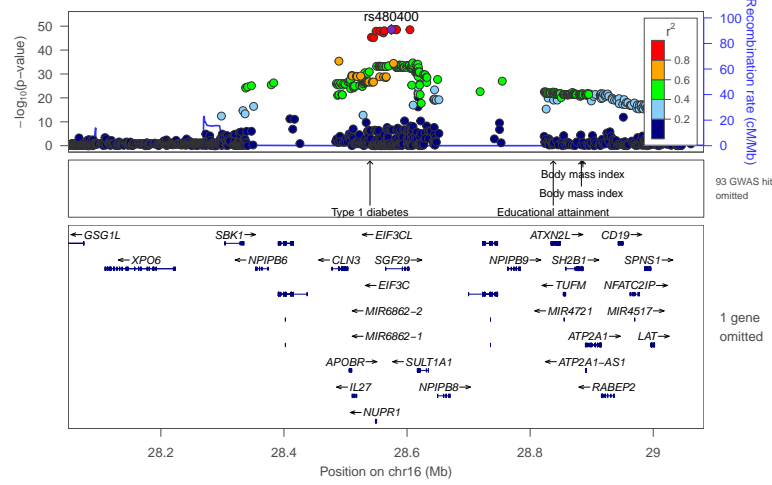

### 3beta-hydroxy-5-cholestenoate

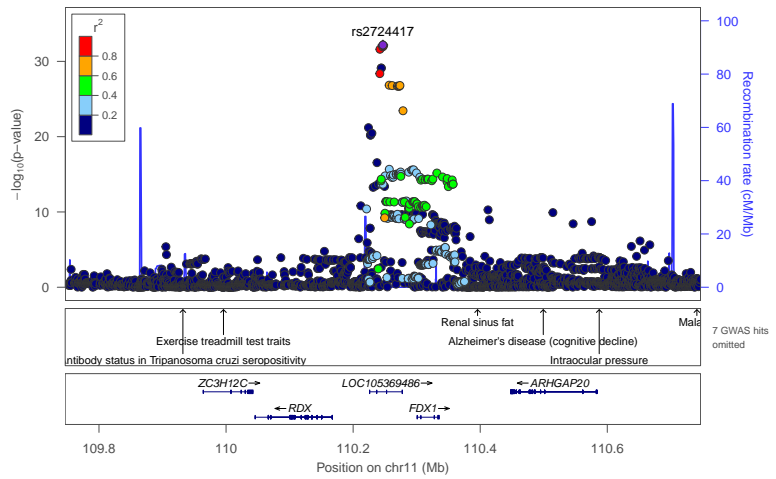

### X - 24801

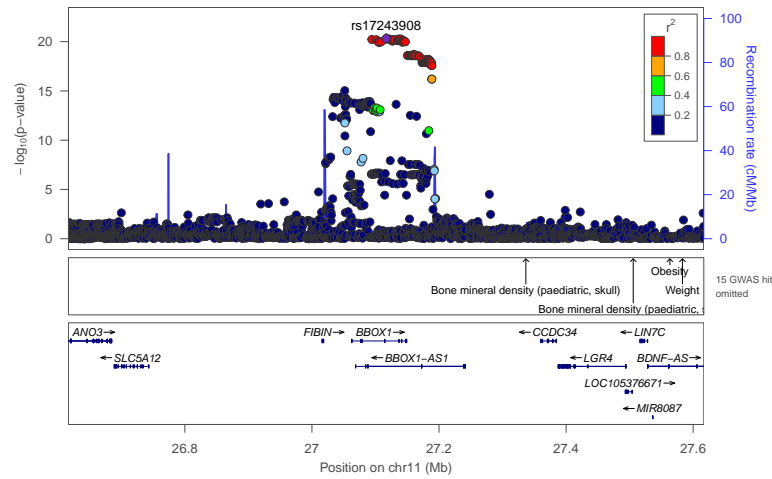

### 1-linoleoyl-GPG (18:2)\*

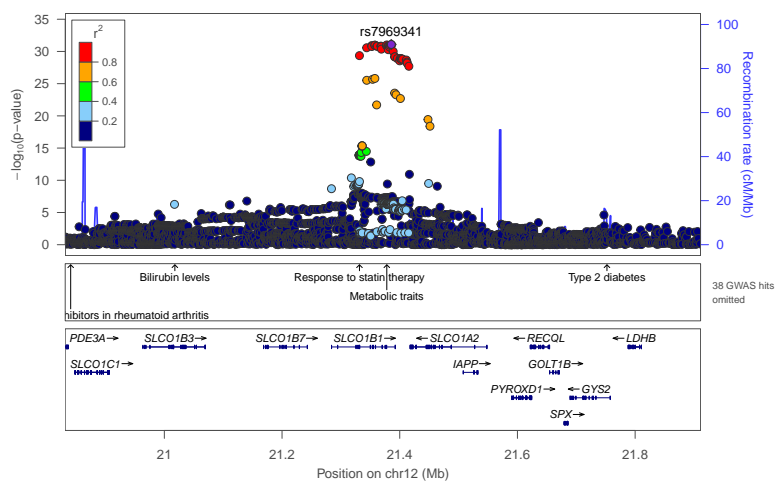

### hexanoylglutamine

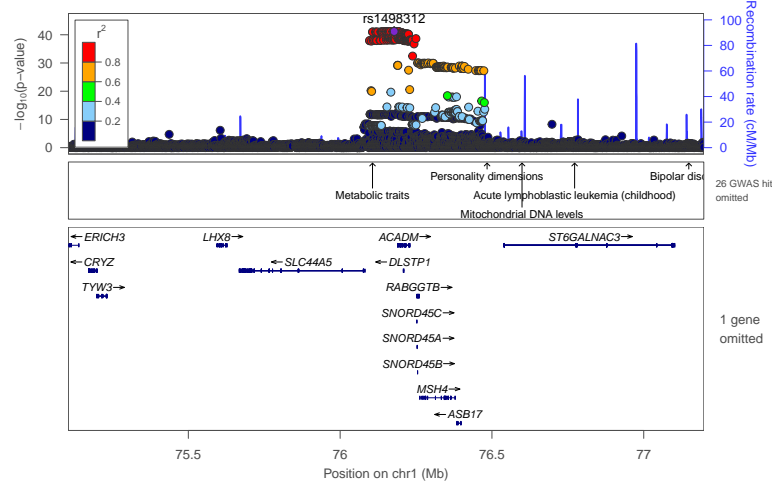

### hexanoylglutamine

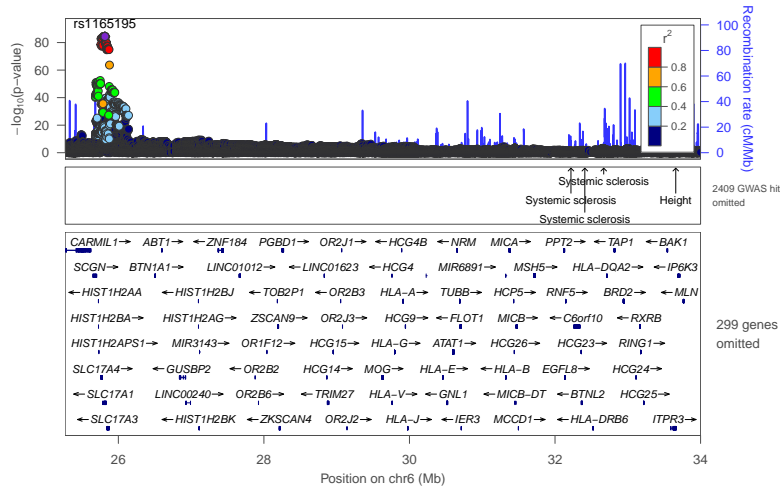

### beta-citrylglutamate

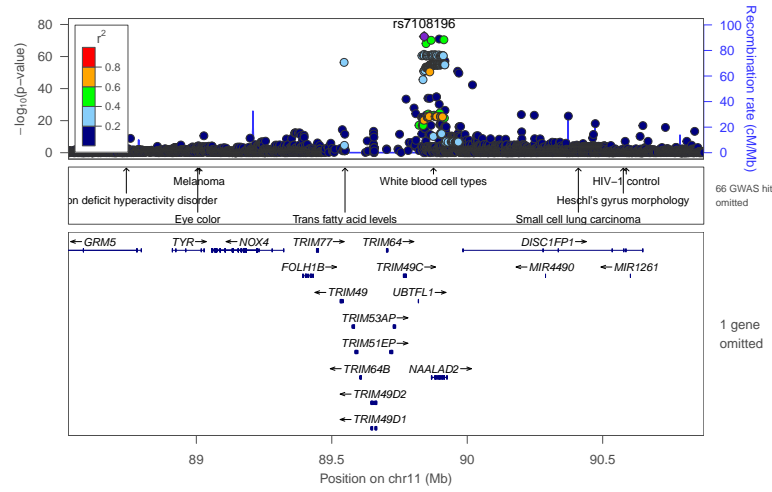

### oleoyl-oleoyl-glycerol (18:1/18:1) [1]\*

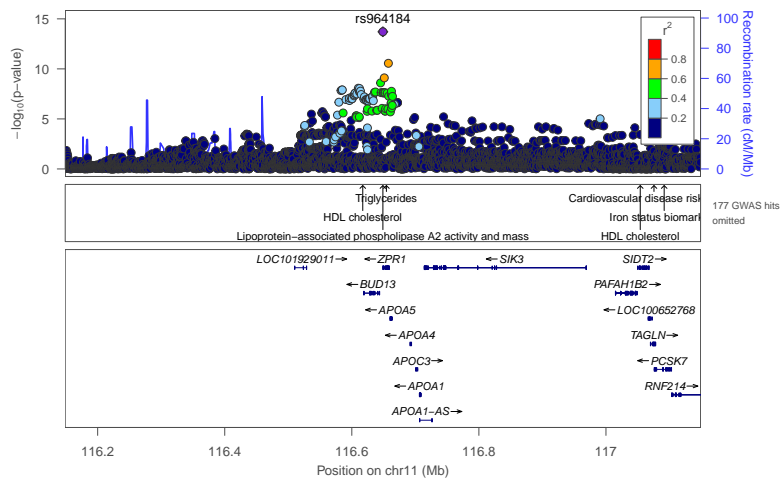

### oleoyl-oleoyl-glycerol (18:1/18:1) [2]\*

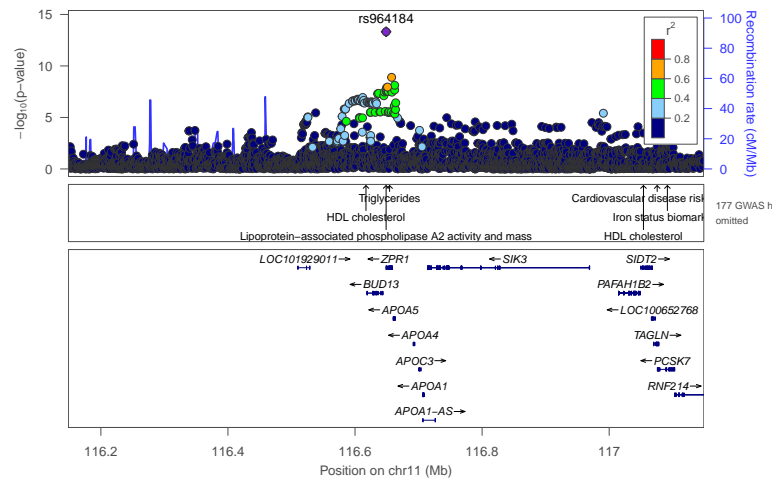

### linoleoyl-arachidonoyl-glycerol (18:2/20:4) [1]\*

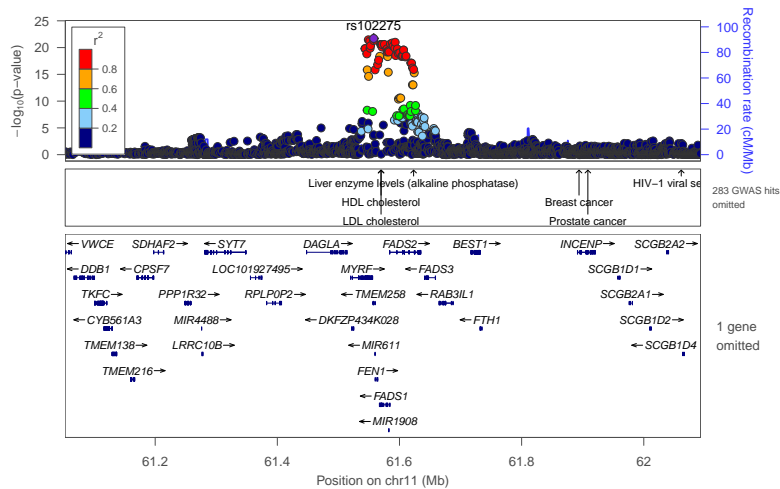

### linoleoyl-arachidonoyl-glycerol (18:2/20:4) [1]\*

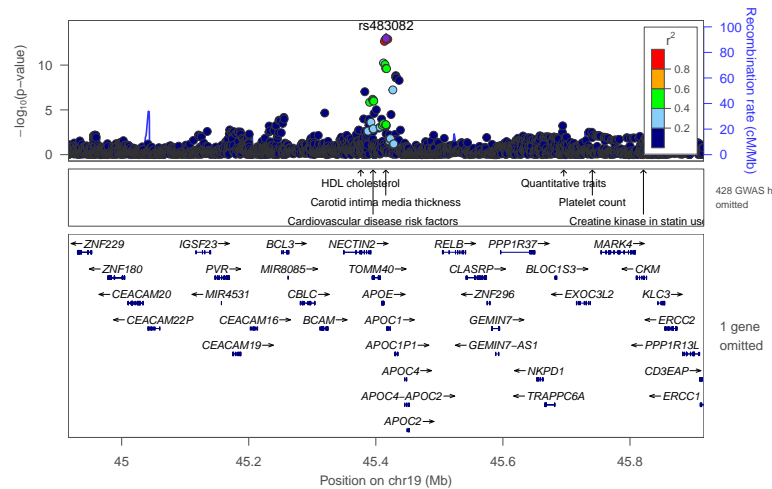

linoleoyl–arachidonoyl–glycerol (18:2/20:4) [2]\*

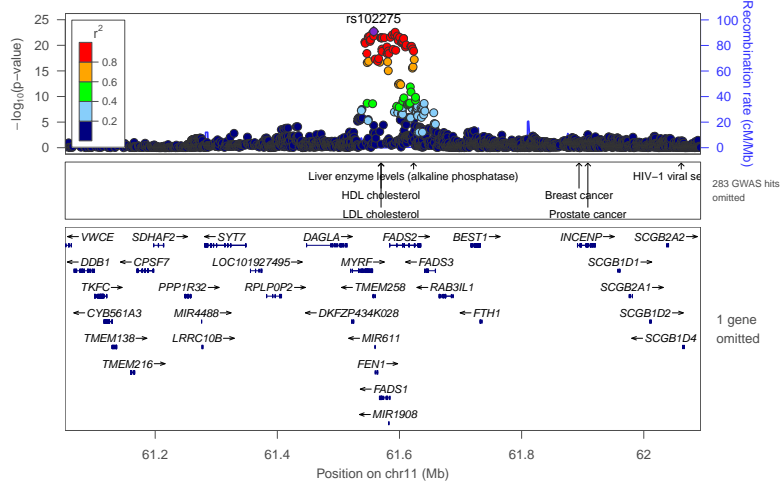

linoleoyl–arachidonoyl–glycerol (18:2/20:4) [2]\*

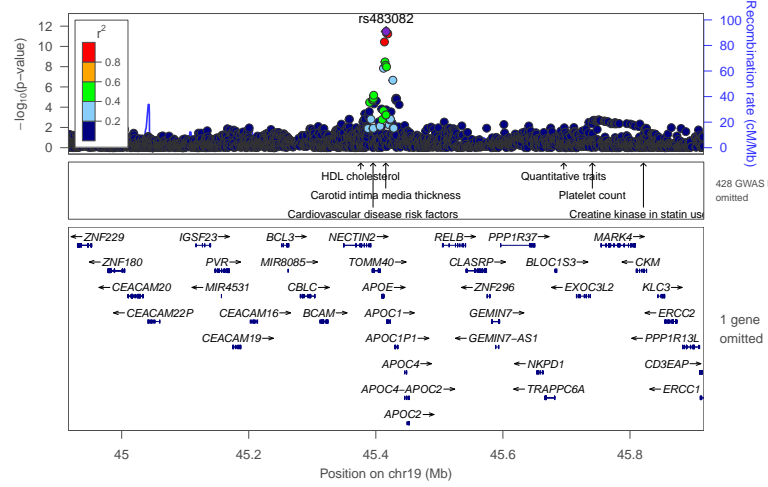

oleoyl–arachidonoyl–glycerol (18:1/20:4) [1]\*

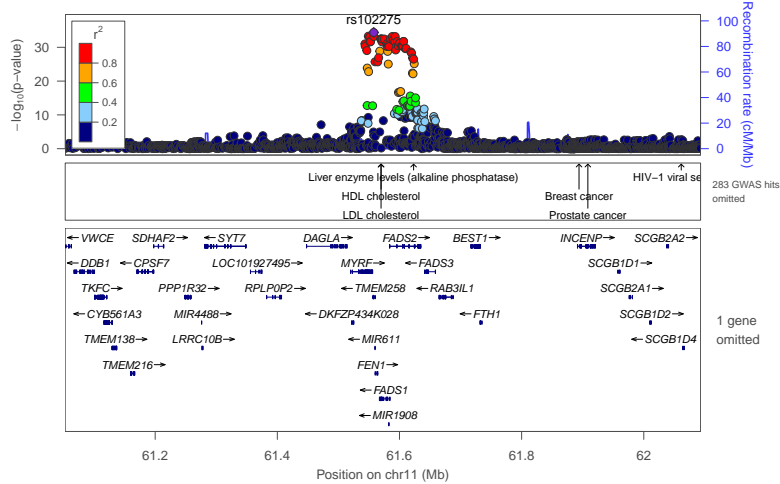

oleoyl–arachidonoyl–glycerol (18:1/20:4) [1]\*

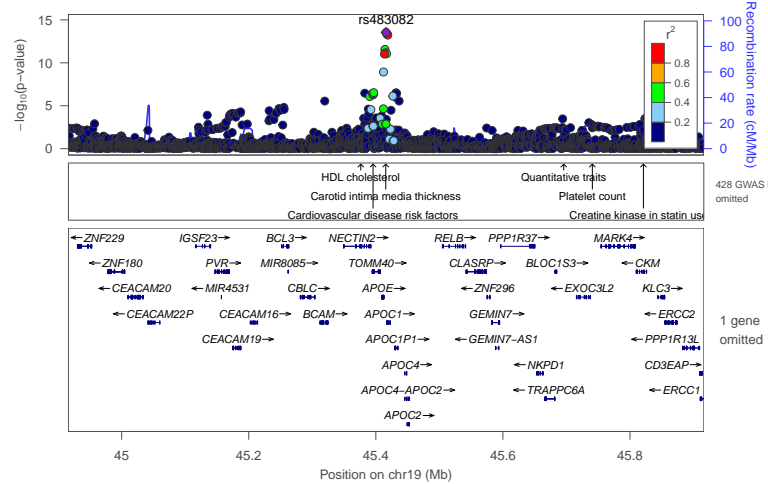

oleoyl–arachidonoyl–glycerol (18:1/20:4) [2]\*

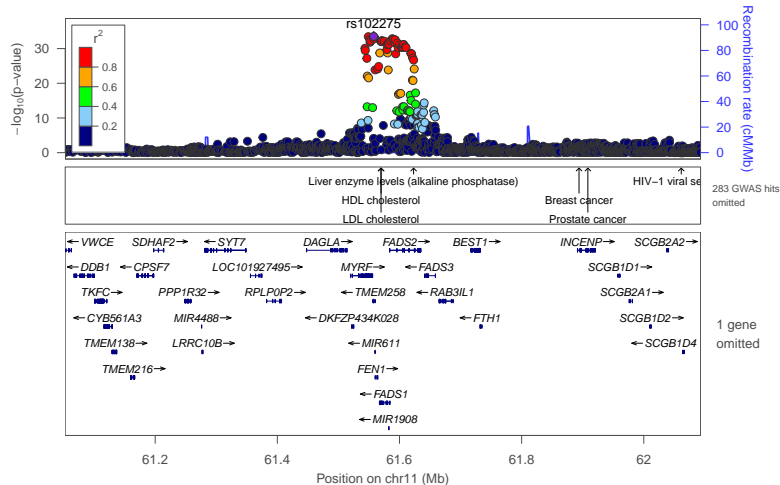

oleoyl–arachidonoyl–glycerol (18:1/20:4) [2]\*

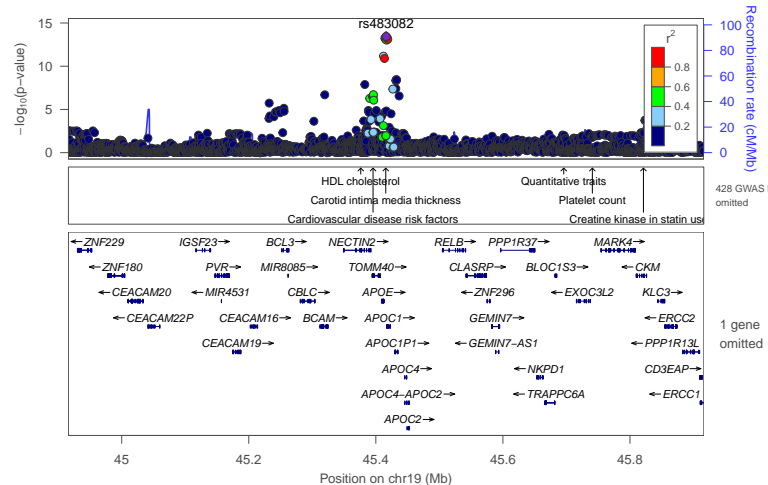

linoleoyl–linoleoyl–glycerol (18:2/18:2) [1]\*

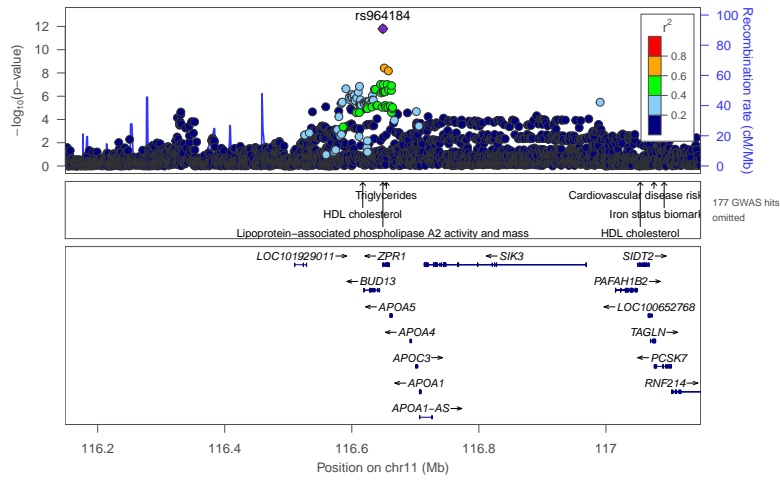

N–stearoyl–sphingosine (d18:1/18:0)\*

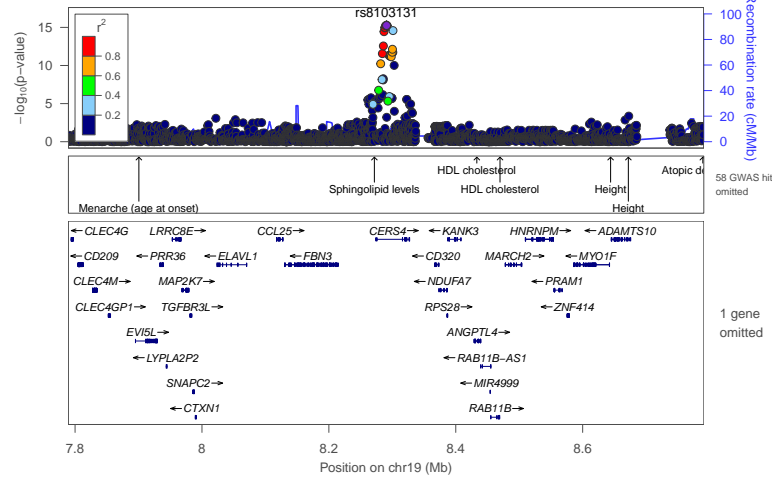

N–stearoyl–sphingosine (d18:1/18:0)\*

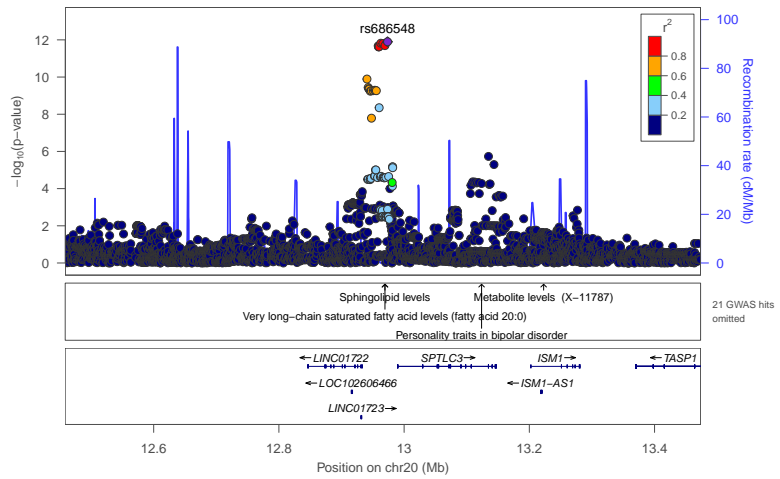

1–oleoyl–2–arachidonoyl–GPE (18:1/20:4)\*

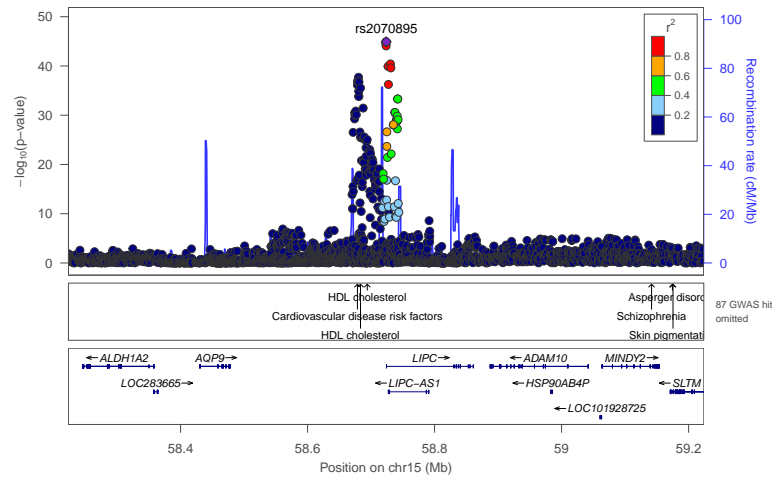

behenoil dihydrosphingomyelin (d18:0/22:0)\*

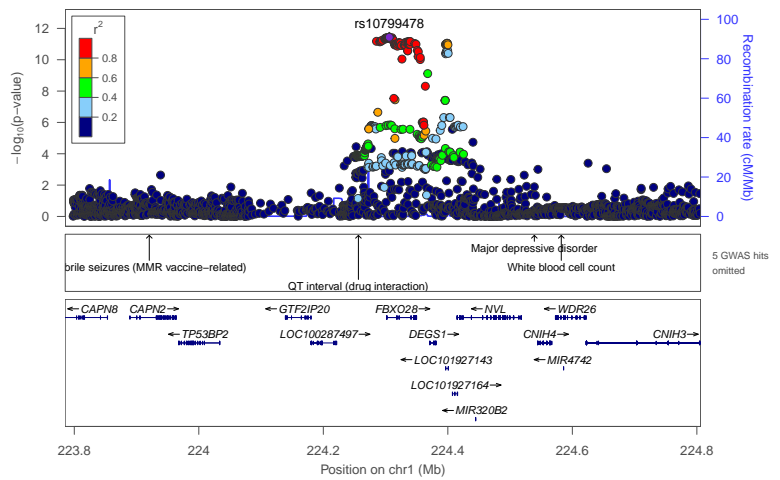

myristoyl dihydrosphingomyelin (d18:0/14:0)\*

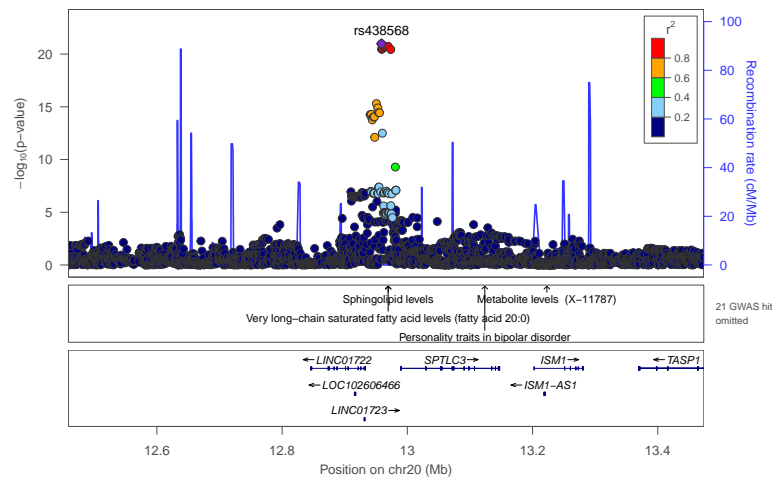

**lactosyl-N-nervonoyl-sphingosine (d18:1/24:1)\***

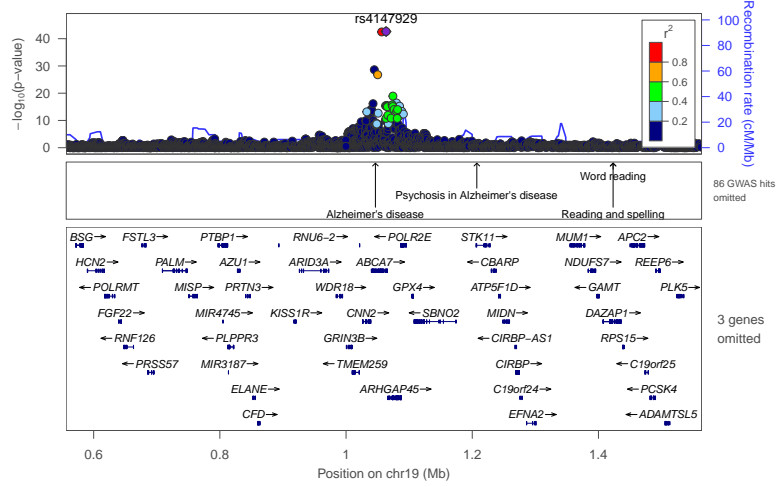

**N-stearoyl-sphingadienine (d18:2/18:0)\***

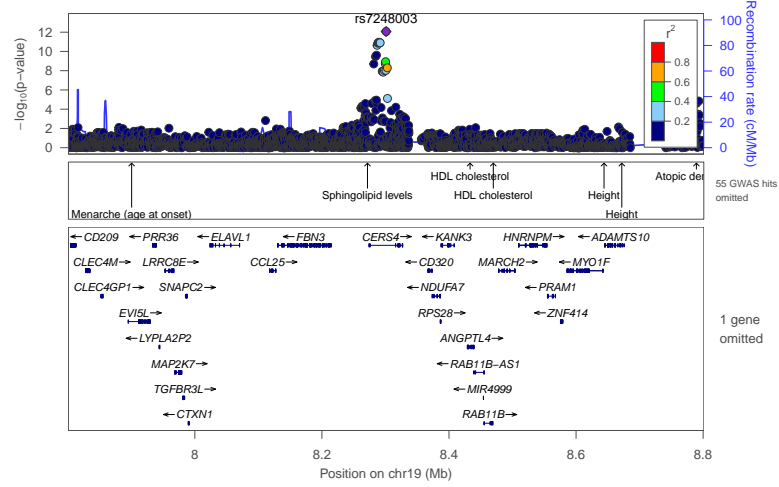

**glycosyl-N-behenoyl-sphingadienine (d18:2/22:0)\***

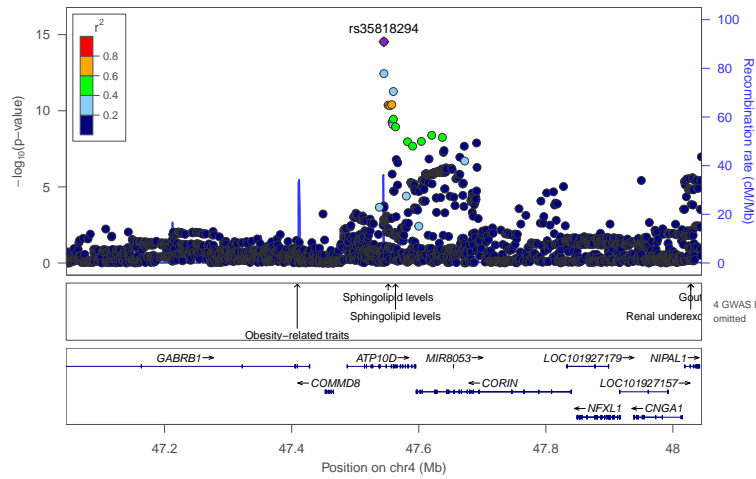

**lactosyl-N-behenoyl-sphingosine (d18:1/22:0)\***

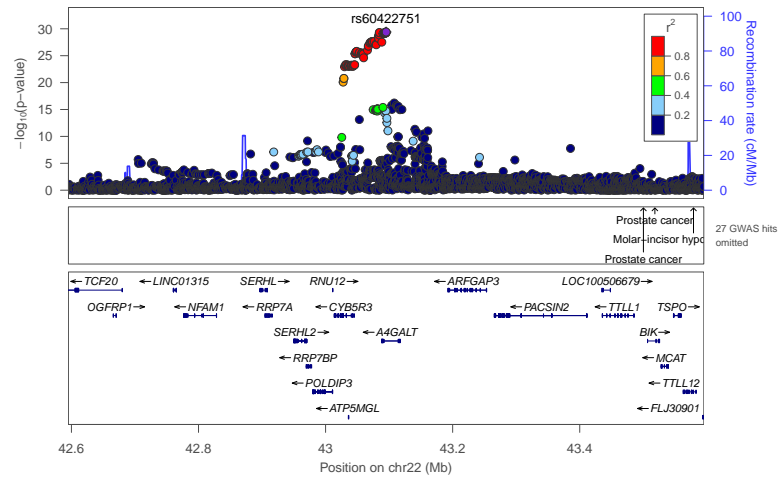

**N-palmitoyl-heptadecasphingosine (d17:1/16:0)\***

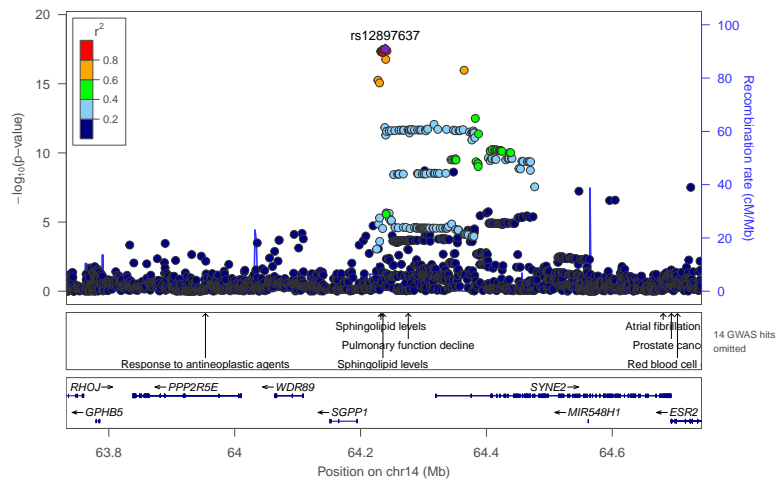

**ceramide (d18:1/14:0, d16:1/16:0)\***

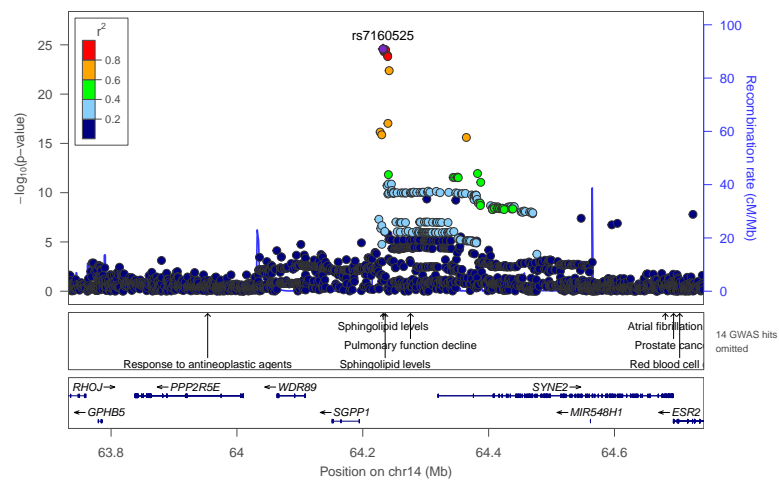

ceramide (d16:1/24:1, d18:1/22:1)\*

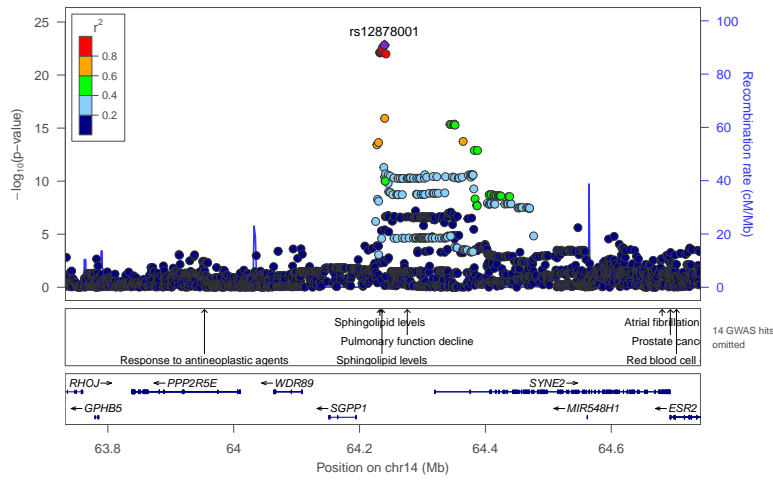

ceramide (d16:1/24:1, d18:1/22:1)\*

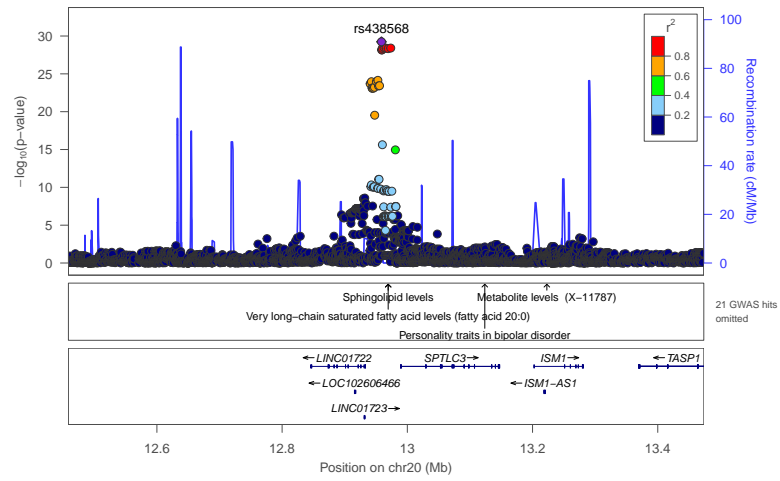

N-nervonoyl-sphingadiene (d18:2/24:1)\*

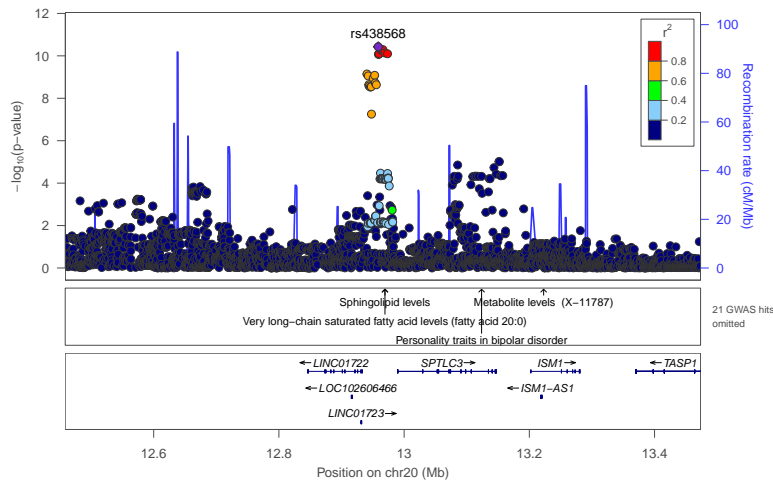

glycosyl-N-(2-hydroxynervonoyl)-sphingosine (d18:1/24:1(2OH))\*

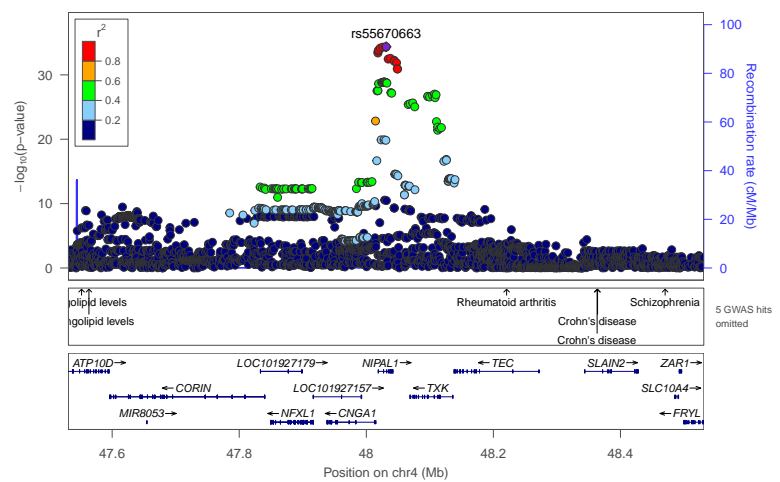

glycosyl-N-(2-hydroxynervonoyl)-sphingosine (d18:1/24:1(2OH))\*

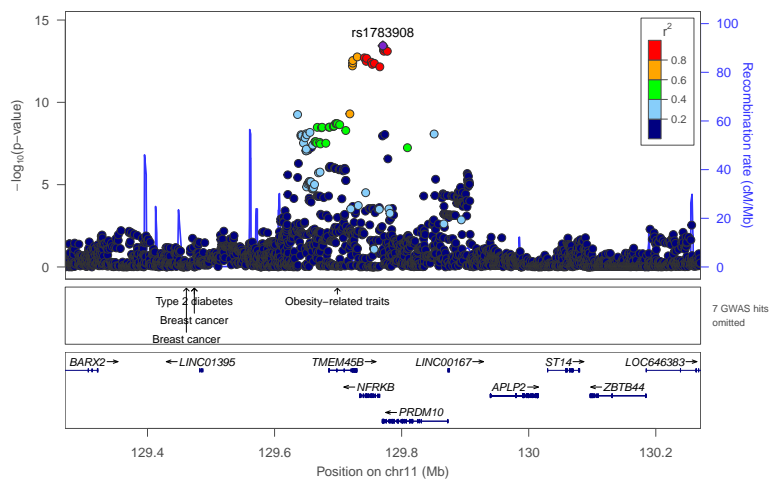

stearoyl-arachidonoyl-glycerol (18:0/20:4) [1]\*

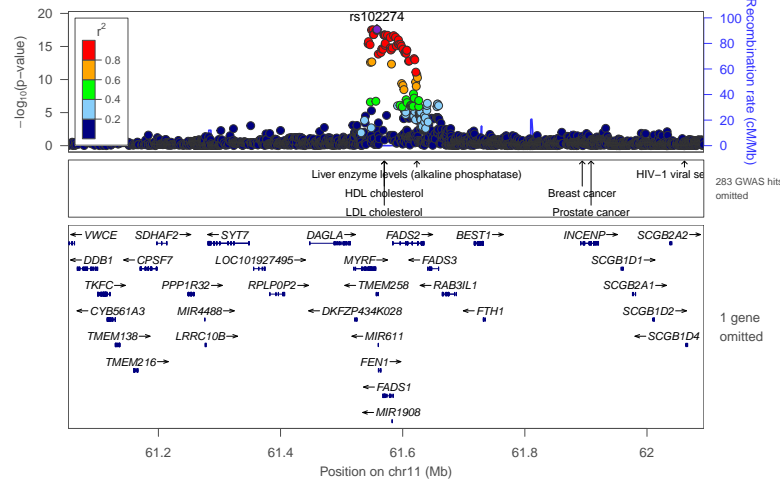



glycosyl ceramide (d18:2/24:1, d18:1/24:2)\*

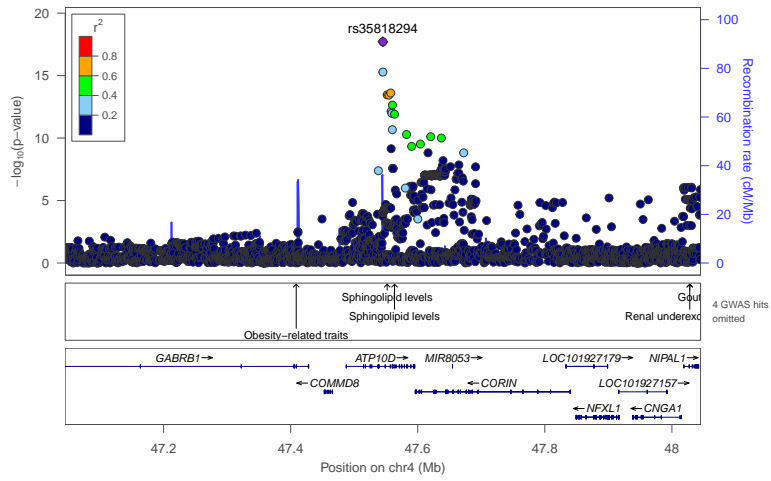

argininate\*

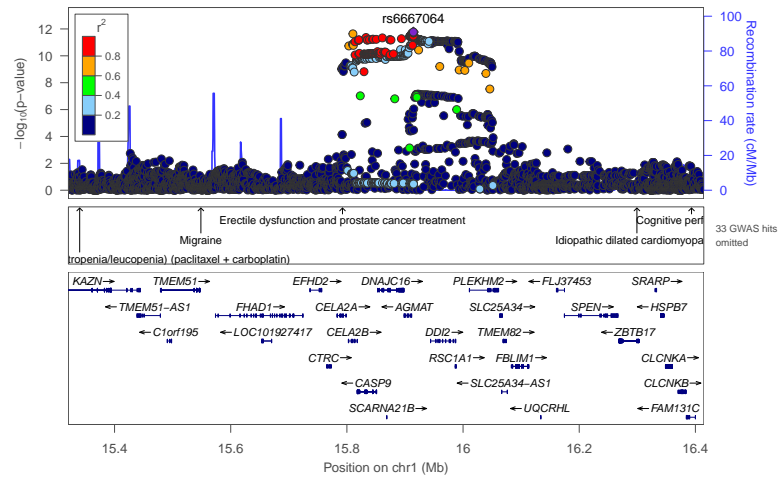

argininate\*

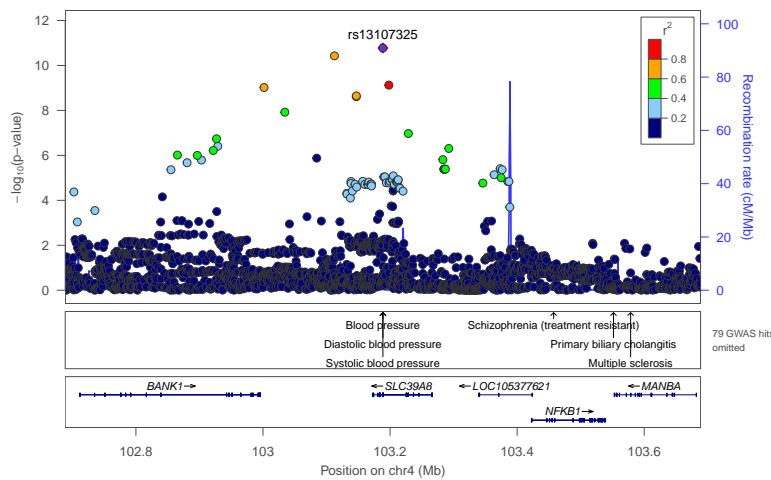

argininate\*

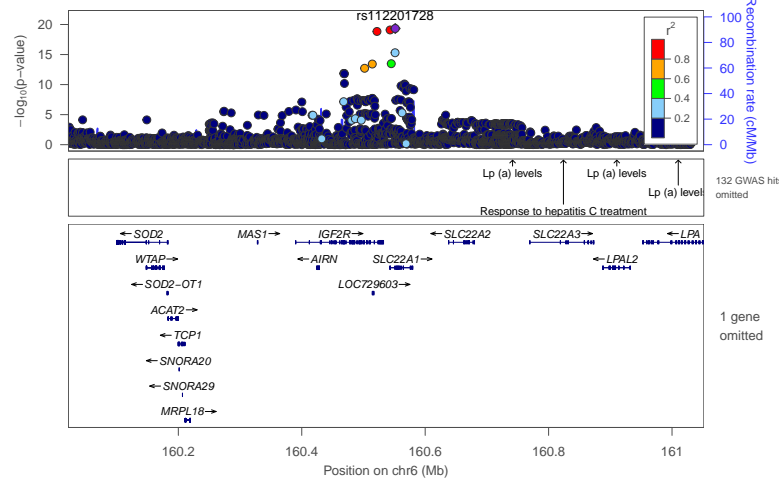

docosatrienoate (22:3n6)\*

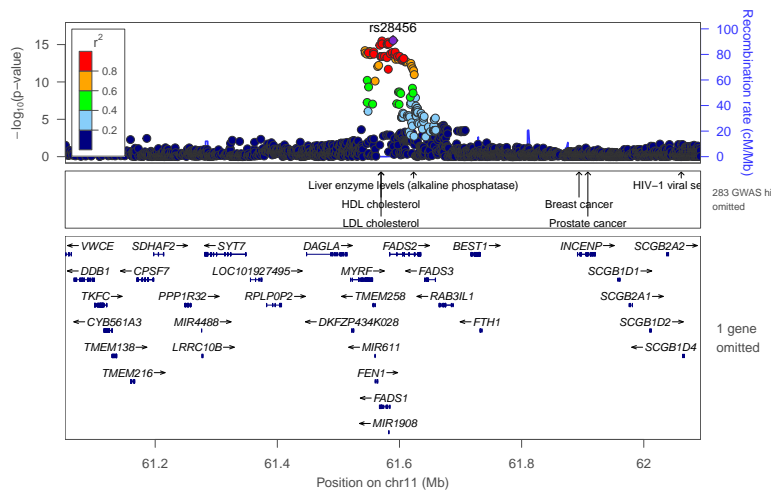

sphingomyelin (d18:0/18:0, d19:0/17:0)\*

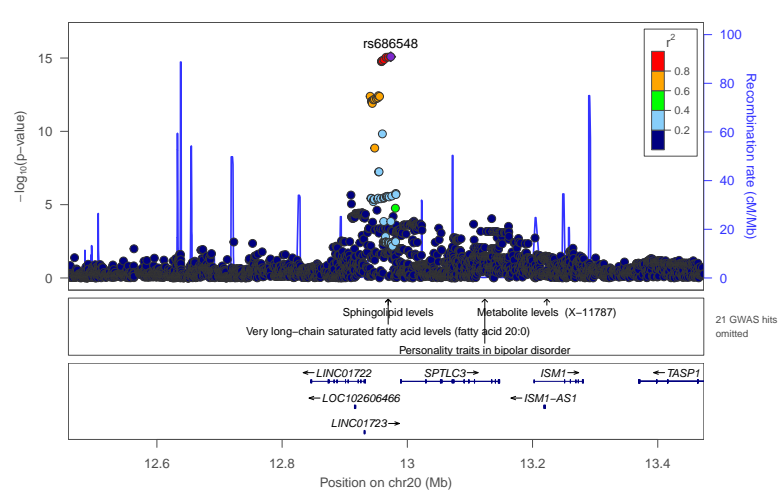

sphingomyelin (d18:1/19:0, d19:1/18:0)\*

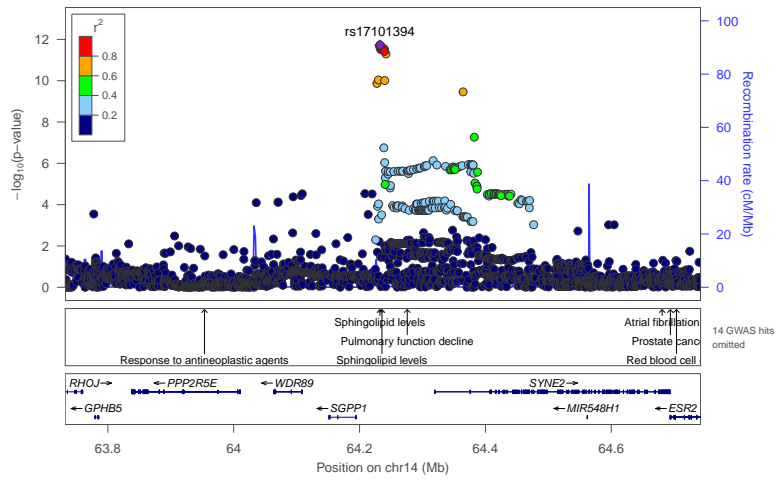

sphingomyelin (d18:1/19:0, d19:1/18:0)\*

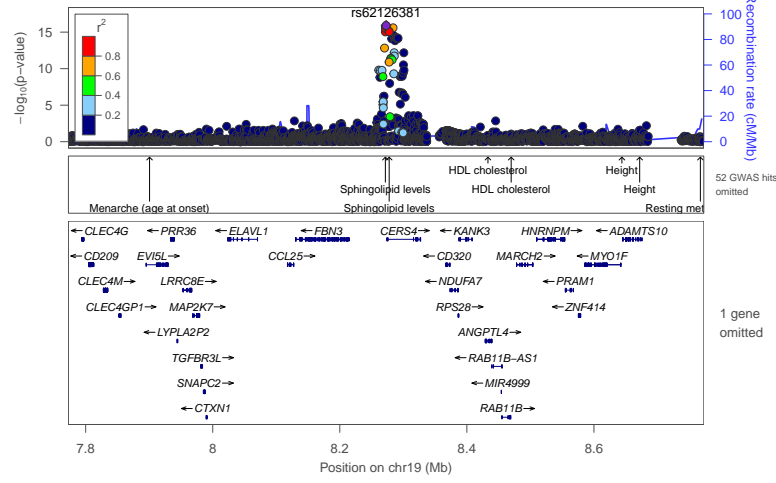

sphingomyelin (d18:1/19:0, d19:1/18:0)\*

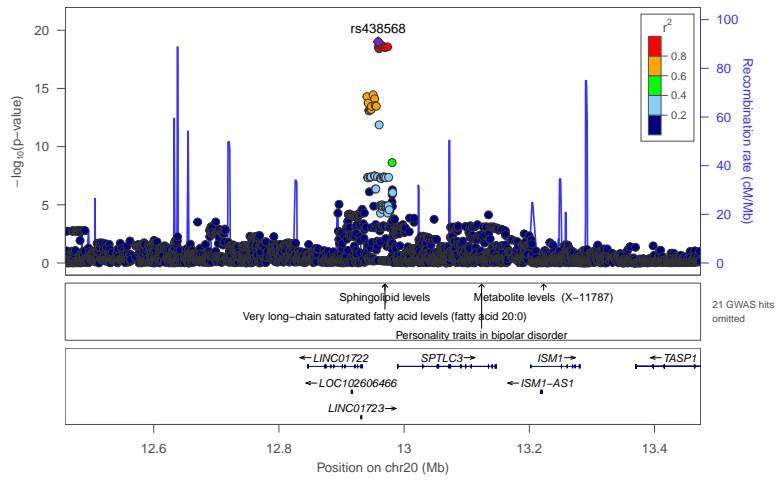

sphingomyelin (d18:0/20:0, d16:0/22:0)\*

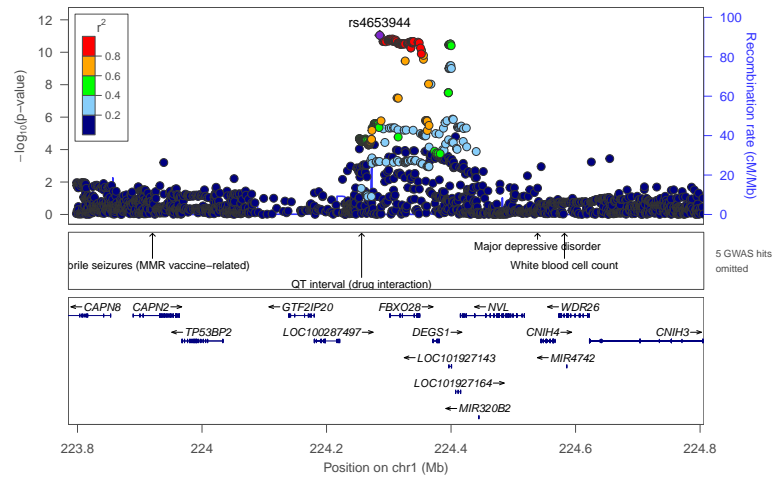

sphingomyelin (d18:0/20:0, d16:0/22:0)\*

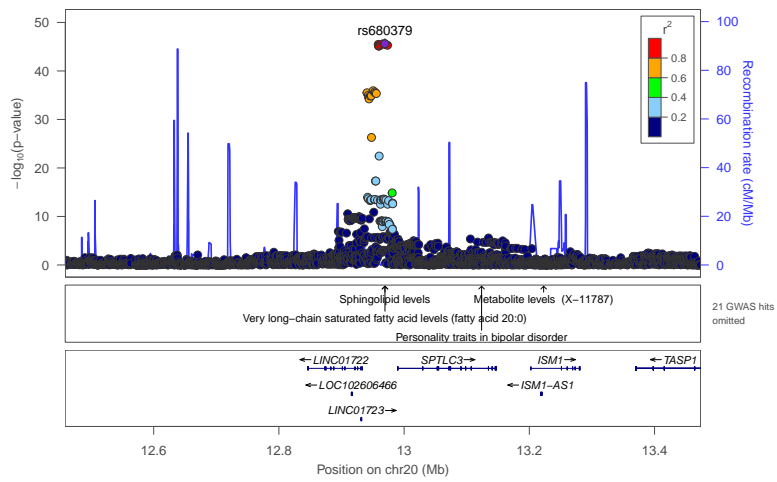

sphingomyelin (d18:1/22:2, d18:2/22:1, d16:1/24:2)\*

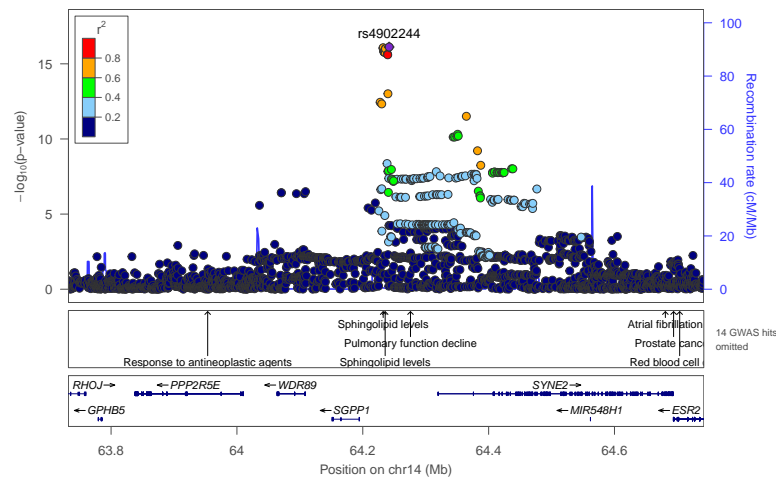

sphingomyelin (d18:1/22:2, d18:2/22:1, d16:1/24:2)\*

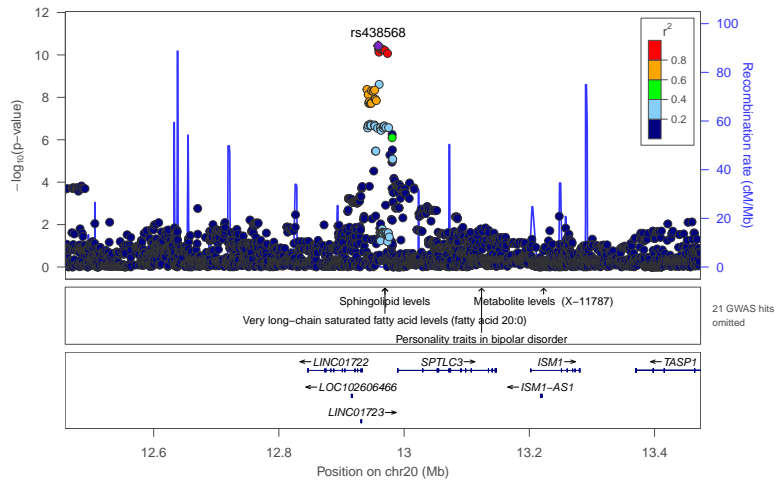

sphingomyelin (d18:1/25:0, d19:0/24:1, d20:1/23:0, d19:1/24:0)\*

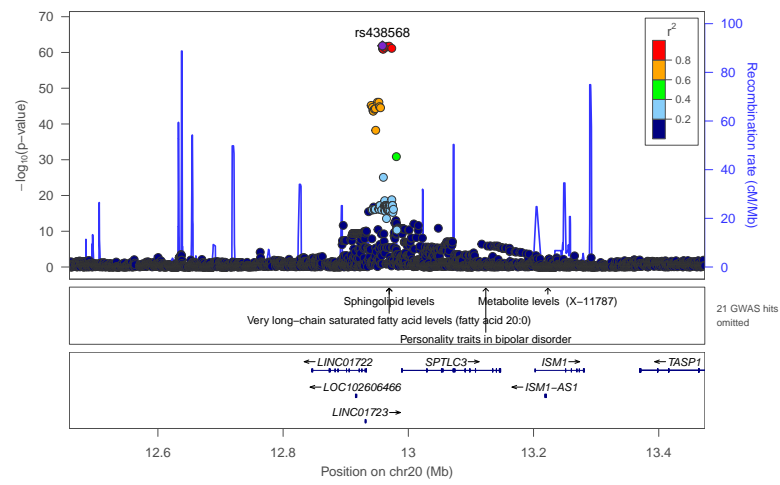

sphingomyelin (d18:2/21:0, d16:2/23:0)\*

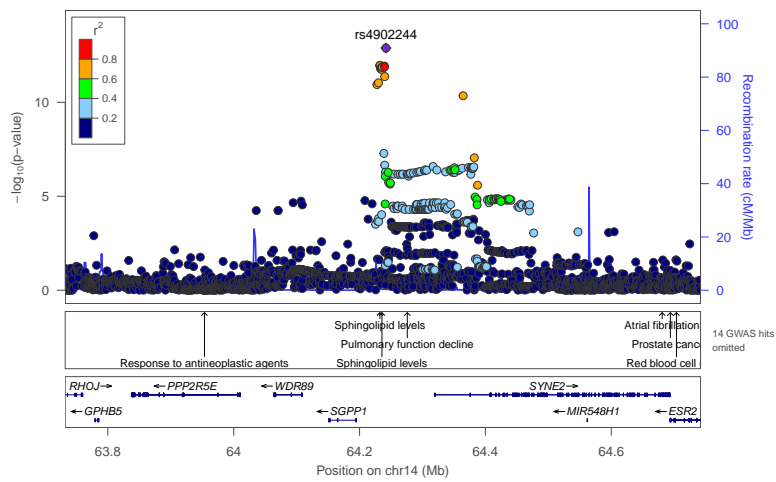

sphingomyelin (d17:2/16:0, d18:2/15:0)\*

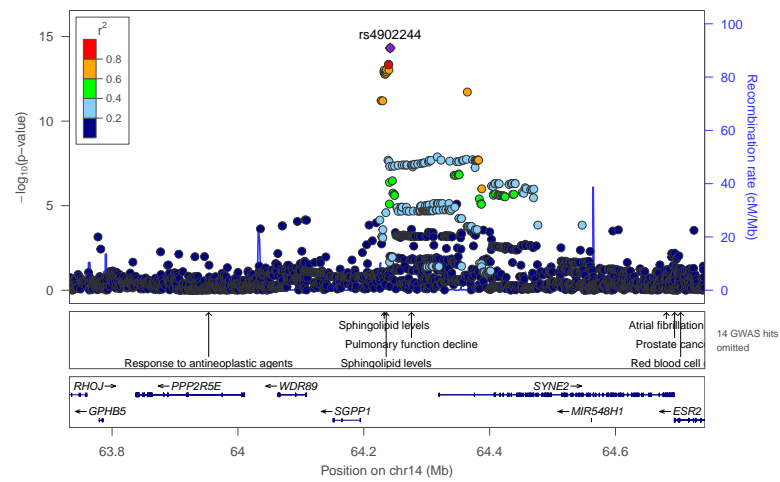

linolenoylcarnitine (C18:3)\*

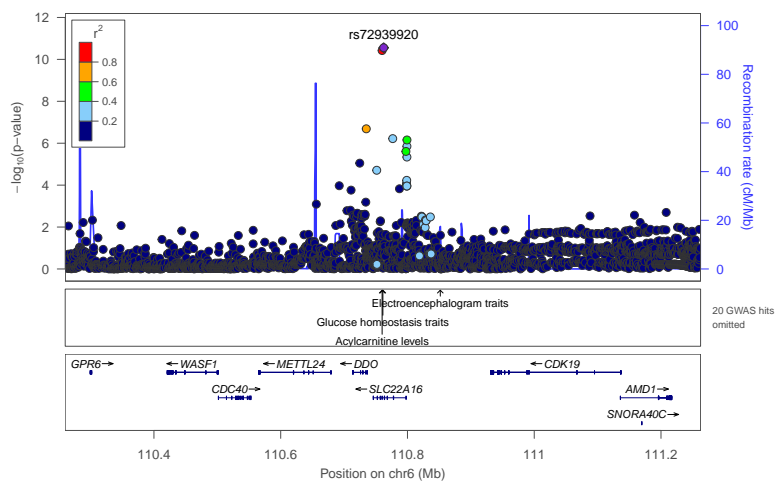

behenoylecarnitine (C22)\*

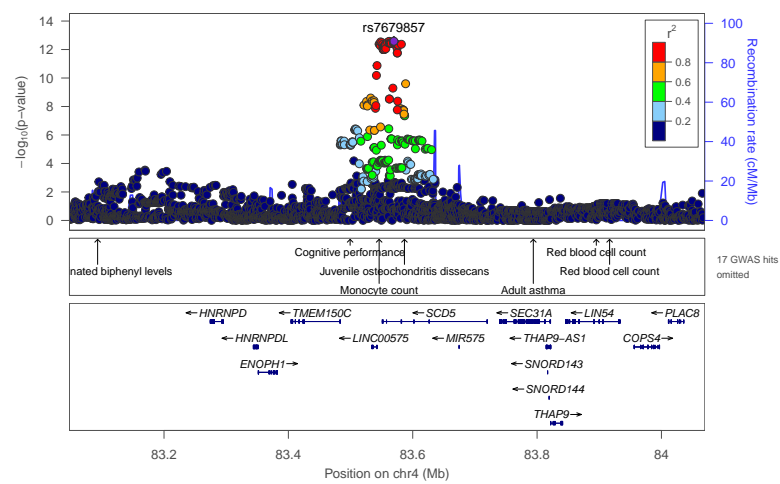

### lignoceroylcarnitine (C24)\*

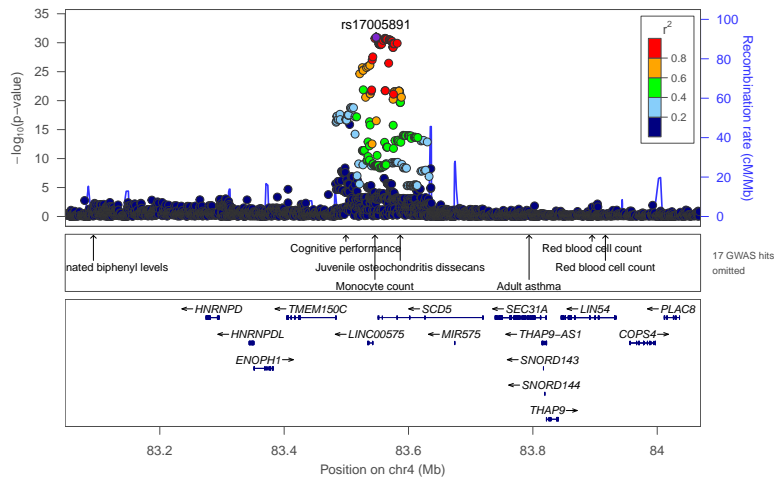

### lignoceroylcarnitine (C24)\*

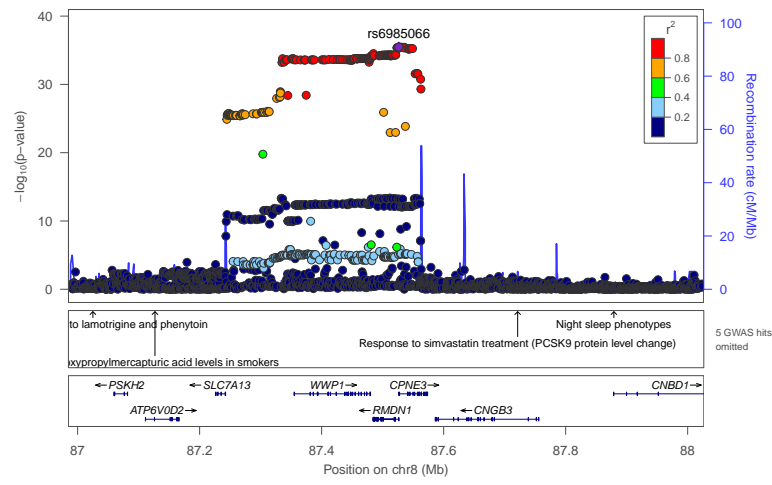

### cerotoylcarnitine (C26)\*

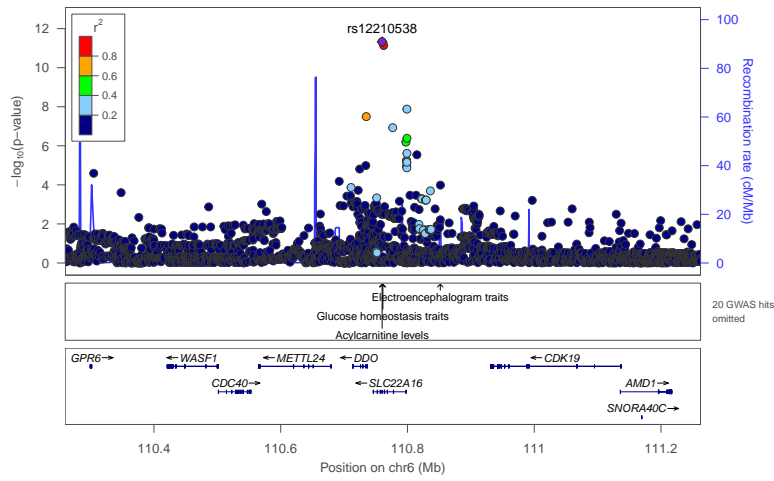

### cerotoylcarnitine (C26)\*

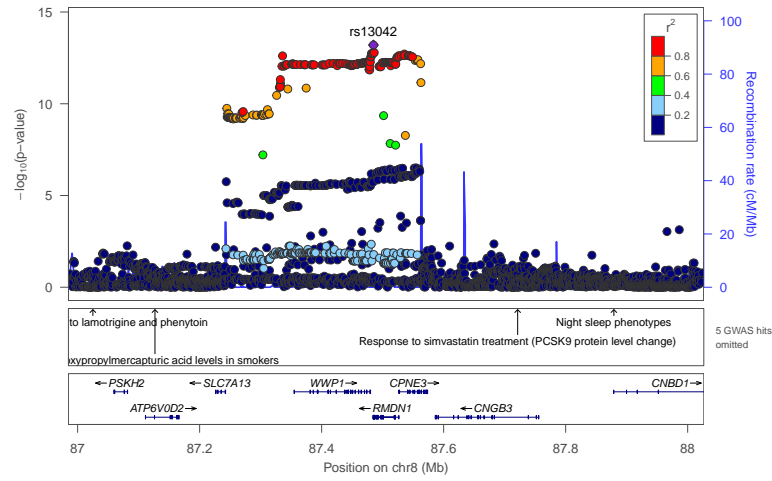

### cerotoylcarnitine (C26)\*

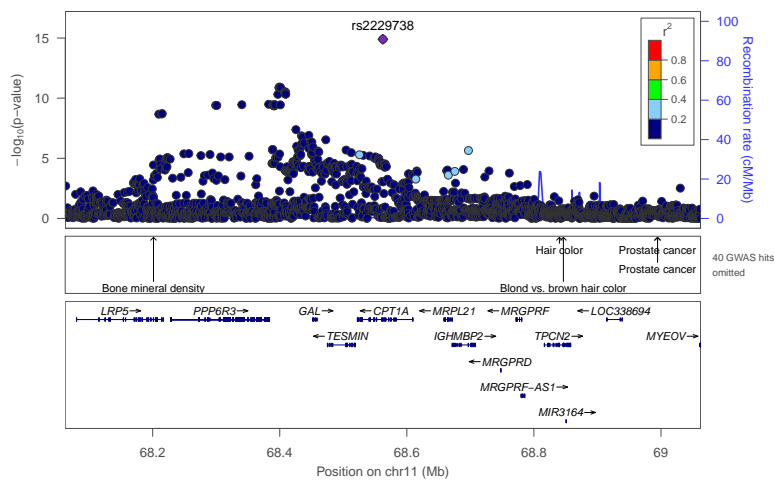

### ximenoylcarnitine (C26:1)\*

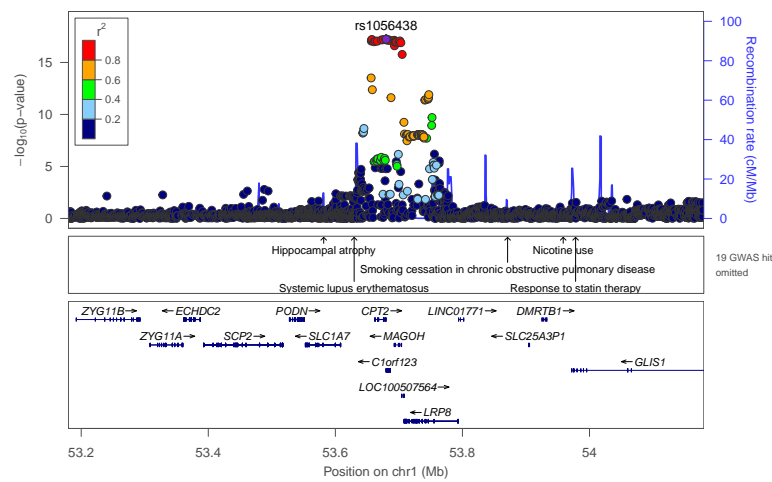

ximenoylcarnitine (C26:1)\*

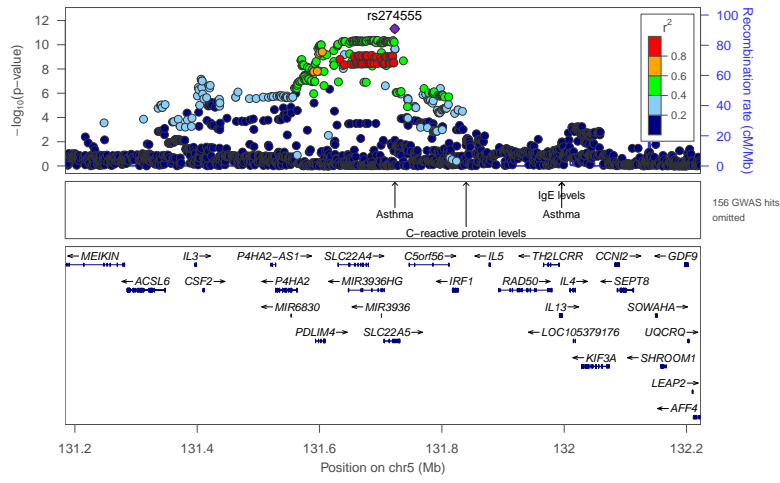

ximenoylcarnitine (C26:1)\*

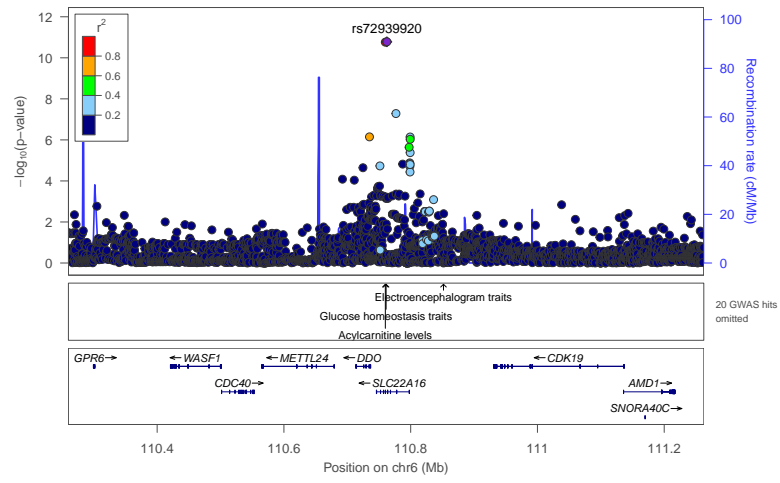

ximenoylcarnitine (C26:1)\*

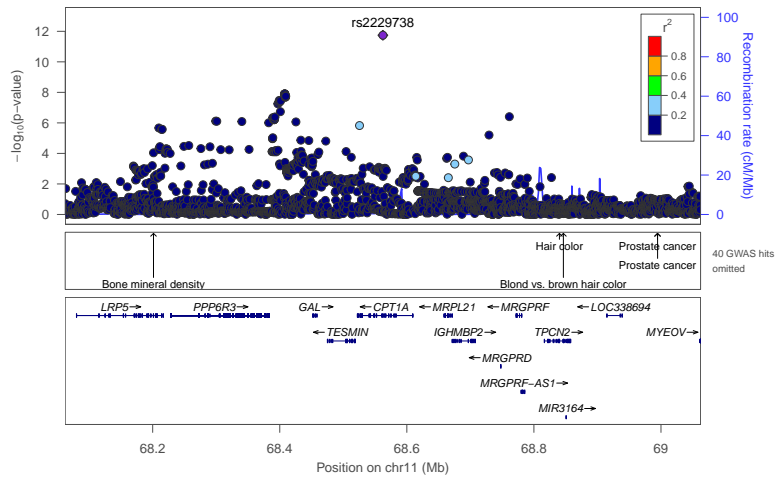

arachidonoylcarnitine (C20:4)

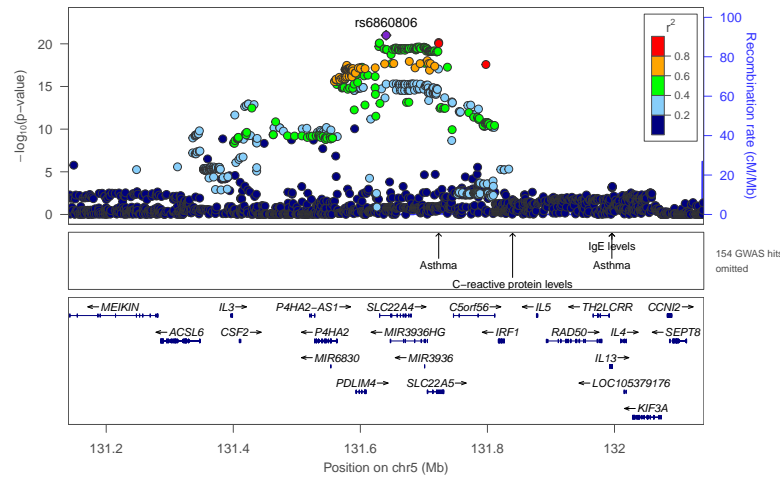

arachidonoylcarnitine (C20:4)

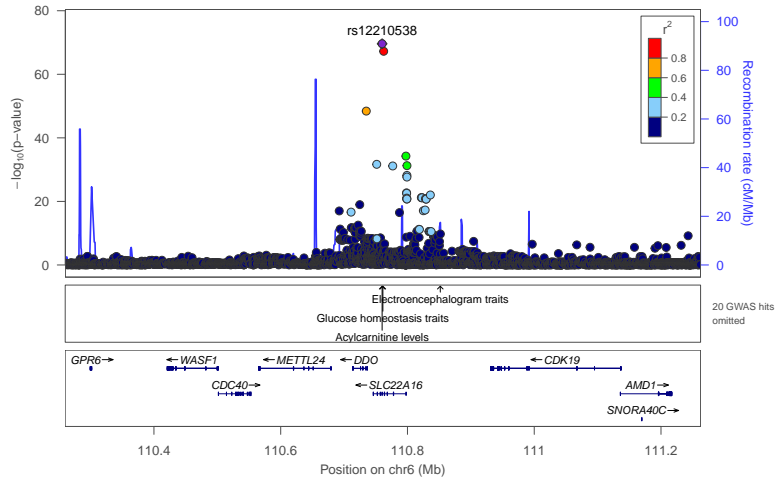

arachidonoylcarnitine (C20:4)

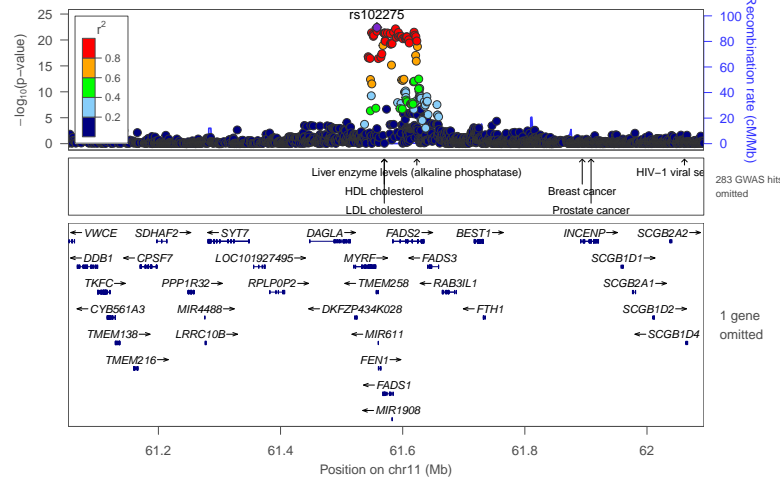



dihomo-linoleylcarnitine (C20:2)\*

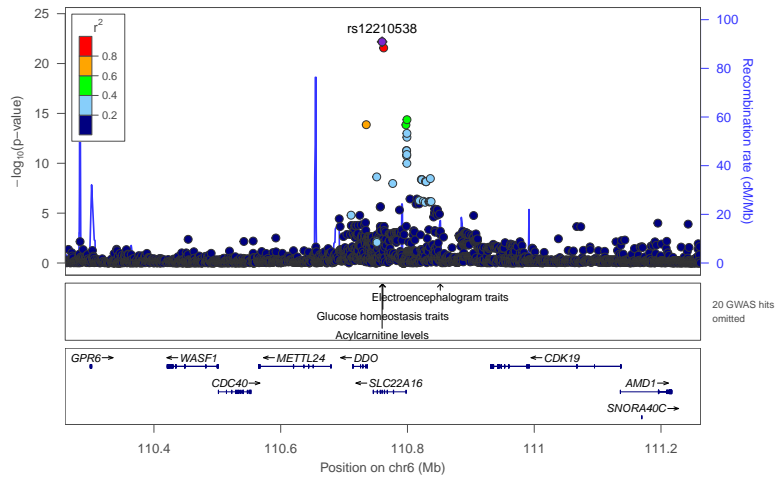

dihomo-linolenylcarnitine (C20:3n3 or 6)\*

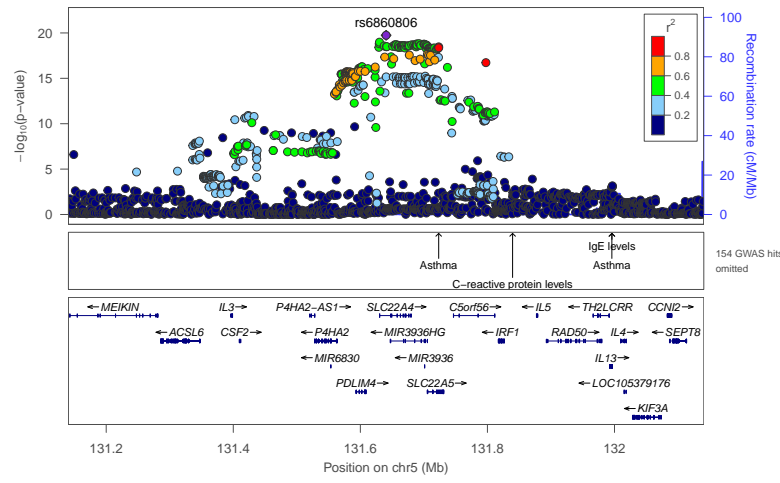

dihomo-linolenylcarnitine (C20:3n3 or 6)\*

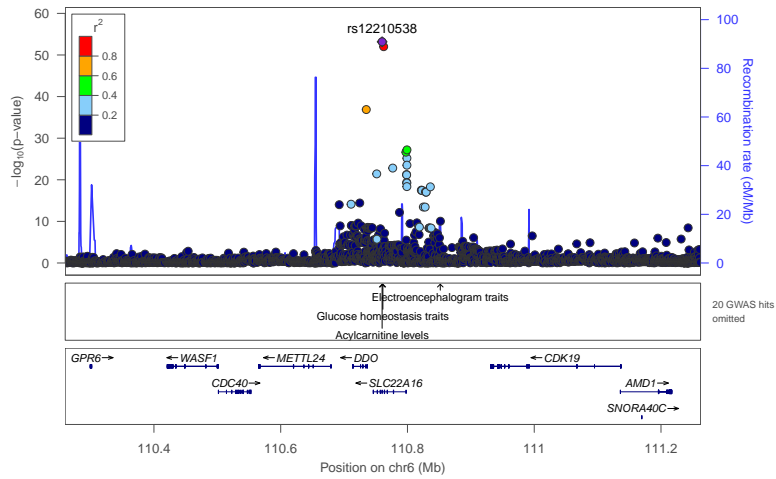

nervonoylcarnitine (C24:1)\*

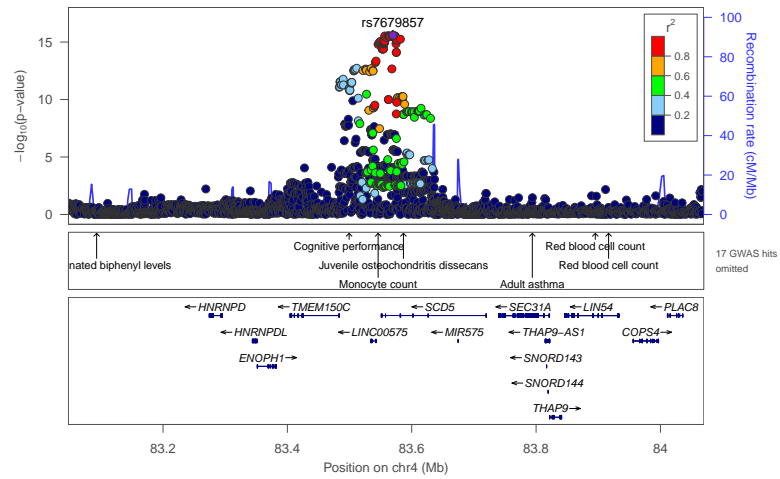

nervonoylcarnitine (C24:1)\*

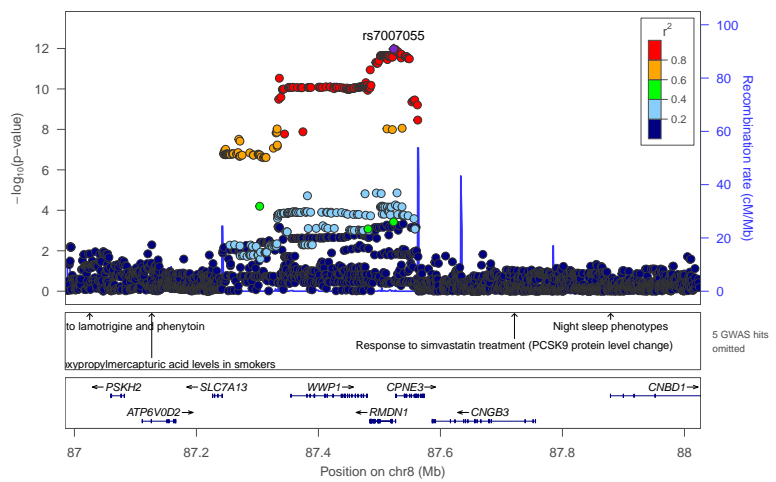

2'-O-methylcytidine

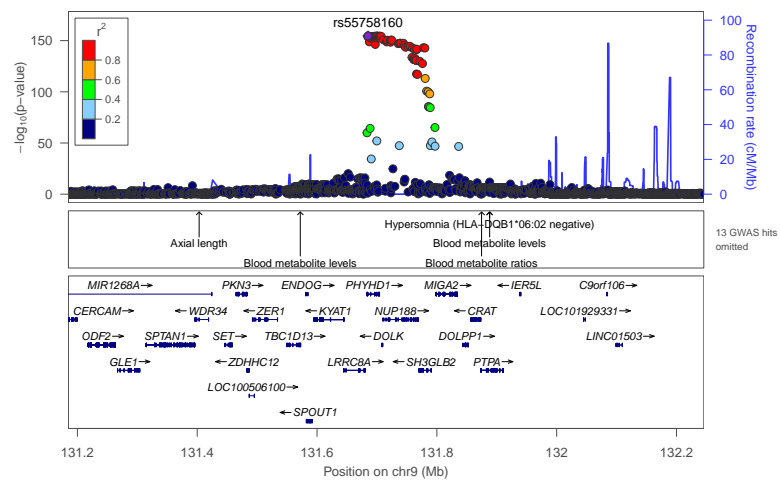



glycosyl ceramide (d18:1/20:0, d16:1/22:0)\*

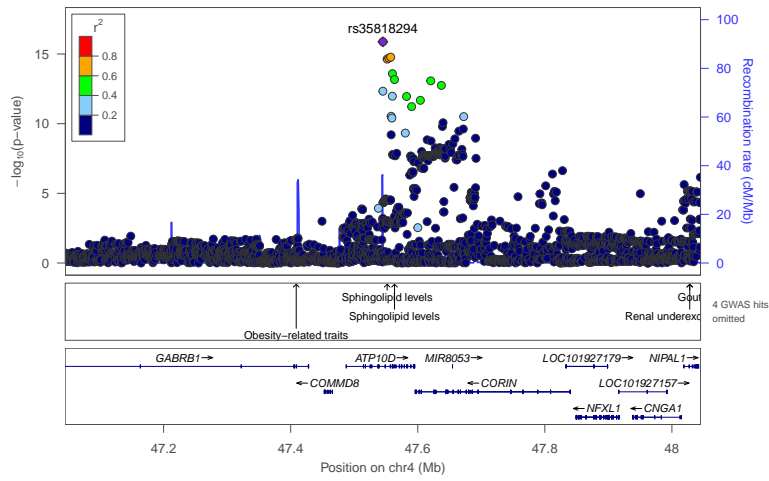

glycosyl ceramide (d18:1/20:0, d16:1/22:0)\*

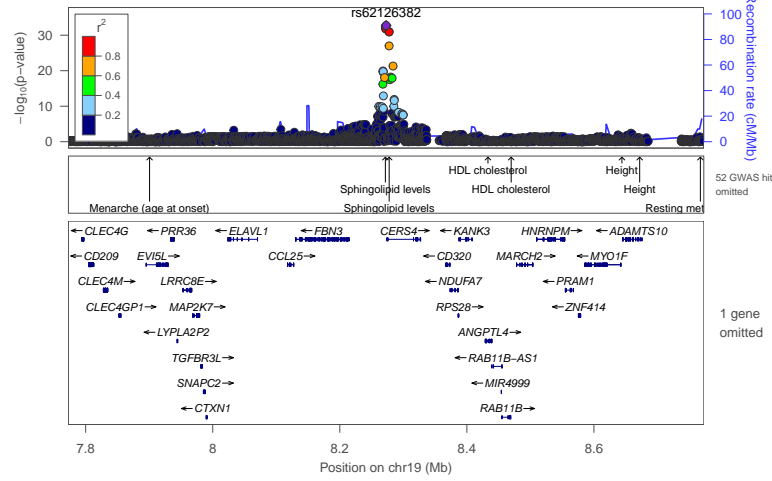

carotene diol (1)

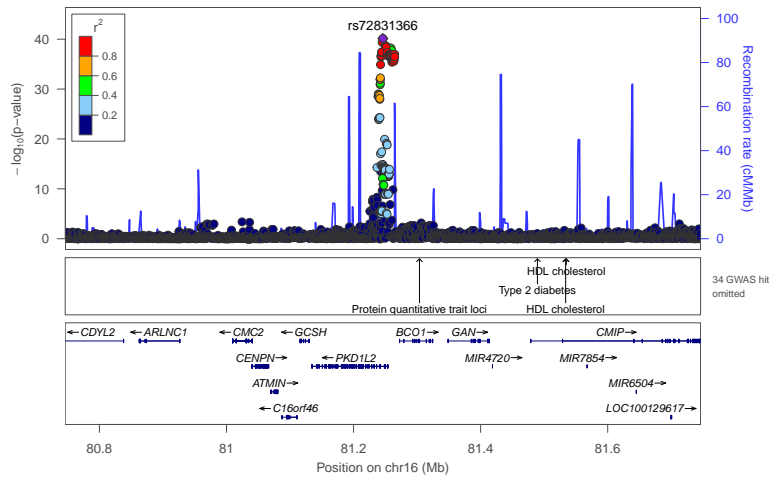

carotene diol (2)

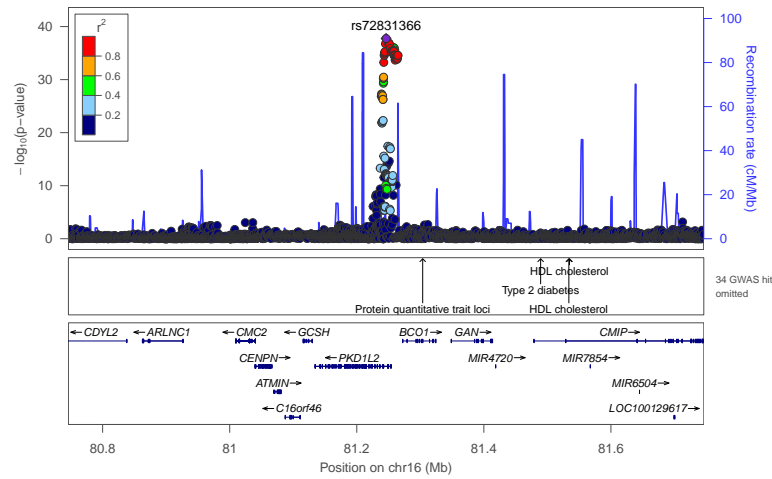

carotene diol (3)

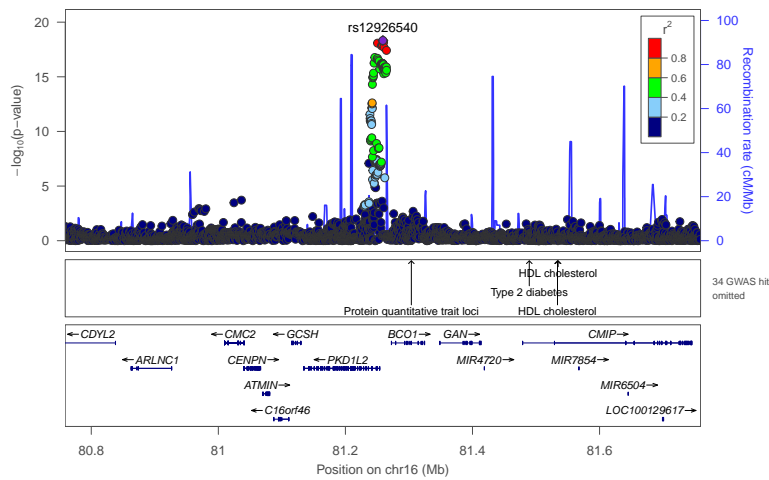

2'-O-methyluridine

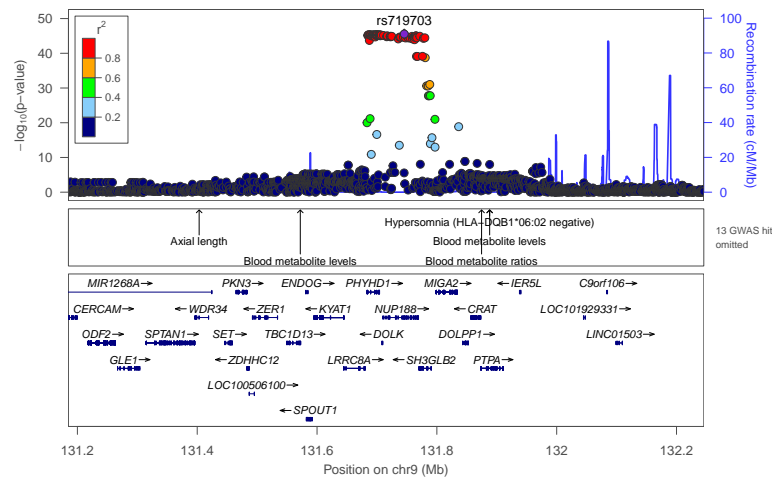

### N-oleoylserine

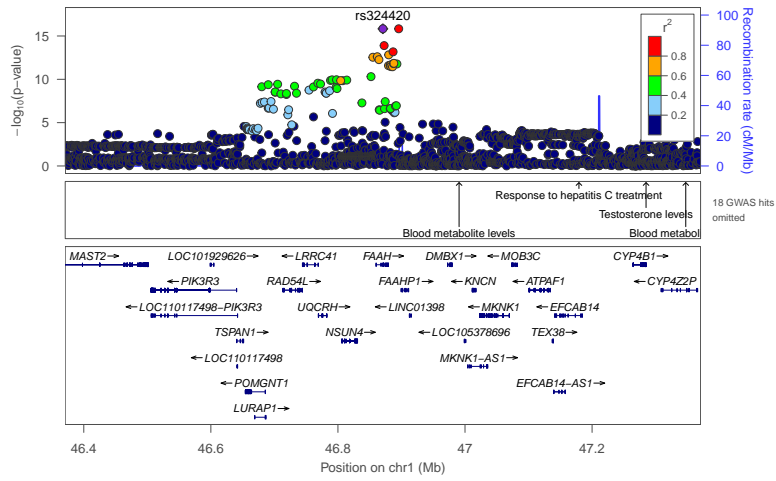

### N,N,N-trimethyl-5-aminovaleate

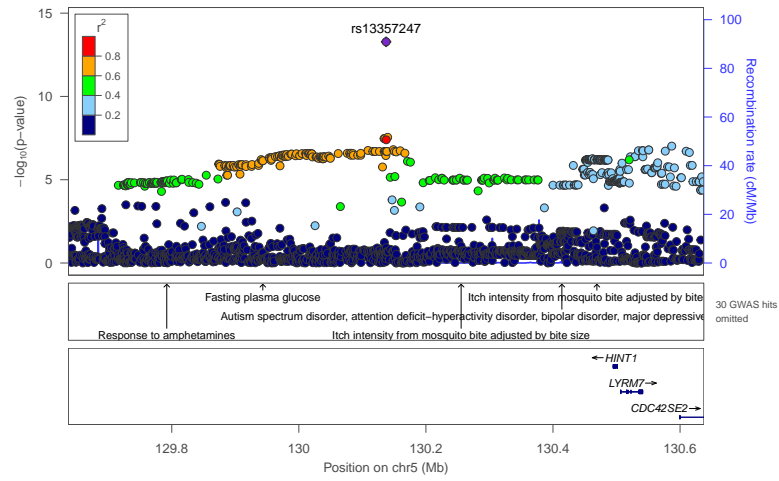

### N,N,N-trimethyl-5-aminovaleate

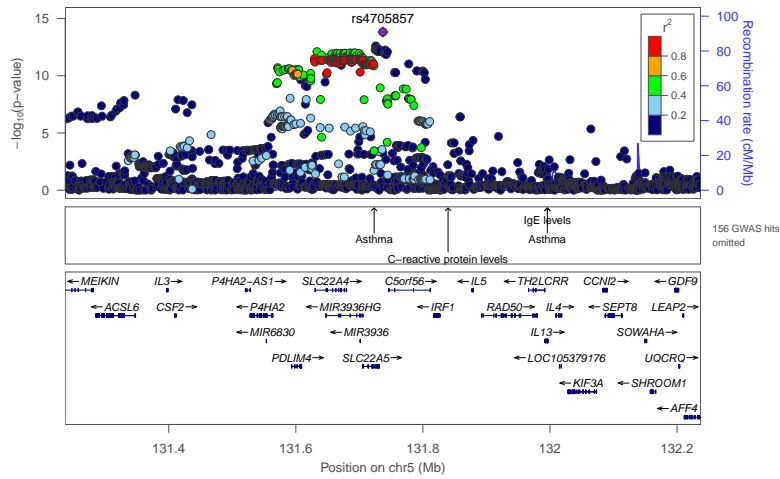

### N(1)-acetylspermidine

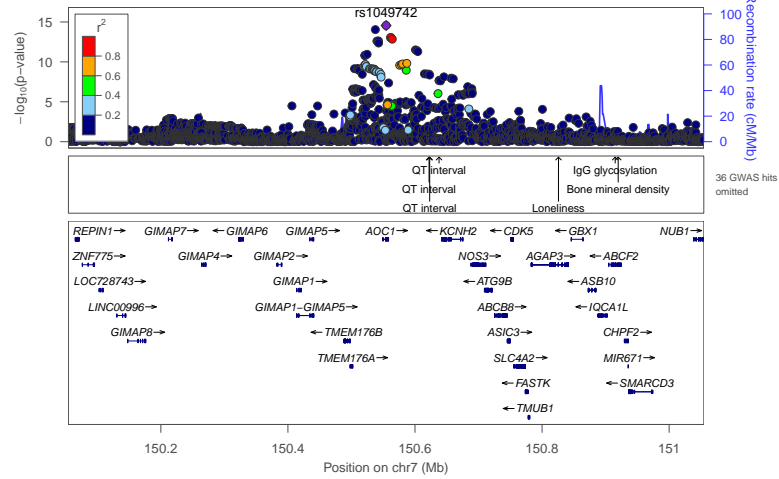

### N(1)-acetylspermidine

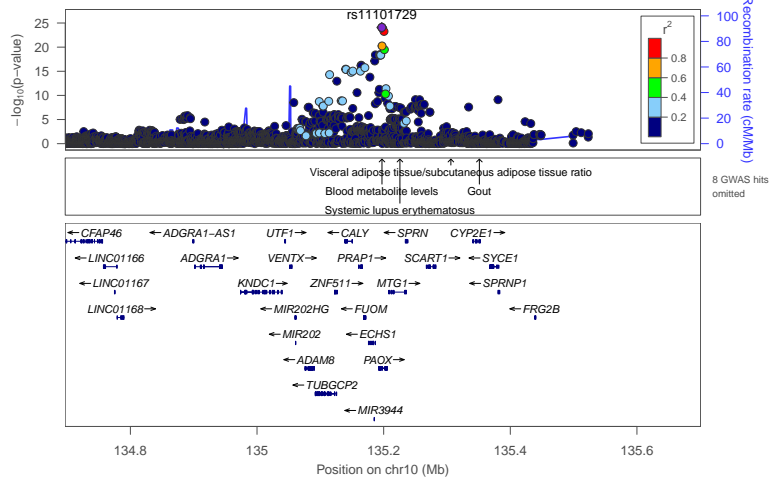

### N(1)-acetylspermidine

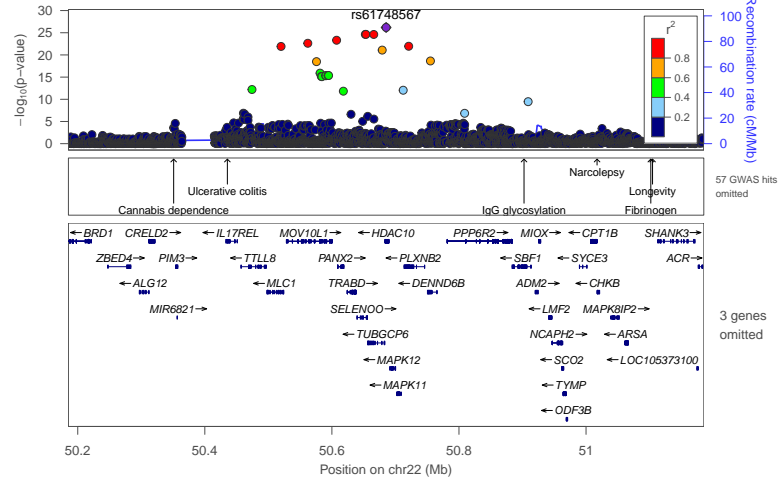

### cortolone glucuronide (1)

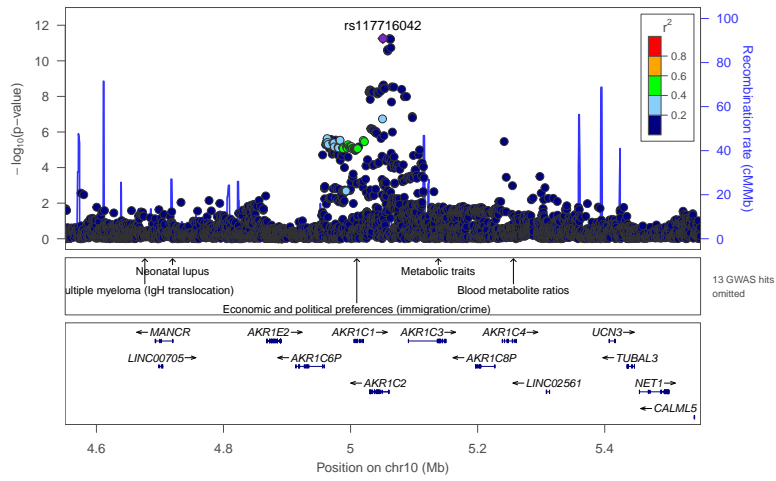

### X - 24947

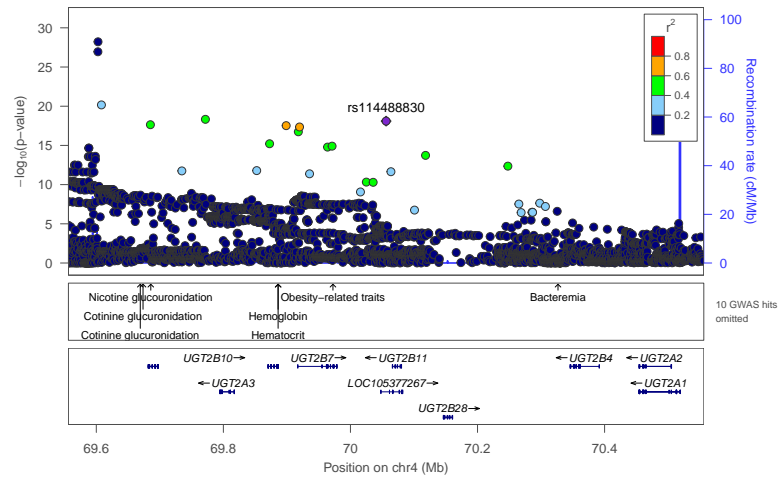

### X - 24947

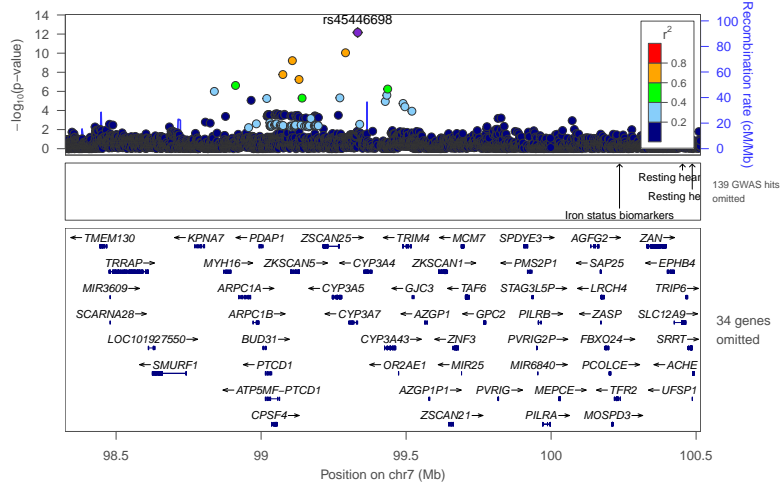

### X - 24947

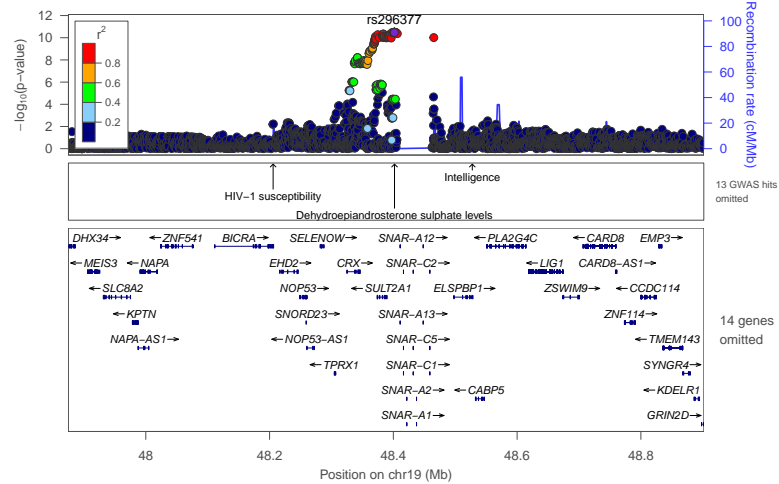

### X - 24949

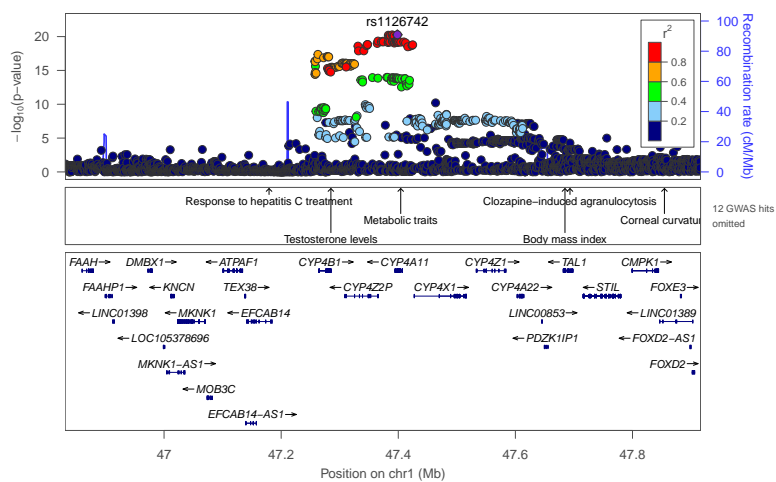

### X - 24949

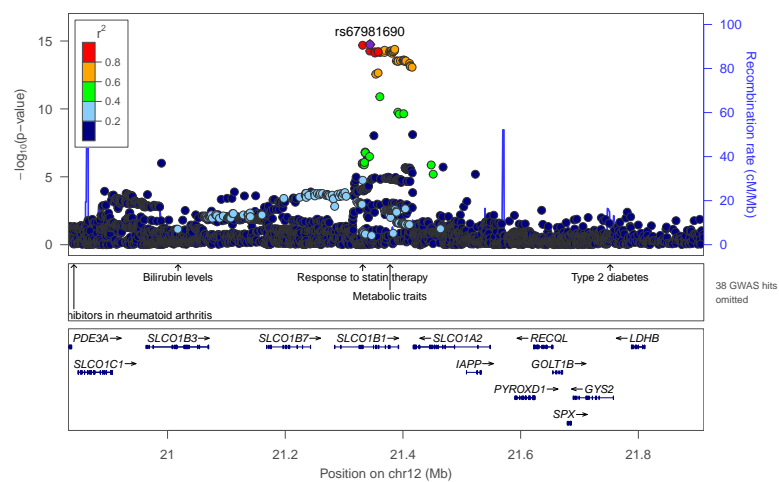

glycocholate sulfate\*

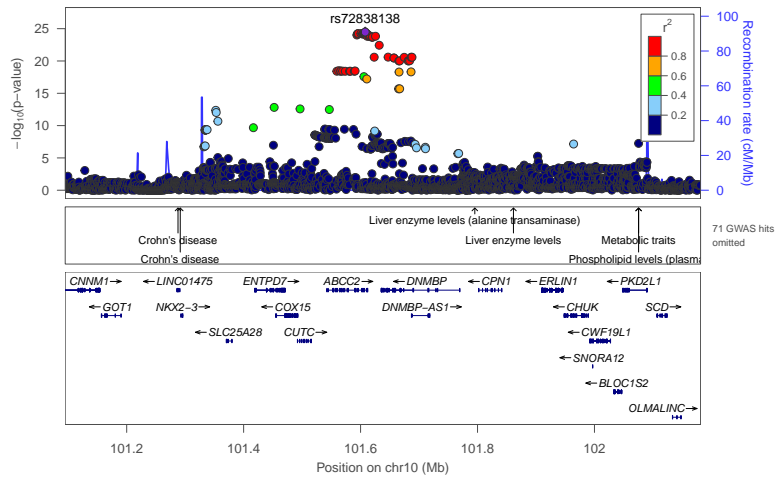

glycocholate sulfate\*

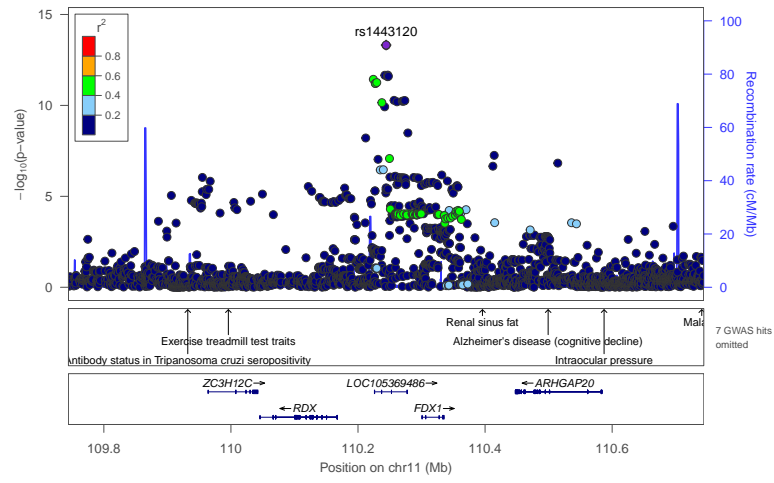

glycocholate sulfate\*

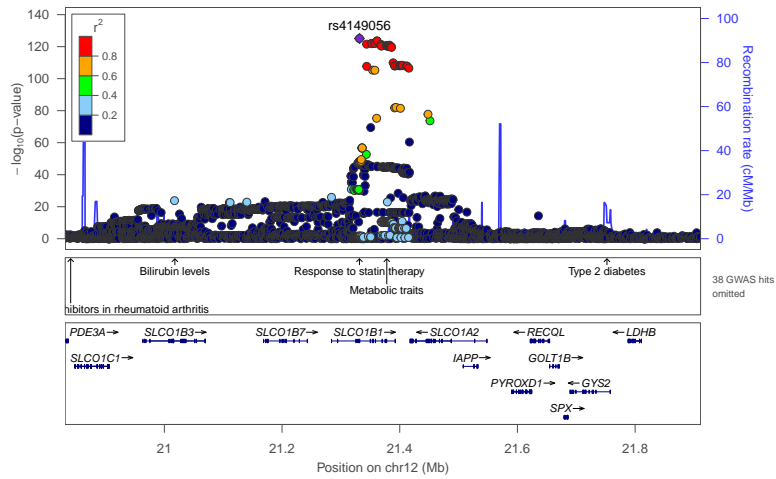

3-methylglutaconate

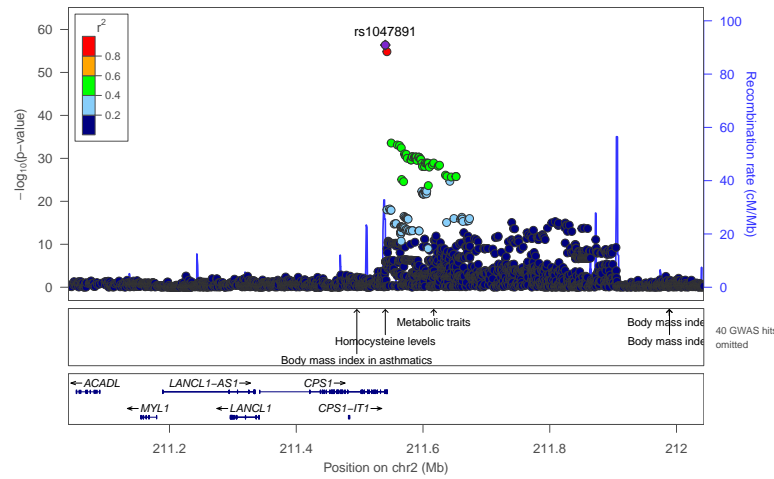

3-methylglutaconate

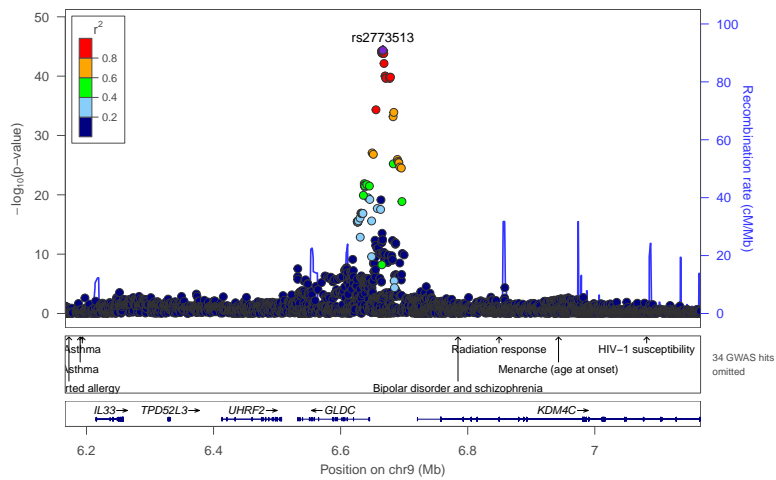

gluconate

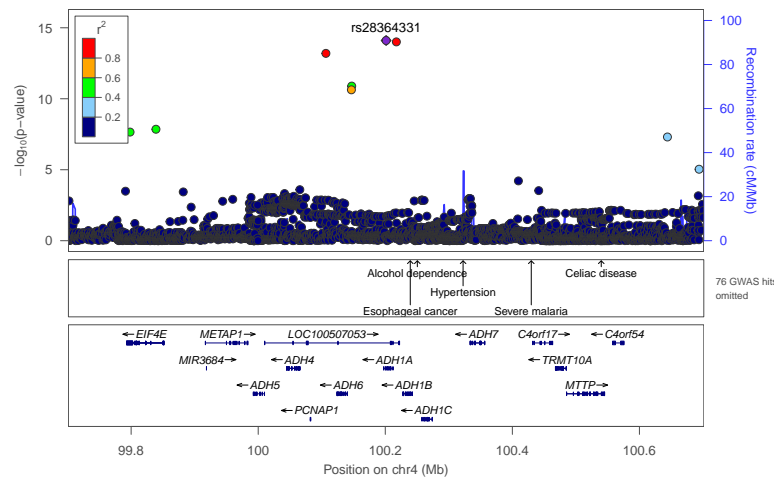

### glycine

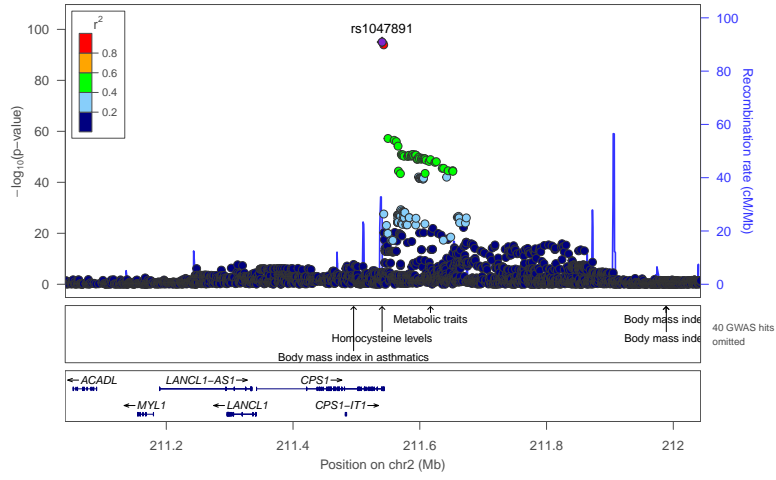

### dihydroorotate

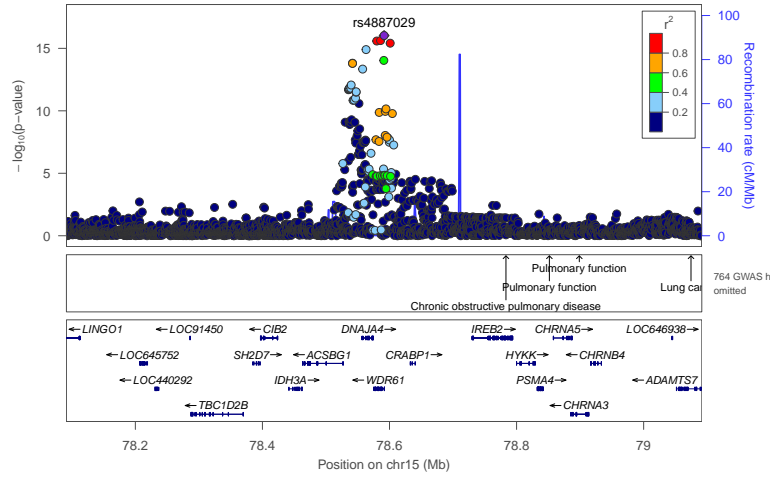

### trans-urocanate

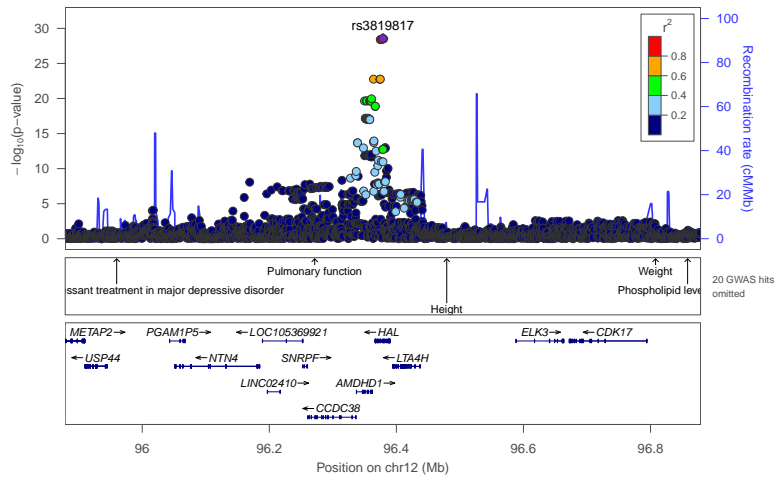

### nonanoylcarnitine (C9)

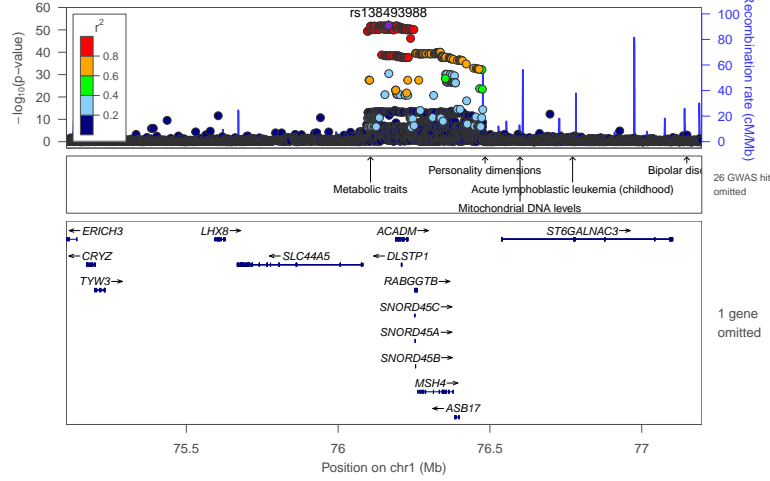

### nonanoylcarnitine (C9)

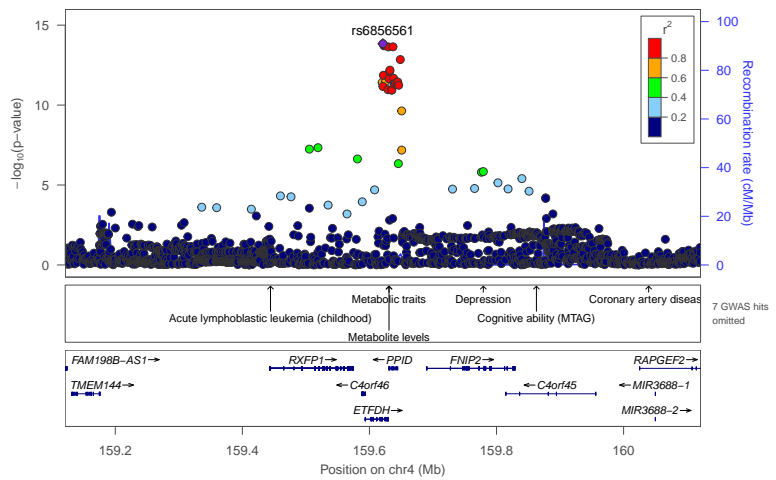

### androsterone glucuronide

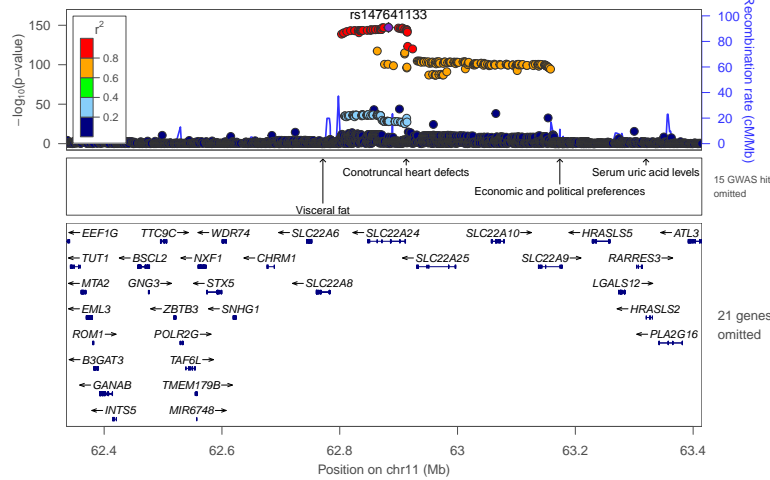

androsterone glucuronide

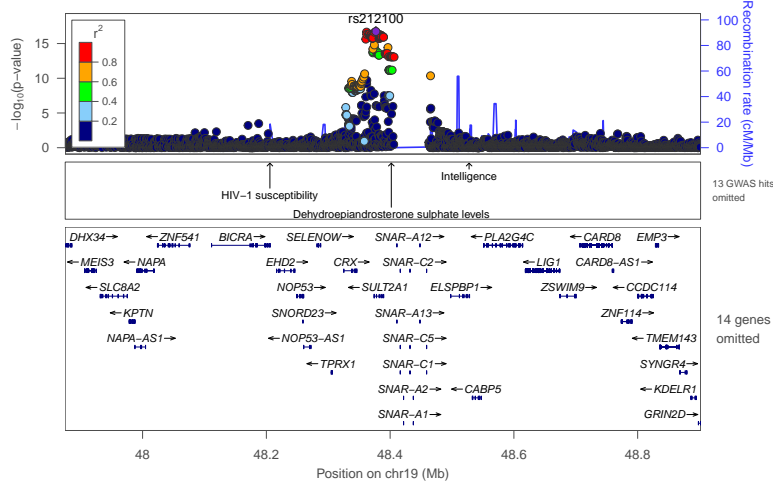

octadecadienedioate (C18:2-DC)\*

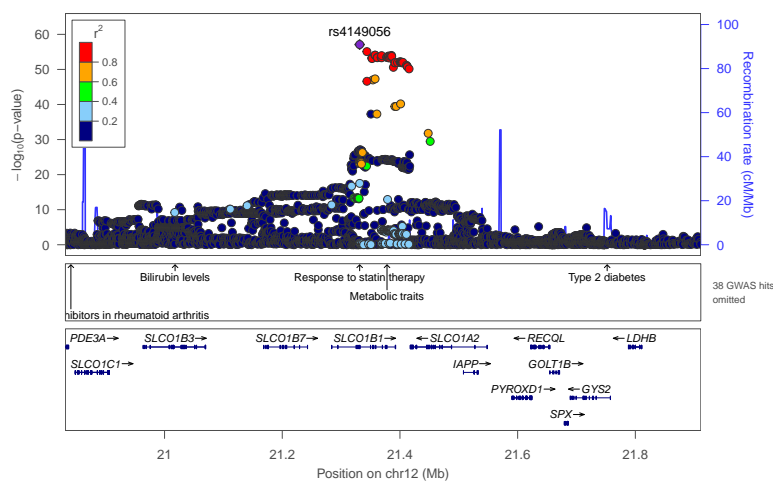

octadecenedioate (C18:1-DC)

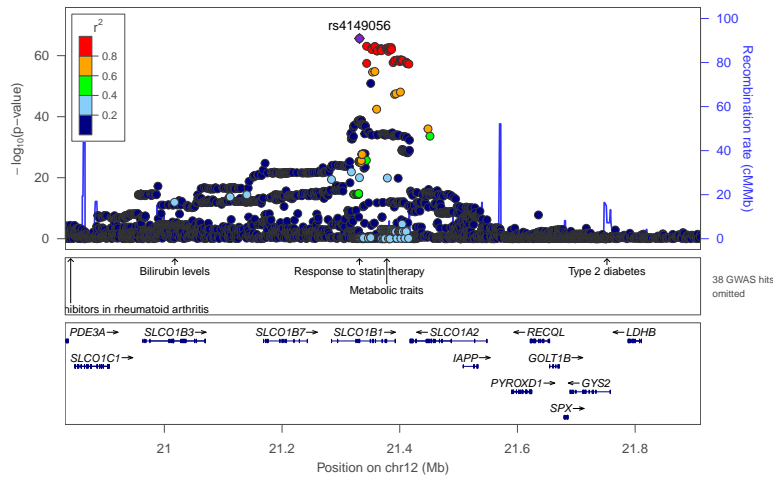

hexadecenedioate (C16:1-DC)\*

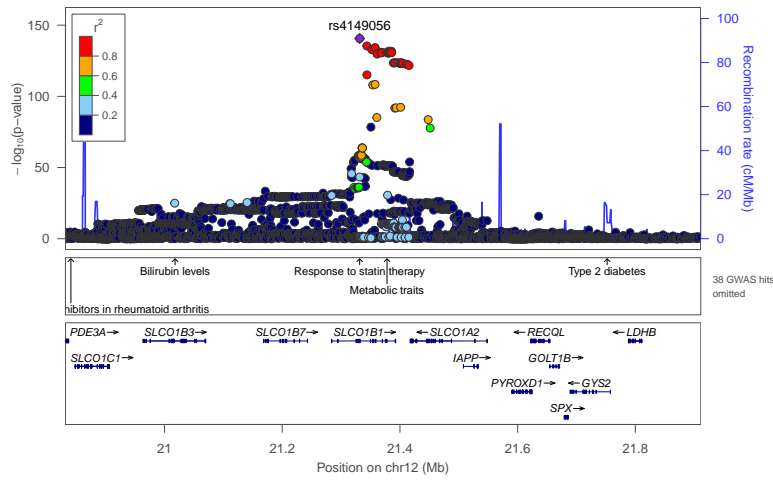

octadecenedioly carnitine (C18:1-DC)\*

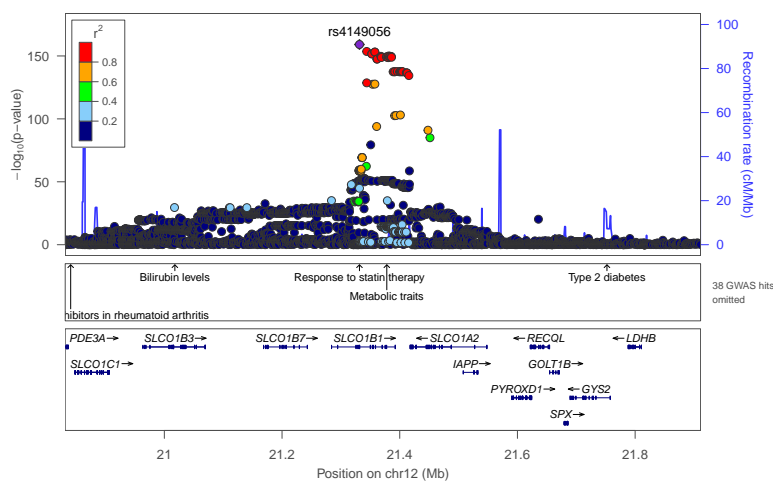

octadecanedioly carnitine (C18-DC)\*

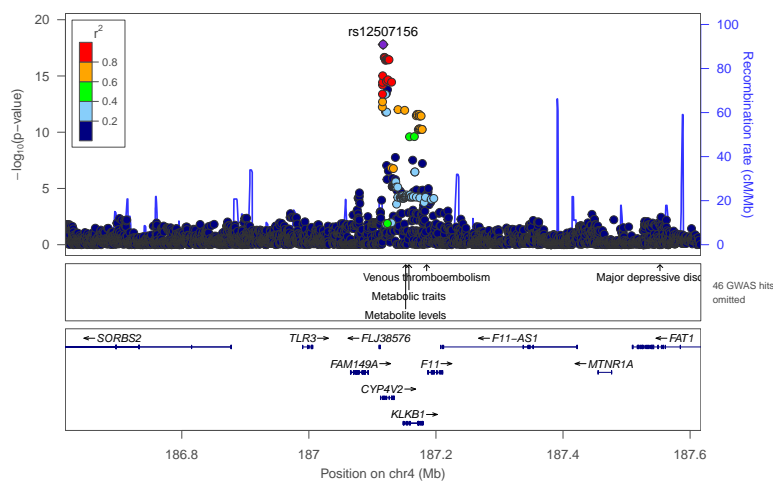



octadecanedioylcarnitine (C18-DC)\*

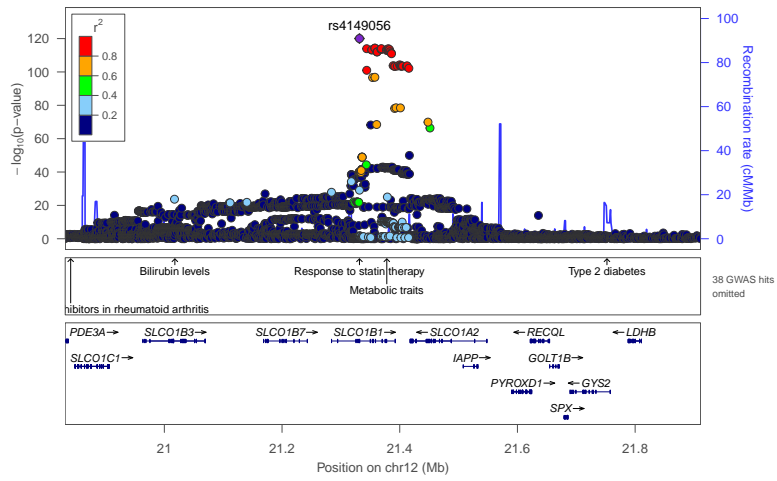

3-carboxy-4-methyl-5-pentyl-2-furanpropionate (3-CMPFP)\*\*

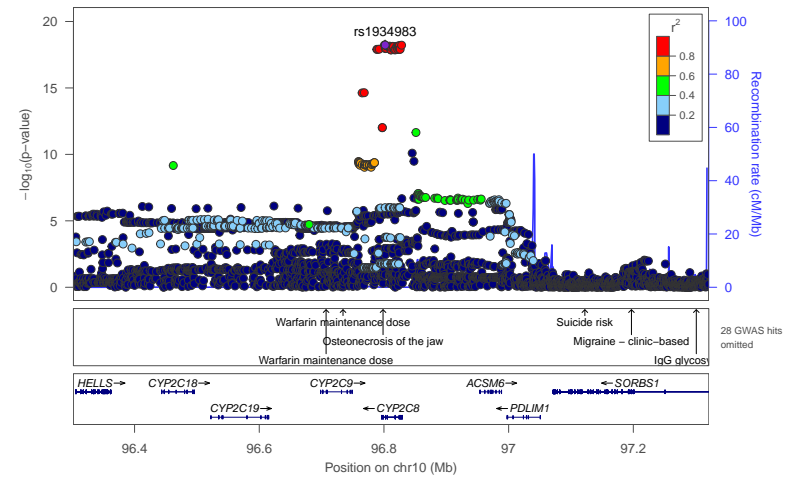

N-acetyl-2-aminooctanoate\*

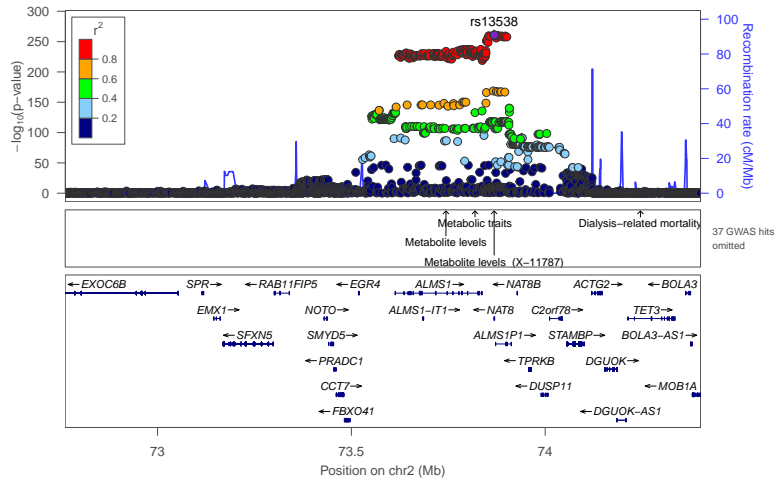

3-hydroxybutyrylglycine\*\*

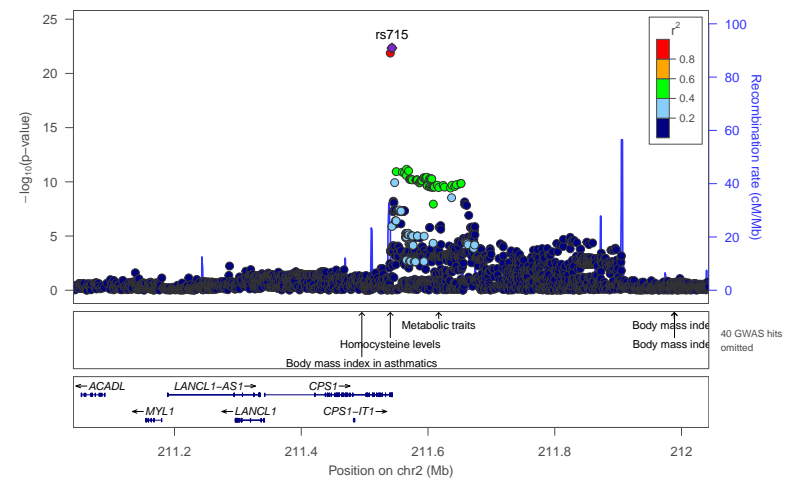

glyco-beta-muricholate\*\*

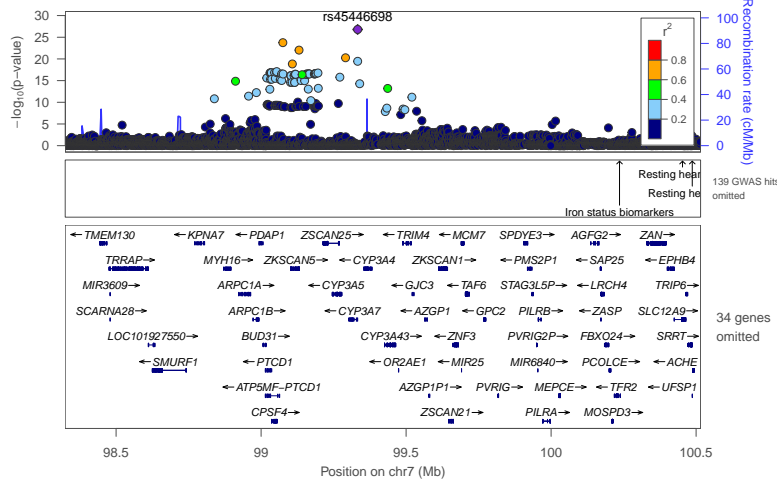

3-hydroxyadipate

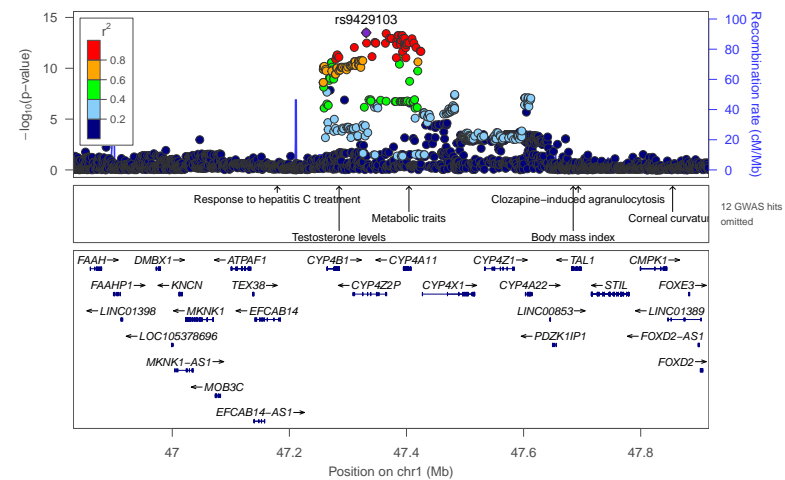

### alpha-ketoglutarate\*

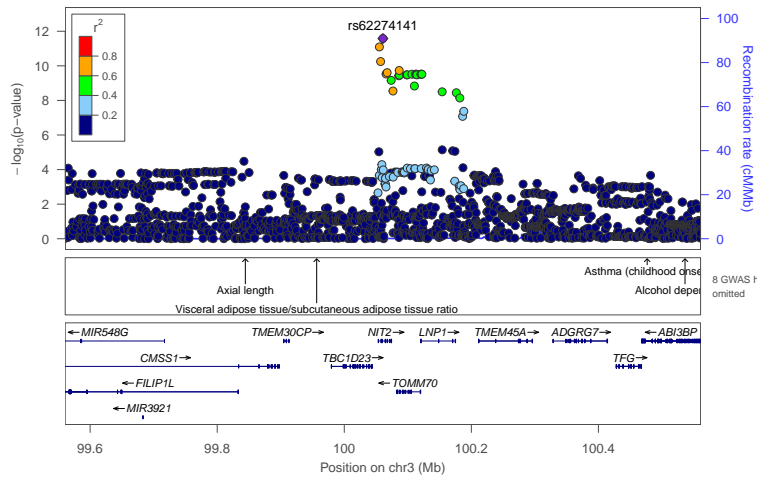

### cysteinylglycine disulfide\*

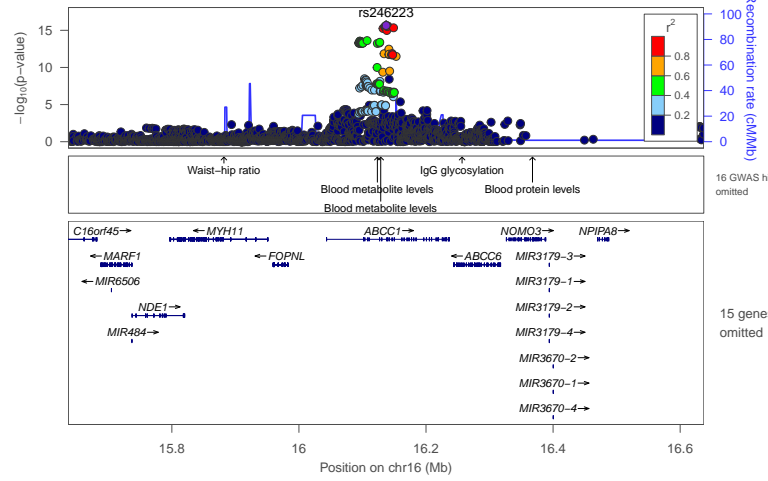

### cysteinylglycine disulfide\*

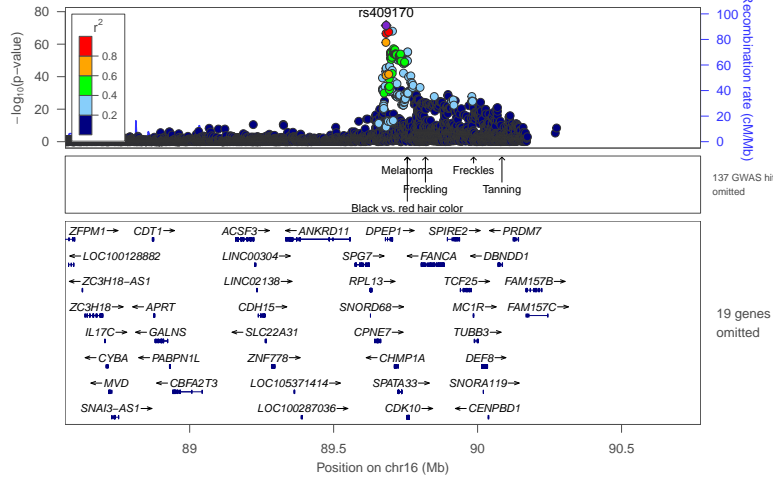

### glycine conjugate of C10H14O2 (1)\*

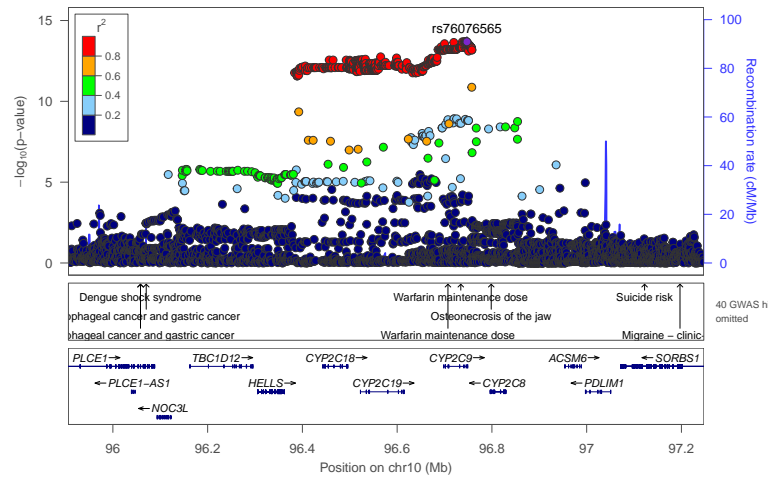

### sphingomyelin (d17:1/14:0, d16:1/15:0)\*

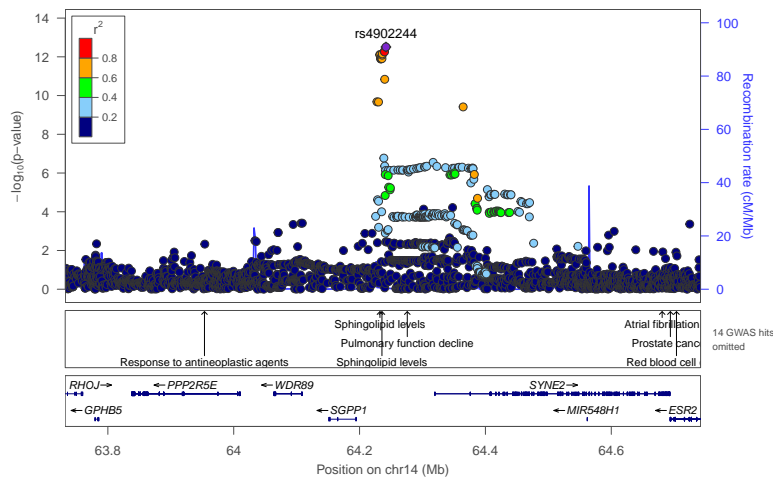

### dodecadienoate (12:2)\*

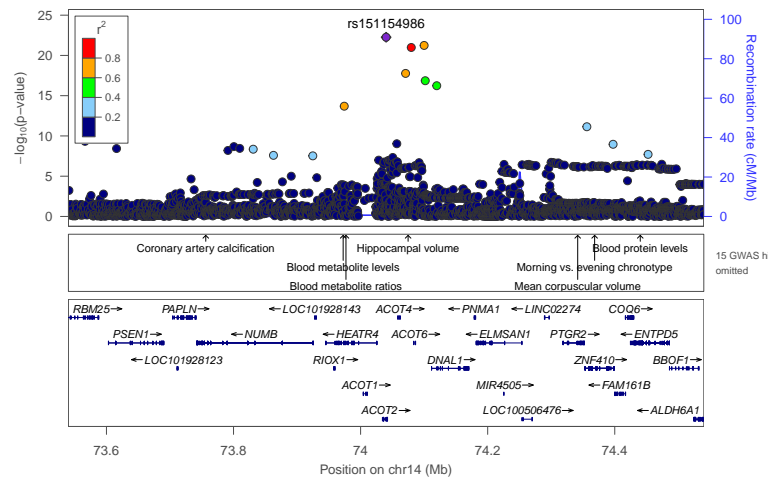

indoleacetyl carnitine\*

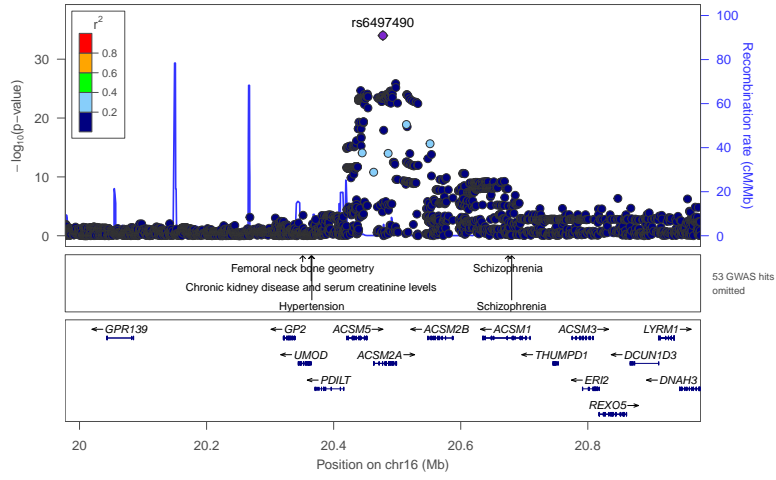

glucuronide of piperine metabolite C17H21NO3 (3)\*

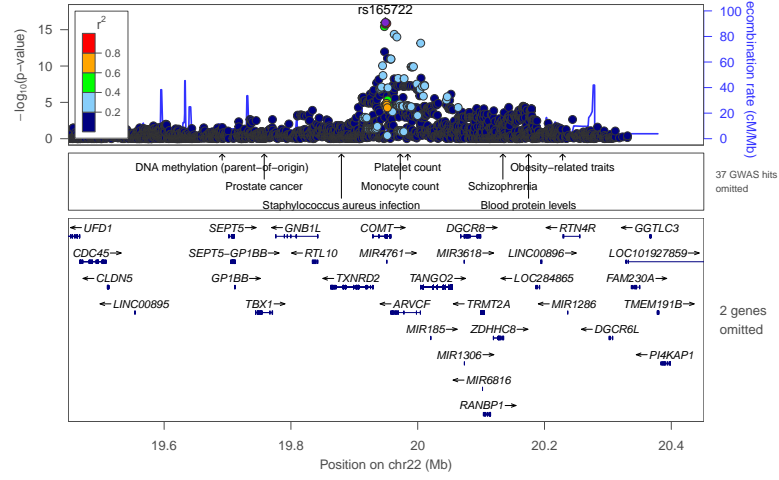

glucuronide of piperine metabolite C17H21NO3 (4)\*

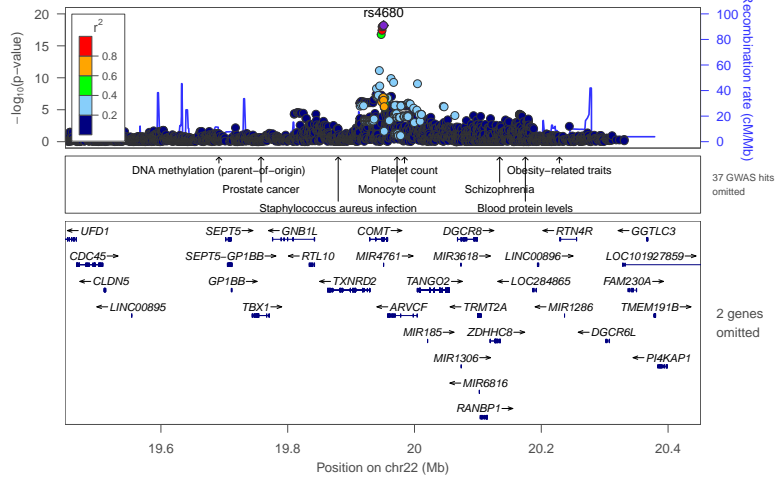

glucuronide of piperine metabolite C17H21NO3 (5)\*

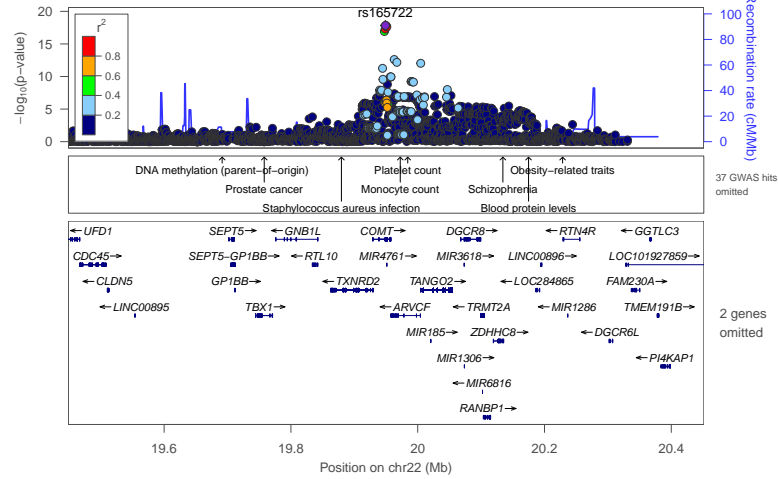

sulfate of piperine metabolite C18H21NO3 (1)\*

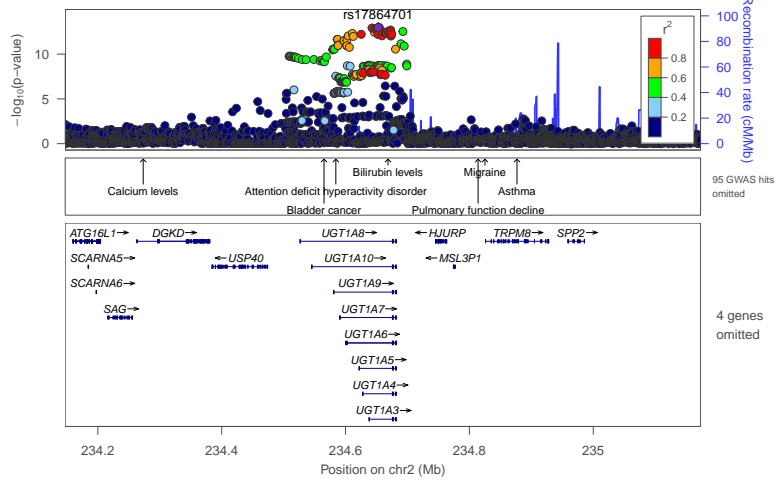

sulfate of piperine metabolite C18H21NO3 (1)\*

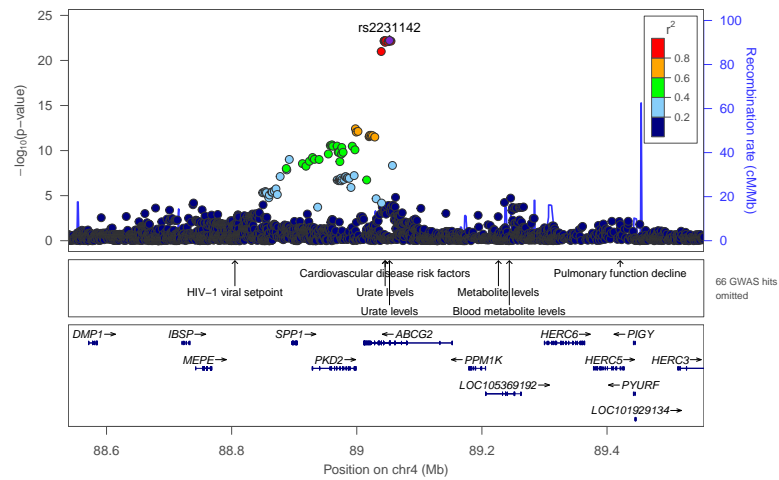

### sulfate of piperine metabolite C<sub>18</sub>H<sub>21</sub>NO<sub>3</sub> (3)\*

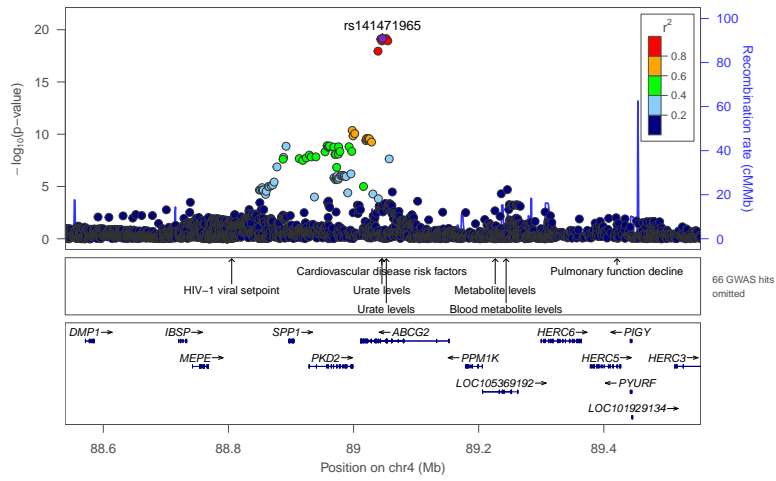

### N-acetyl-isoptureanine

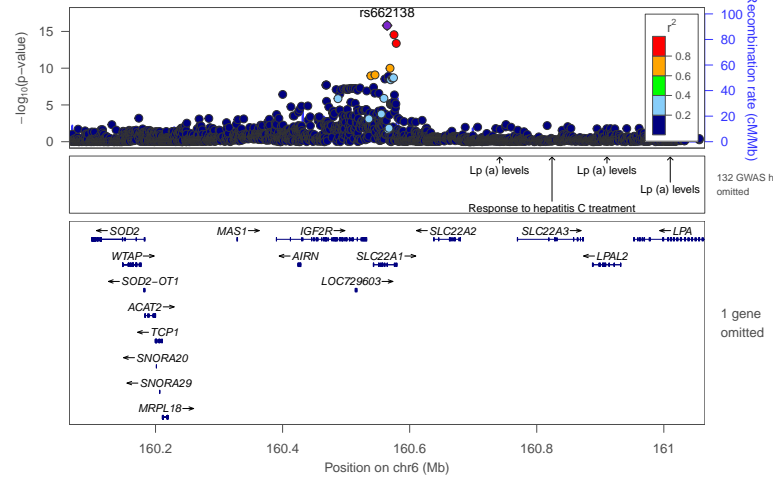

### N-acetyl-isoptureanine

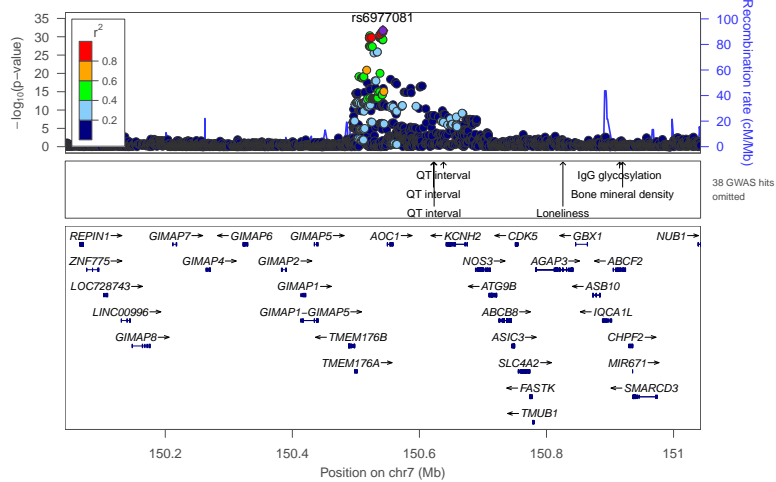

### N-acetyl-isoptureanine

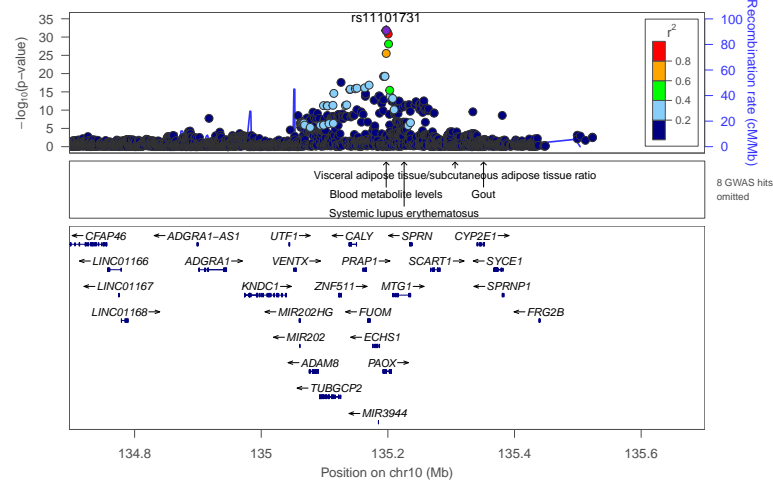

### X - 25244

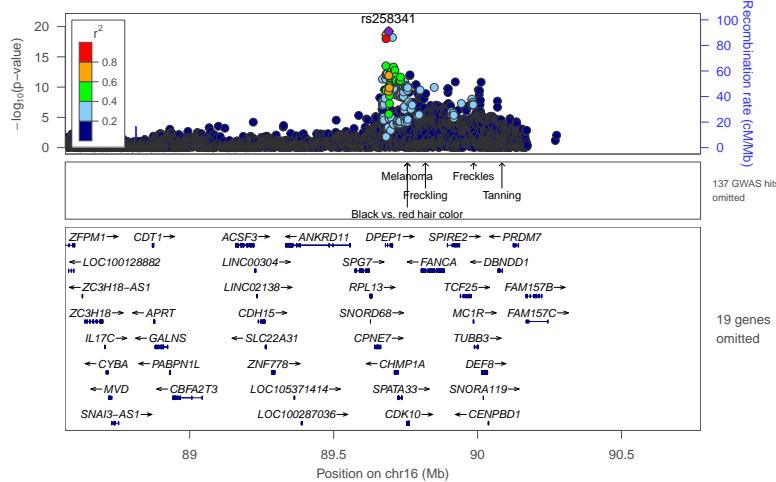

### 6-bromotryptophan

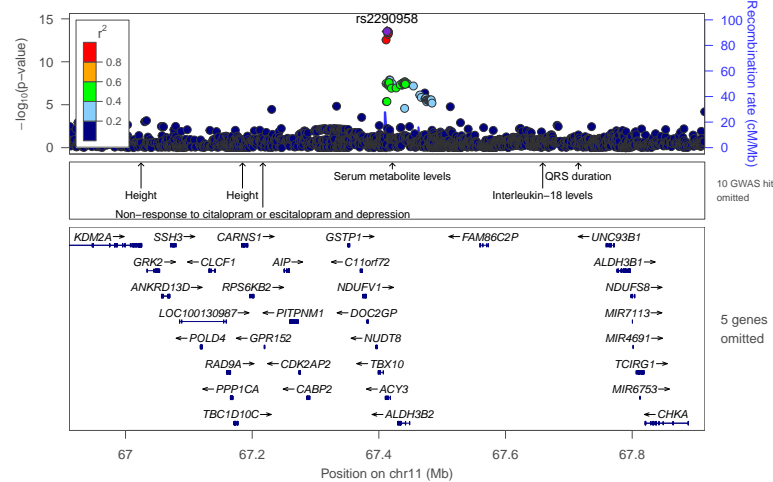

### 6-bromotryptophan

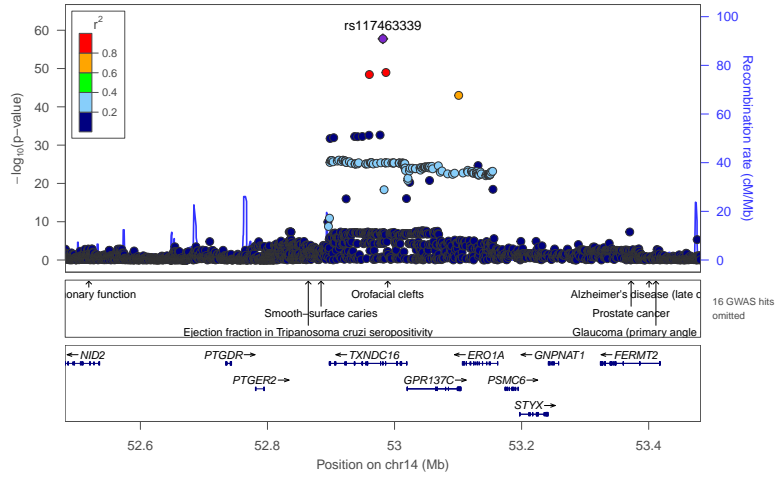

### 6-bromotryptophan

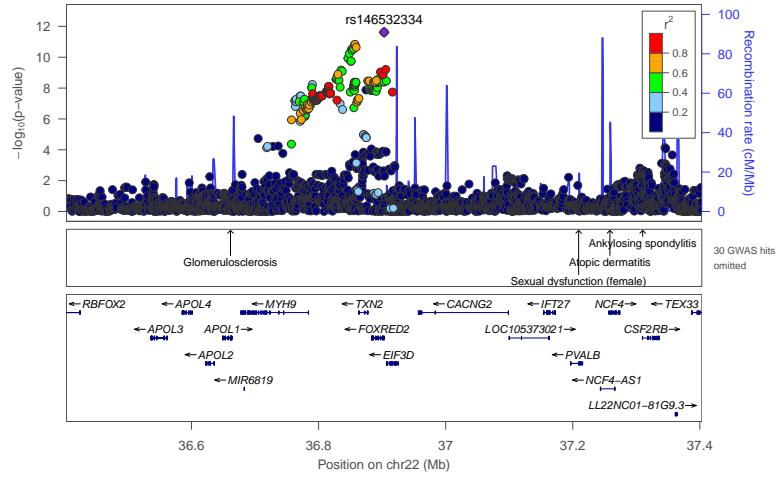

### X - 25279

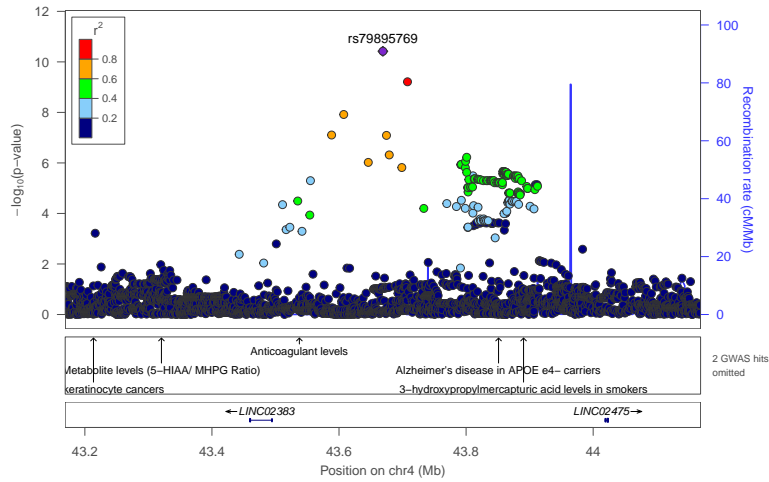

### lithocholate sulfate (1)

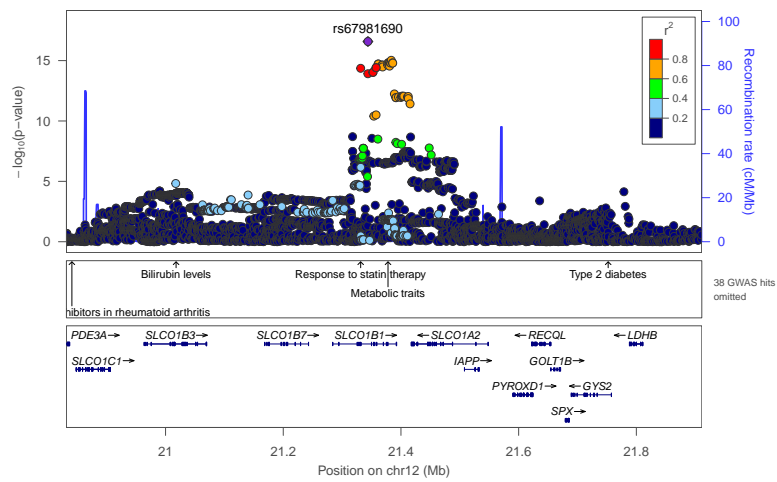

### cholic acid glucuronide

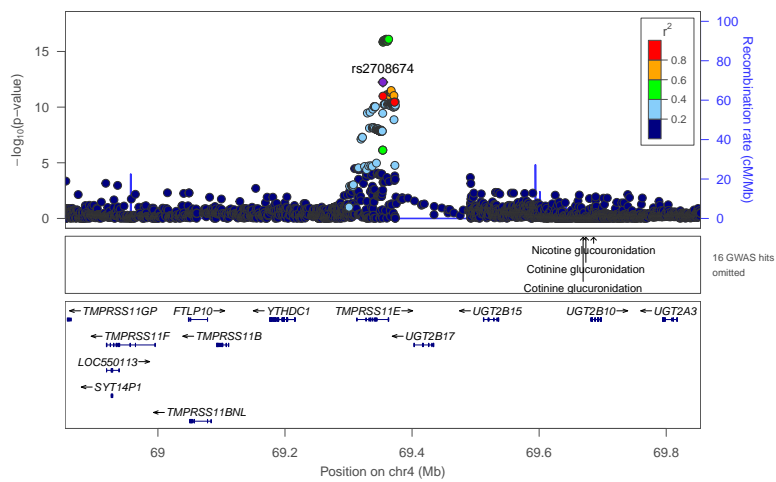

### X - 25371

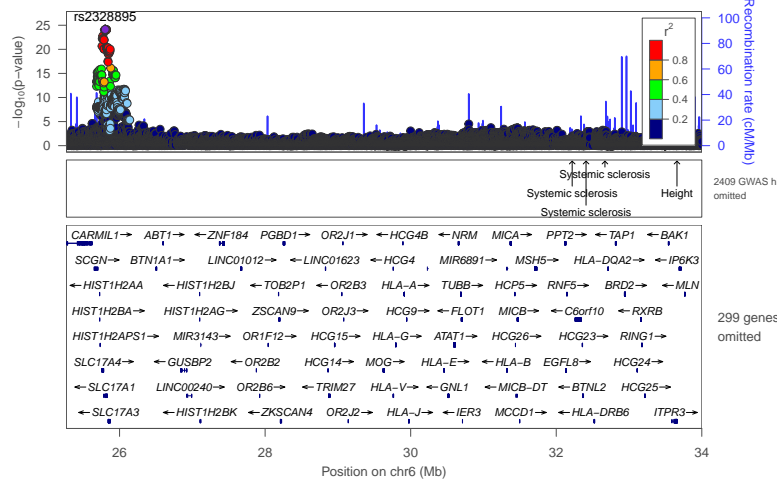



X - 25419

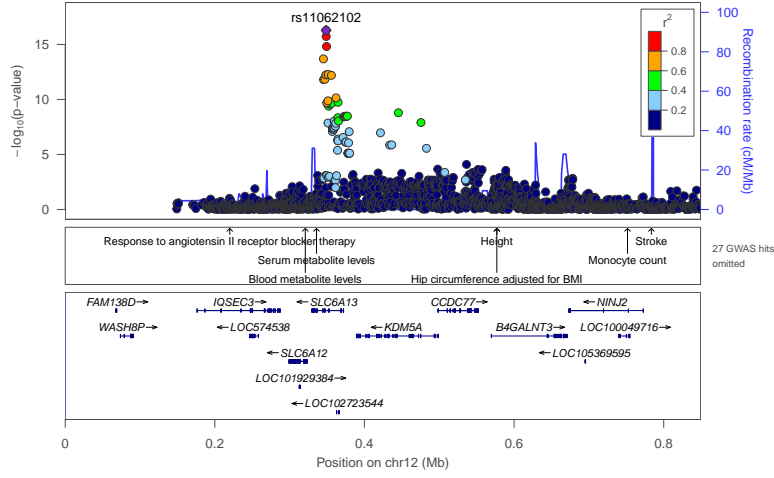

X - 25422

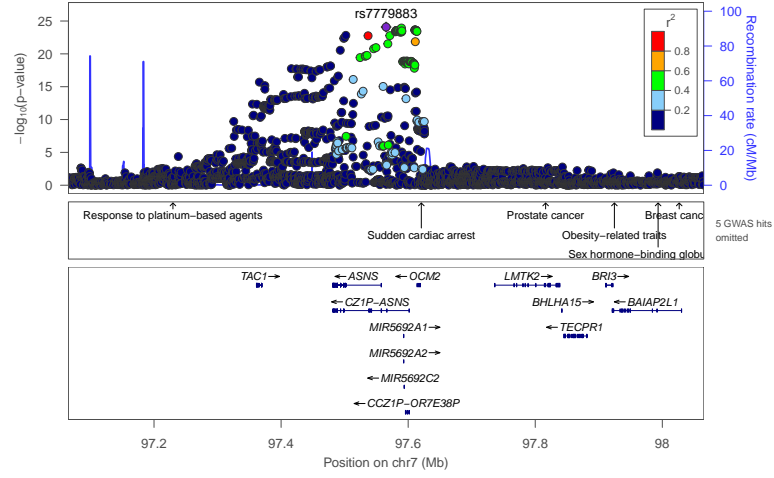

2,3-dihydroxy-5-methylthio-4-pentenoate (DMTPA)\*

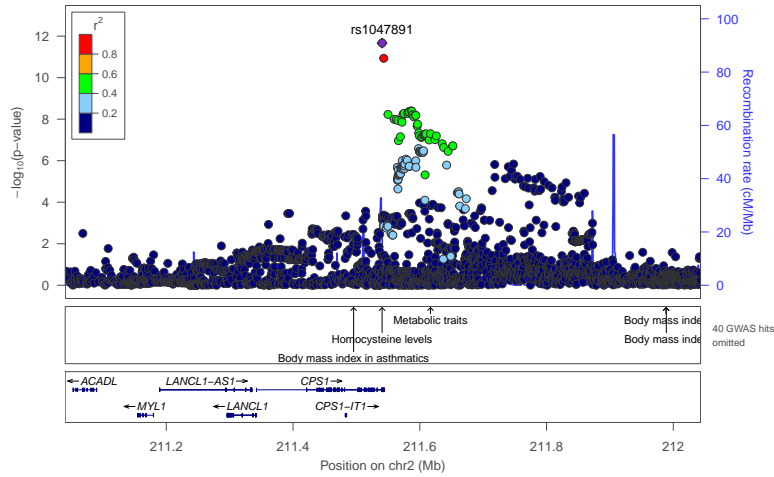

2,3-dihydroxy-5-methylthio-4-pentenoate (DMTPA)\*

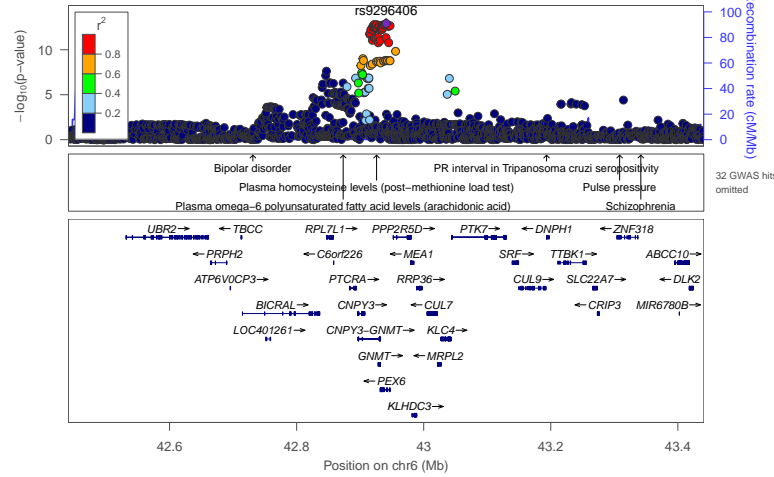

hydroxypalmitoyl sphingomyelin (d18:1/16:0(OH))\*\*

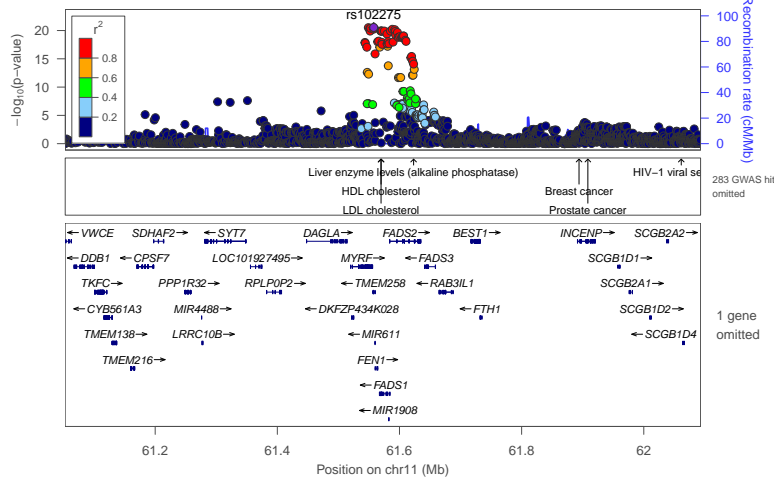

N6-methyllysine

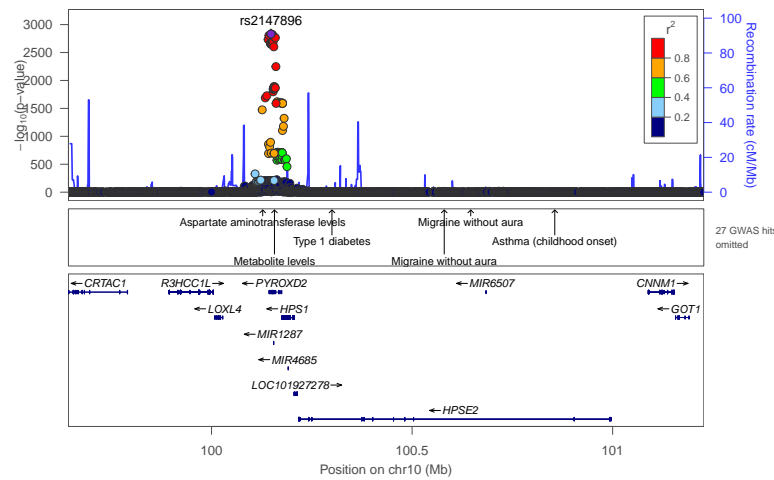



### N6,N6-dimethyllysine

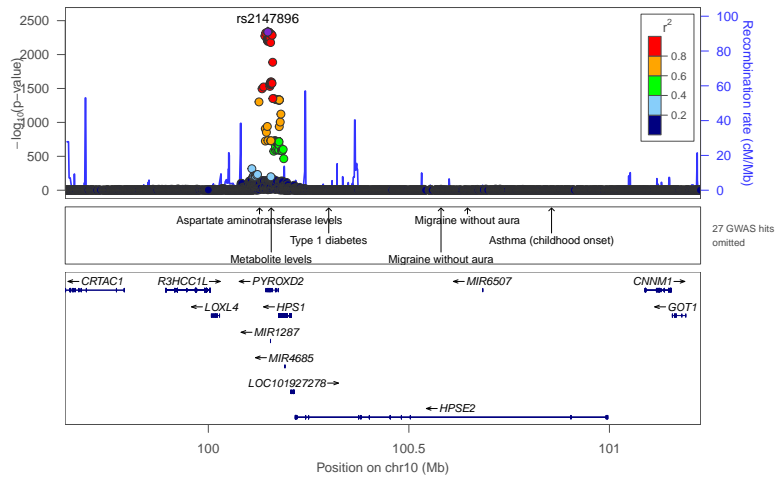

### 3-formylindole

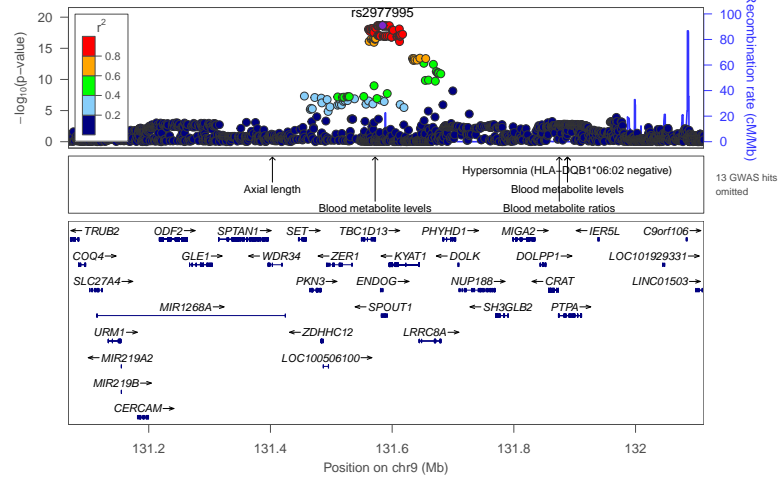

### 3-formylindole

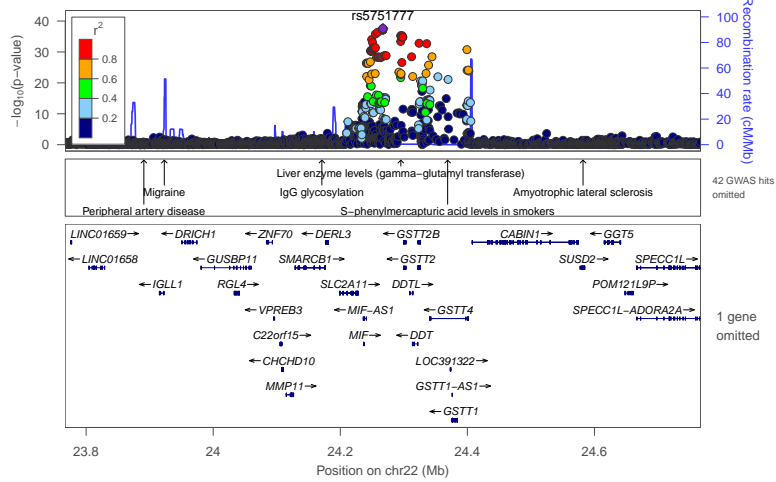

### mannonate\*

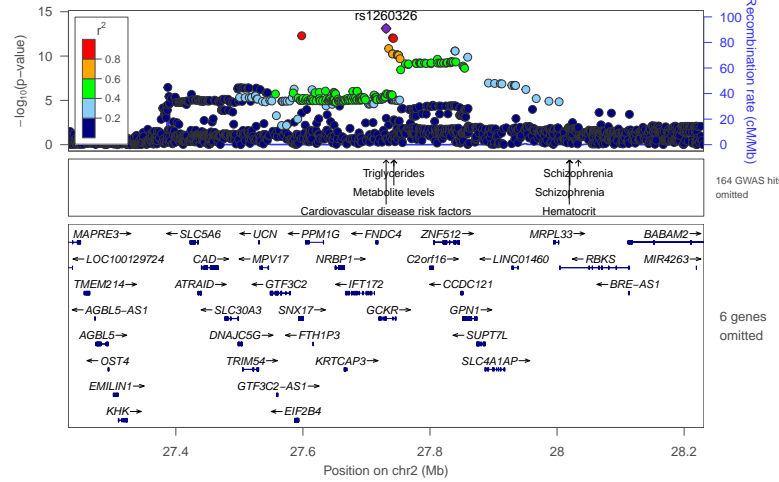

### cis-4-decenoate (10:1n6)\*

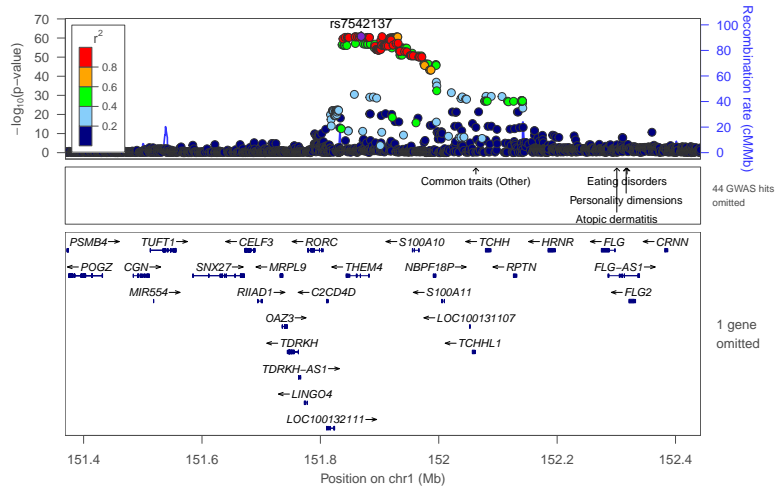

### cis-4-decenoate (10:1n6)\*

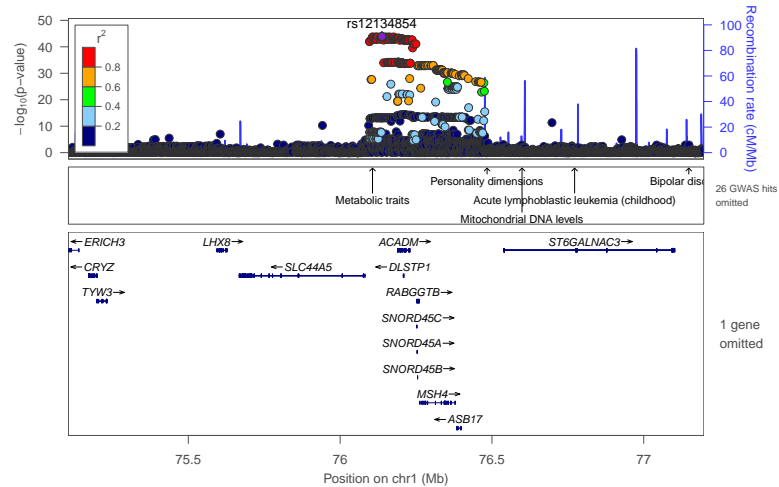

taurodeoxycholic acid 3-sulfate

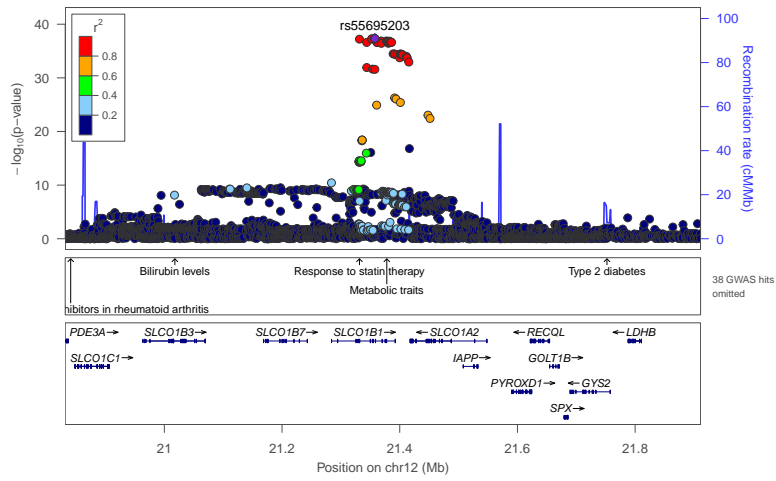

tetradecadienedioate (C14:2-DC)\*

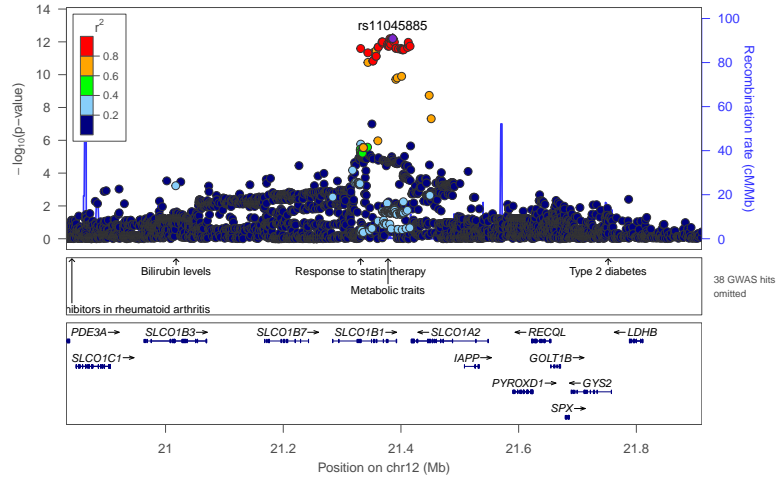

tetradecadienedioate (C14:2-DC)\*

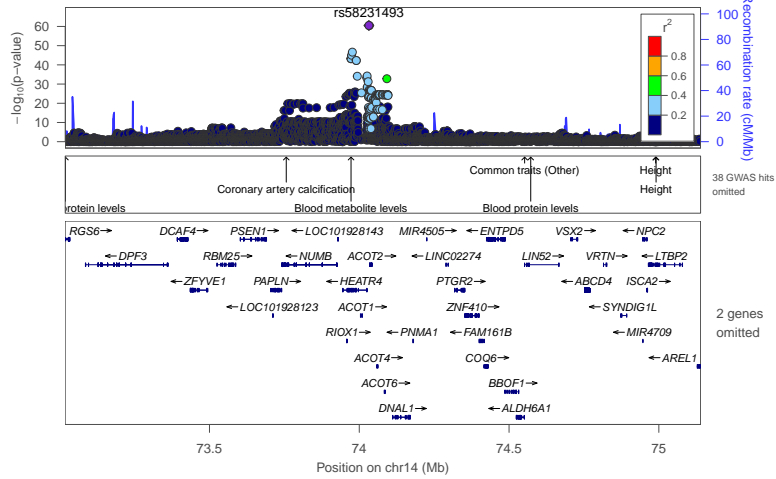

tridecenedioate (C13:1-DC)\*

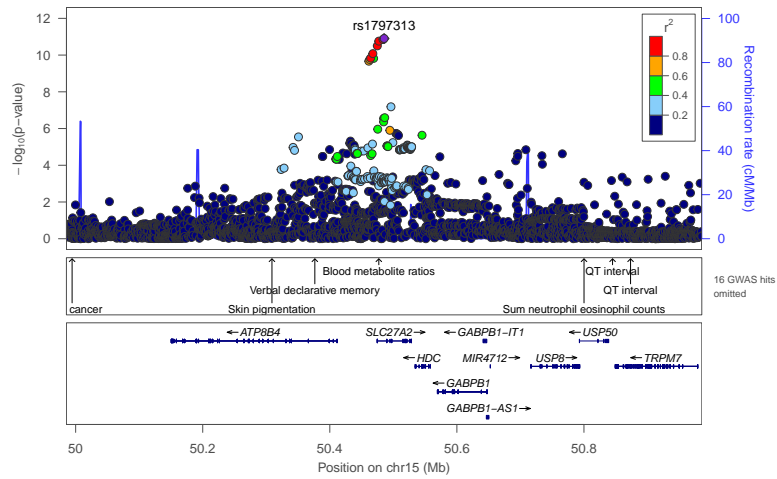

pregnenetriol disulfate\*

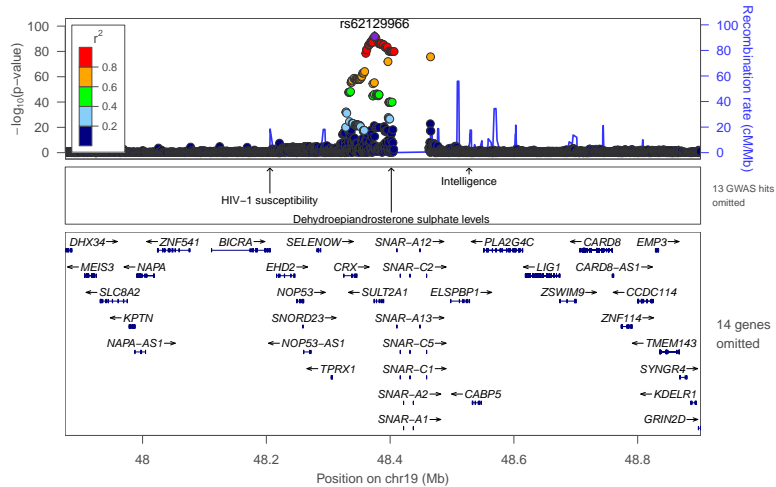

pregnenetriol sulfate\*

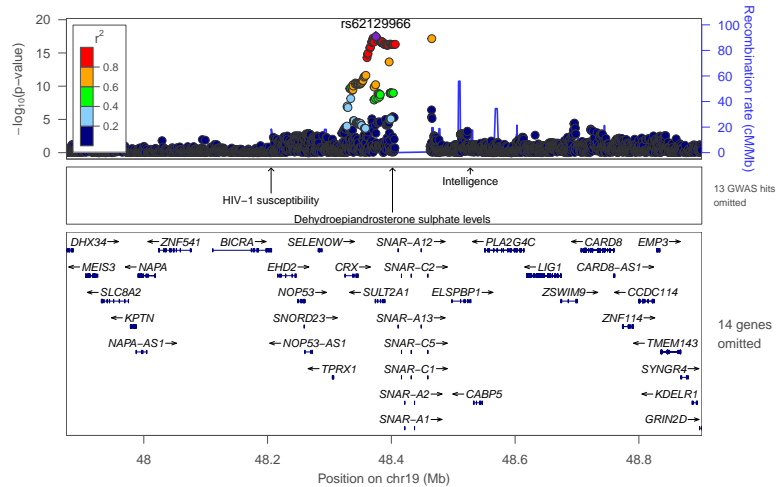

### eicosenedioate (C20:1-DC)\*

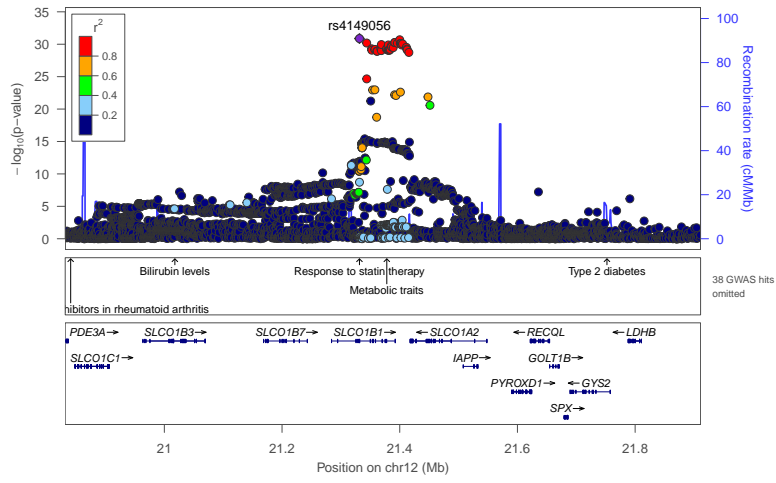

### N,N,N-trimethyl-alanylproline betaine (TMAP)

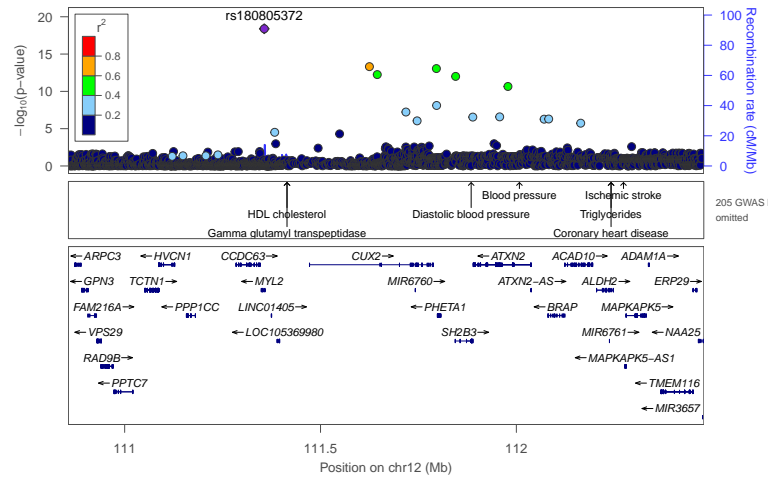

### 2S,3R-dihydroxybutyrate

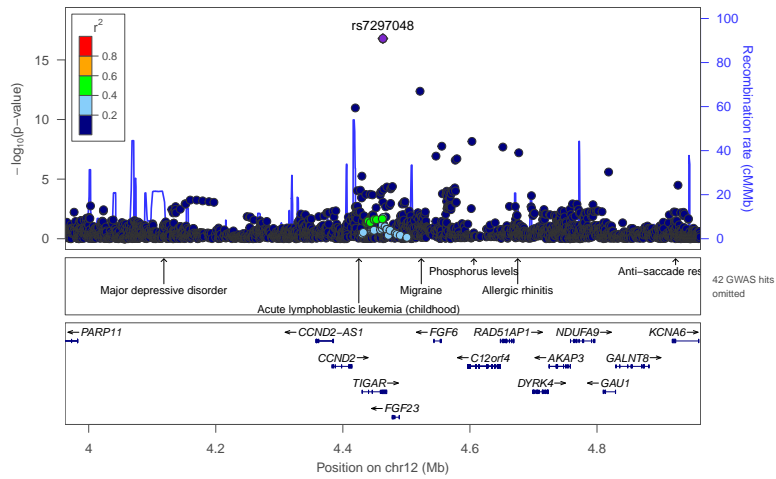

### 3,4-dihydroxybutyrate

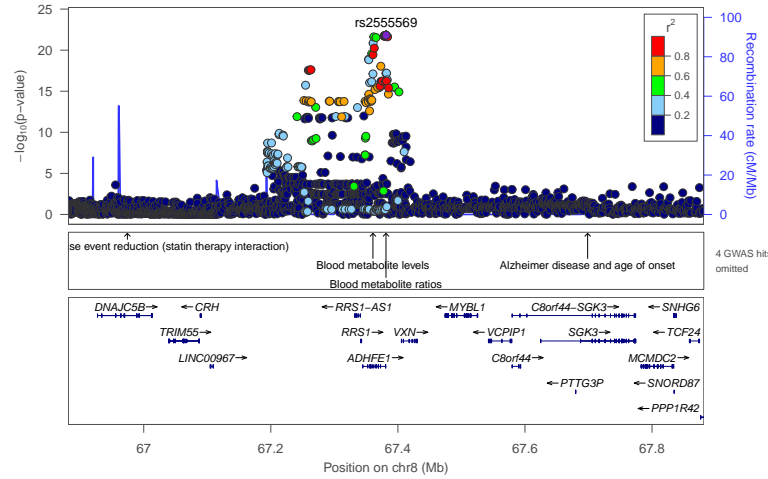

### N2-acetyl,N6-methyllysine

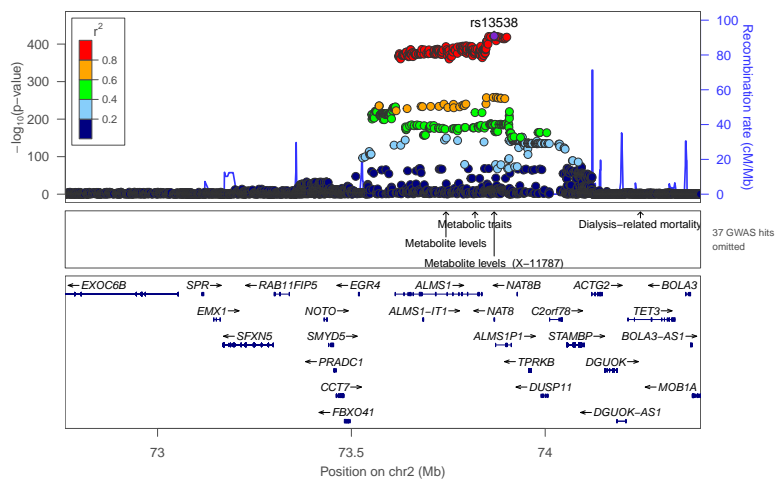

### N2-acetyl,N6-methyllysine

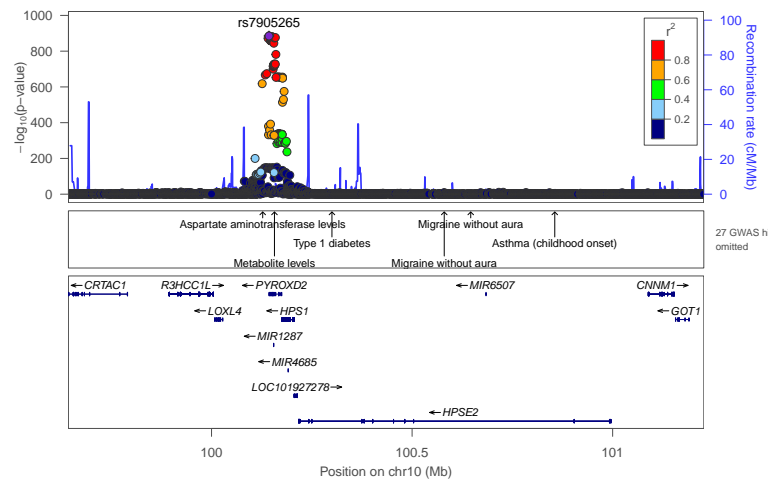

### 2,6-dihydroxybenzoic acid

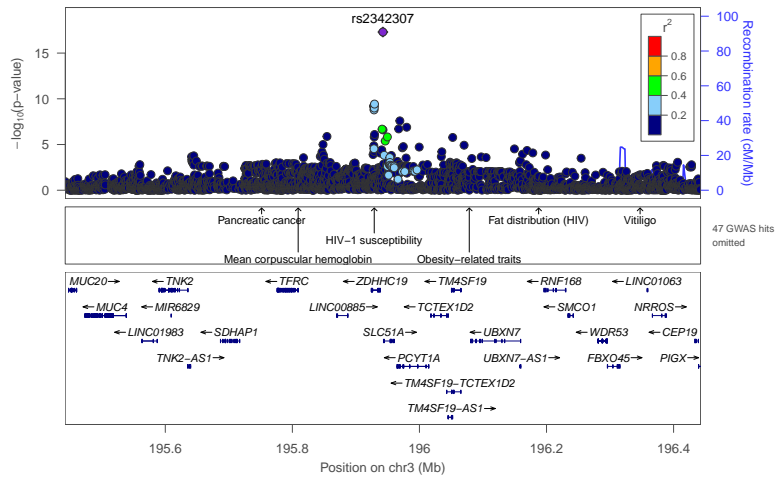

### picolinoylglycine

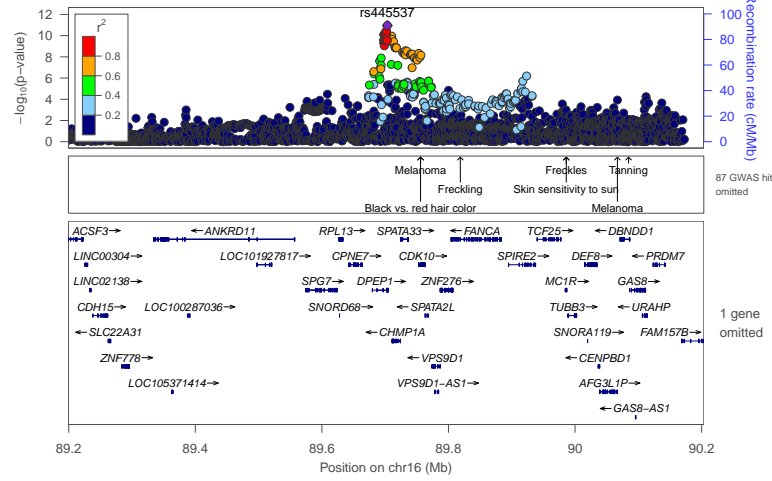

### 2R,3R-dihydroxybutyrate

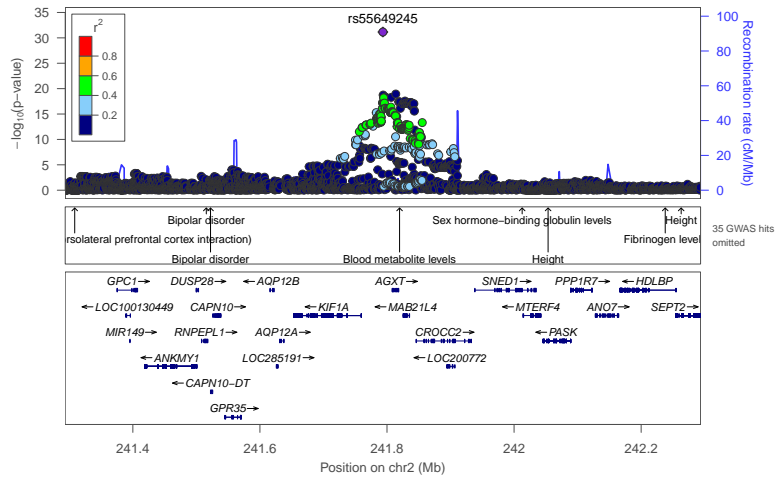

### 2-ketocaprylate

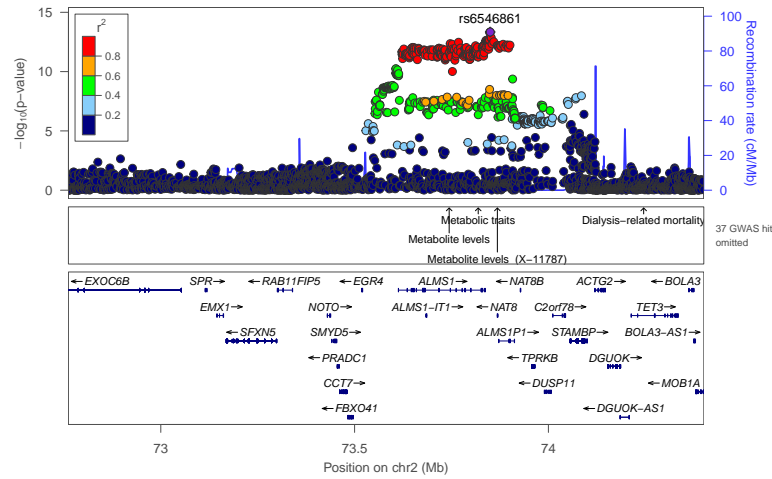

### metabolonic lactone sulfate

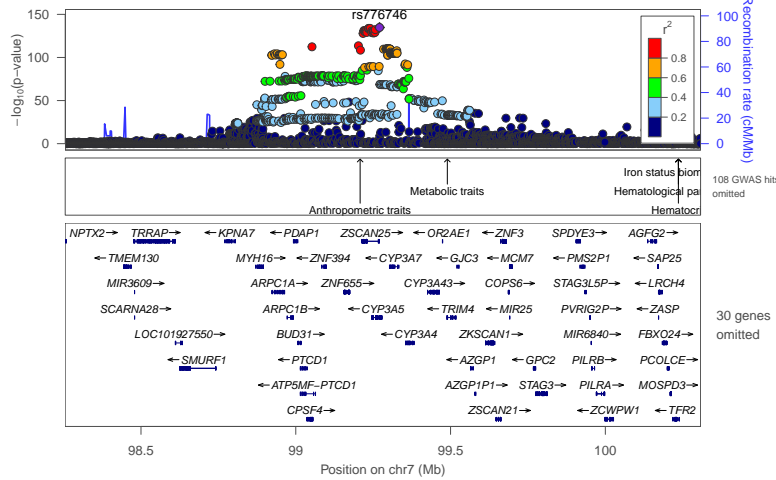

### metabolonic lactone sulfate

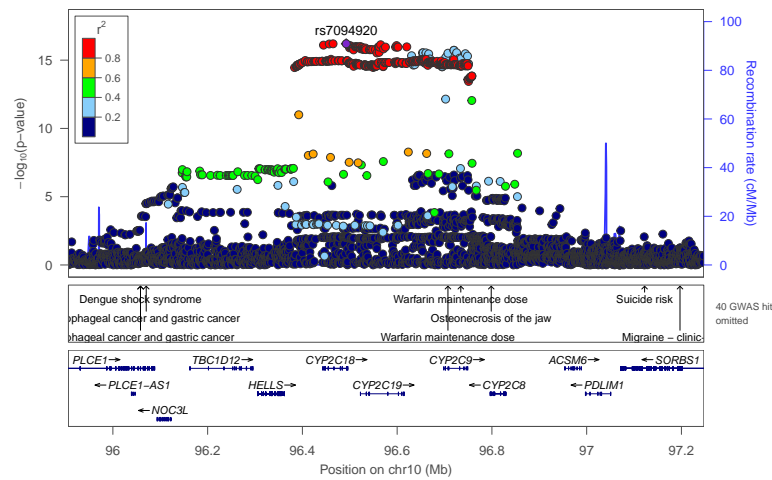

### metabolonic lactone sulfate

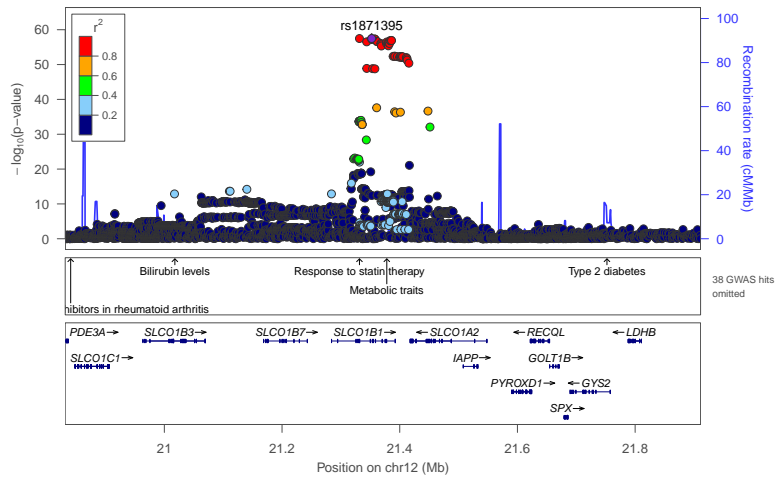

### 11beta-hydroxyandrosterone glucuronide

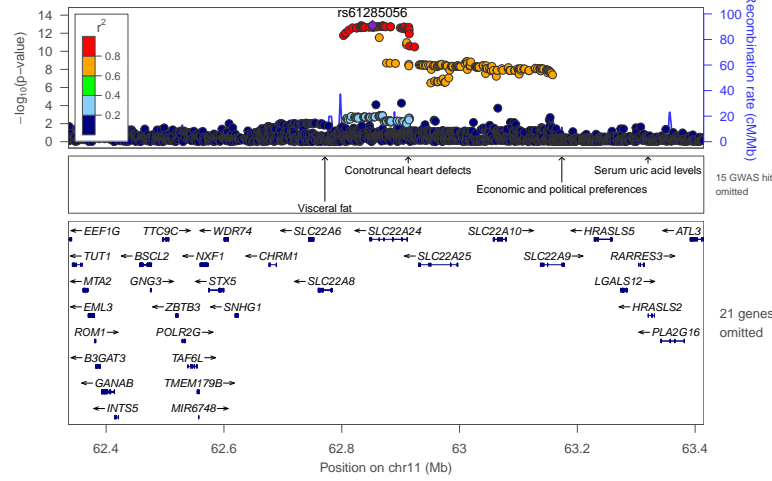

### N2-acetyl,N6,N6-dimethyllysine

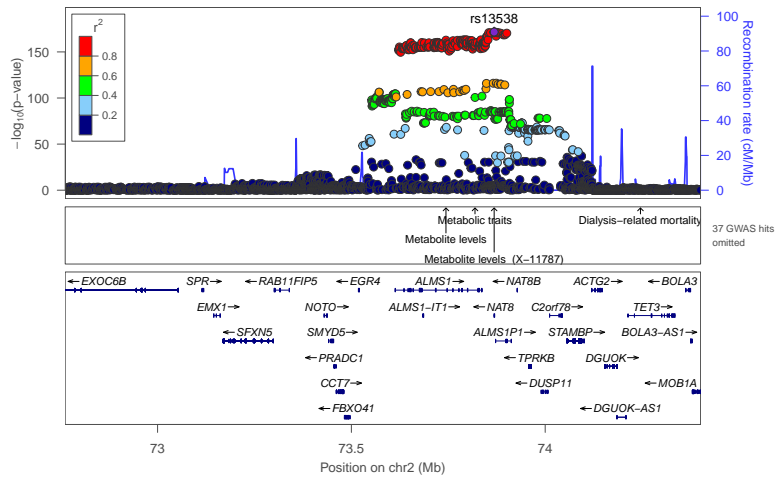

### N2-acetyl,N6,N6-dimethyllysine

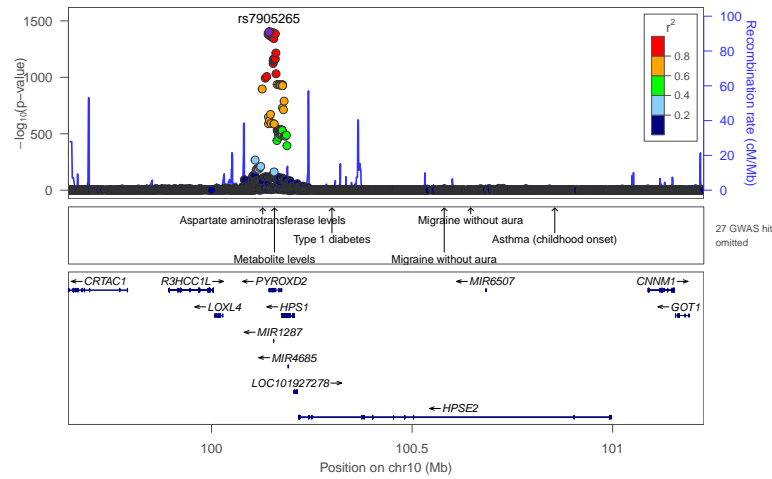

### 3-hydroxydecanoylcarnitine

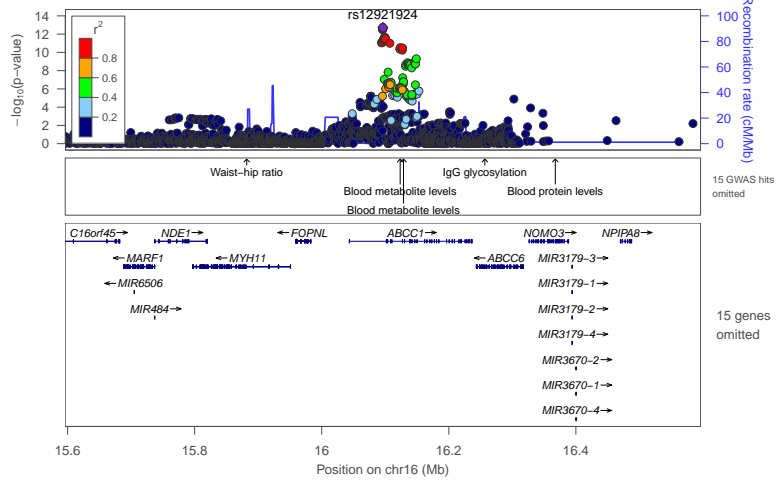

### levulinoylcarnitine

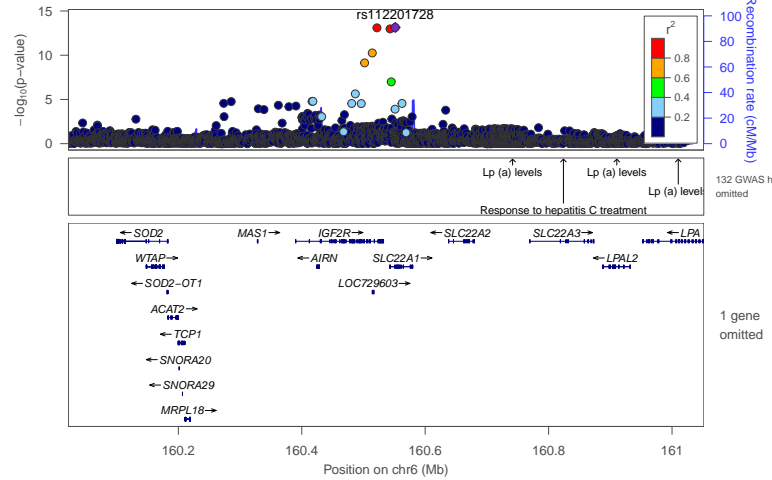

### 3-decenoylcarnitine

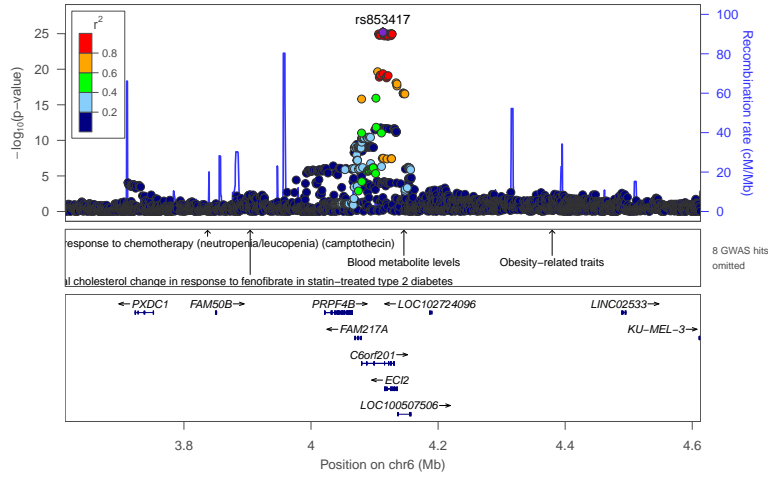

### feruloylquinic acid (1)

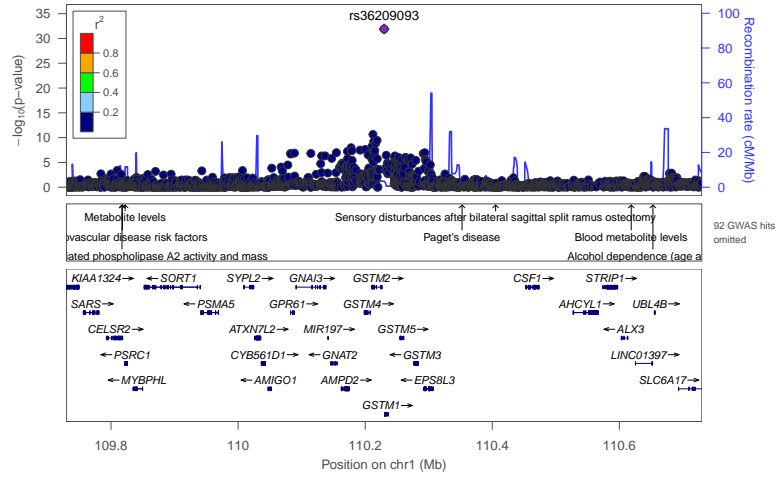

### feruloylquinic acid (2)

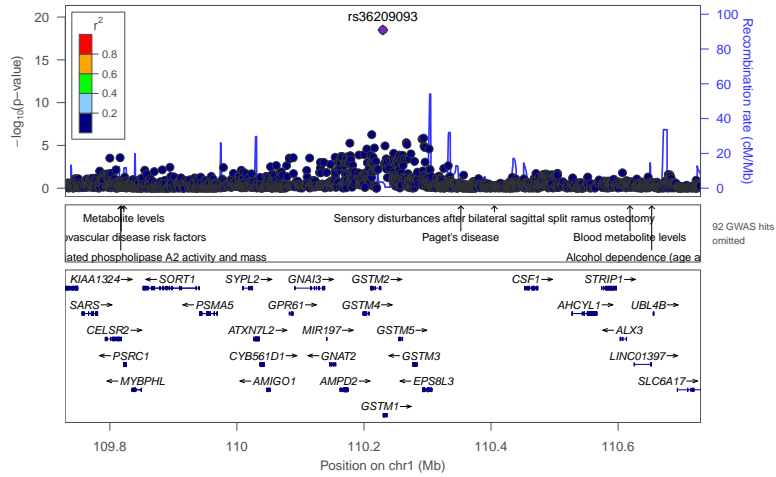

### feruloylquinic acid (4)

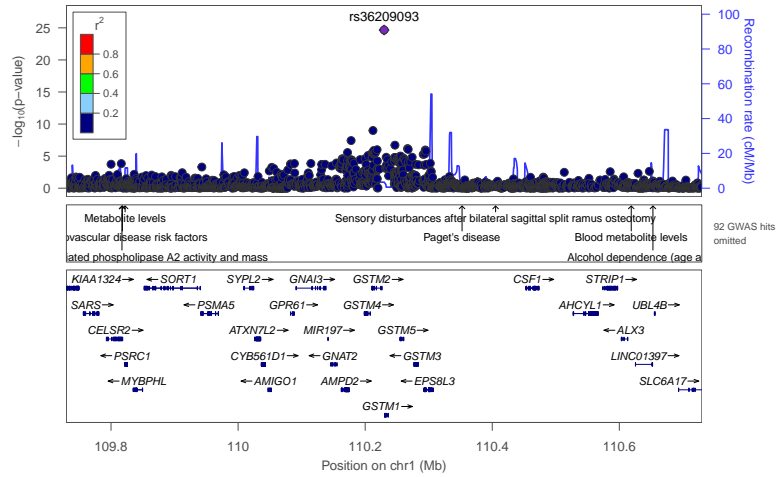

### feruloylquinic acid (5)

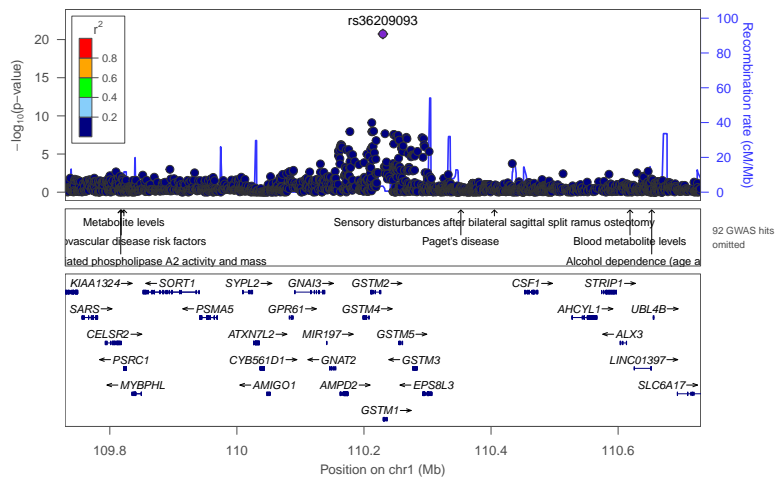

### 3-indoleglyoxylic acid

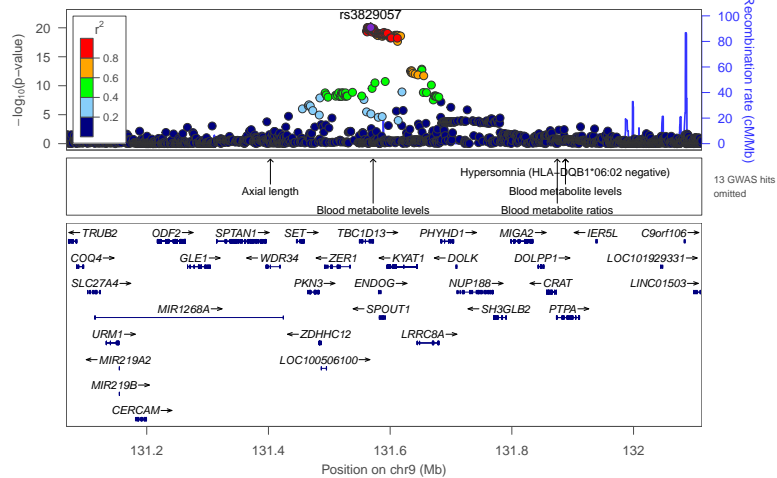



### 3-indoleglyoxylic acid

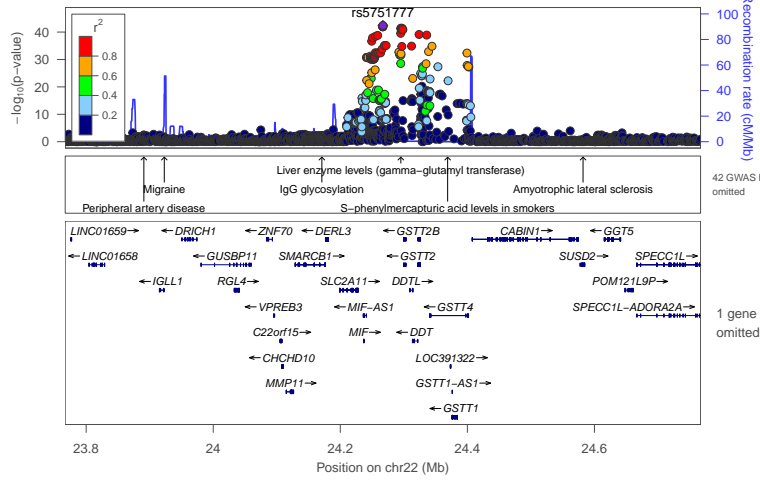

### 3,5-dichloro-2,6-dihydroxybenzoic acid

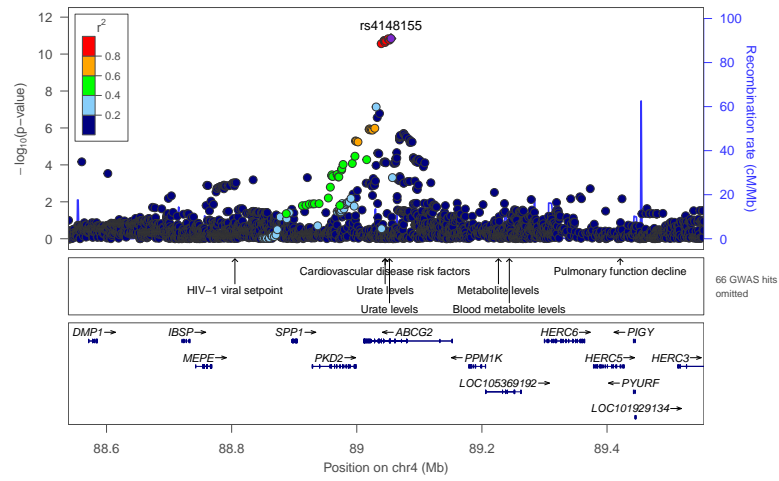

### ascorbic acid 2-sulfate

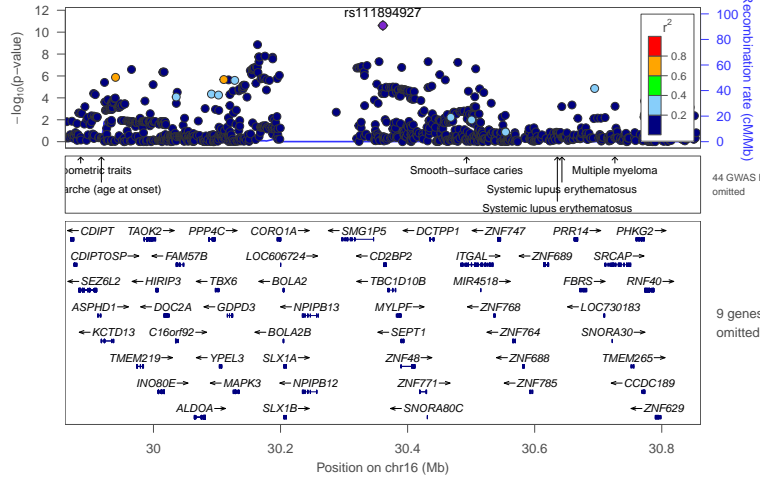

### deoxycholic acid glucuronide

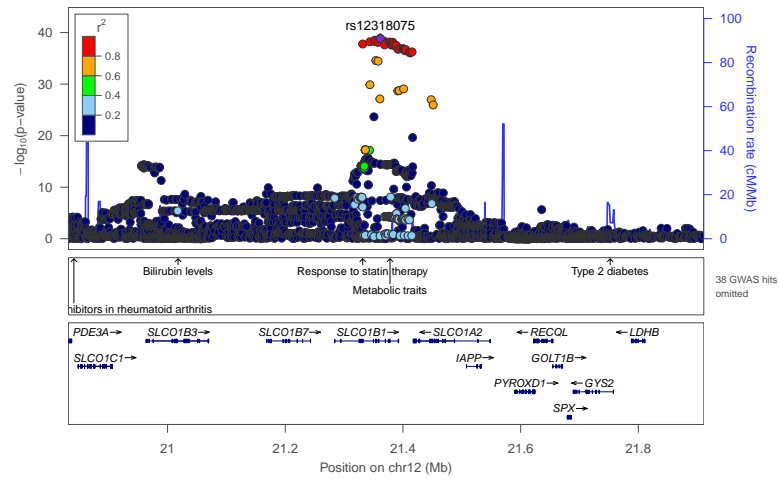

### undecenoylcarnitine (C11:1)

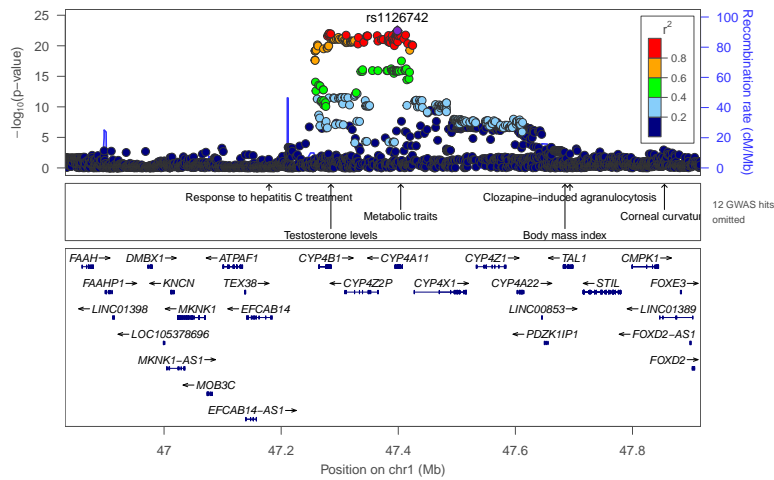

### undecenoylcarnitine (C11:1)

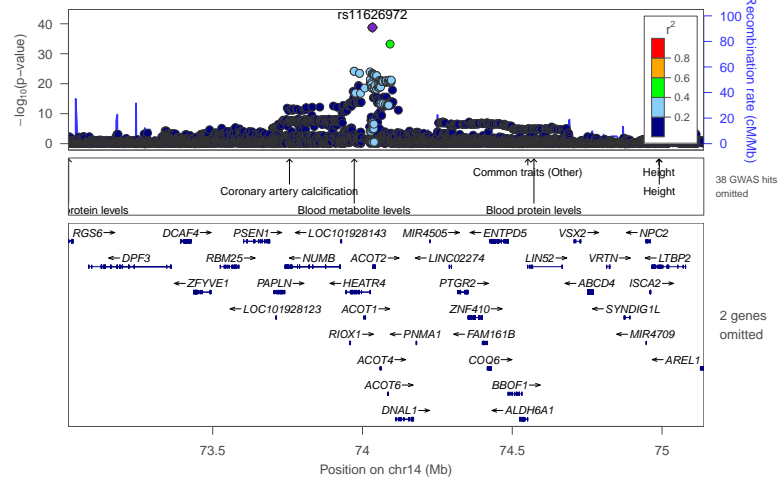

branched-chain, straight-chain, or cyclopropyl 10:1 fatty acid (2)\*

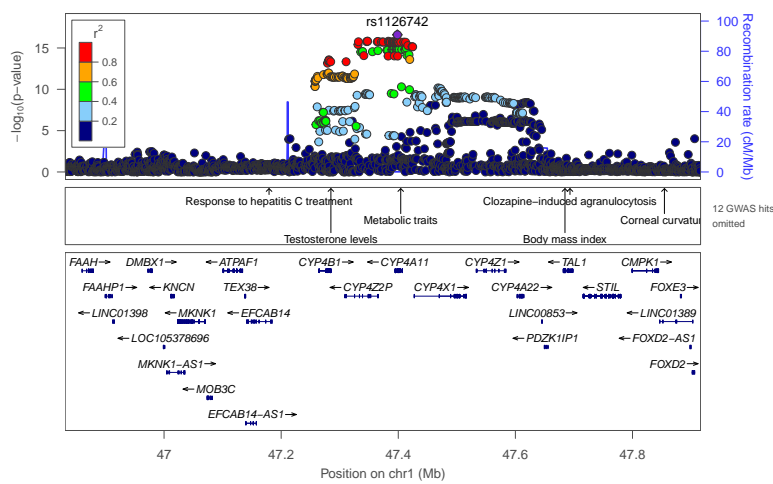

succinoyltaurine

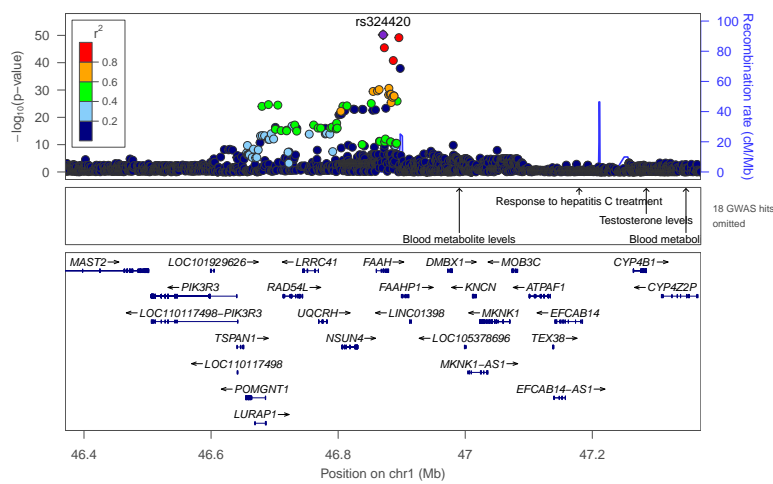

succinoyltaurine

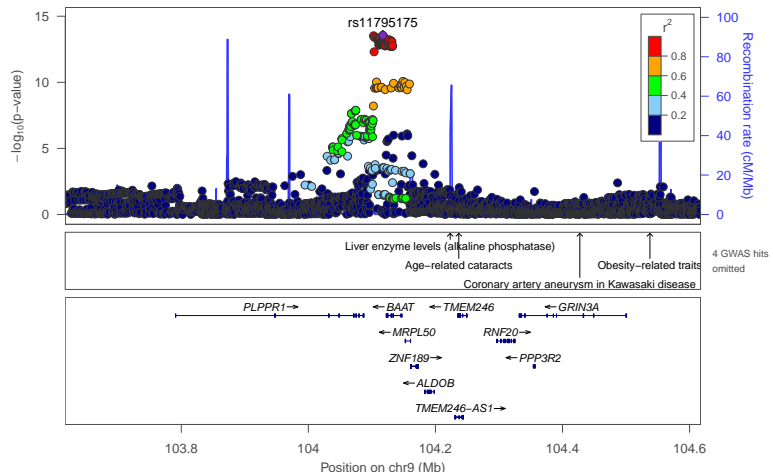

succinoyltaurine

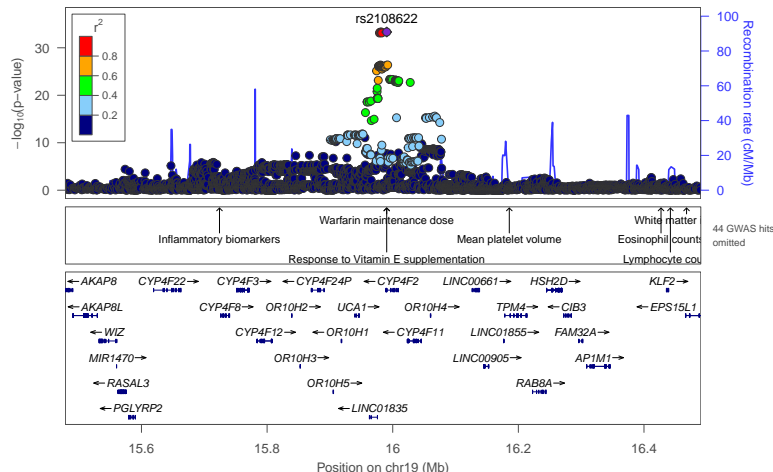

3-bromo-5-chloro-2,6-dihydroxybenzoic acid\*

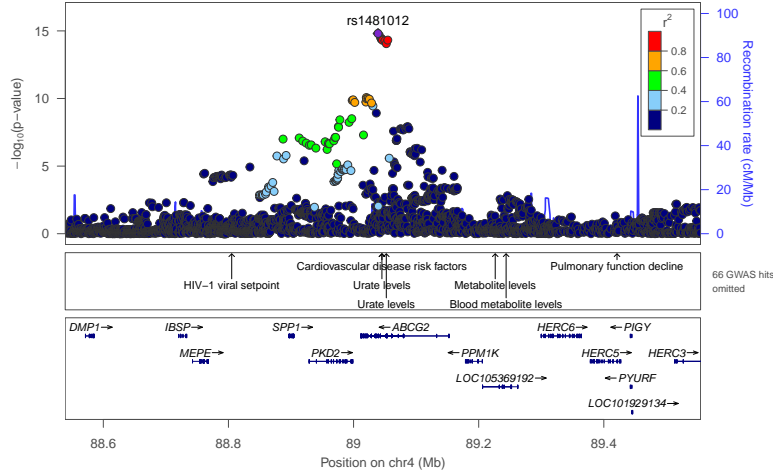

branched-chain, straight-chain, or cyclopropyl 12:1 fatty acid\*

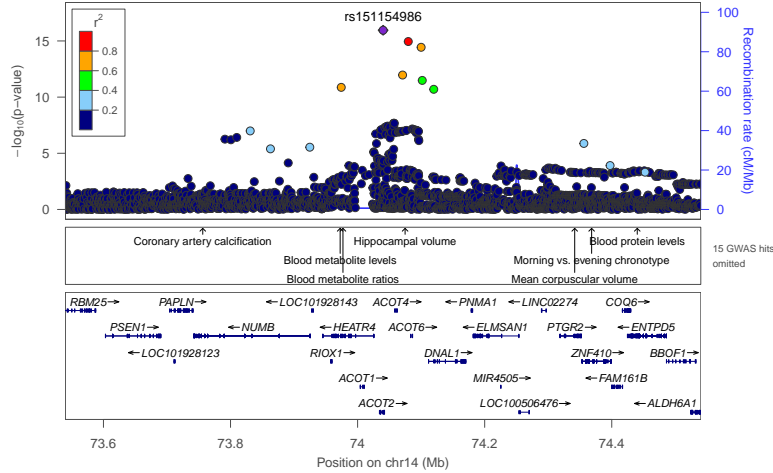

decadienedioic acid (C10:2-DC)\*\*

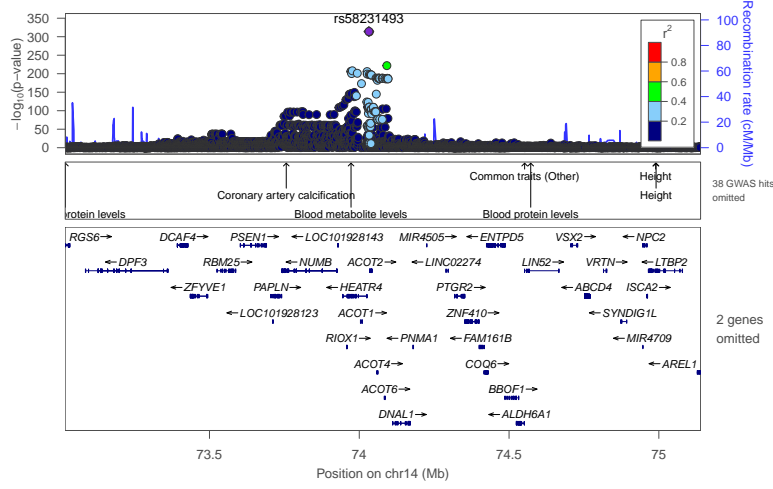

ascorbic acid 3-sulfate\*

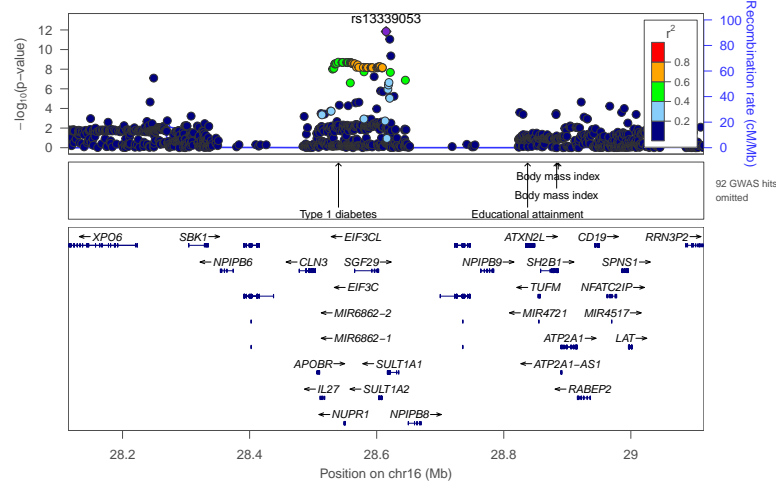

deoxycholic acid 12-sulfate\*

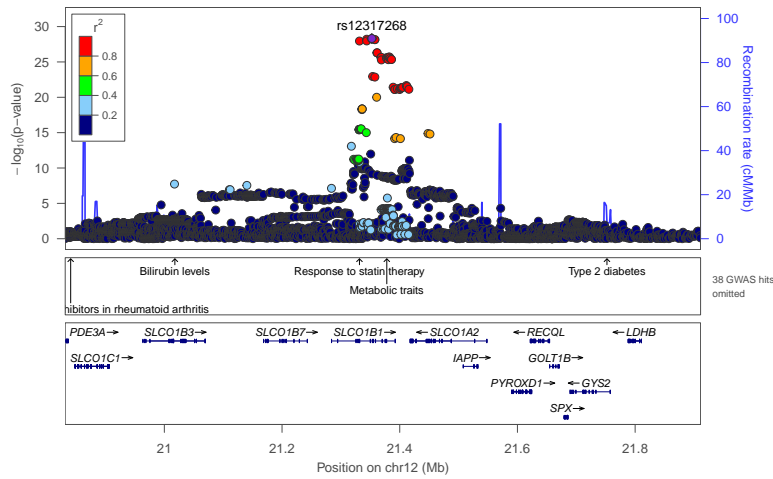

glycoursodeoxycholic acid sulfate (1)

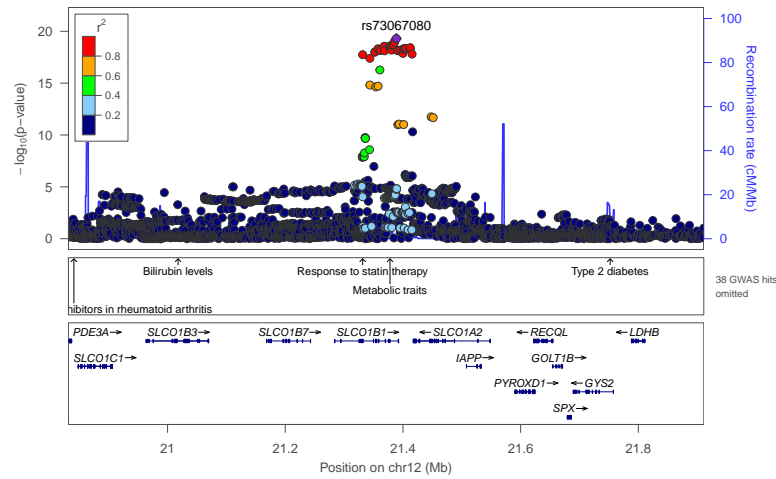

2-hydroxy-4-(methylthio)butanoic acid

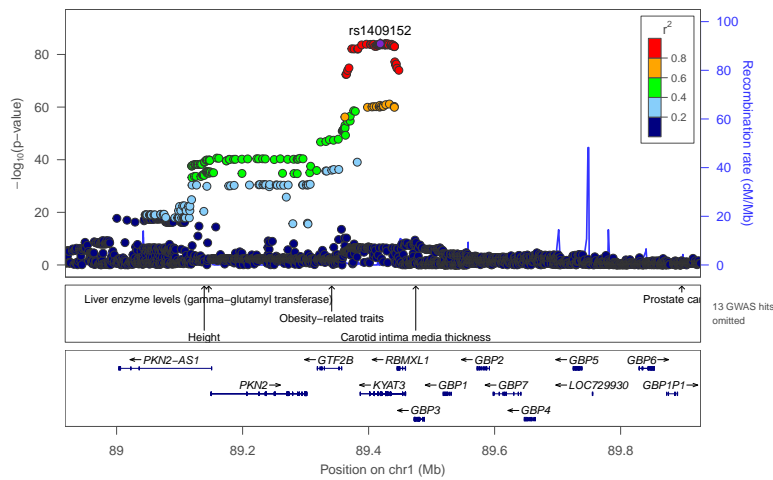

2-hydroxy-4-(methylthio)butanoic acid

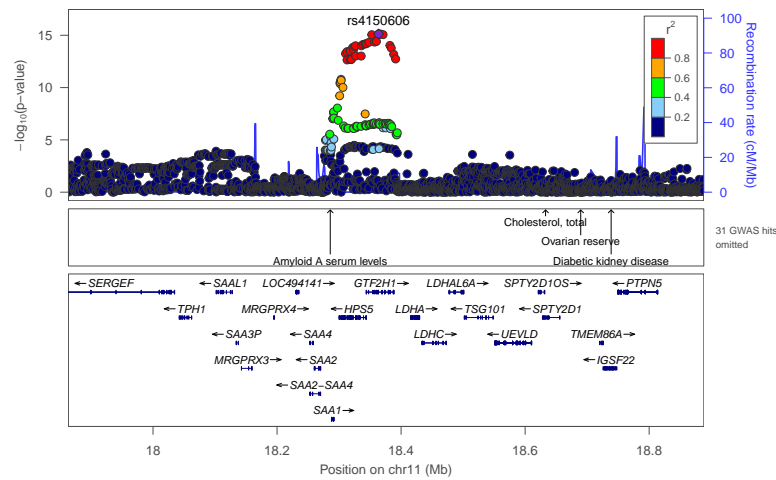

X - 25982

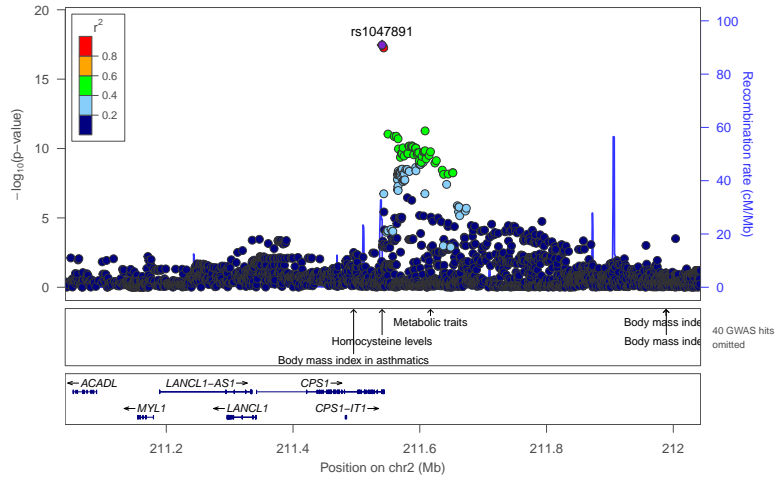

X - 25982

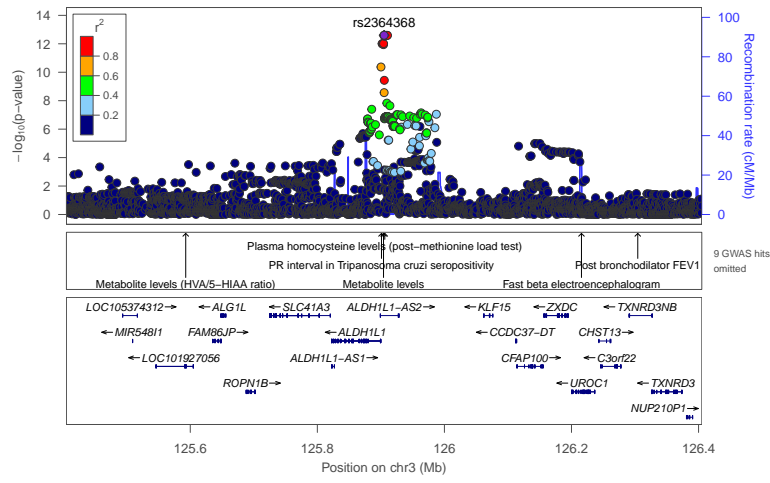

2-O-methylascorbic acid

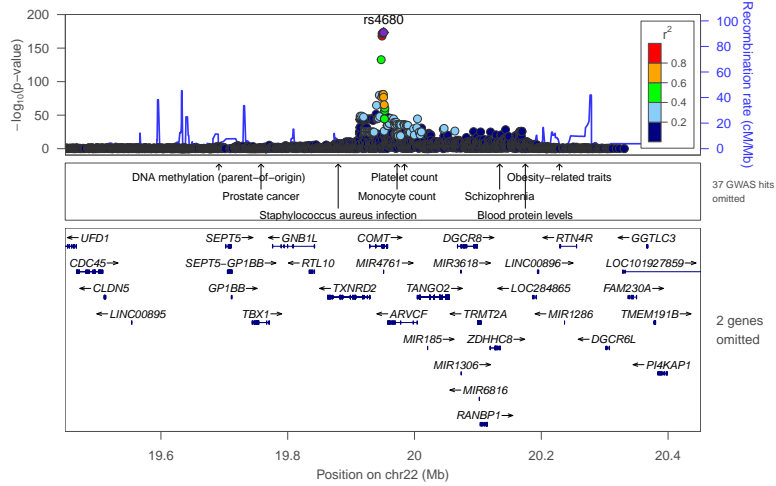

ethyl beta-glucopyranoside

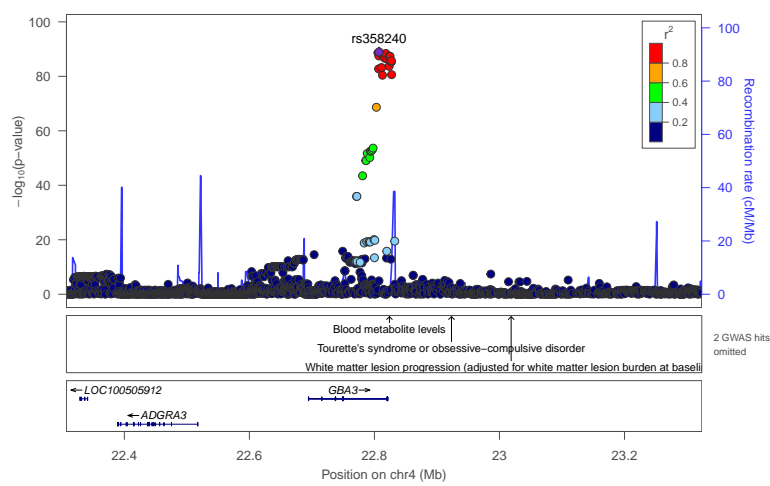

S-carboxyethylcysteine

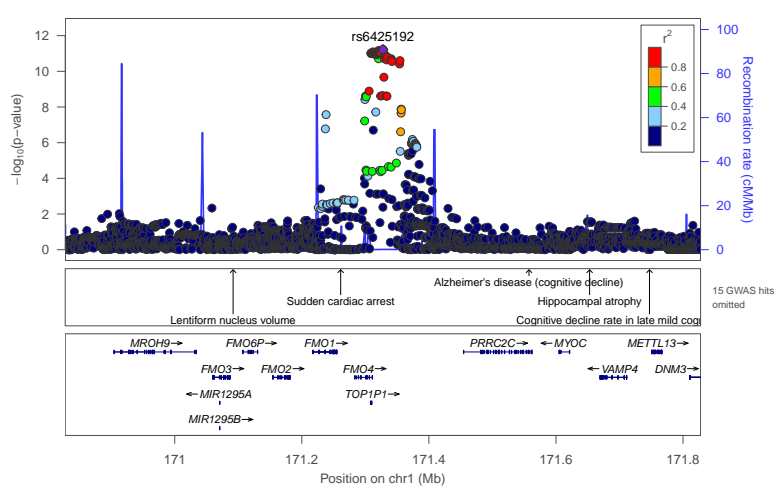

X - 26054

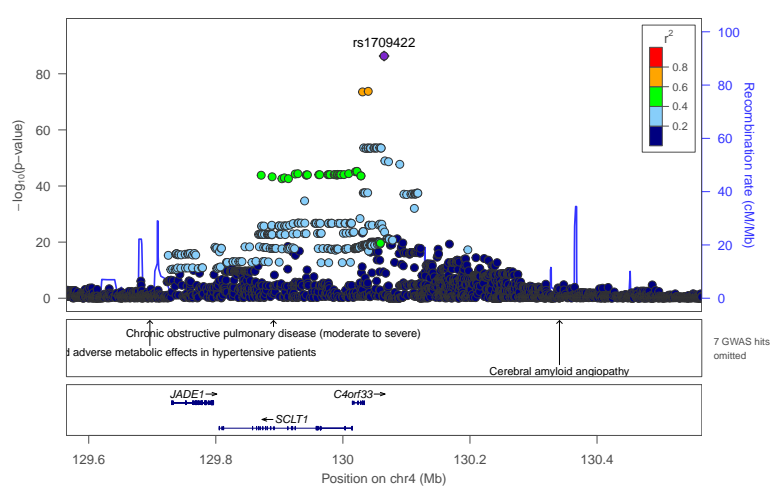

X - 26054

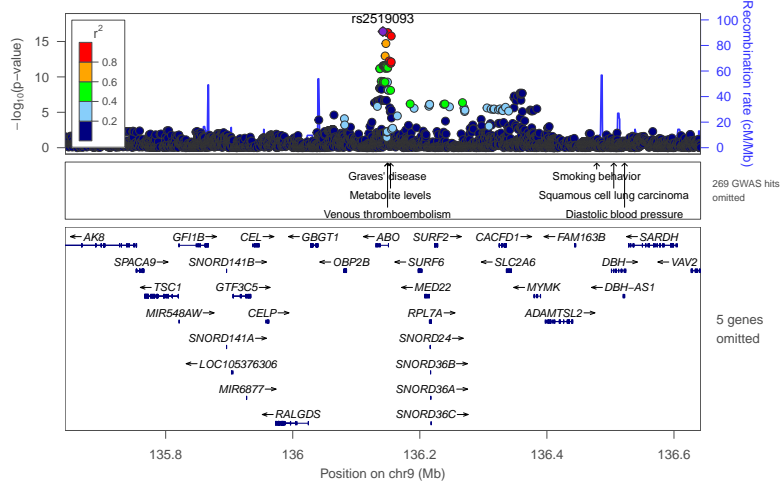

cis-3,4-methyleneheptanoylglycine

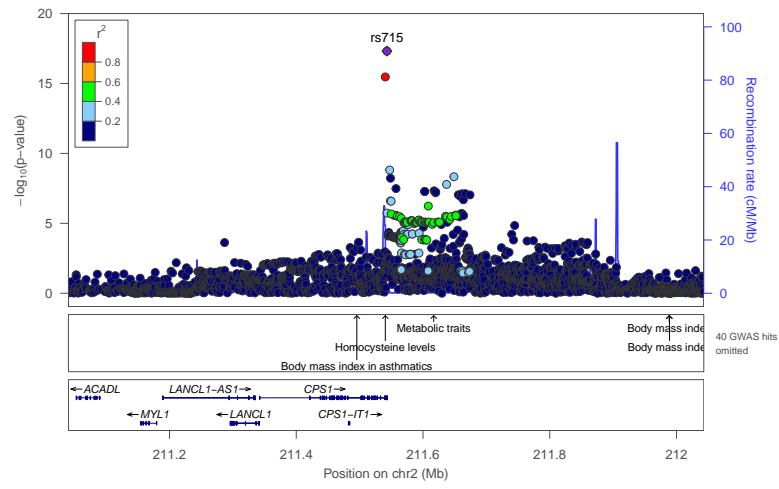

3-hydroxyoctanoylcarnitine (1)

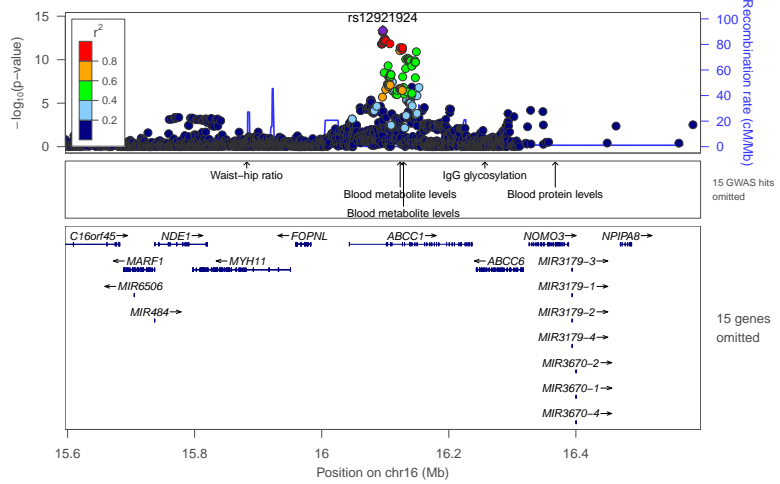

3-hydroxyoctanoylcarnitine (2)

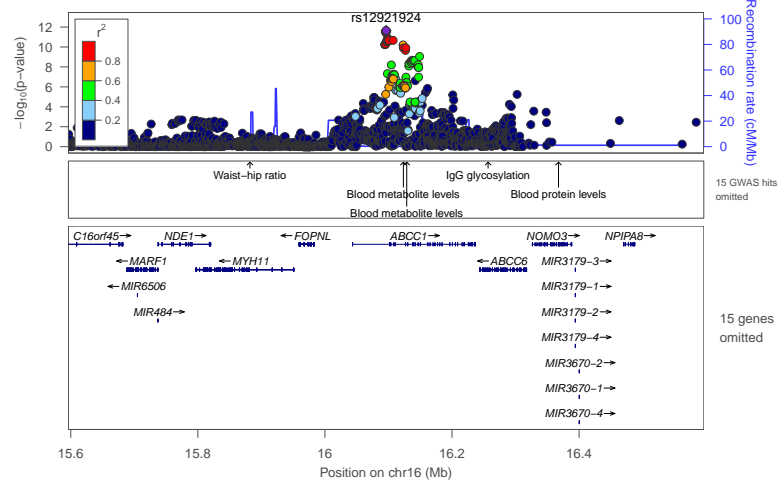

X - 26109

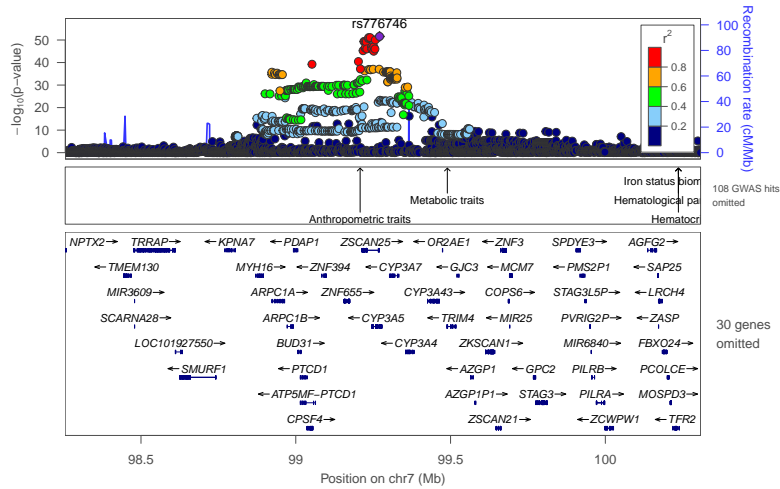

X - 26109

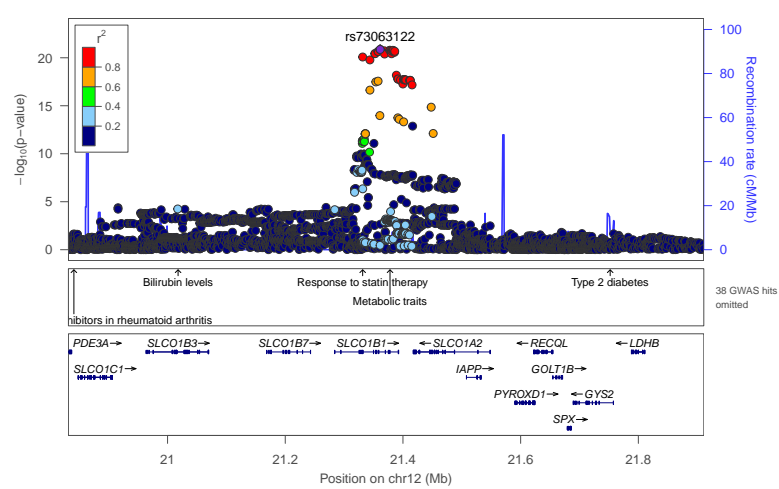

X - 26111

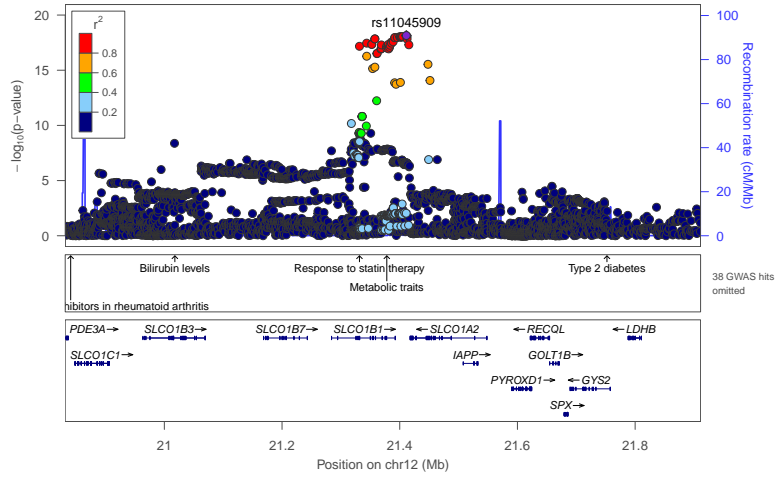

bilirubin degradation product, C16H18N2O5 (1)\*\*

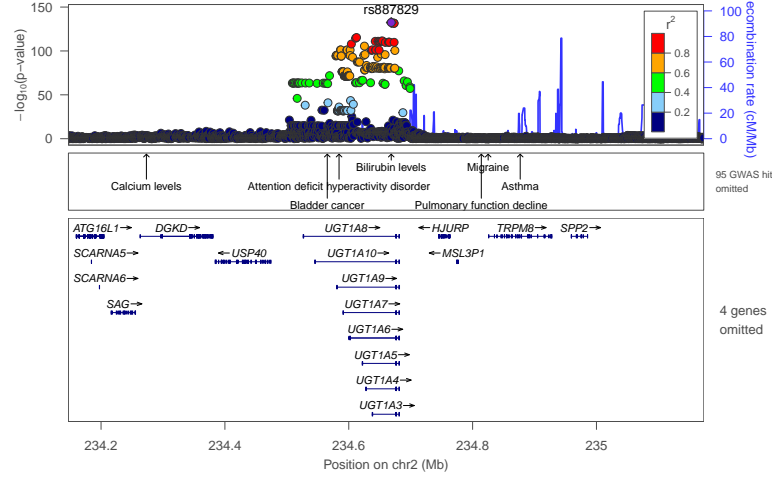

bilirubin degradation product, C16H18N2O5 (2)\*\*

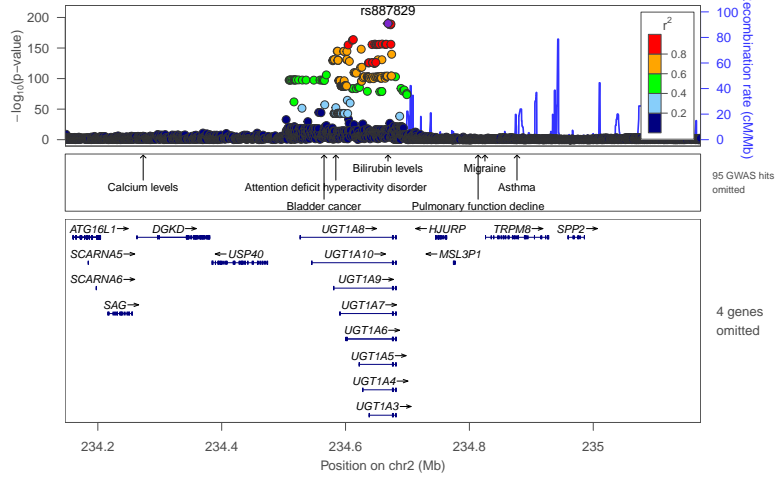

bilirubin degradation product, C17H20N2O5 (1)\*\*

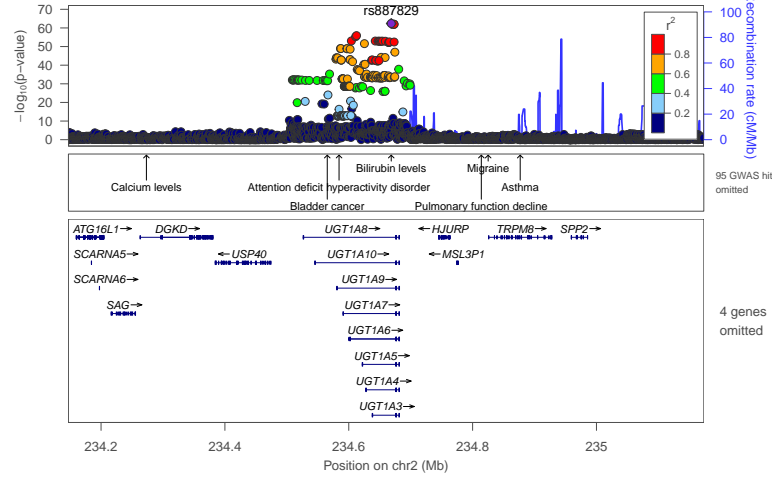

bilirubin degradation product, C17H20N2O5 (2)\*\*

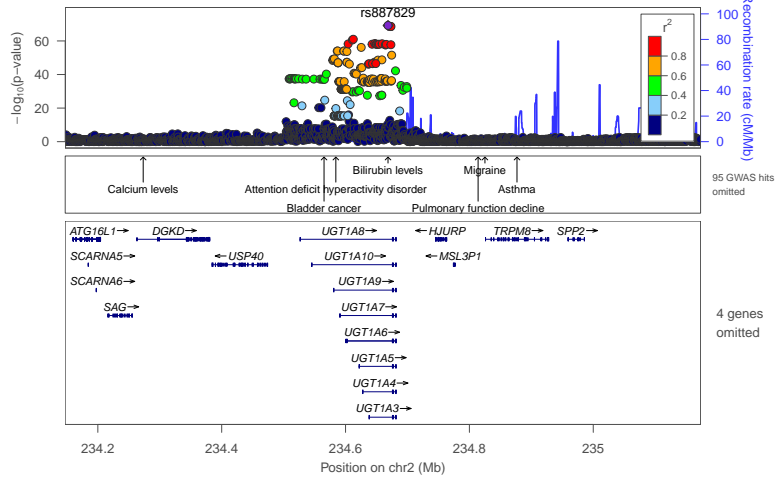

bilirubin degradation product, C17H18N2O4 (2)\*\*

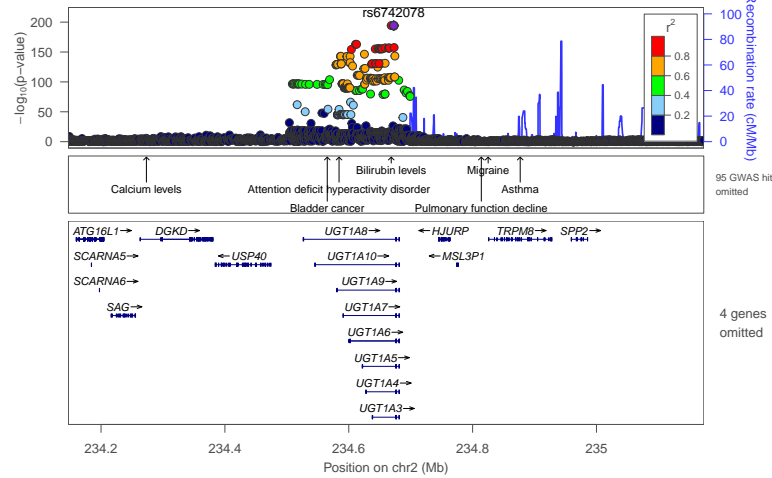



bilirubin degradation product, C<sub>17</sub>H<sub>18</sub>N<sub>2</sub>O<sub>4</sub> (3)\*\*

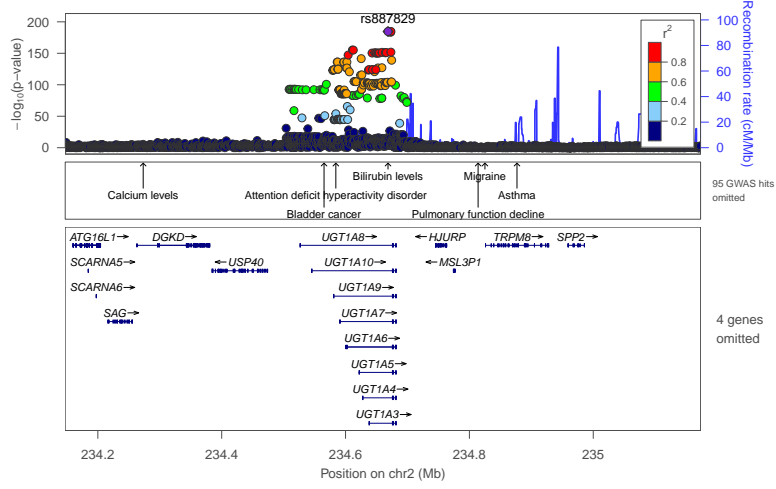

bilirubin degradation product, C<sub>17</sub>H<sub>18</sub>N<sub>2</sub>O<sub>4</sub> (1)\*\*

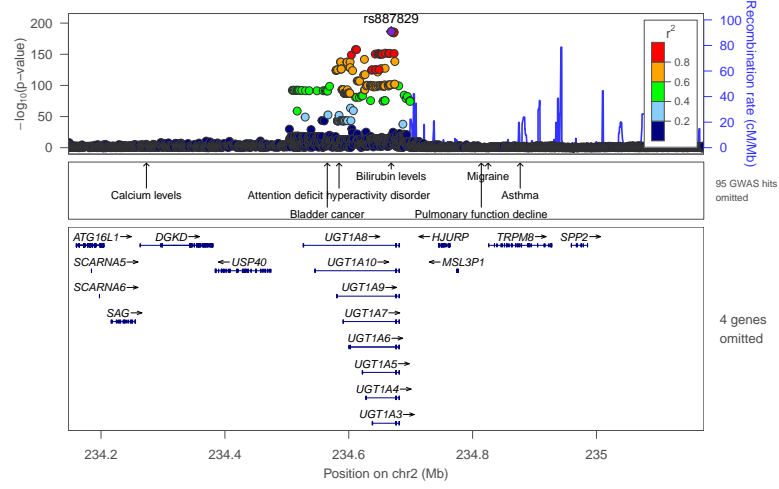

tetrahydrocortisol glucuronide

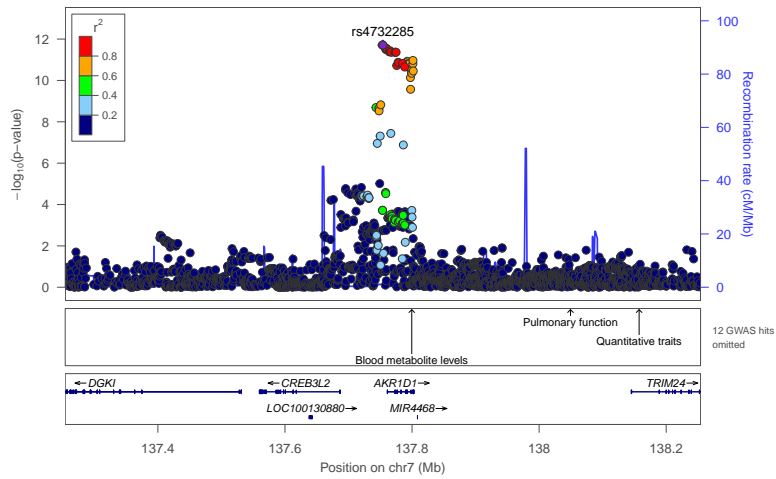

bilirubin degradation product, C<sub>16</sub>H<sub>18</sub>N<sub>2</sub>O<sub>5</sub> (4)\*\*

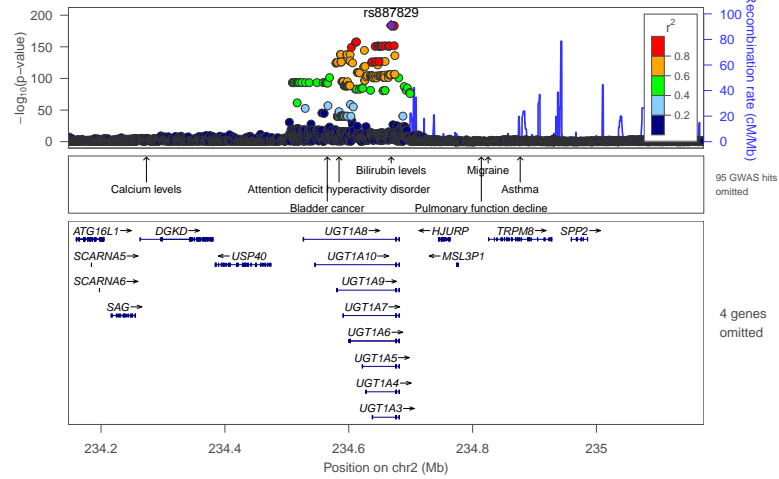

tetrahydrocortisone glucuronide (5)

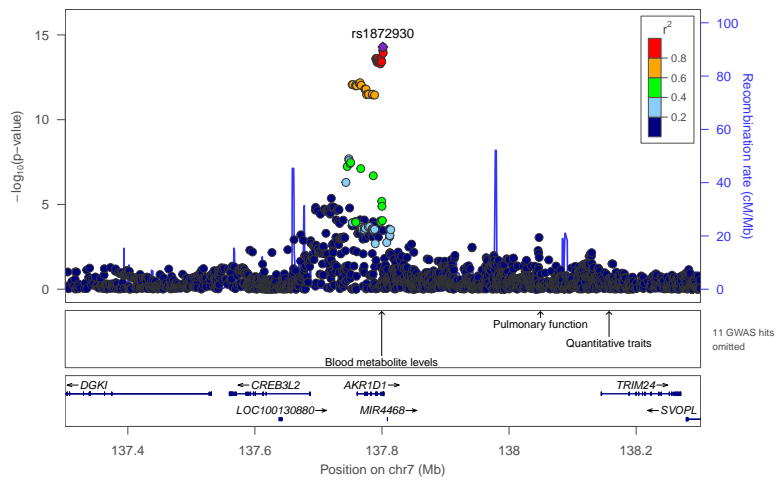

Supplement: 41588_2023_1409_MOESM4_ESM.pdf [file 41588_2023_1409_MOESM4_ESM.pdf]
