# Supplementary material for: Genetic studies of paired metabolomes reveal enzymatic and transport processes at the interface of plasma and urine
Source: PubMed Central journal article supplement (PMC10260405; doi:10.1038/s41588-023-01409-8), 2023-06-05

### 4-guanidinobutanoate

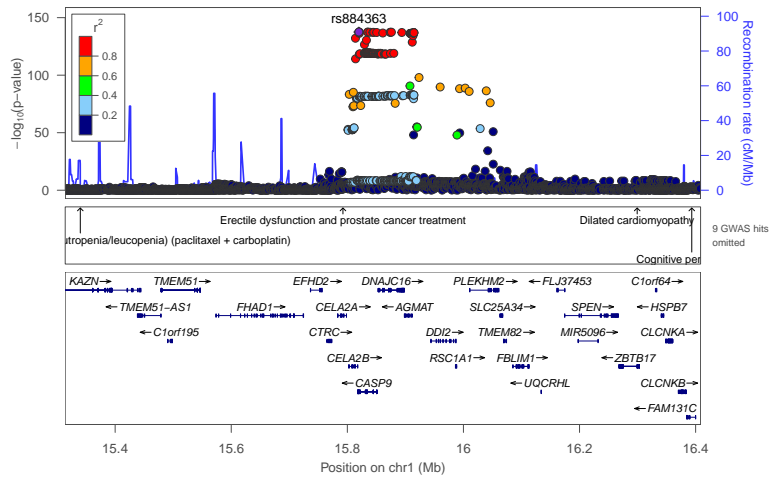

### beta-guanidinopropanoate

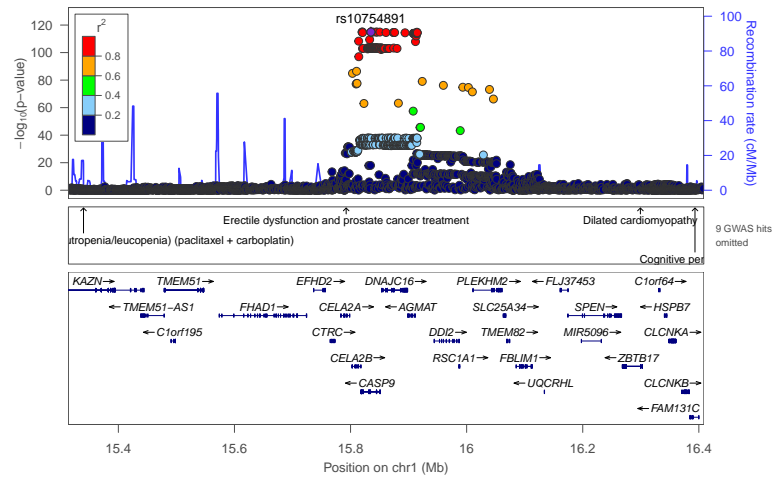

### taurocyamine

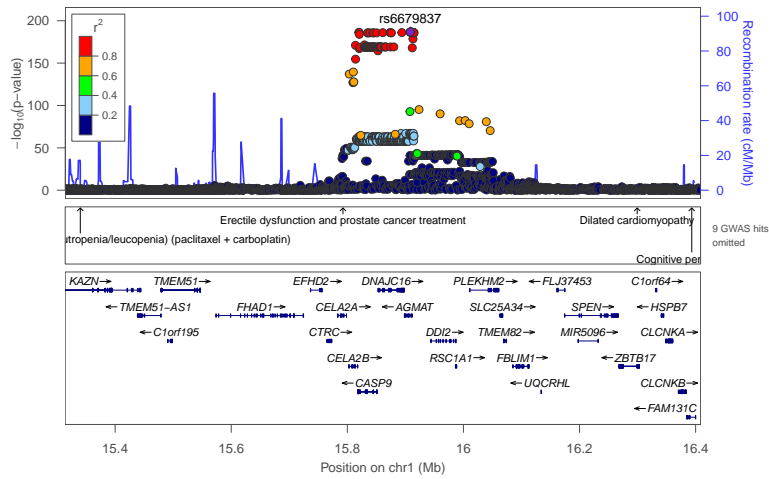

### argininate\*

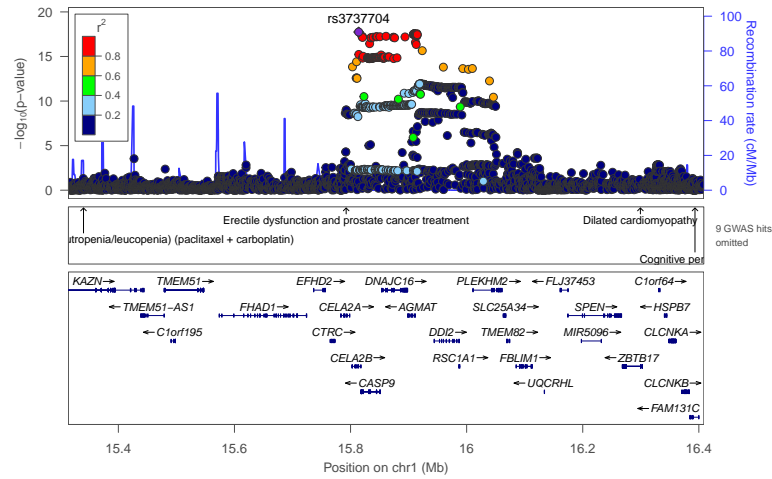

### X - 24462

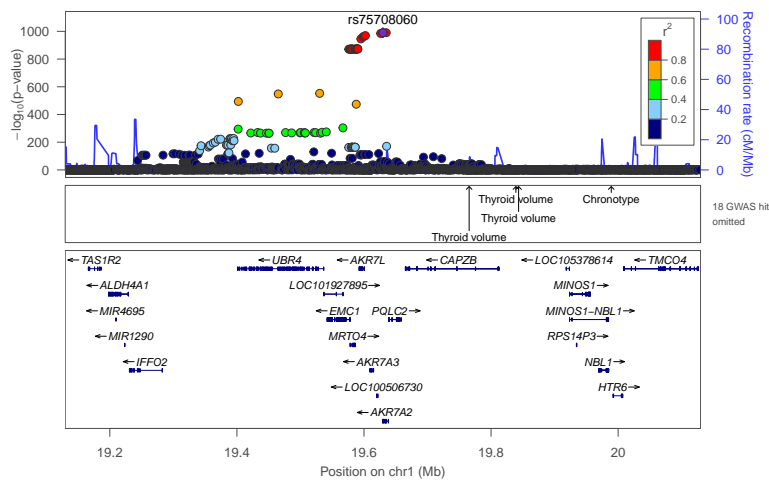

### cytidine

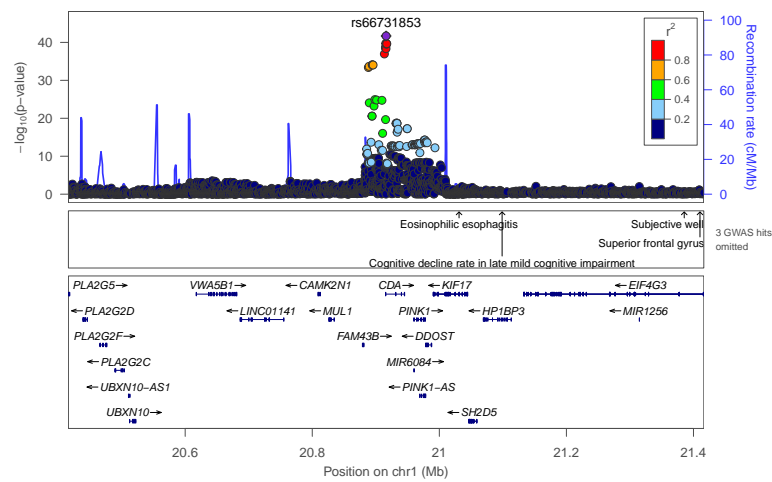

### phosphoethanolamine

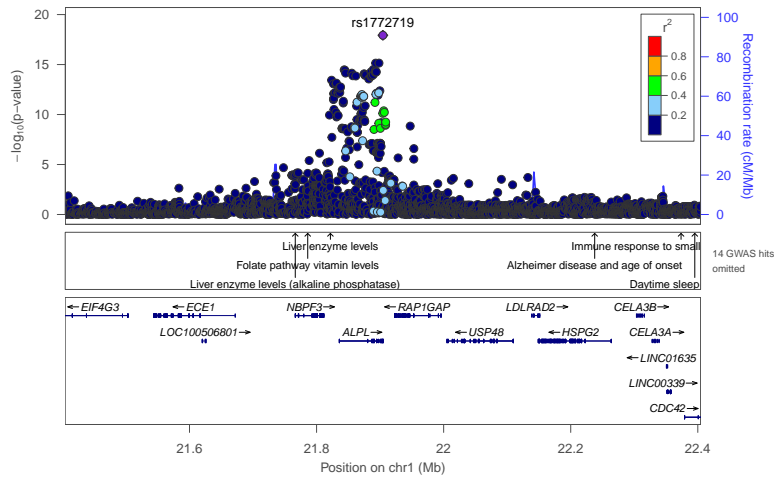

### glucarate (saccharate)

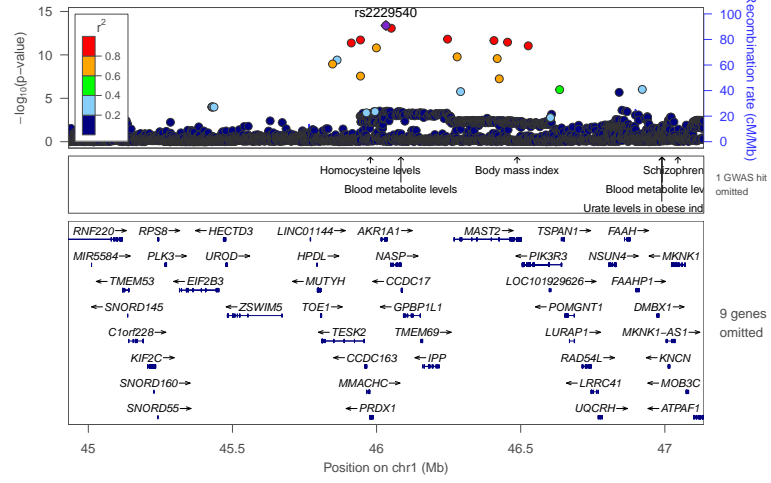

### ribitol

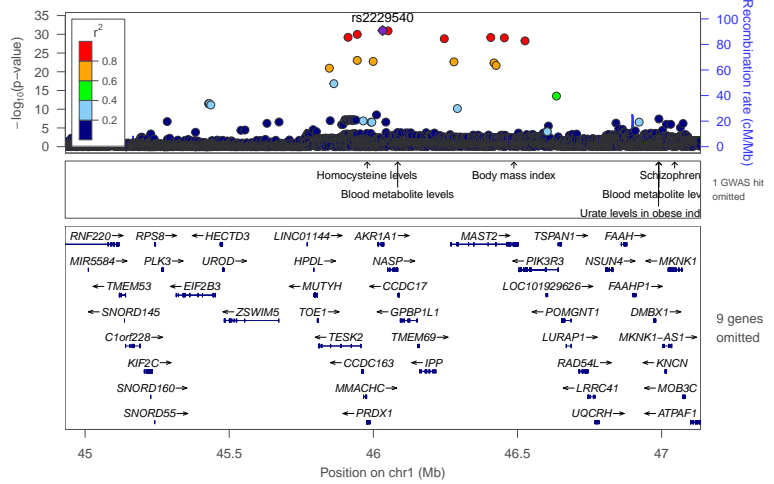

### erythritol

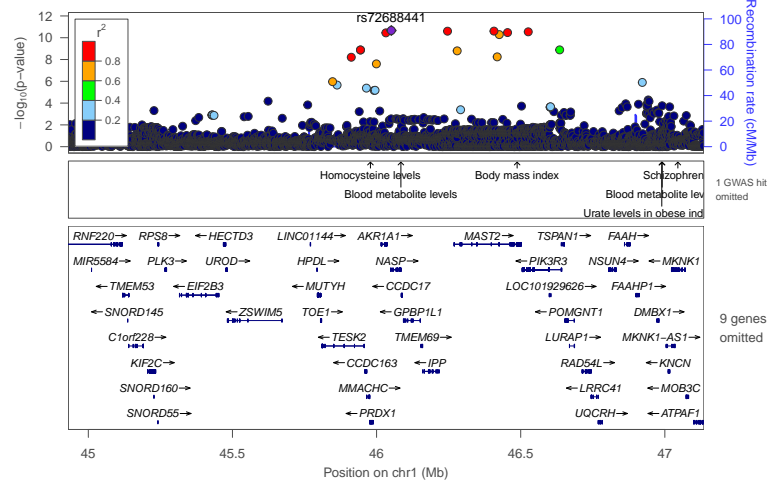

### cis-3,4-methyleneheptanoylglycine

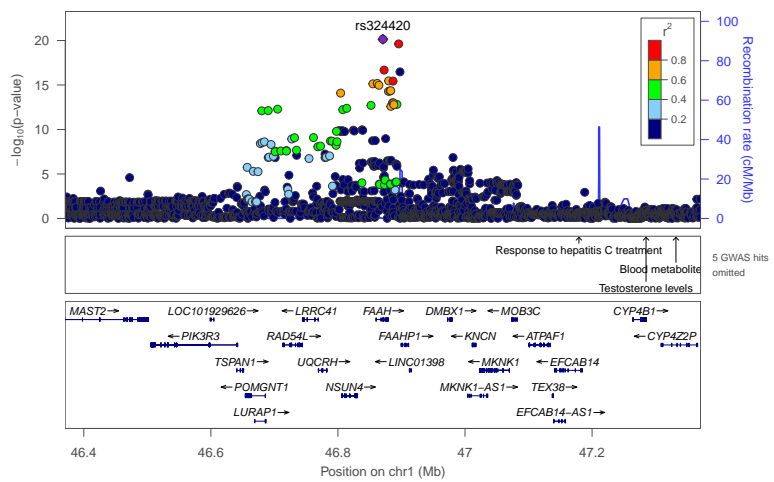

### 3-hydroxysebacate

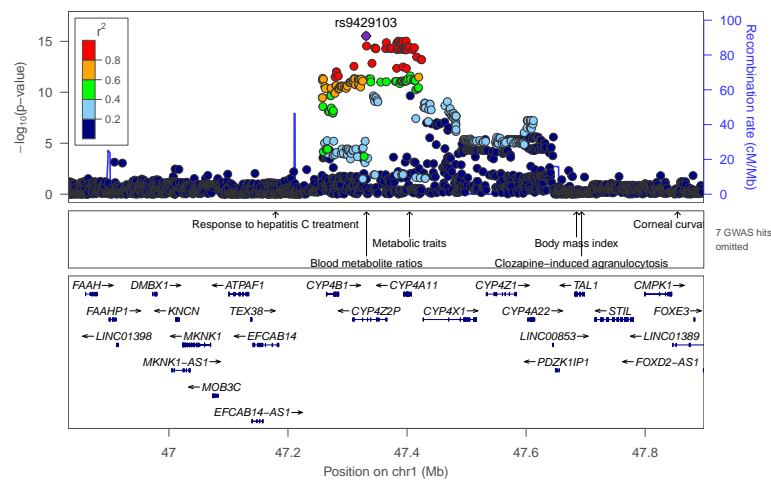

X - 21827

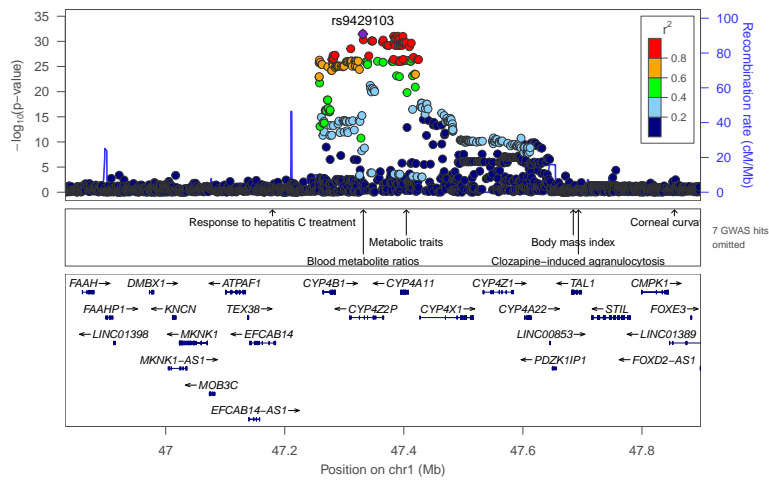

X - 21829

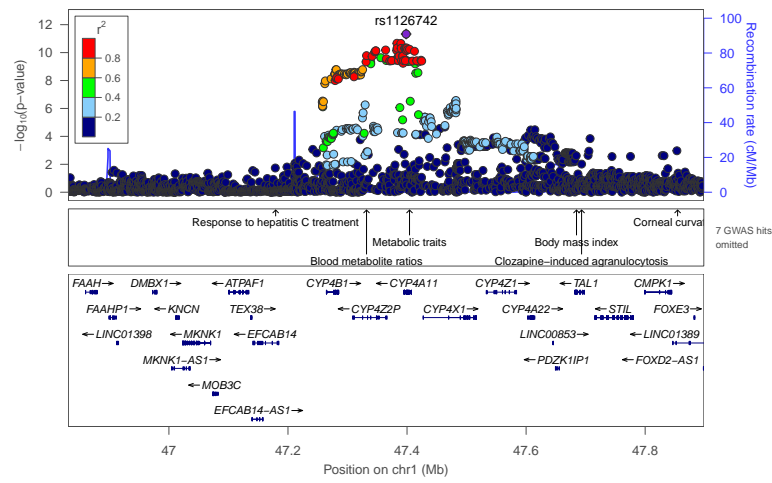

X - 12839

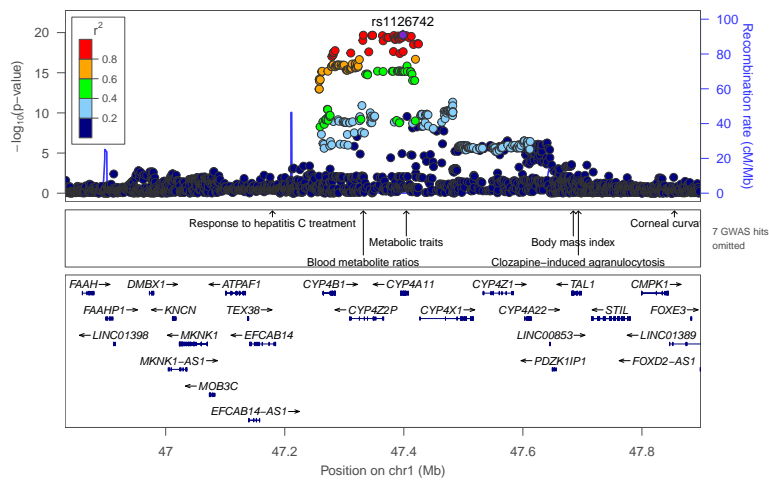

X - 17324

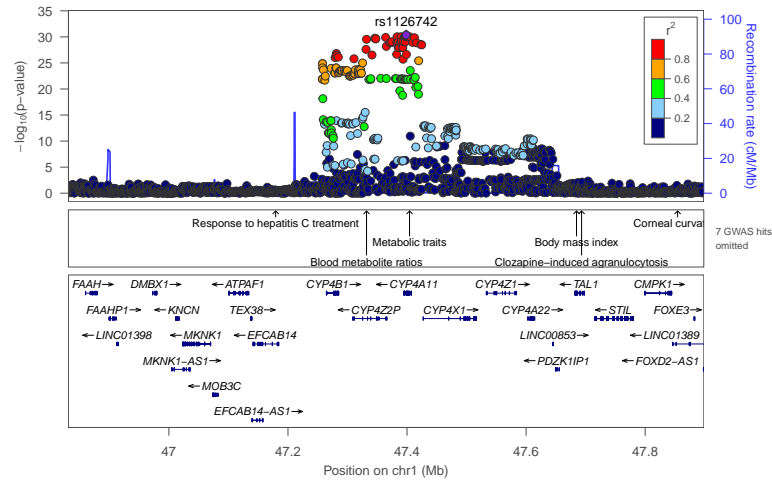

X - 13874

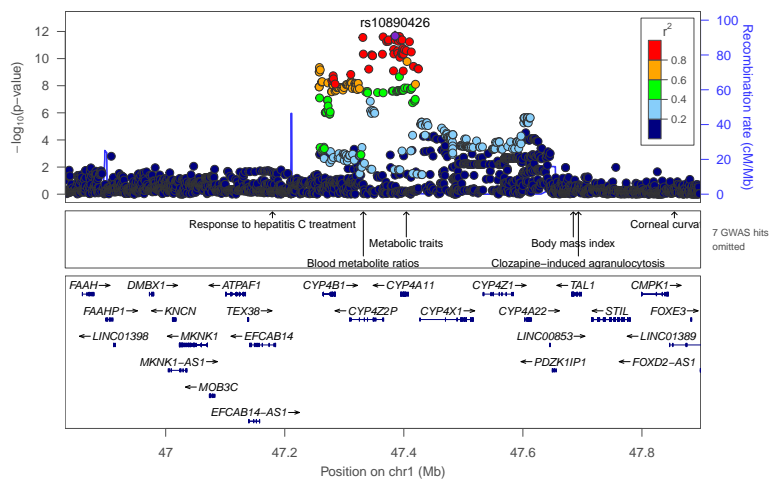

3-hydroxyoctanoyl glycine

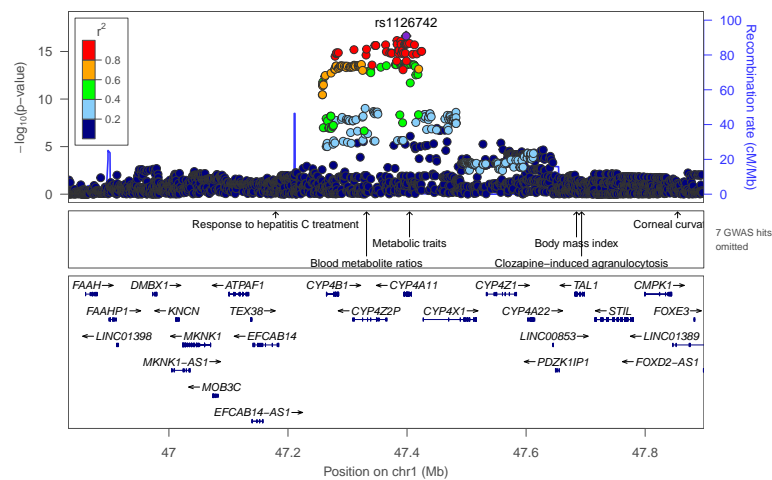

### 2-hydroxysebacate

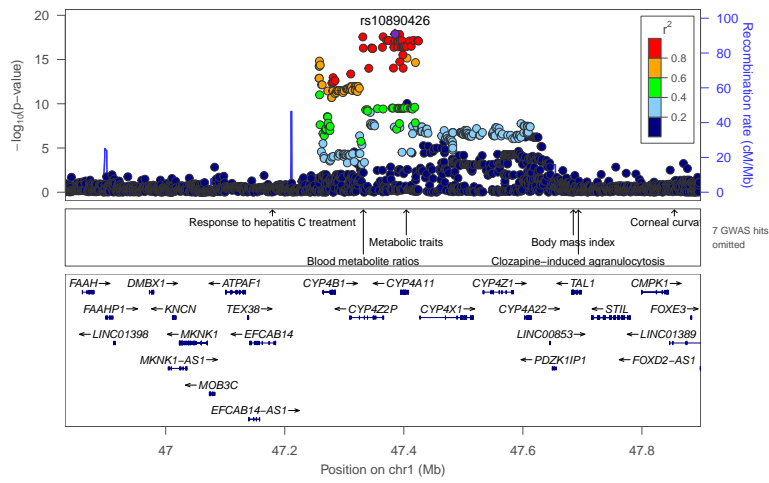

### X - 24345

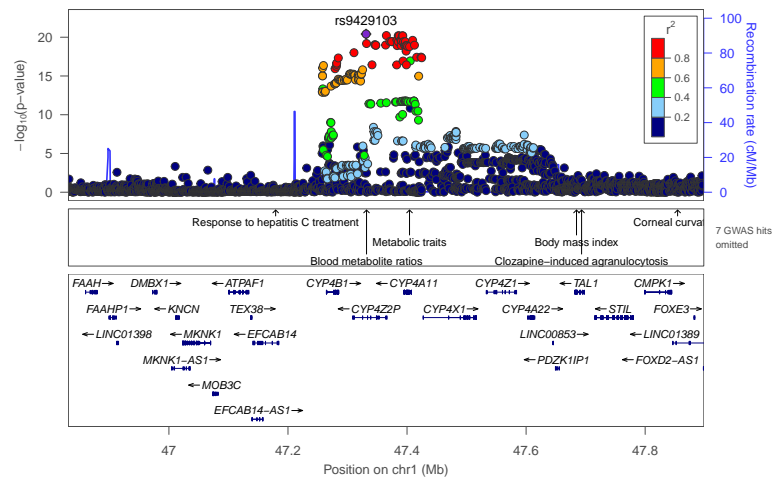

### X - 24346

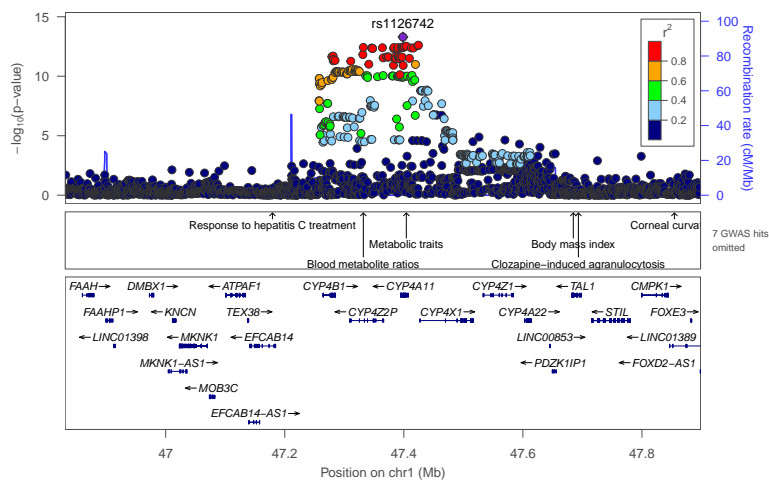

### glutamine conjugate of C10H16O2 (2)\*

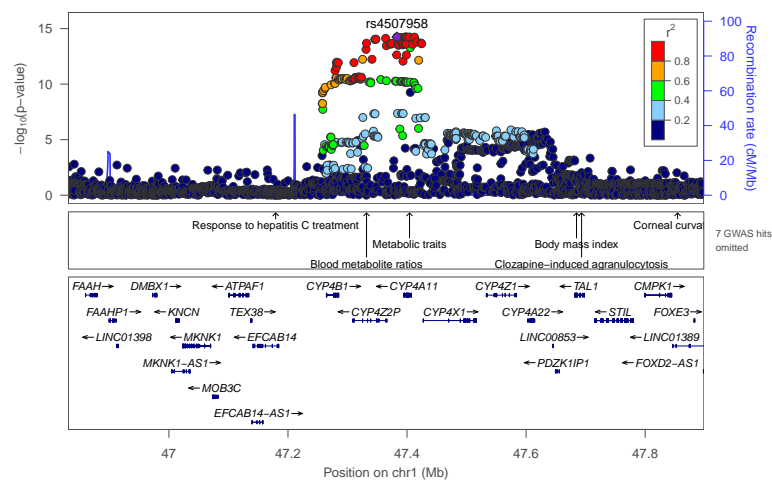

### adipoylcarnitine (C6-DC)

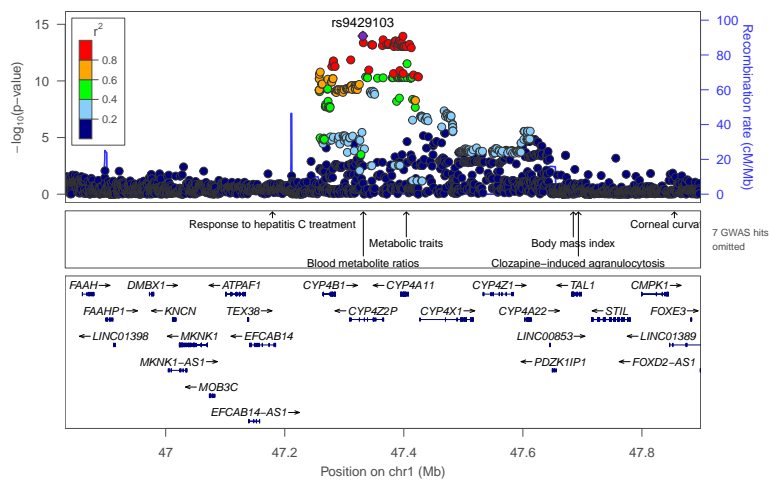

### N-octanoylglutamine

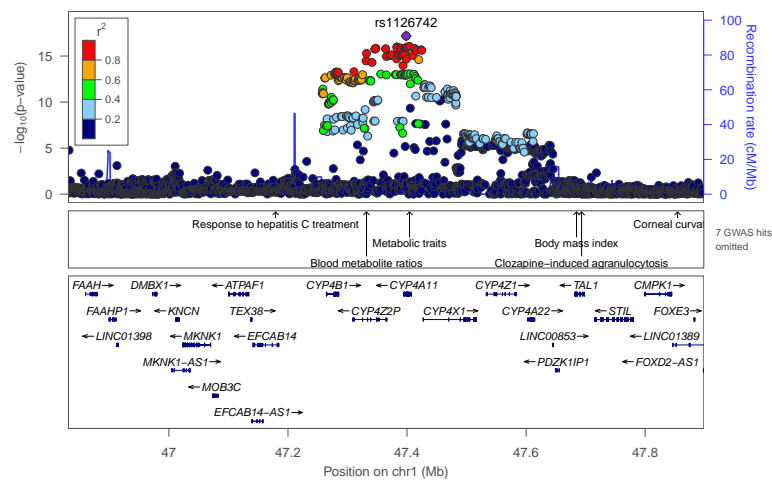



glucuronide of C10H18O2 (11)\*

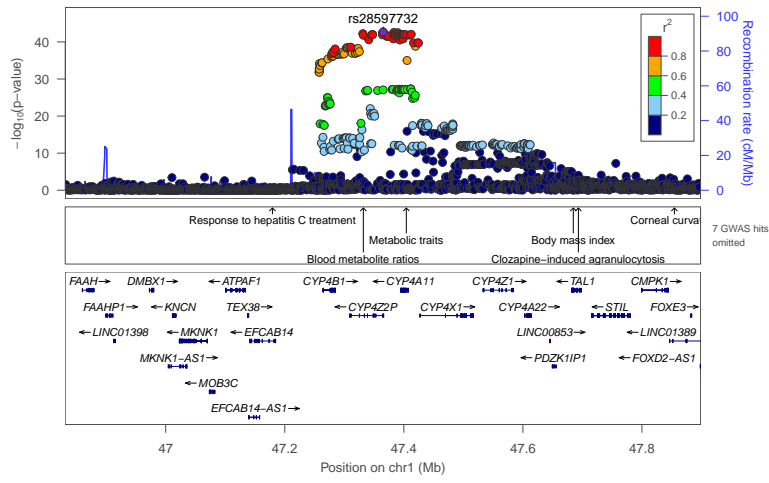

glucuronide of C10H18O2 (12)\*

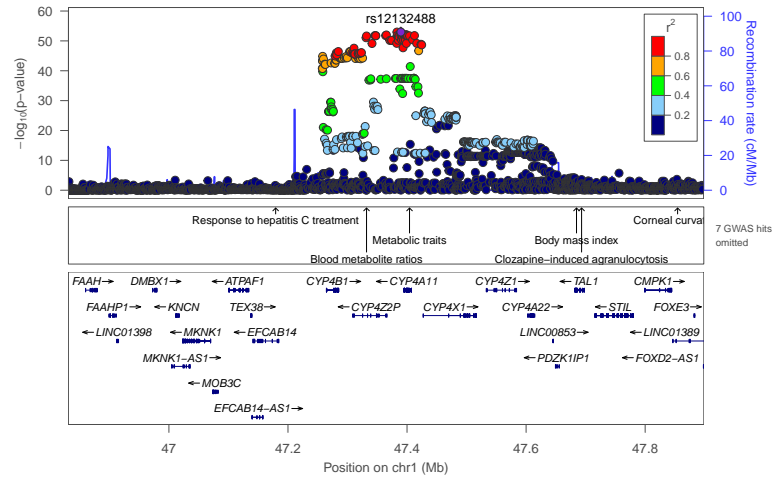

glucuronide of C12H20O3 (2)\*

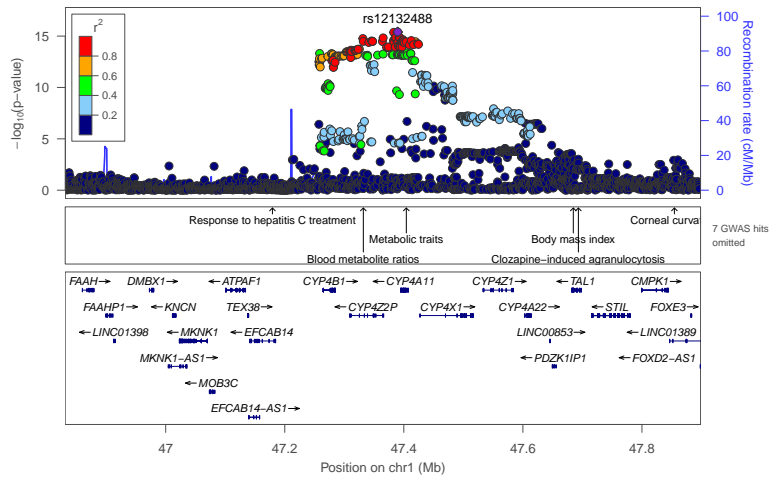

glutamine conjugate of C8H12O4 (1)\*

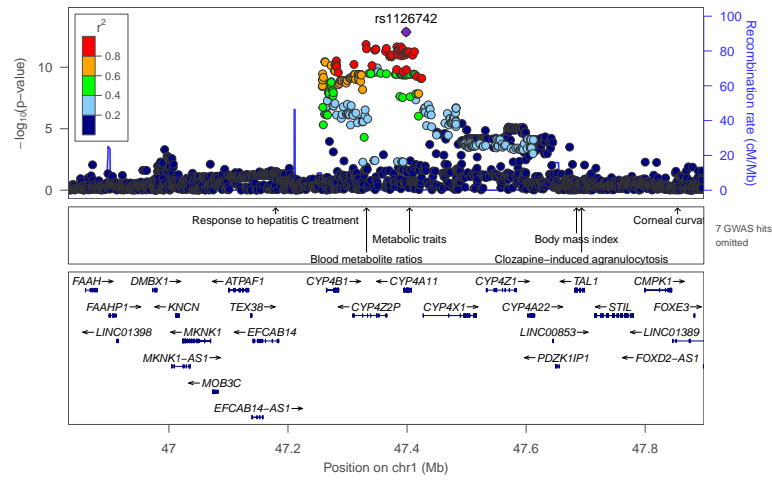

mannose

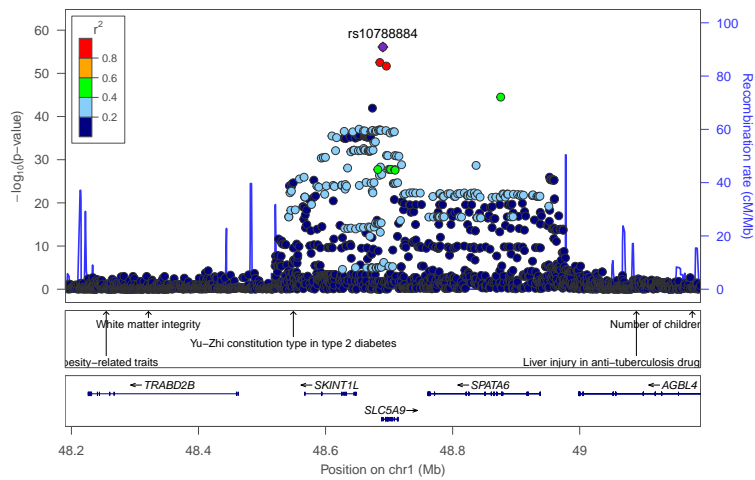

glutarylcarnitine (C5-DC)

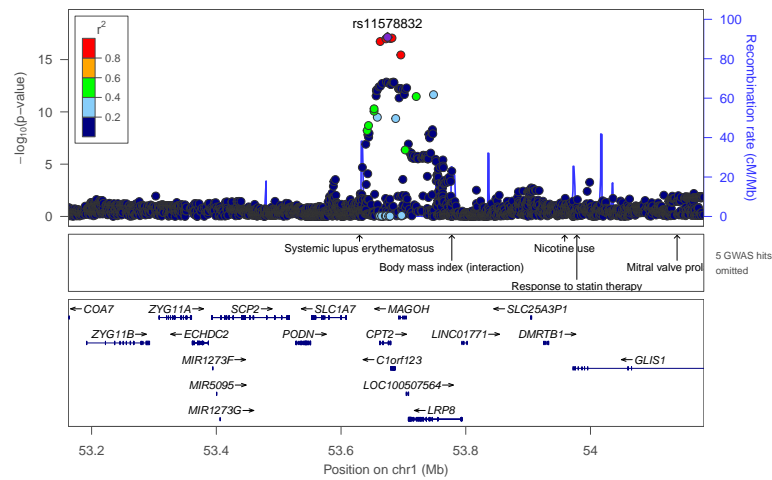

### X - 24469

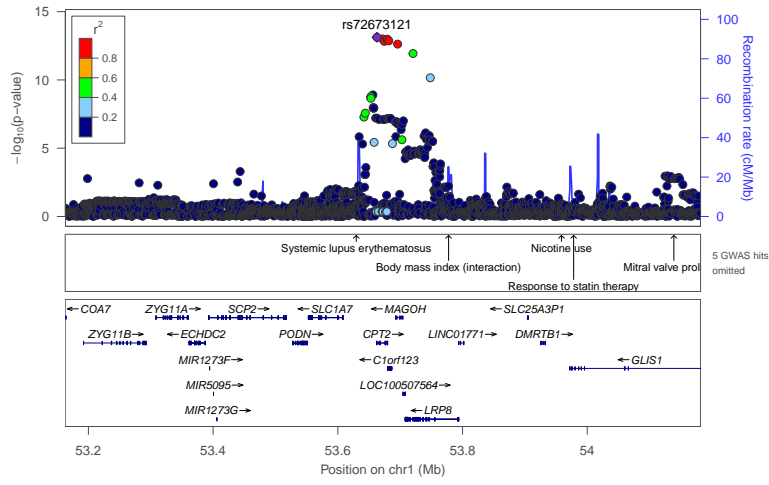

### adipoylcarnitine (C6-DC)

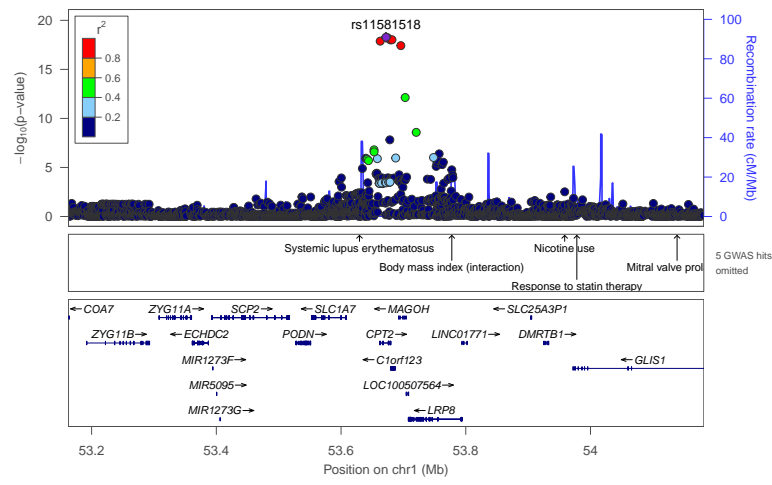

### methylsuccinoylcarnitine

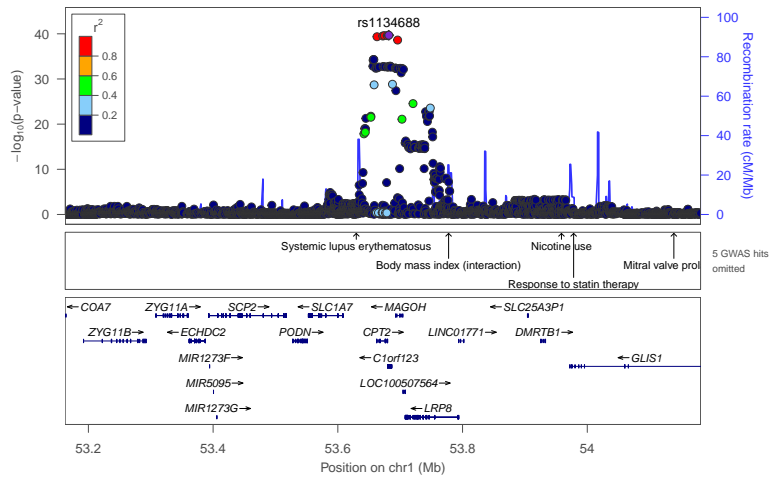

### cystathionine

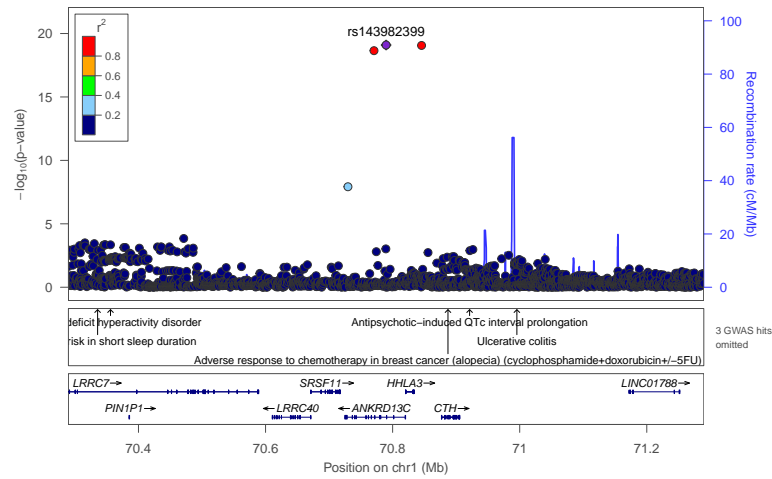

### hexanoylcarnitine (C6)

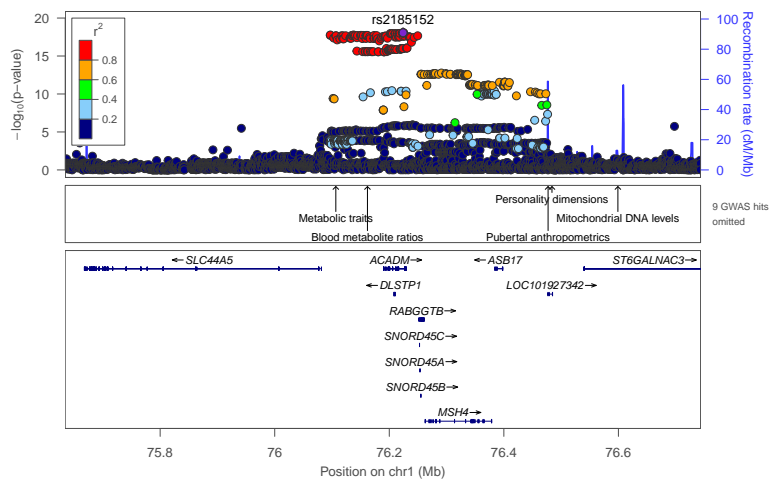

### octanoylcarnitine (C8)

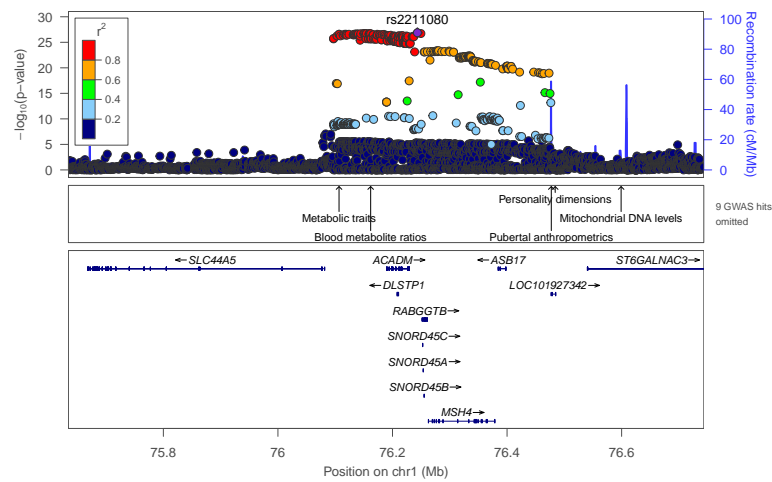

### decanoylcarnitine (C10)

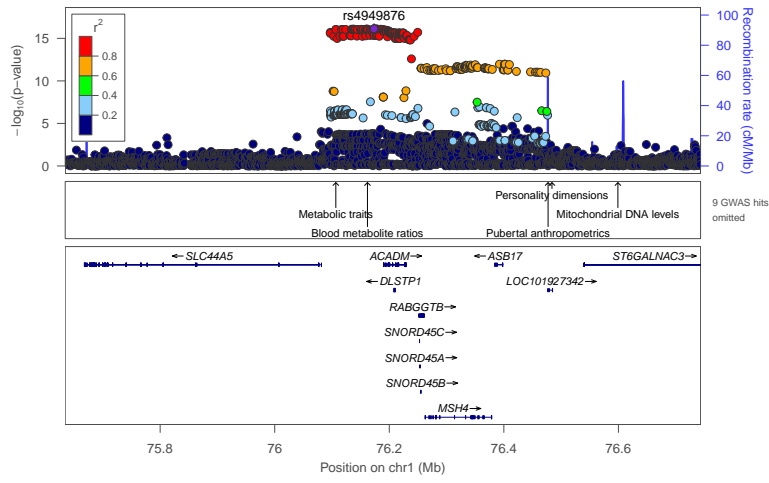

### hexanoylglycine

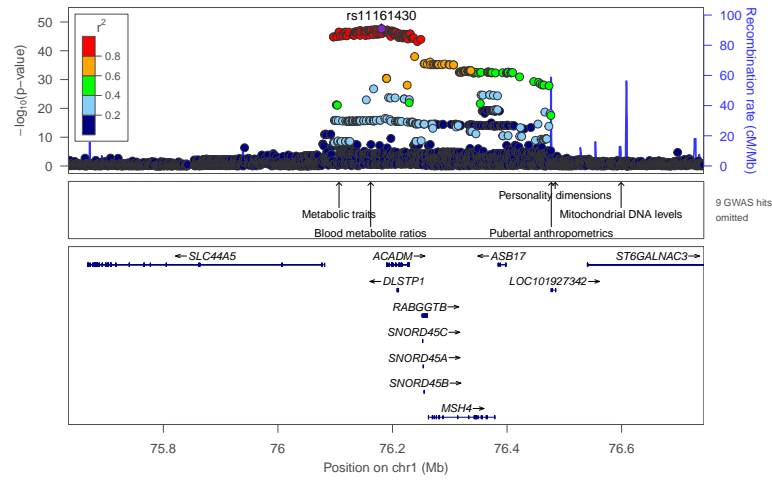

### hexanoyltaurine

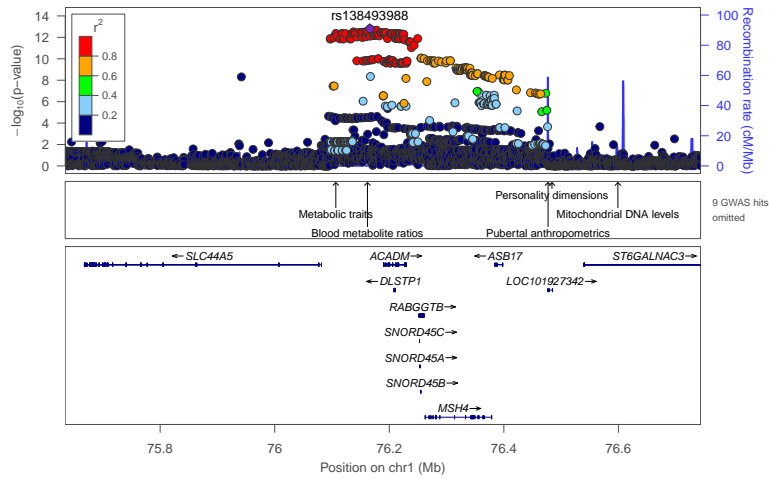

### glycine conjugate of C6H10O2 (1)\*

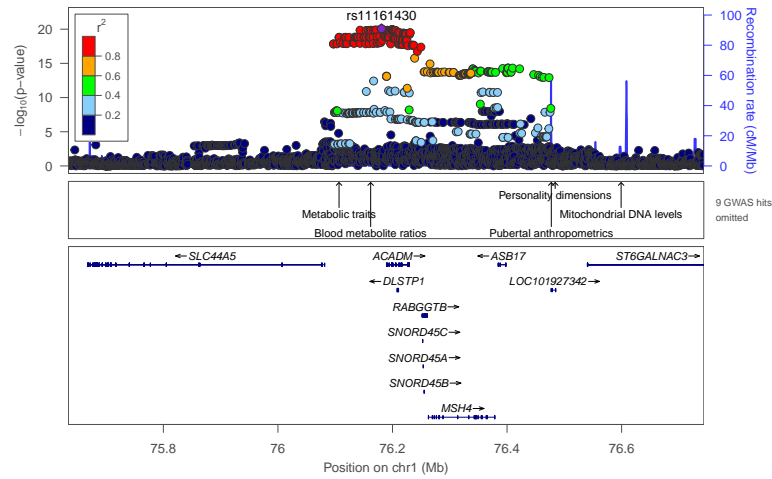

### suberoylcarnitine (C8-DC)

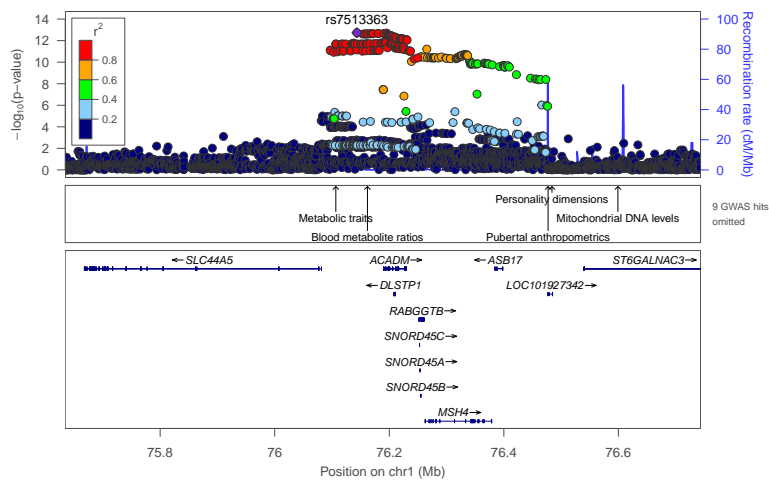

### hexanoylglutamine

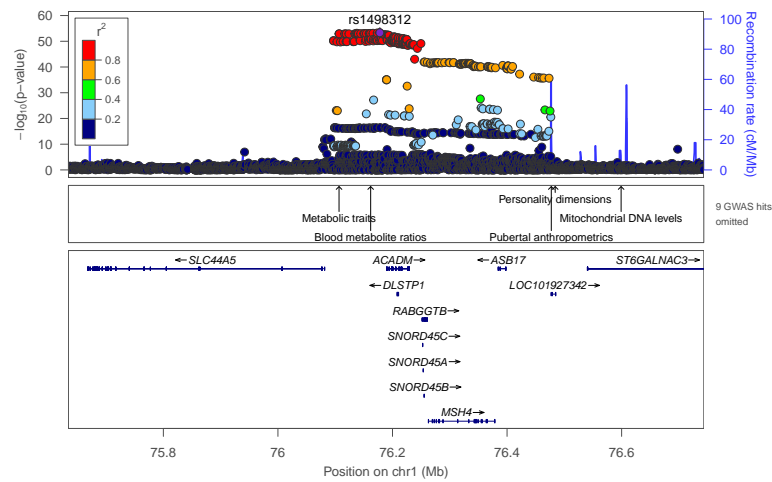

### indolepropionylglycine

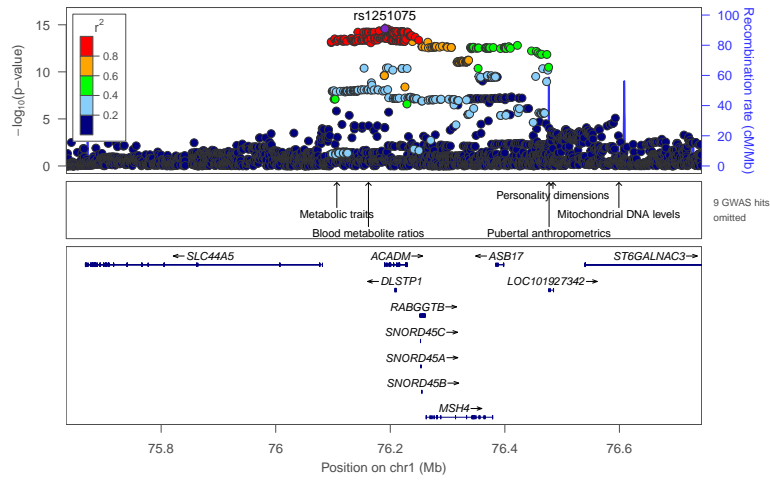

### heptanoylglutamine

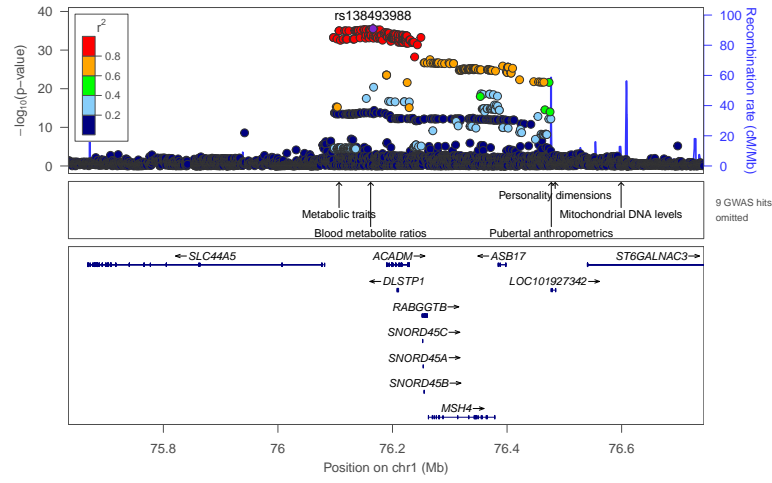

### N-octanoylglutamine

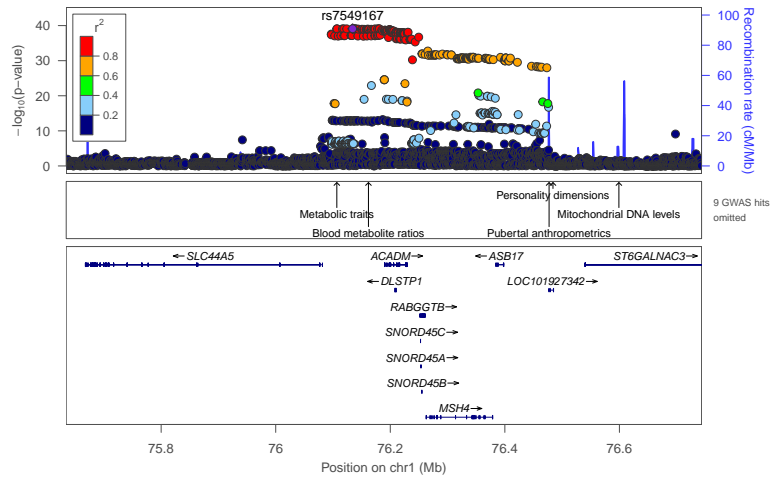

### isocaproylglycine

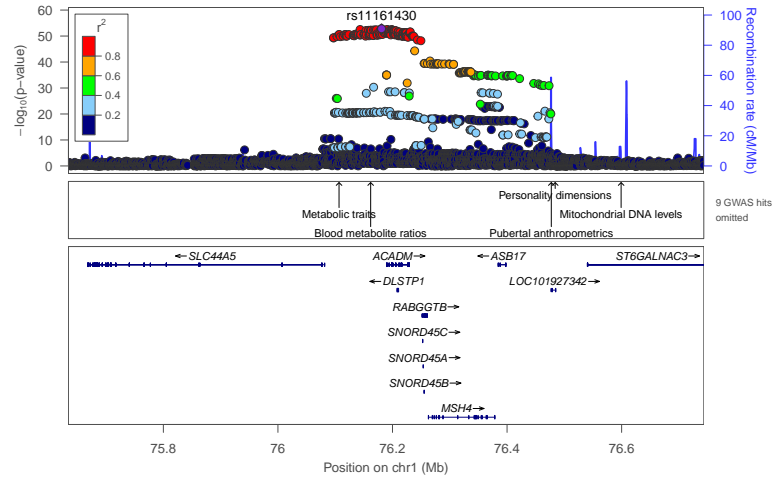

### isocaproylglutamine

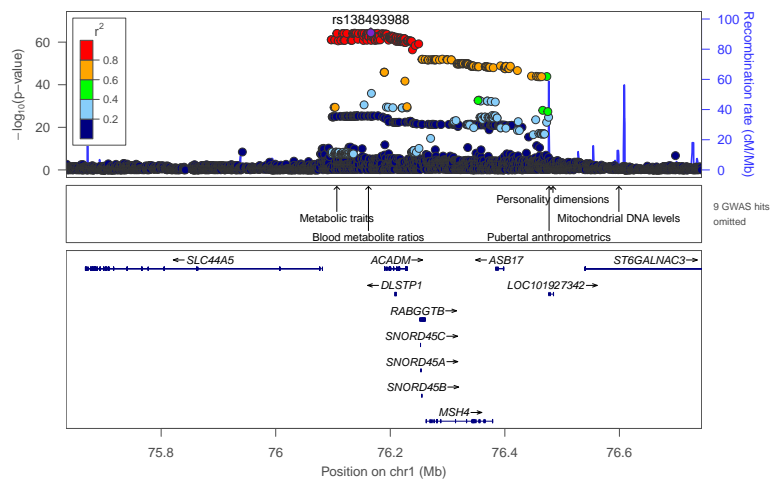

### 4-methylhexanoylglutamine

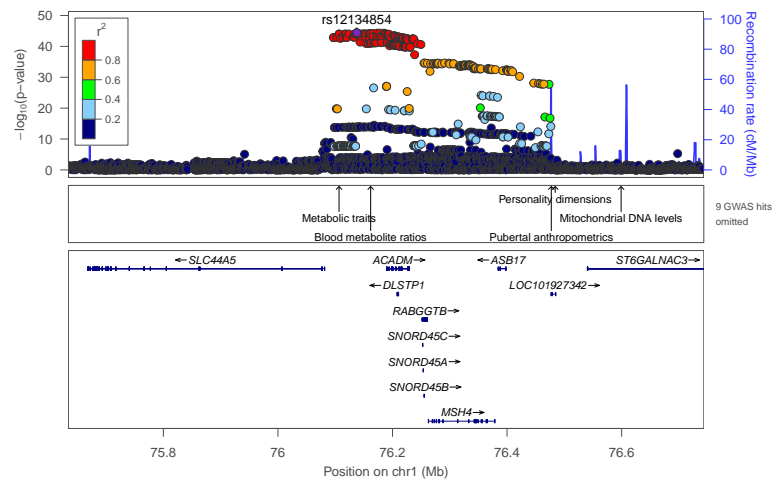

### 4-methylhexanoylglycine

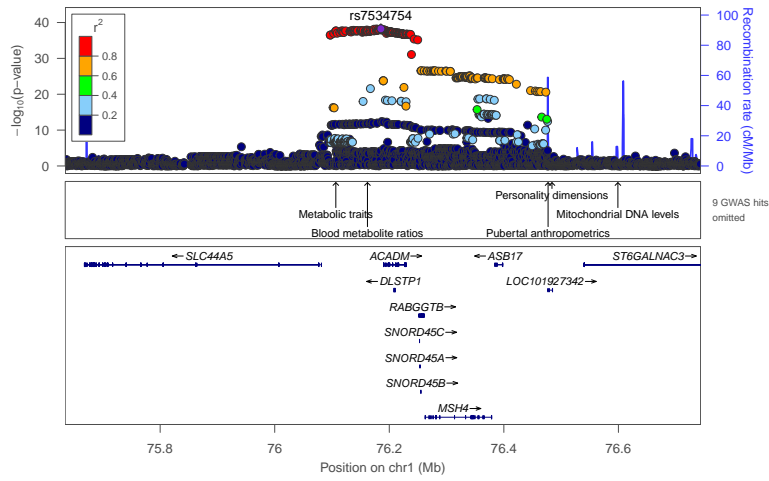

### X - 12097

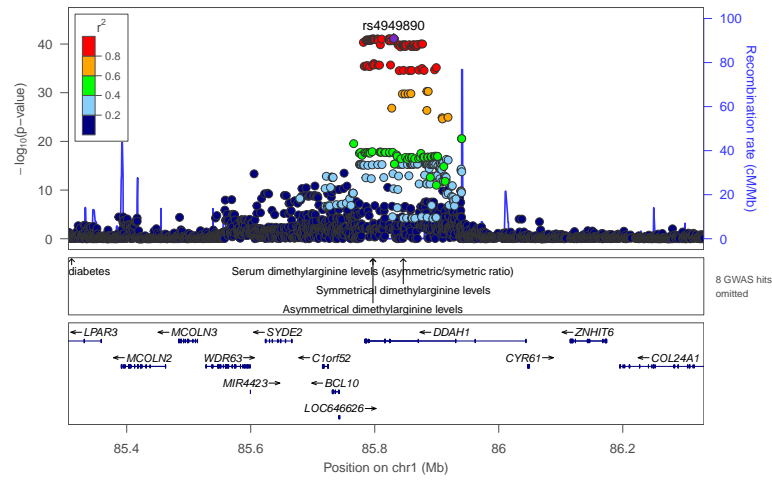

### X - 24518

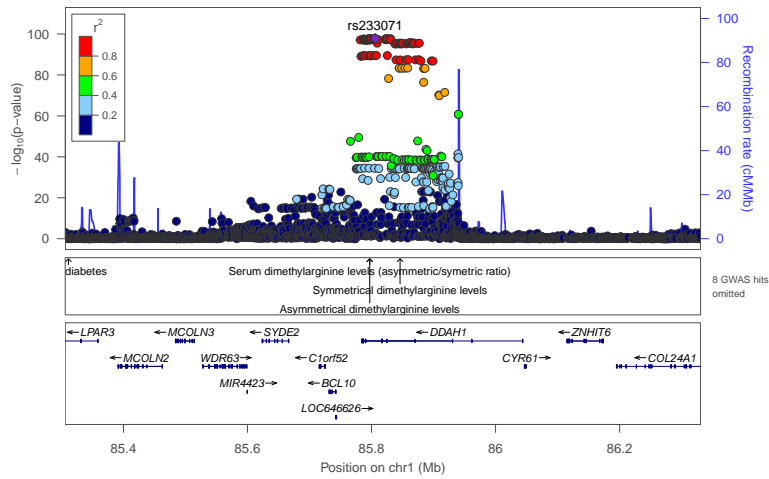

### imidazole lactate

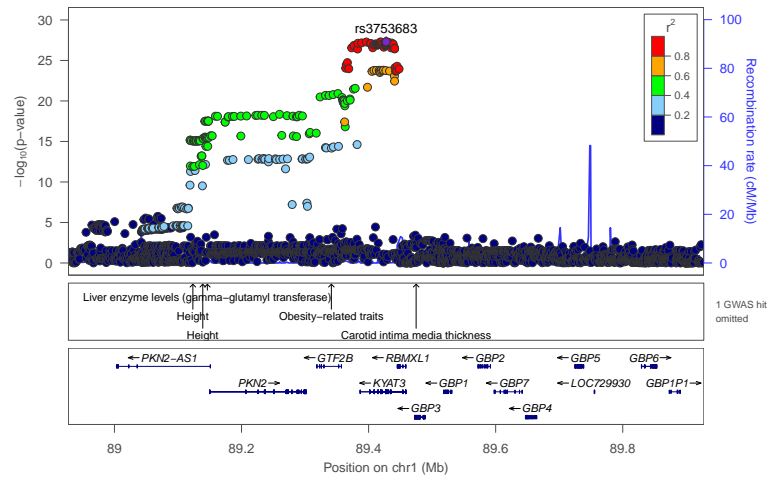

### 3,7-dimethylurate

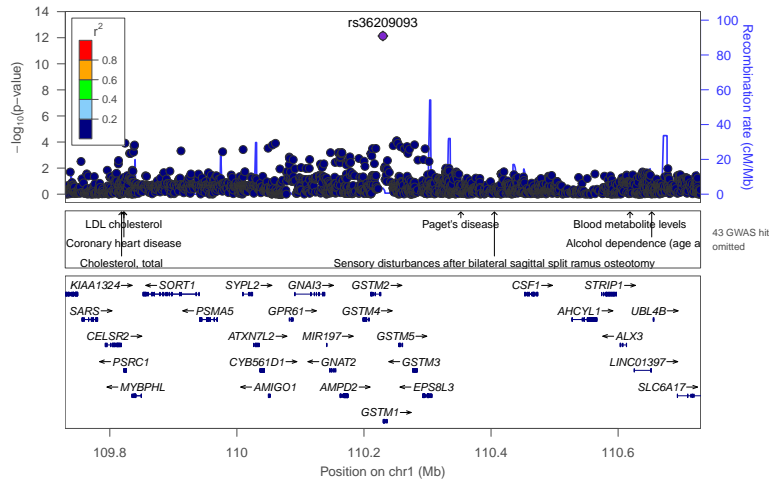

### X - 21796

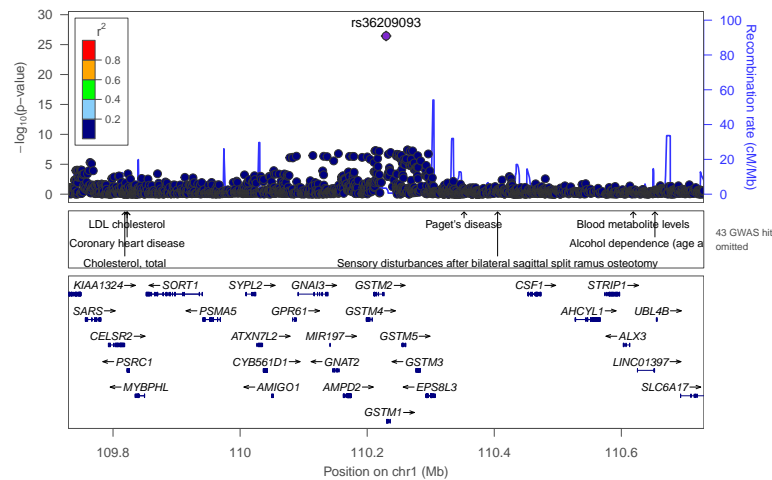



X - 23438

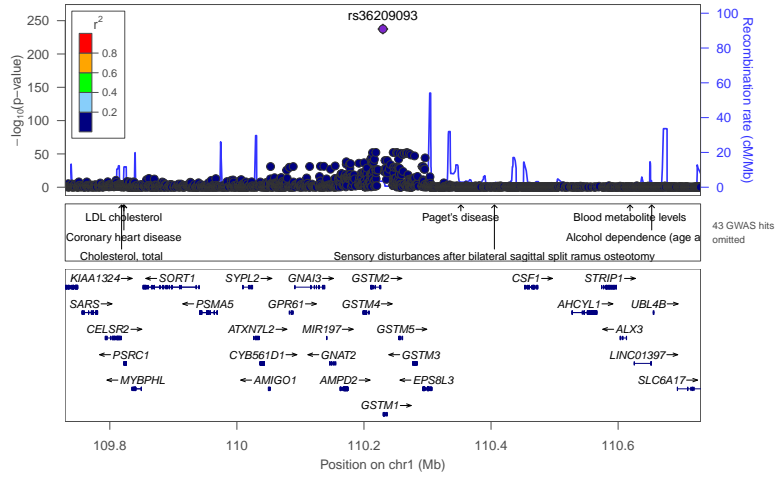

indolelactate

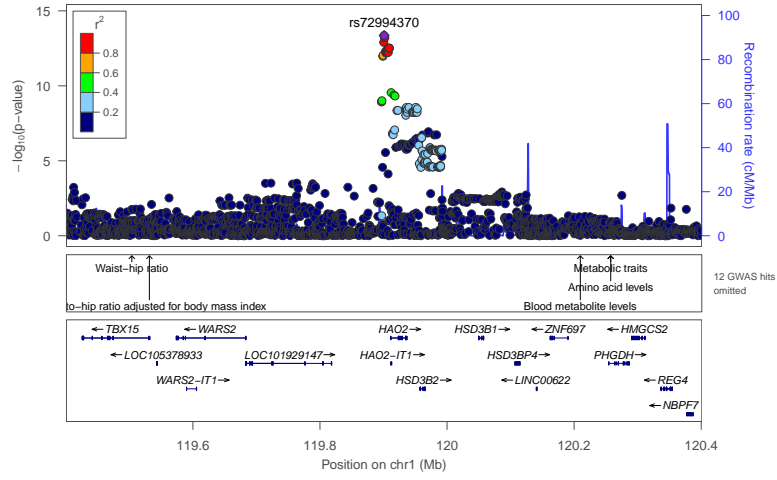

3-(4-hydroxyphenyl)lactate

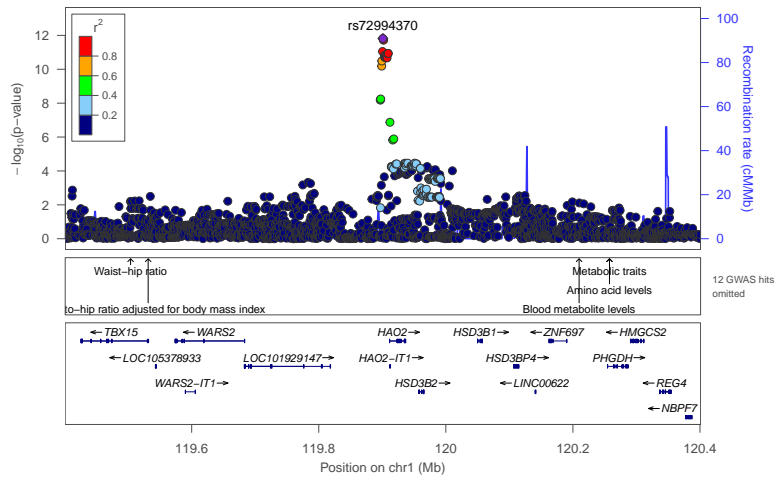

X - 24363

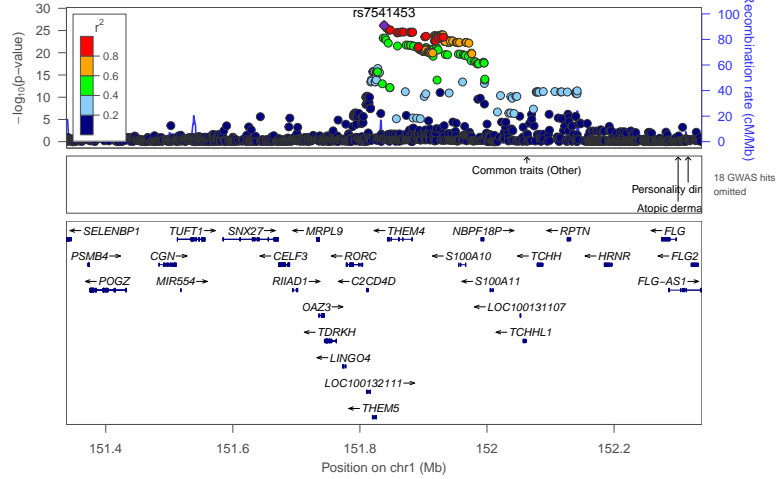

indoleacetylglutamine

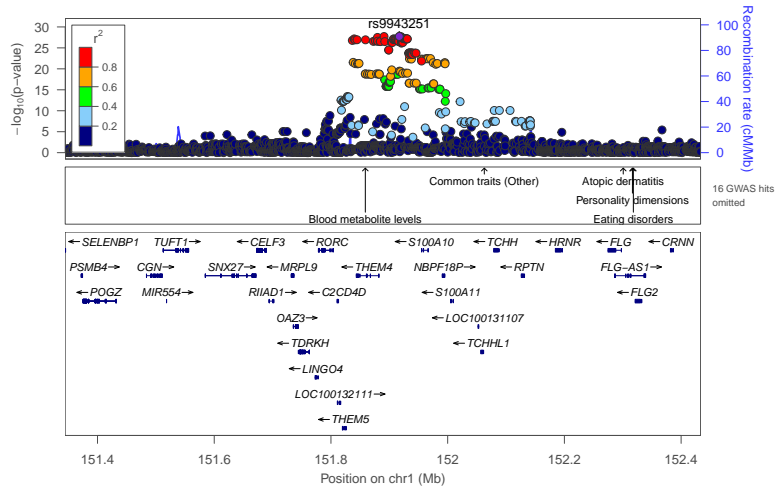

X - 21827

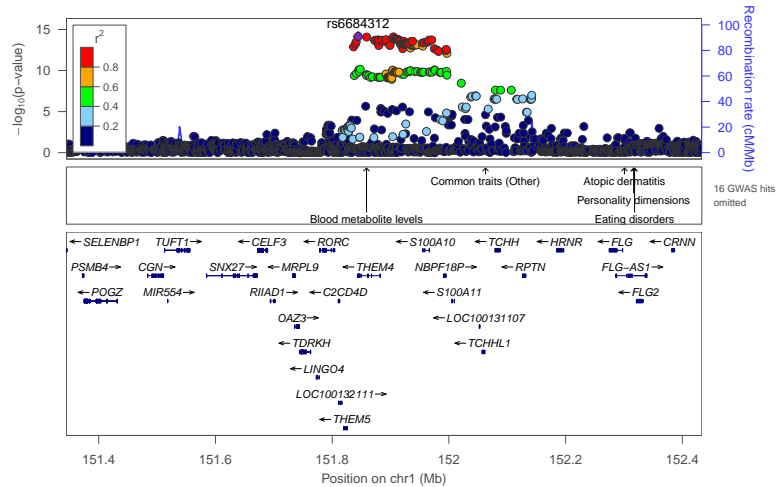

X - 13431

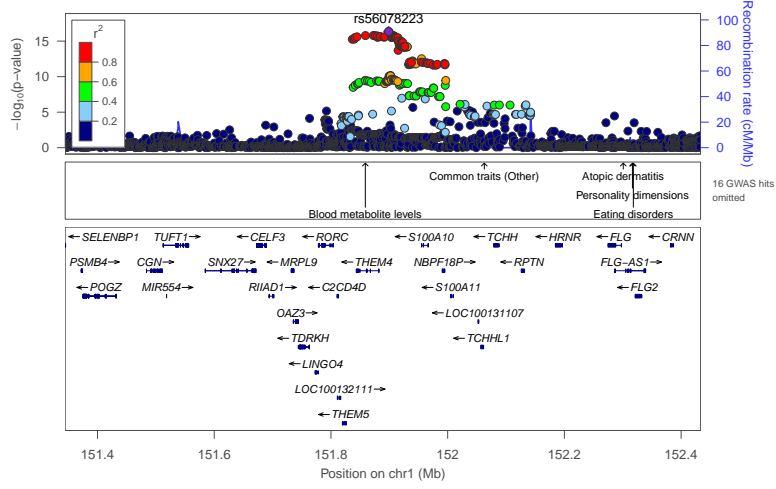

X - 13874

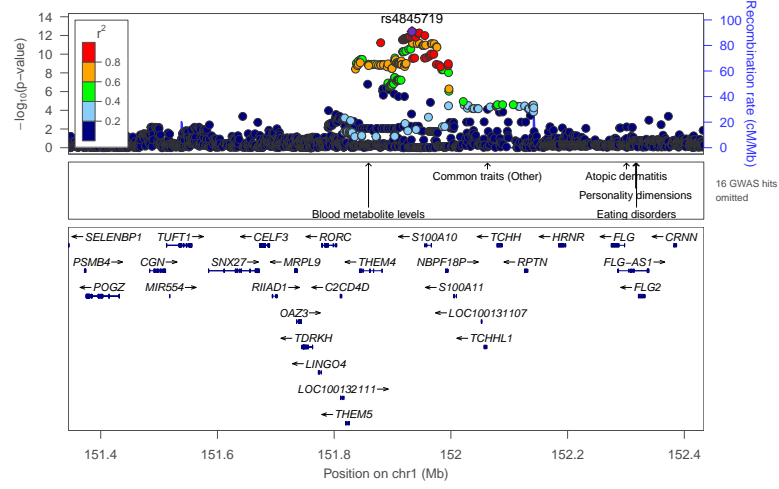

X - 23680

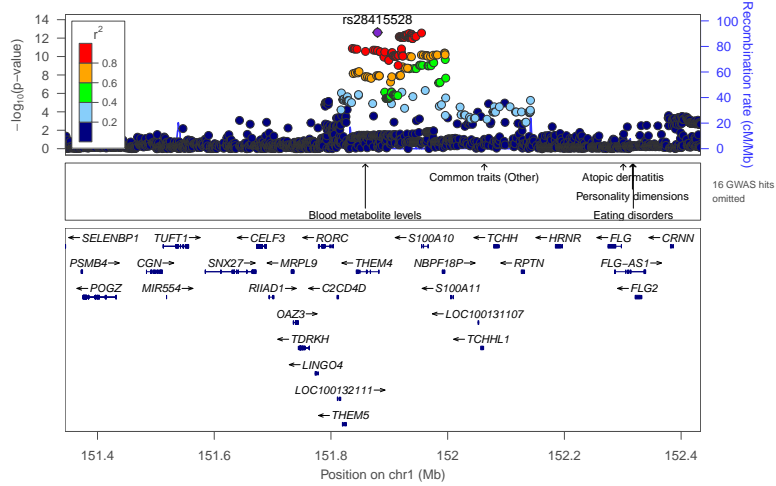

4-hydroxyphenylacetyl carnitine

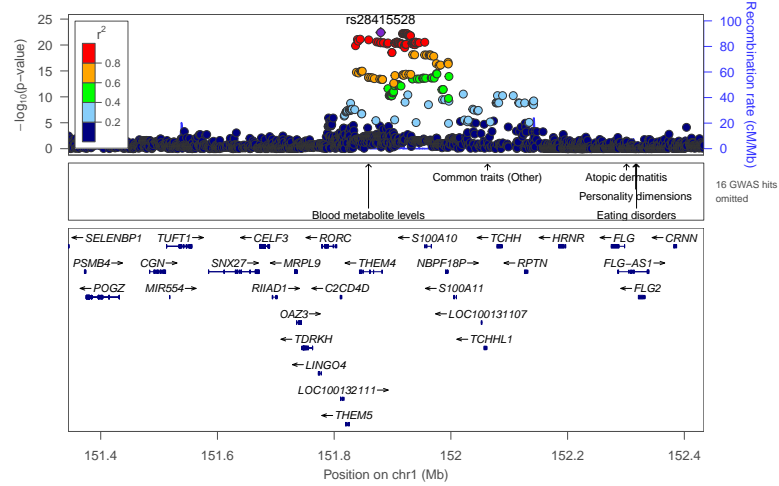

indoleacetyl glycine

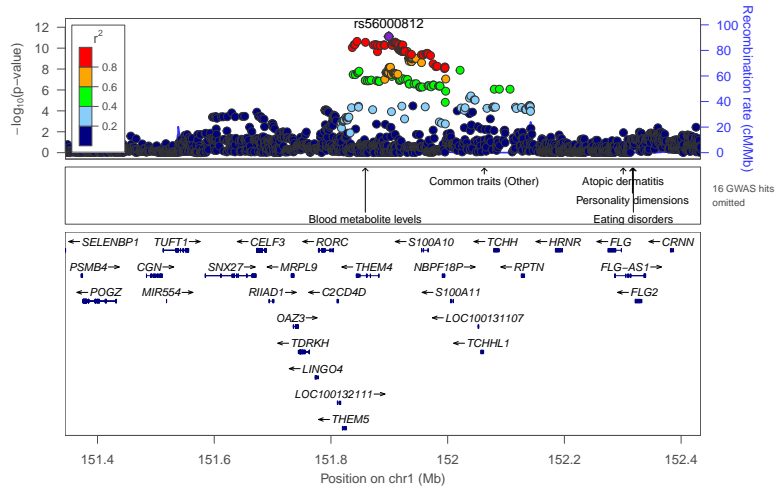

X - 24798

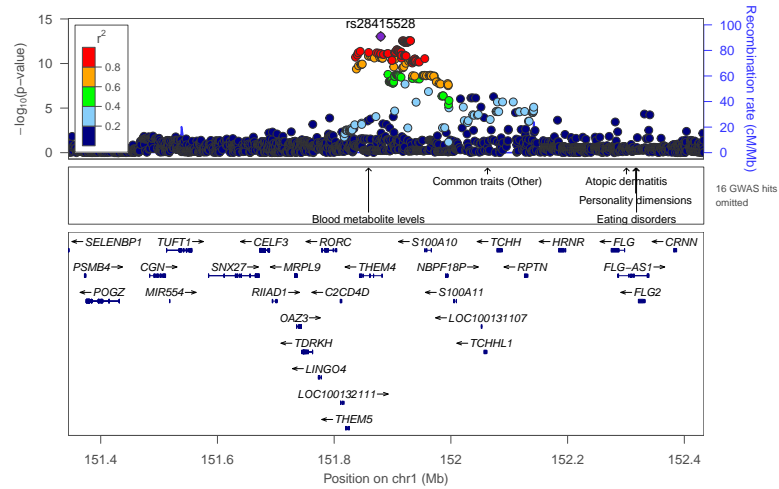

glucuronide of C8H14O2 (1)\*

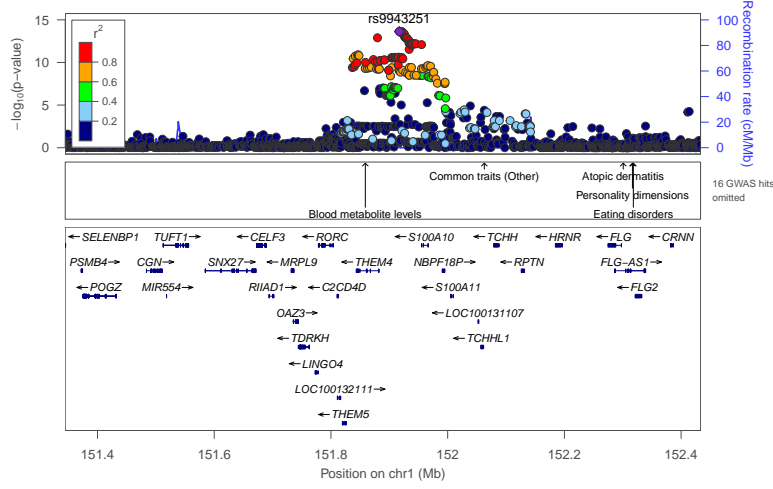

X - 13688

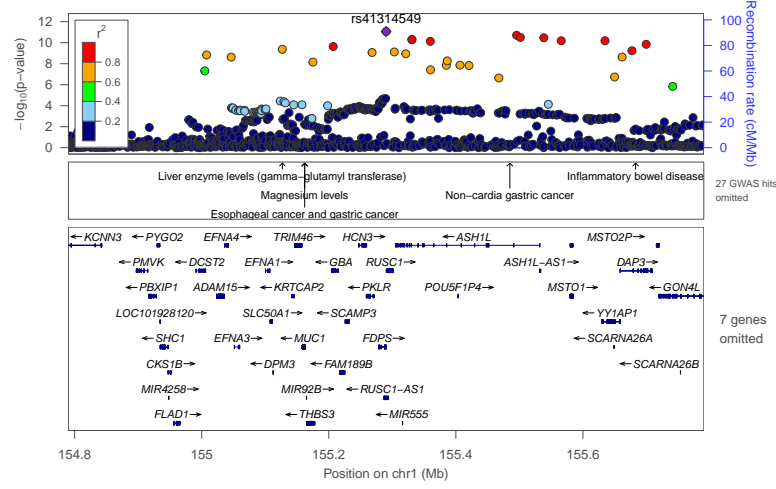

X - 24807

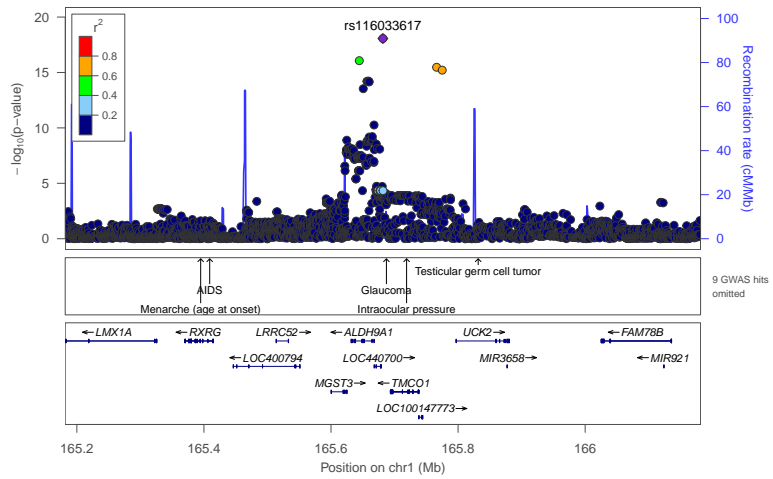

X - 25109

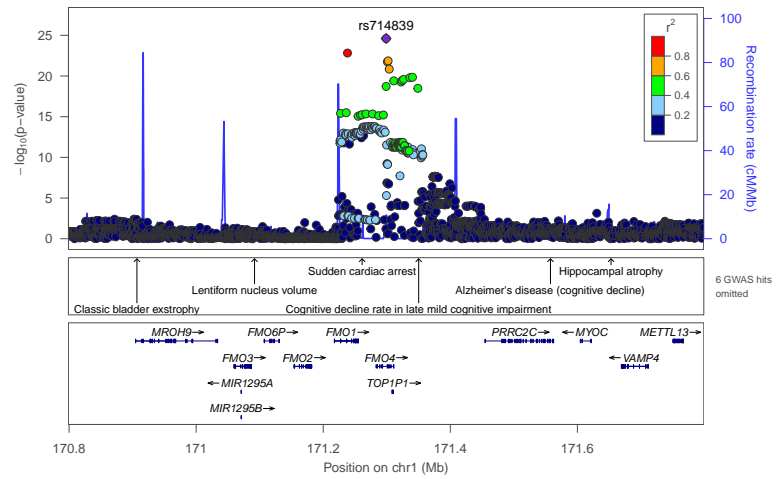

cysteine

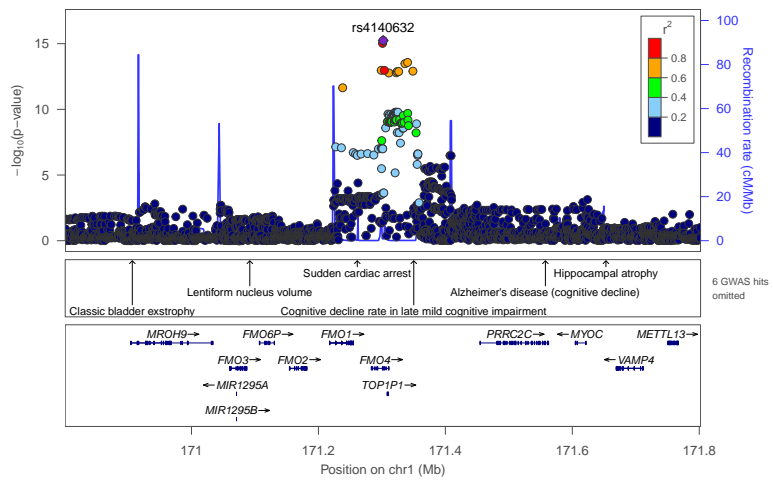

X - 14056

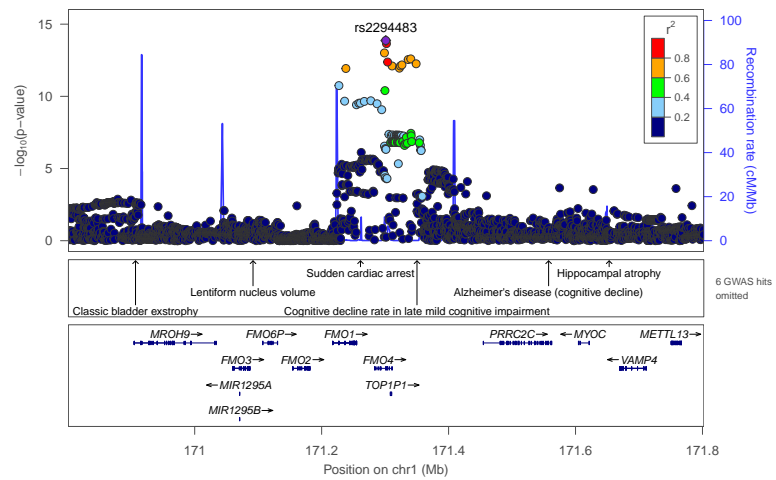

### N-acetylmethionine sulfoxide

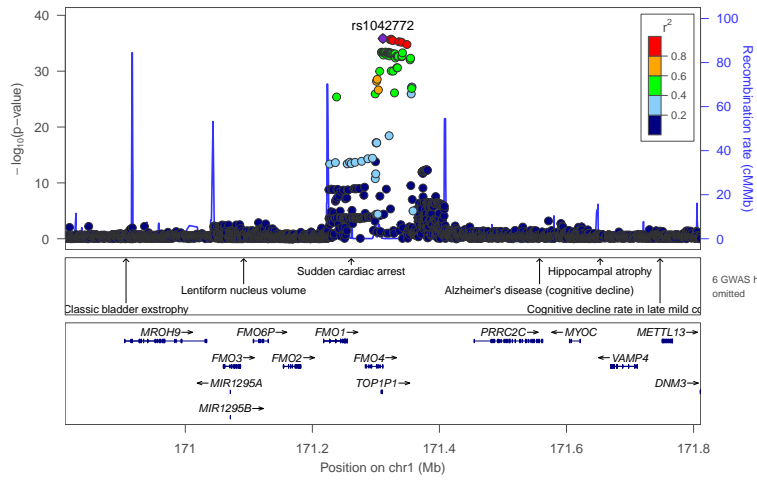

### cysteinylglycine

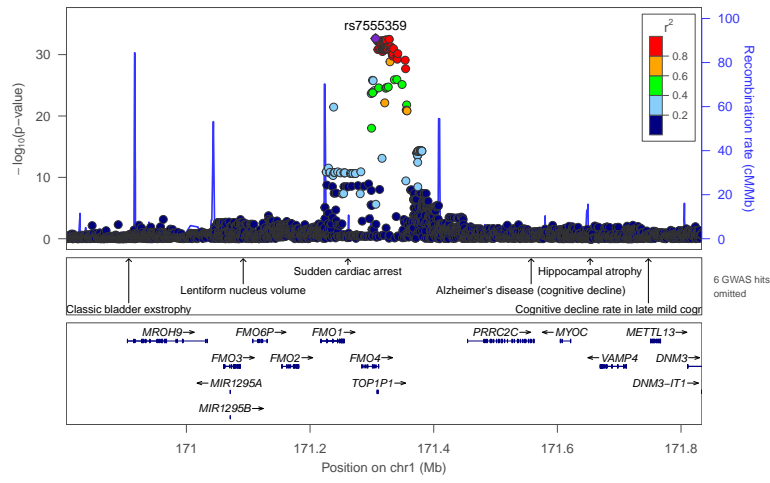

### S-(3-hydroxypropyl)mercapturic acid (HPMA)

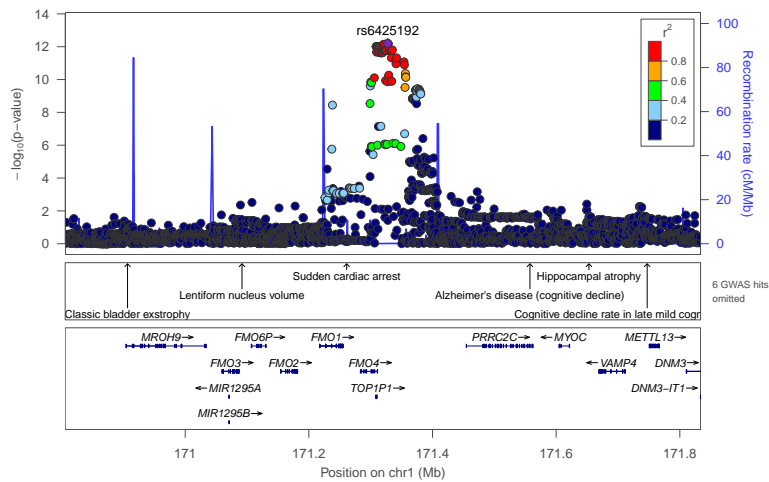

### X - 21842

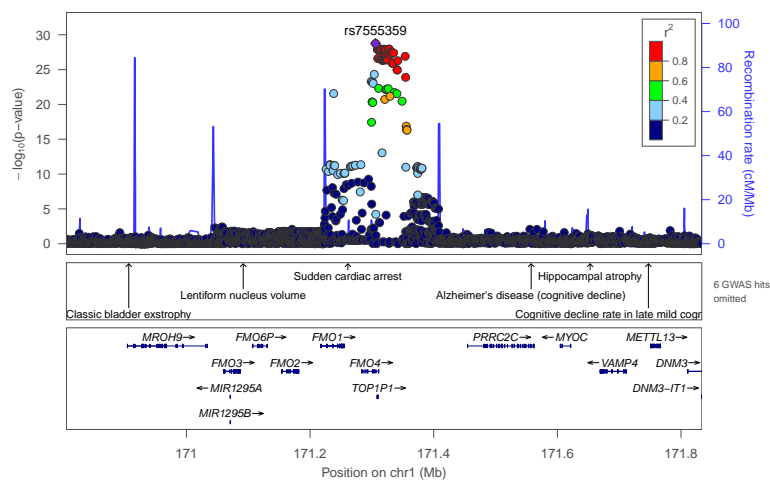

### X - 24403

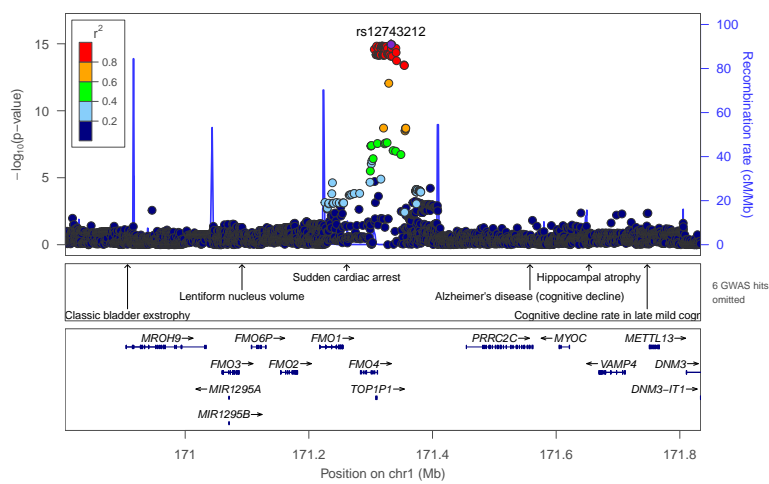

### X - 24414

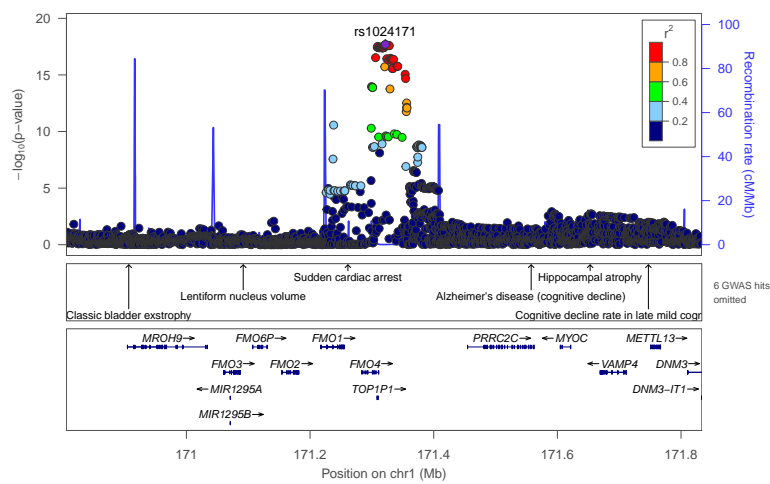

### phenylacetylmethionine

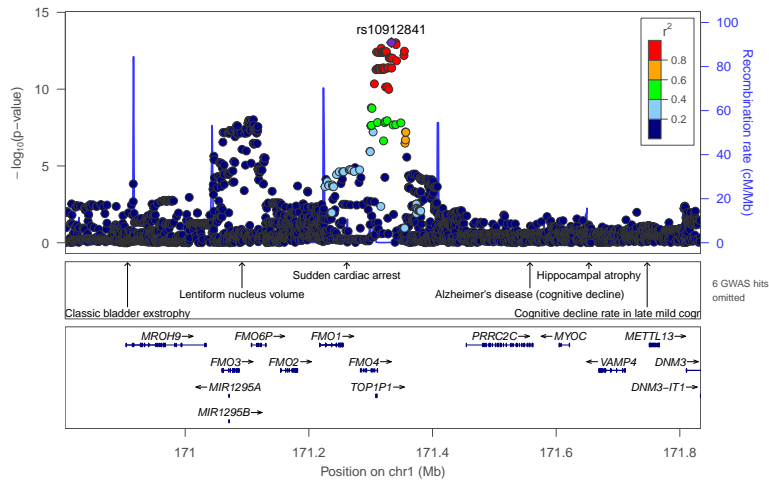

### S(2-carboxyethyl)mercapturic acid

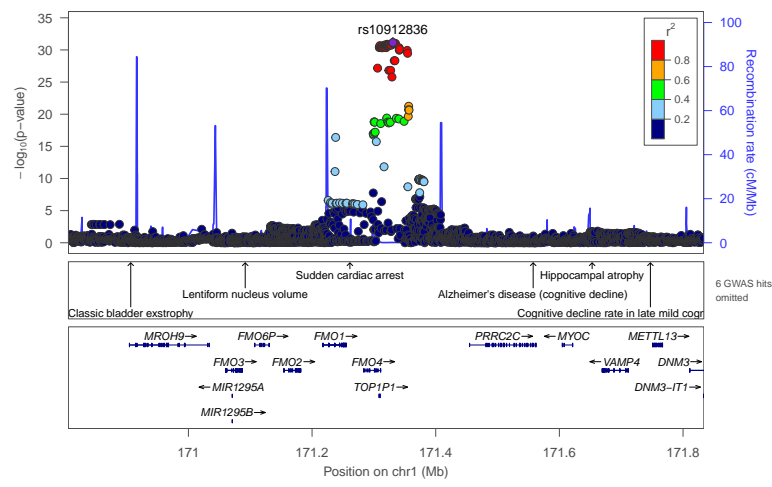

### X - 10457

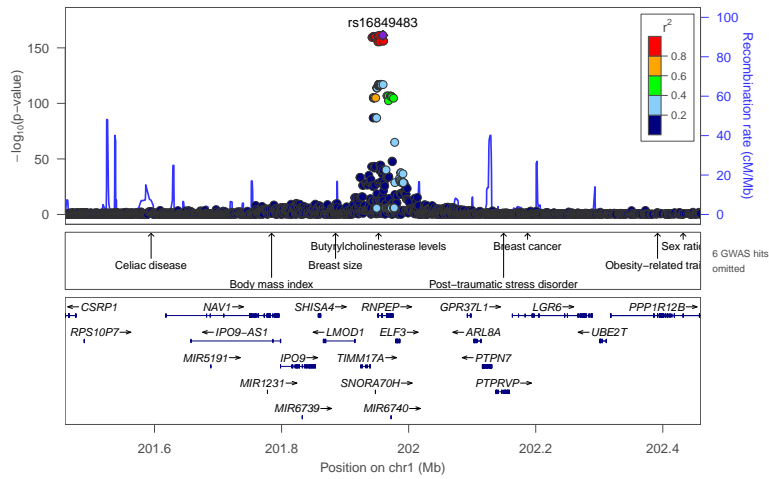

### kynurenate

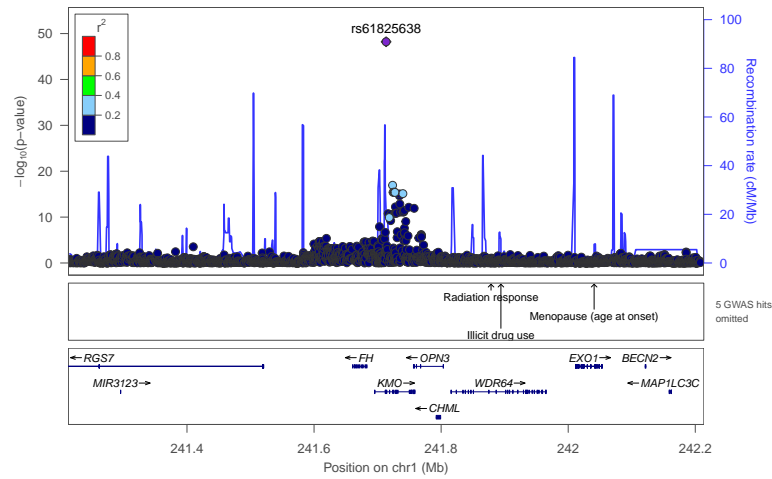

### kynurenine

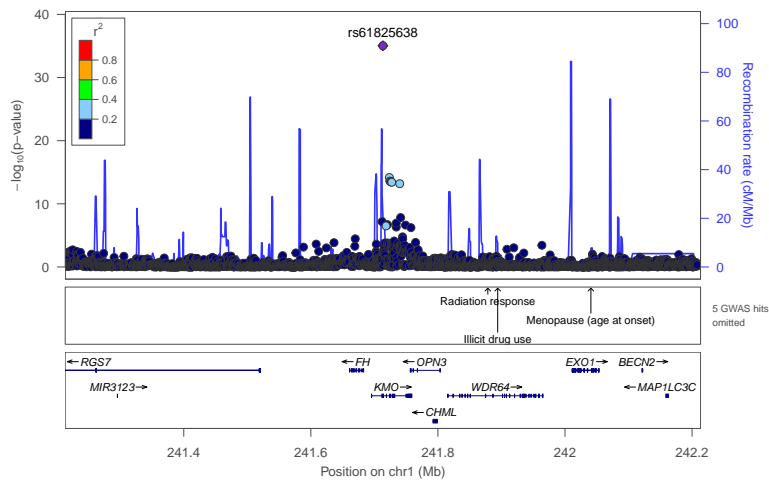

### N-acetylkynurenine (2)

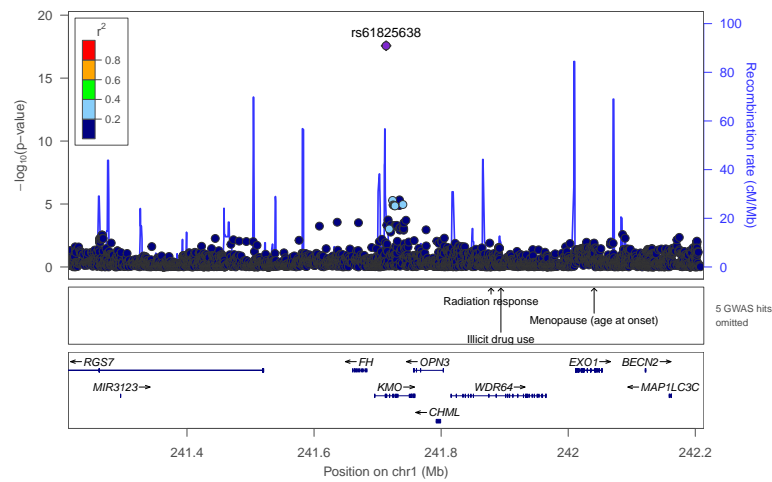



### X – 15503

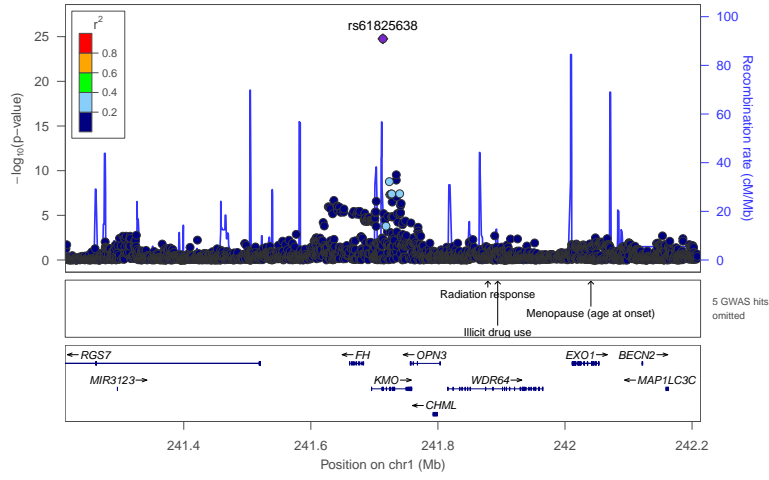

### X – 11470

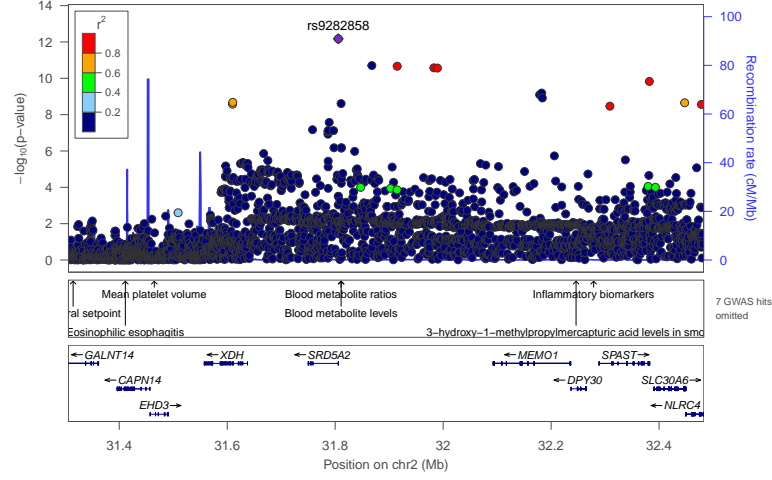

### X – 24494

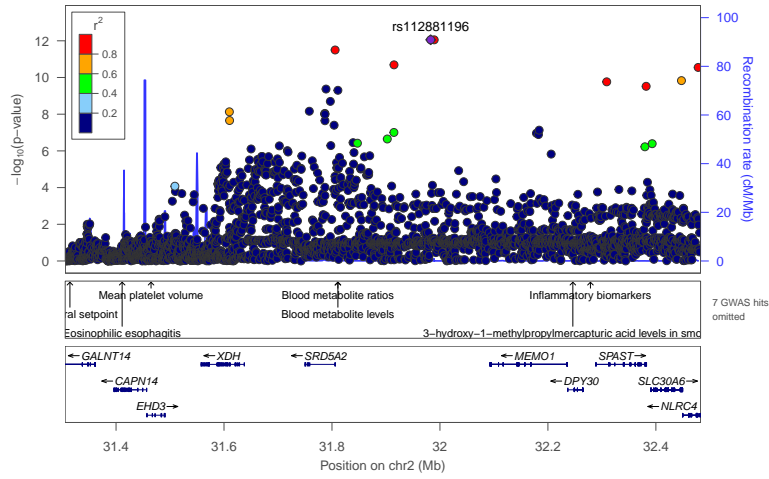

### X – 13684

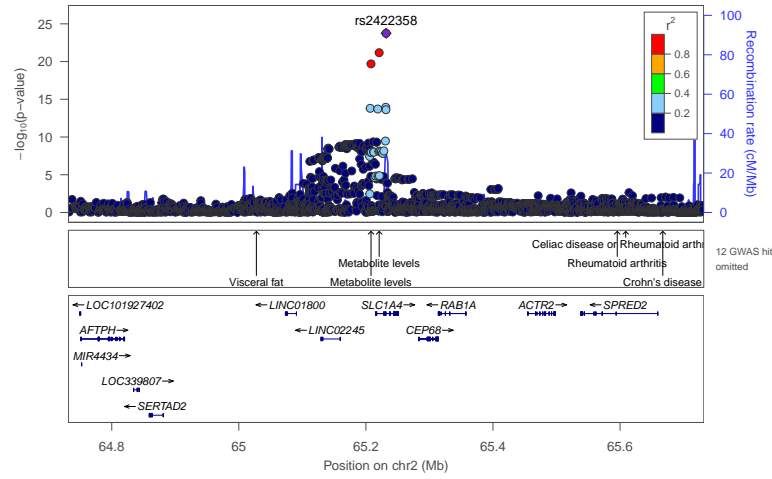

### N-acetylglutamate

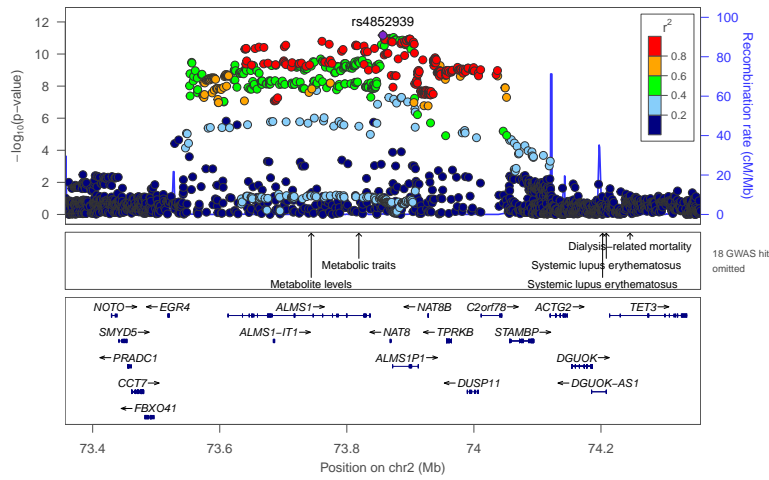

### N-acetyltryptophan

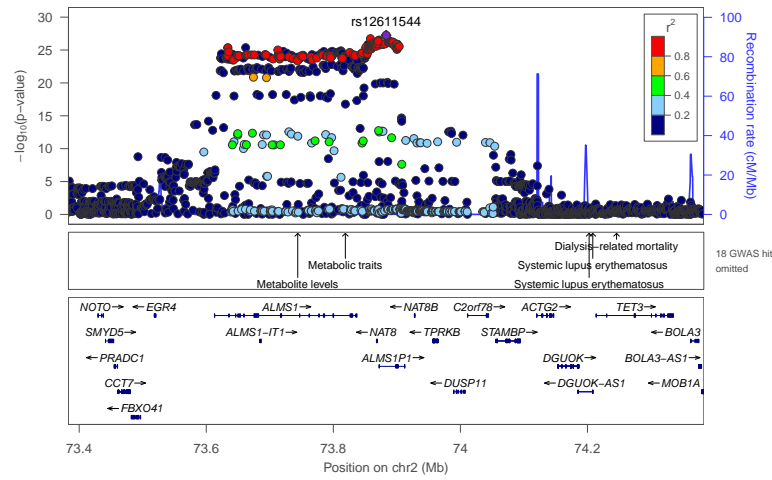

### N-acetyllecucine

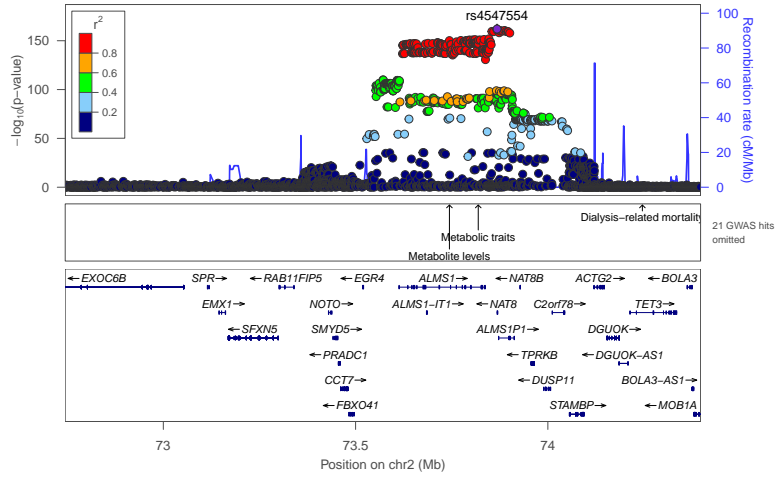

### N-acetylmethionine

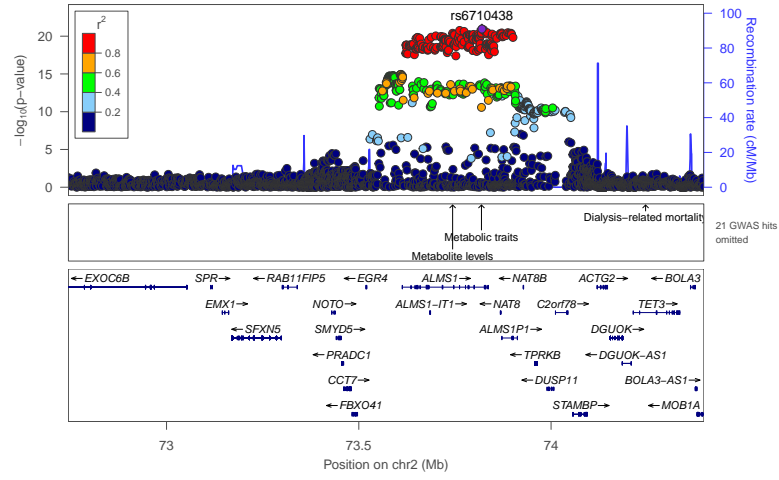

### N-acetylvaline

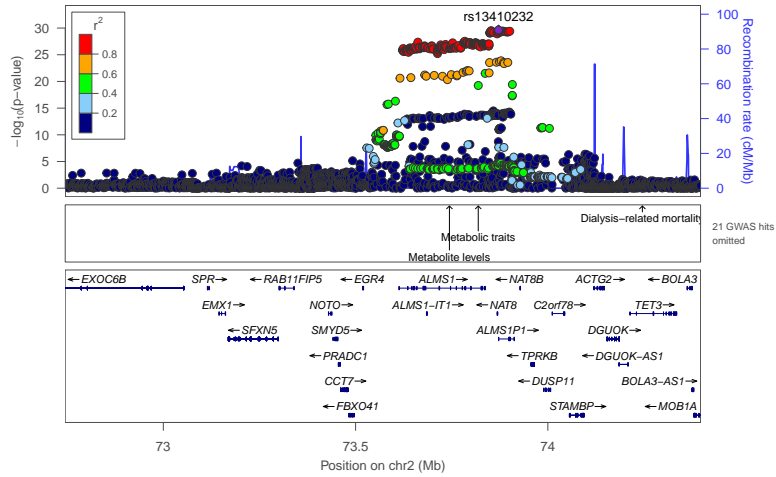

### homocitrulline

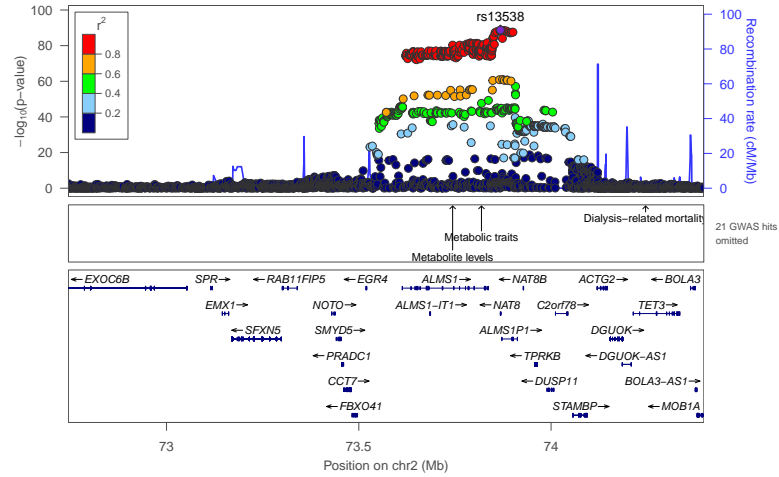

### 1-methylhistidine

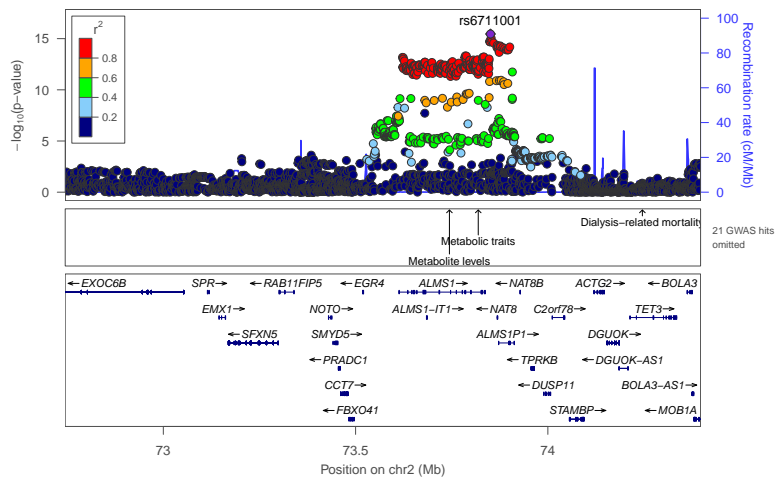

### N-acetyltyrosine

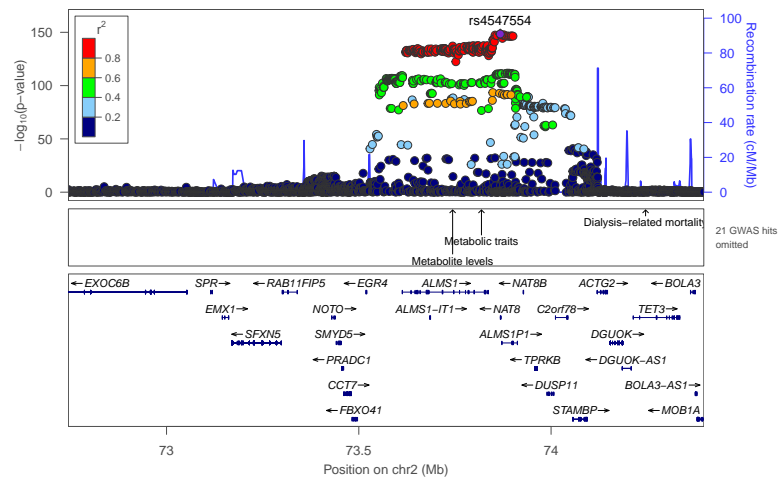

### N-alpha-acetylorntithine

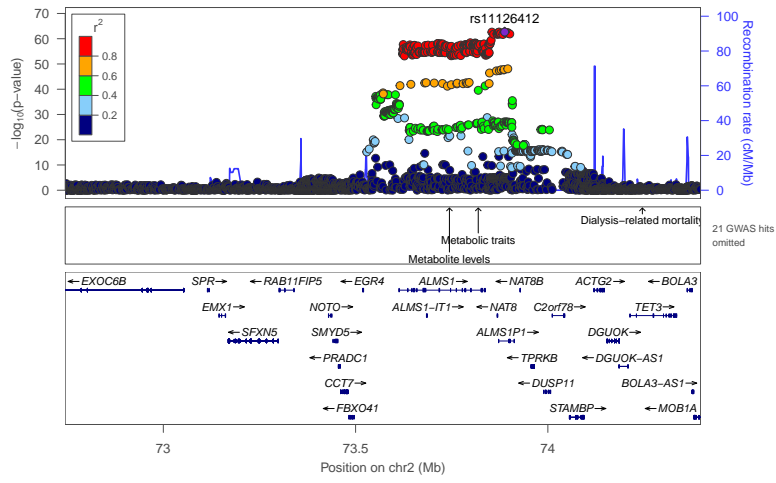

### N-acetylasparagine

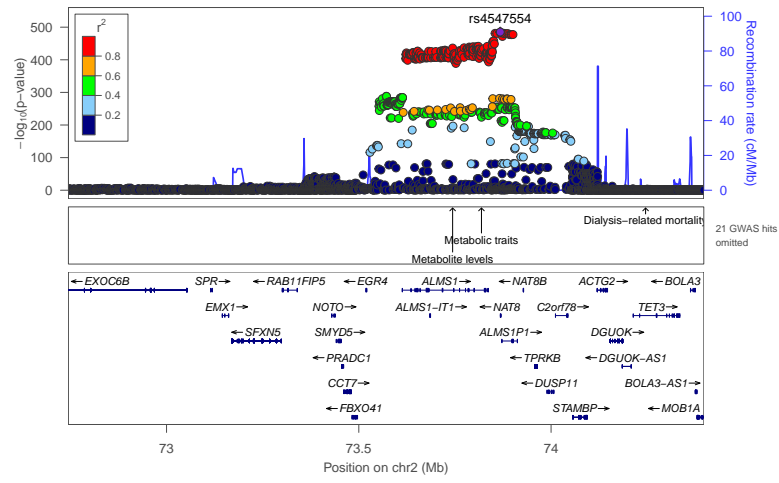

### N-acetylglutamine

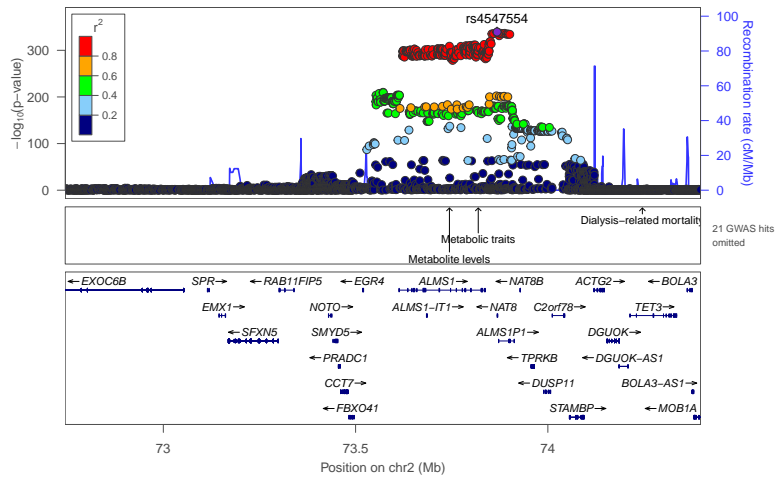

### N-acetylhistidine

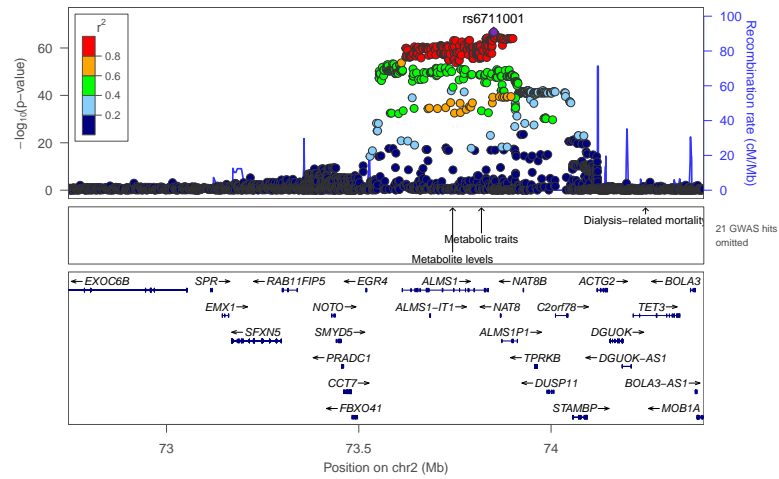

### N-acetylphenylalanine

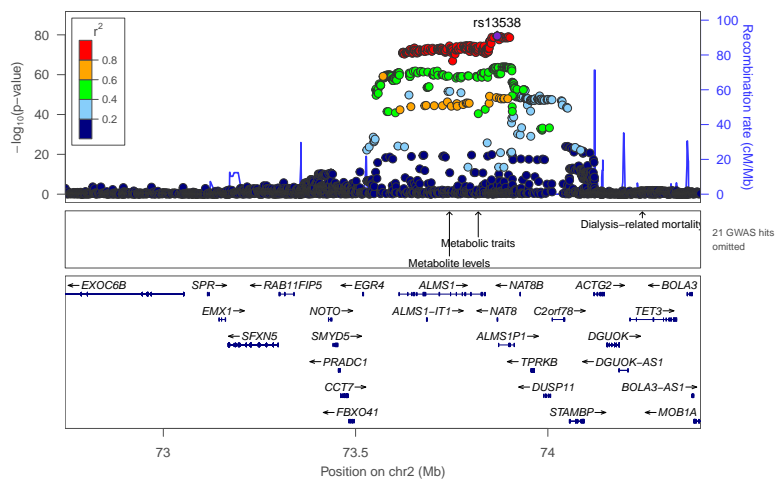

### N-acetylarginine

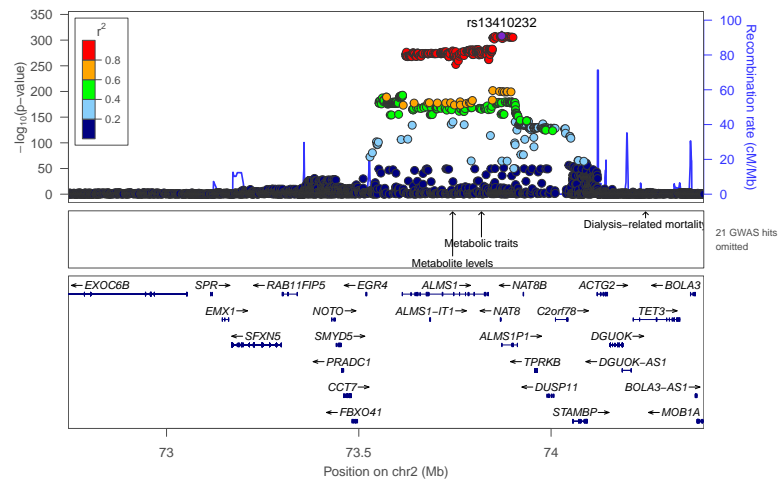

### N2,N2-dimethylguanosine

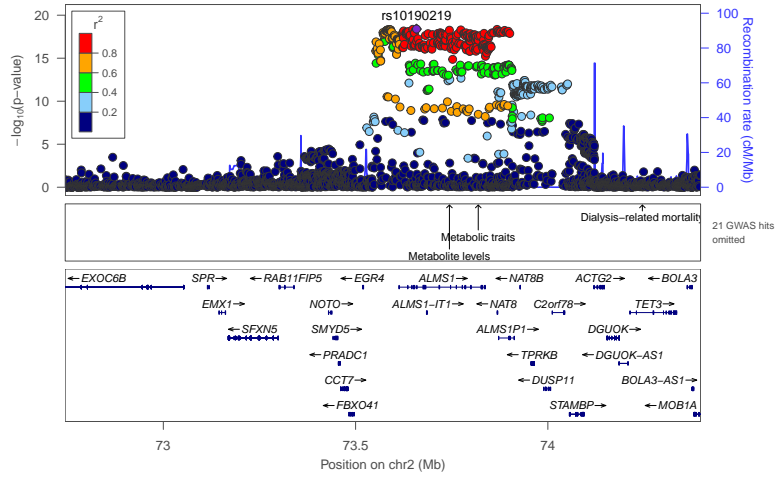

### N2-acetyllysine

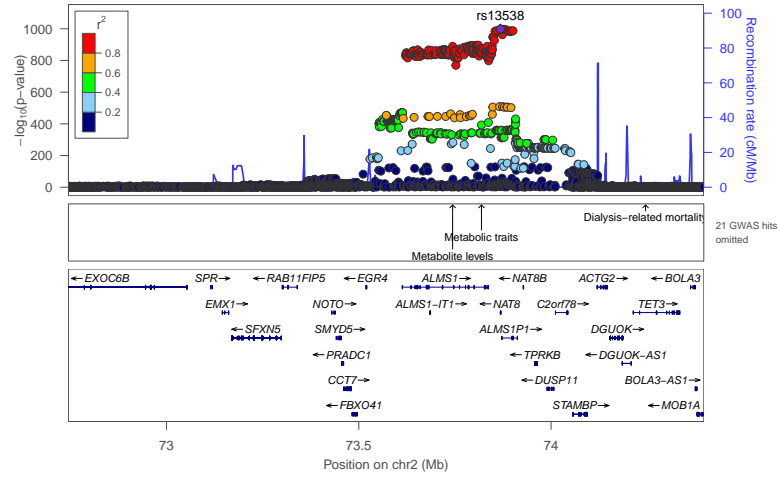

### N6-acetyllysine

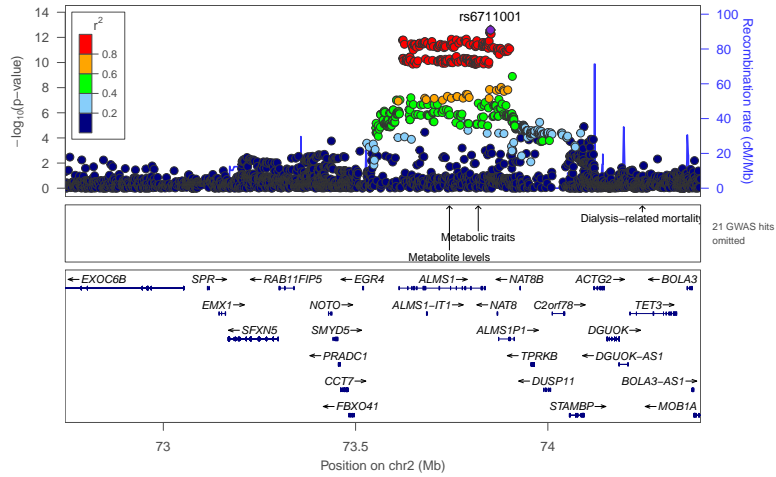

### N6-carboxyethyllysine

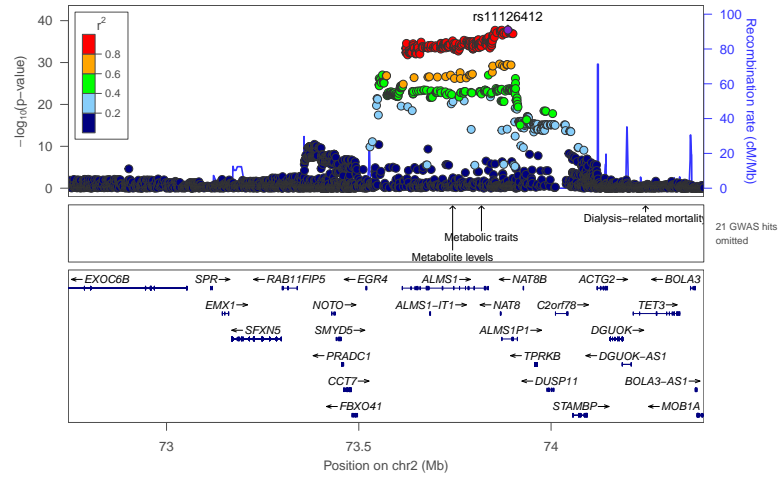

### N-delta-acetylornithine

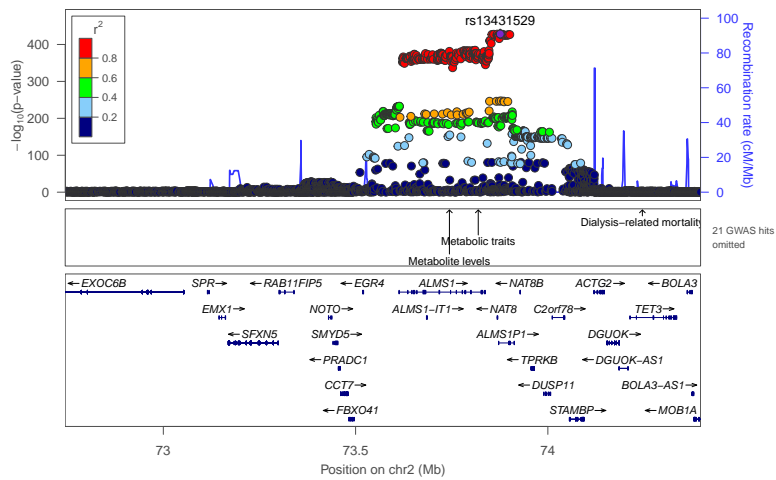

### N-acetyl-1-methylhistidine\*

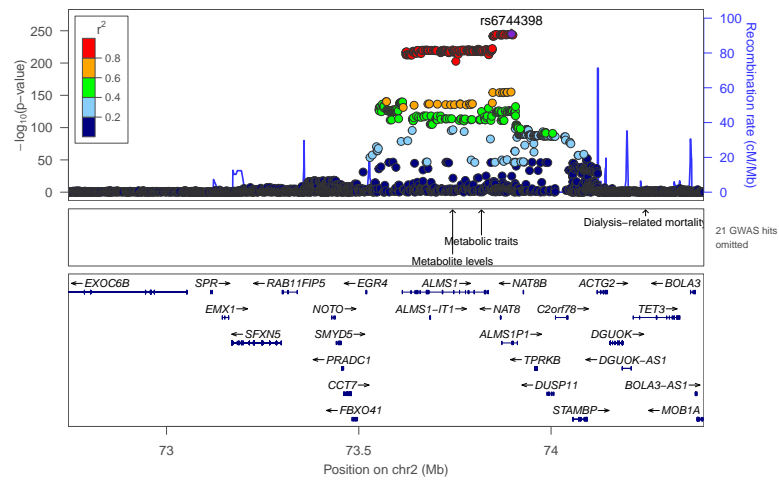

### N-acetyl-3-methylhistidine\*

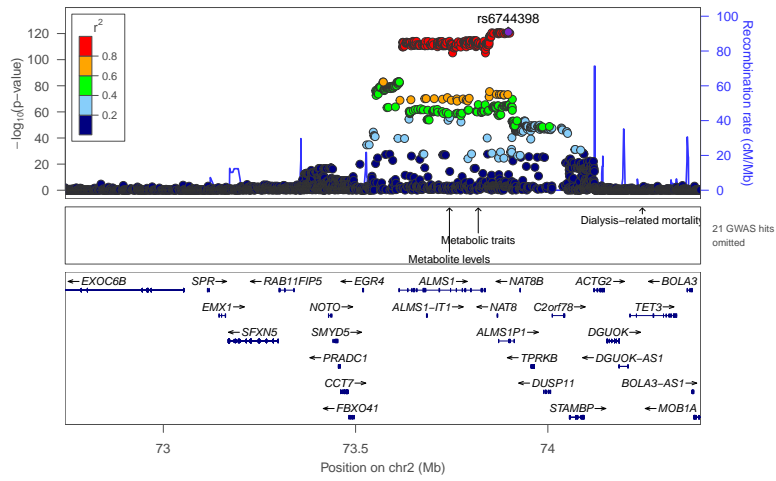

### N2,N5-diacetylornithine

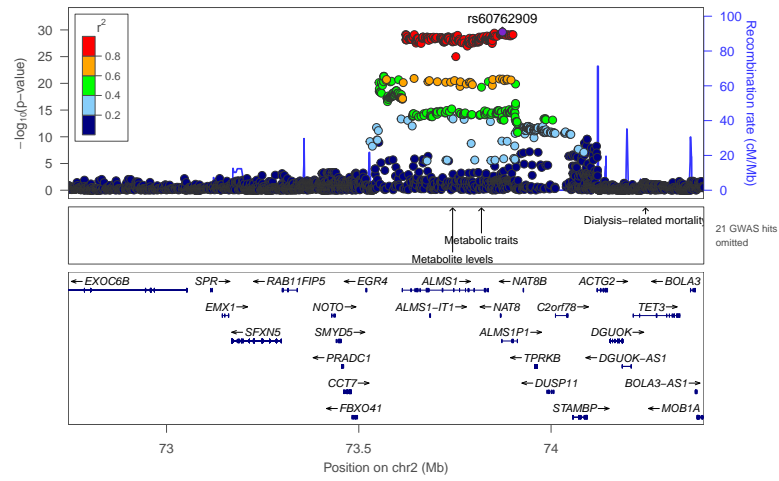

### methionine sulfone

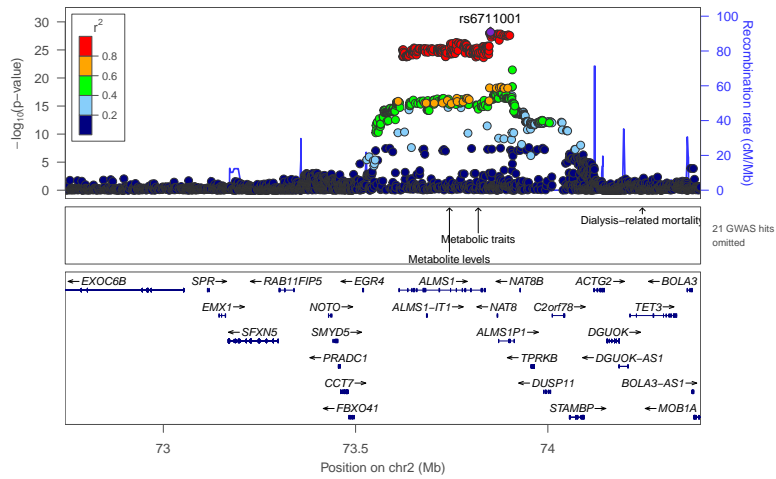

### N-acetylmethionine sulfoxide

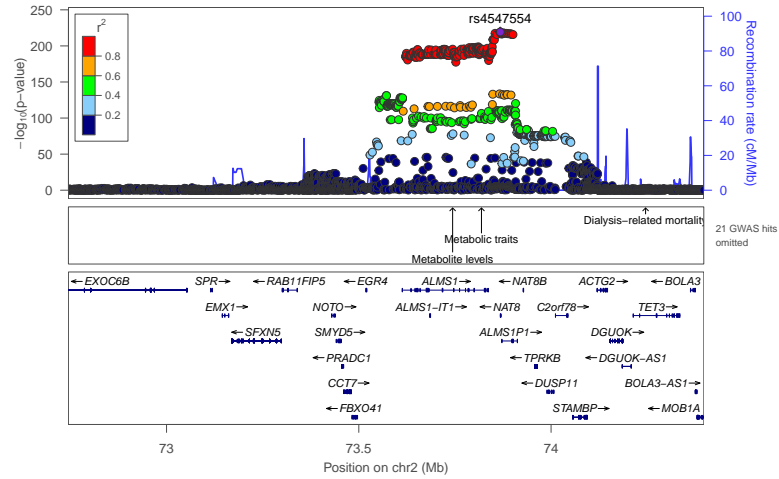

### X - 17365

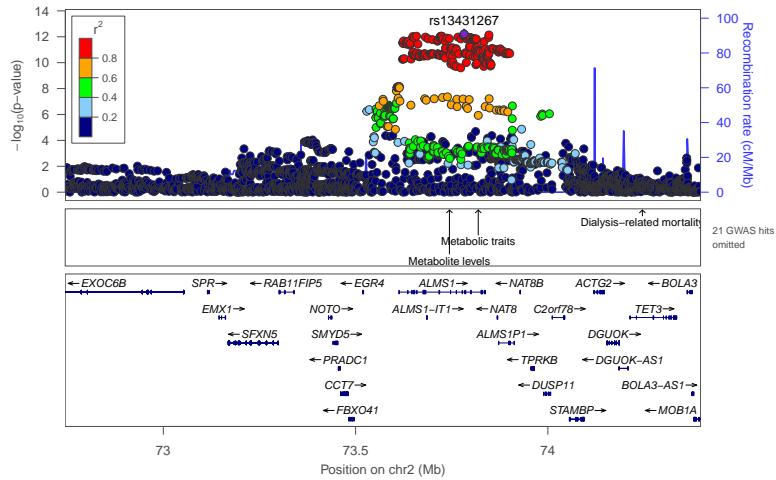

### X - 12379

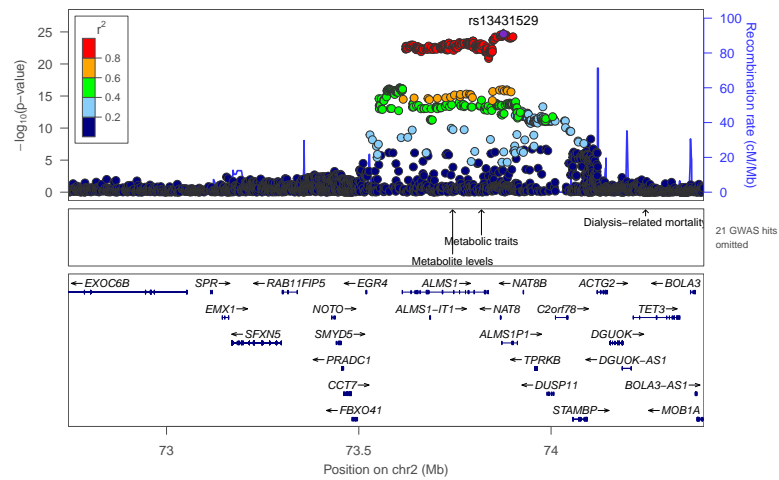



X - 12125

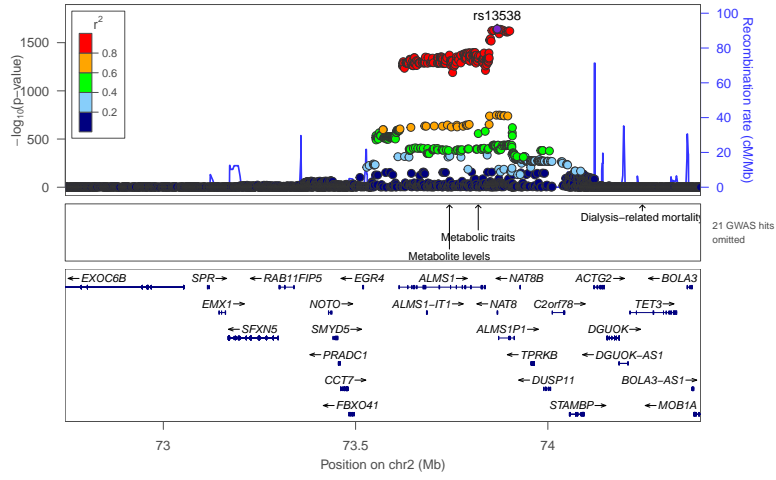

X - 12124

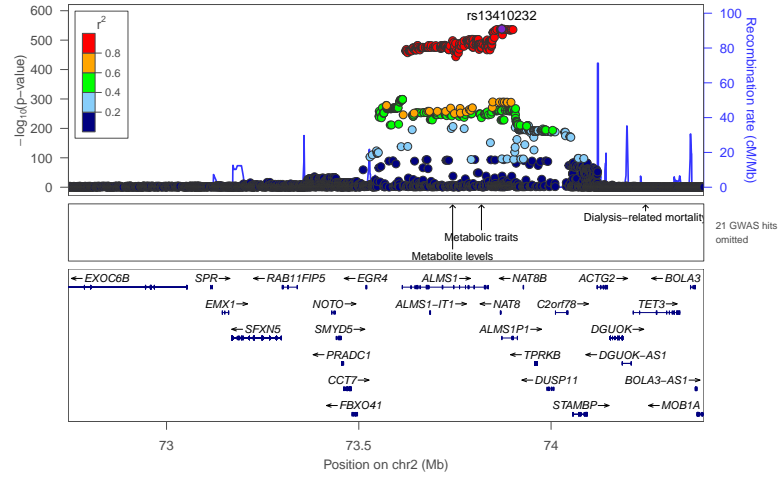

X - 12753

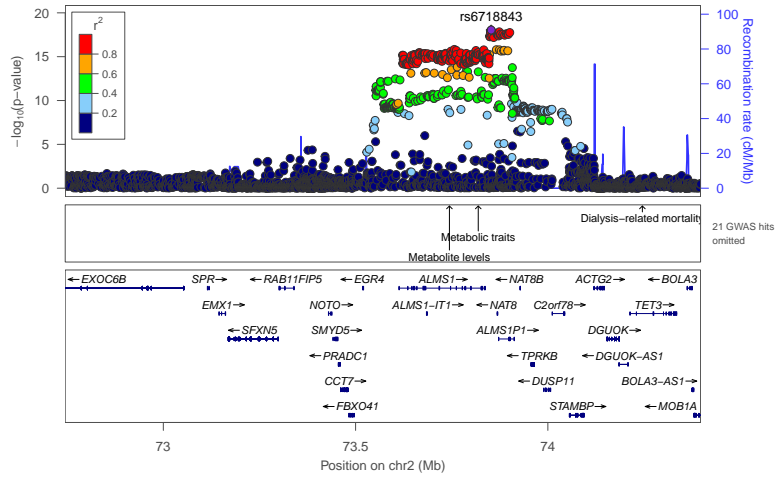

oxindolylalanine

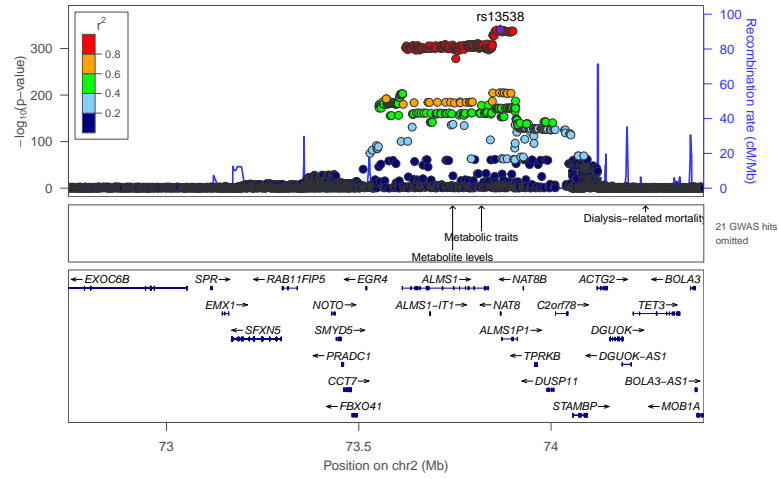

pyrraline

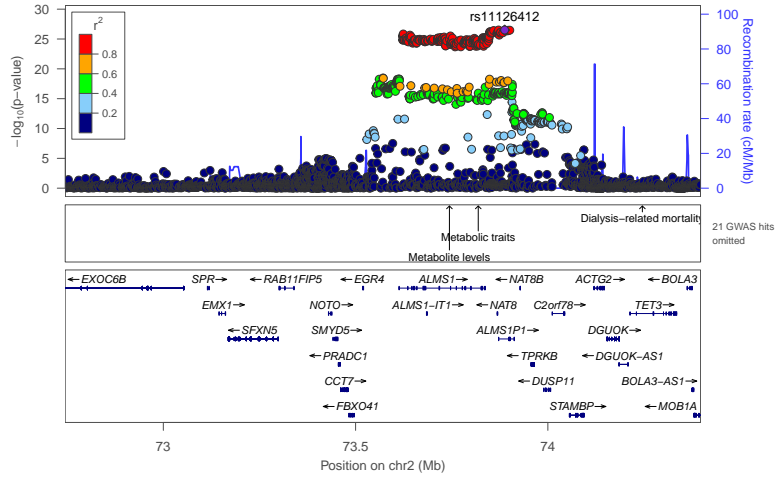

N-acetylcitrulline

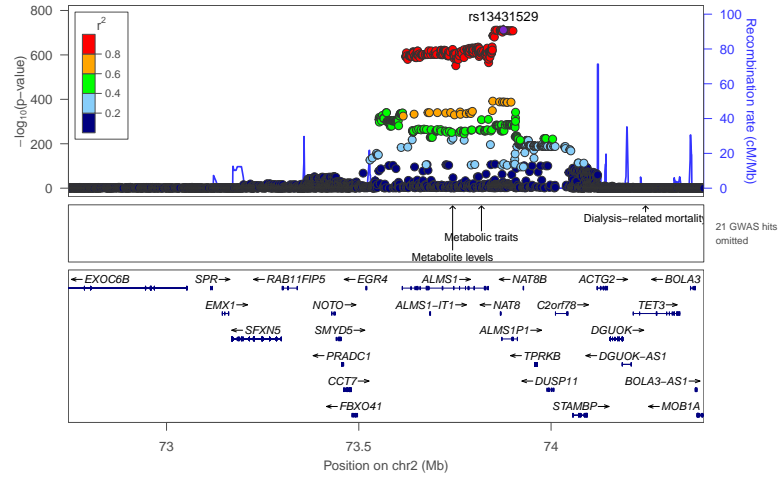

### N-acetylpyrraline

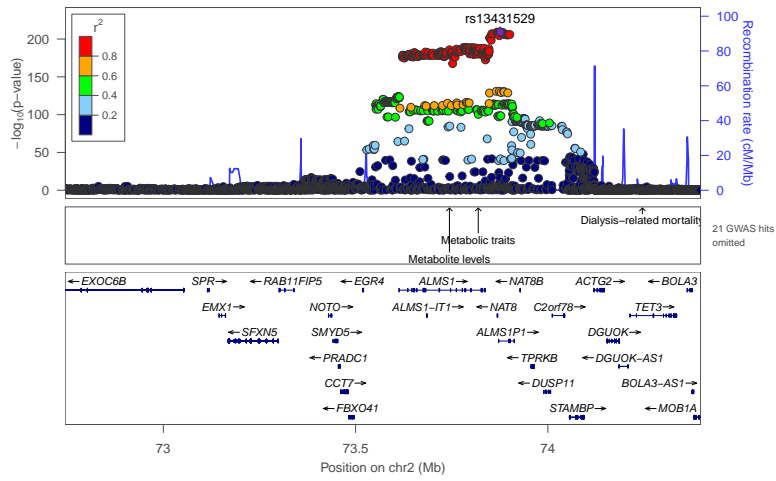

### N2,N6-diacetyllysine

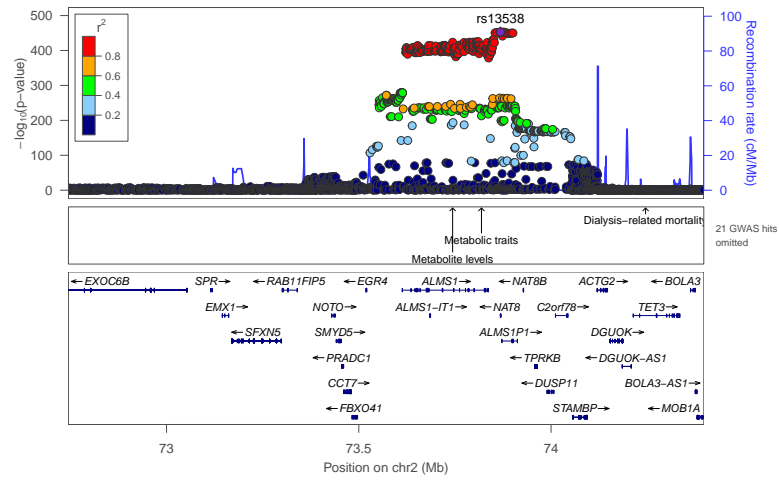

### N-acetylkynurenine (2)

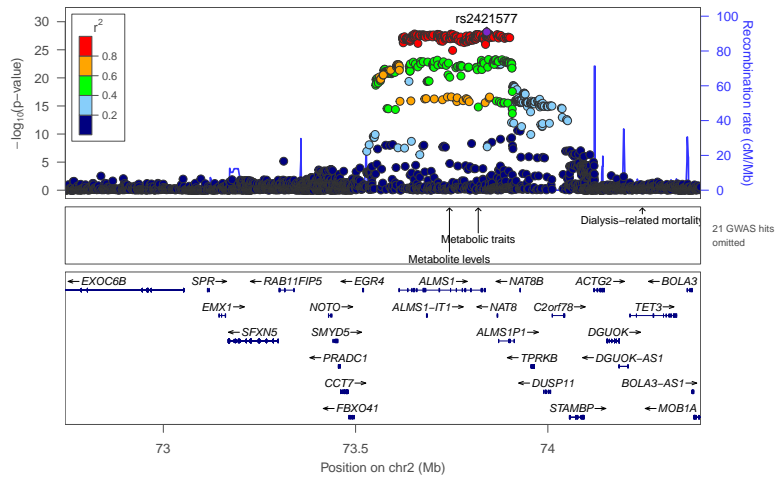

### X - 23423

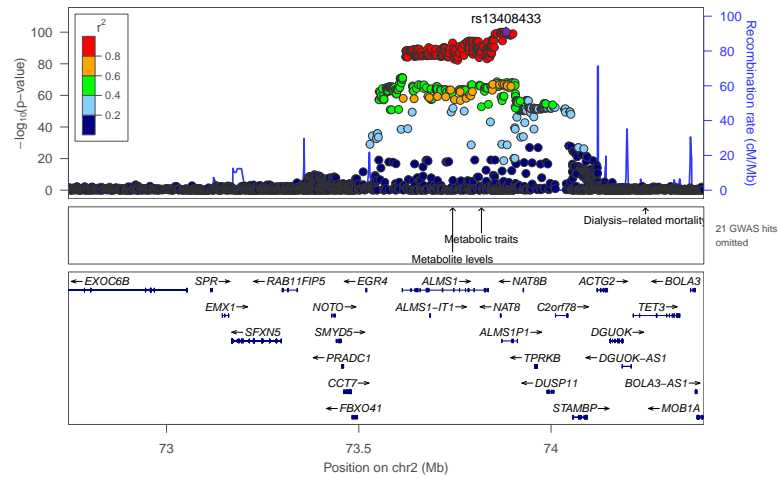

### N-acetyl-L-2-aminoadipic acid

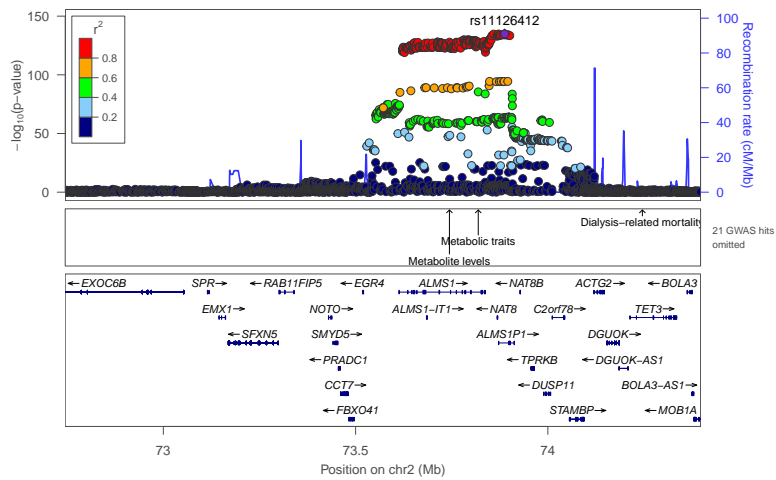

### X - 13698

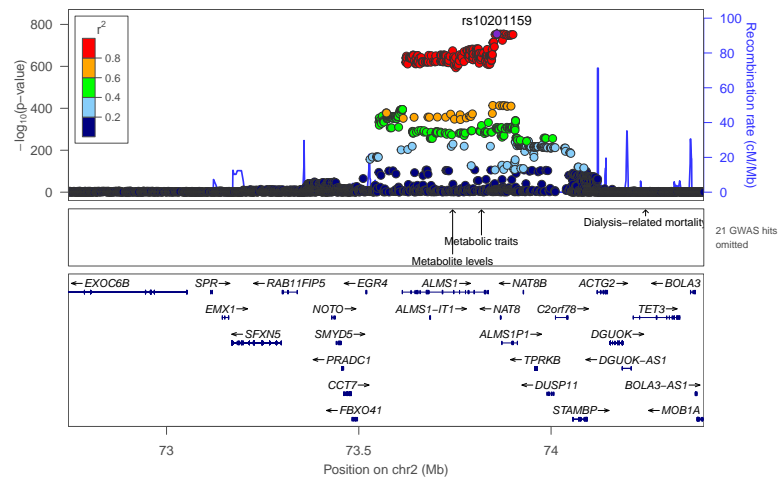

### X – 24519

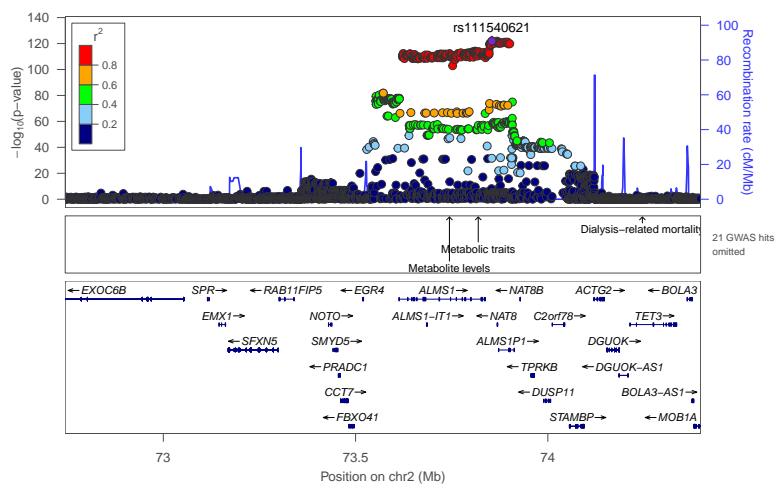

### N2-acetyl,N6,N6-dimethyllysine

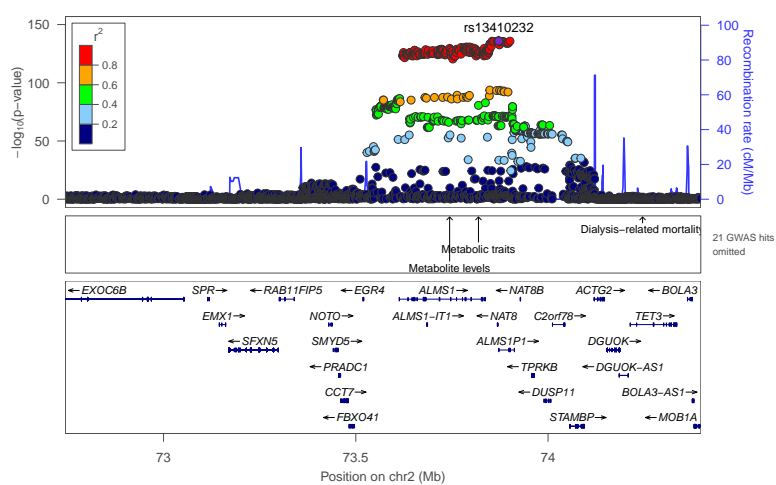

### S(2-carboxyethyl)mercapturic acid

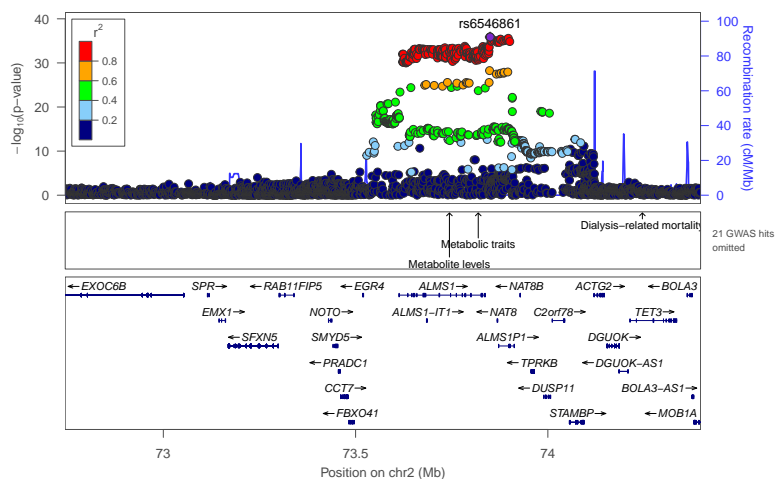

### N-acetyl-2-aminooctanoate\*

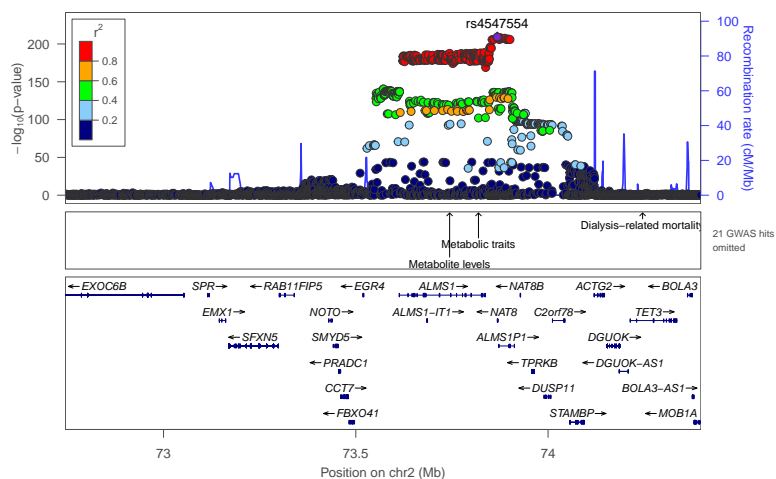

### 3-S-cysteinyl-2-methylpropanoate\*

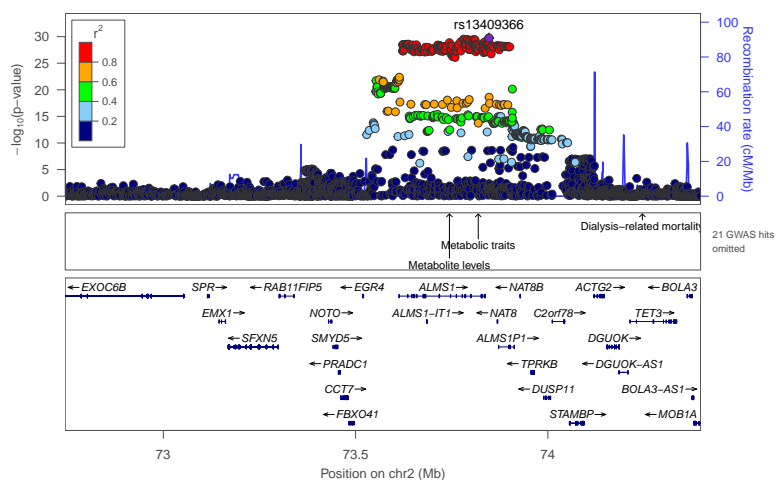

### N-acetylhomocitrulline

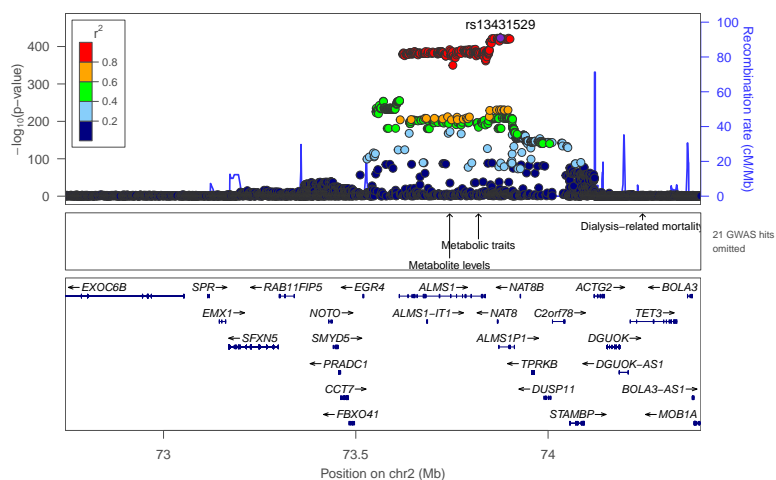

### N,N-dimethyl-5-aminovalerate

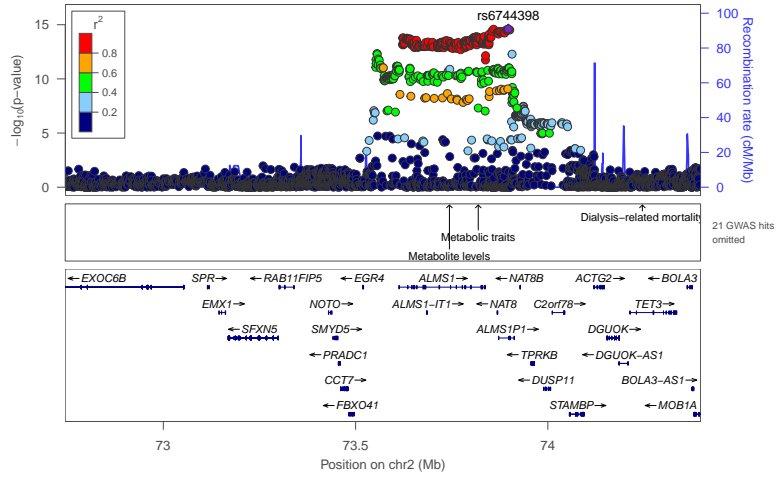

### N2-acetyl,N6-methyllysine

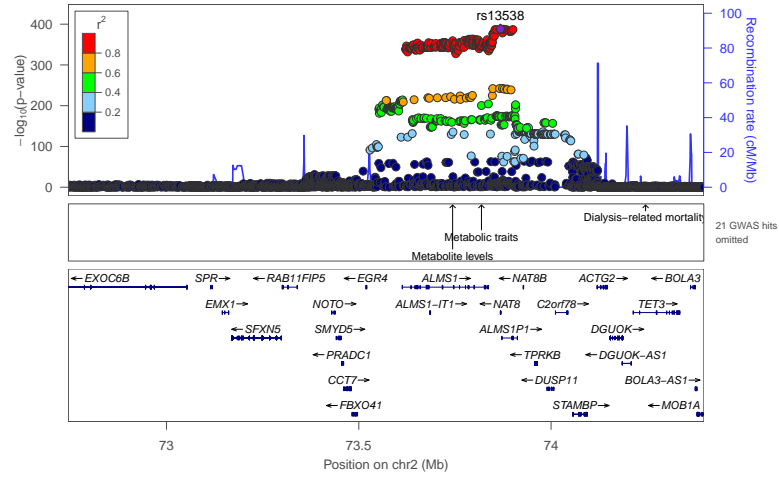

### quinolinate

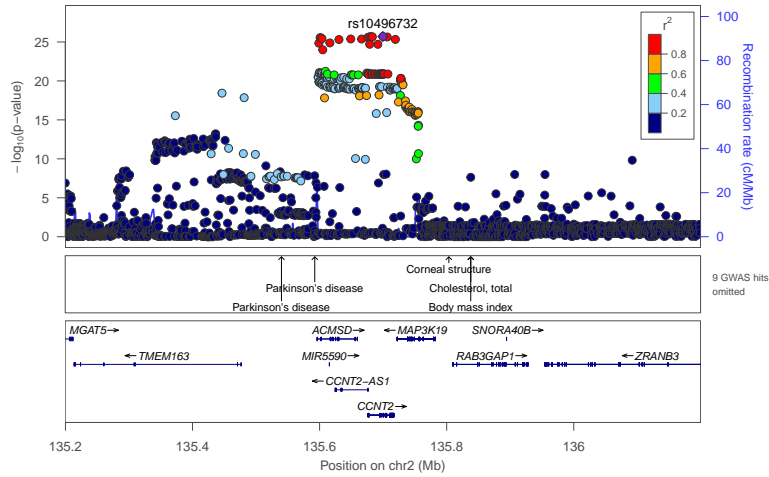

### X - 12722

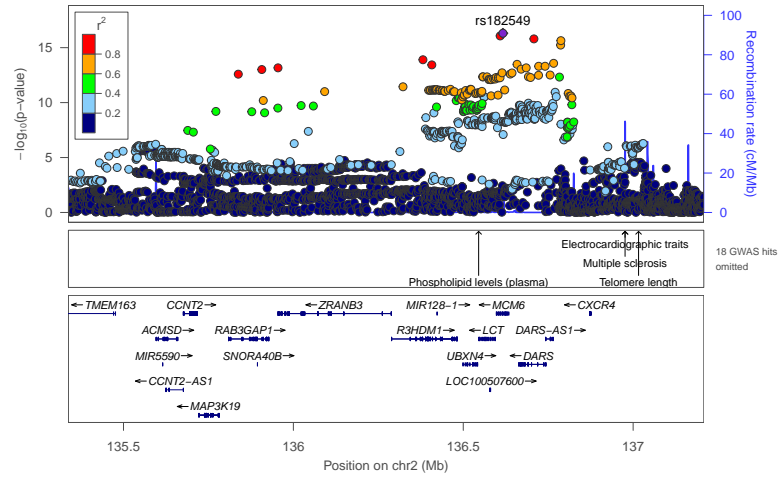

### X - 23331

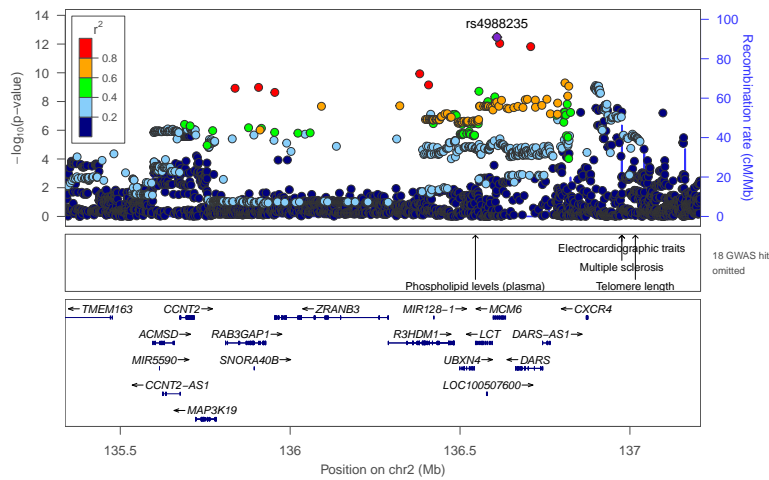

### lactose

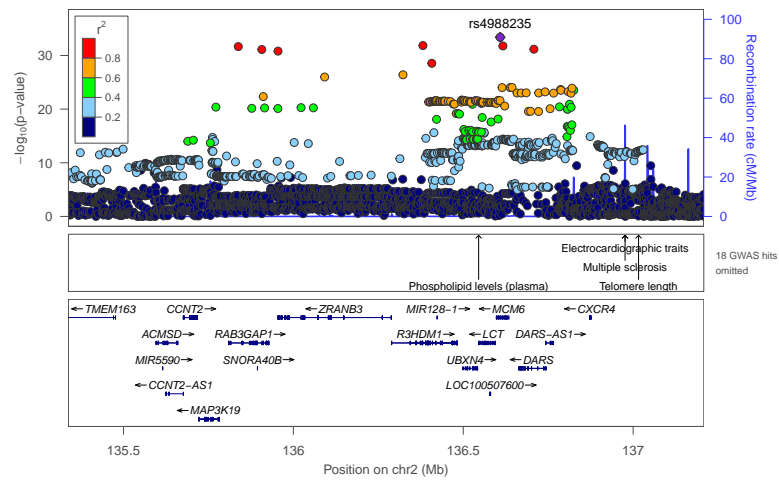

### galactosylglycerol

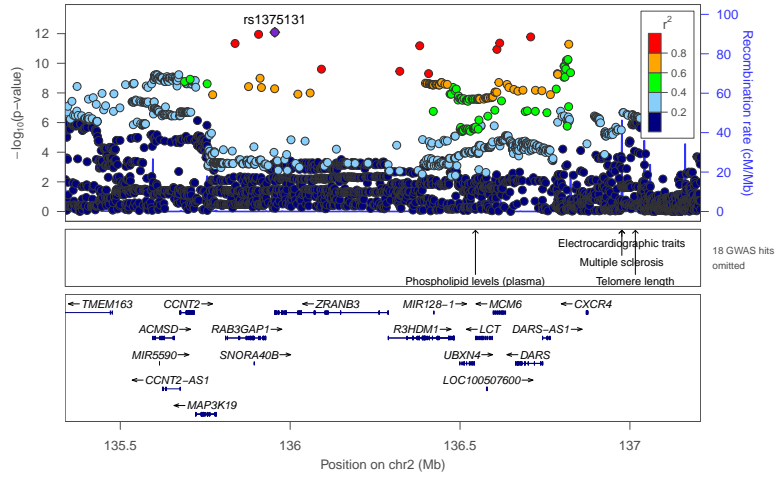

### X - 15503

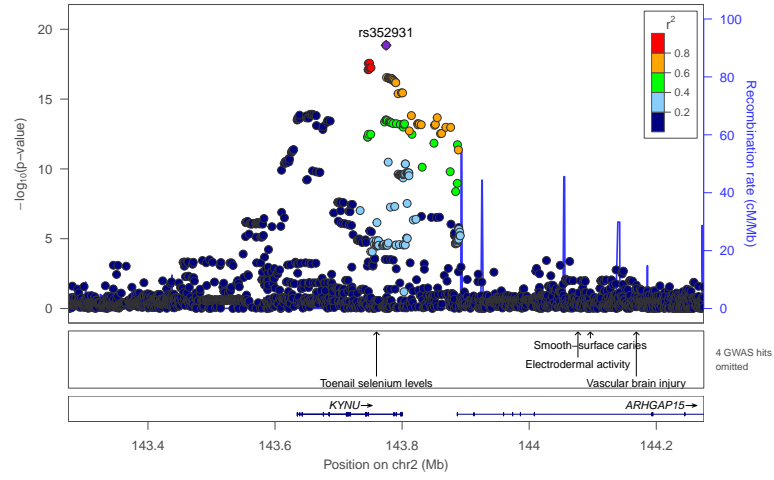

### methylmalonate (MMA)

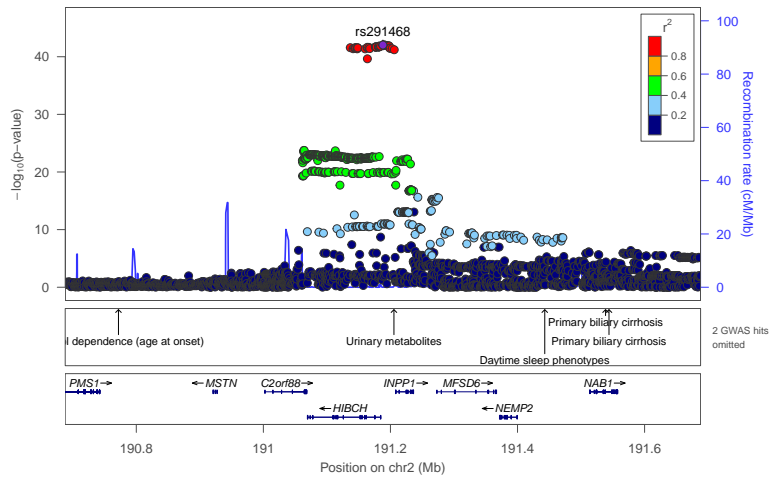

### hydantoin-5-propionate

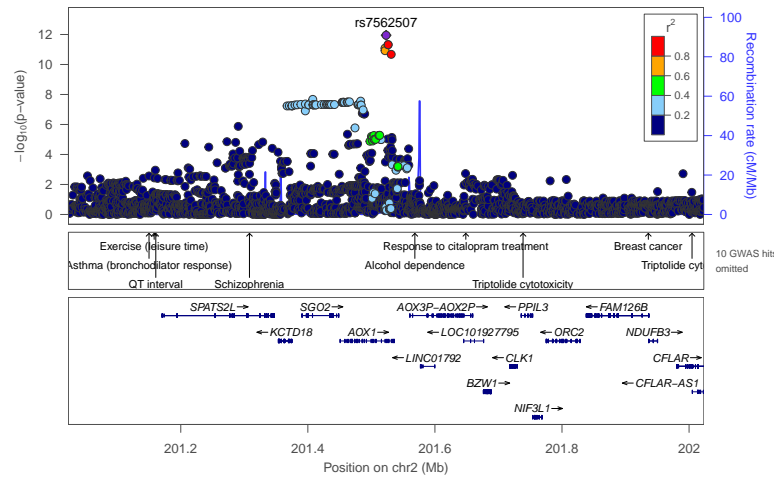

### tigloylglycine

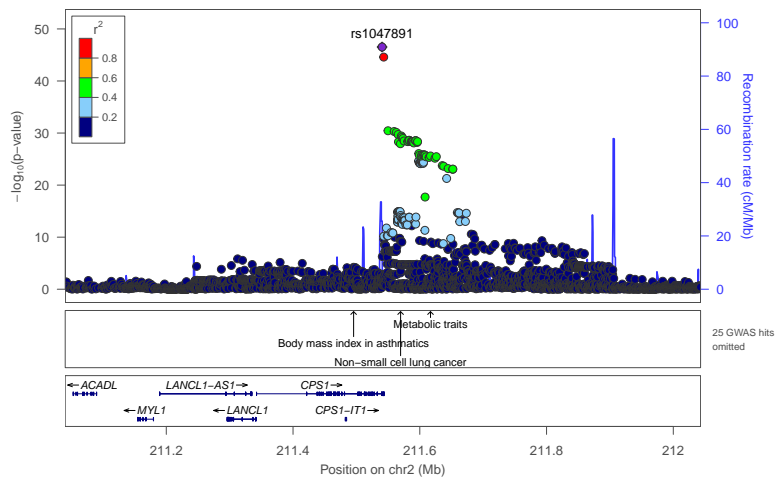

### 2-methylbutyrylglycine

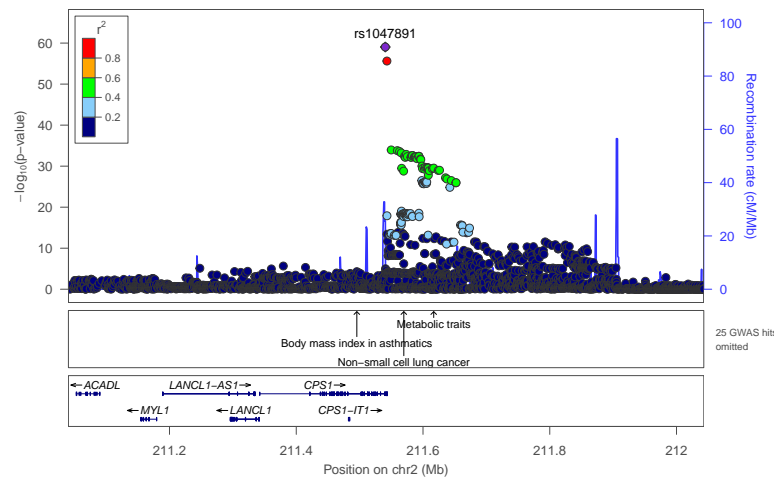



### 3-methylcrotonylglycine

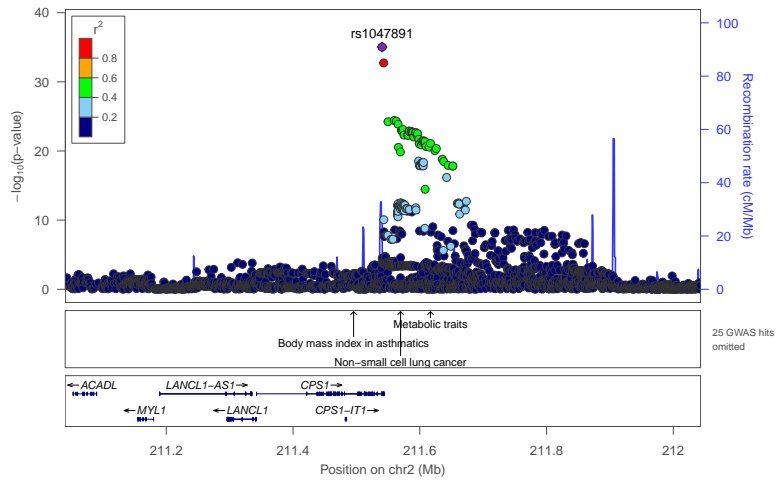

### isovalerylglycine

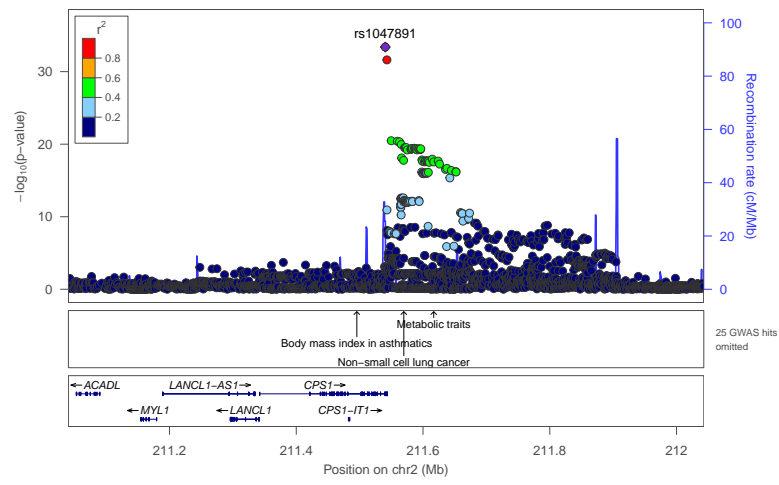

### phenylpropionylglycine

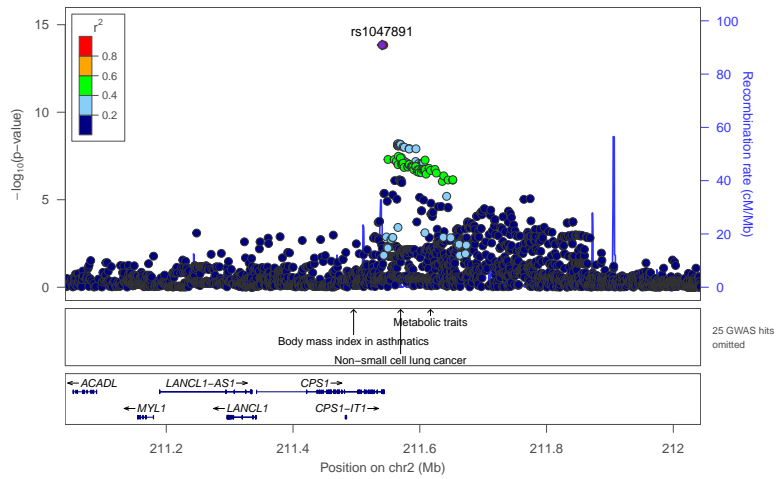

### hexanoylglycine

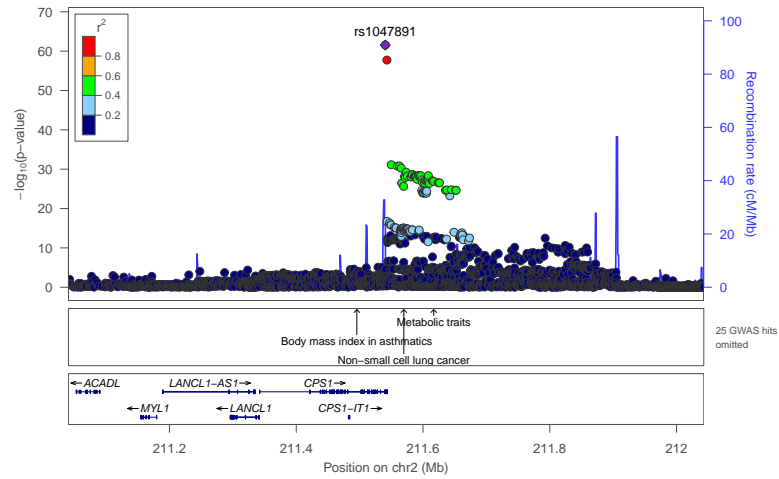

### isobutyrylglycine

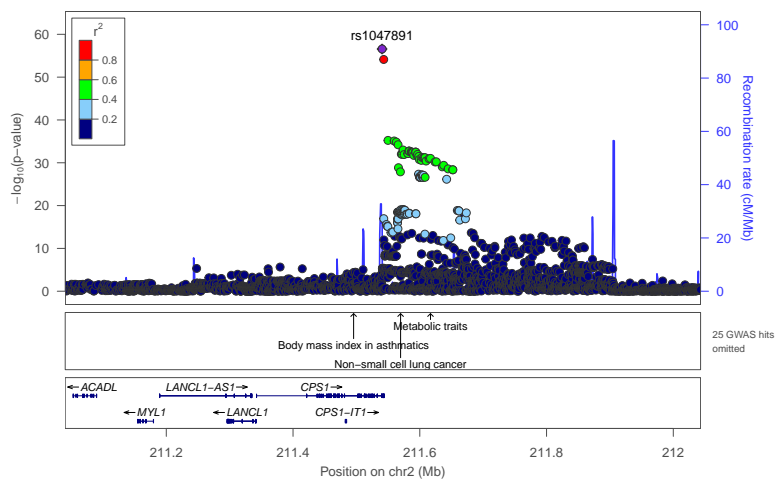

### 3-methylglutaconate

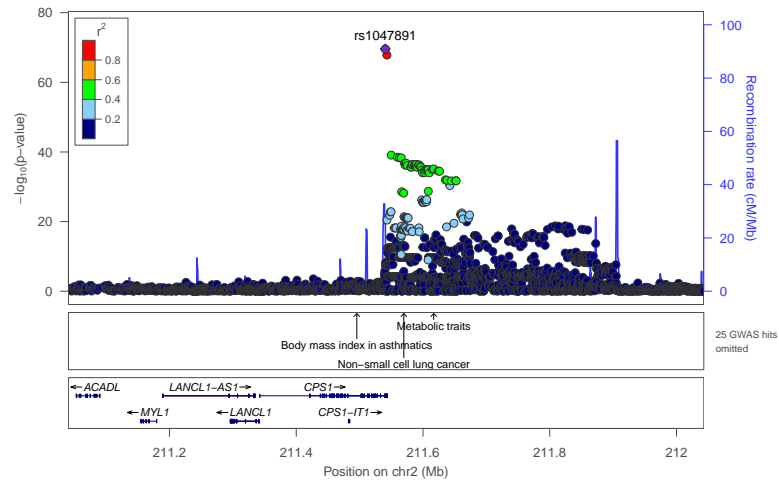

### 3-methylglutaryl carnitine (2)

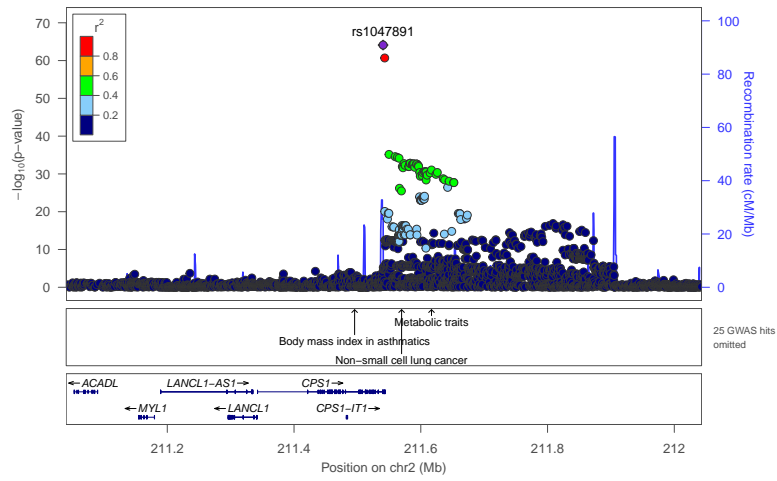

### X - 17325

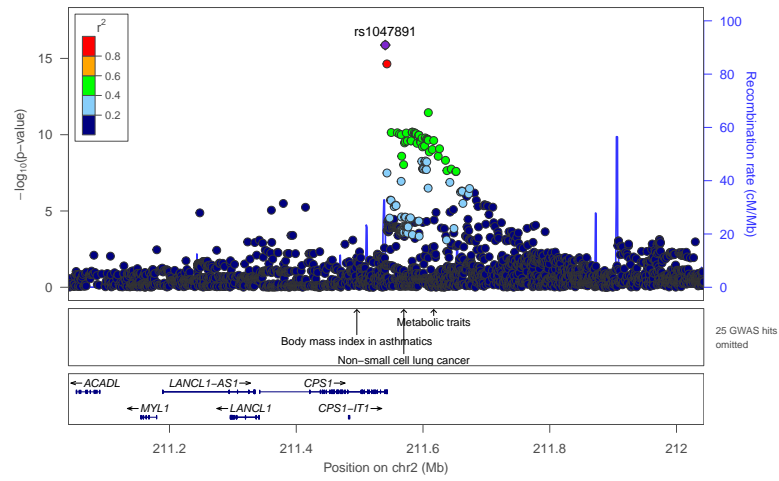

### X - 17367

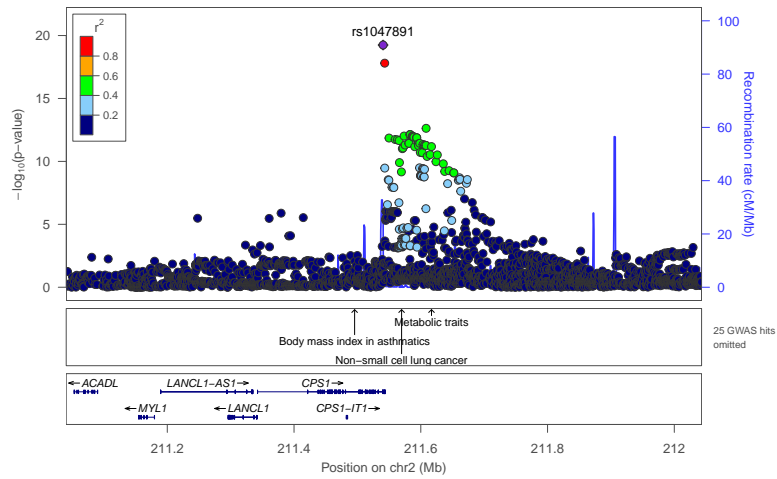

### cis-3,4-methyleneheptanoylglycine

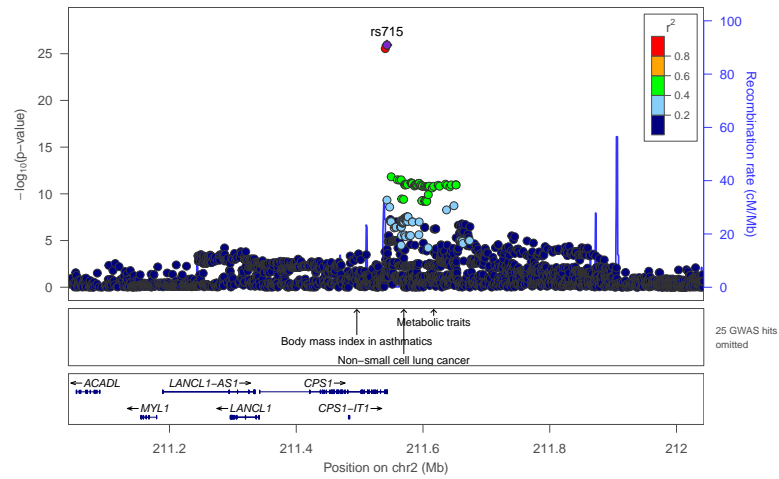

### 3-hydroxyoctanoyl glycine

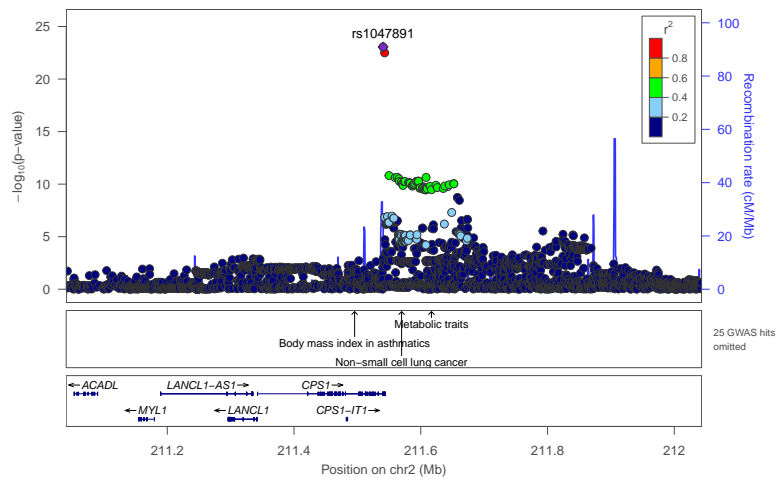

### glycine conjugate of C6H10O2 (1)\*

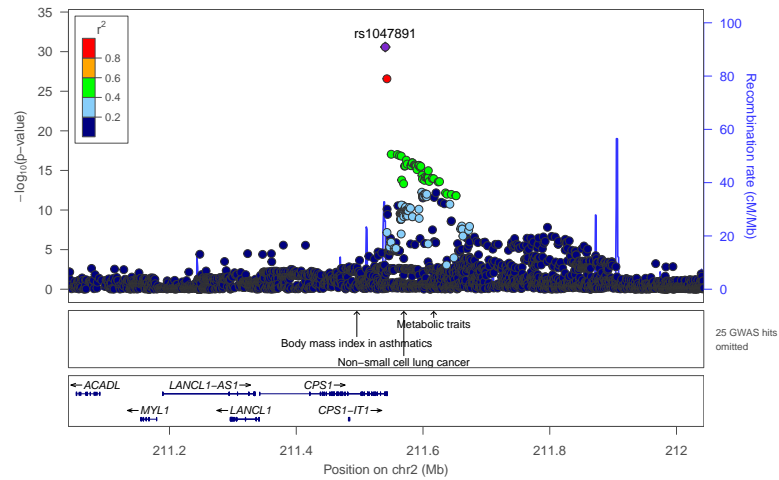

X - 24406

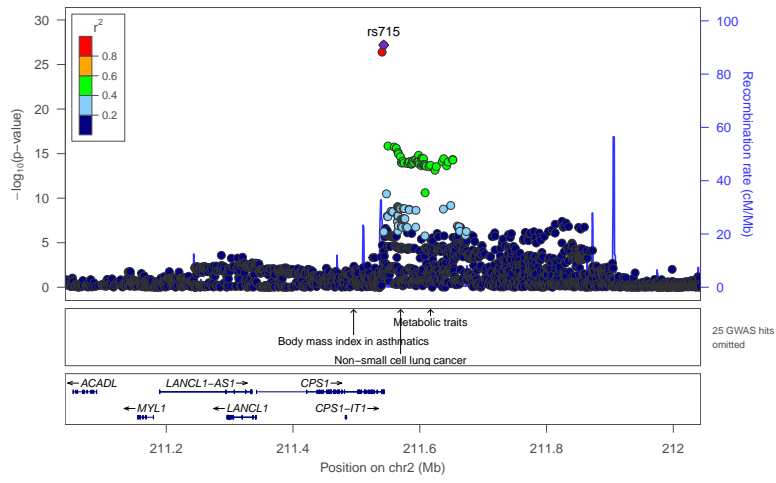

X - 24465

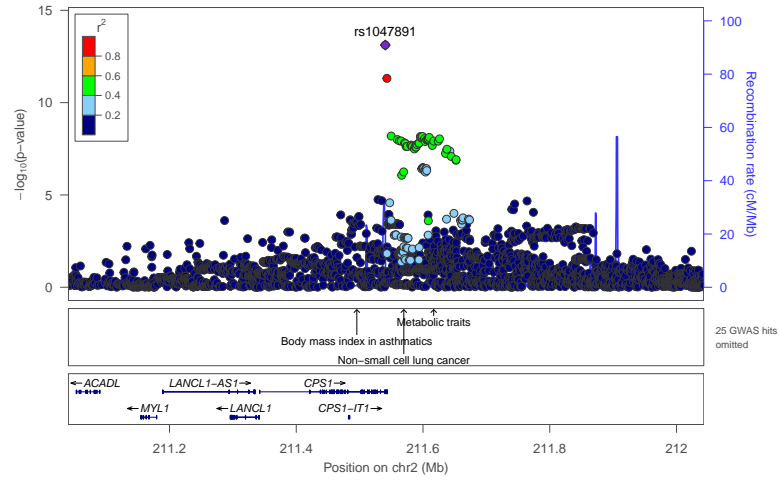

2-methylserine

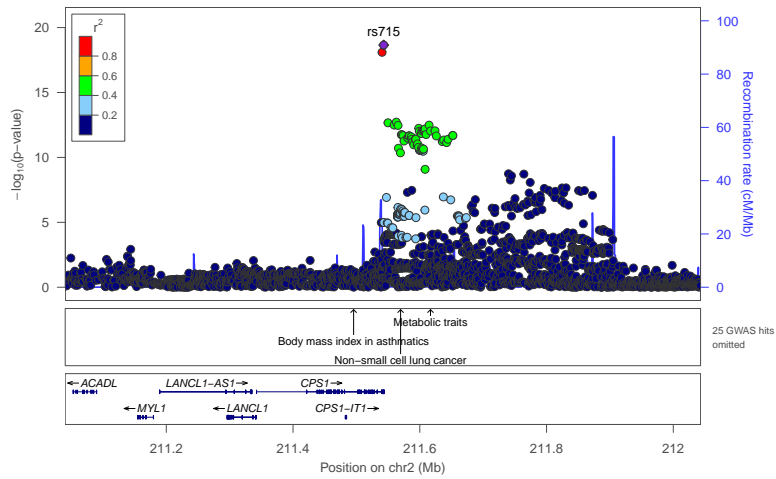

3-methylglutarate/2-methylglutarate

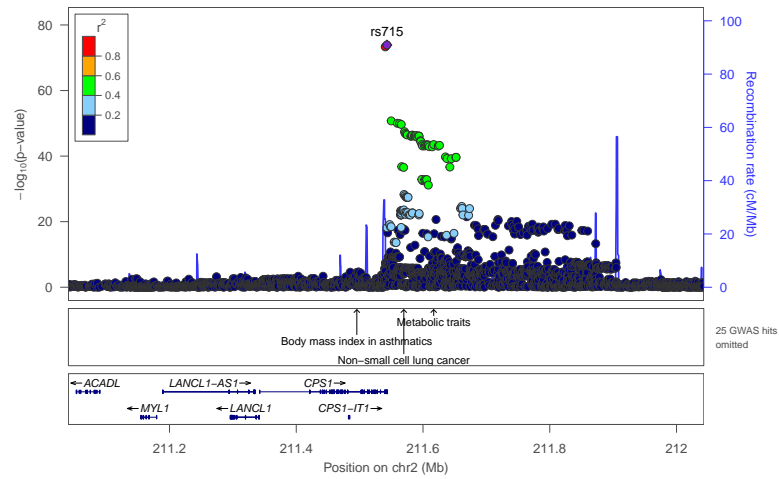

indolepropionylglycine

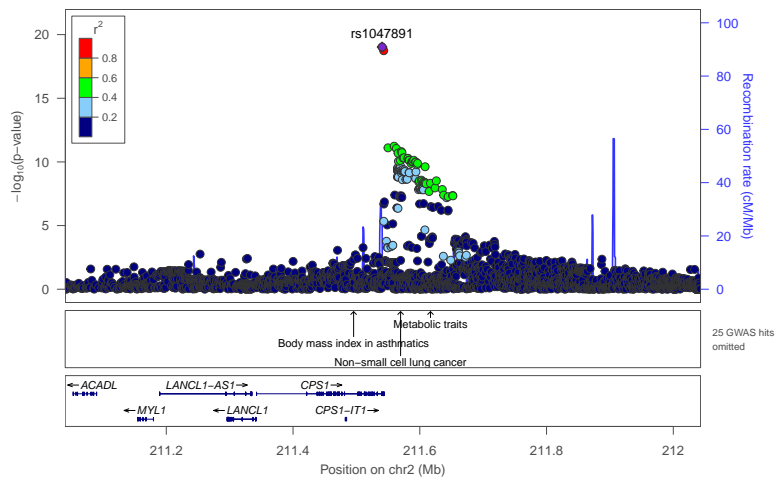

trans-3,4-methyleneheptanoylglycine

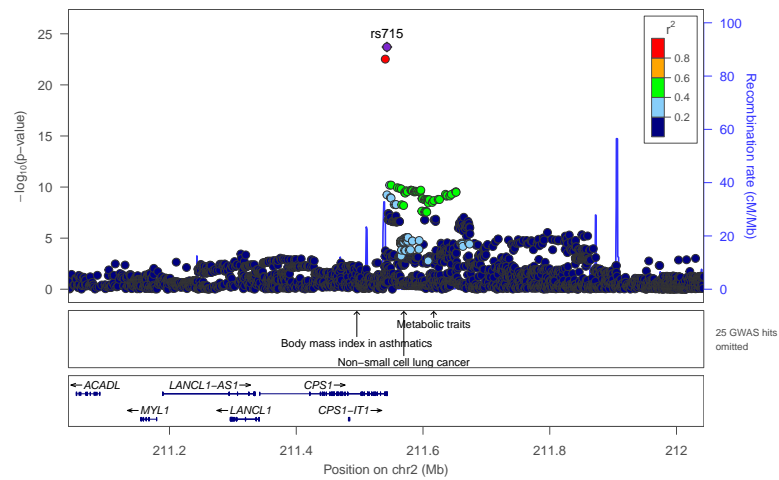

### glycine

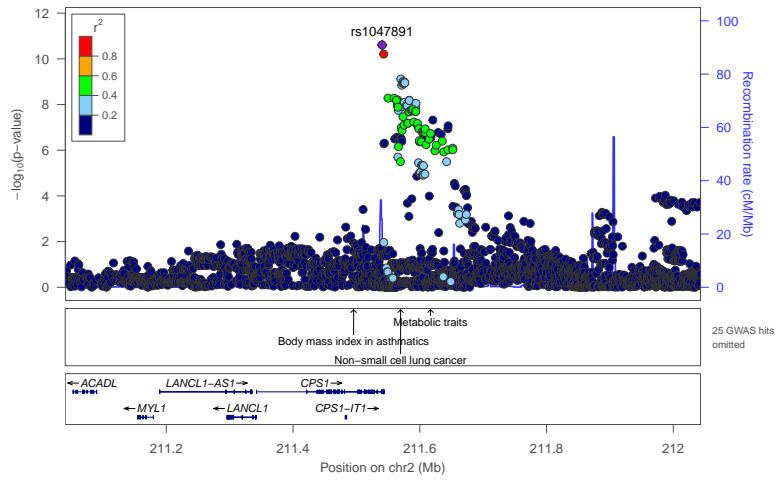

### 2-butenoylglycine

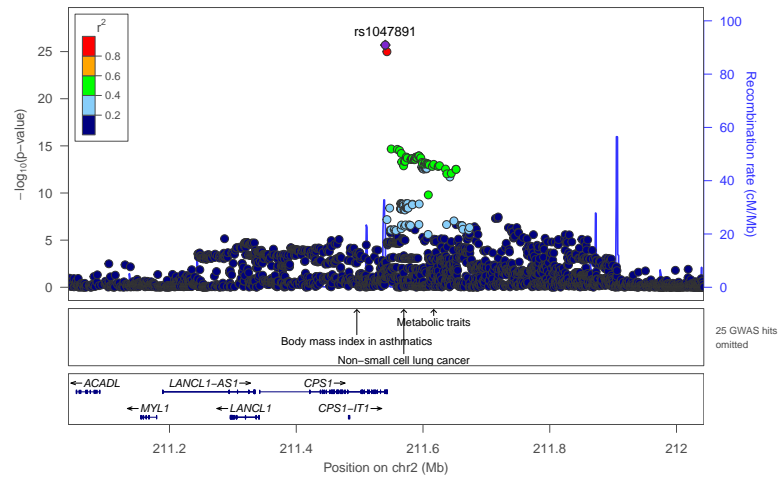

### isocaproylglycine

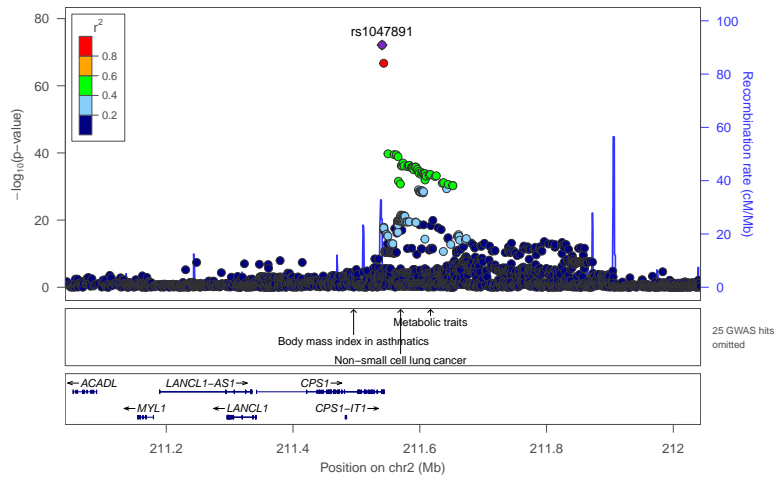

### trans-2-hexenoylglycine

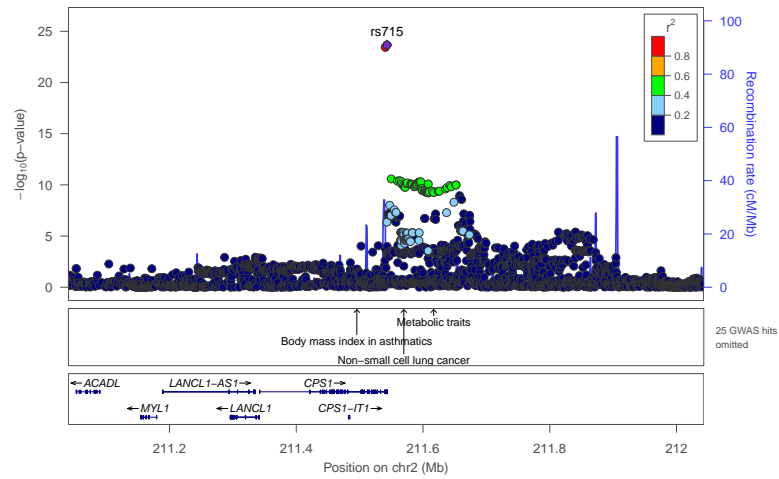

### 4-methylhexanoylglycine

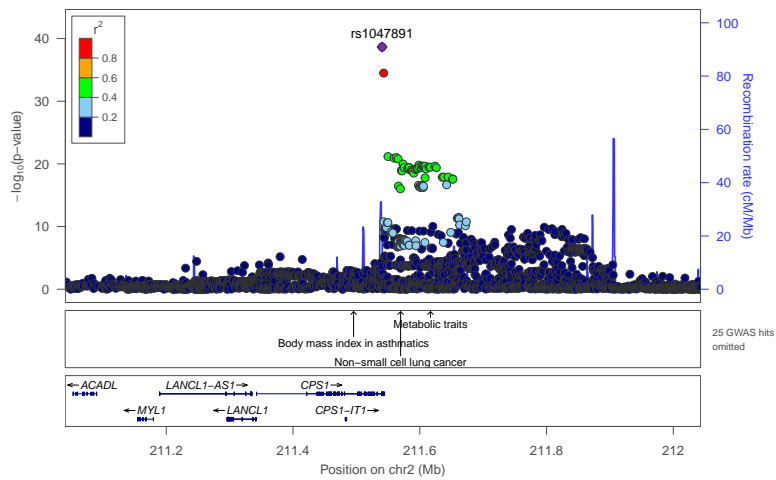

### 5-hydroxymethyl-2-furoylcarnitine\*

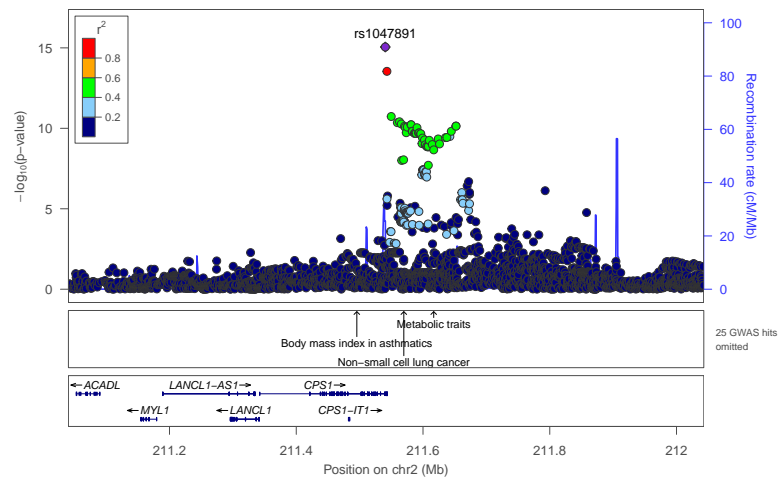

X - 13431

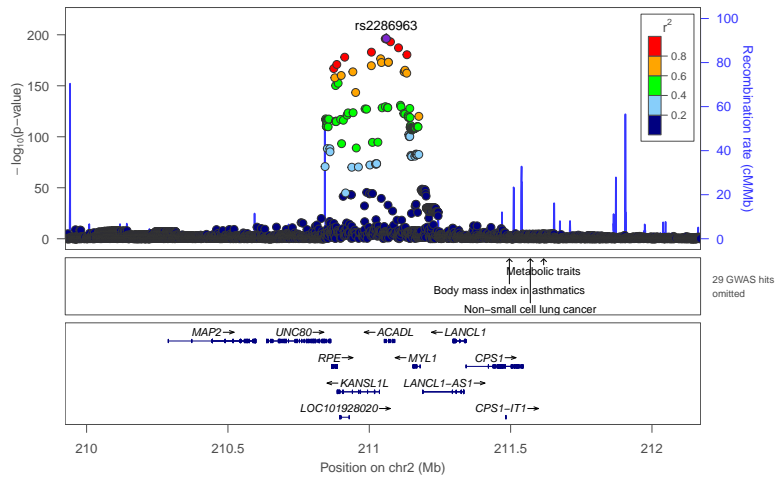

X - 23641

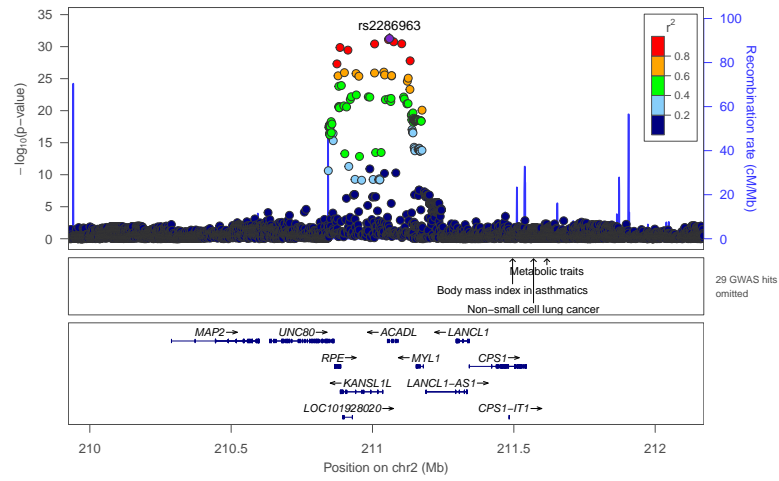

X - 24798

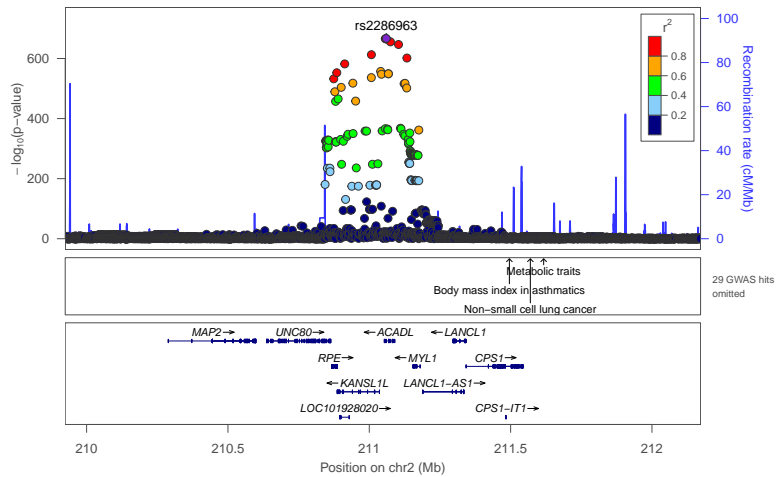

glycine conjugate of C9H16O2\*

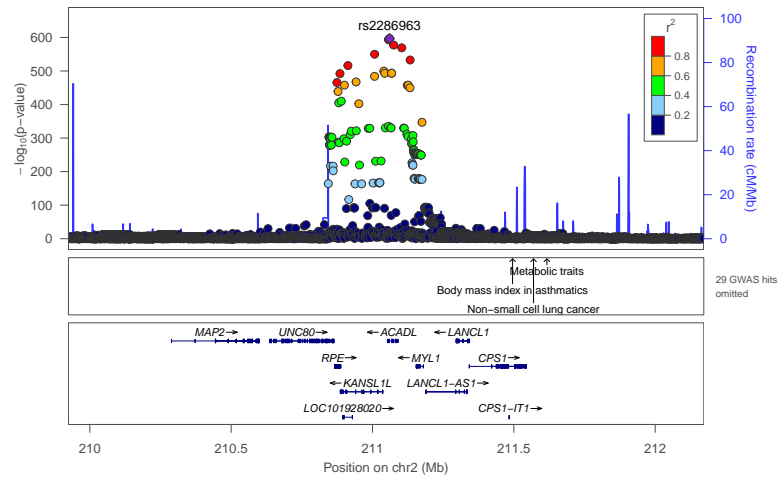

3-methylglutarate/2-methylglutarate

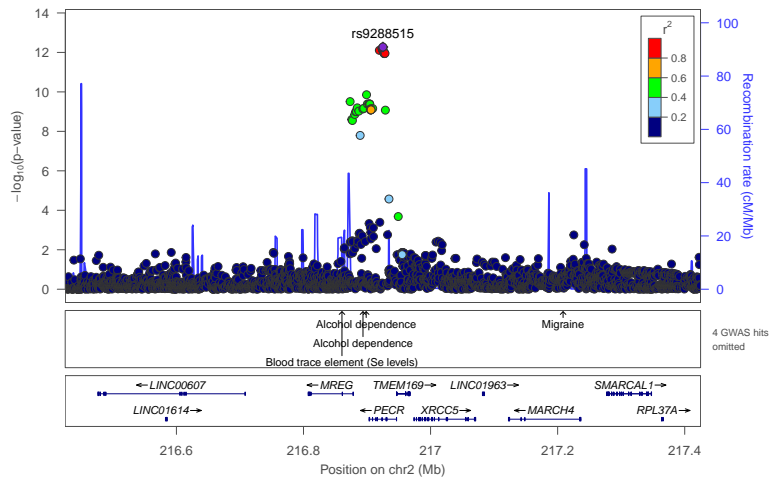

5-(galactosylhydroxy)-L-lysine

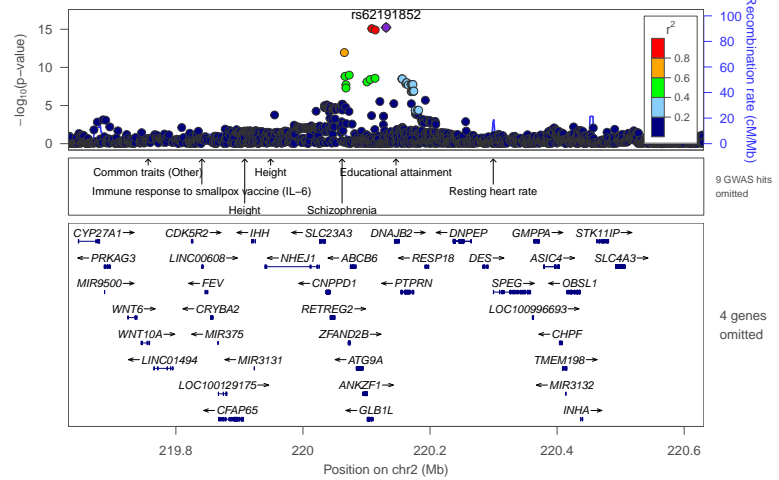

X - 24462

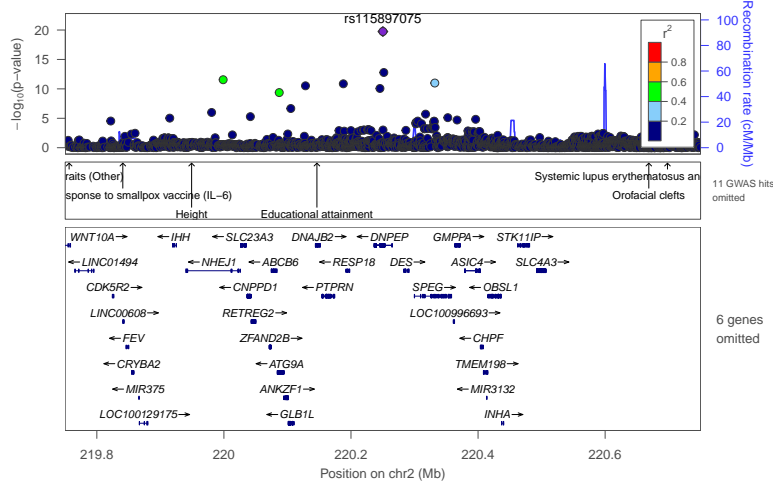

X - 21851

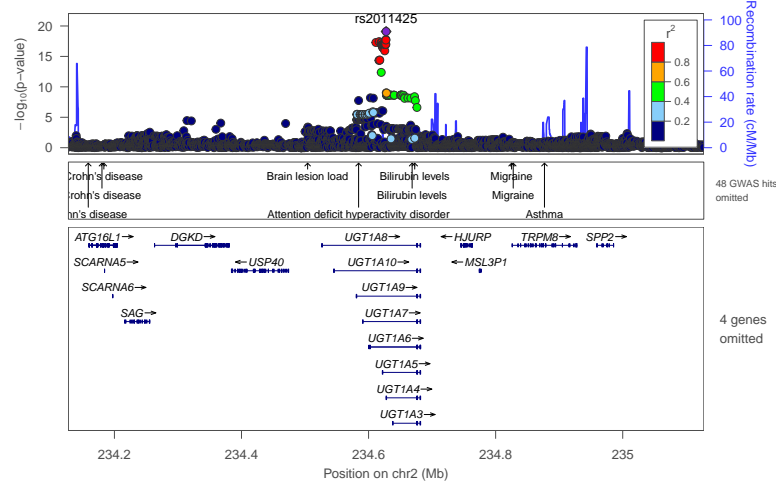

sulfate of piperine metabolite C16H19NO3 (2)\*

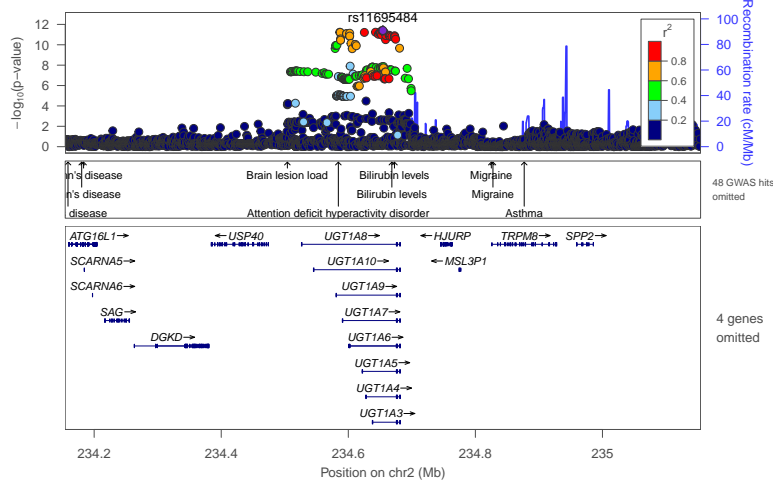

xanthurenate

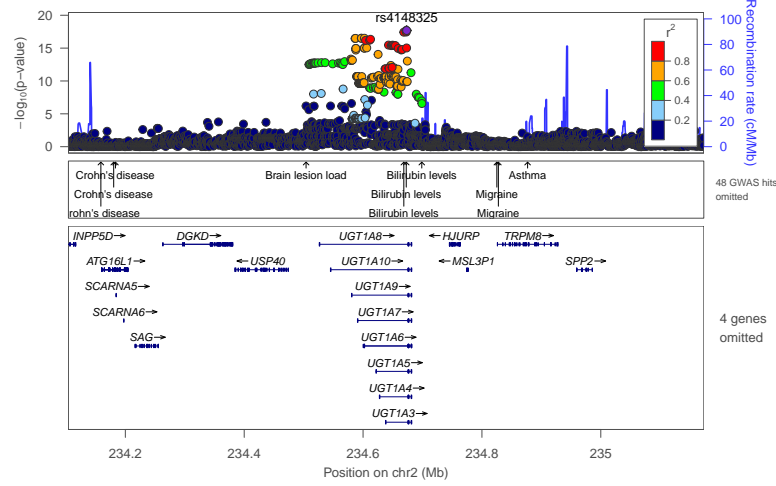

sulfate of piperine metabolite C18H21NO3 (1)\*

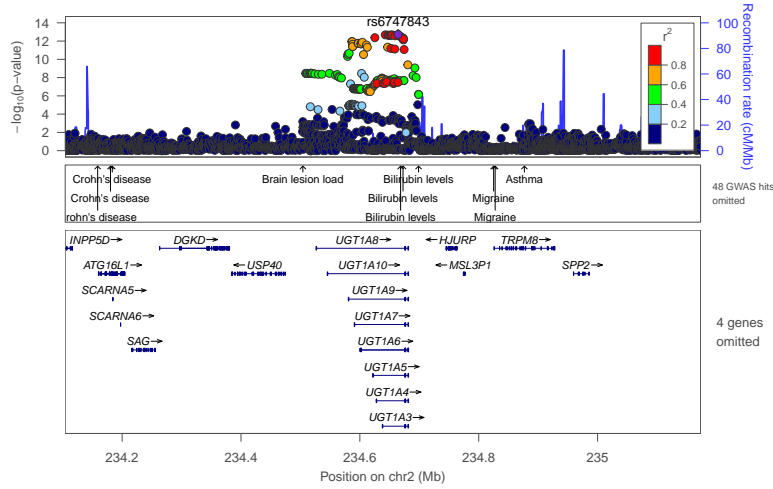

sulfate of piperine metabolite C18H21NO3 (2)\*

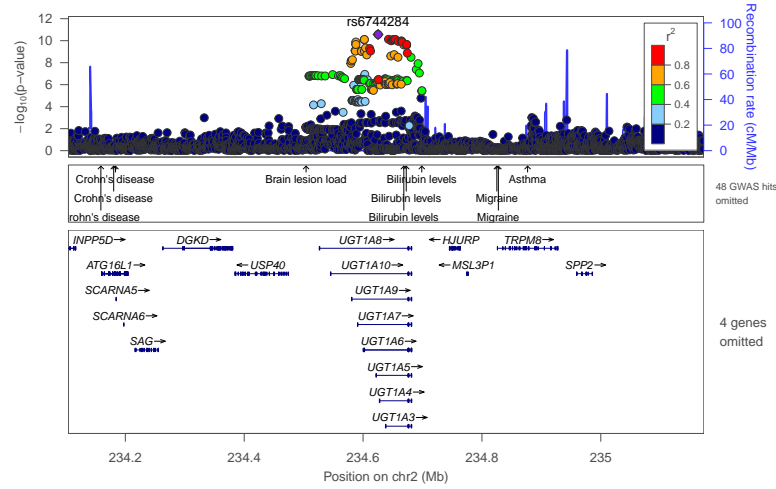



sulfate of piperine metabolite C18H21NO3 (3)\*

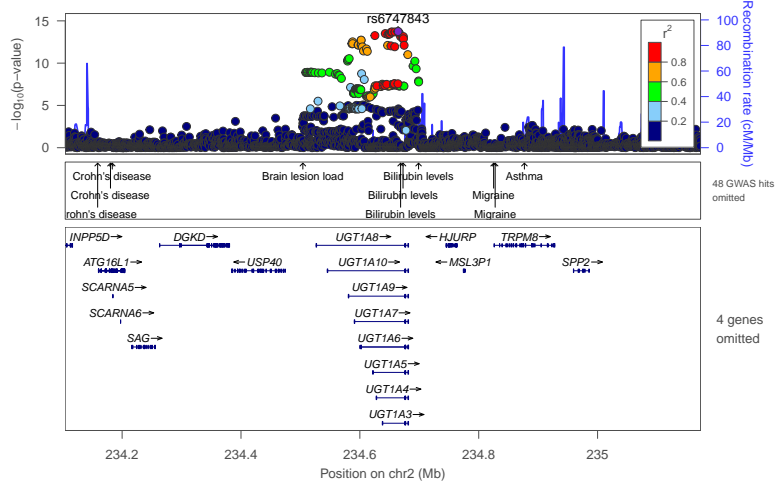

sulfate of piperine metabolite C16H17NO3 (1)\*

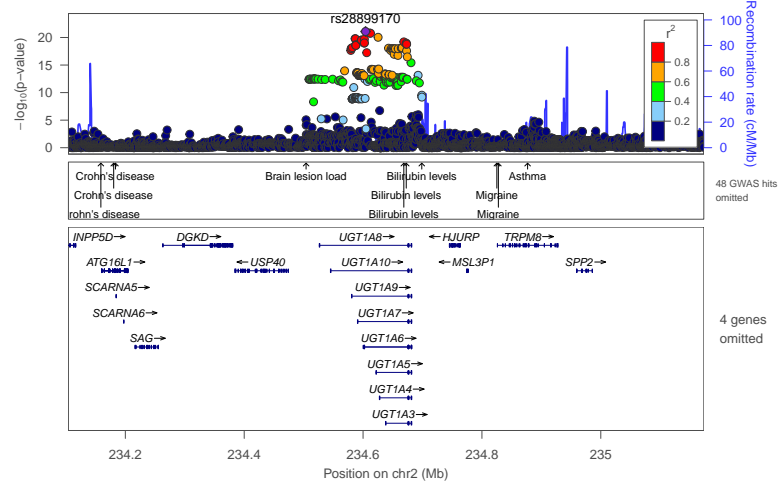

2-hydroxysebacate

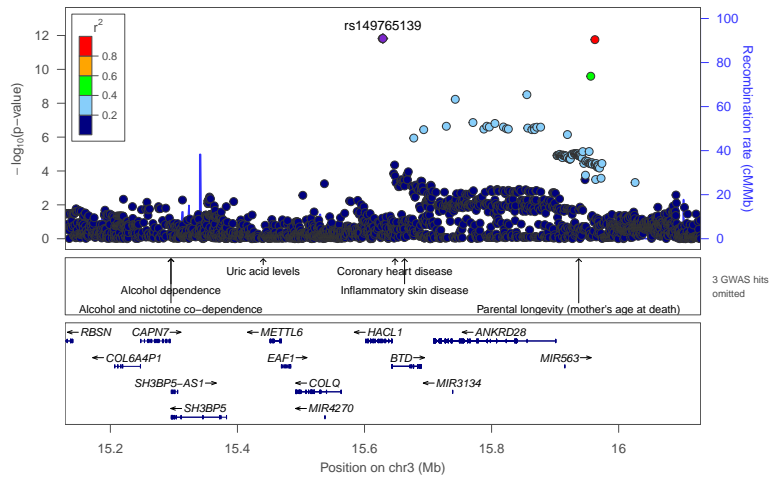

N-acetylcarnosine

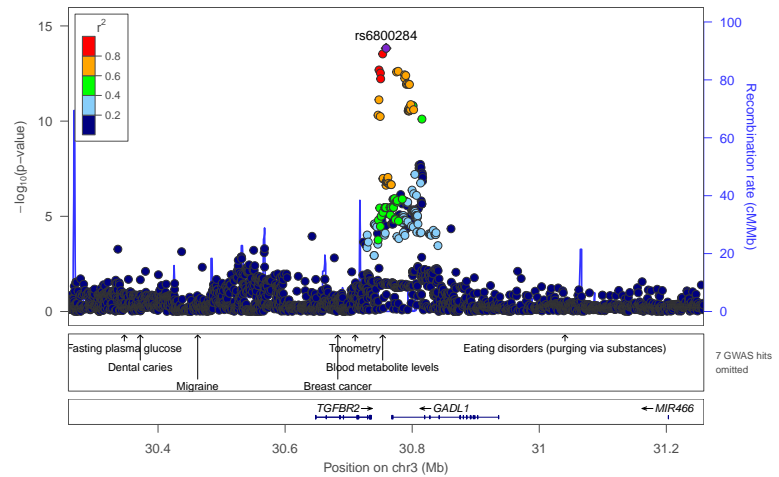

dimethylglycine

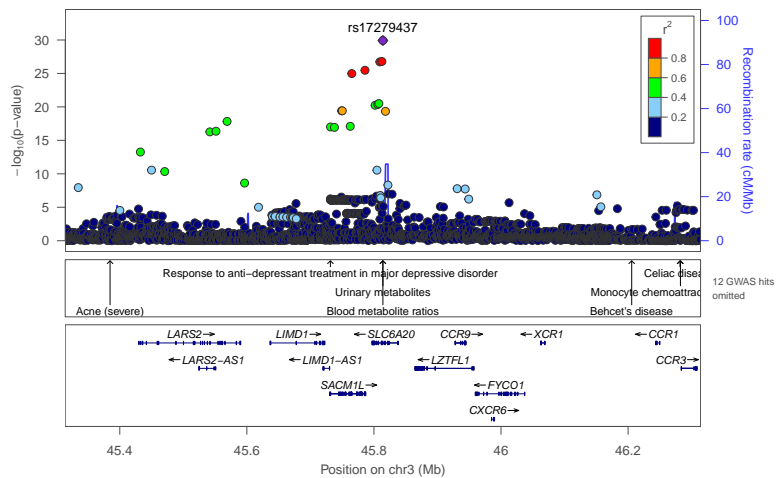

succinylcarnitine (C4-DC)

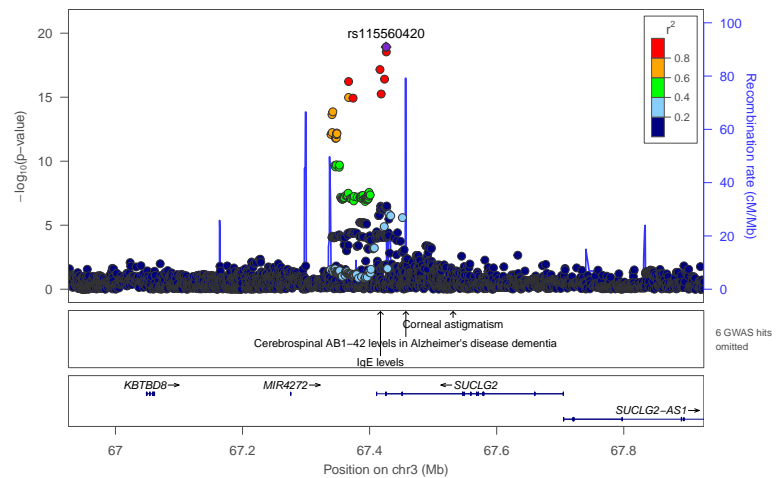

beta-hydroxyisovaleroylcarnitine

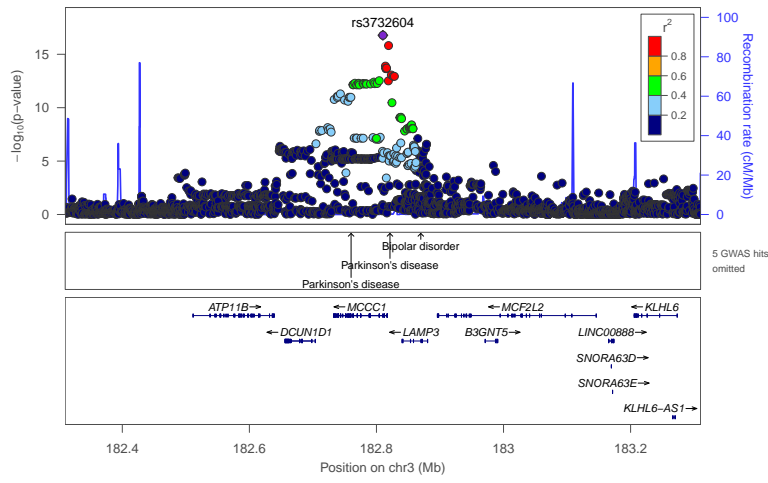

(N(1) + N(8))-acetylspermidine

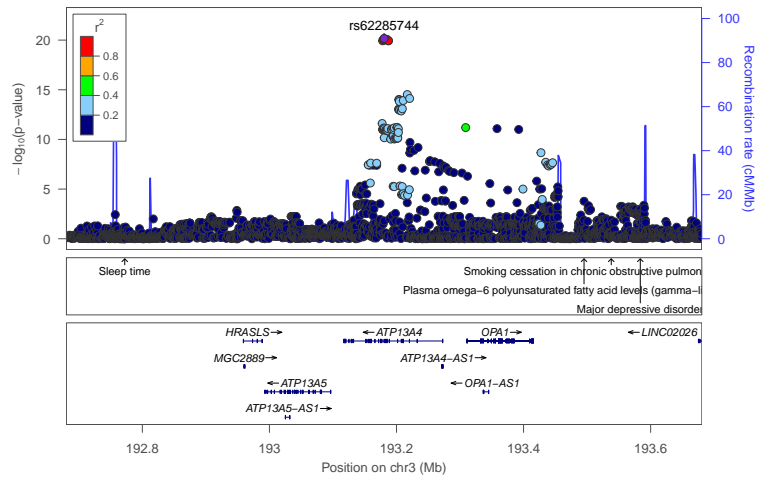

2'-deoxyguanosine

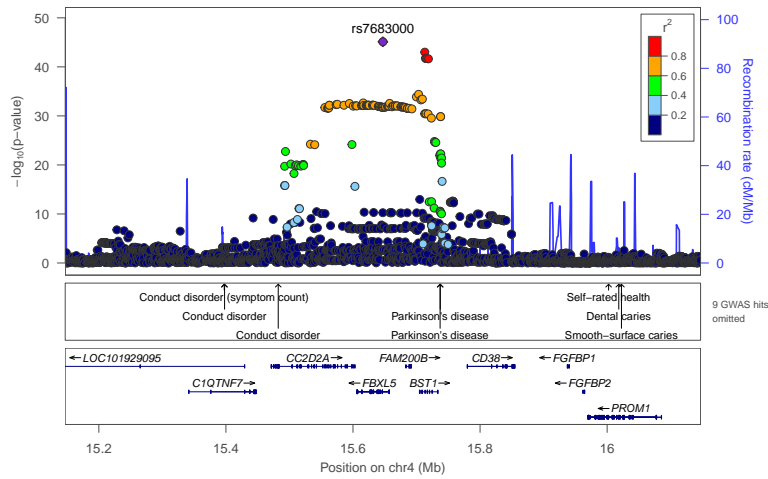

3-methylcytidine

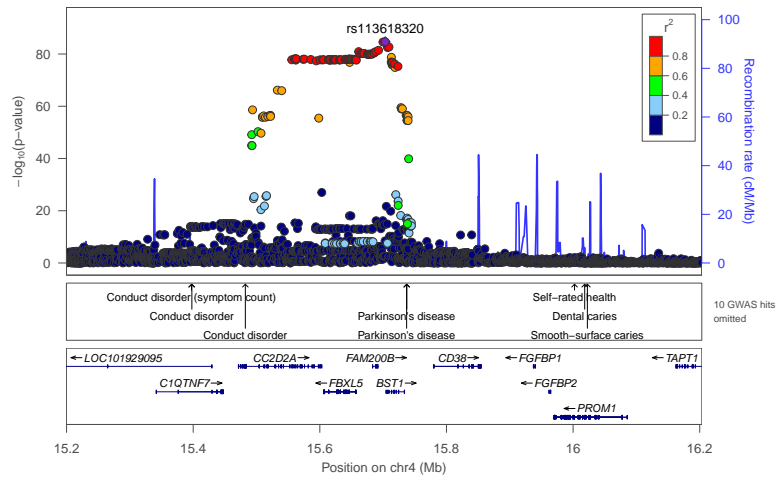

X - 21283

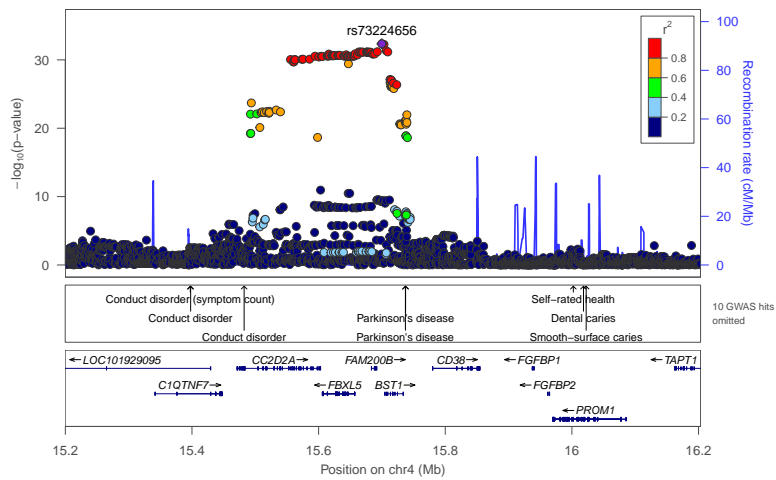

methyl glucopyranoside (alpha + beta)

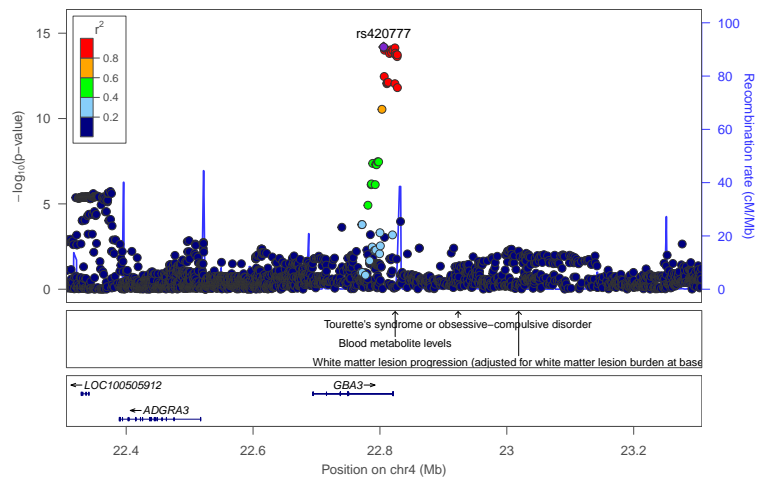

X - 13847

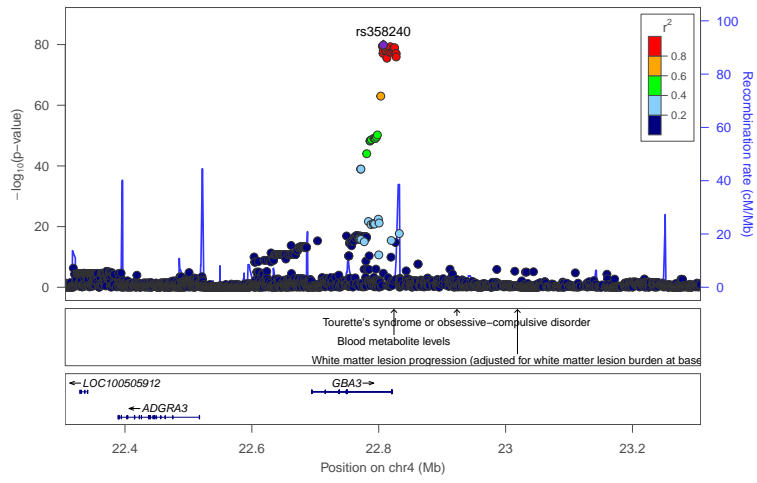

X - 23299

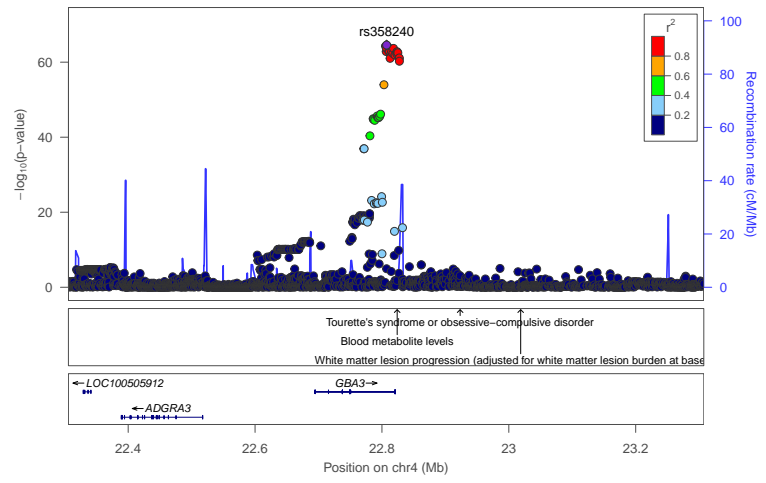

X - 23311

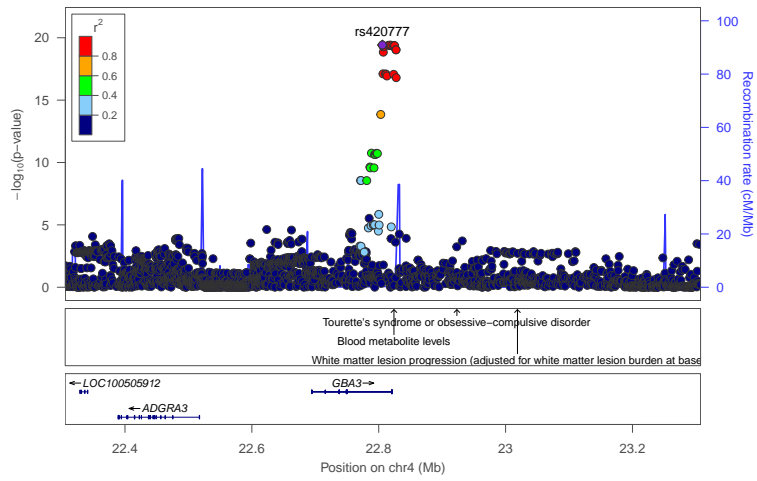

ethyl beta-glucopyranoside

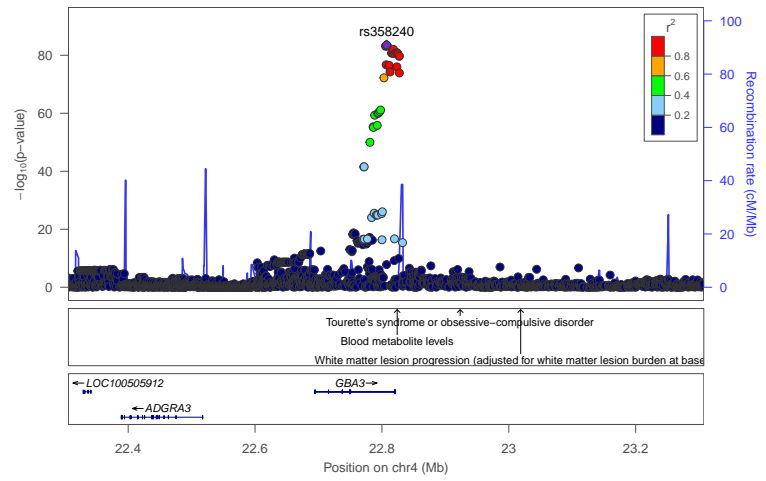

X - 24838

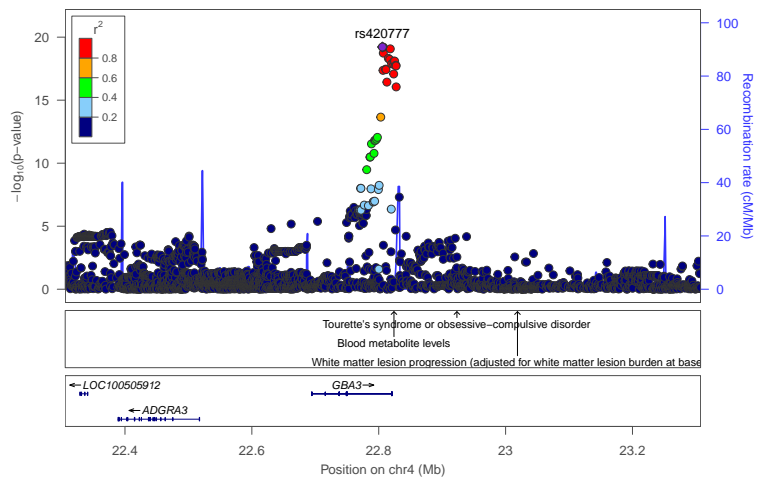

X - 24417

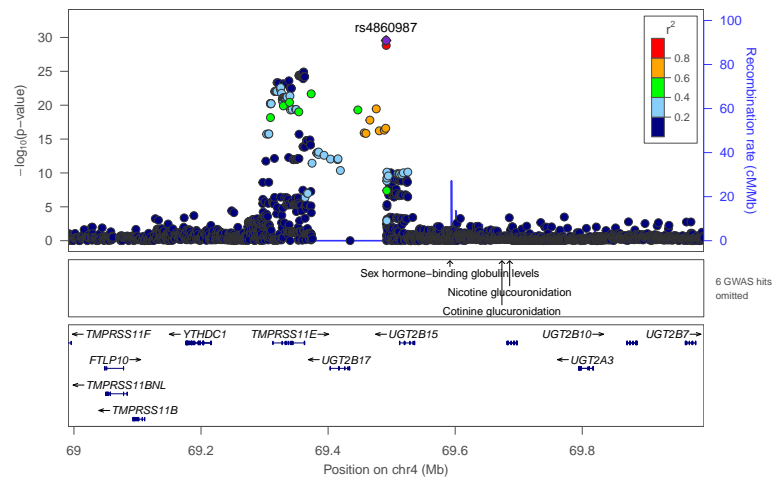

vanillylmandelate (VMA)

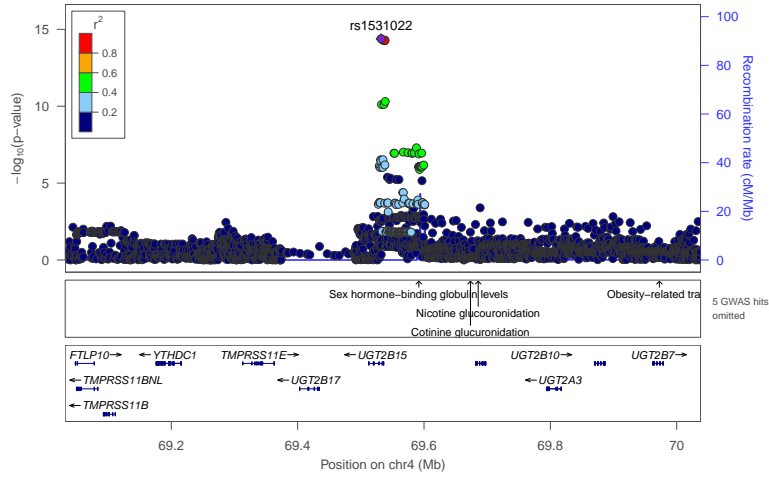

X - 12701

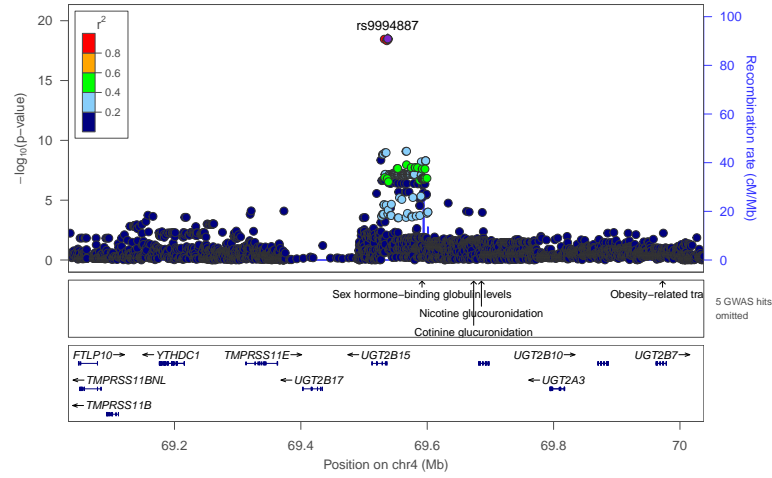

3alpha,21-dihydroxy-5beta-pregnane-11,20-dione 21-glucuronide

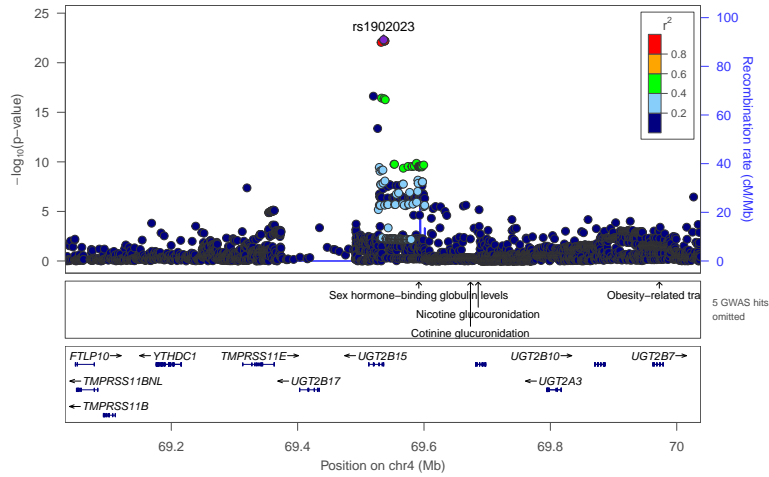

X - 17328

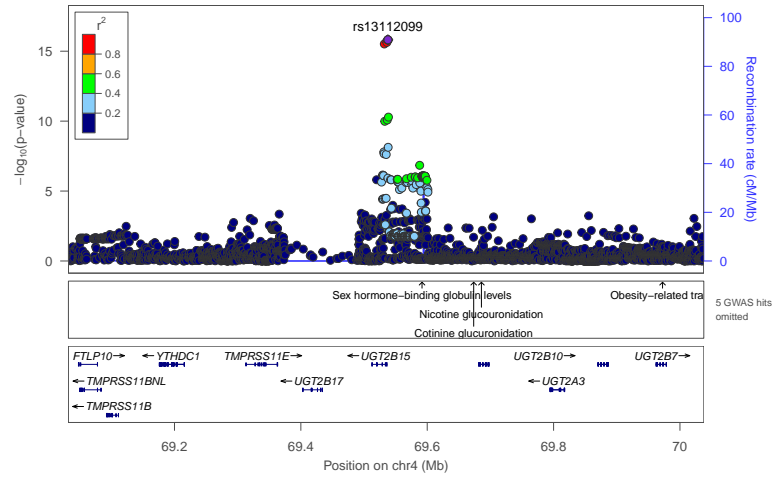

X - 13688

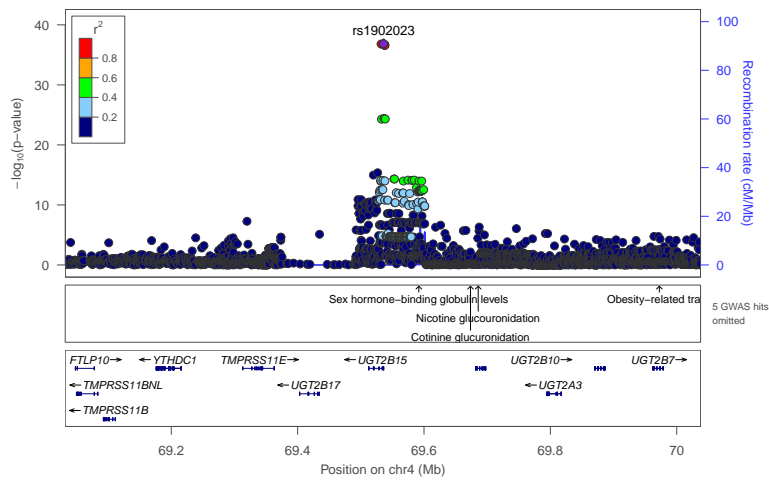

X - 24418

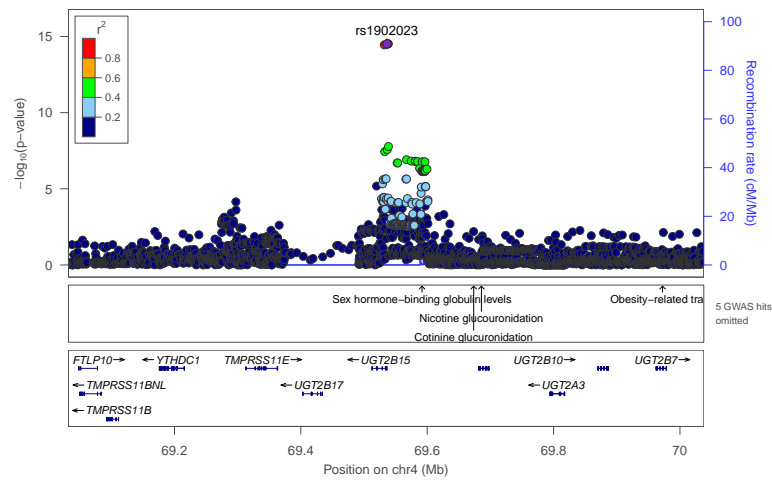

glucuronide of C12H20O3 (4)\*

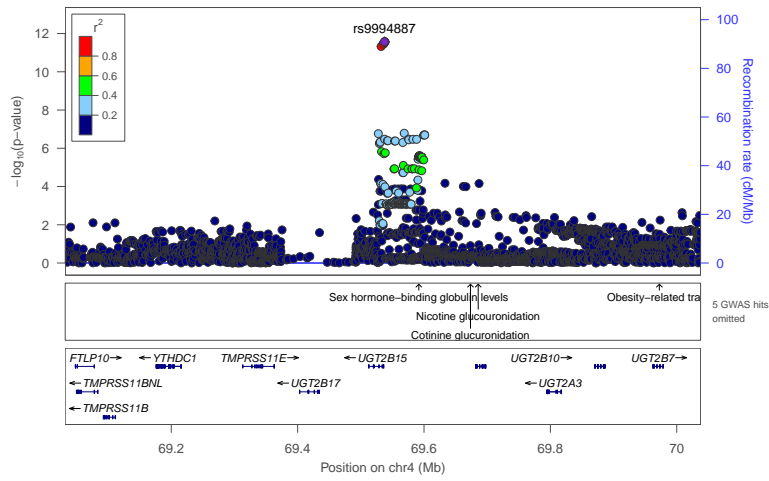

11-ketoetiocholanolone sulfate

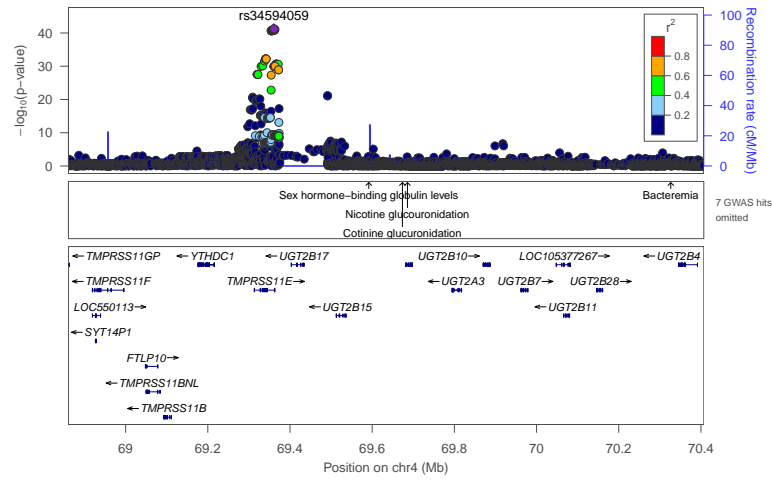

X - 19141

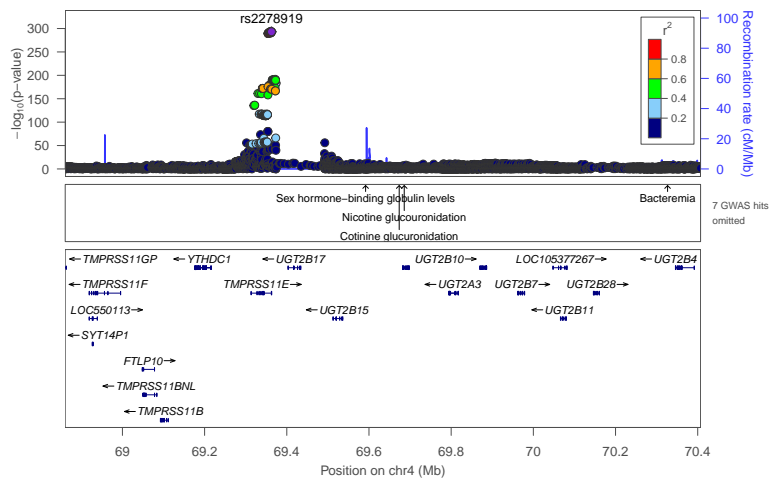

epiandrosterone glucuronide

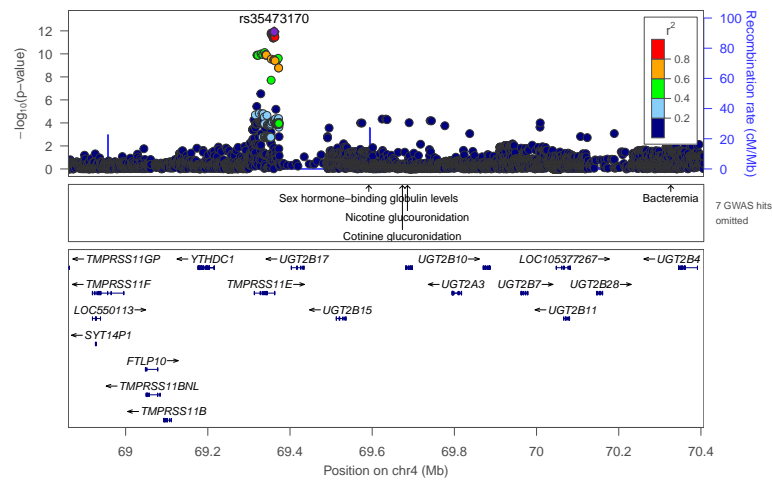

cholic acid glucuronide

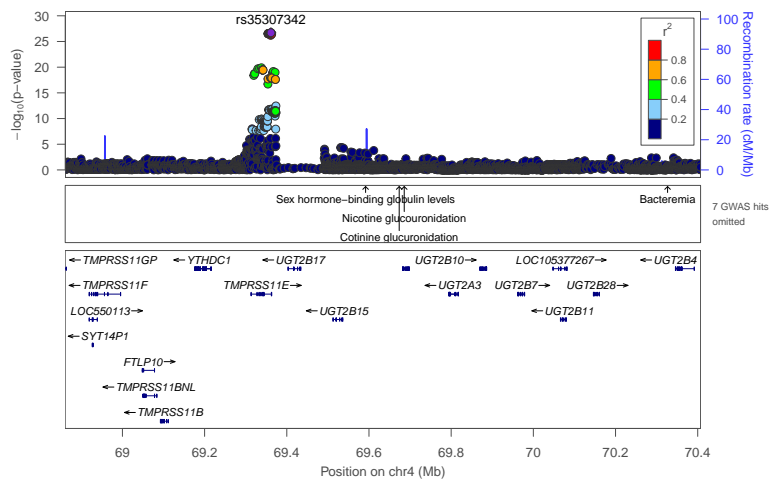

deoxycholic acid glucuronide

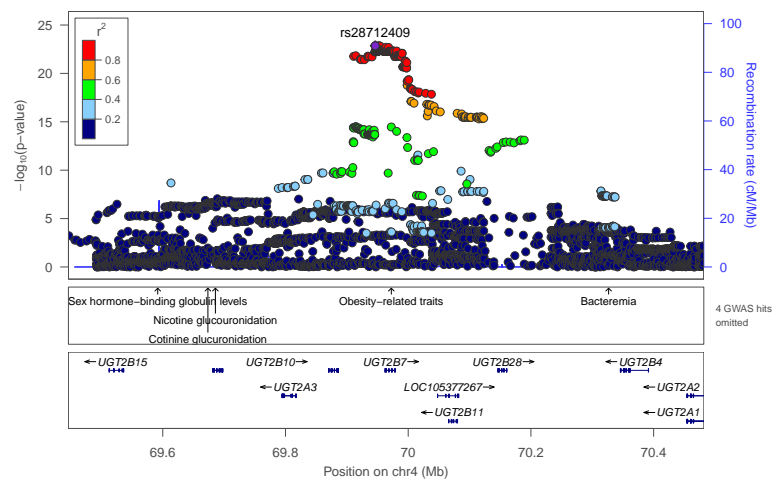

glucuronide of C<sub>12</sub>H<sub>22</sub>O<sub>4</sub> (2)\*

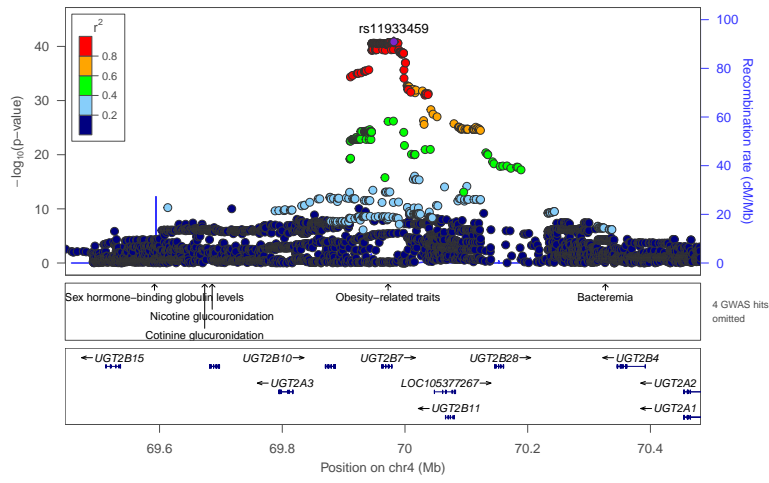

glucuronide of C<sub>14</sub>H<sub>26</sub>O<sub>4</sub> (2)\*

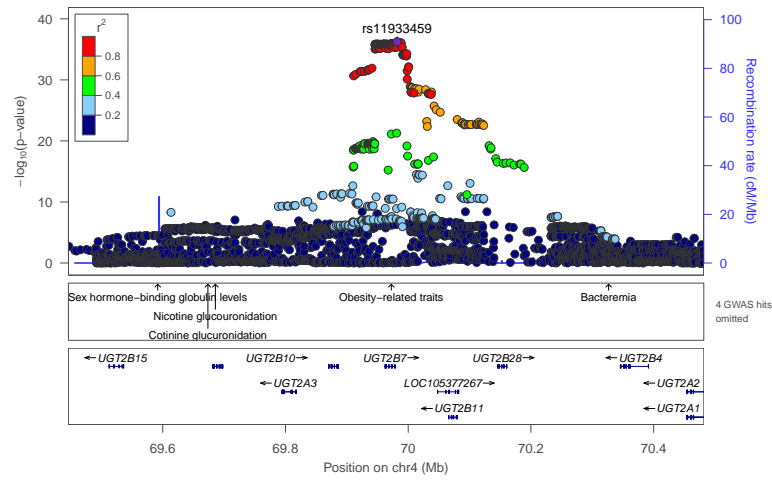

tetrahydrocortisone glucuronide (5)

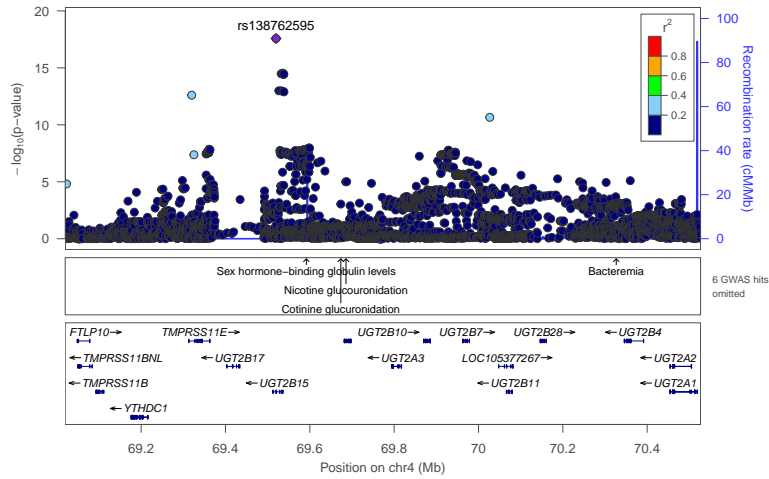

orotidine

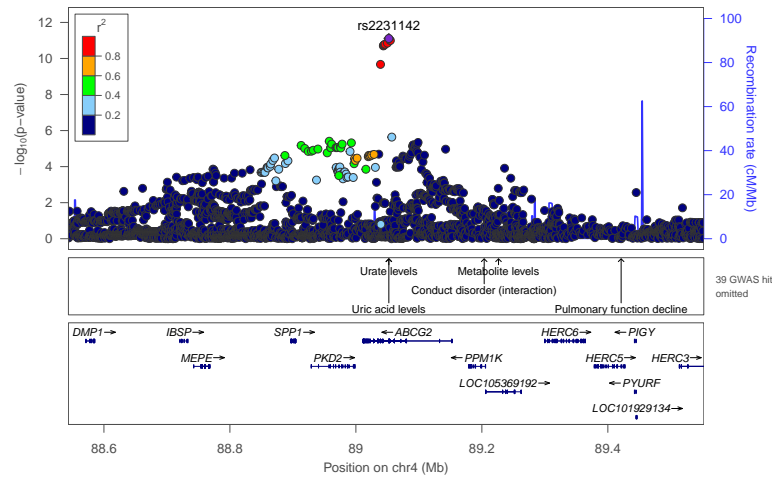

X - 11612

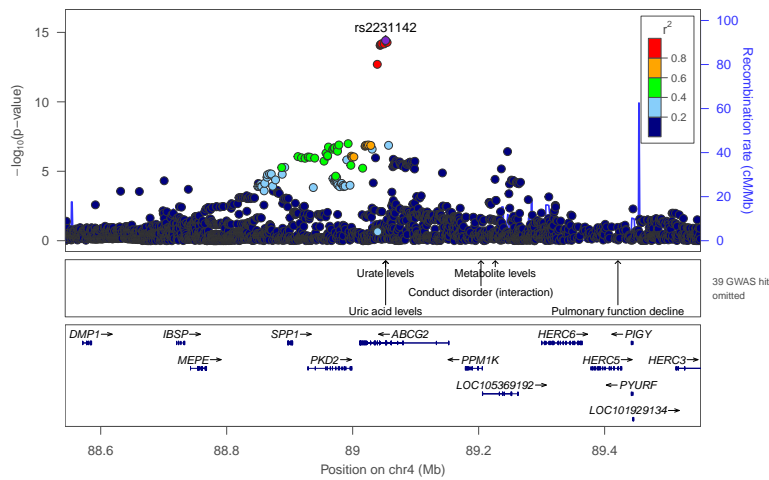

sulfate of piperine metabolite C<sub>18</sub>H<sub>21</sub>NO<sub>3</sub> (1)\*

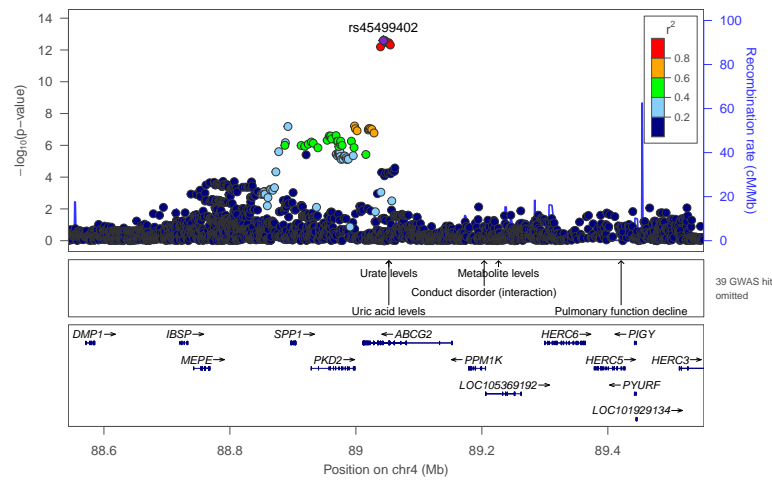



sulfate of piperine metabolite C<sub>18</sub>H<sub>21</sub>NO<sub>3</sub> (2)\*

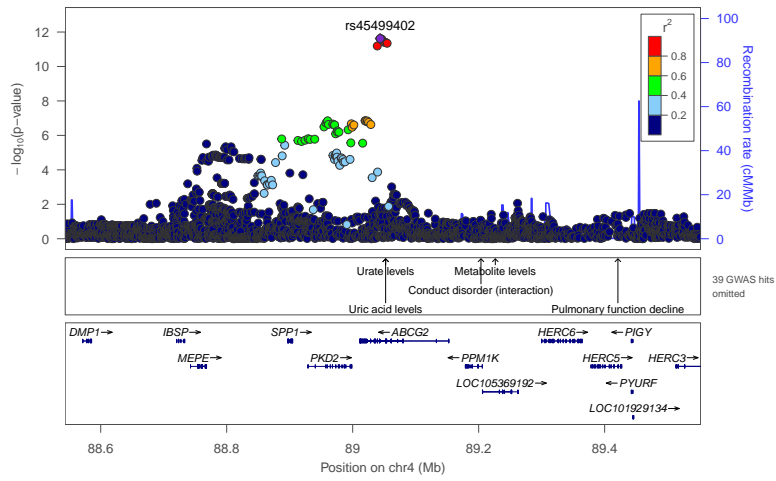

sulfate of piperine metabolite C<sub>18</sub>H<sub>21</sub>NO<sub>3</sub> (3)\*

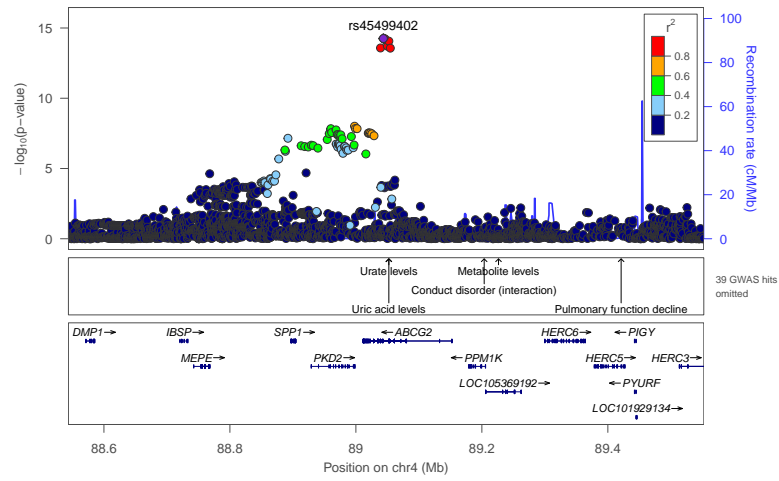

N,N-dimethyl-pro-pro

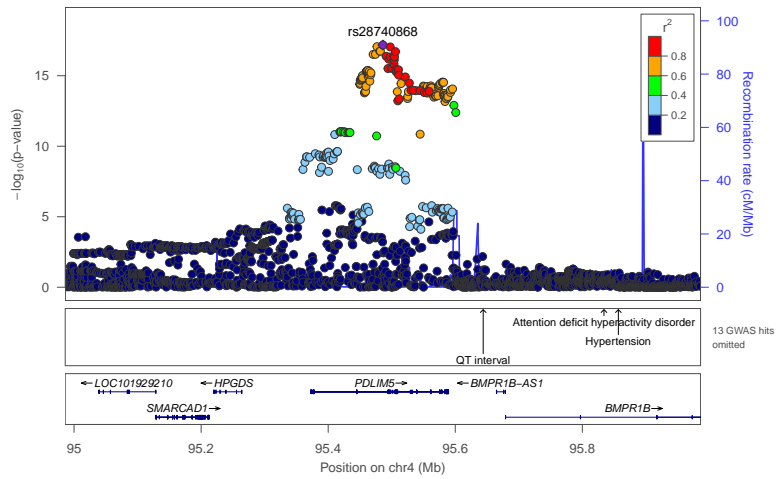

gluconate

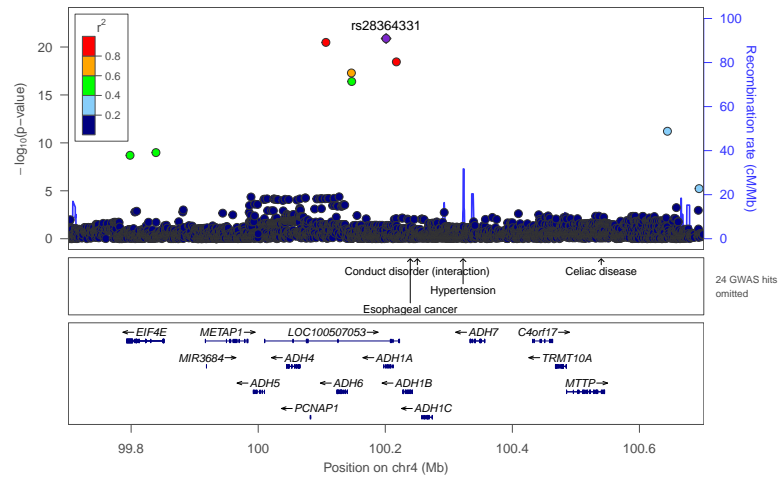

argininate\*

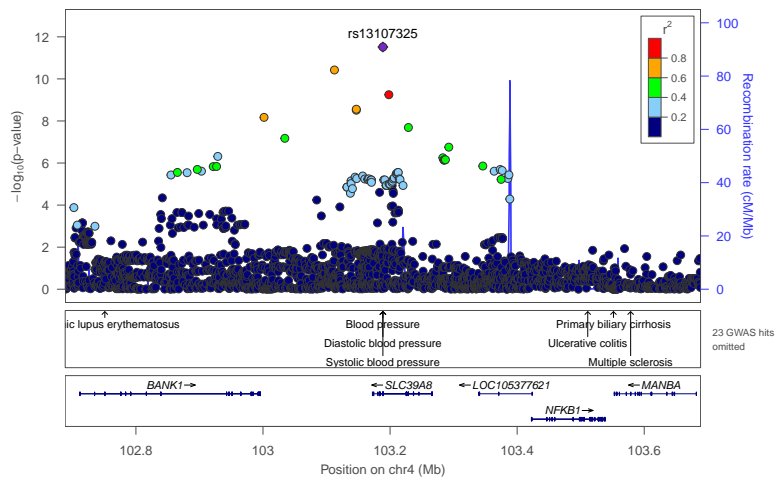

N-acetylglucosamine/N-acetylgalactosamine

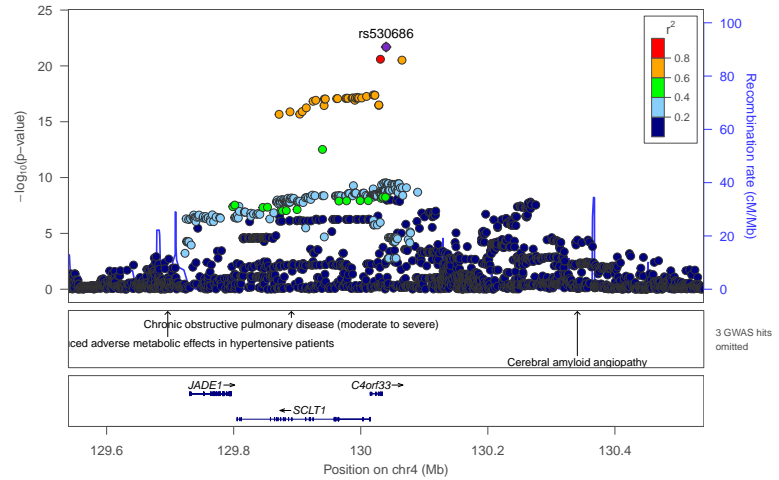

### N-acetylglucosaminylasparagine

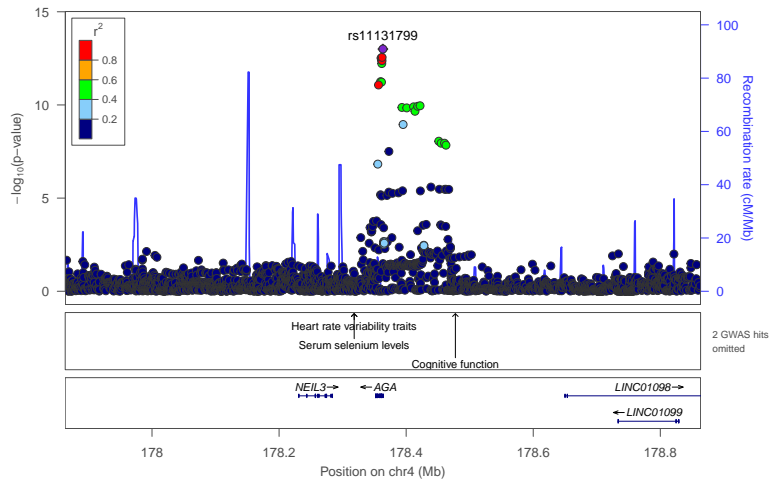

### tyrosine

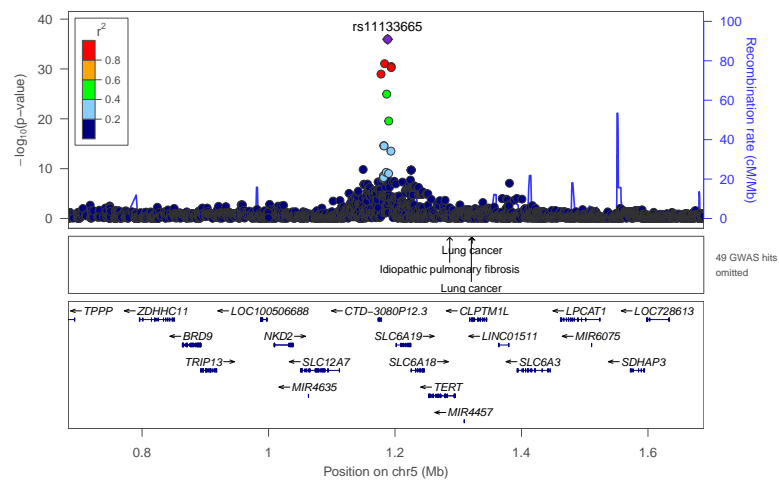

### kynurenine

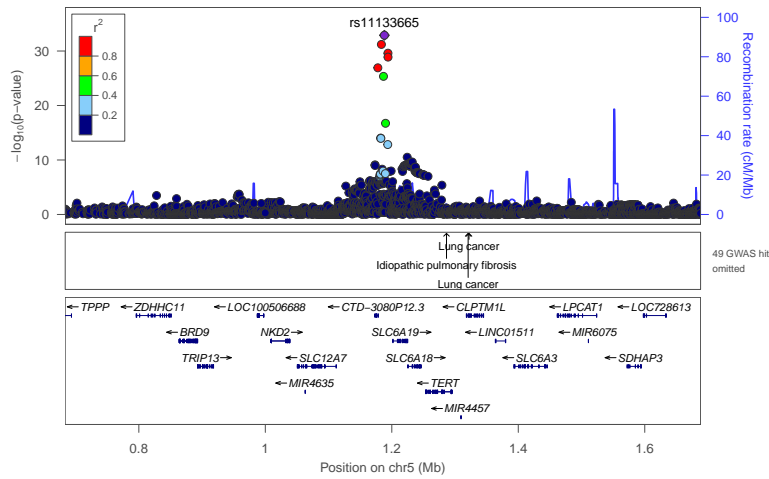

### methionine sulfoxide

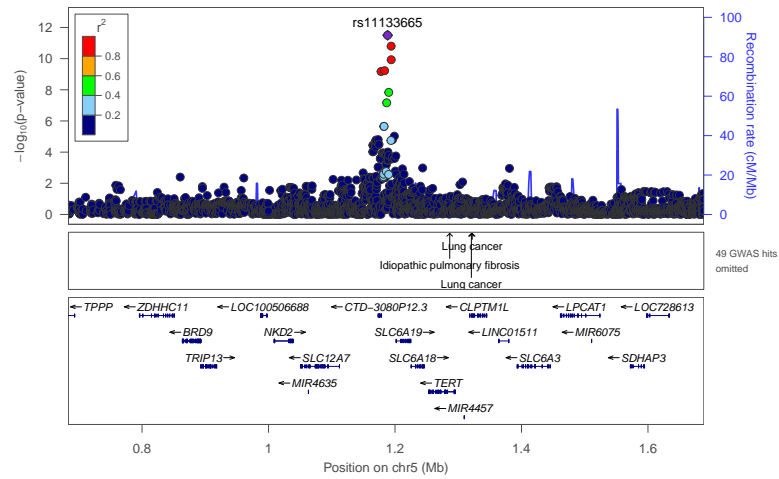

### 3-hydroxykynurenine

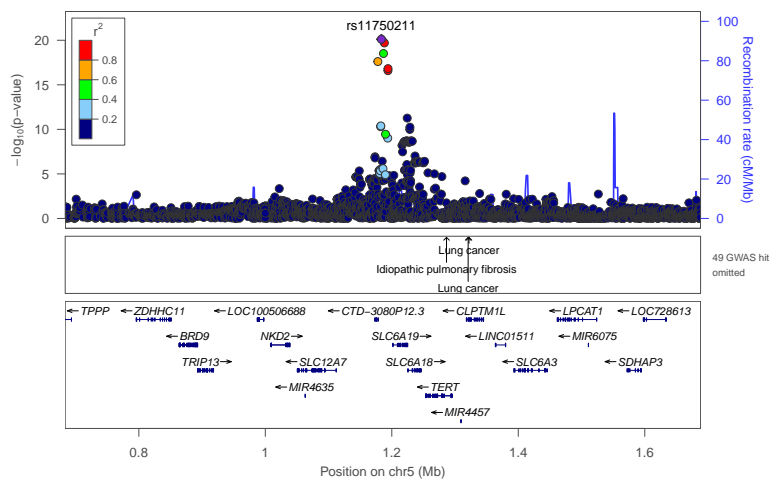

### N-acetyl-1-methylhistidine\*

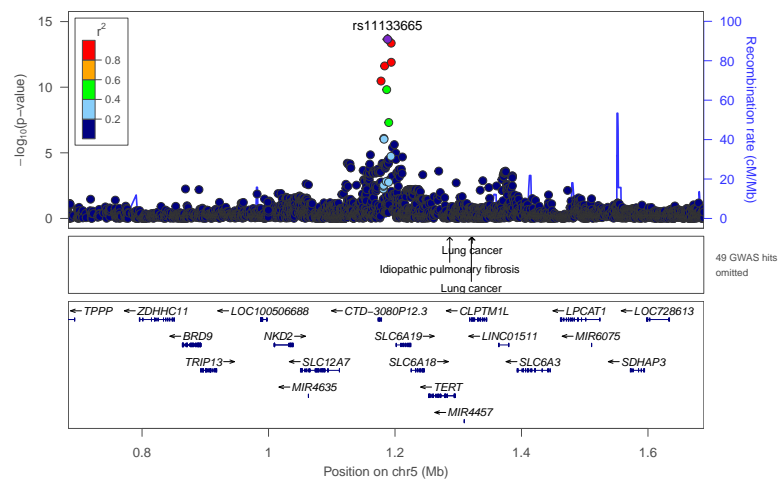

### asparagine

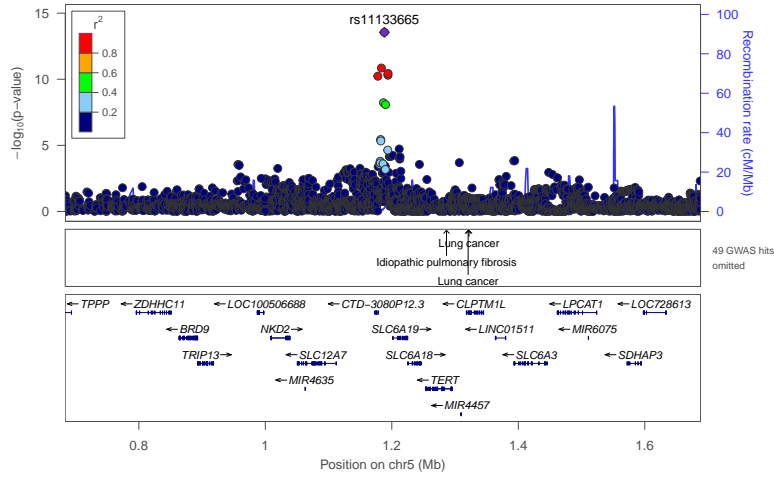

### tryptophan

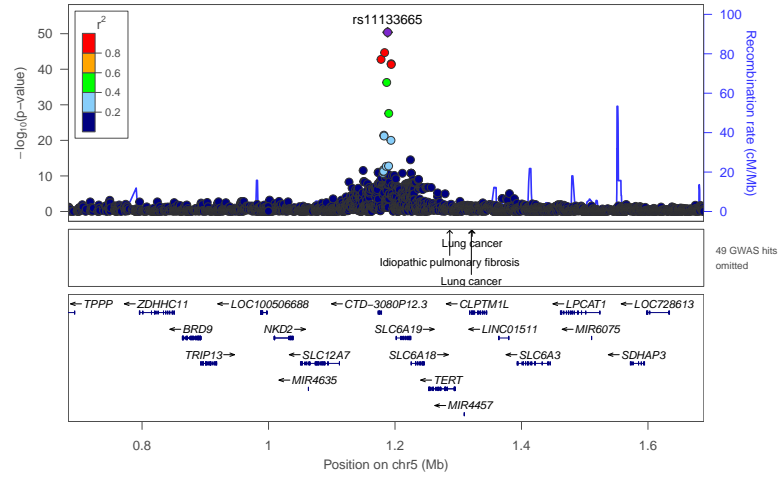

### histidine

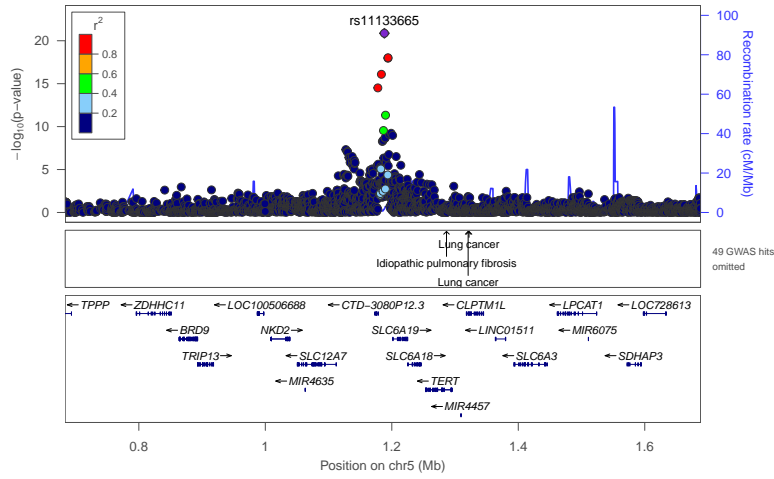

### phenylalanine

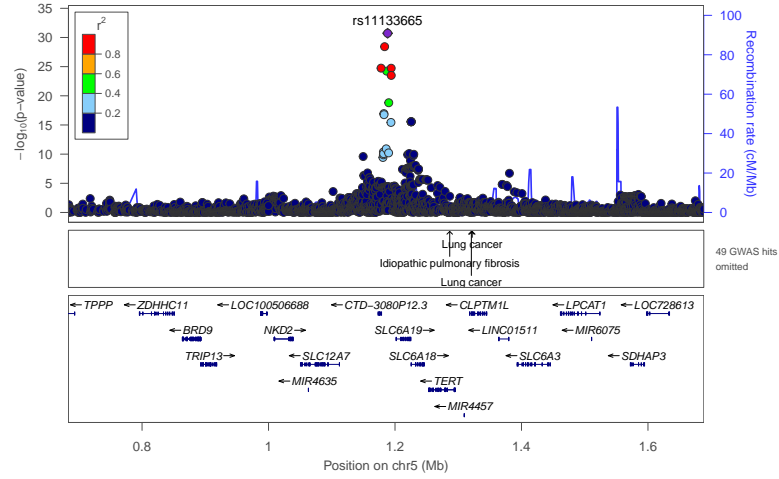

### 3-aminoisobutyrate

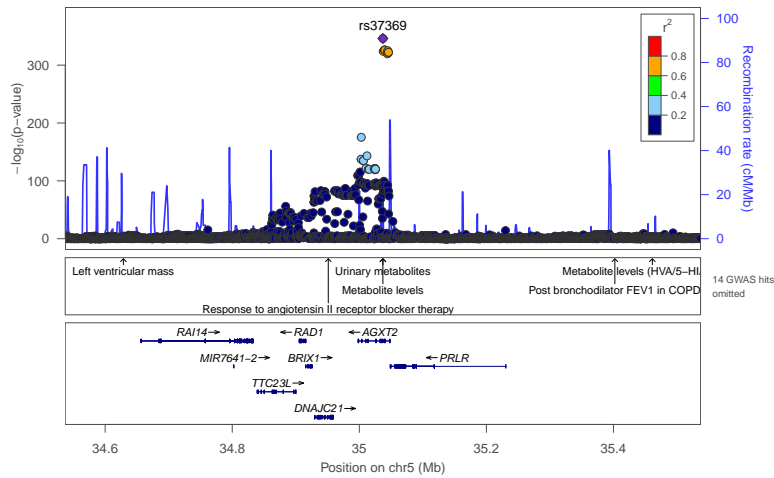

### 5-aminovalerate

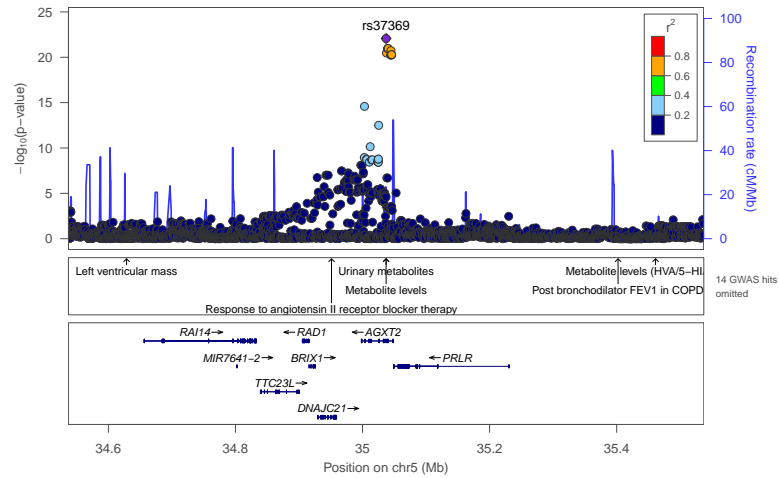

### N2,N2-dimethylguanosine

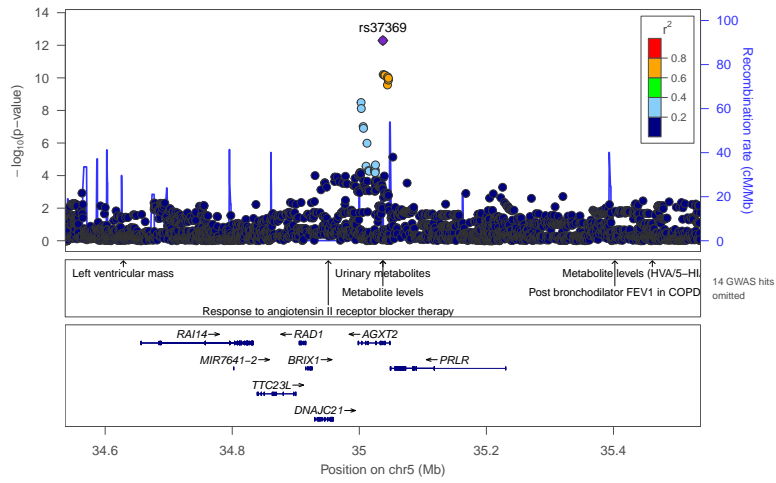

### dimethylarginine (SDMA + ADMA)

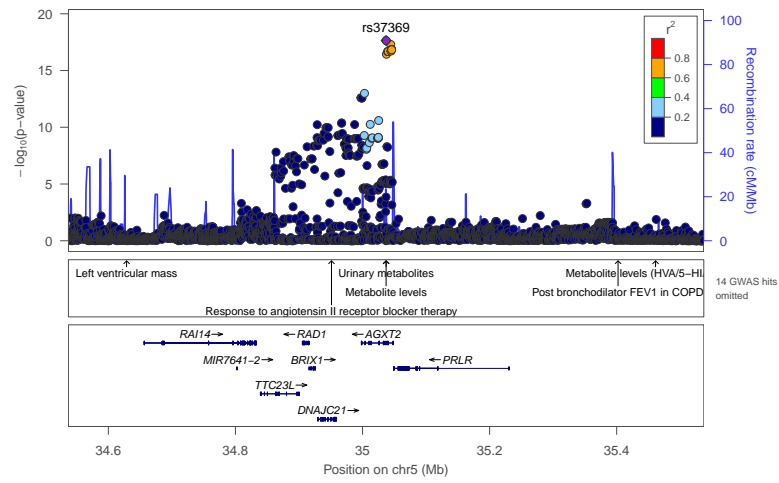

### X - 12125

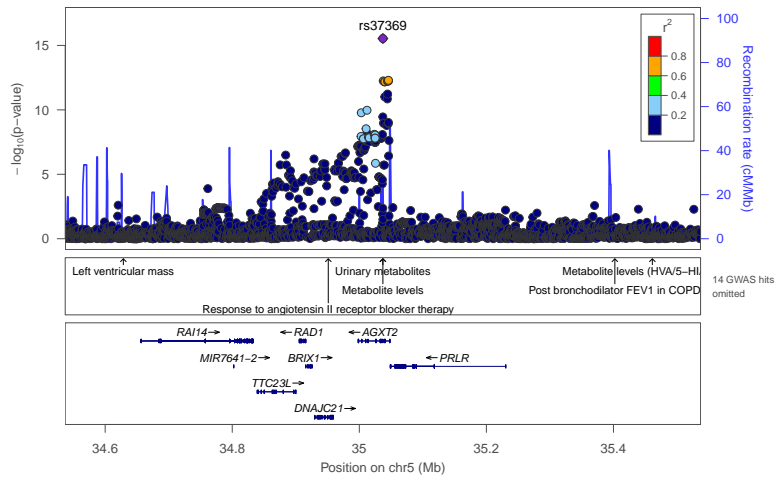

### X - 12097

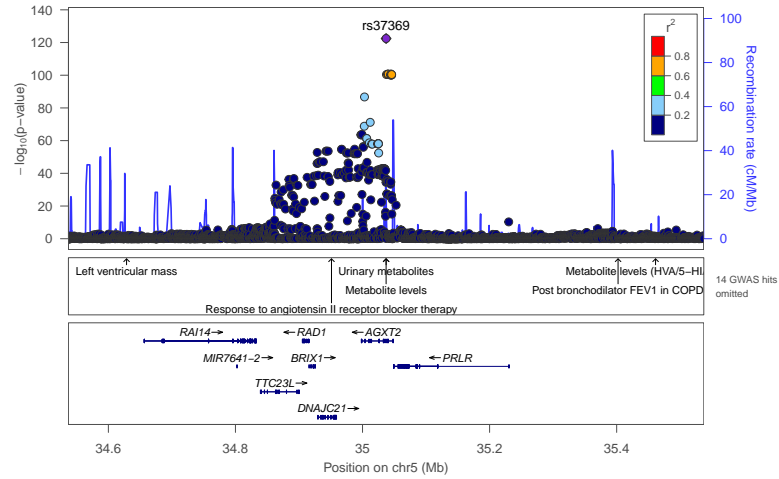

### X - 12096

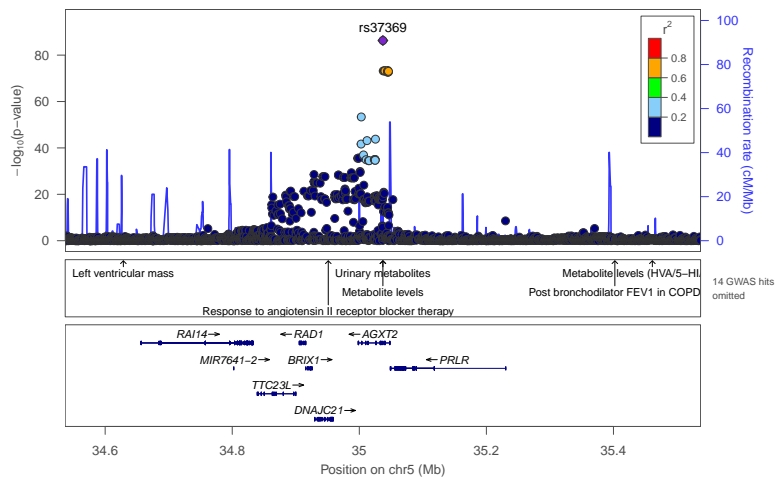

### X - 24387

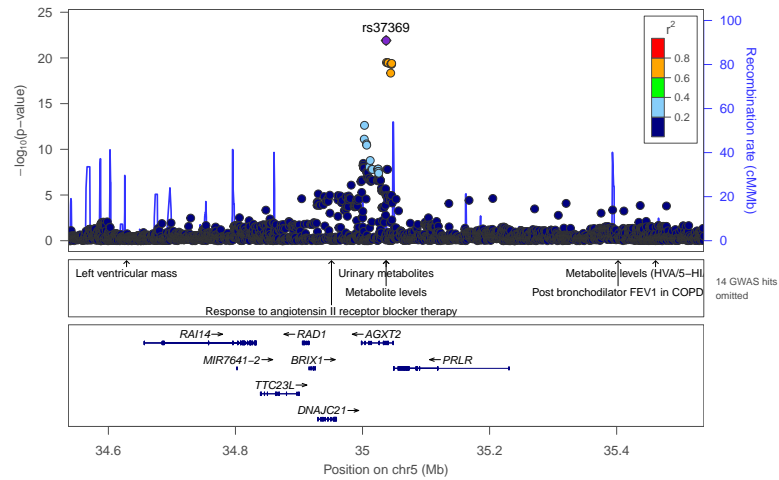

X - 12117

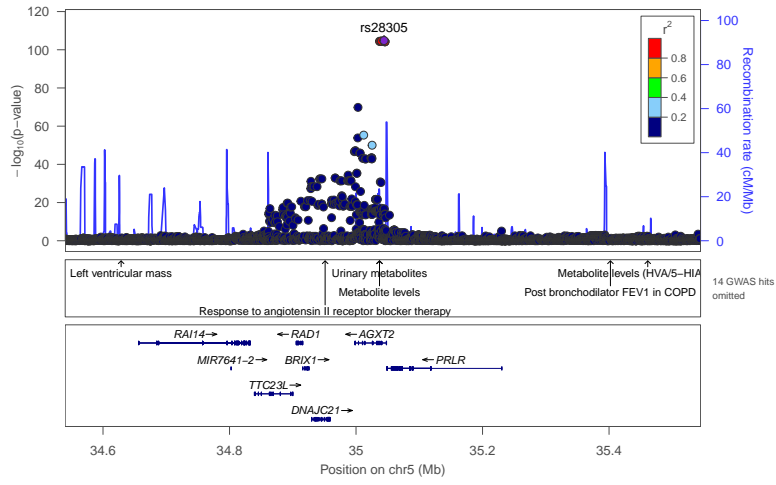

X - 24518

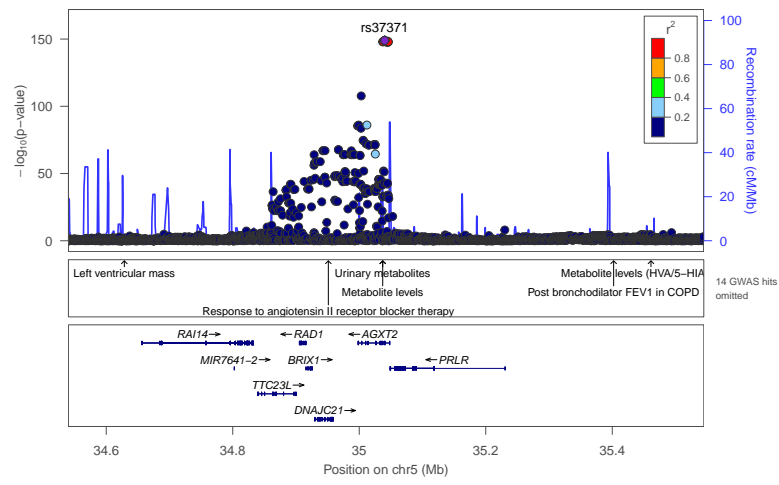

X - 24796

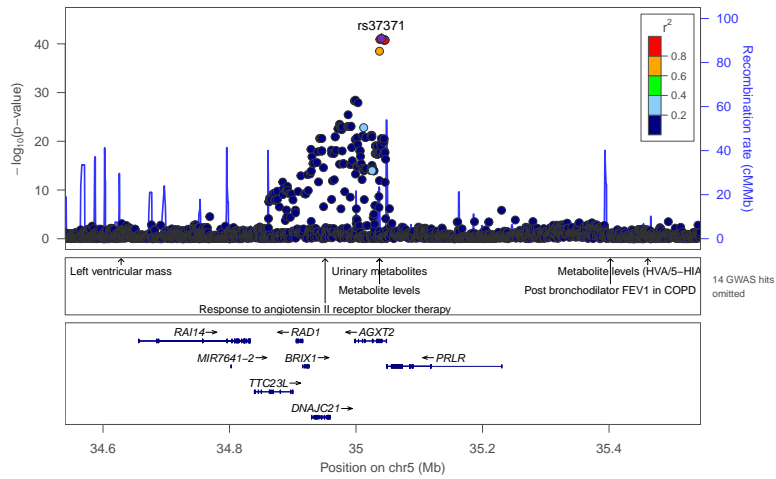

N,N-dimethyl-5-aminovaletrate

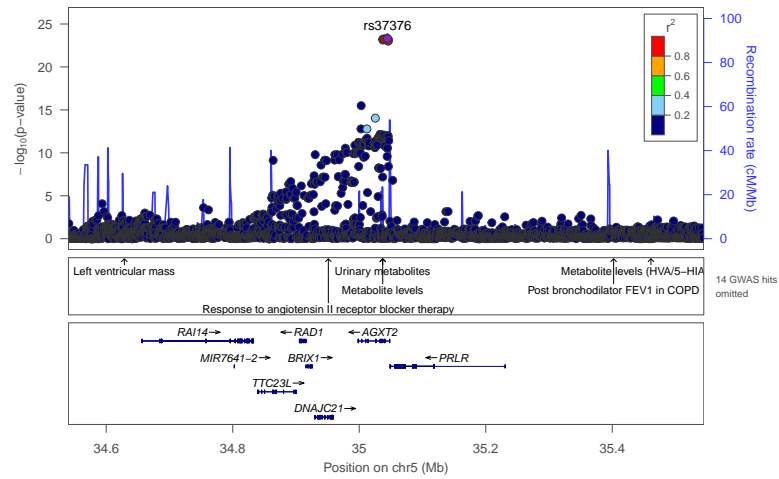

GlcNAc sulfate conjugate of C21H34O2 steroid\*\*

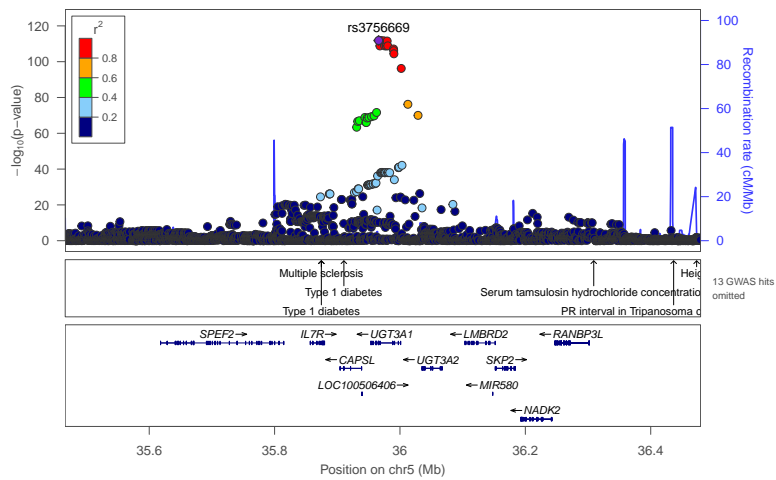

N-acetylglucosamine conjugate of C24H40O4 bile acid\*\*

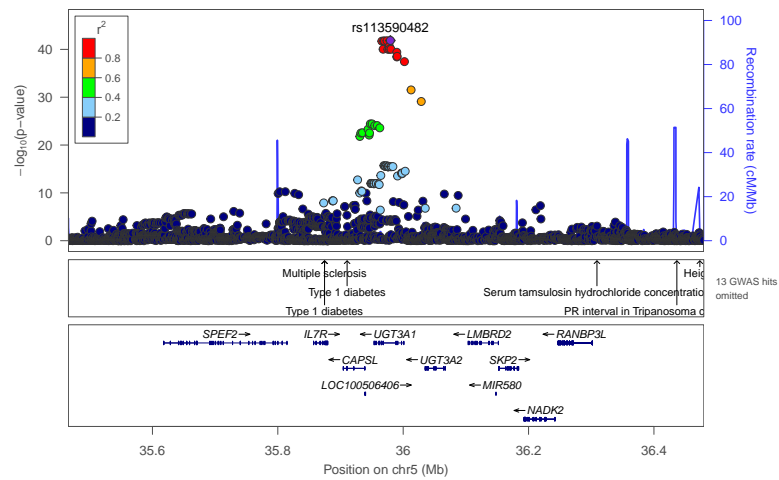

### N-acetylglucosamine conjugate of C24H38O4 bile acid\*\*

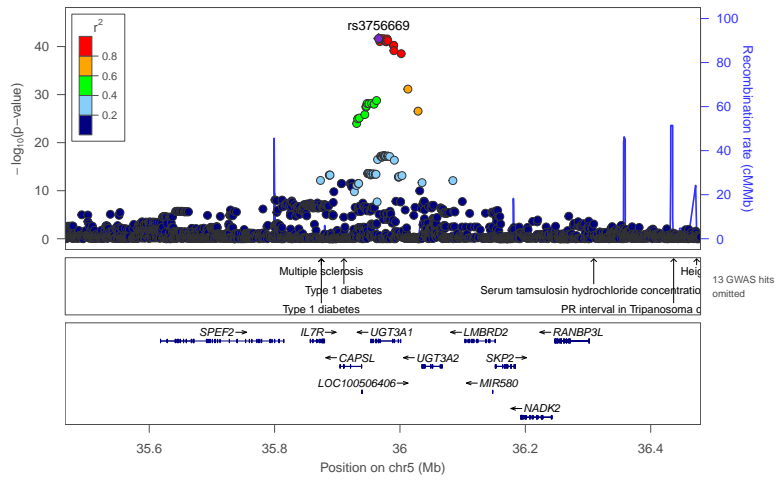

### dimethylglycine

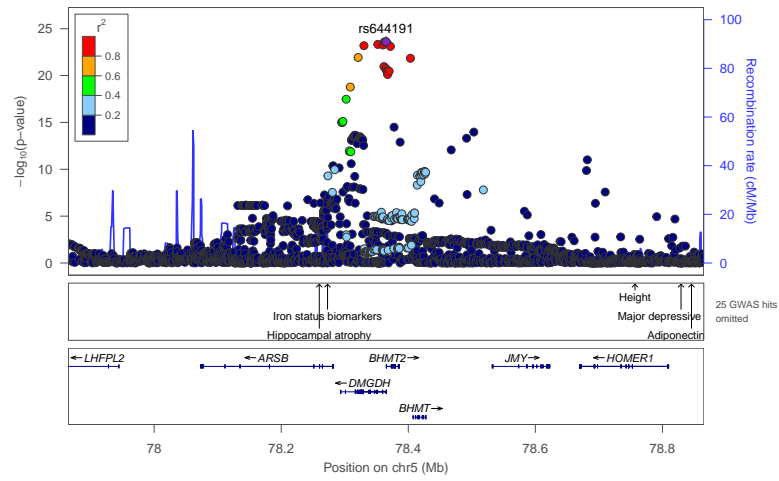

### choline

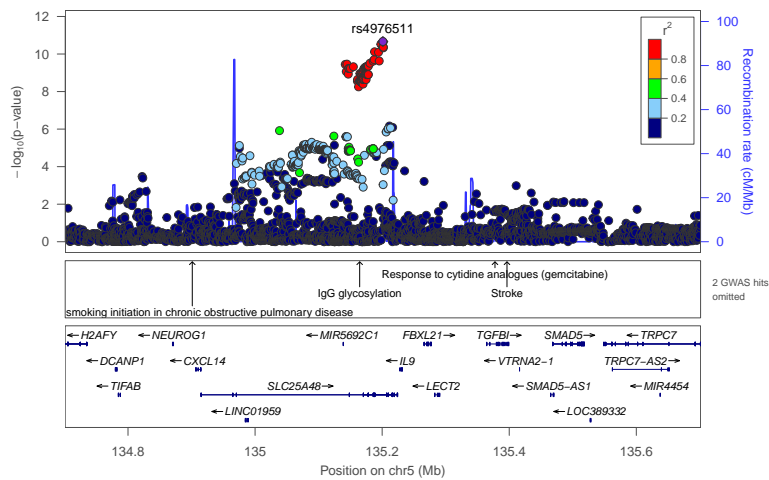

### glycine

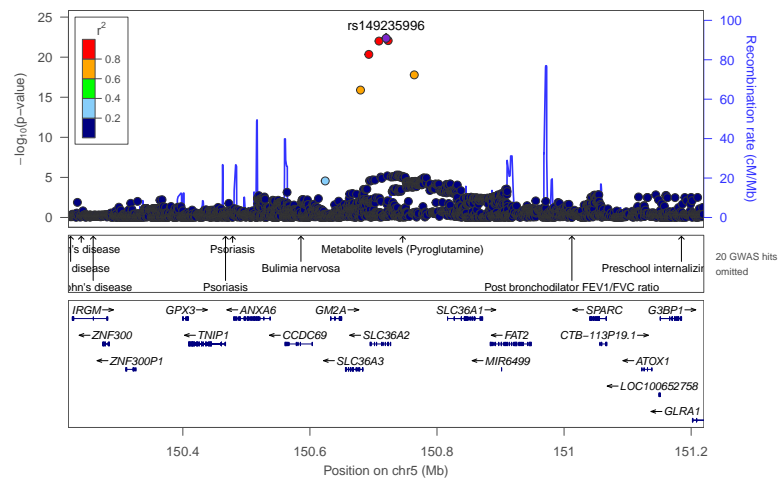

### adenosine 3',5'-cyclic monophosphate (cAMP)

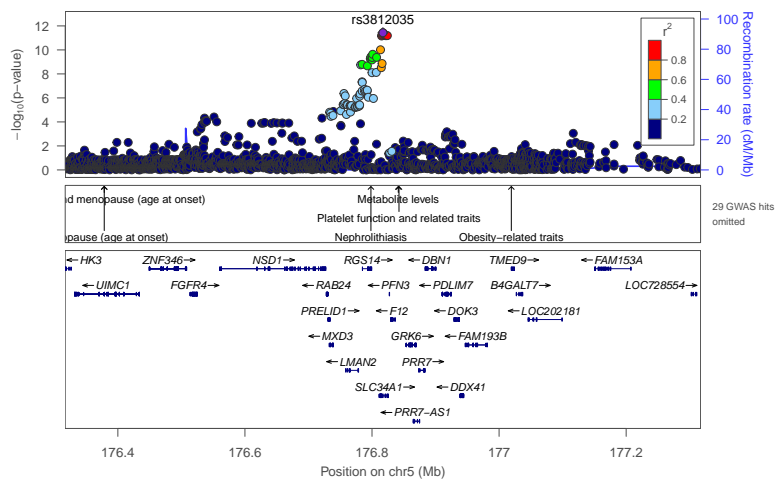

### isoxanthopterin

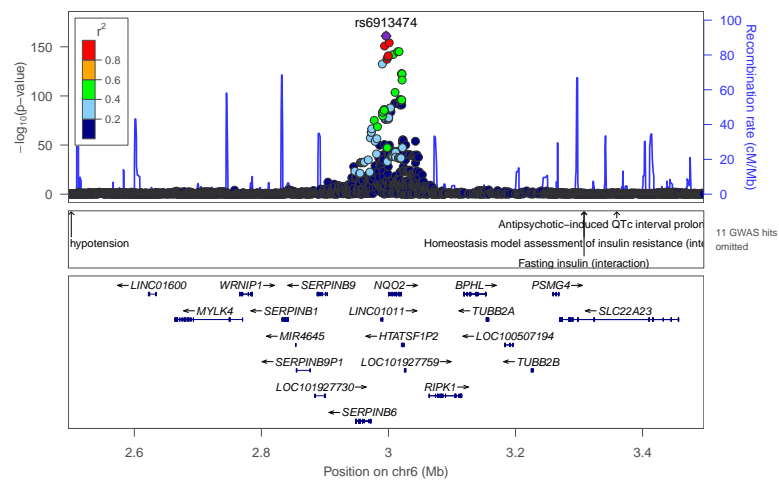



### pterin

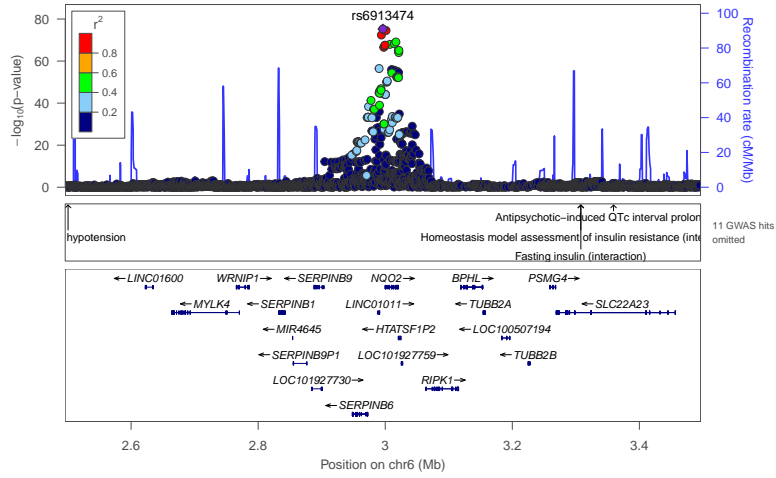

### kynurenine

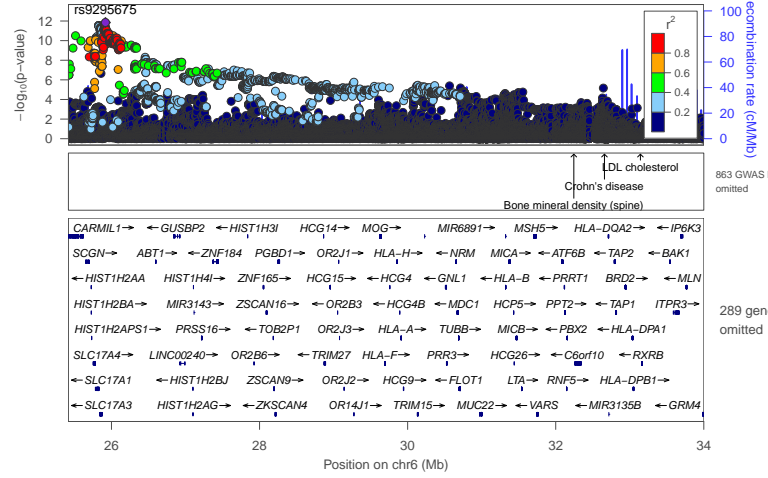

### suberate (C8-DC)

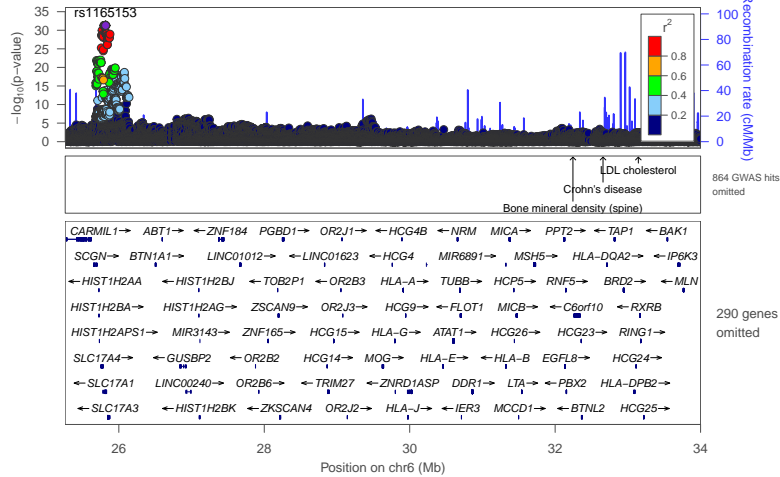

### pyridoxal

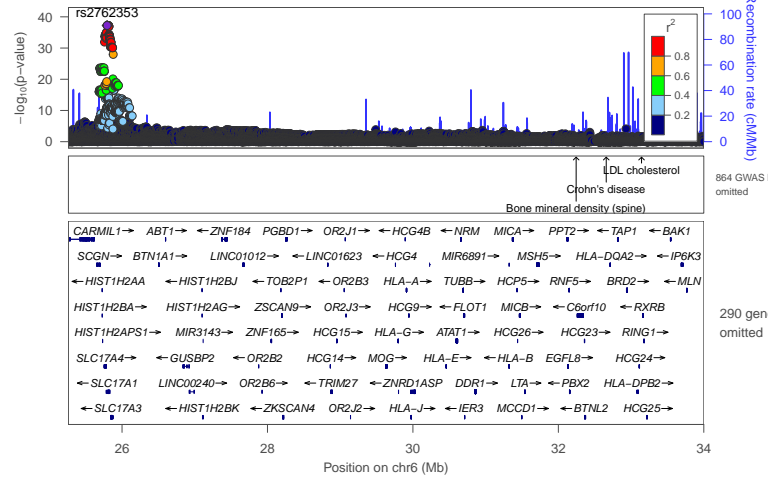

### 4-hydroxyphenylpyruvate

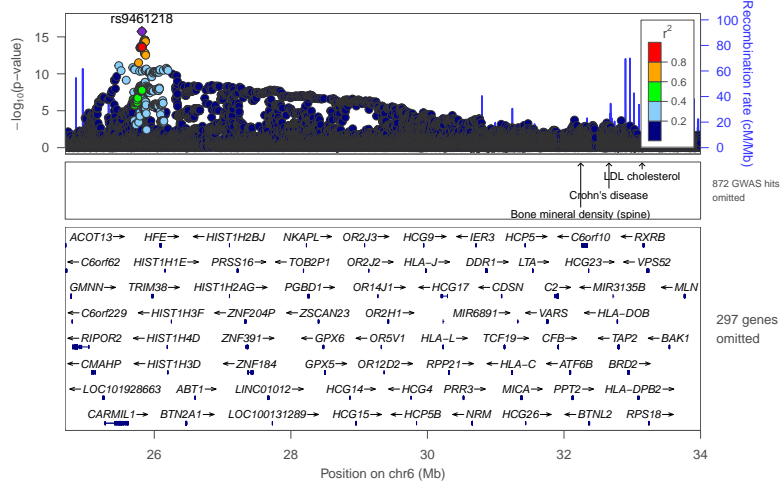

### indolelactate

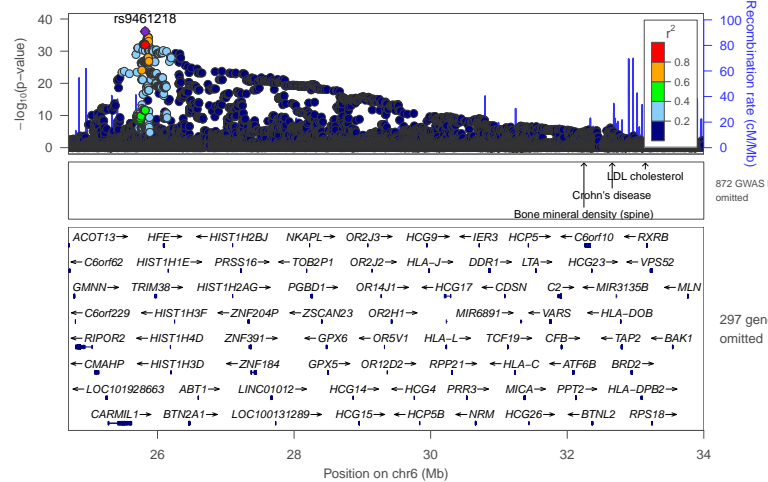

### azelate (C9-DC)

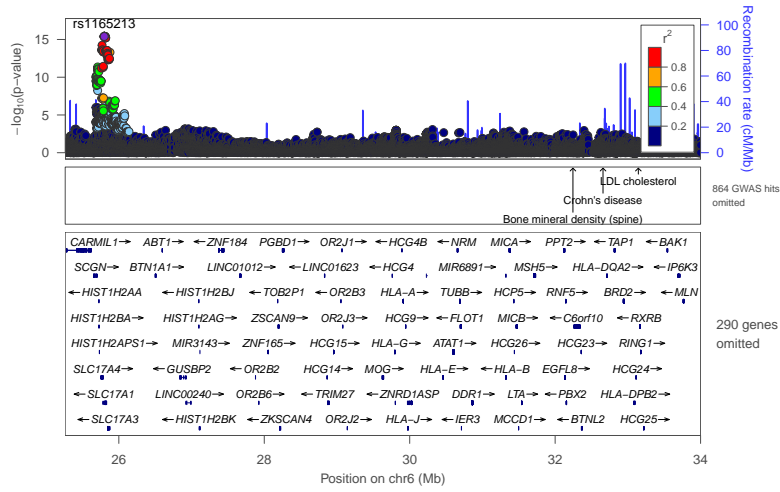

### phenyllactate (PLA)

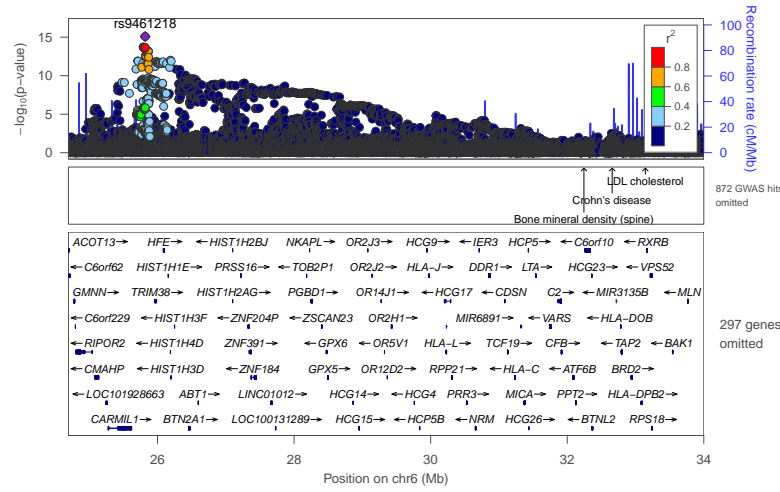

### adenosine 3',5'-cyclic monophosphate (cAMP)

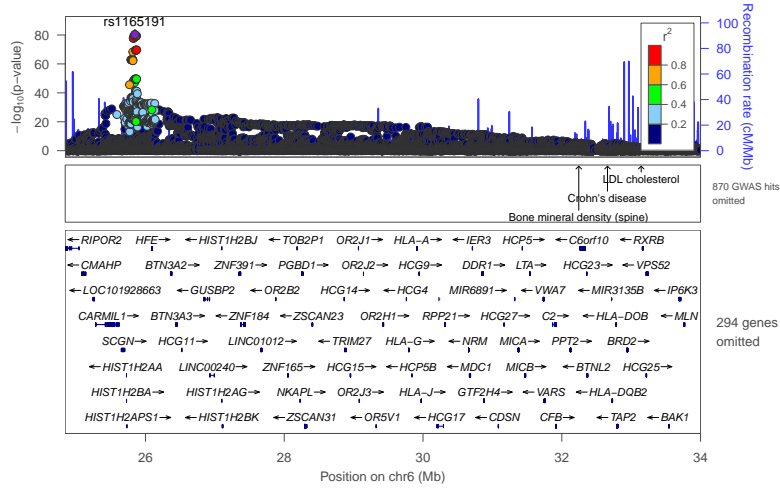

### 3-hydroxysebacate

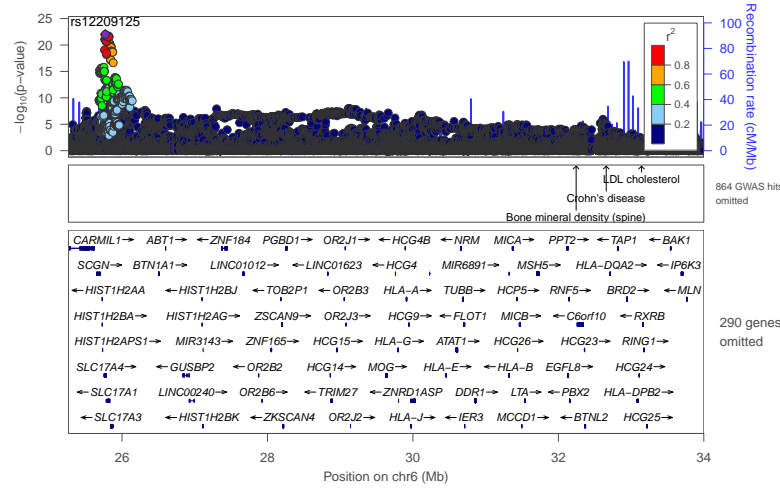

### sebacate (C10-DC)

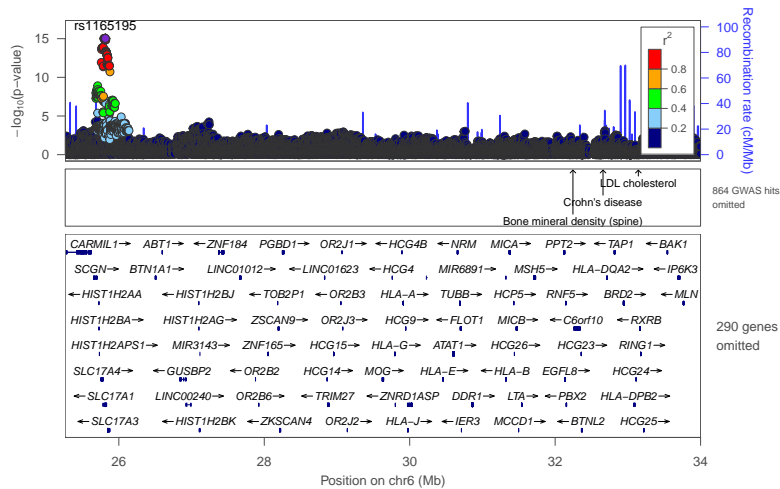

### pregnenediol disulfate (C21H34O8S2)\*

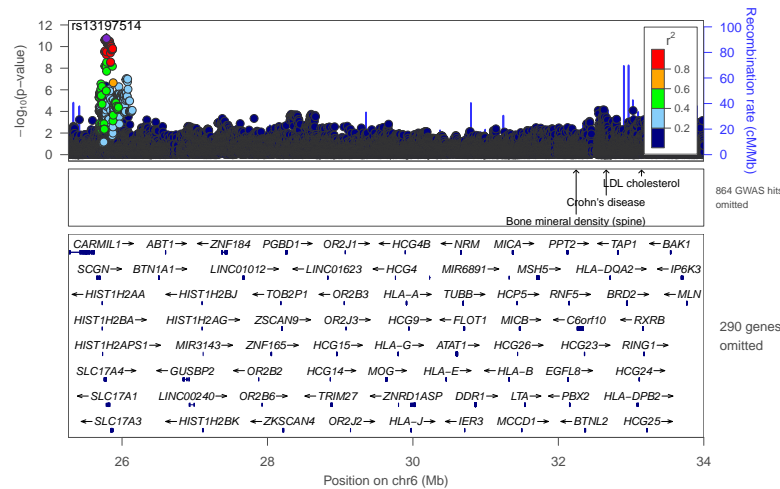

### 21-hydroxypregnenolone disulfate

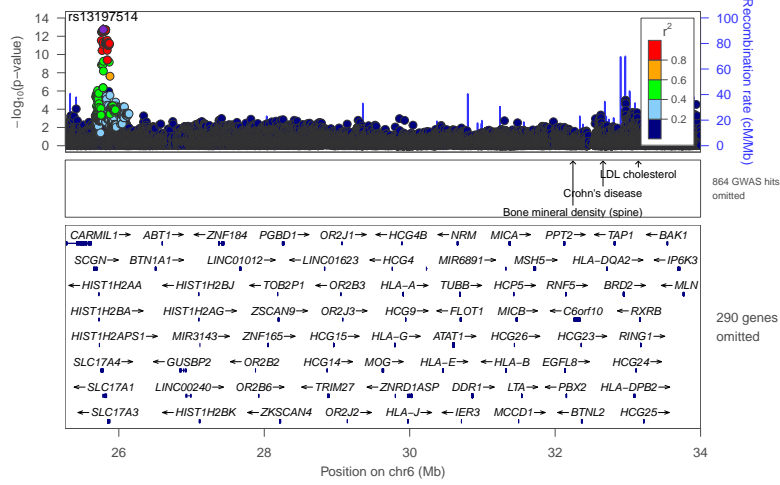

### X - 13866

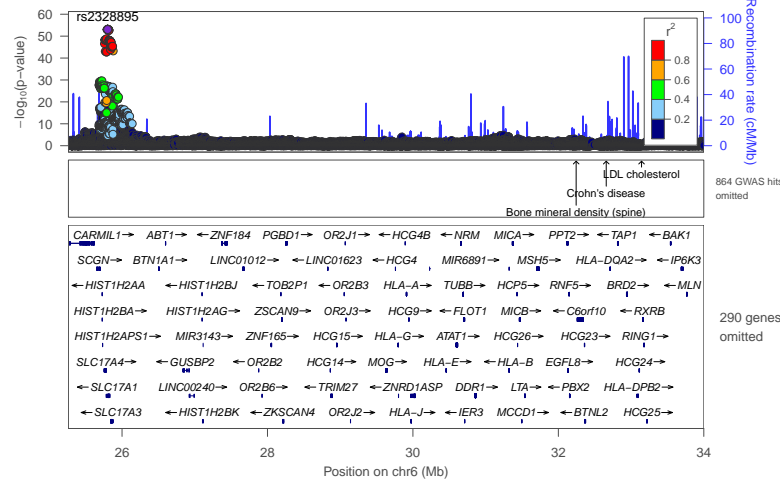

### X - 11470

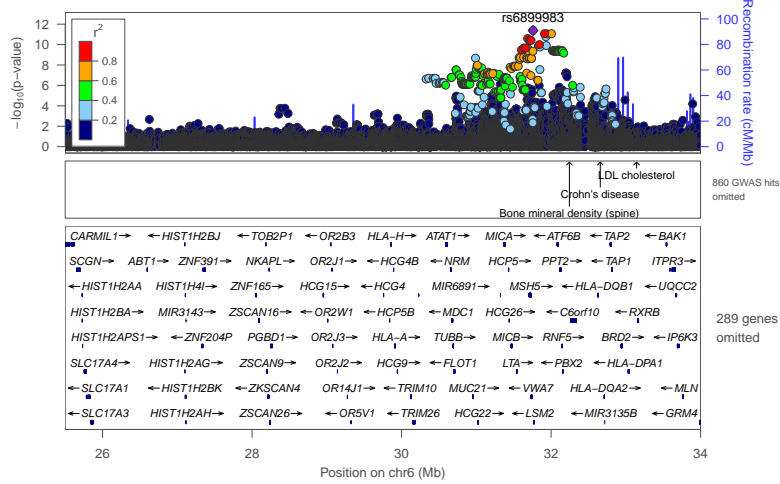

### X - 12822

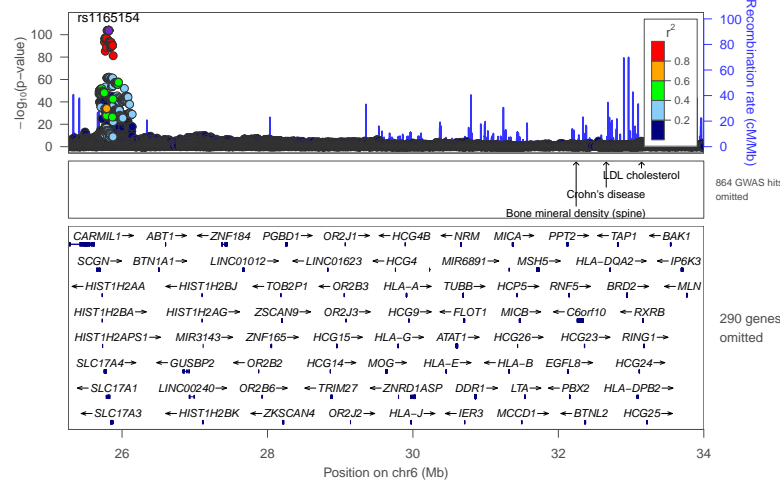

### X - 21829

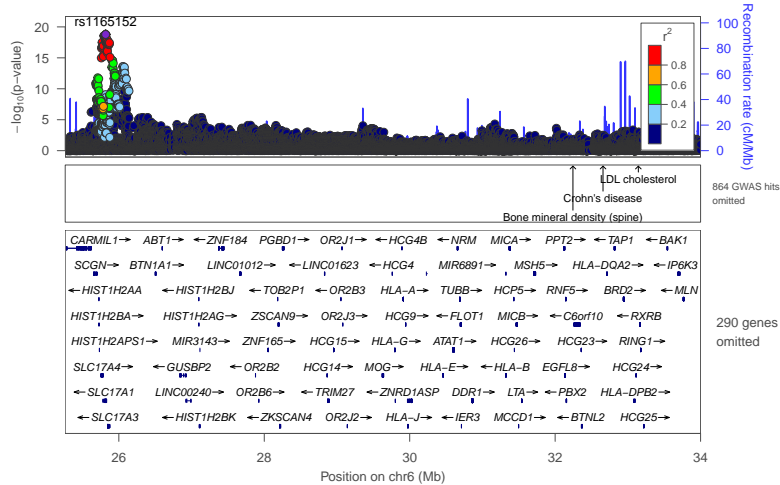

### X - 12839

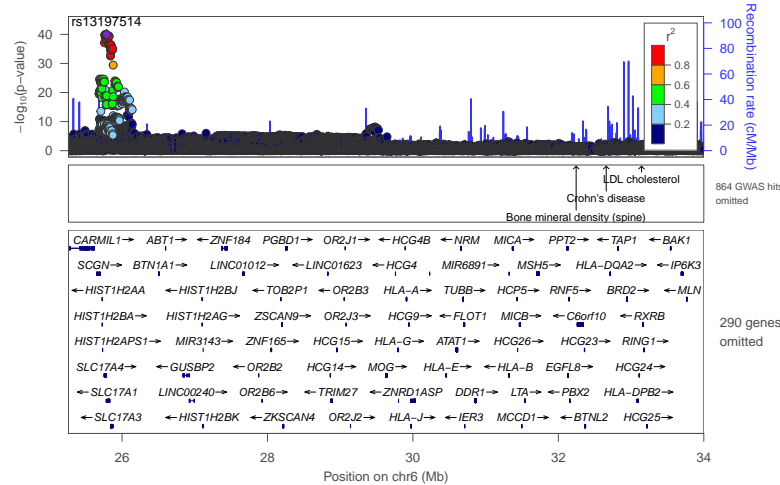

X – 21841

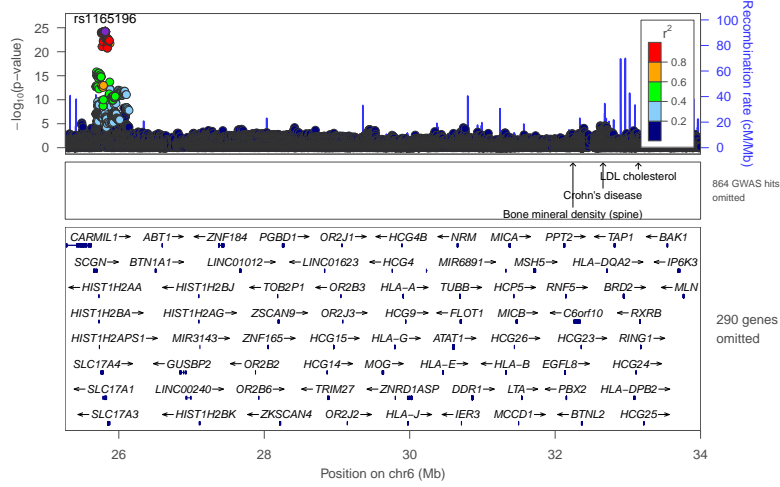

ferulic acid 4-sulfate

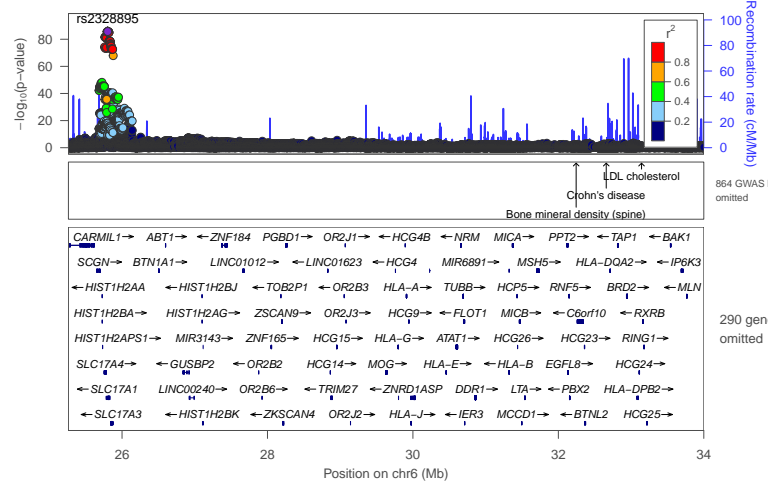

X – 15806

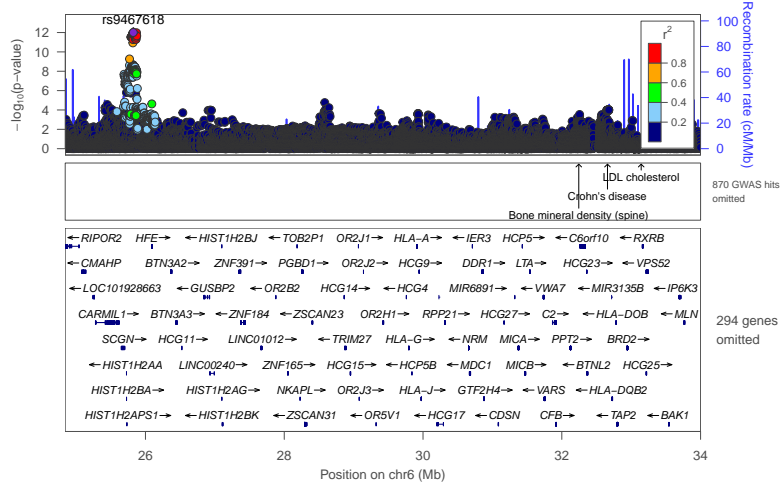

N-acetyl-met-phe

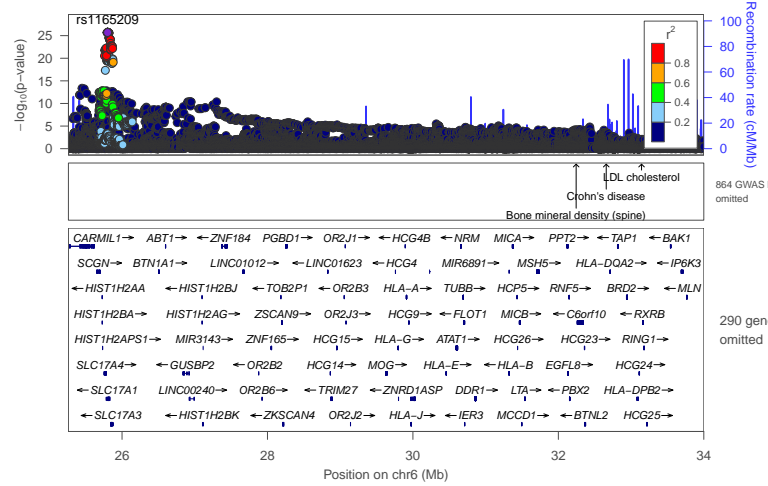

3alpha,21-dihydroxy-5beta-pregnane-11,20-dione 21-glucuronide

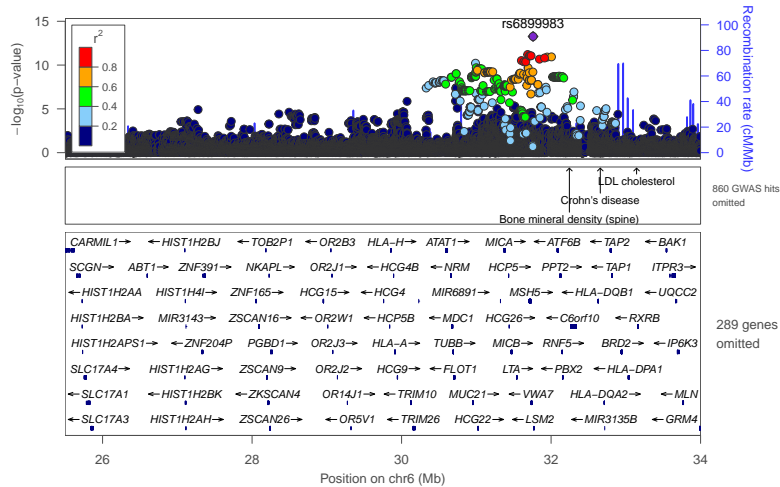

alpha-CEHC sulfate

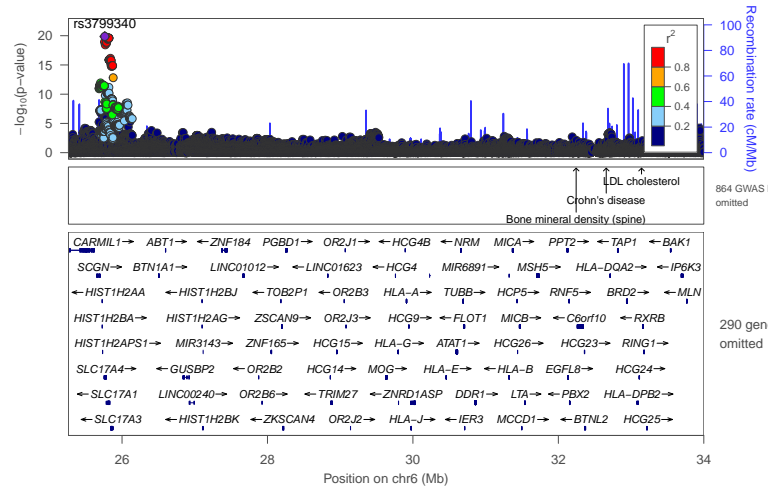

X - 12124

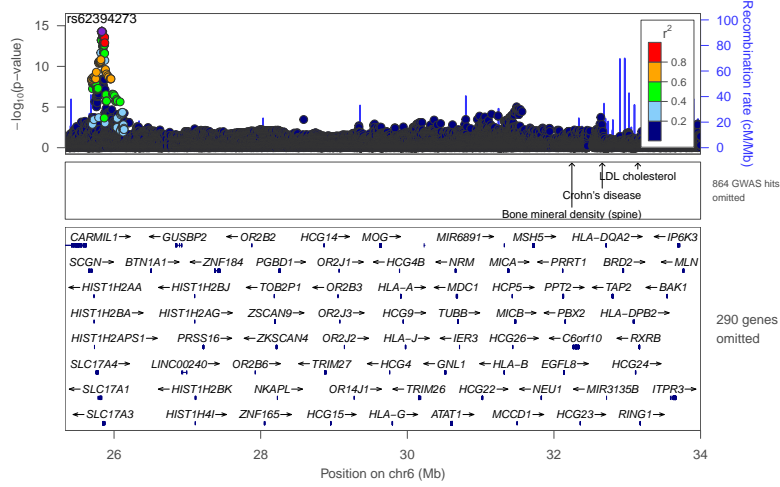

X - 13837

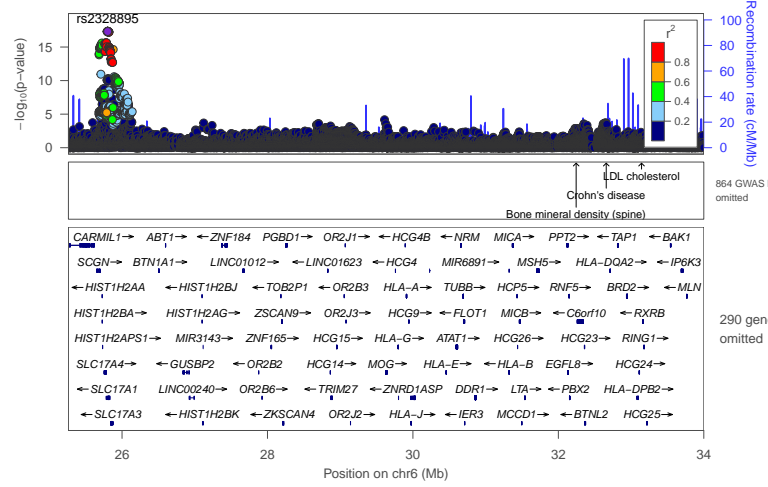

X - 12704

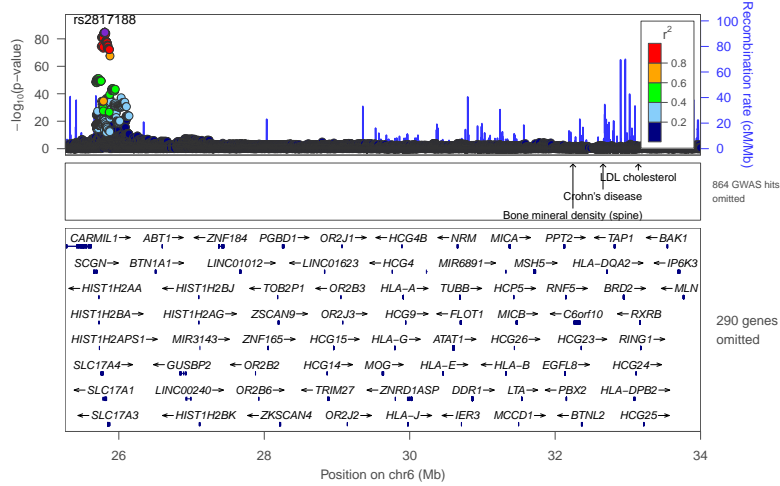

X - 13874

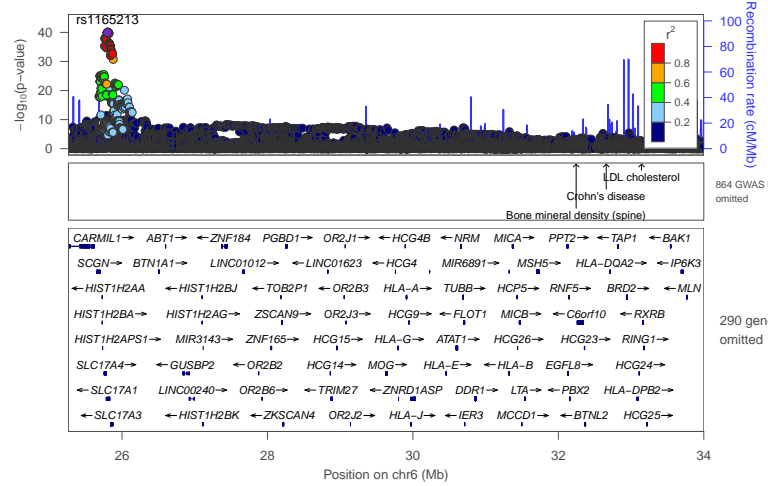

X - 18888

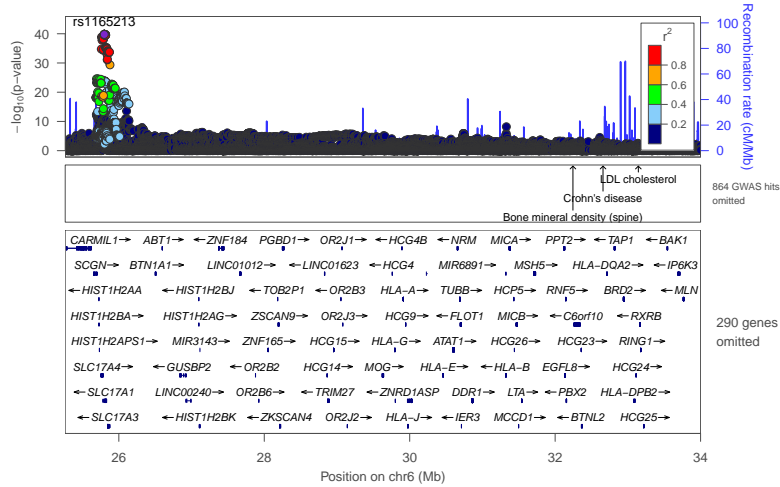

3-hydroxycinnamate sulfate

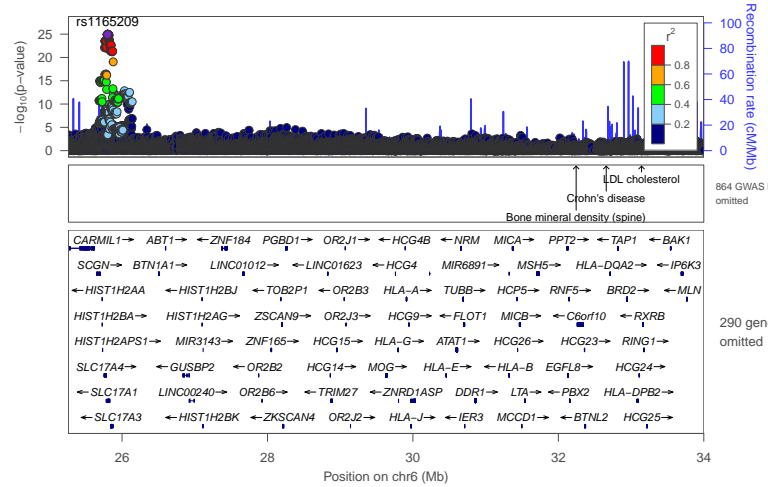



### 4-hydroxycinnamate sulfate

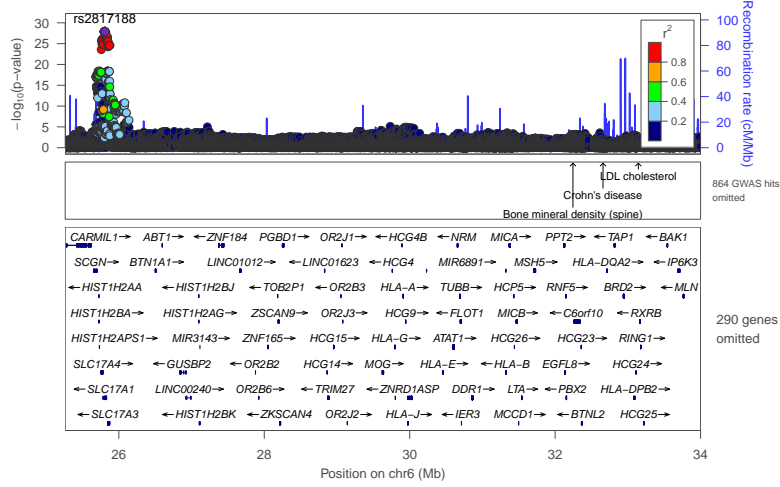

### X - 23518

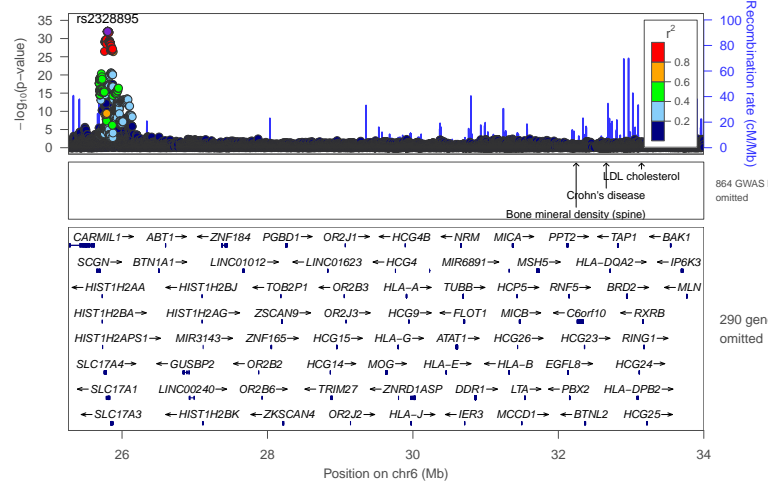

### 2-hydroxysebacate

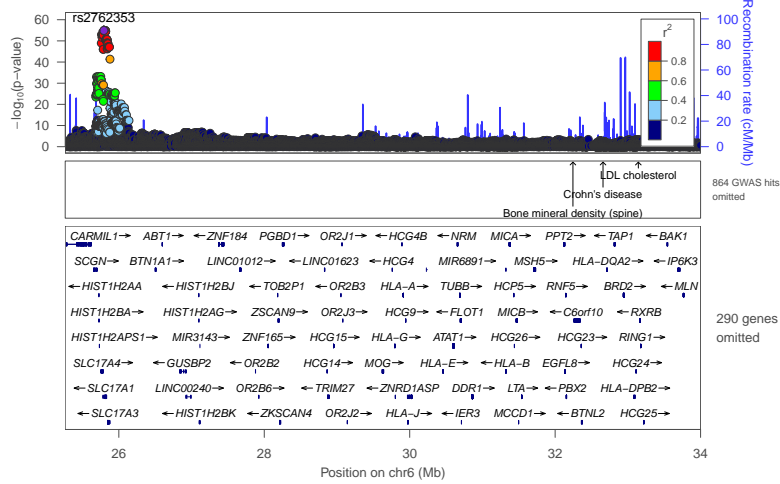

### X - 23787

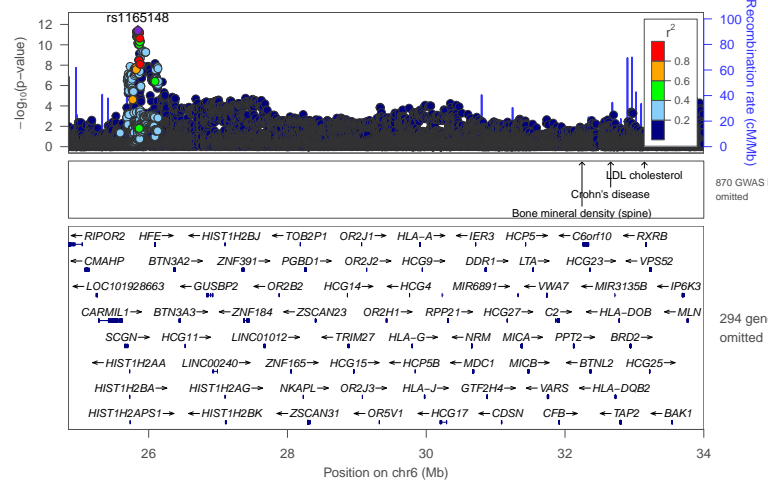

### X - 24339

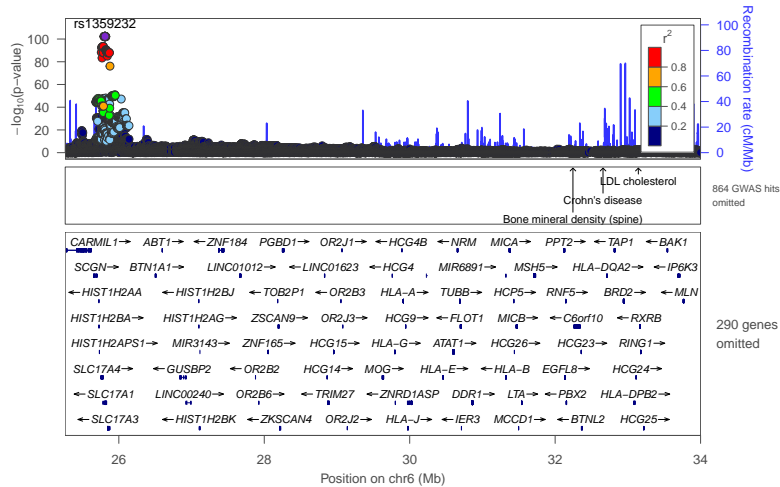

### X - 24345

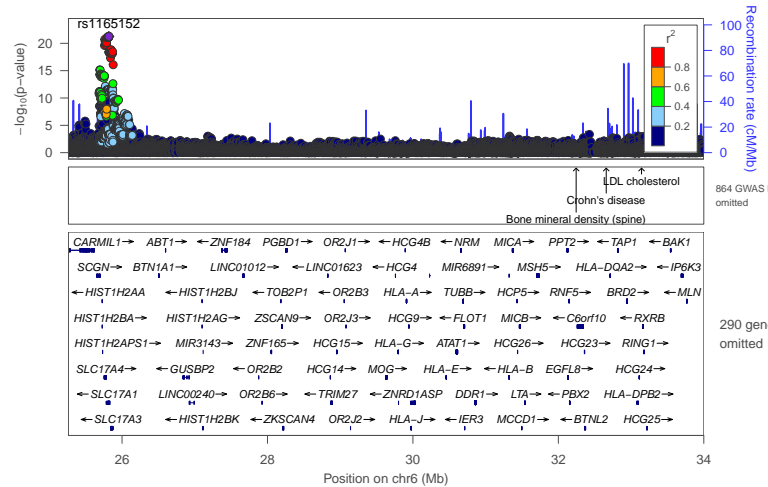



### glutamine conjugate of C9H16O2 (1)\*

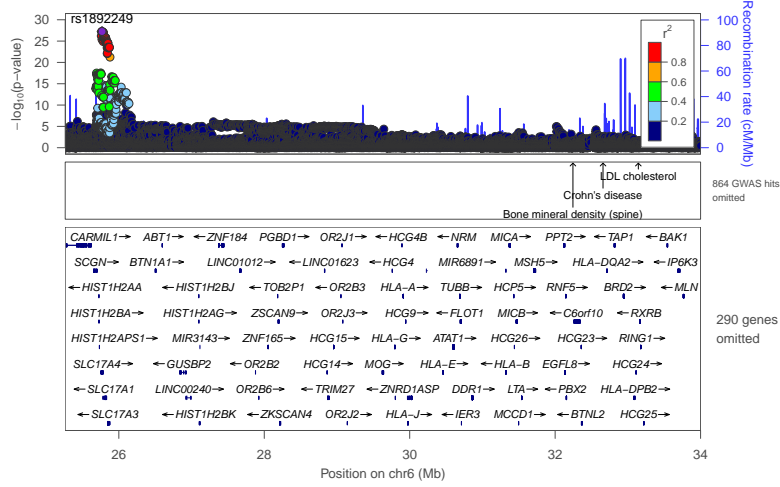

### glutamine conjugate of C10H16O2 (2)\*

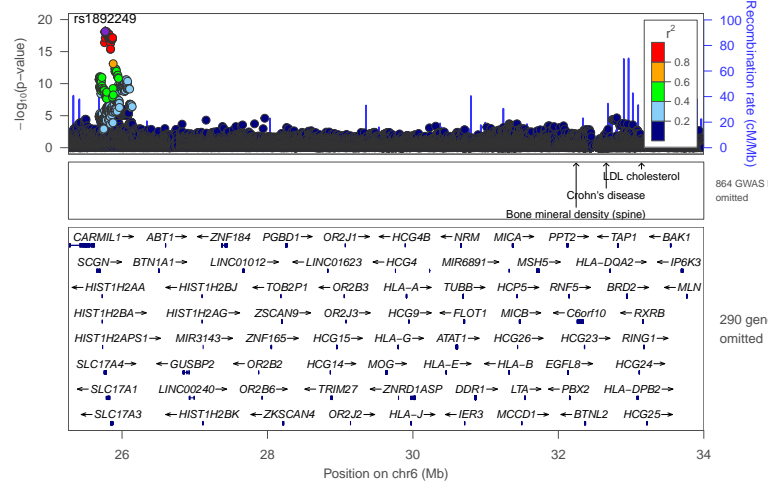

### phenylacetylglutamate

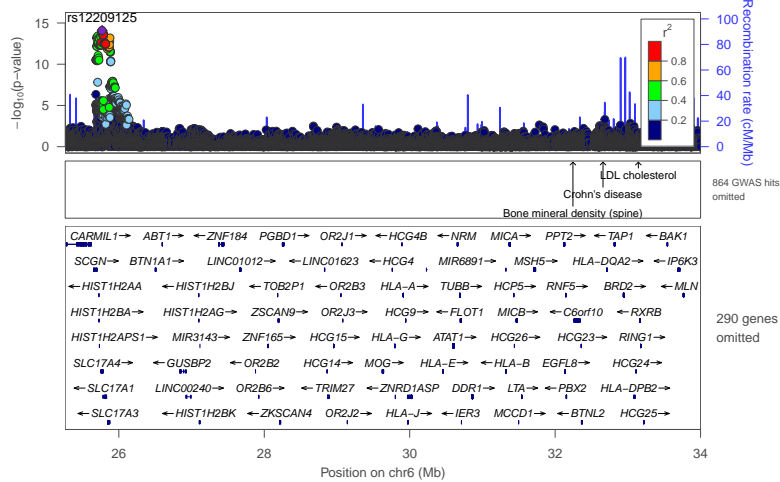

### suberoylcarnitine (C8-DC)

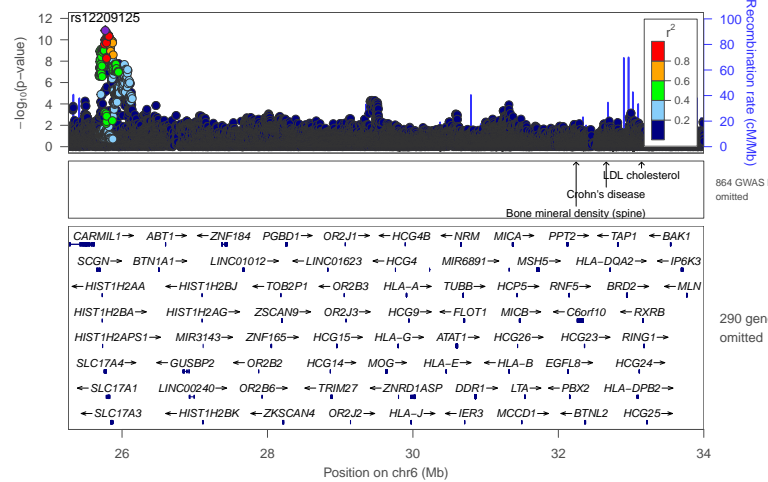

### hexanoylglutamine

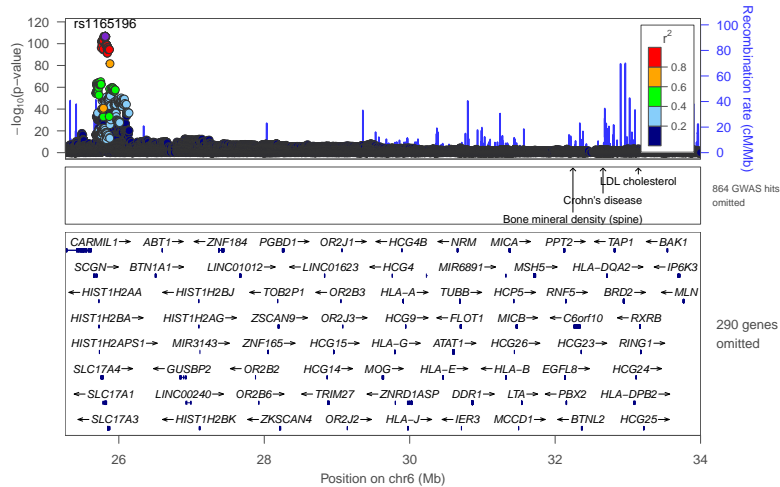

### heptanoylglutamine

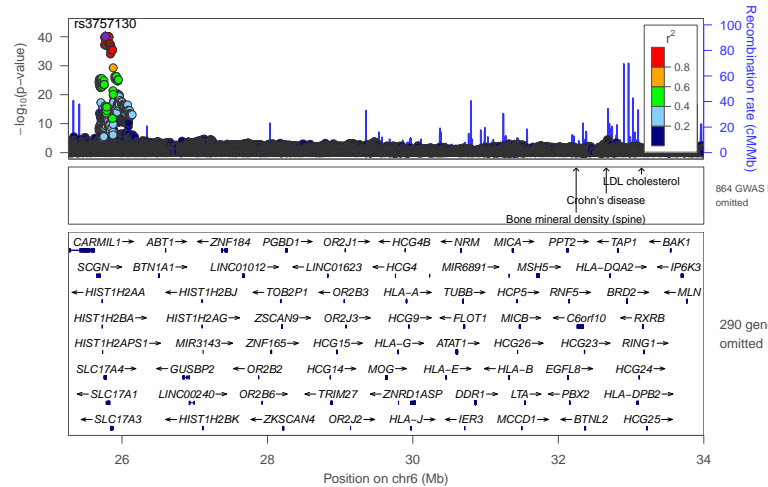

### N-octanoylglutamine

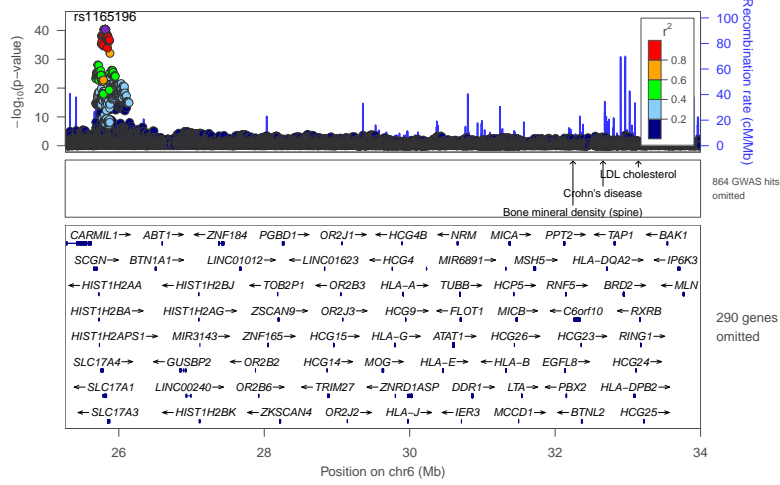

### adenosine

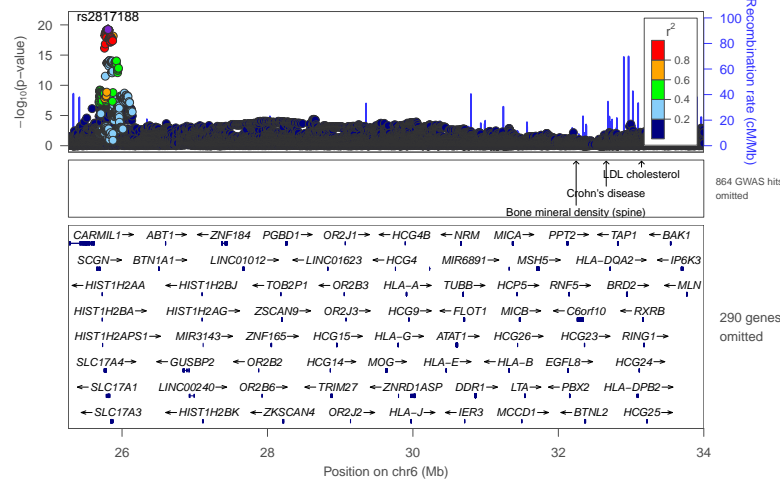

### isocaprolylglutamine

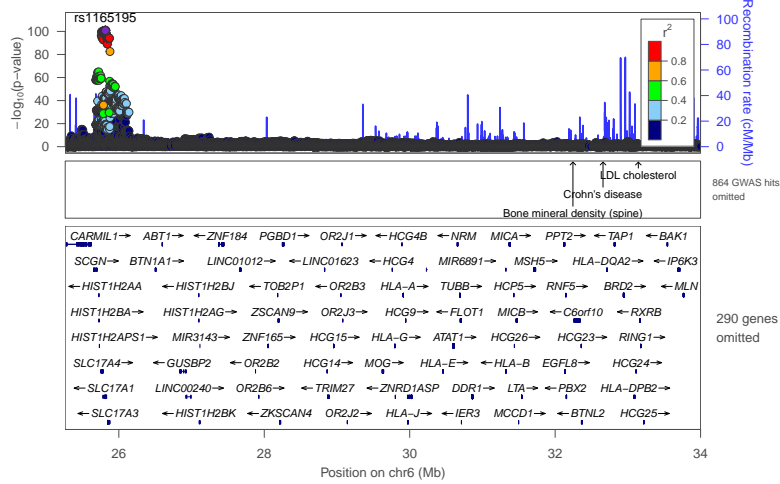

### glutamine conjugate of C8H12O4 (1)\*

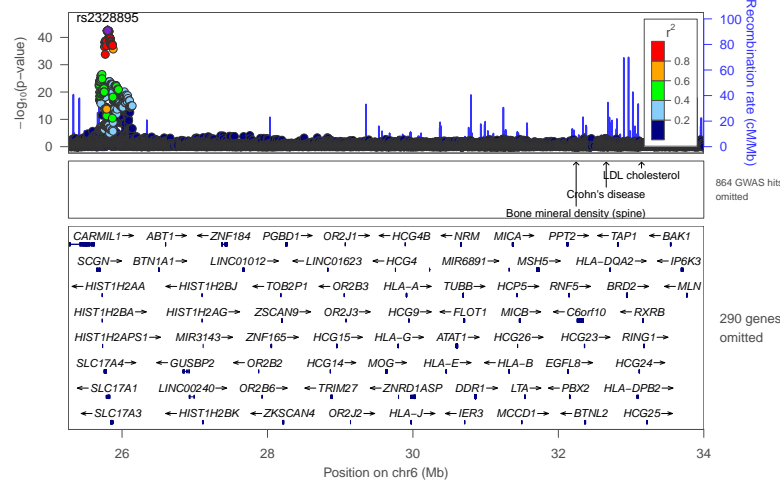

### glutamine conjugate of C8H12O2 (3)\*

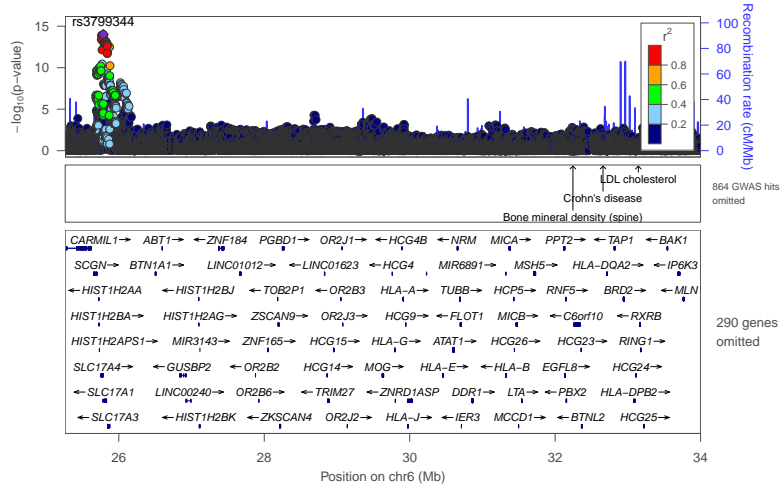

### gamma-CEHC sulfate

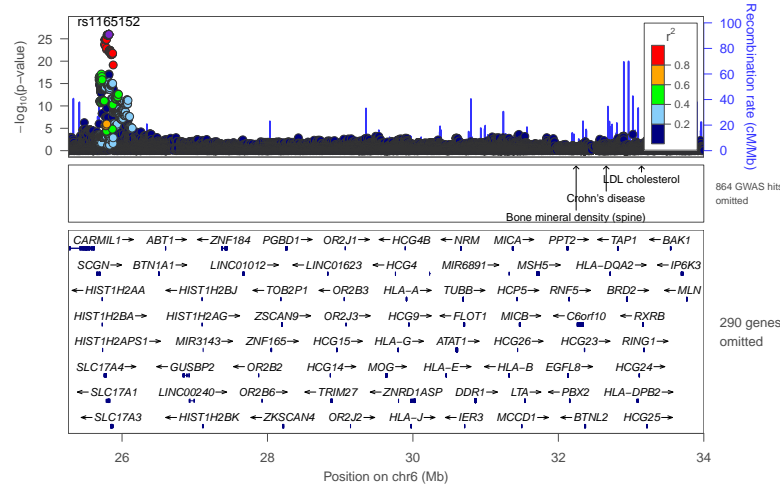

### N-lactoyl leucine

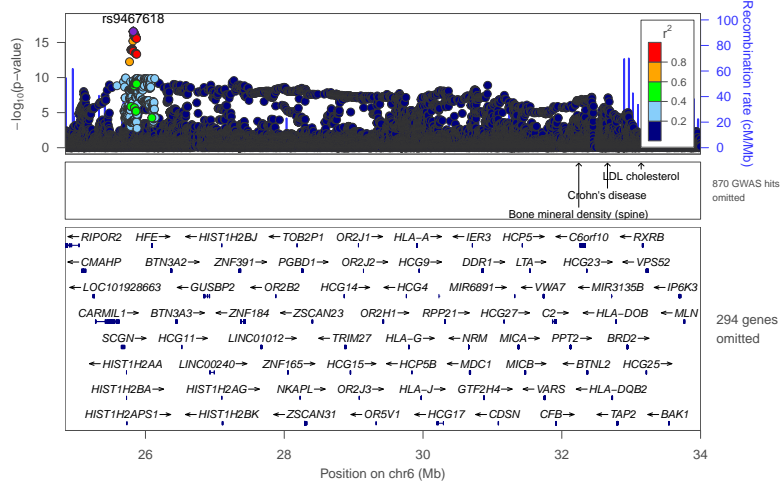

### N-lactoyl valine

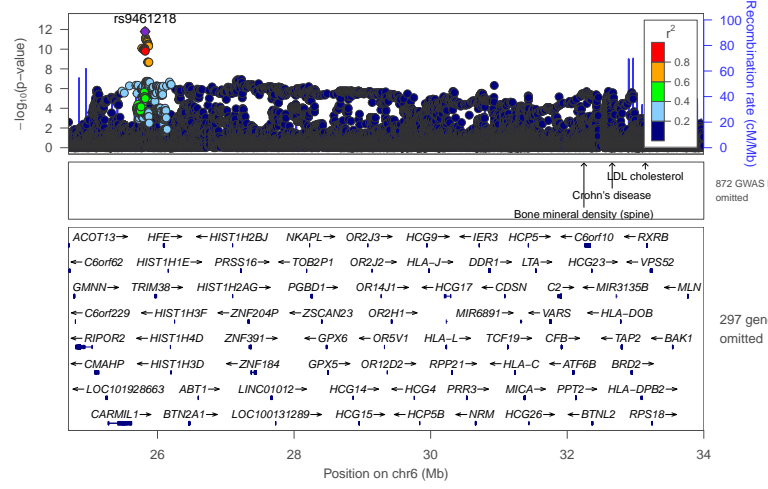

### N-lactoyl tyrosine

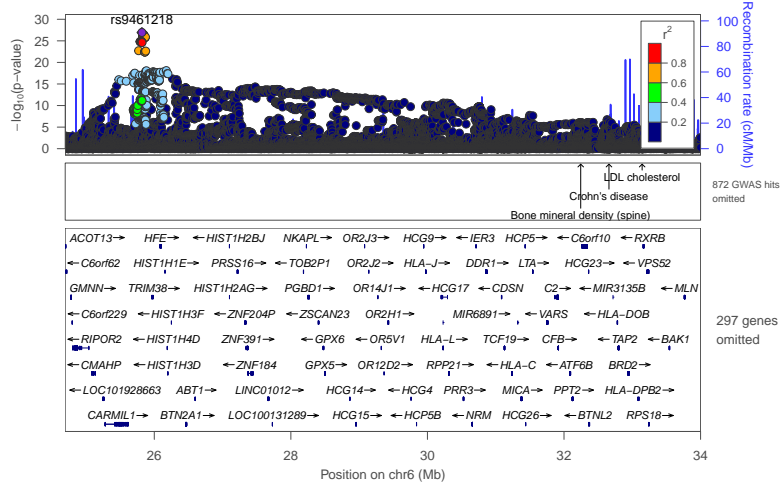

### N-lactoyl phenylalanine

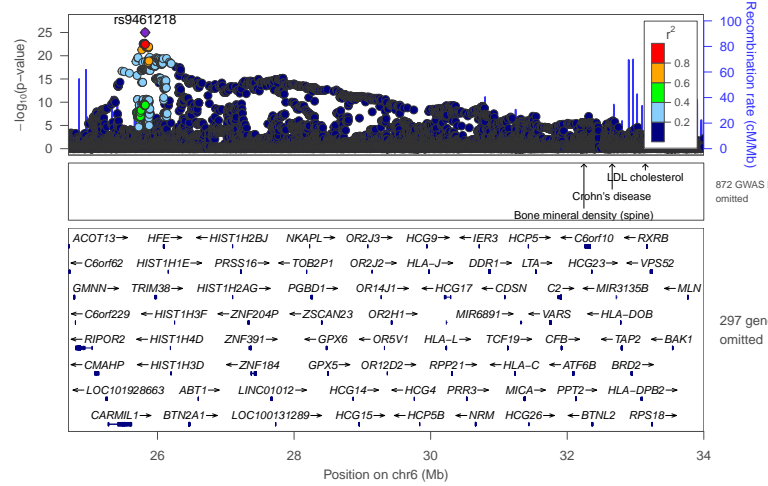

### 4-methylhexanoylglutamine

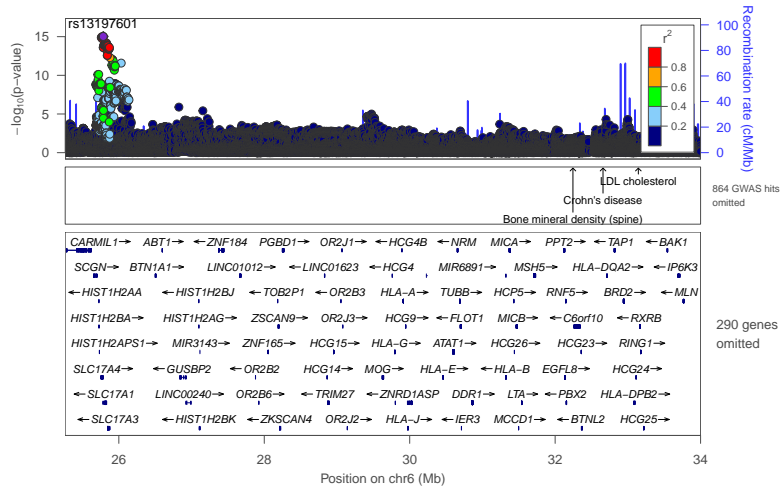

### cyclo(leu-asp)\*

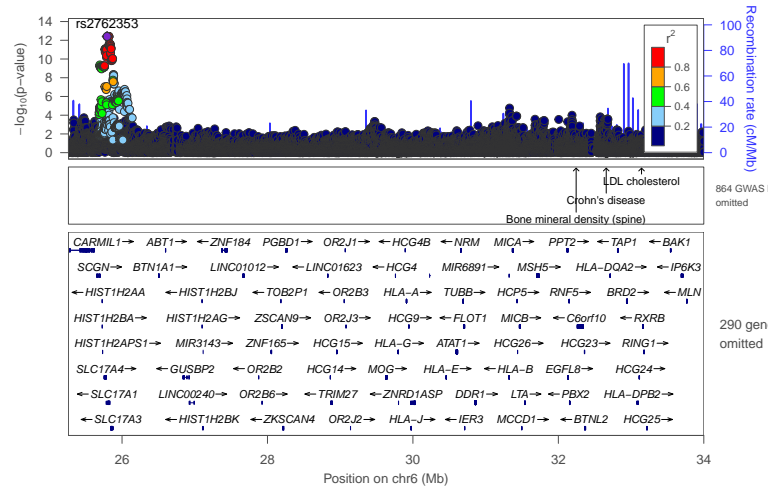

### dihydroferulic acid sulfate

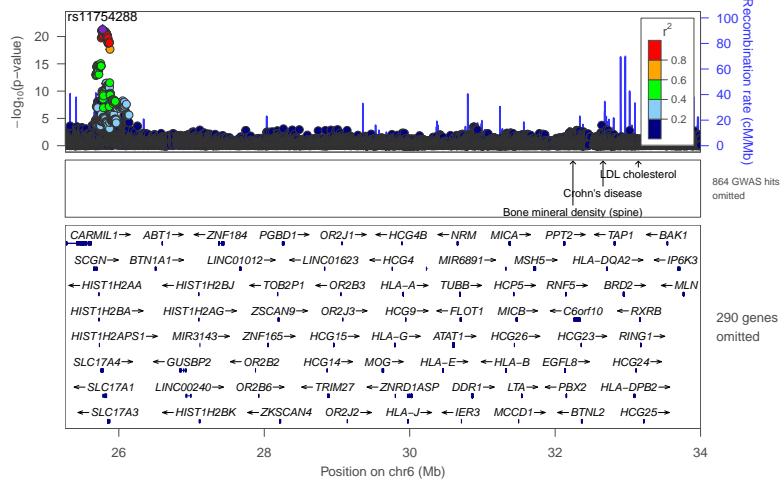

### 3-formylindole

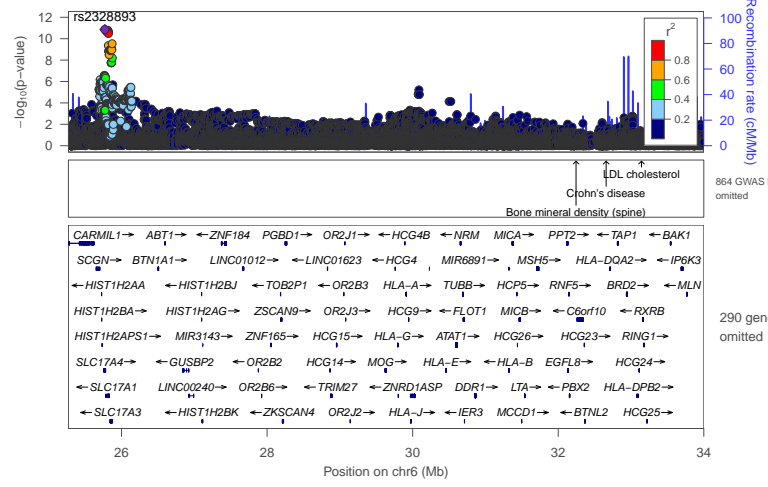

### 3-hydroxydodecanedioate\*

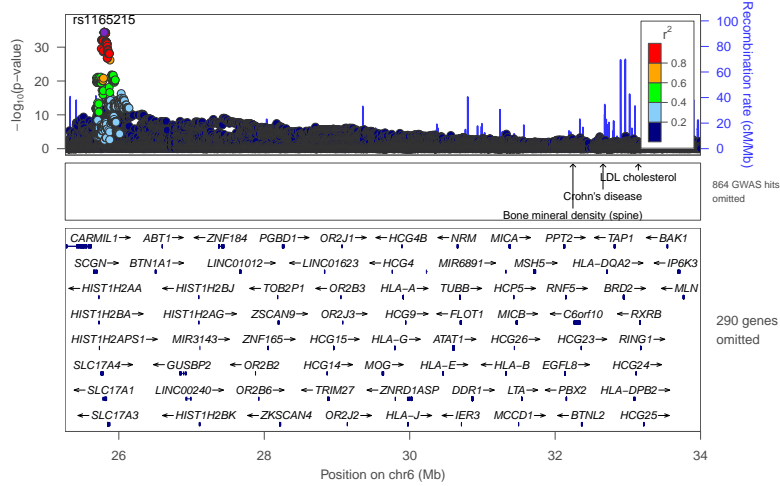

### X - 24515

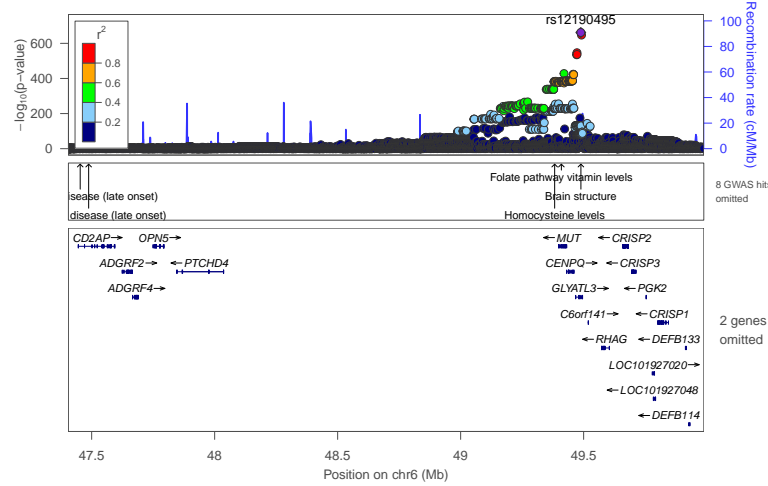

### N-acetylcarnosine

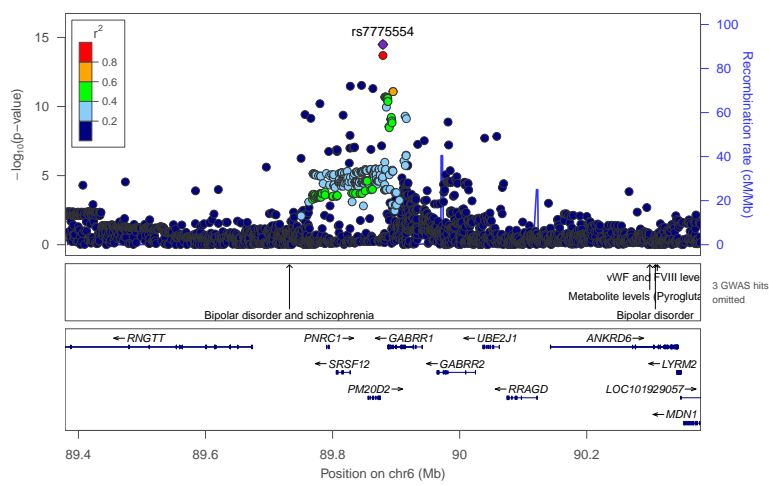

### S-adenosylhomocysteine (SAH)

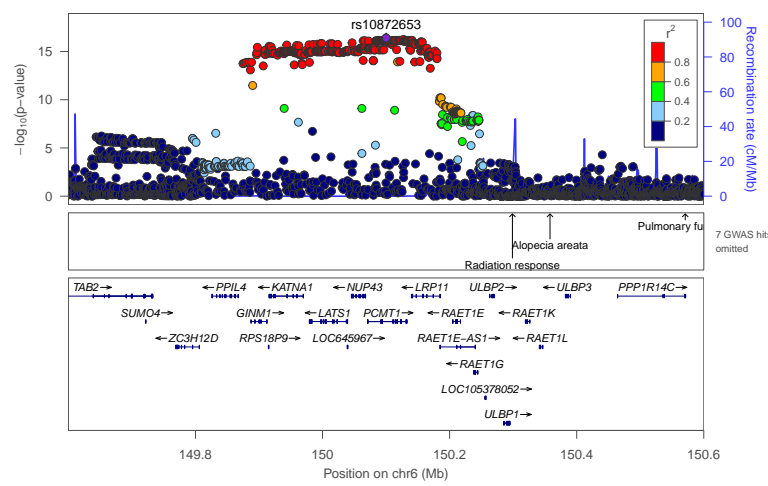

X - 12097

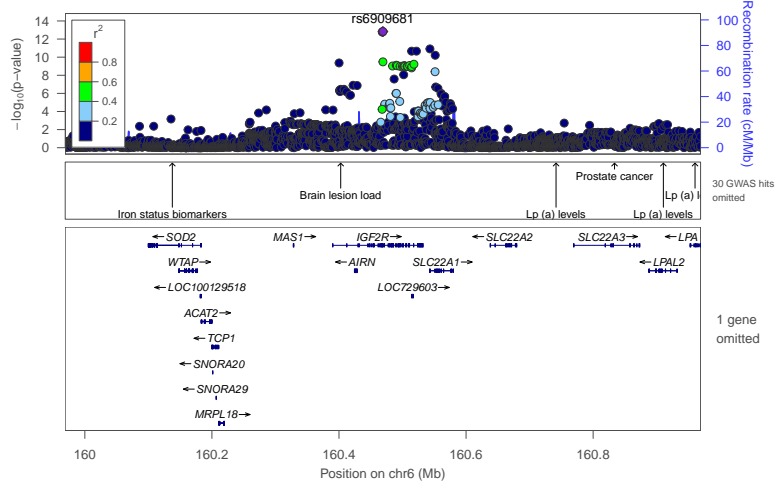

nicotinamide riboside

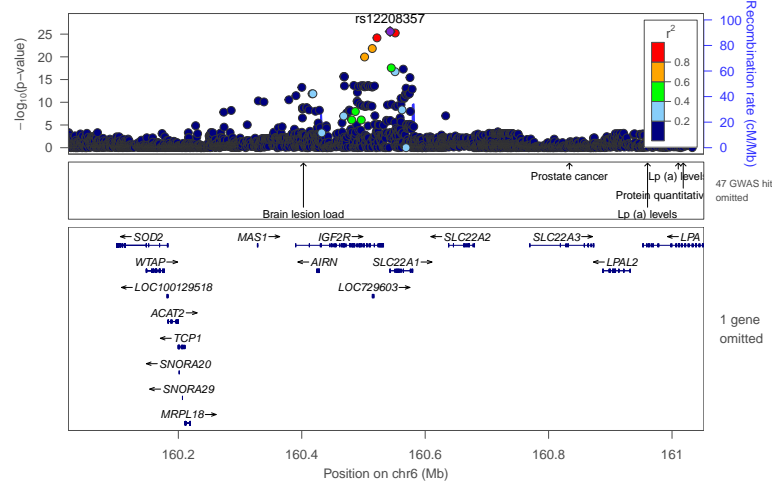

X - 17323

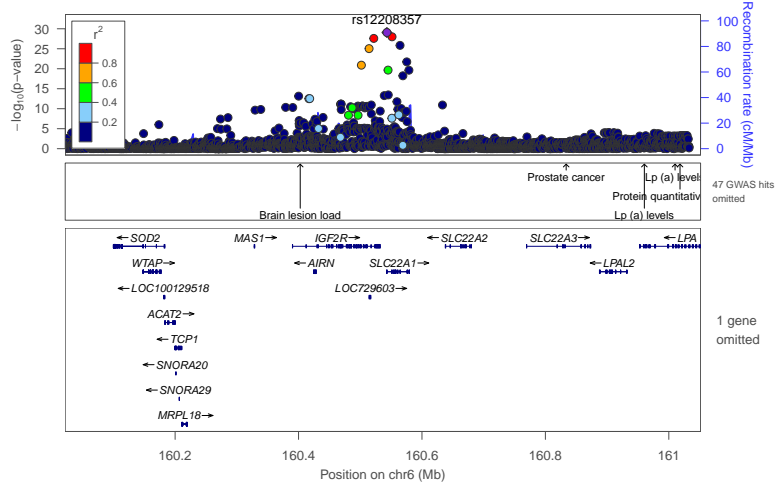

X - 24470

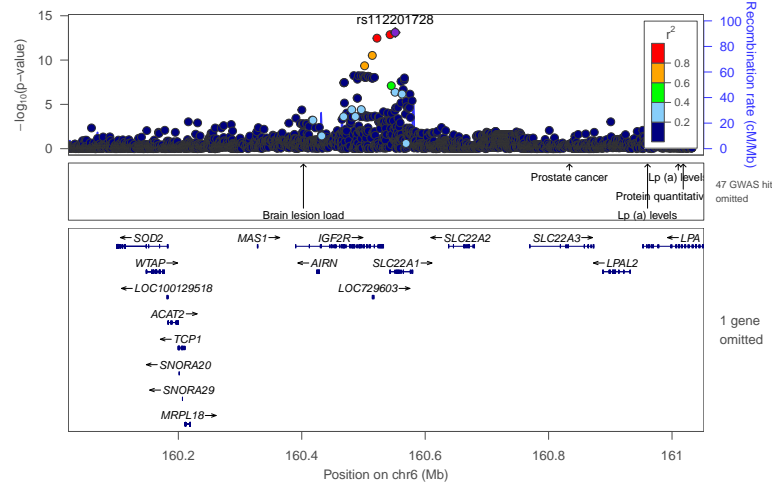

adipoylcarnitine (C6-DC)

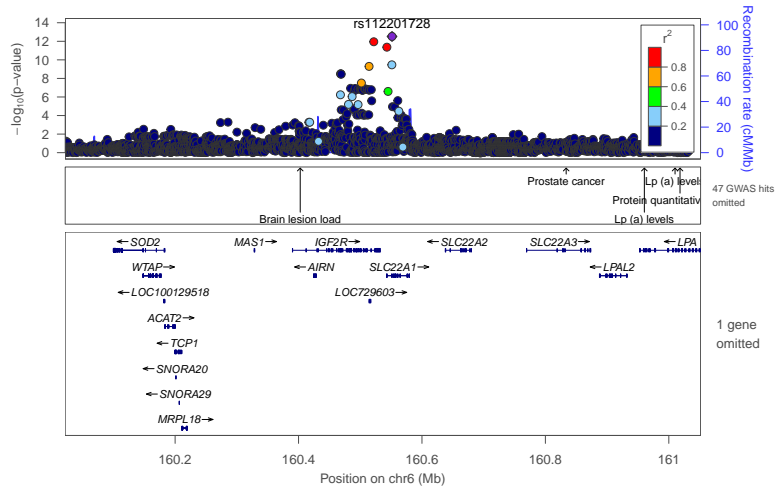

suberoylcarnitine (C8-DC)

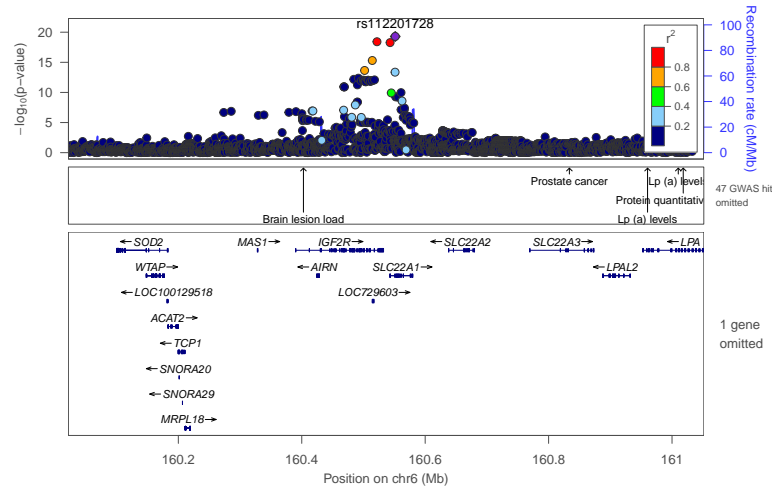

**pimeloylcarnitine/3-methyladipoylcarnitine (C7-DC)**

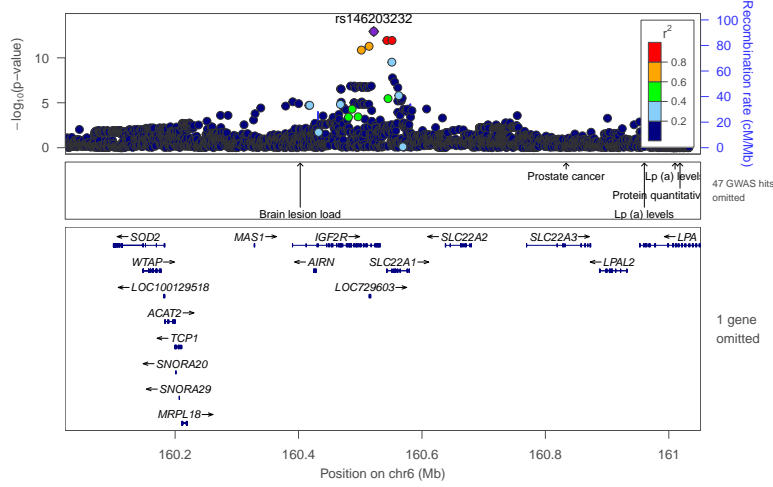

**argininate\***

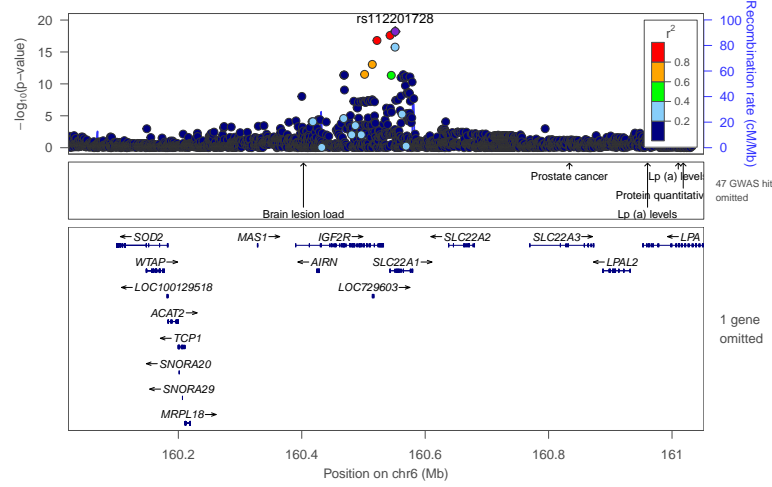

**diacetylspermidine\***

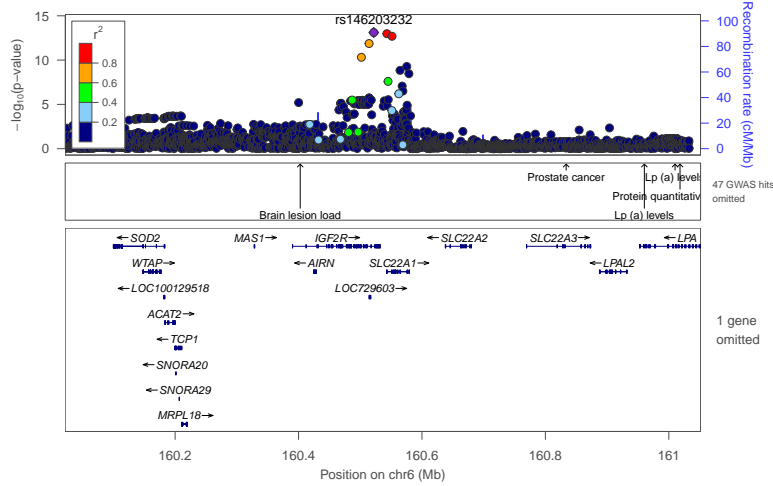

**isobutyrylcarnitine (C4)**

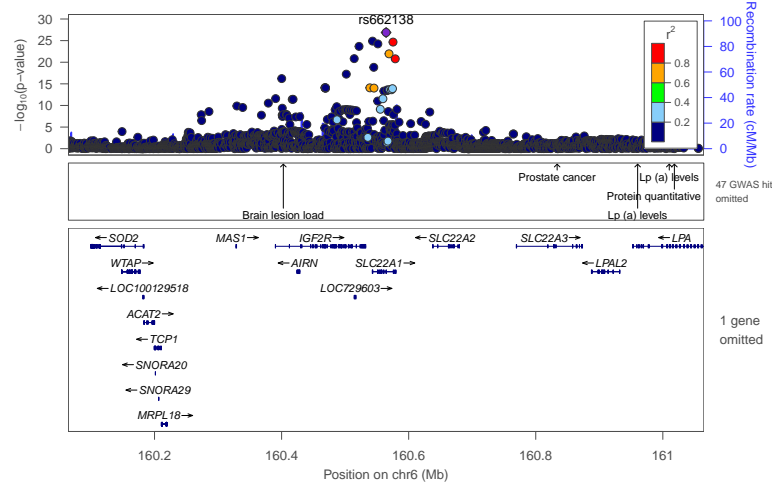

**acisoga**

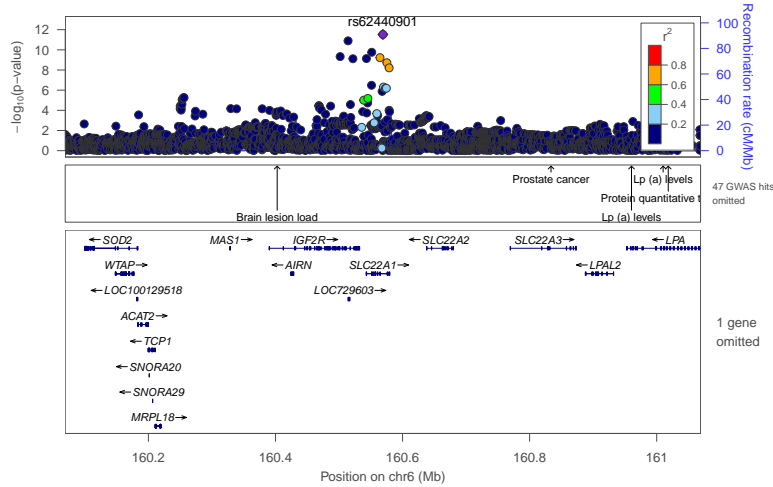

**methylsuccinoylcarnitine**

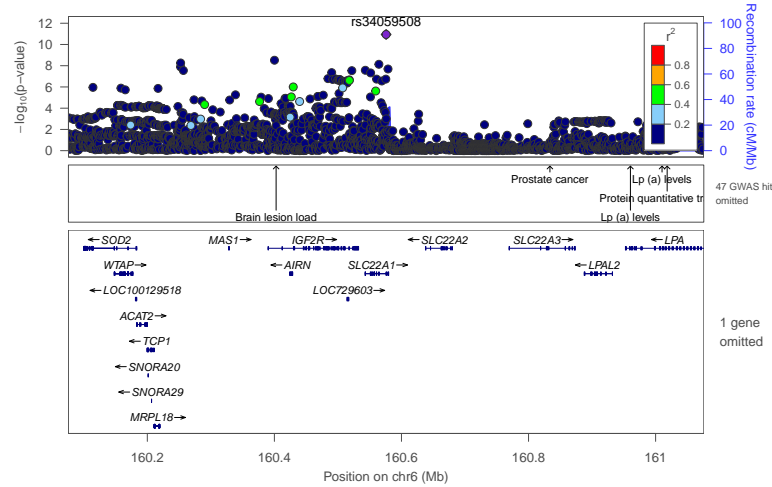



### N-acetylglucosamine/N-acetylgalactosamine

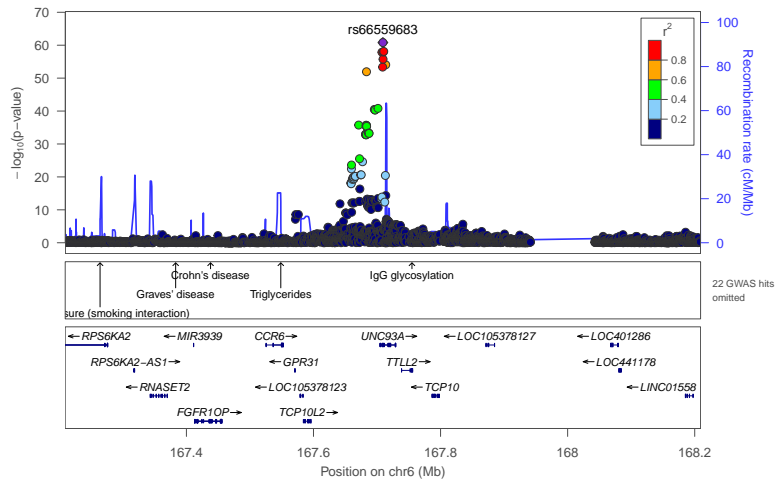

### N-acetylglucosaminylasparagine

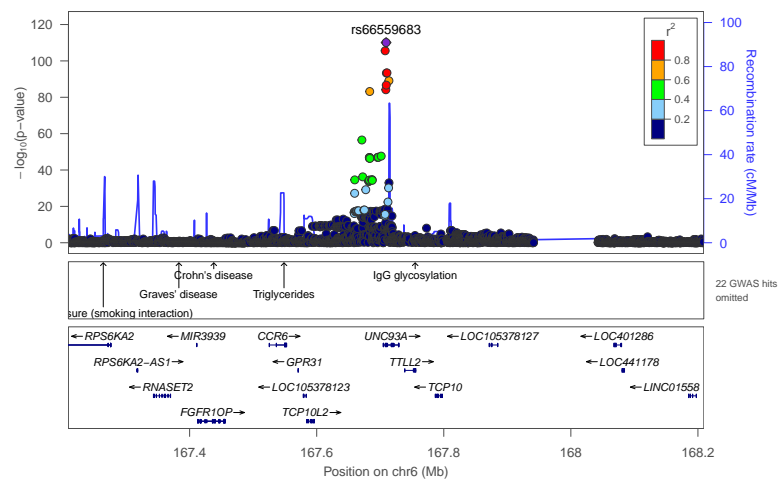

### adipate (C6-DC)

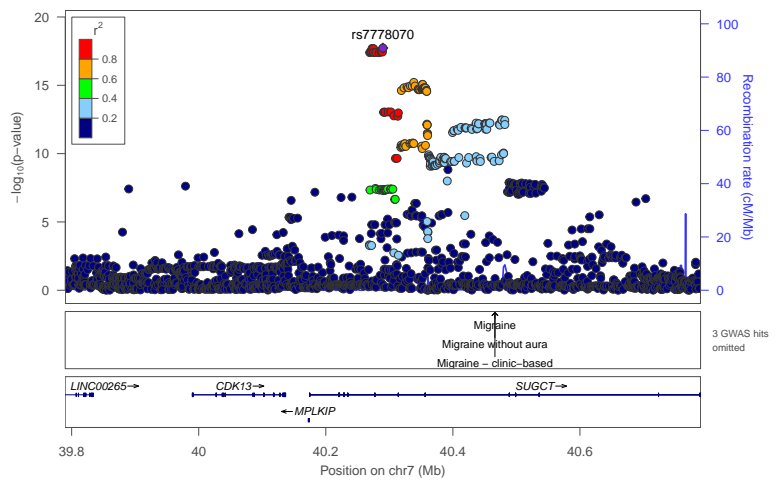

### tyramine

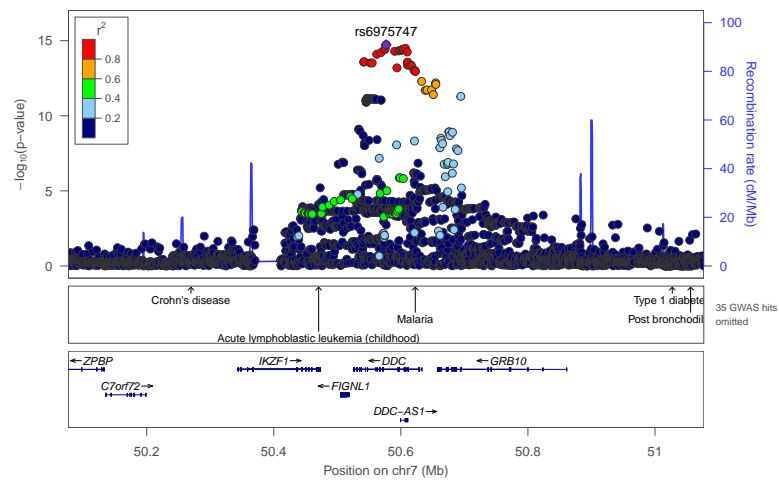

### argininosuccinate

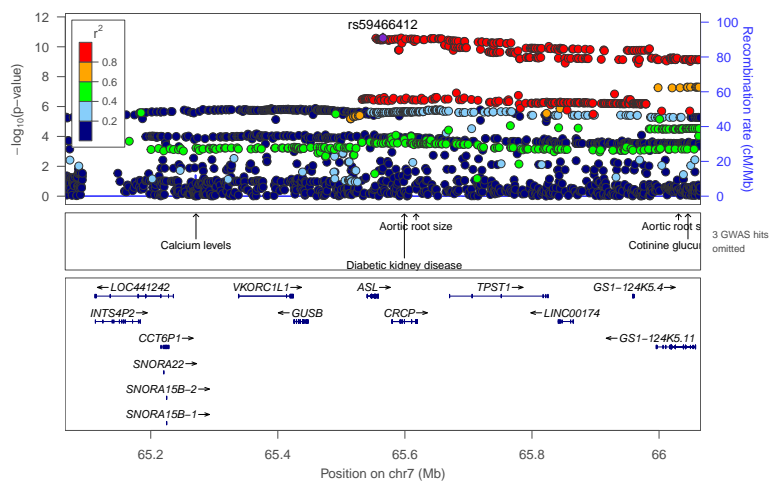

### glucuronide of C10H18O2 (12)\*

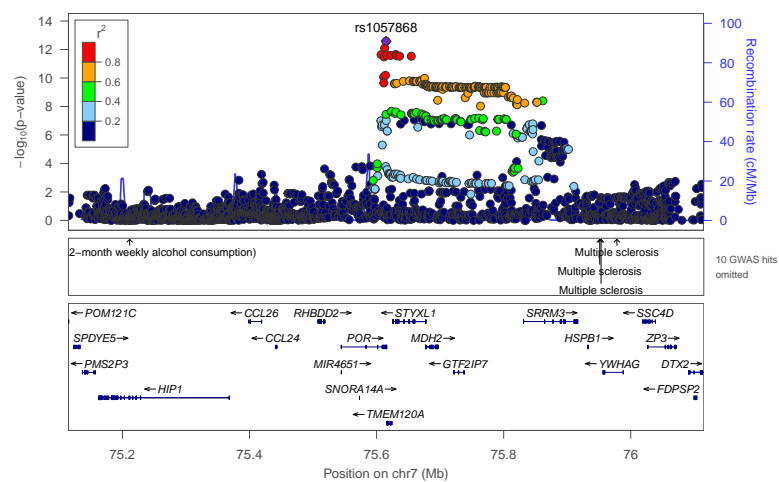

### laurylcarnitine (C12)

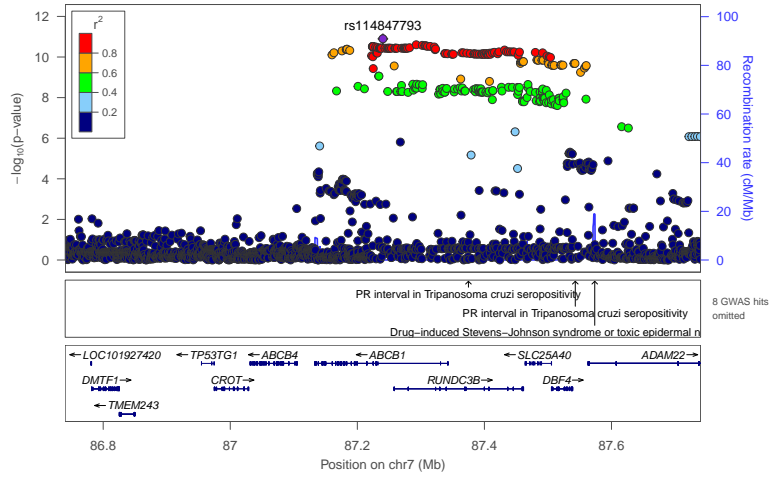

### X - 21286

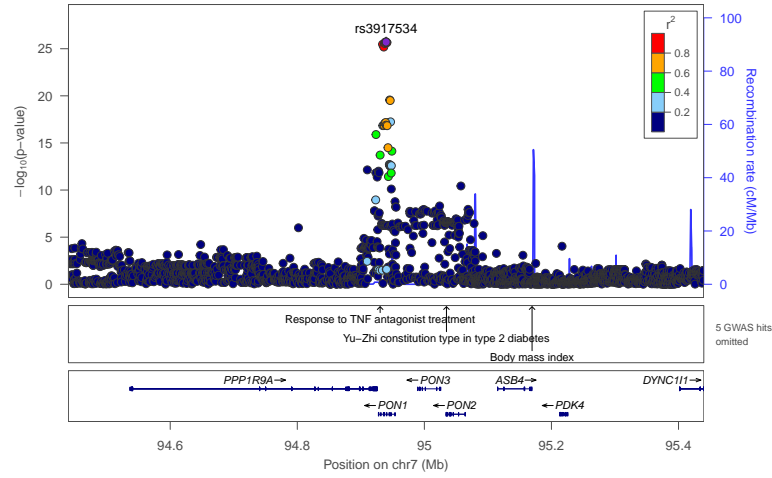

### 5alpha-androstan-3beta,17beta-diol disulfate

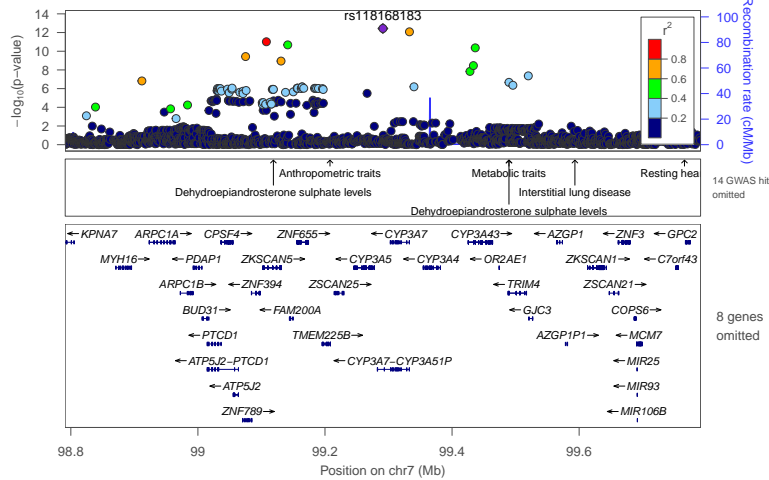

### etiocholanolone glucuronide

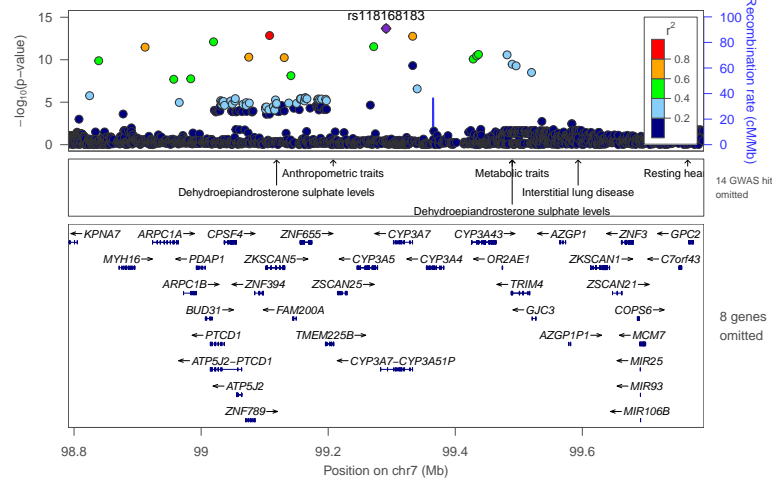

### X - 23787

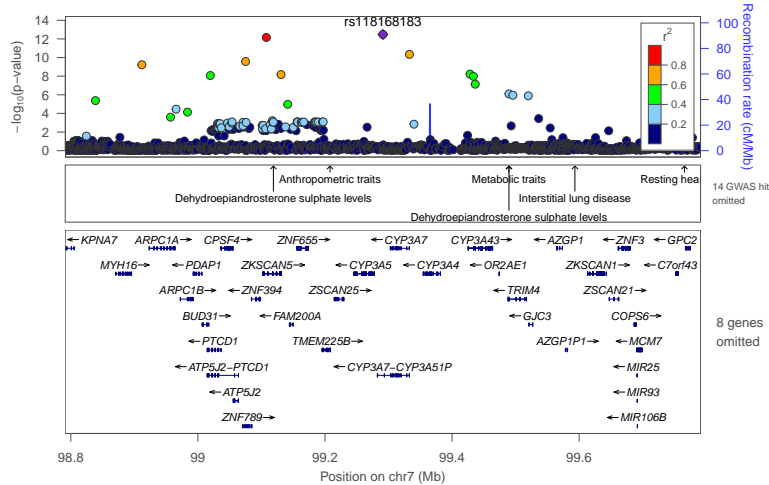

### andro steroid monosulfate C19H28O6S (1)\*

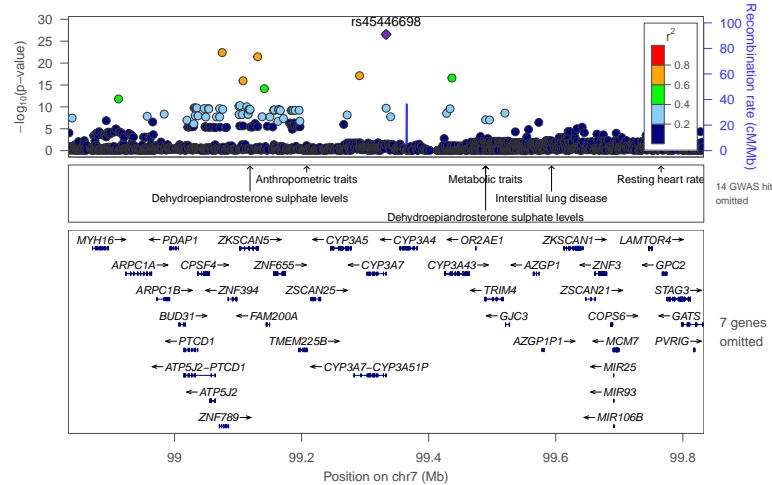

### epiandrosterone sulfate

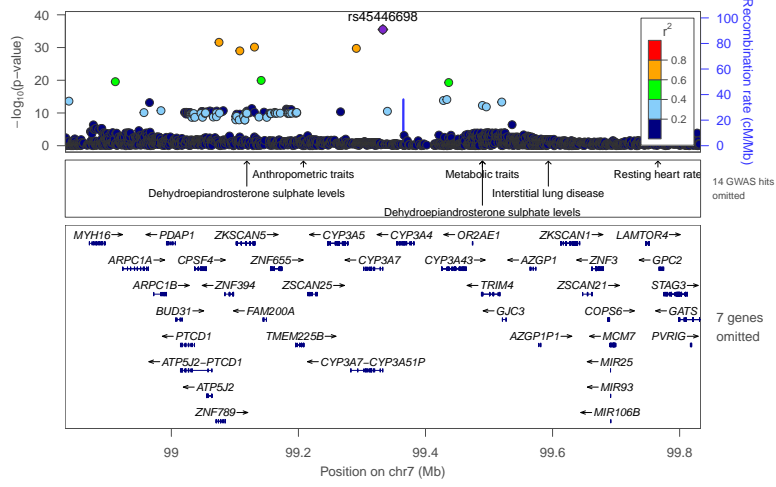

### tauro-beta-muricholate

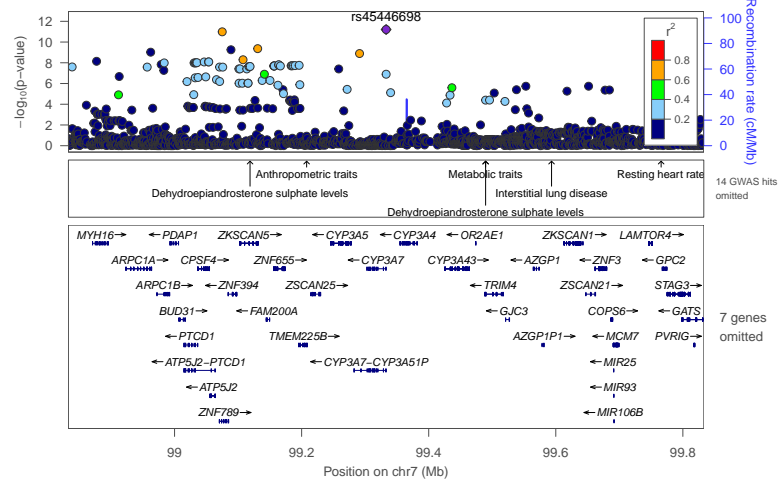

### 16a-hydroxy DHEA 3-sulfate

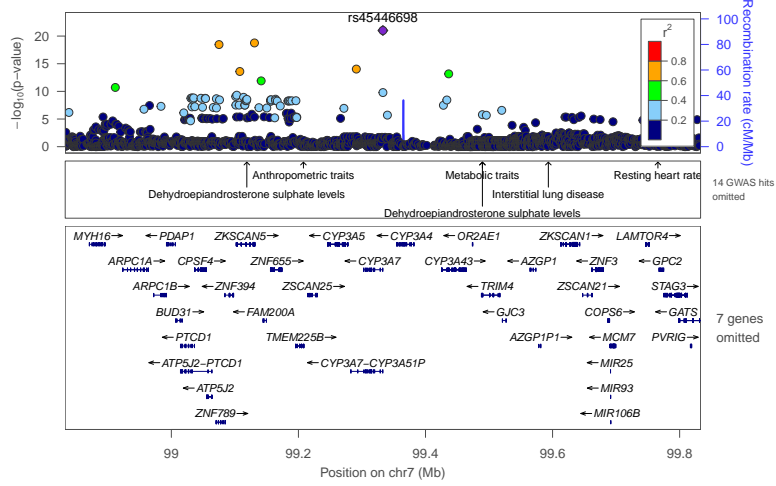

### X - 21410

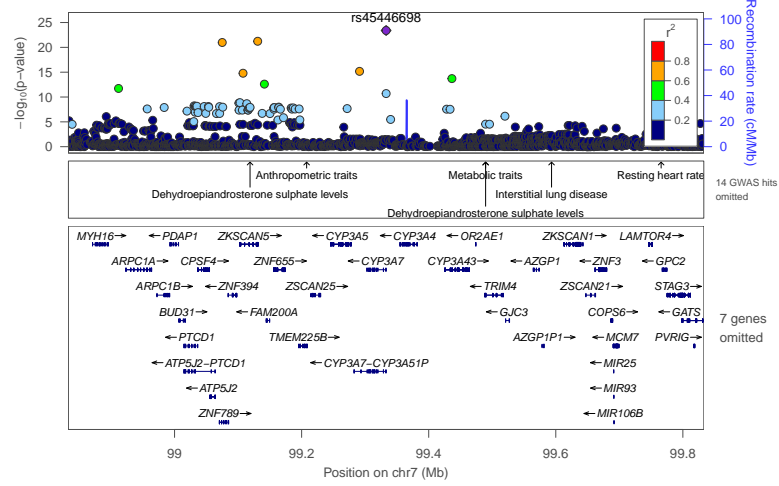

### glyco-beta-muricholate\*\*

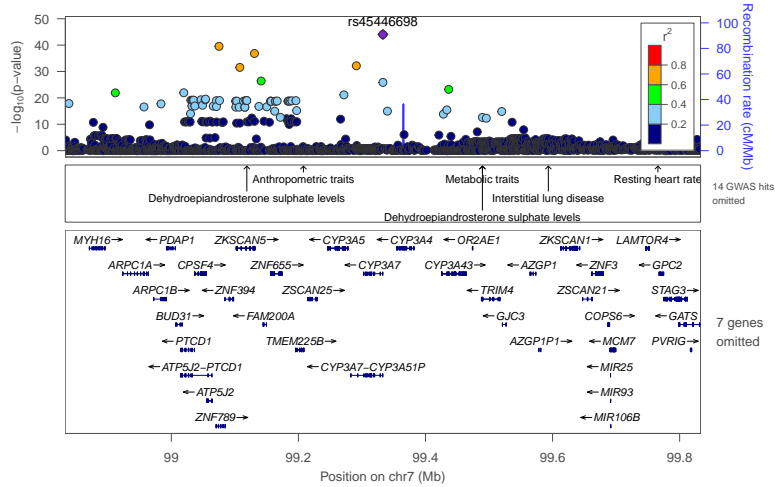

### methionine sulfone

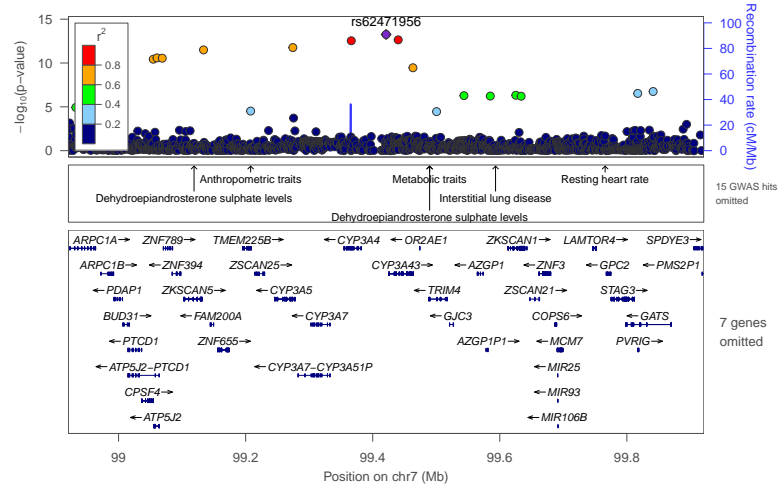

X - 24353

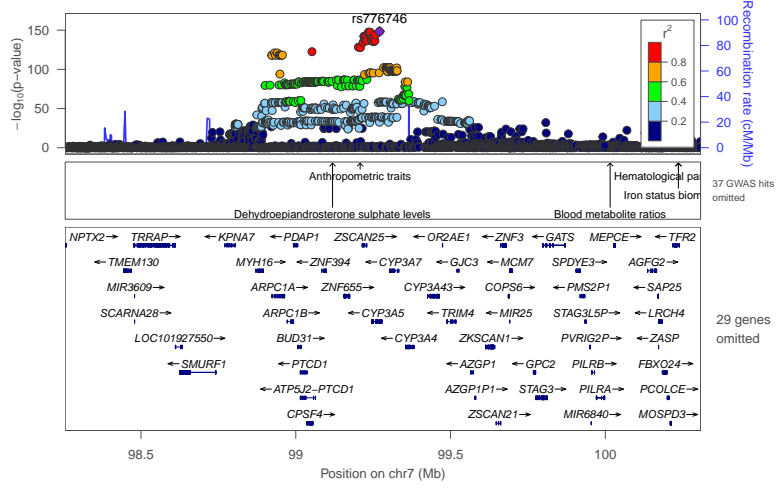

X - 12844

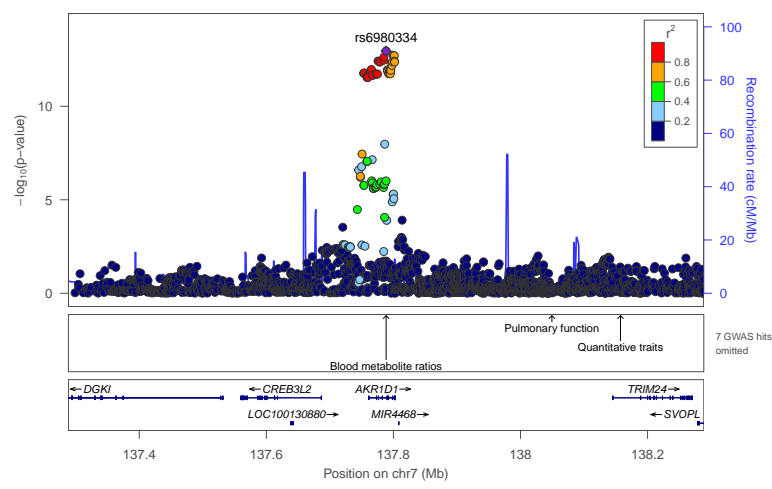

X - 23656

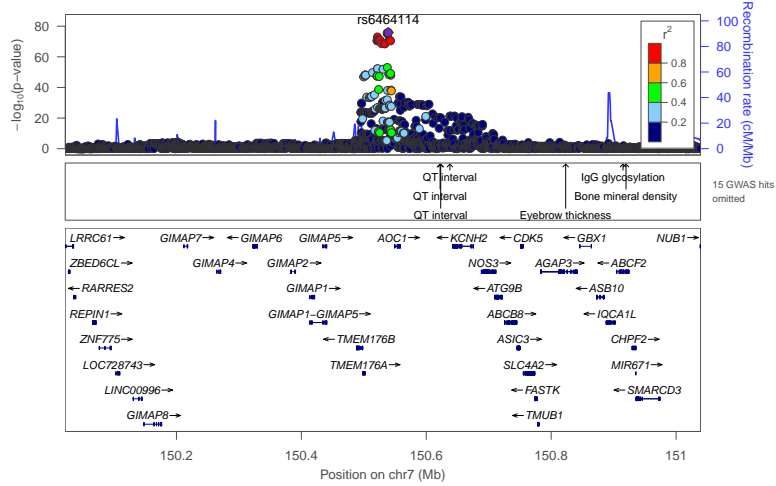

X - 23668

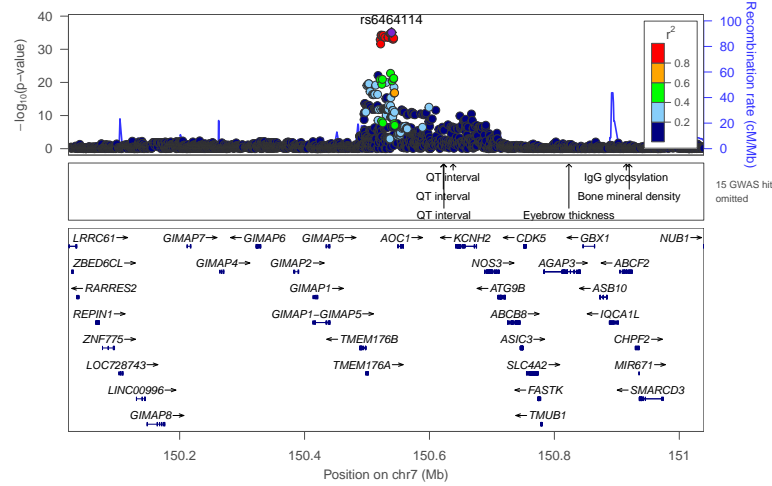

N-acetyl-isoptreanine

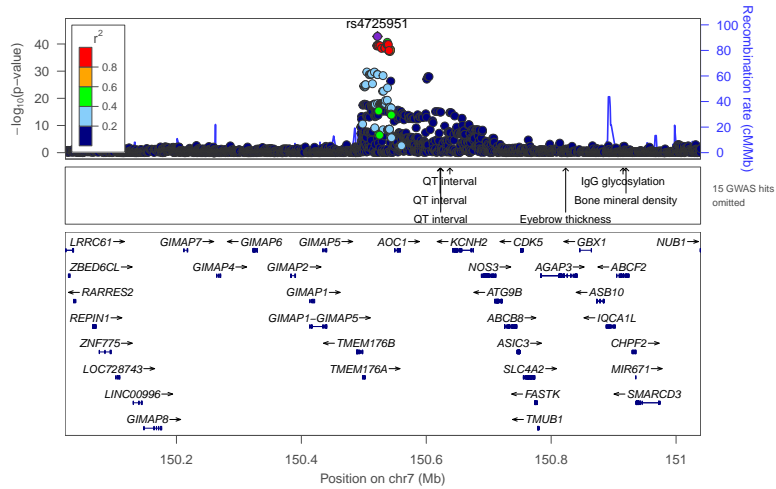

homocarnosine

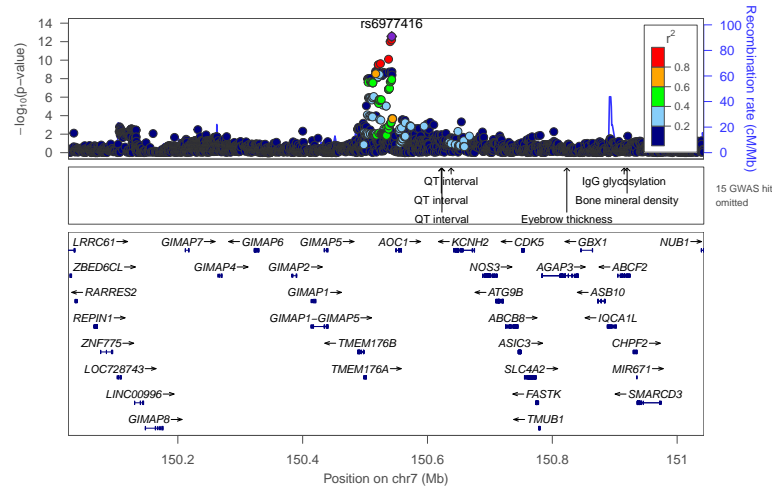

### 1-methylhistamine

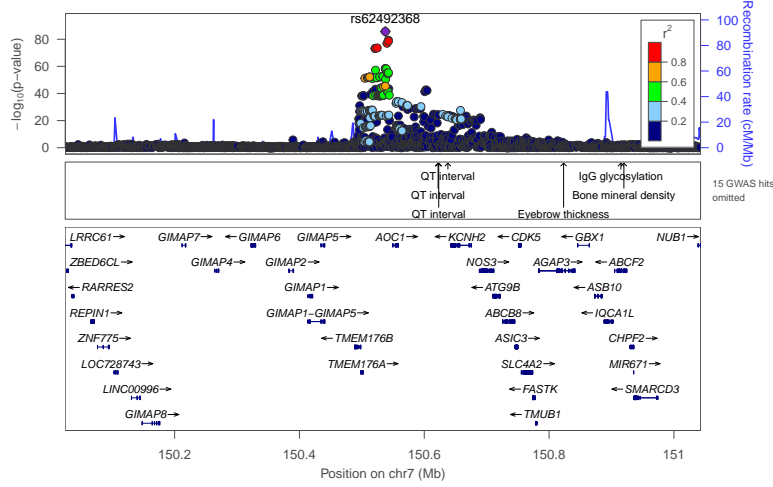

### (N(1) + N(8))-acetylspermidine

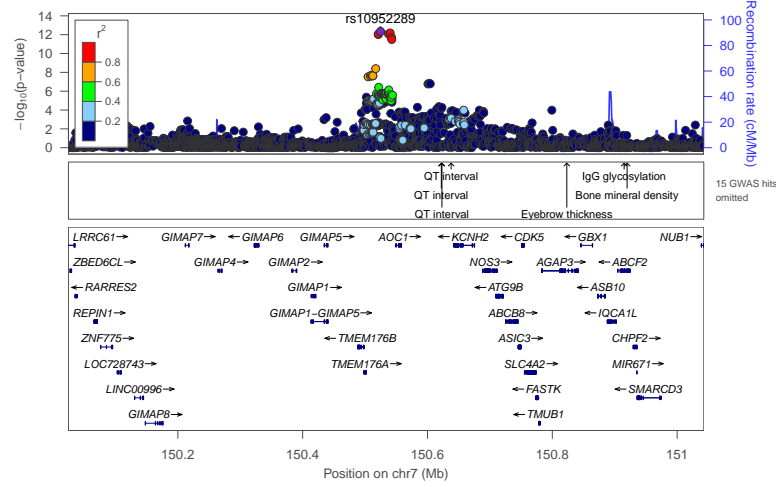

### acisoga

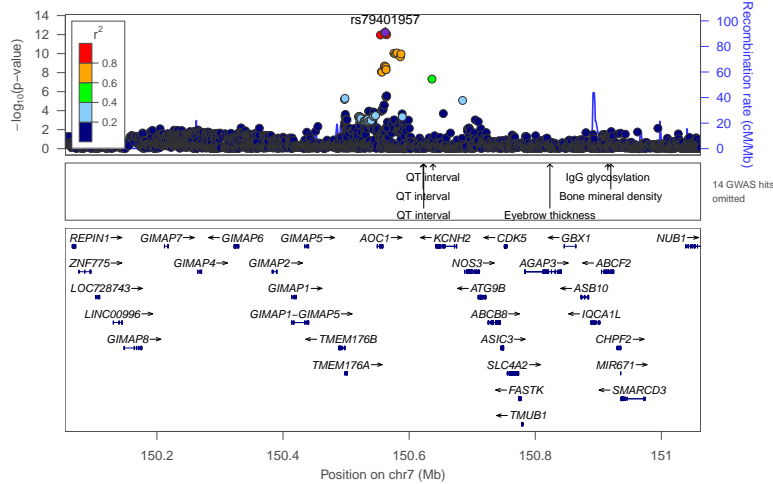

### X - 23659

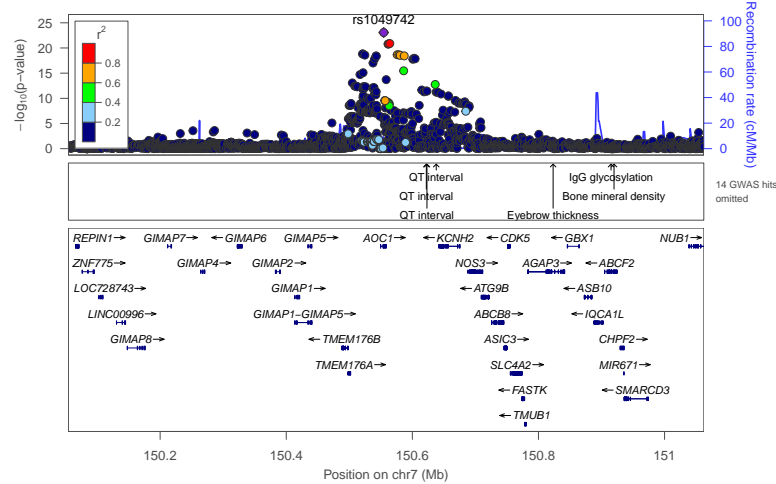

### 4-acetamidobutanoate

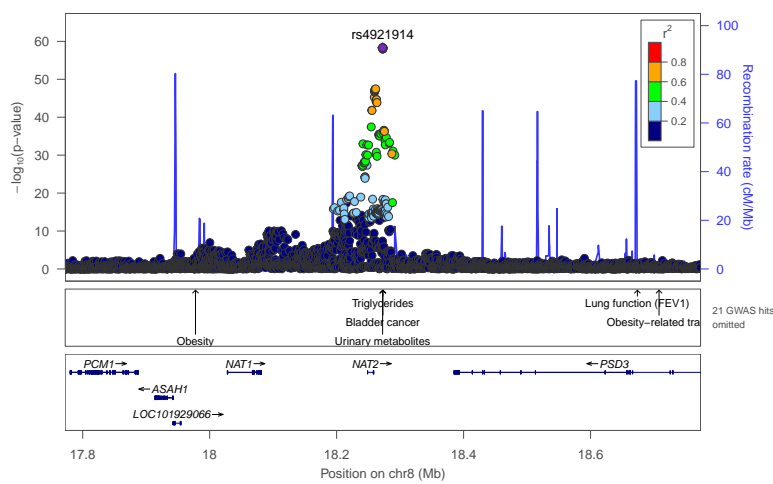

### 1-methylxanthine

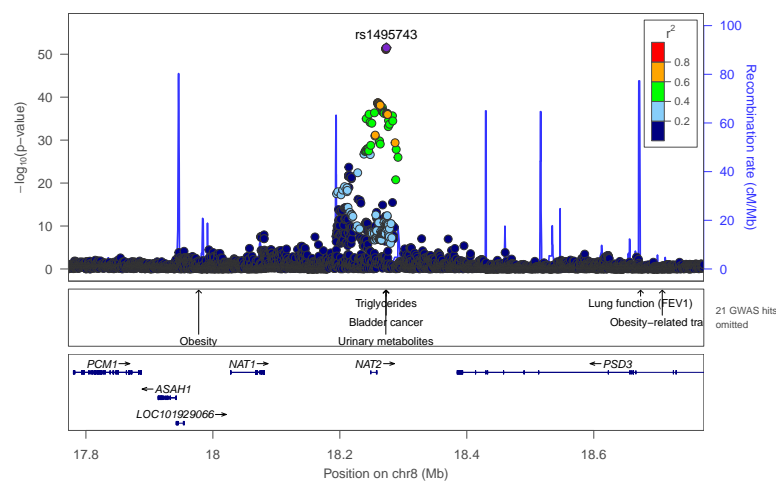

### 1-methylurate

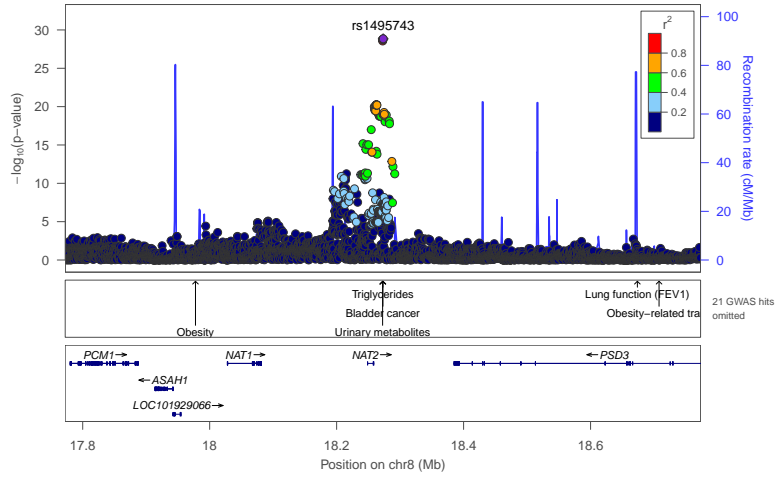

### 5-acetylamino-6-formylamino-3-methyluracil

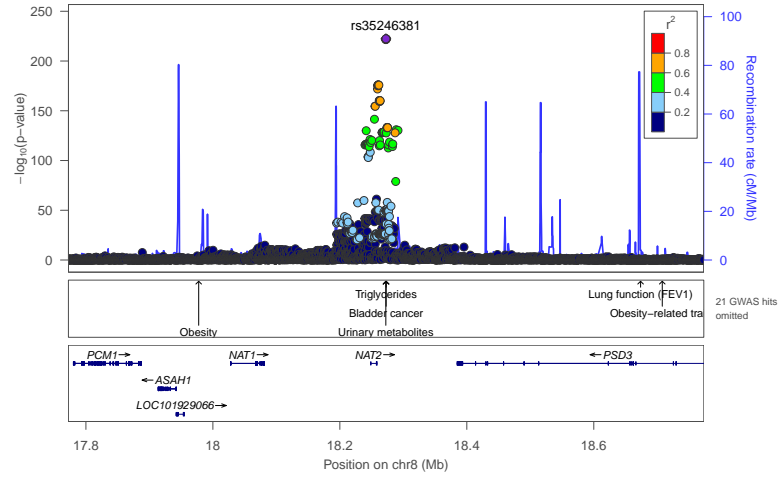

### 5-acetylamino-6-amino-3-methyluracil

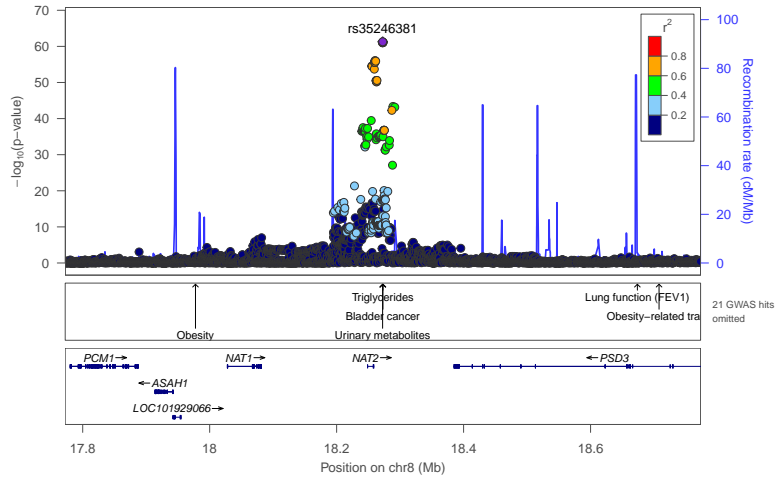

### N-acetylputrescine

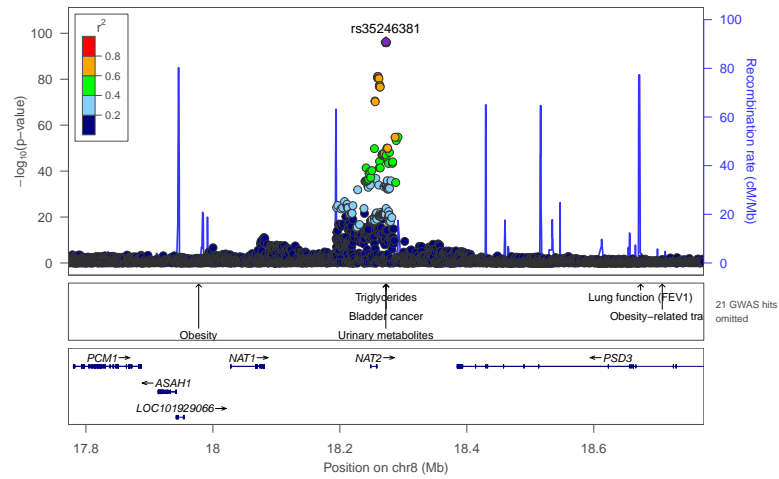

### N-acetyl-cadaverine

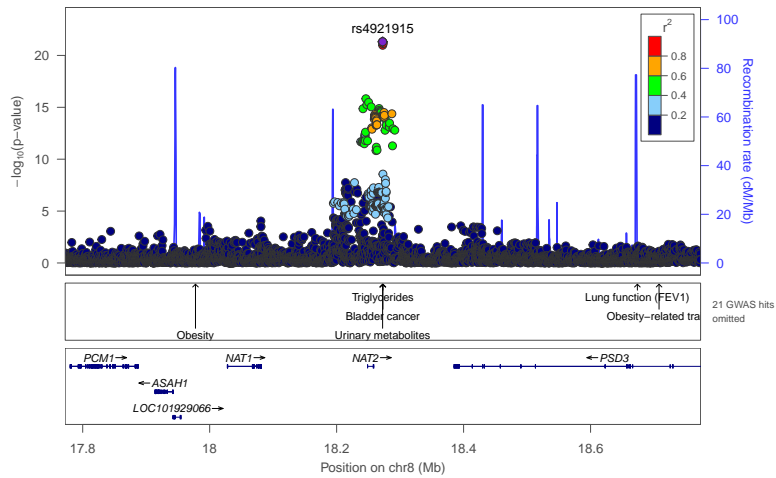

### X - 12410

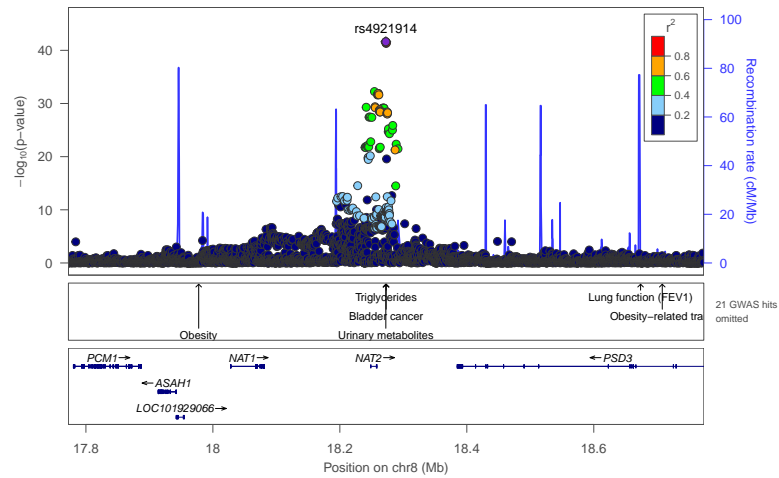



### X - 12193

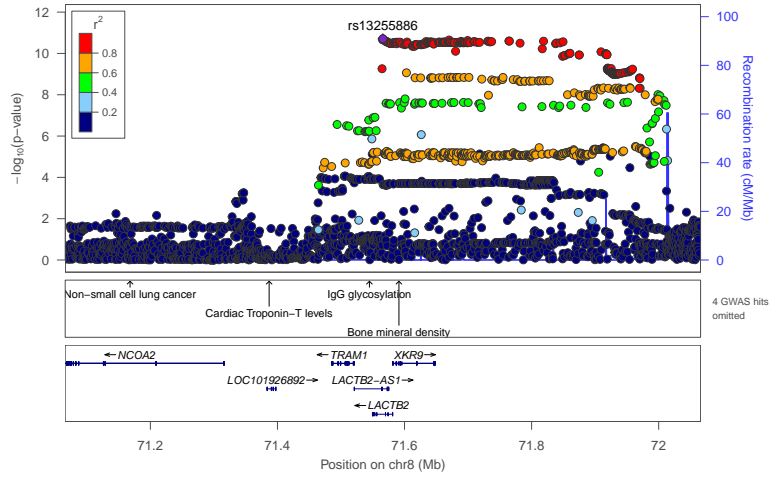

### N1,N12-diacetylspermine

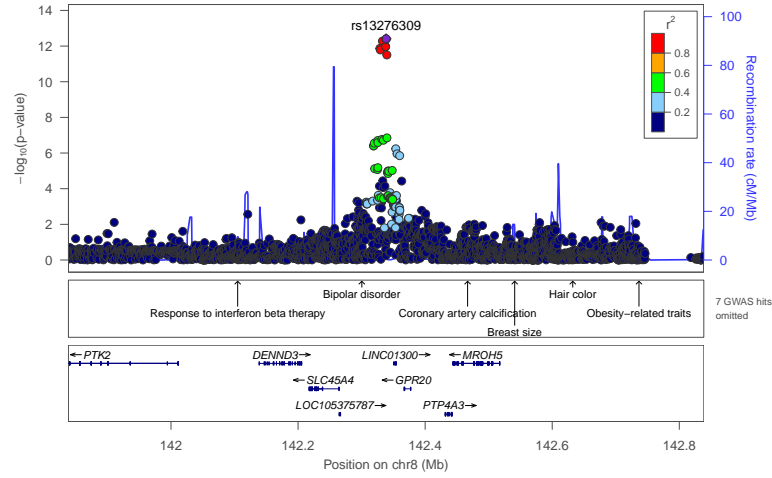

### X - 24418

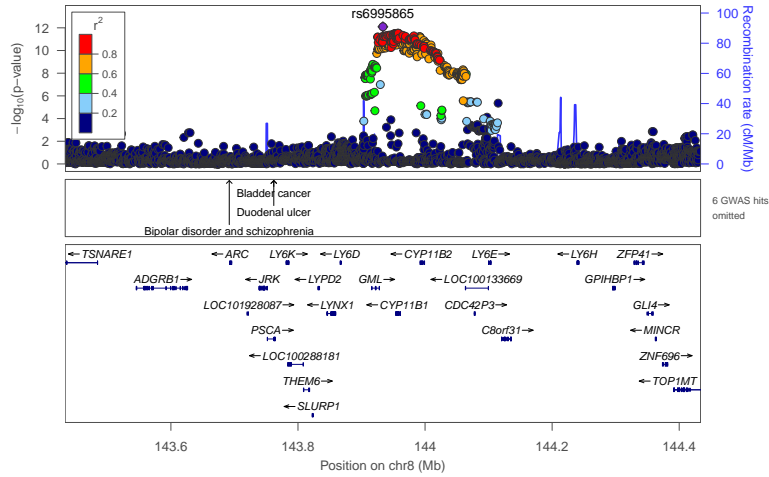

### S-1-pyrroline-5-carboxylate

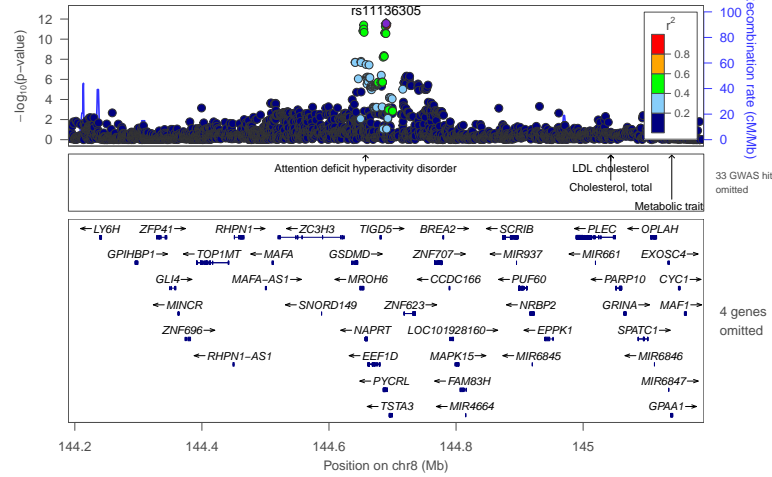

### 6-oxopiperidine-2-carboxylate

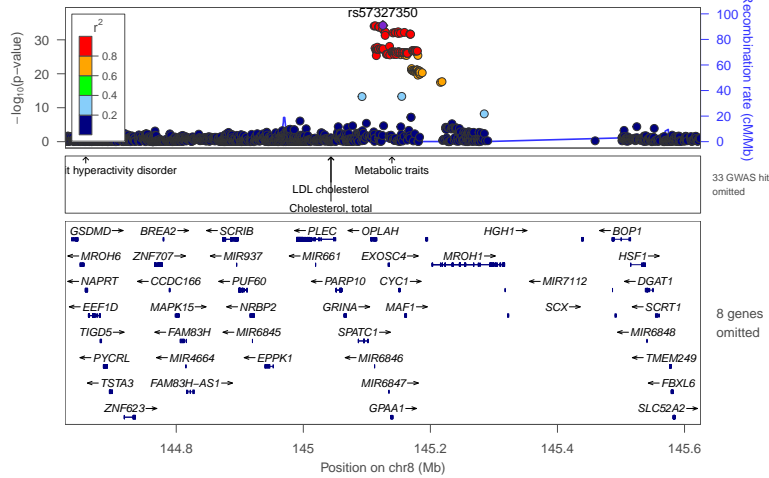

### glycine

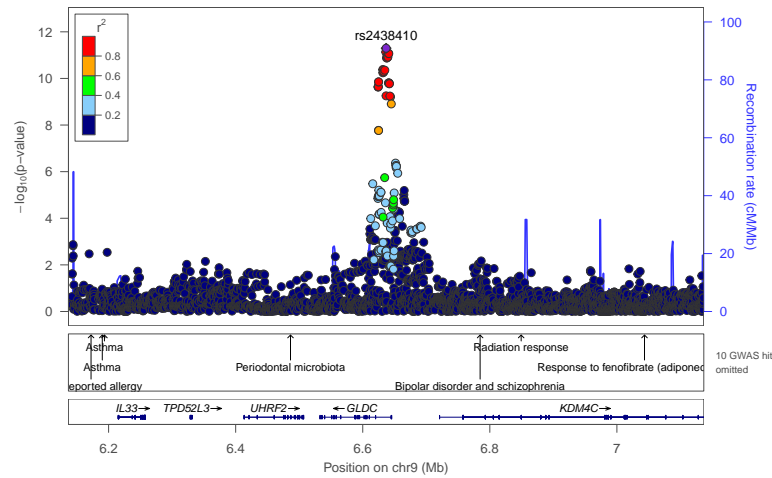

### 3-methylglutaconate

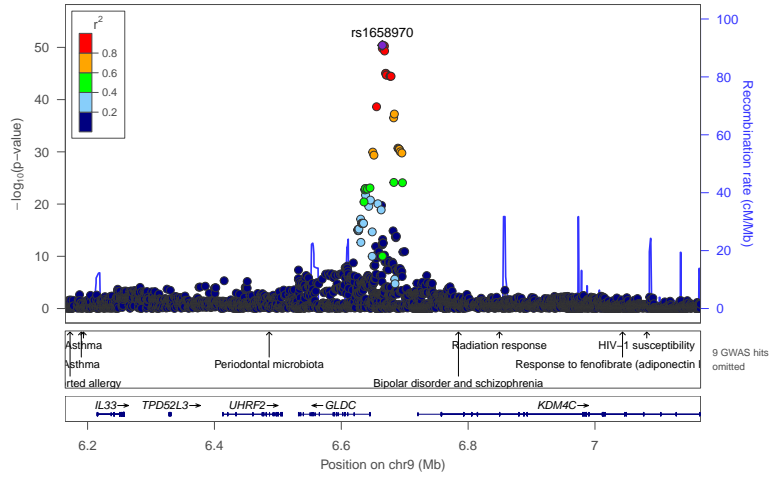

### 3-methylglutaryl carnitine (2)

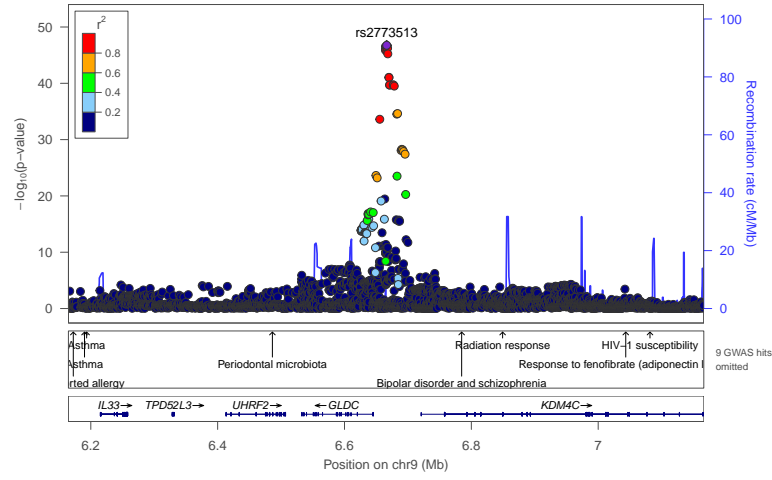

### 3-methylglutarate/2-methylglutarate

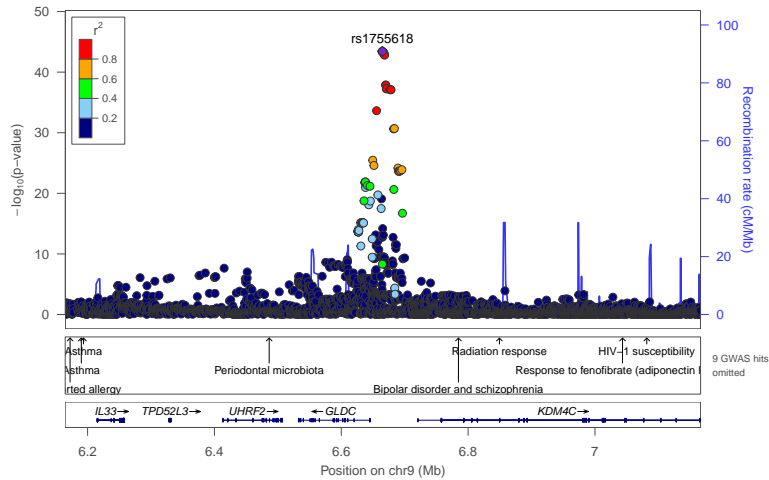

### glycerol

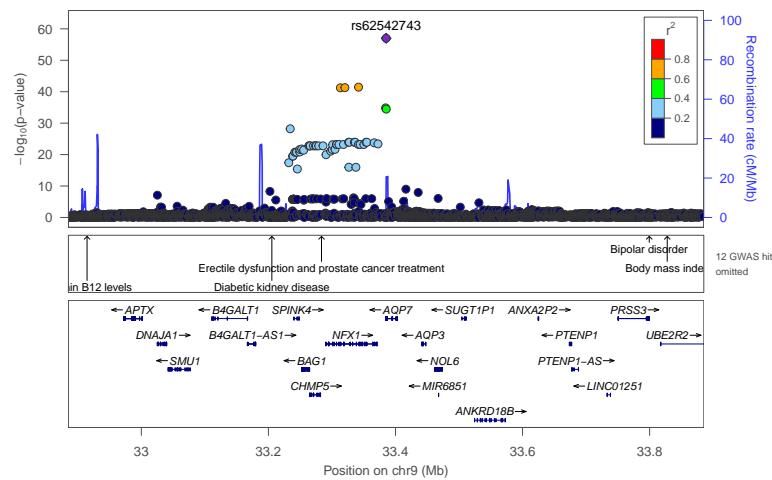

### 2-hydroxyphenylacetate

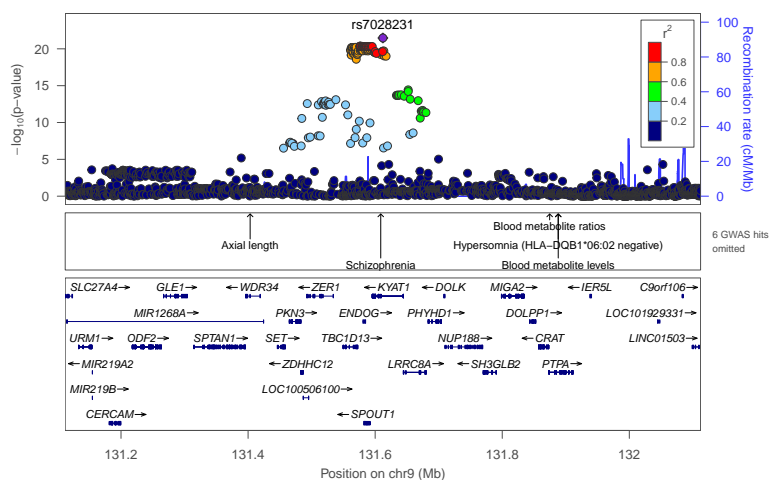

### 4-imidazoleacetate

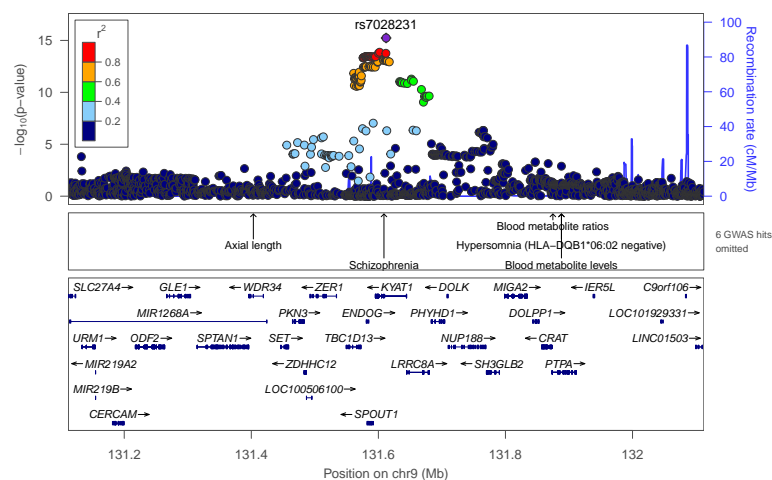

### 2'-O-methylcytidine

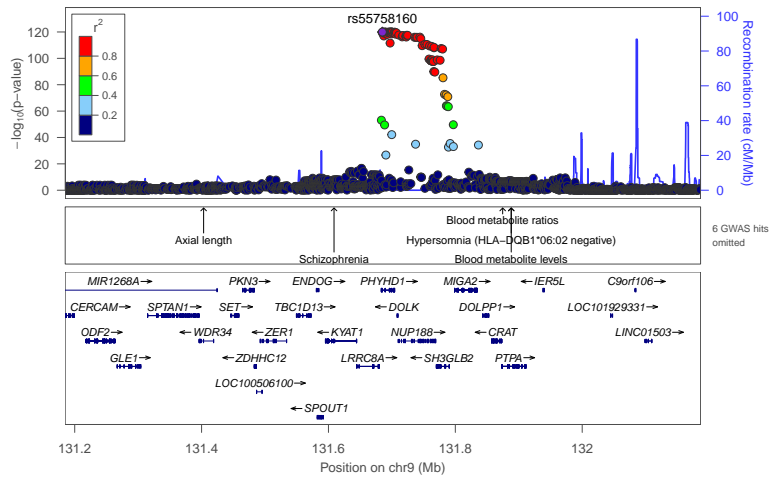

### 2'-O-methyluridine

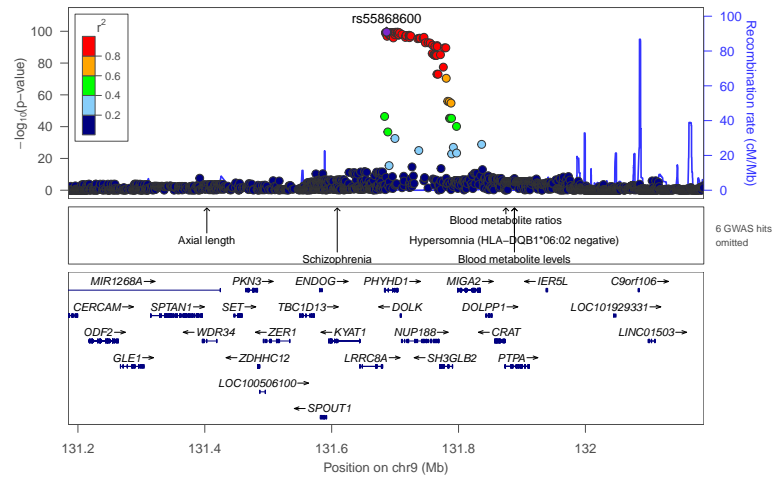

### 2-methylmalonylcarnitine (C4-DC)

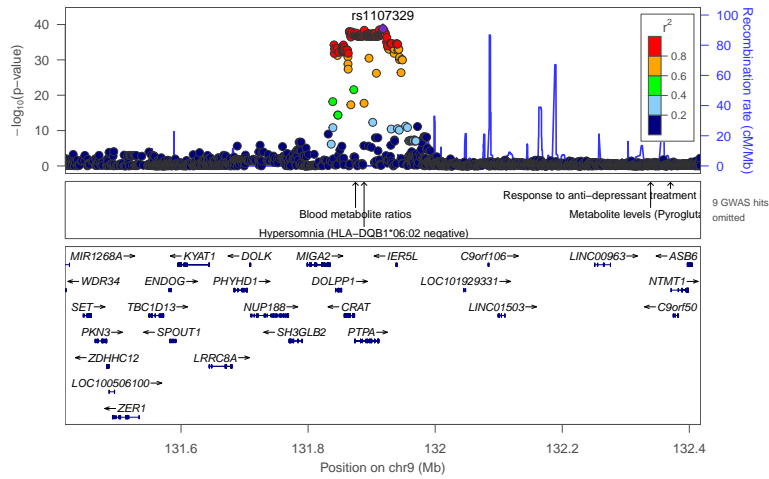

### X - 24834

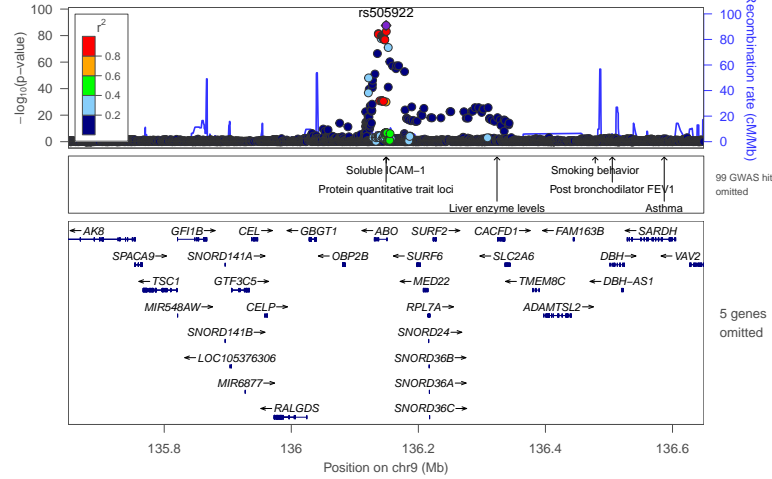

### levulinic acid (4-oxovaleric acid)

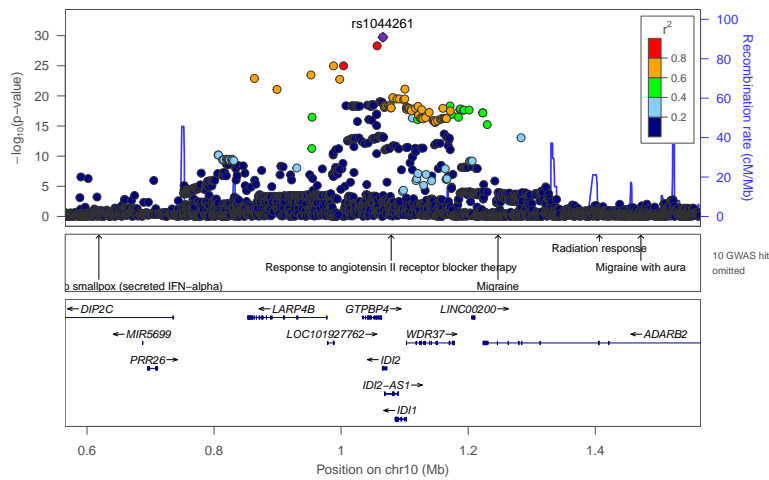

### cortisol glucuronide (2)

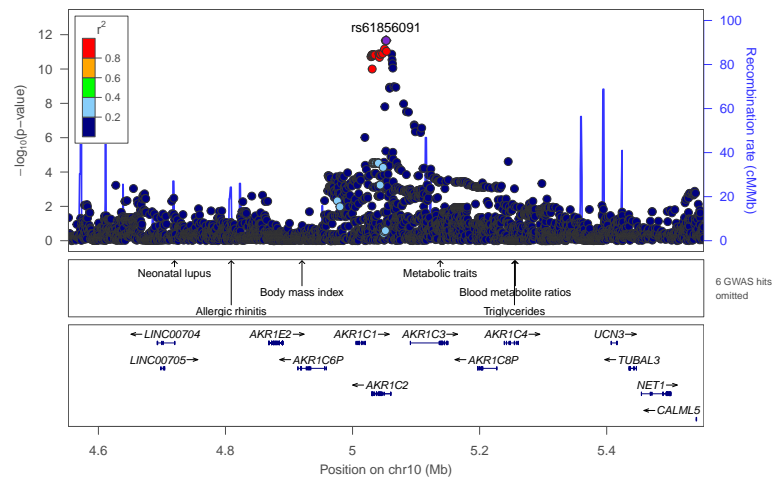

X - 17339

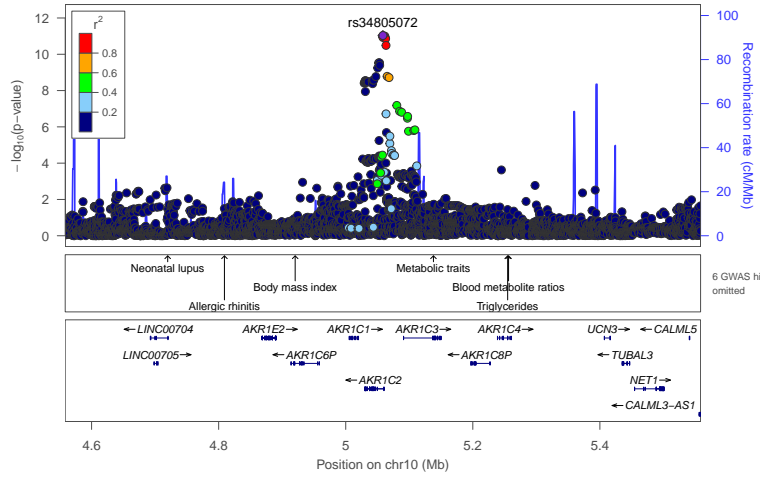

X - 12112

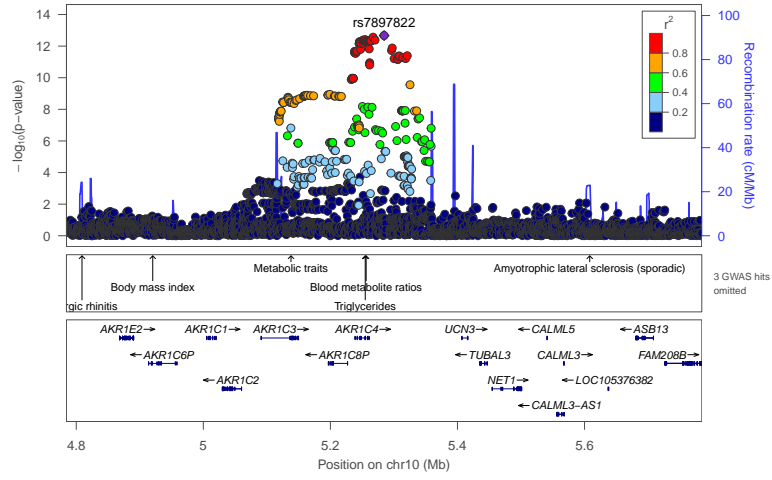

4-ureidobutyrate

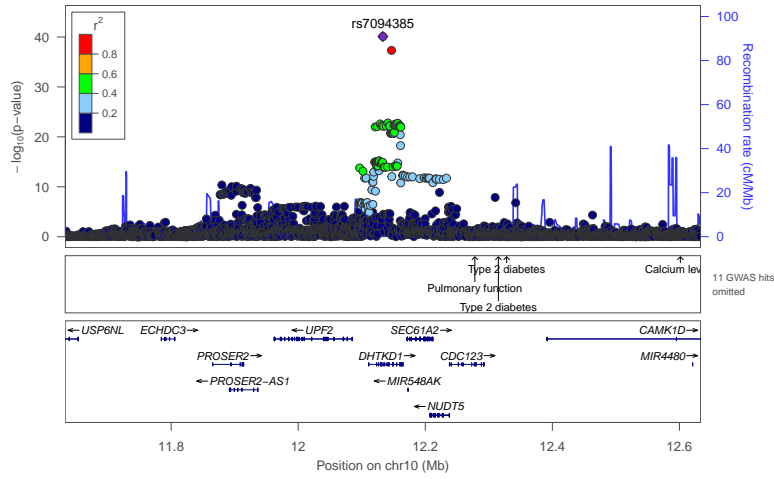

N-acetyl-beta-alanine

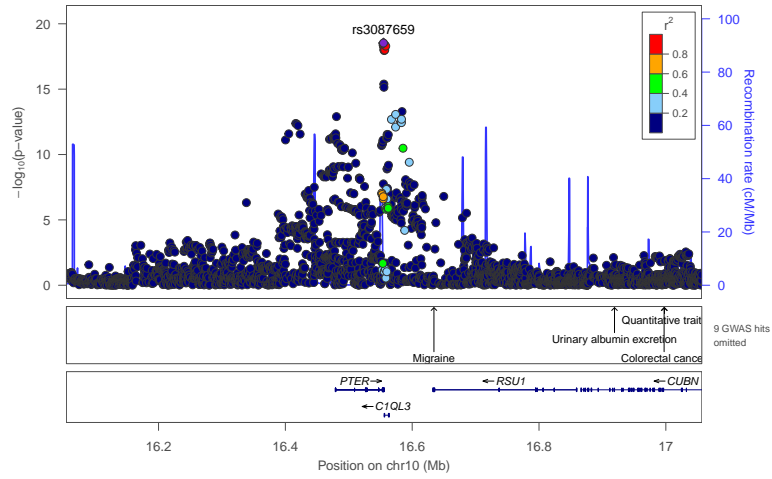

N-acetyltaurine

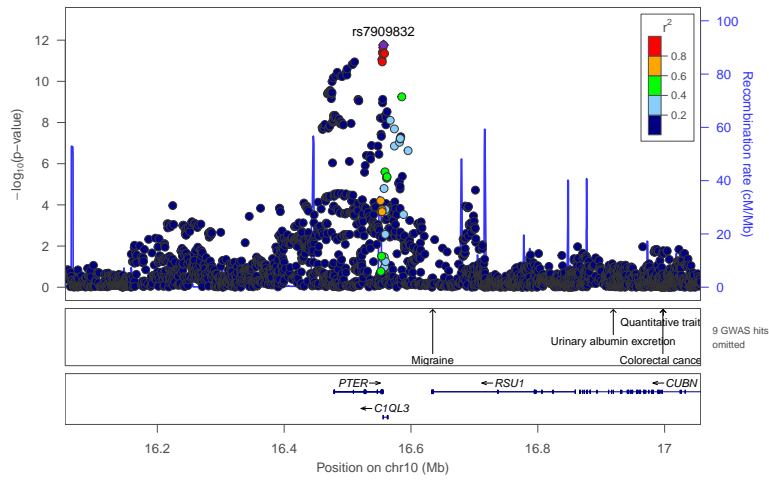

X - 23672

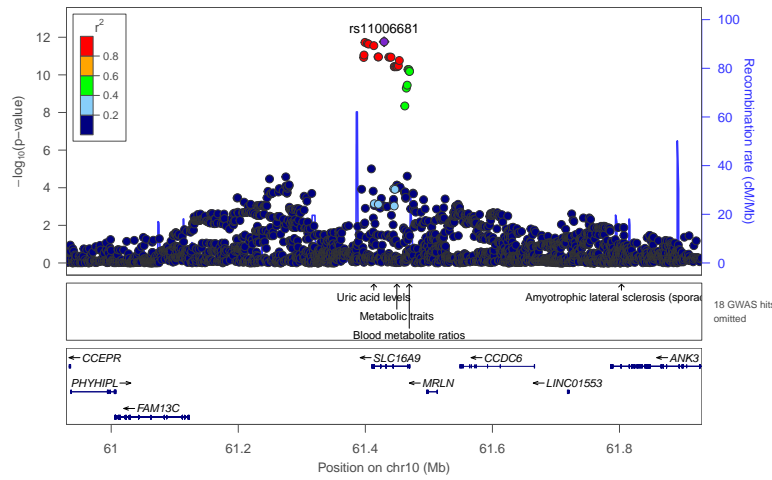

### betaine

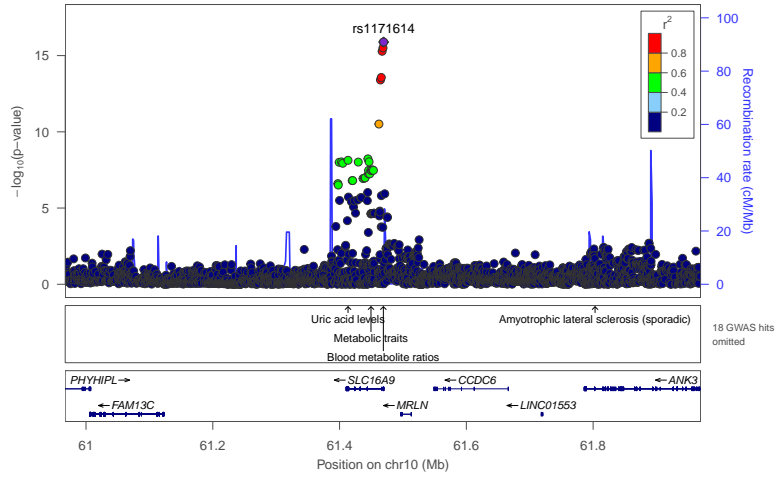

### X - 17324

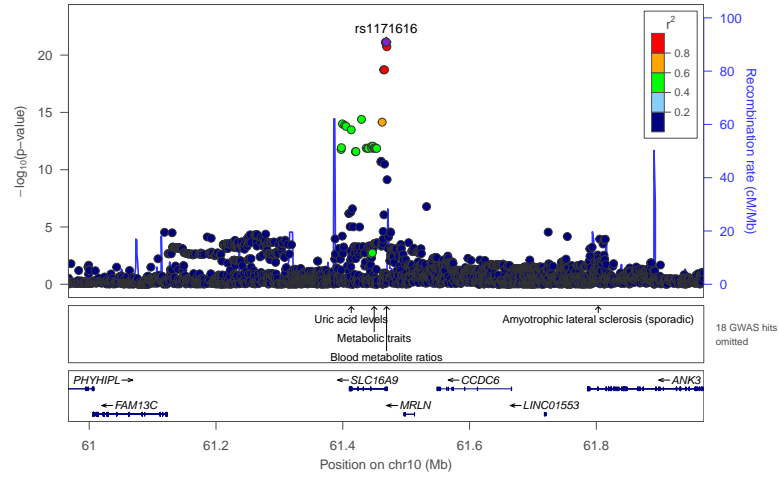

### undecenoylcarnitine (C11:1)

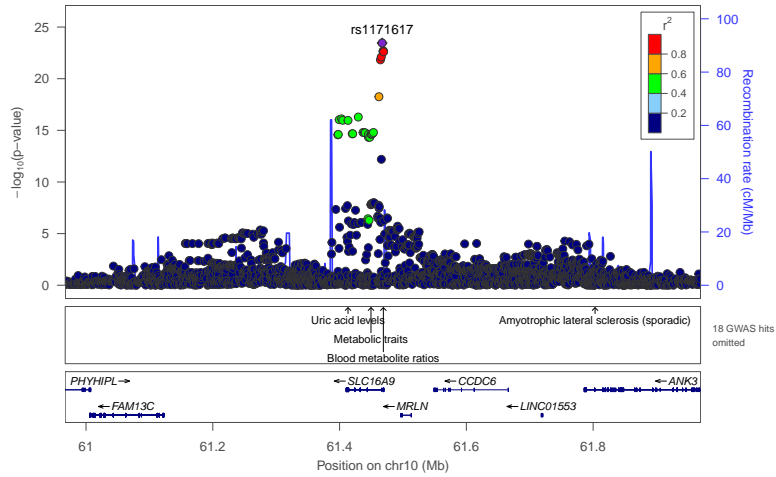

### 3-hydroxyphenylacetyl carnitine

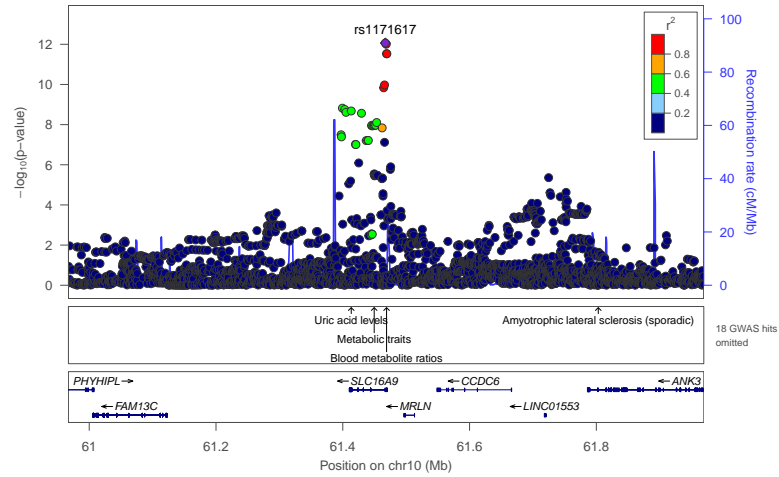

### indoleacetyl carnitine\*

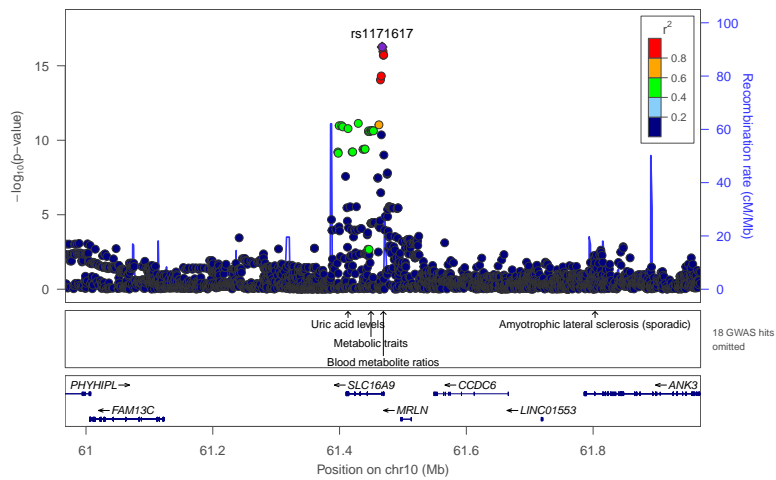

### phenylalanylglycine

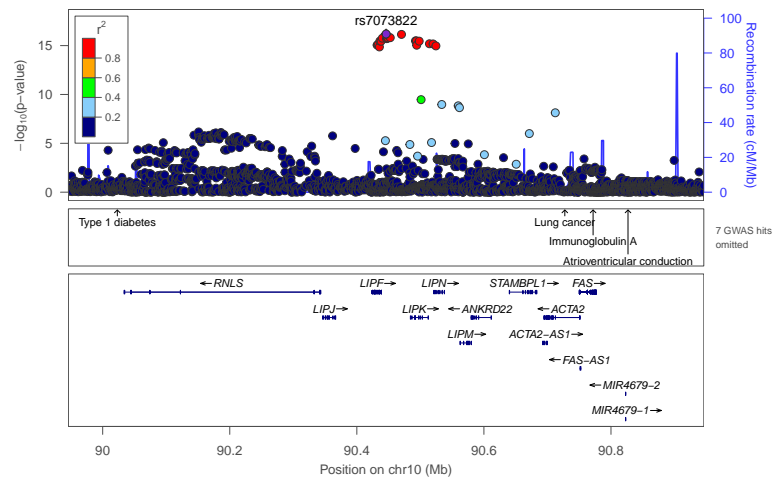



glucuronide of C14H22O4 (3)\*

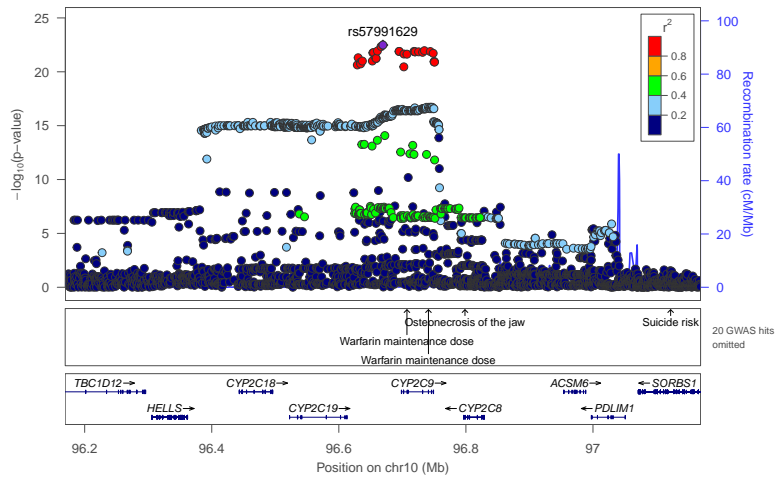

X - 21258

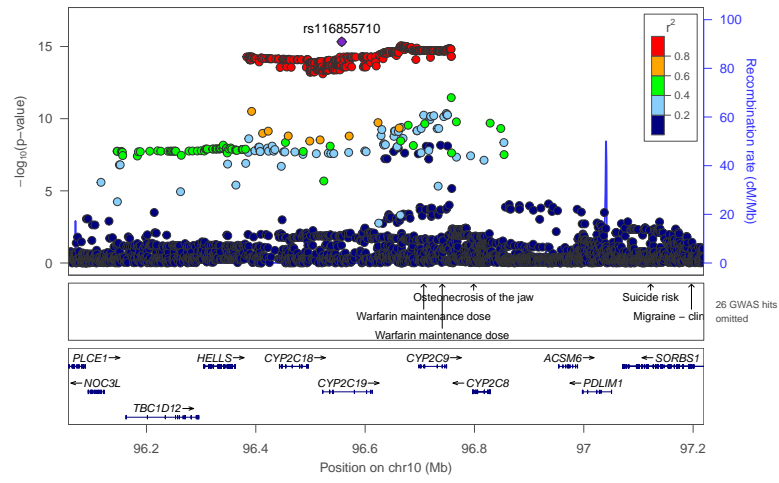

X - 17324

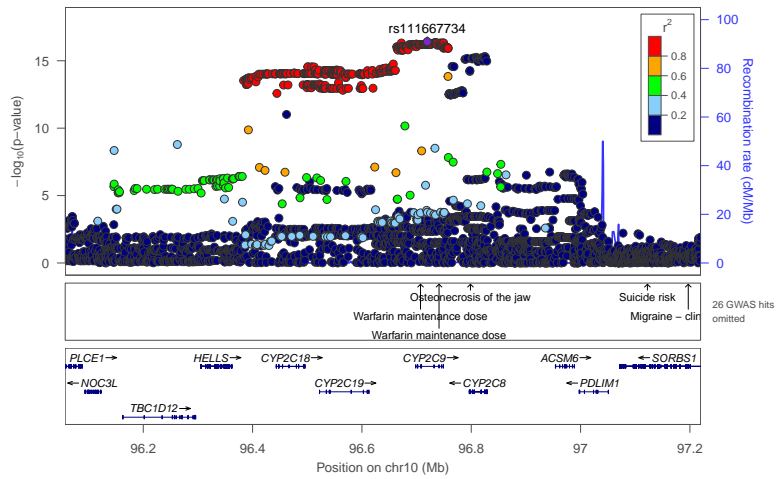

X - 24354

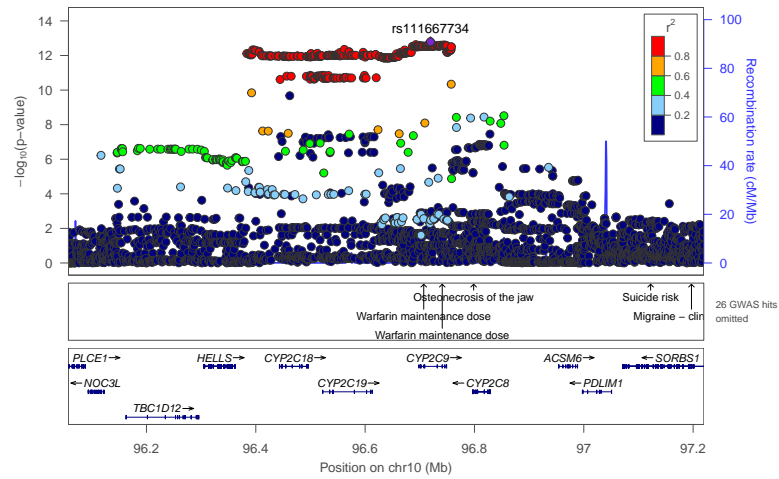

glycine conjugate of C10H14O2 (1)\*

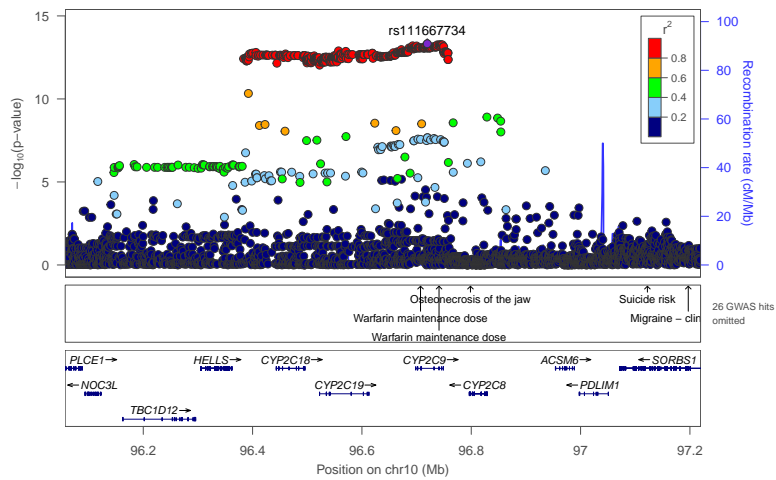

X - 16087

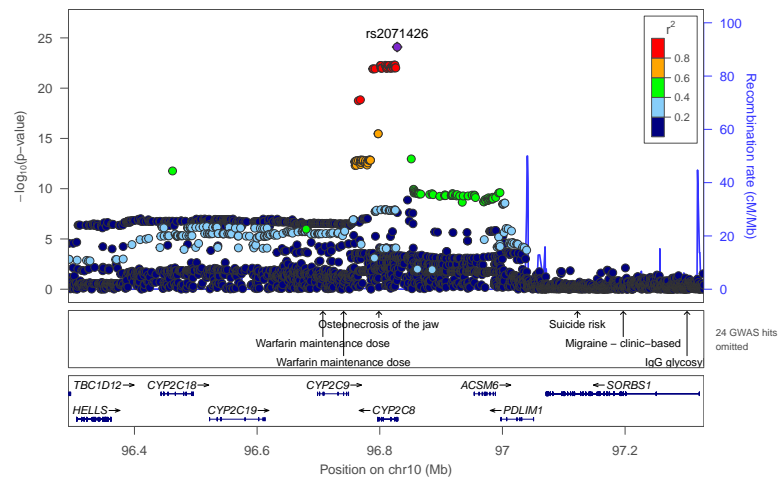



X - 24346

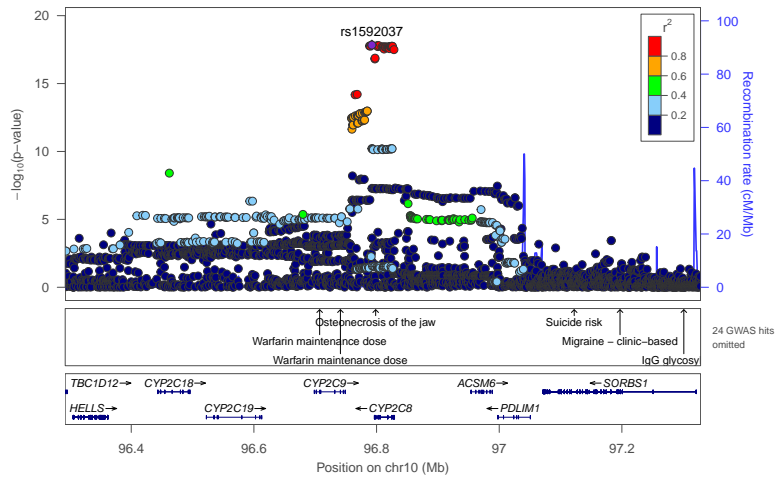

X - 24556

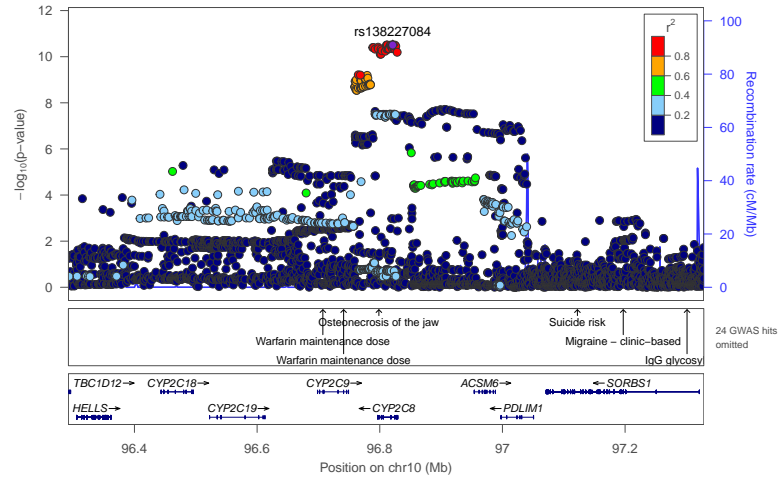

glucuronide of C14H22O4 (2)\*

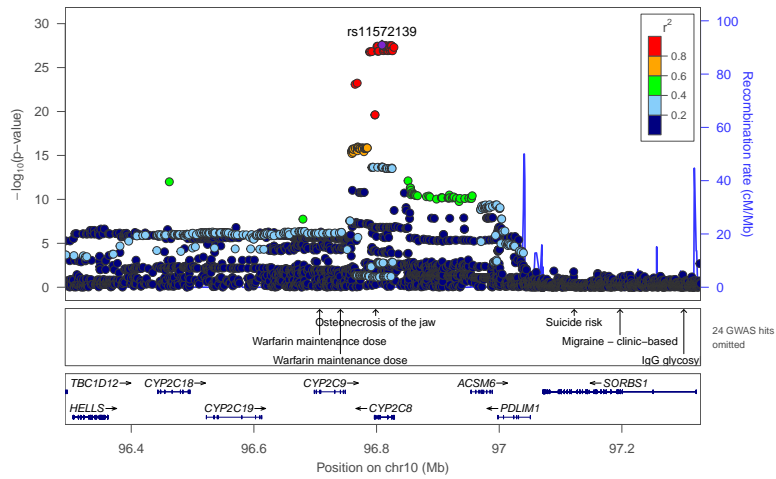

dimethylmalonic acid

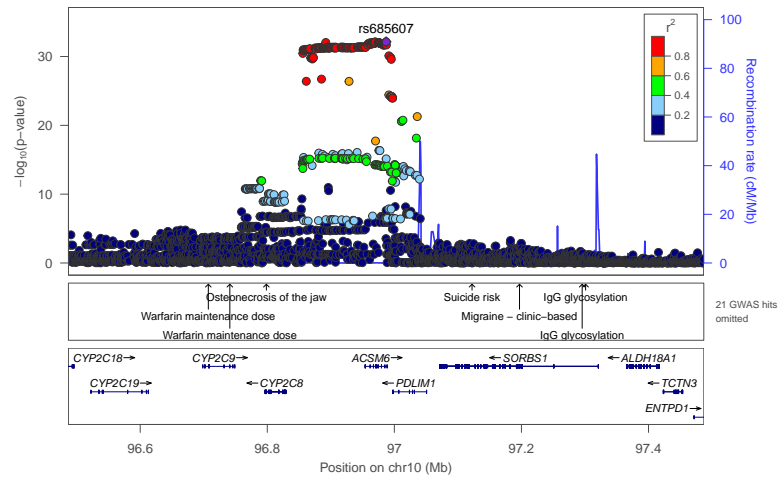

3-methylcytidine

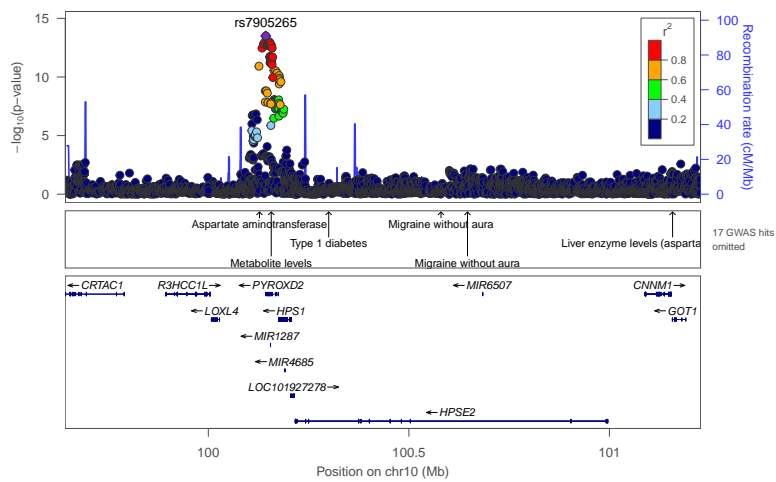

N2,N2-dimethylguanosine

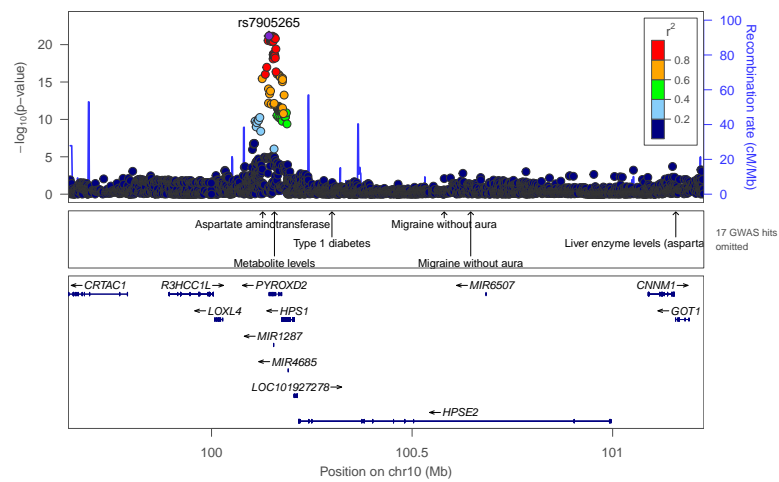

### N-methylpipecolate

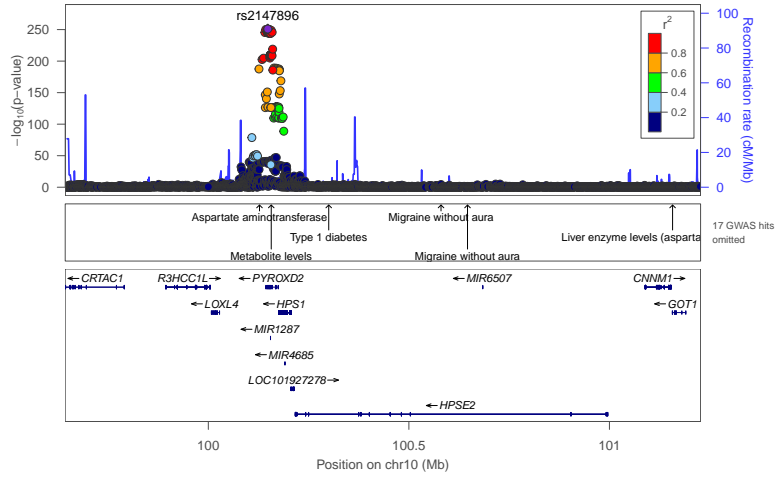

### X - 22162

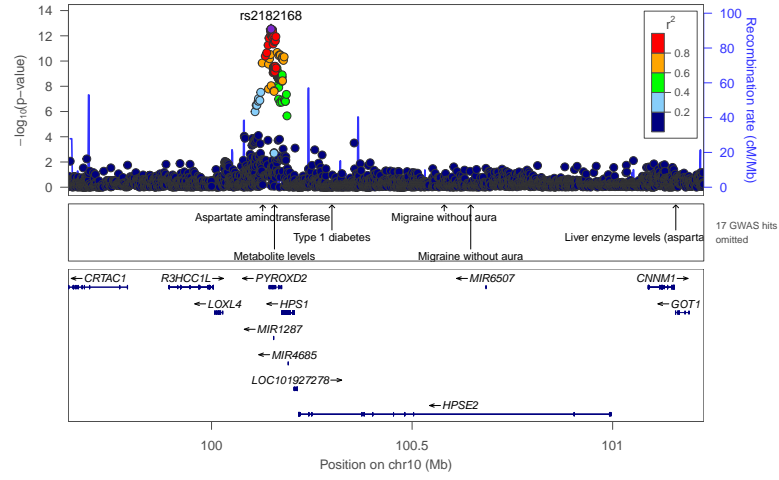

### X - 12112

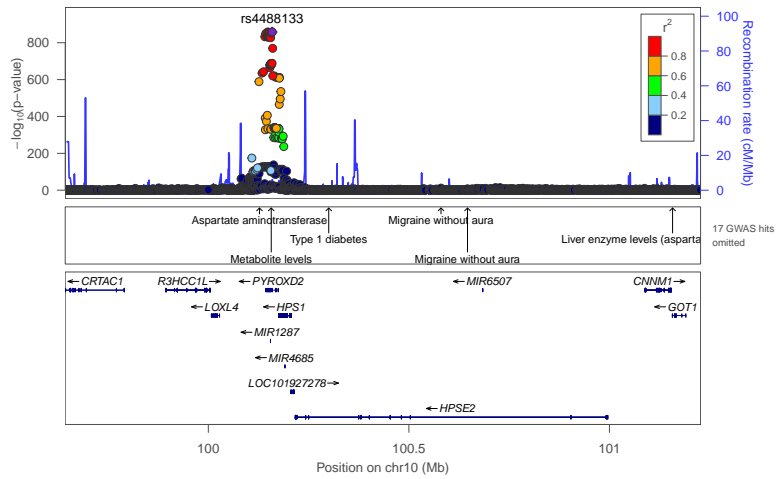

### N2-acetyl,N6,N6-dimethyllysine

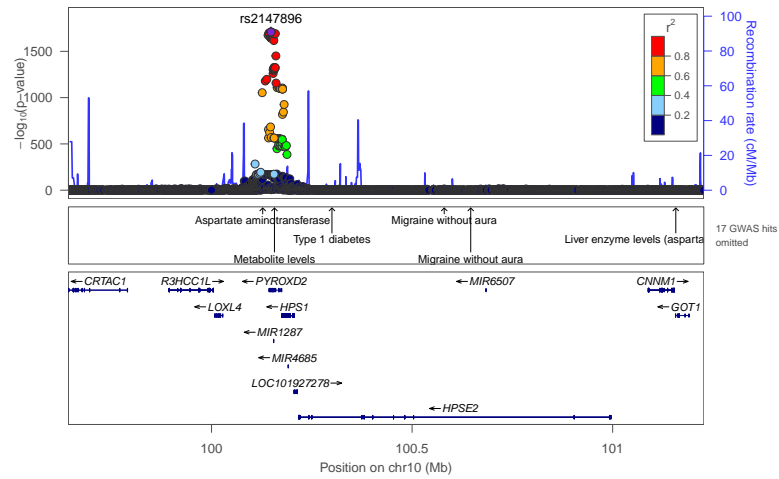

### N,N-dimethyl-5-aminovaleate

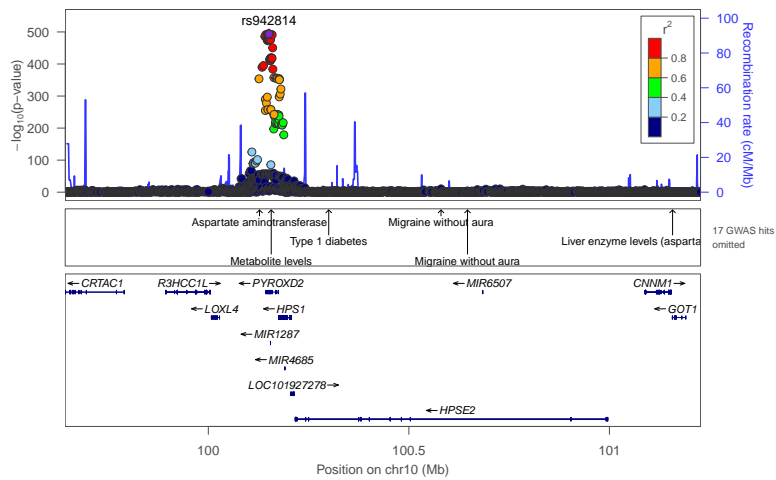

### N6-methyllysine

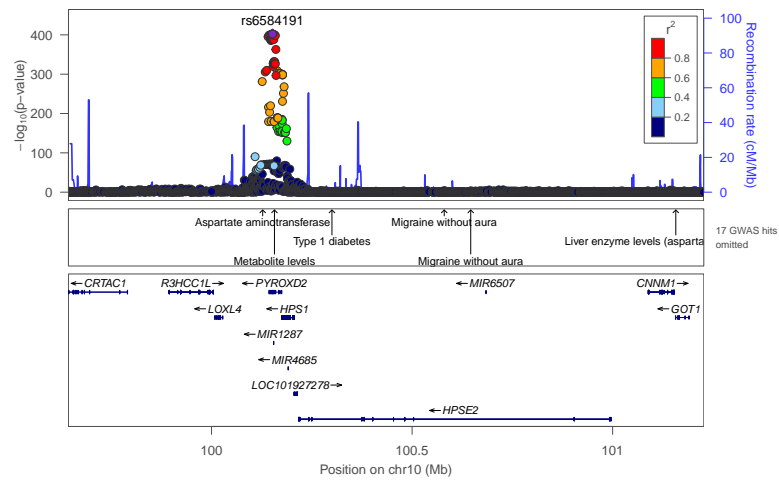

### N6,N6-dimethyllysine

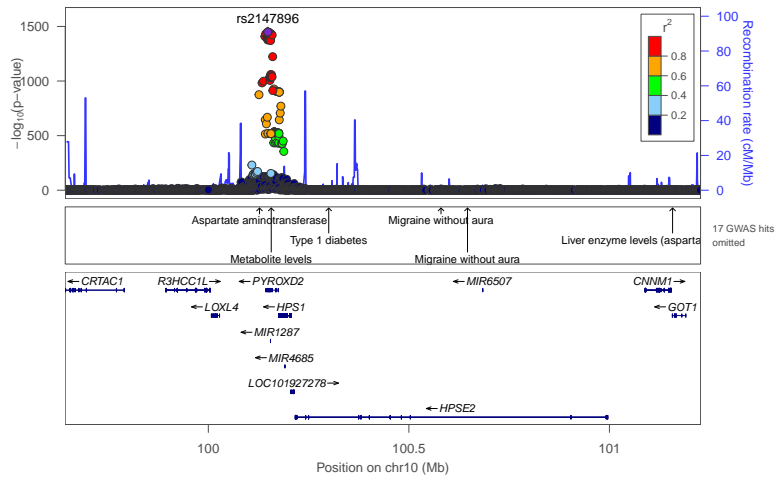

### N2-acetyl,N6-methyllysine

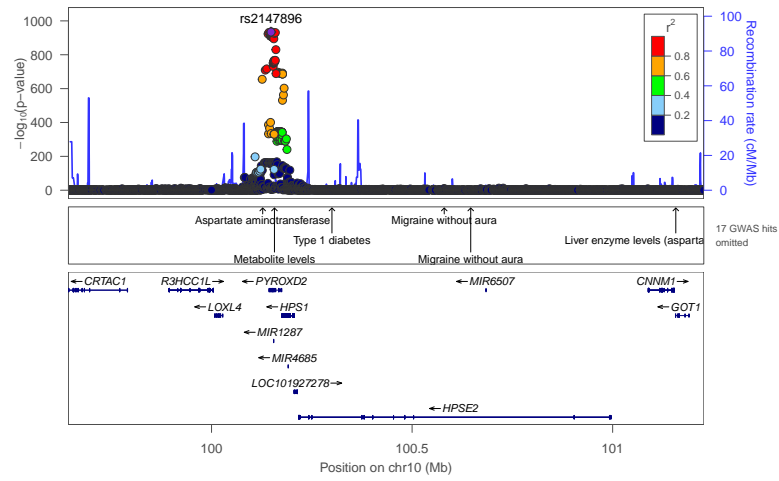

### glycocholate sulfate\*

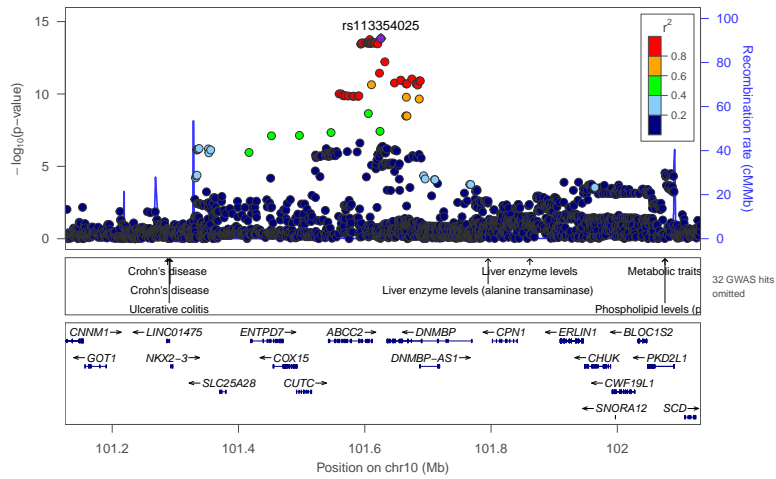

### X - 21467

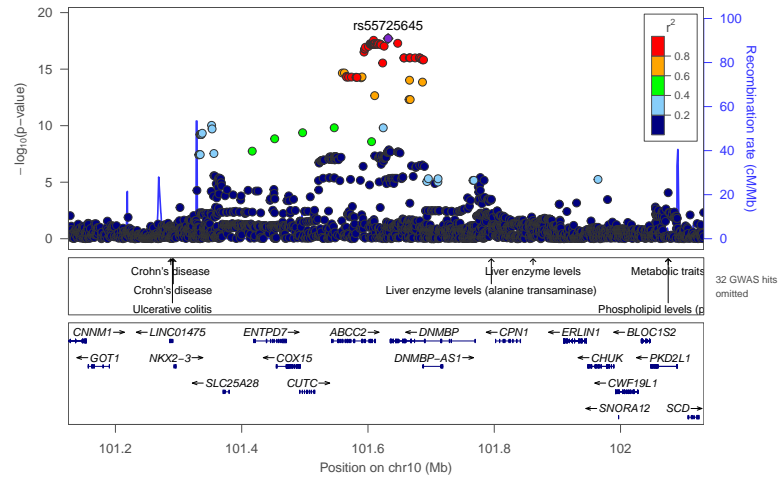

### glucuronide of C16H30O4 (1)\*

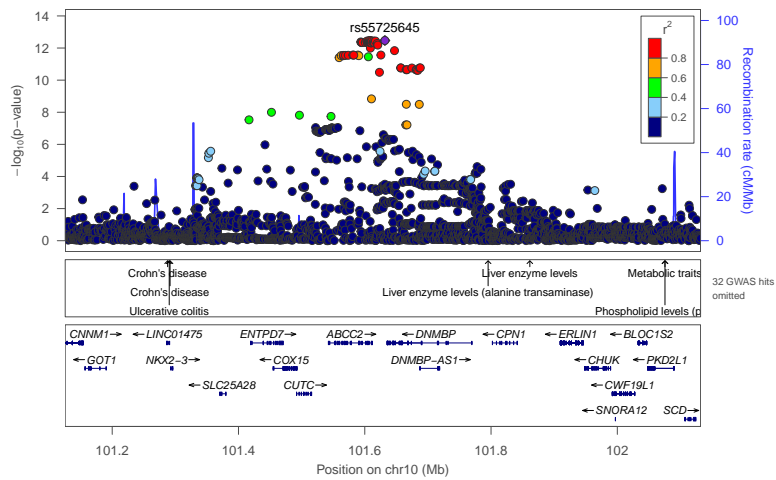

### X - 24583

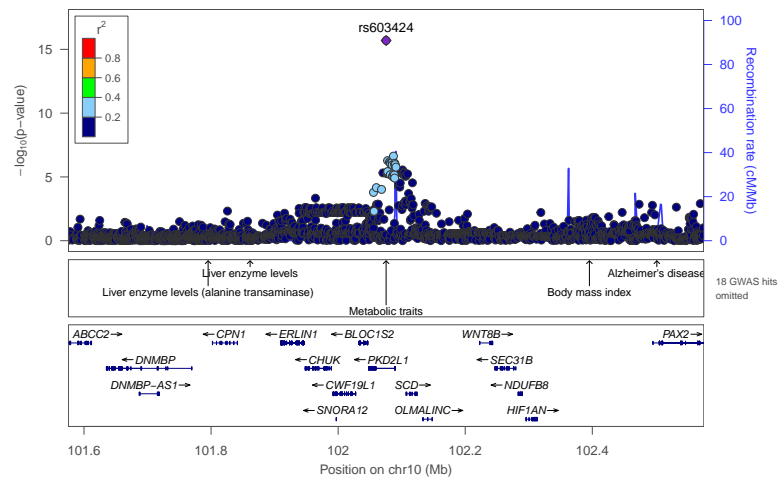

### galactosylglycerol

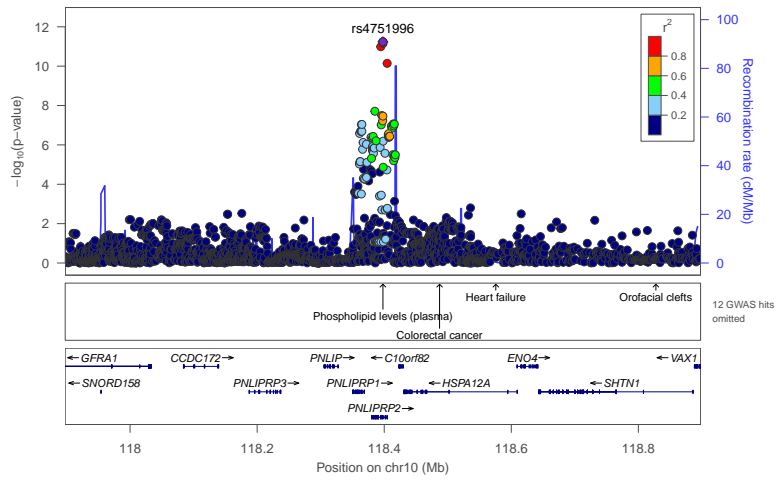

### (N(1) + N(8))-acetylspermidine

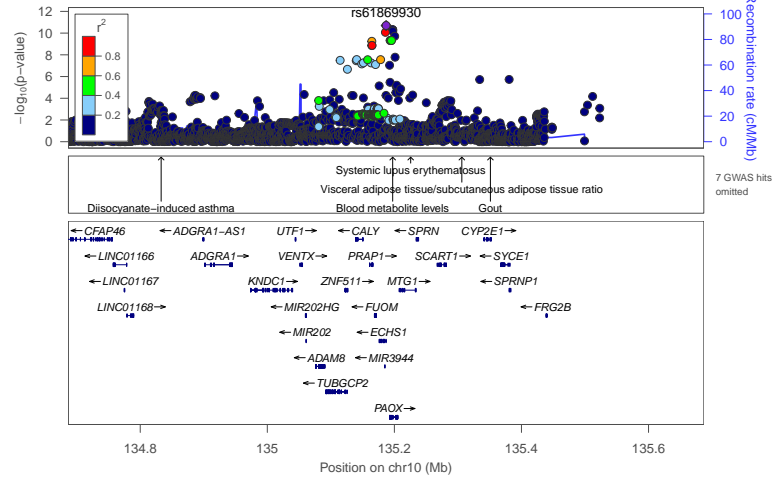

### acisoga

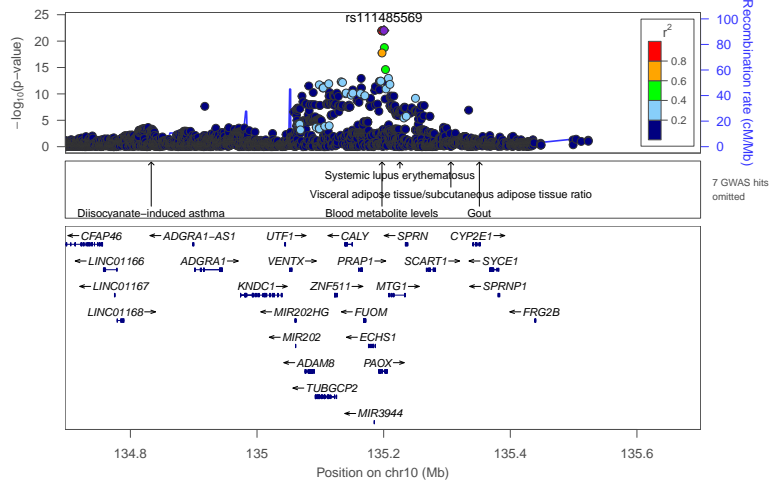

### X - 23656

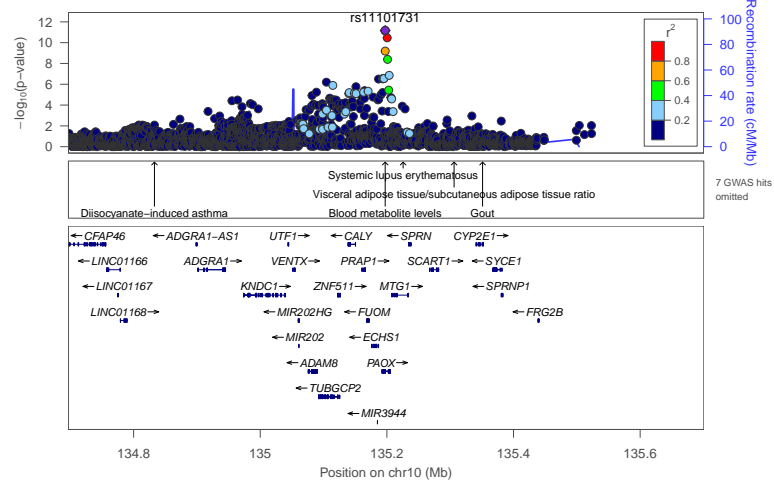

### N1,N12-diacetylspermidine

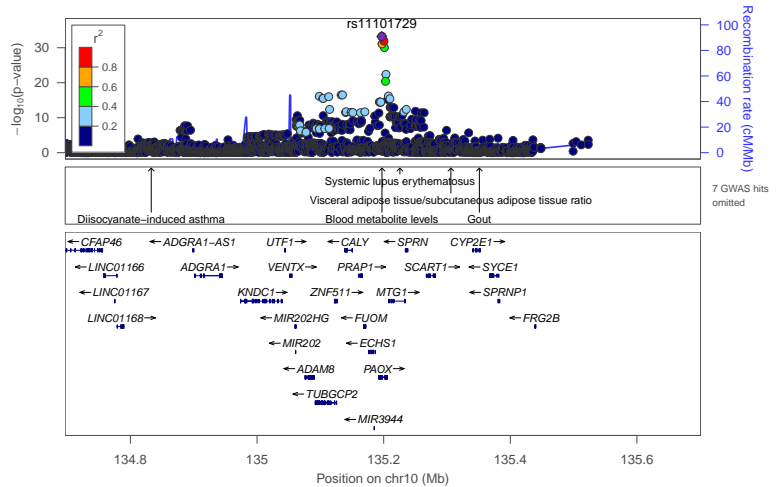

### diacetylspermidine\*

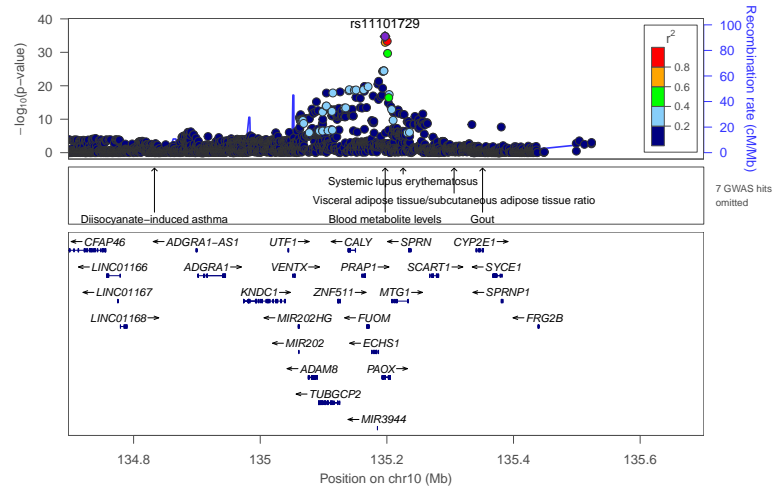

### N-acetyl-isoptreanine

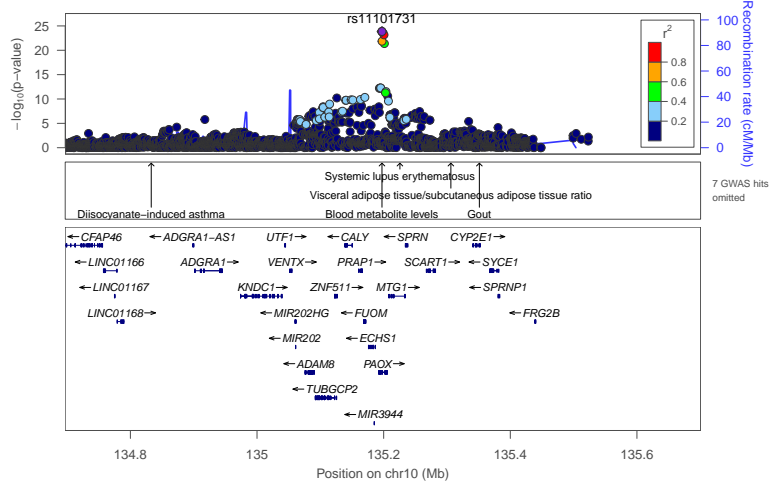

### X - 13684

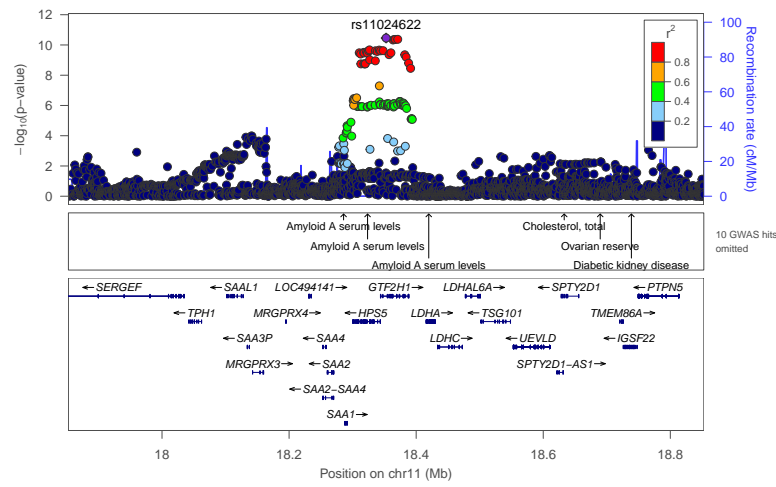

### X - 23654

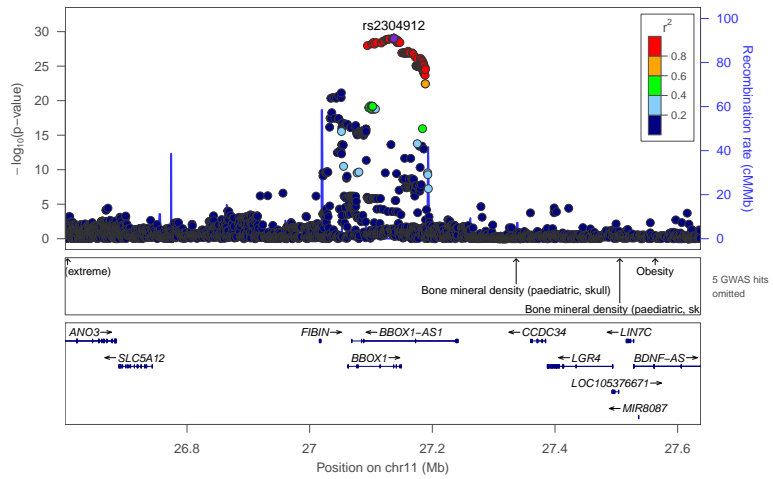

### X - 24801

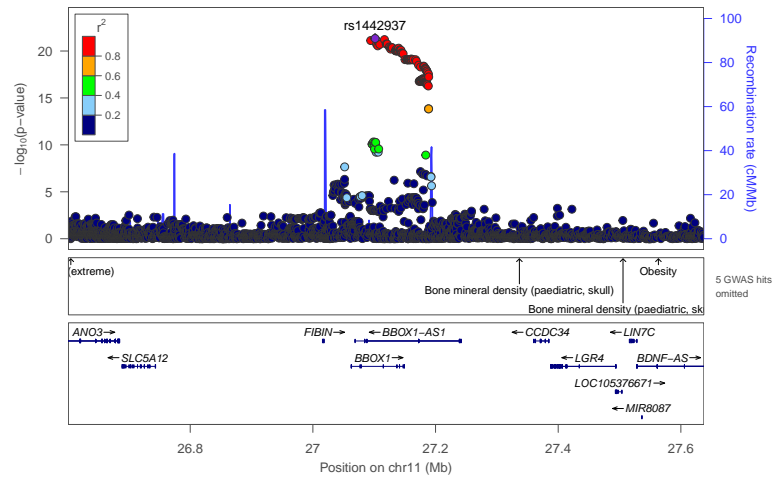

### X - 17357

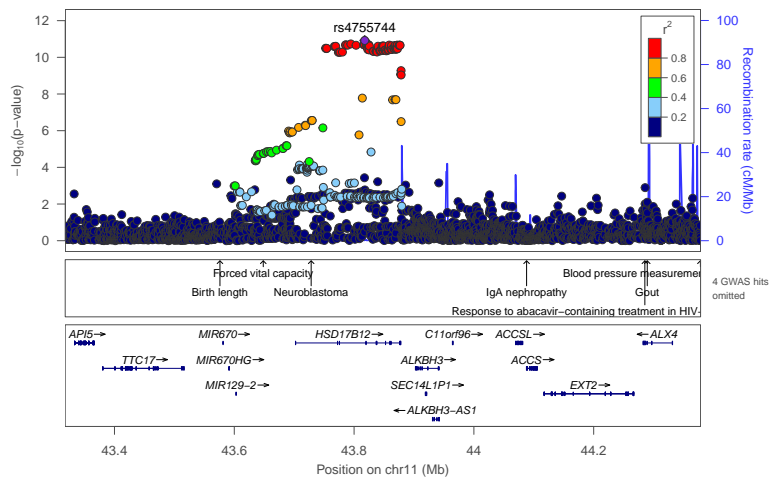

### X - 18886

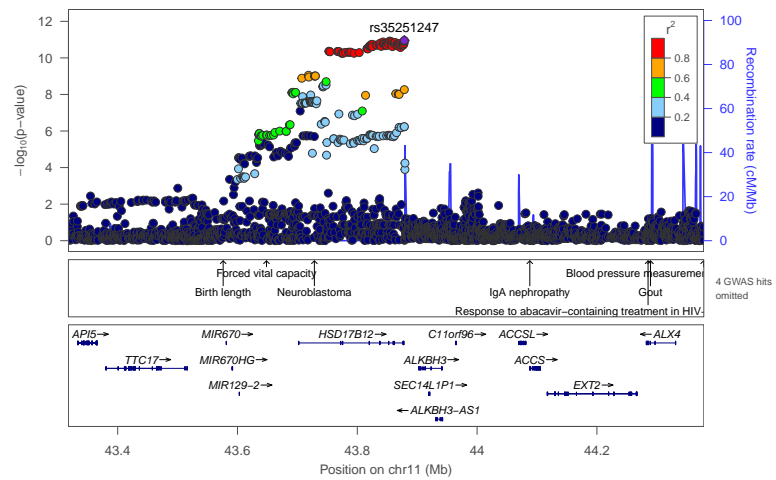

### N-acetyl-aspartyl-glutamate (NAAG)

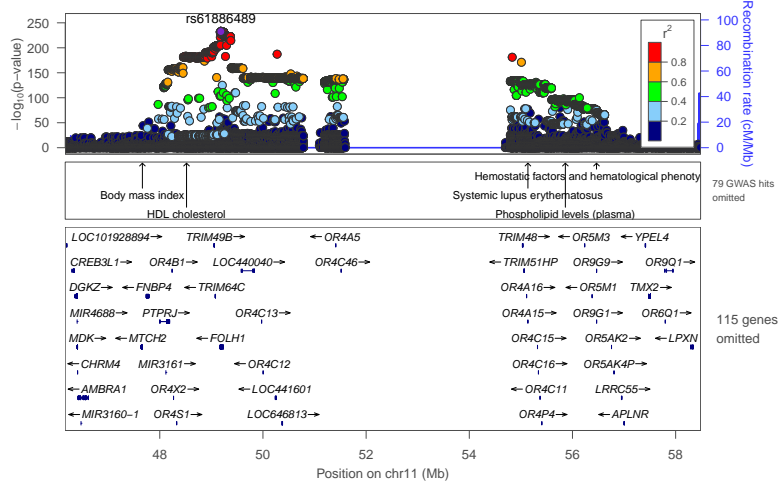

### N-acetyl-aspartyl-glutamate (NAAG)

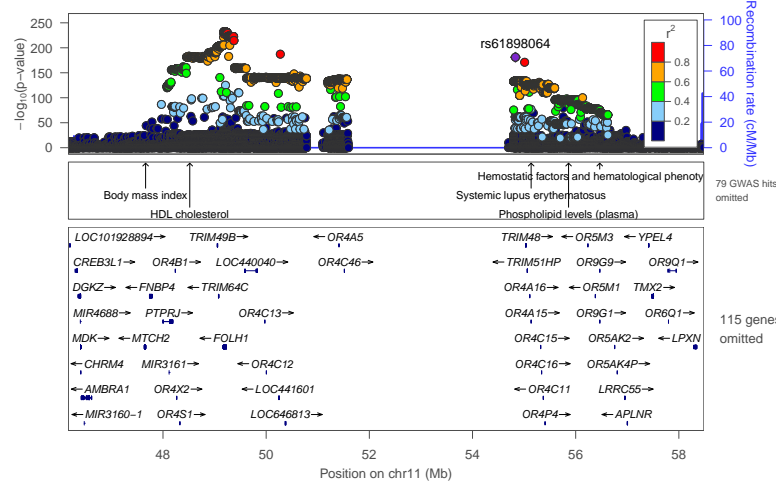

### X - 24680

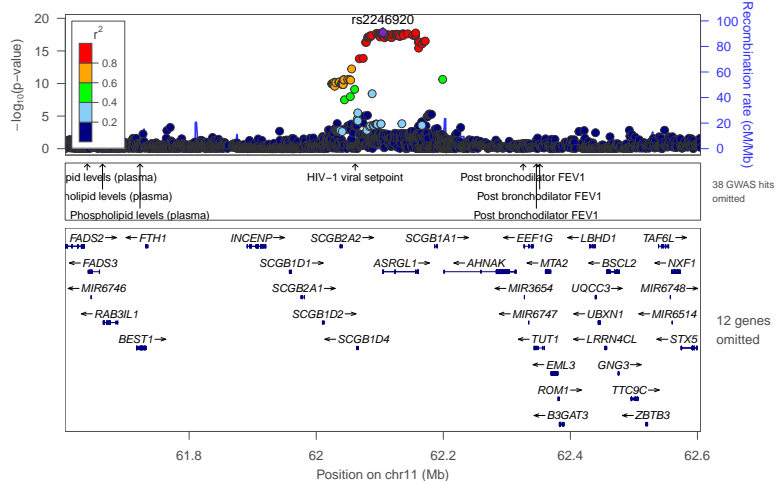

### pregnenediol-3-glucuronide

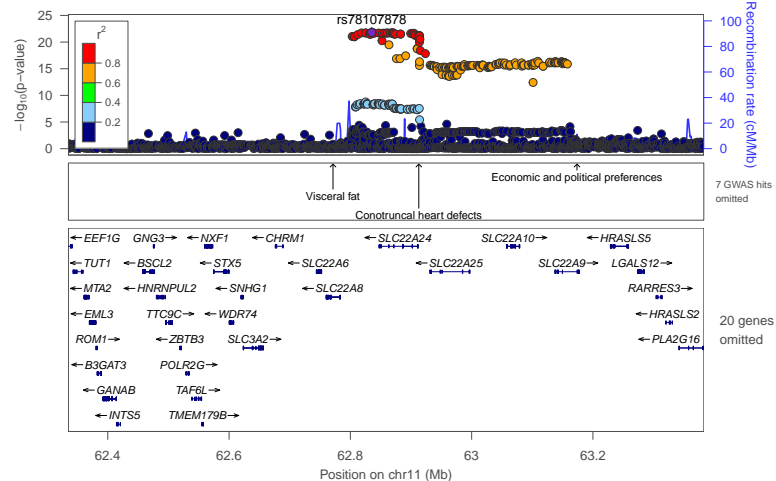

### 17alpha-hydroxypregnanolone glucuronide

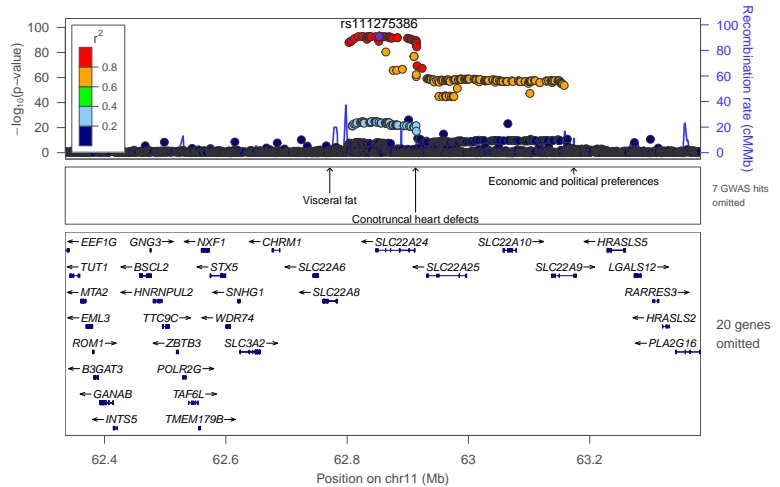

### X - 22834

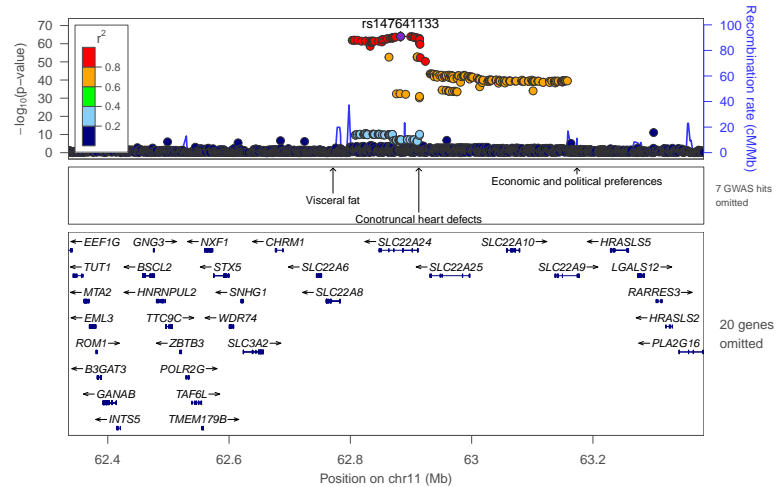



### N6,N6,N6-trimethyllysine

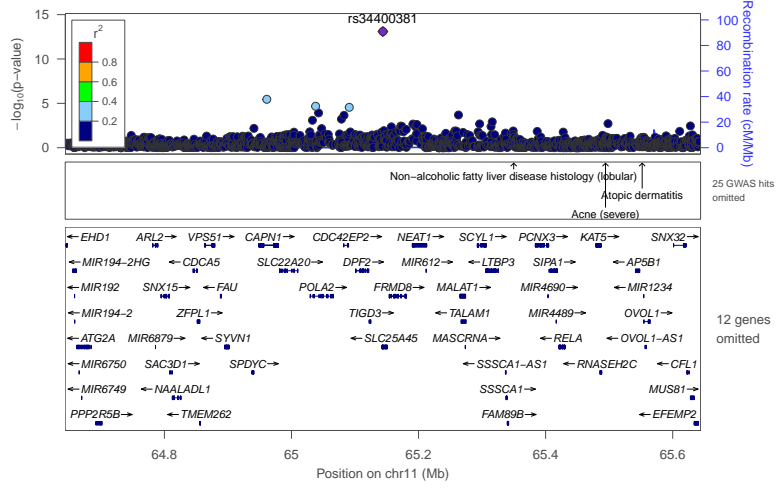

### homocarnosine

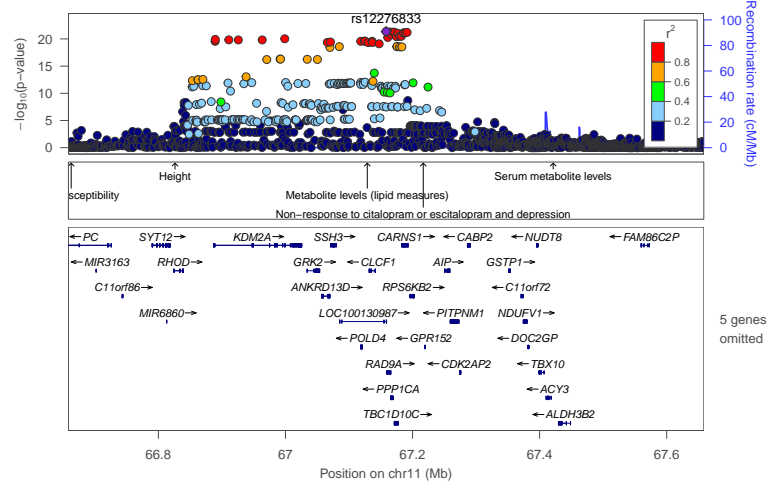

### dimethylmalonic acid

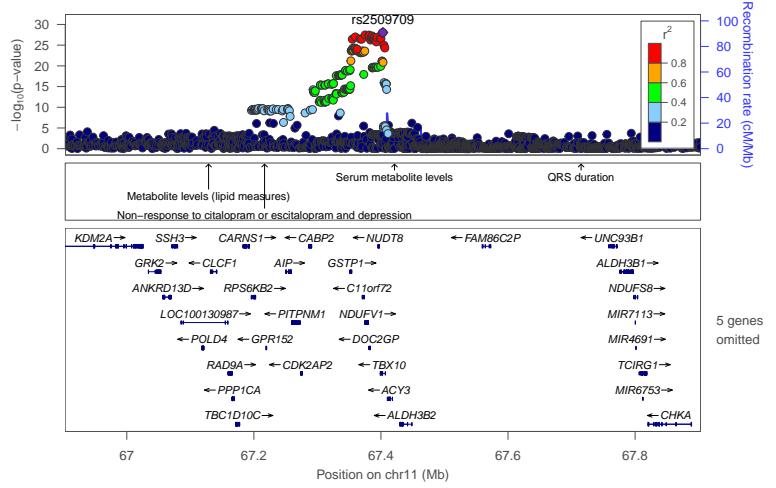

### N-acetyltyrosine

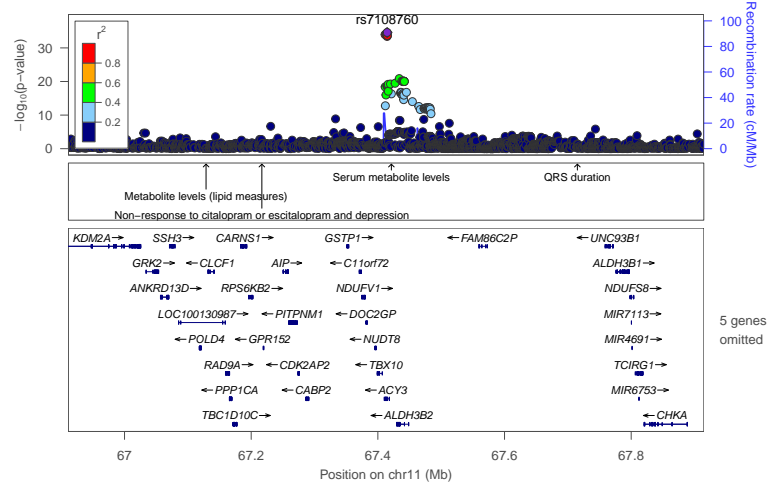

### N-acetylphenylalanine

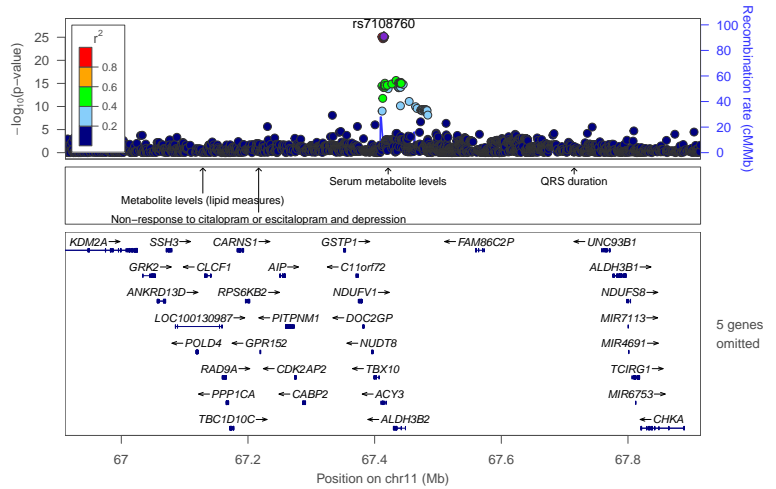

### N-acetyltryptophan

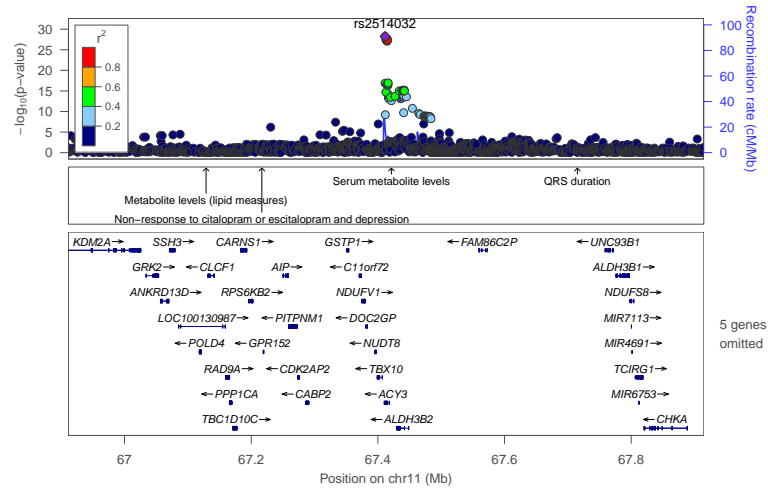

### beta-citrylglutamate

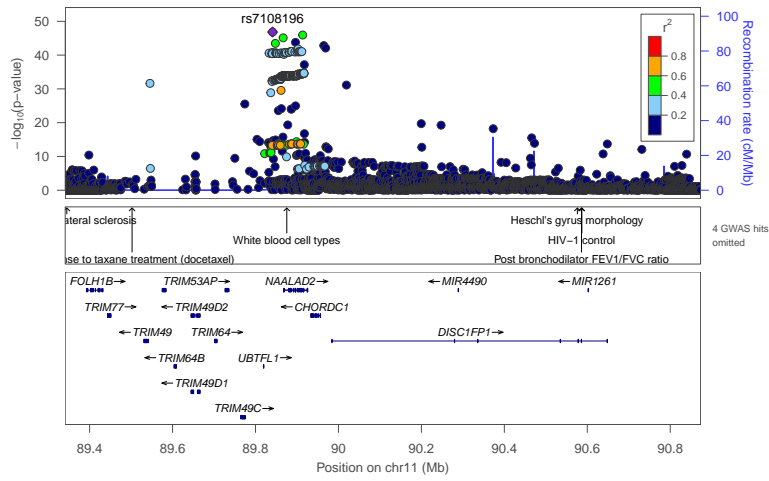

### isobutyrylglycine

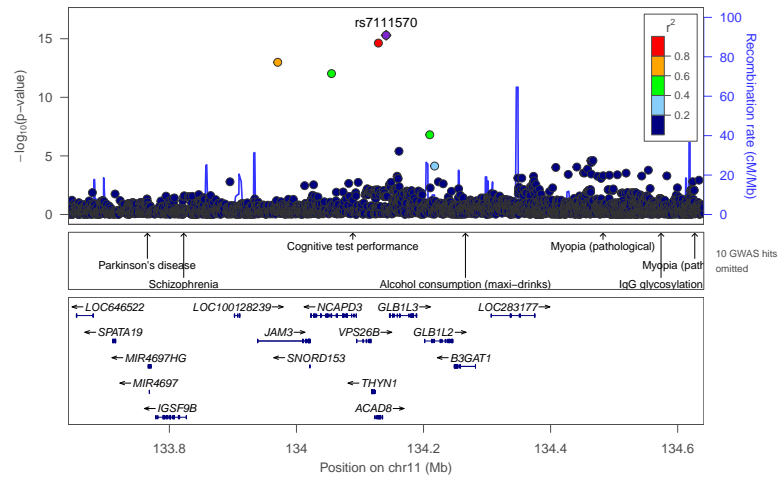

### dimethylmalonic acid

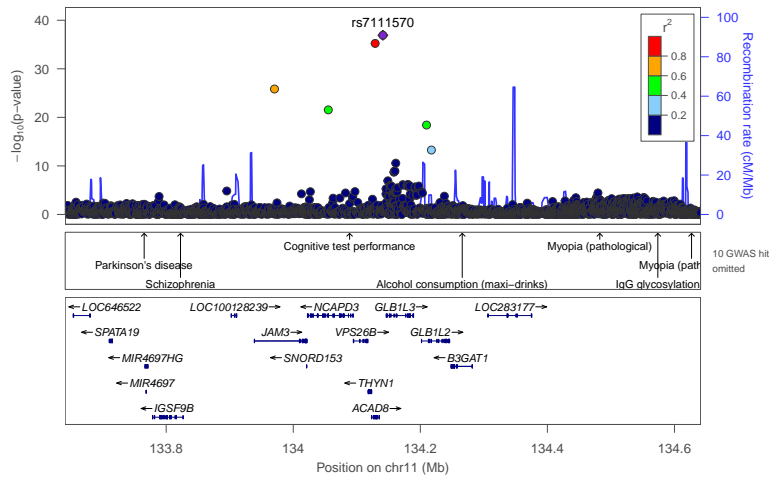

### beta-alanine

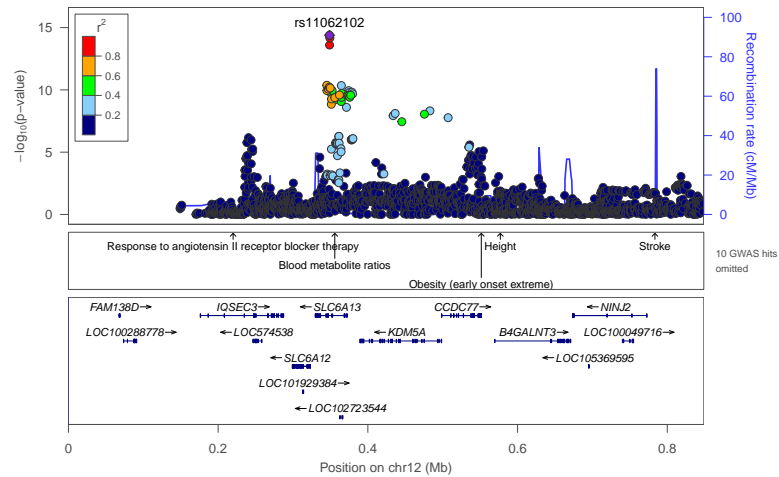

### 3-aminoisobutyrate

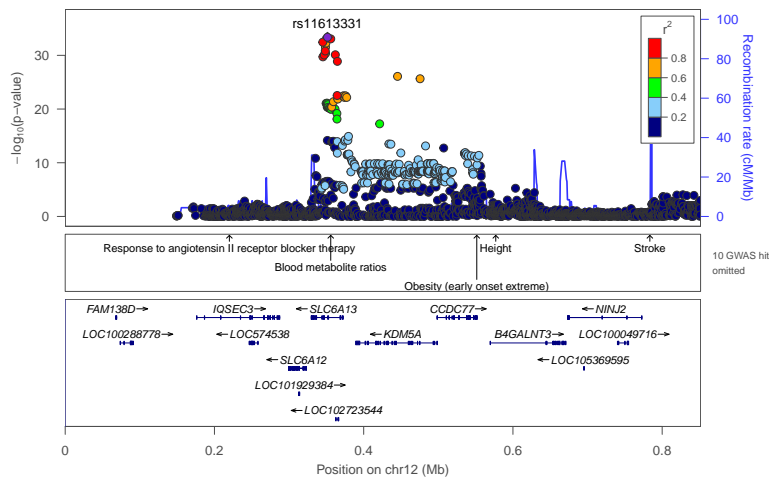

### X - 24588

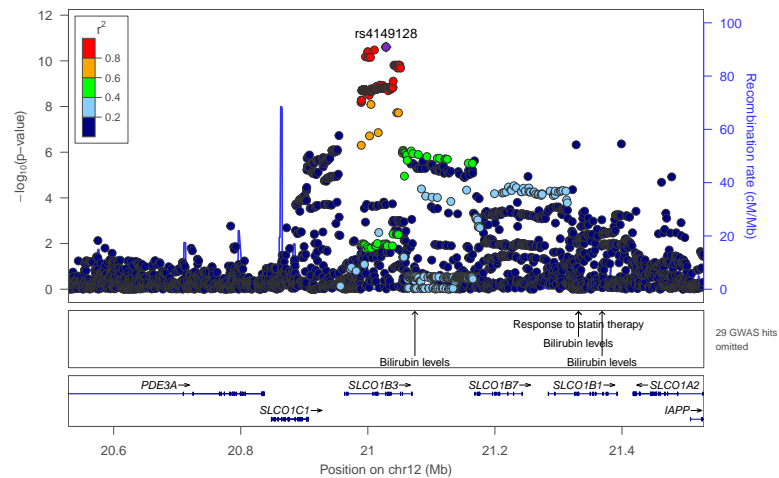

### pregnanediol-3-glucuronide

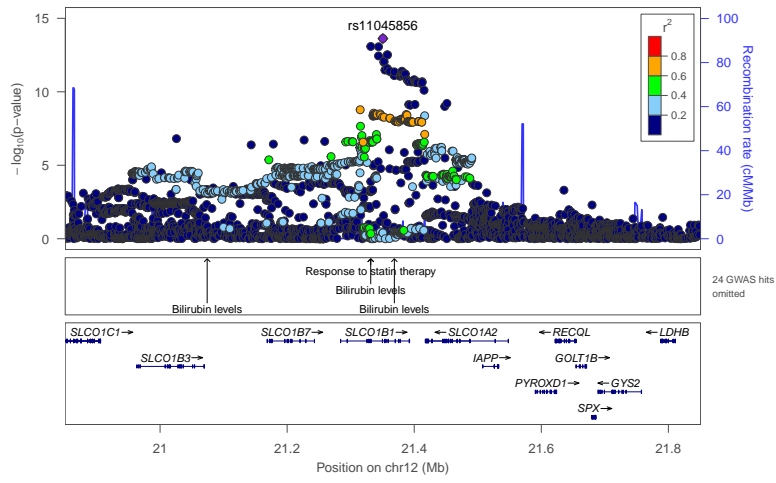

### glycocholate sulfate\*

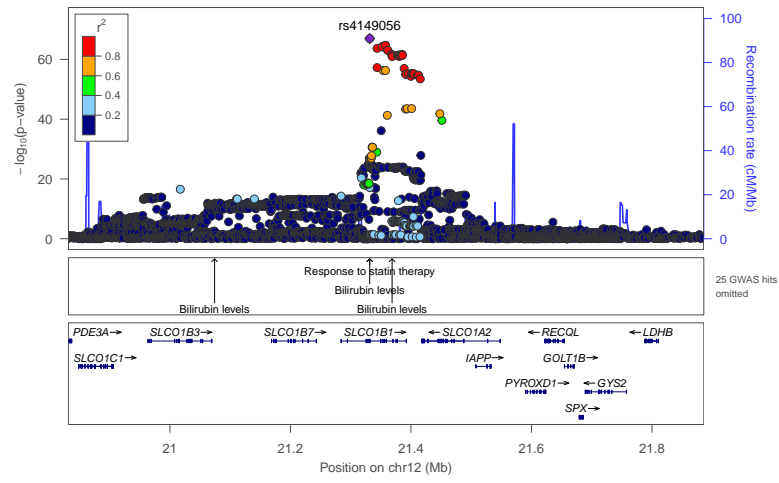

### glycolithocholate sulfate\*

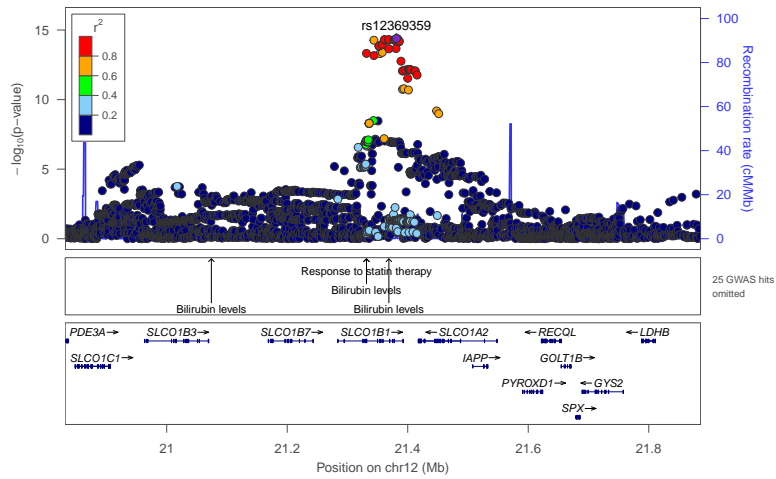

### taurocholate sulfate\*

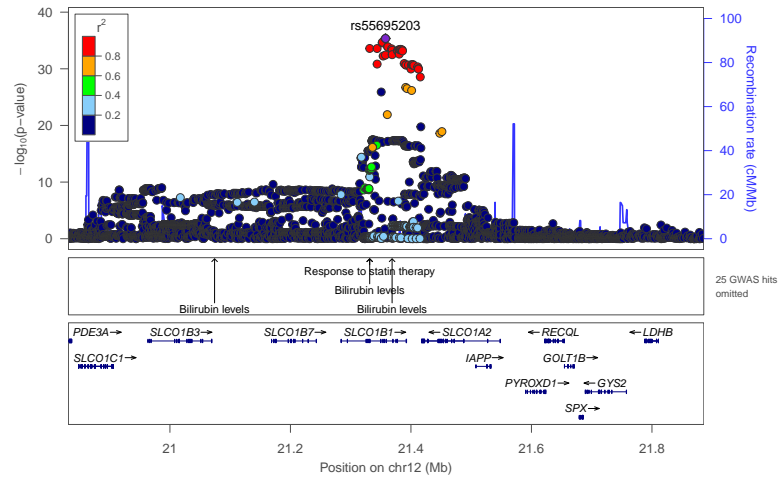

### cortisone 21-sulfate

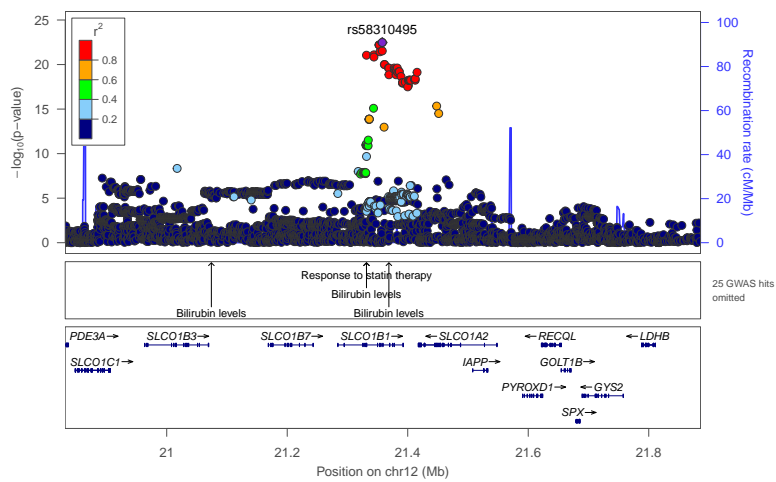

### X - 21467

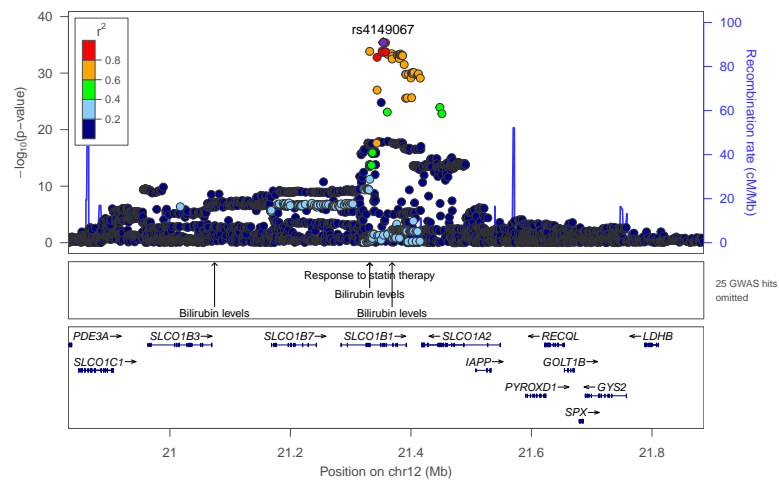

X - 21470

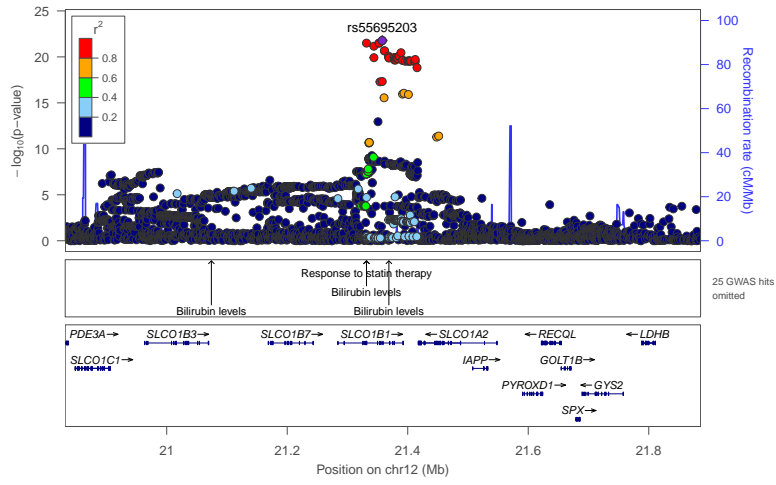

deoxycholic acid 12-sulfate\*

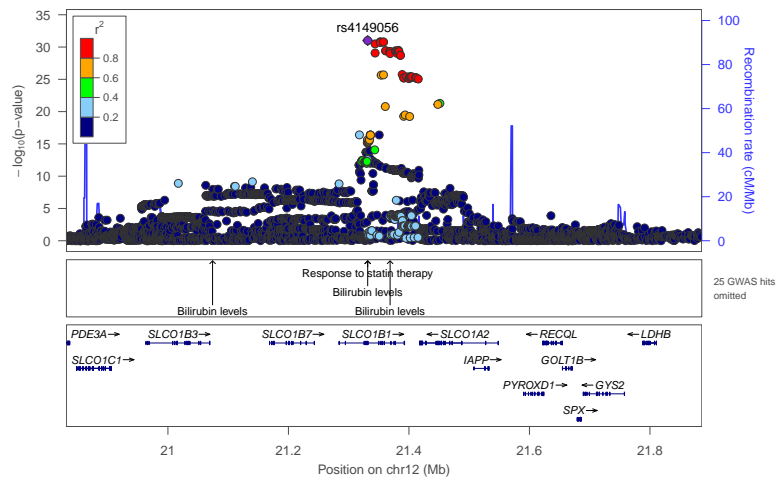

X - 17704

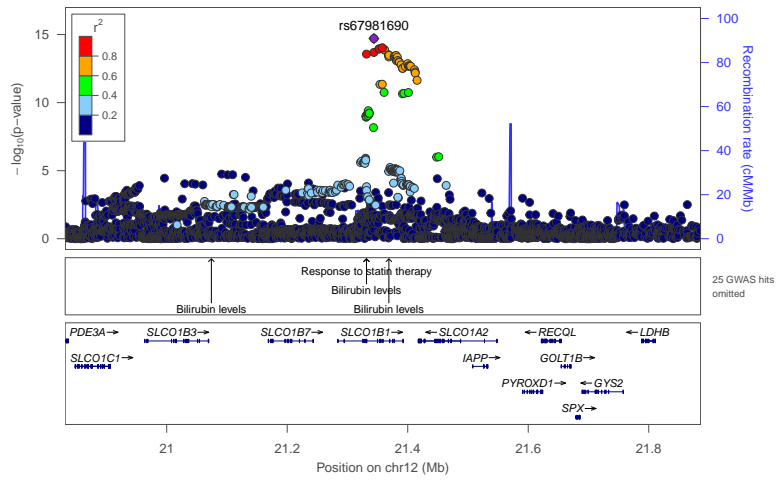

X - 17765

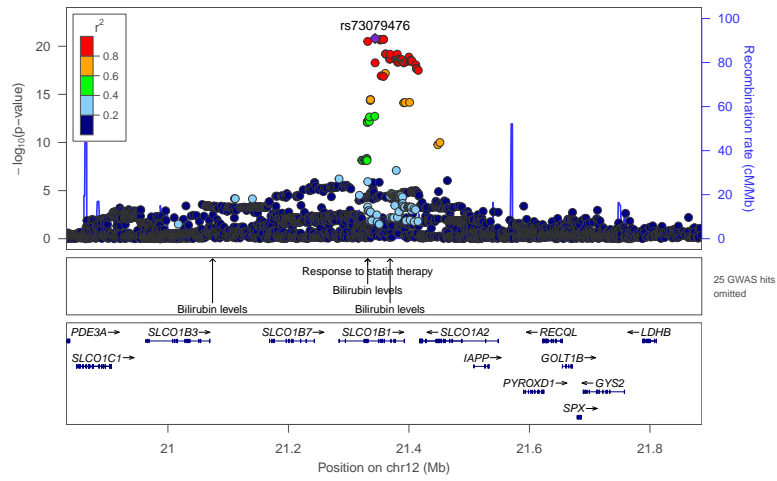

X - 24546

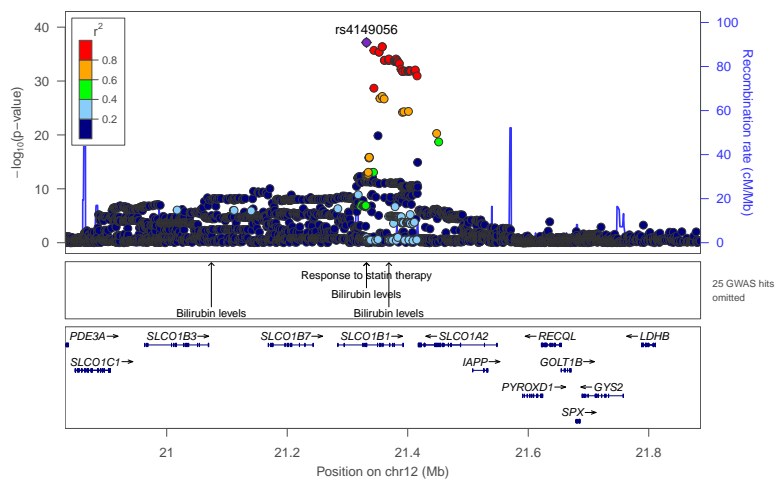

glycodeoxycholate 3-sulfate

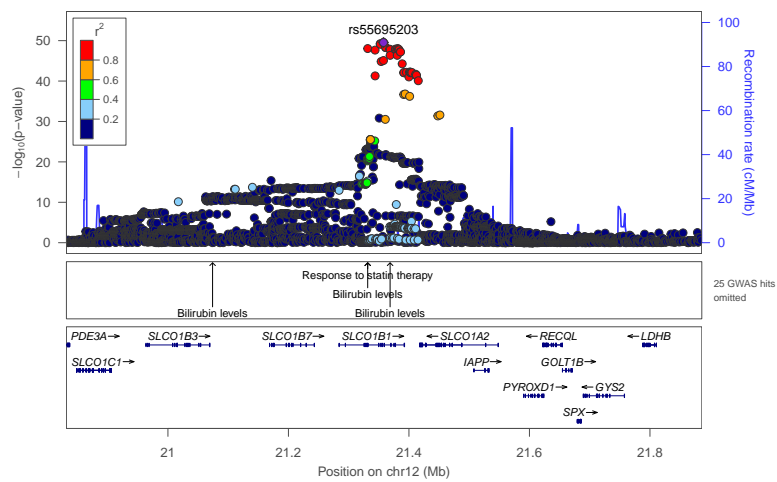

glycochenodeoxycholate glucuronide (1)

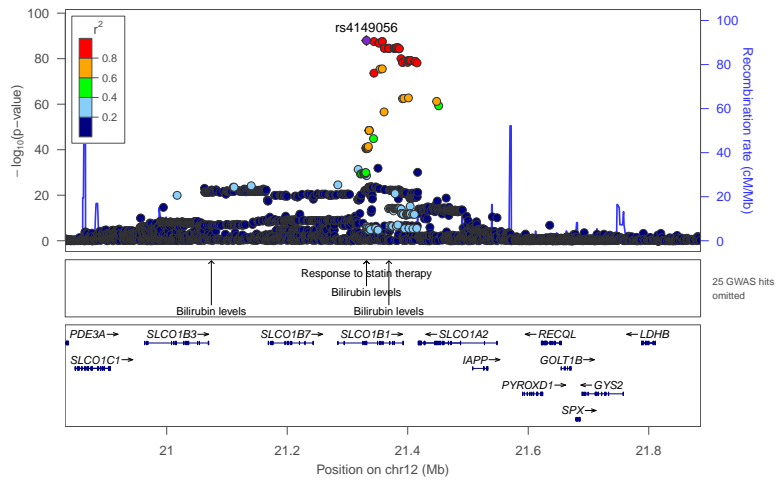

X - 24660

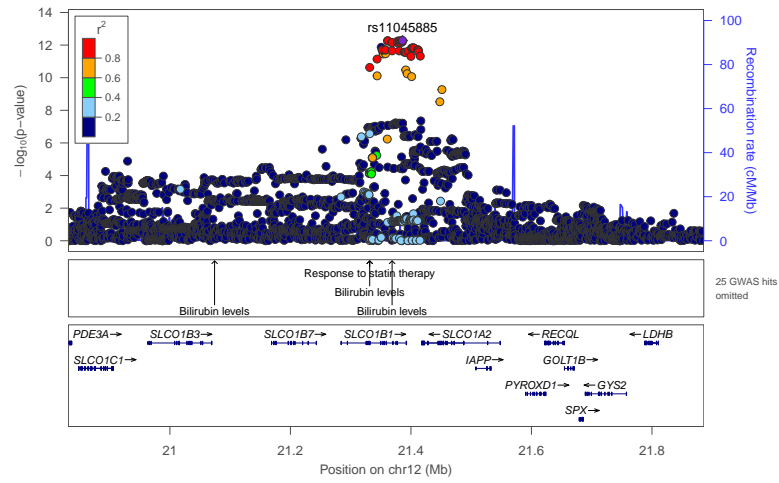

gamma-CEHC sulfate

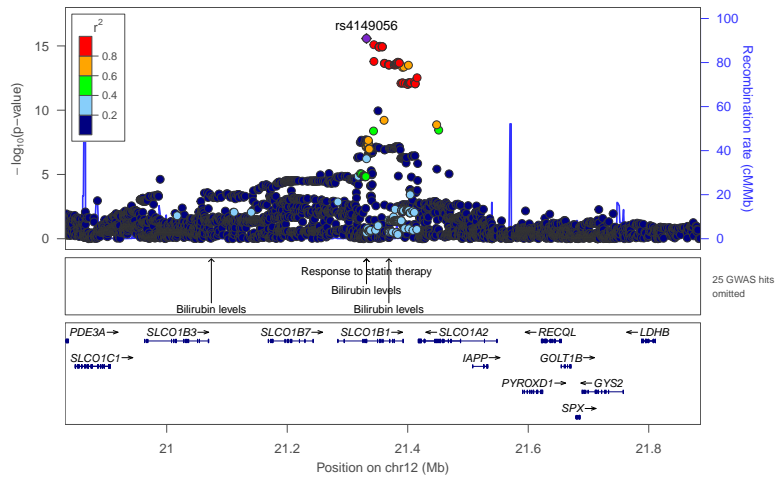

taurodeoxycholic acid 3-sulfate

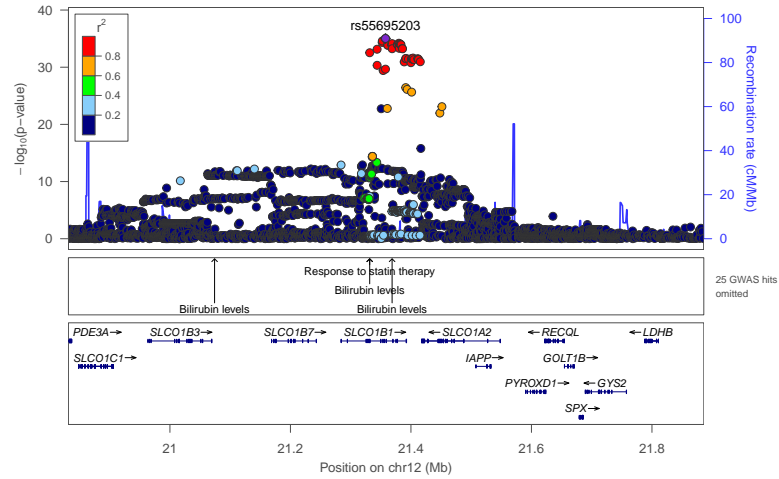

trans-urocanate

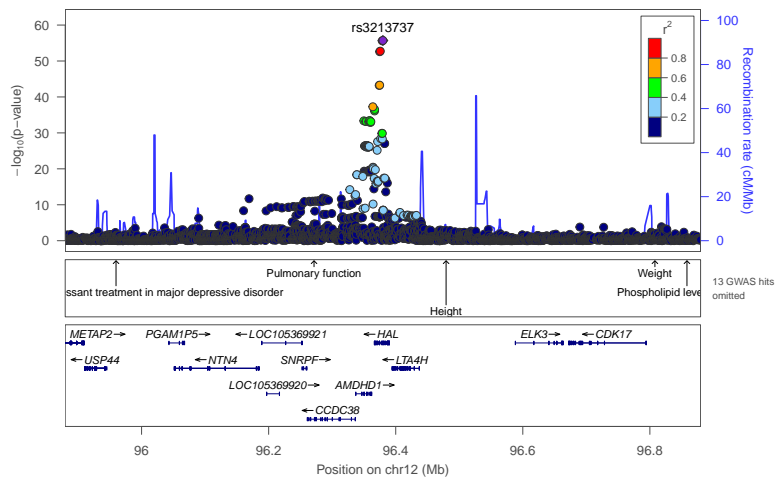

N,N,N-trimethyl-alanylproline betaine (TMAP)

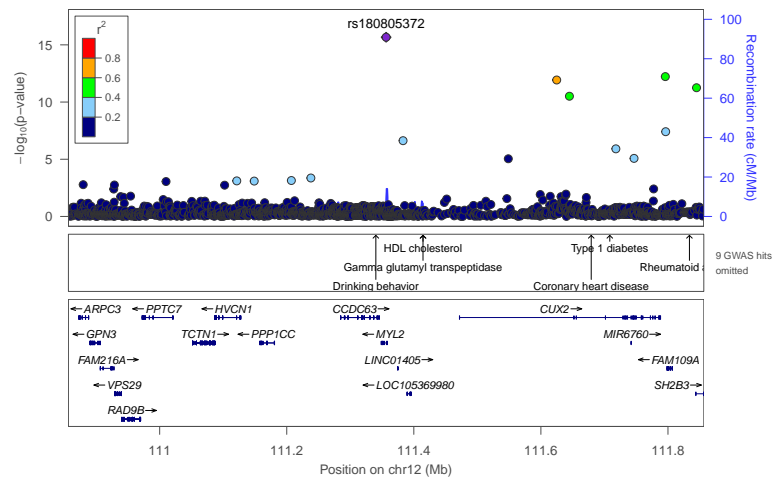

### methylsuccinate

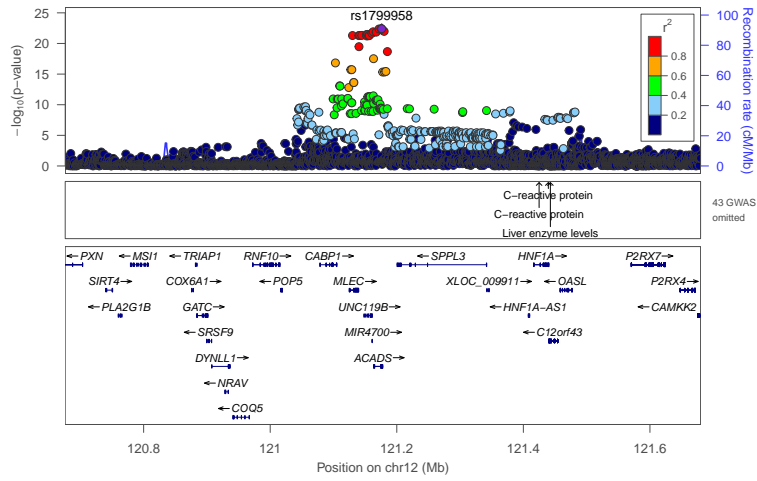

### ethylmalonate

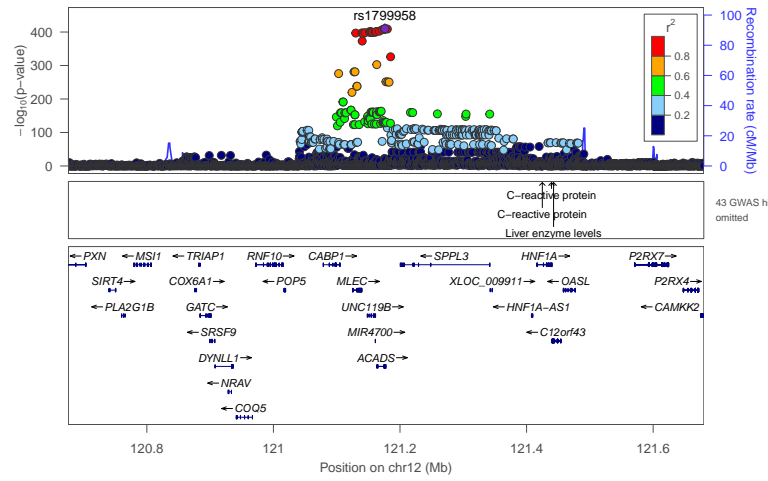

### methylsuccinoylcarnitine

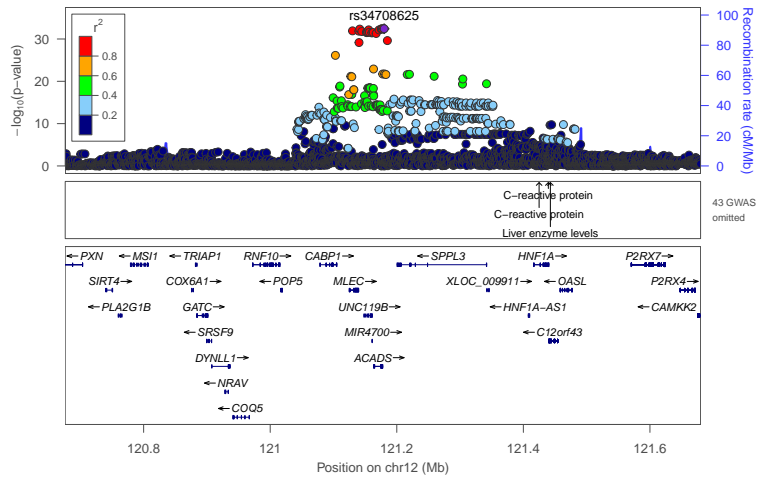

### 2-hydroxyphenylacetate

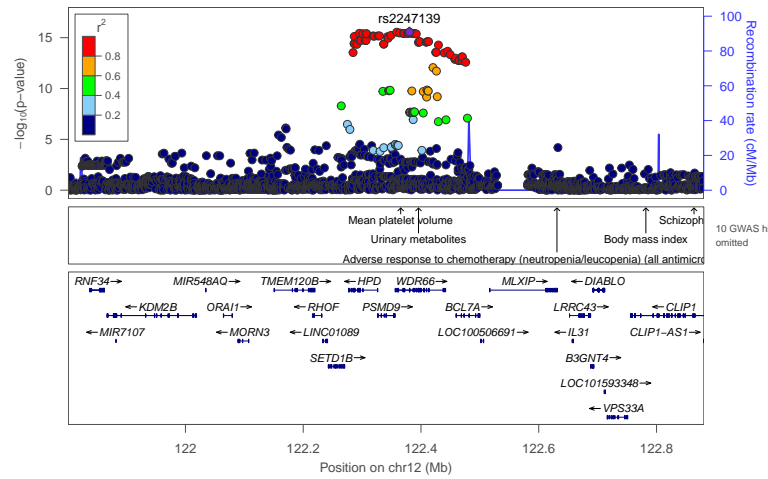

### 4-hydroxyphenylpyruvate

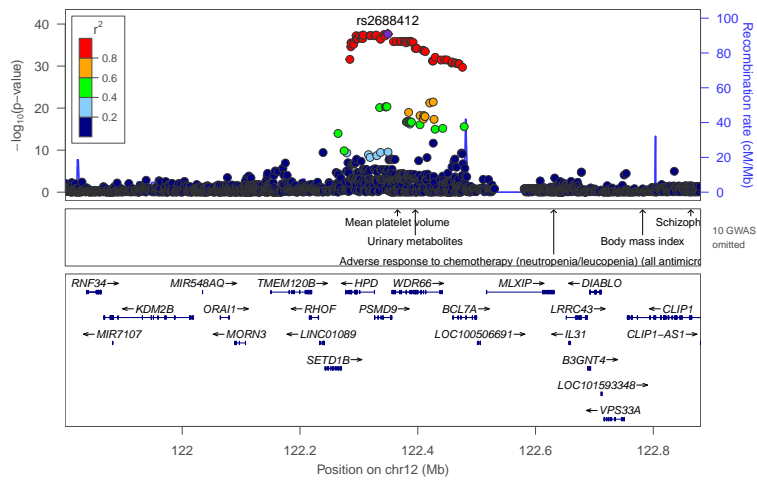

### caffeate

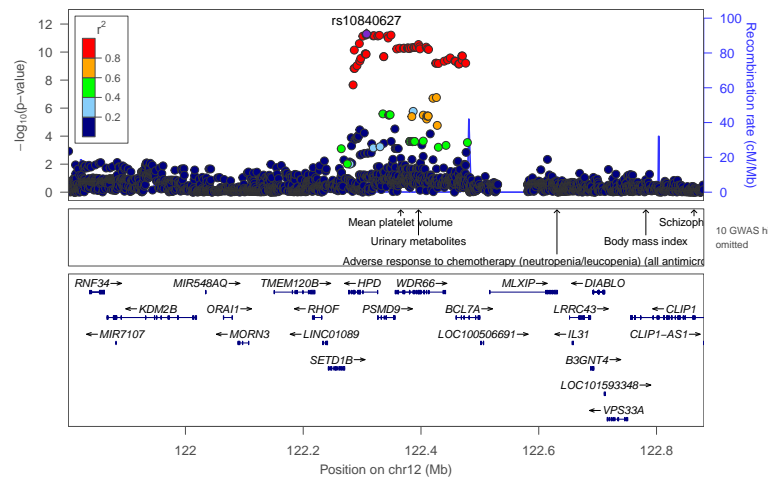



### alpha-hydroxyisovalerate

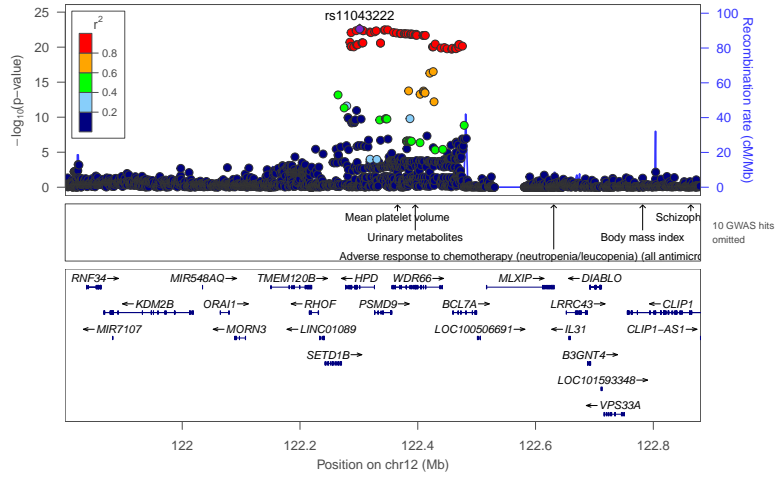

### 2-hydroxybutyrate/2-hydroxyisobutyrate

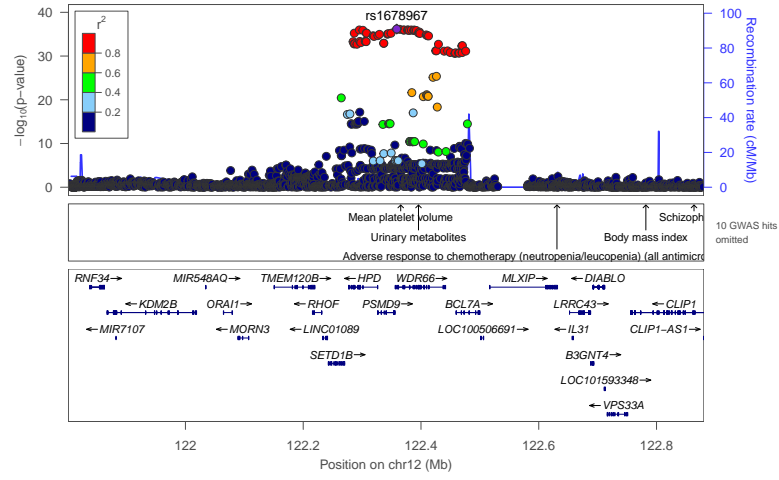

### X - 19913

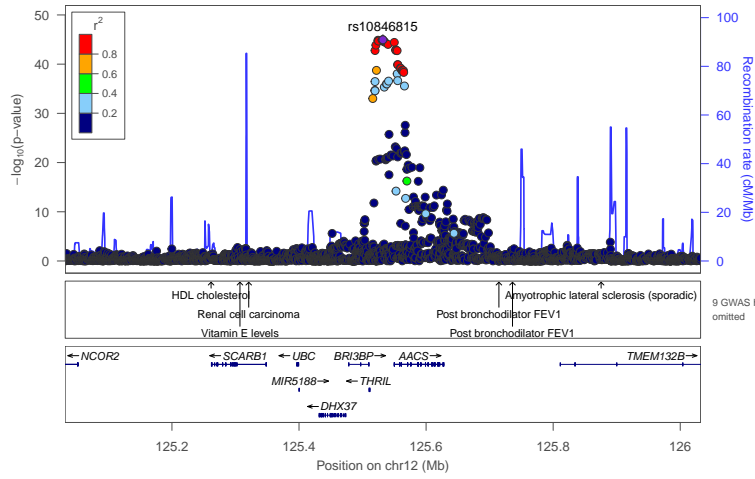

### argininosuccinate

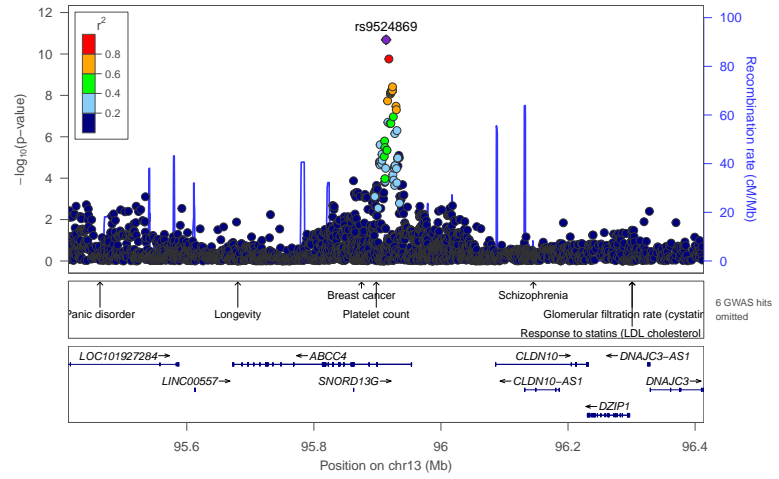

### N-acetylcarnosine

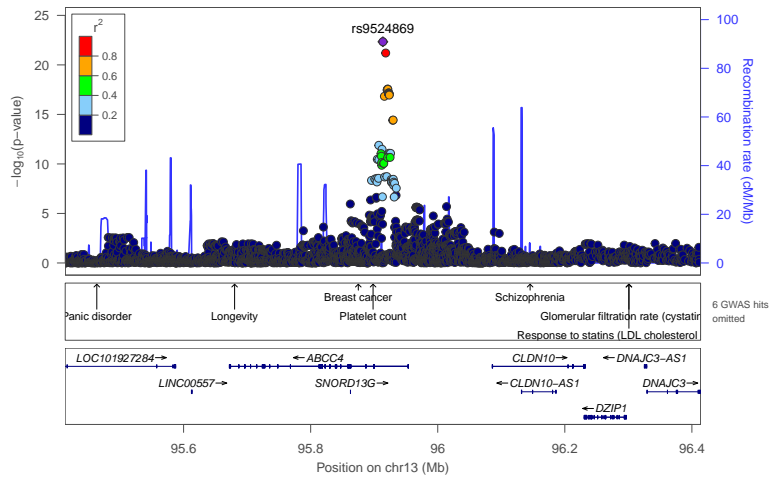

### guanosine-3',5'-cyclic monophosphate (cGMP)

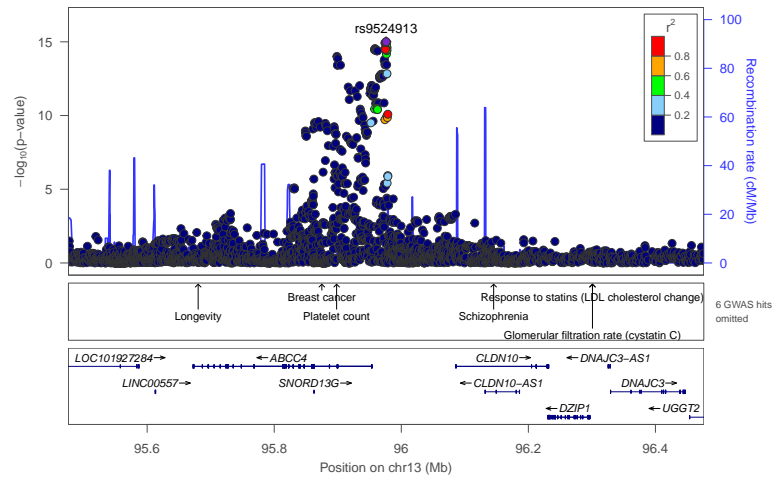

### 2-methylcitrate

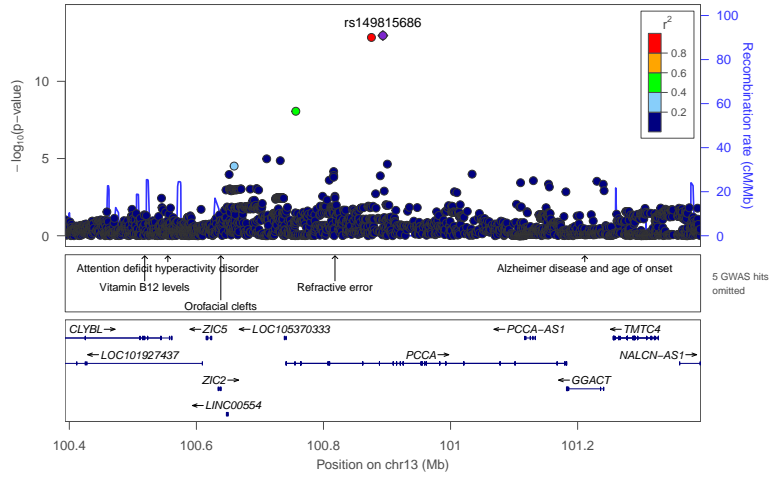

### glycocholate

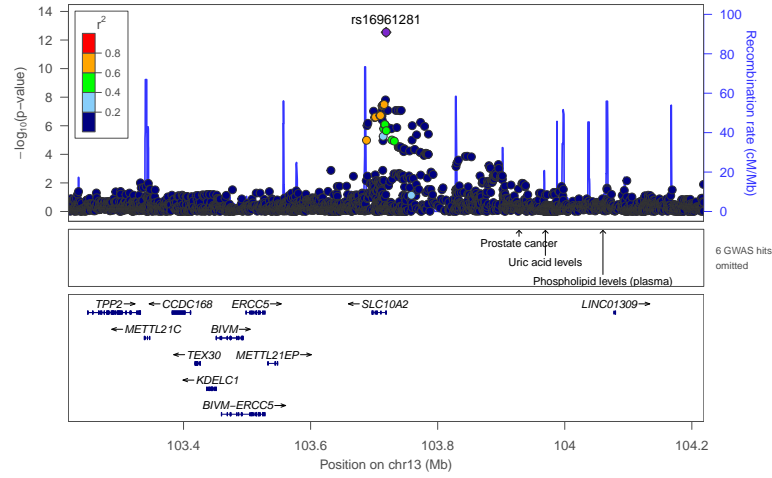

### N2-methylguanosine

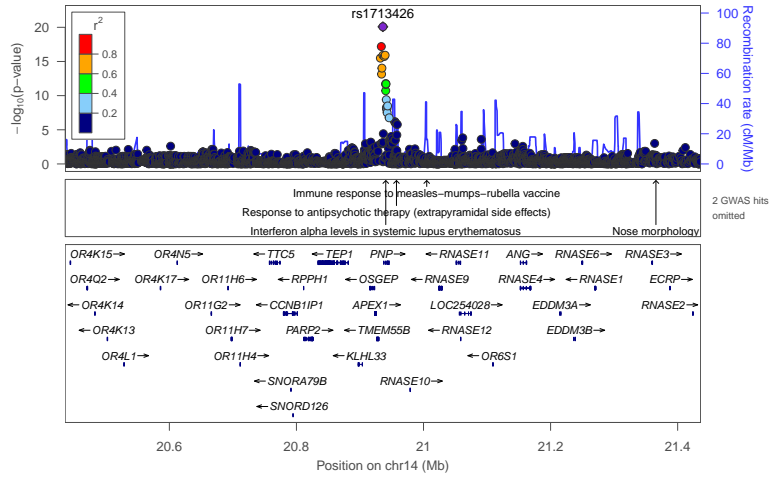

### 2'-deoxyguanosine

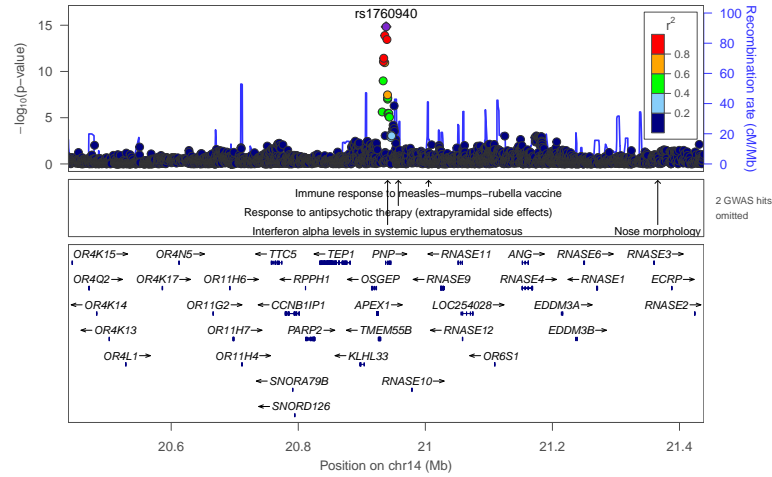

### 2-hydroxyglutarate

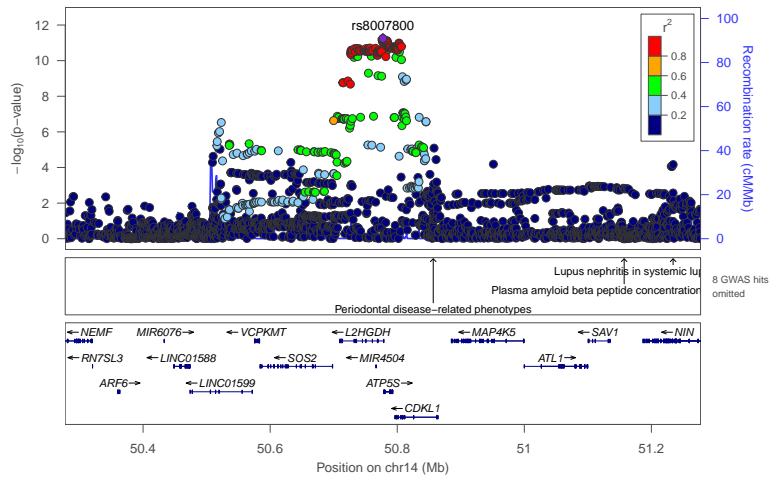

### glucosaminiate

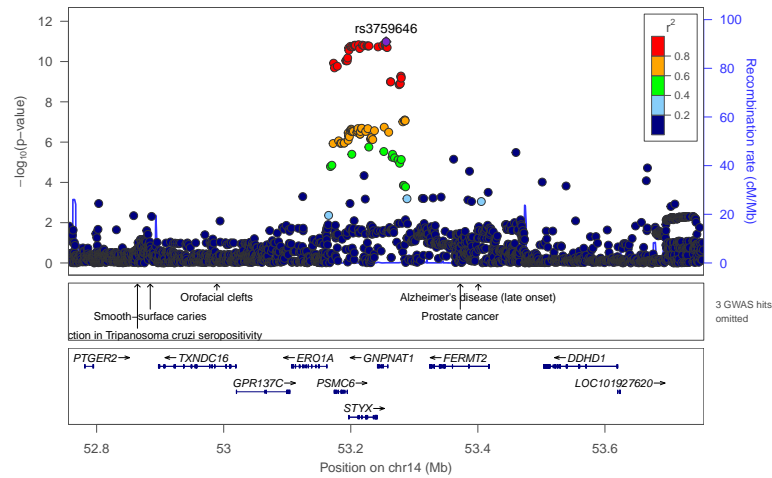

### neopterin

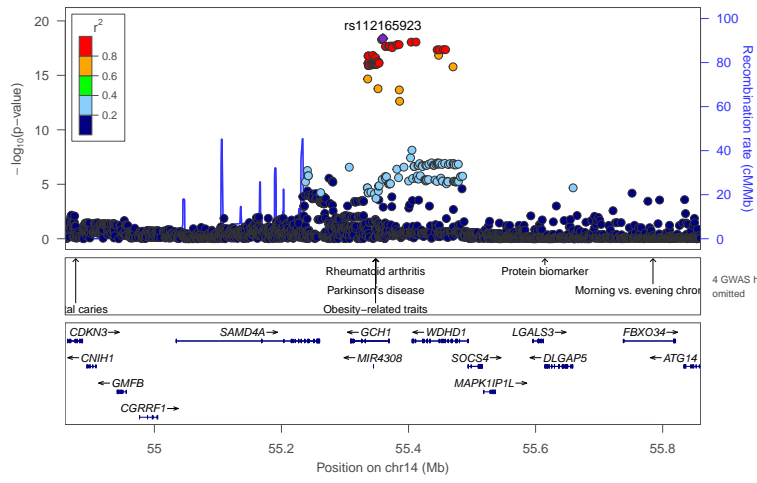

### biopterin

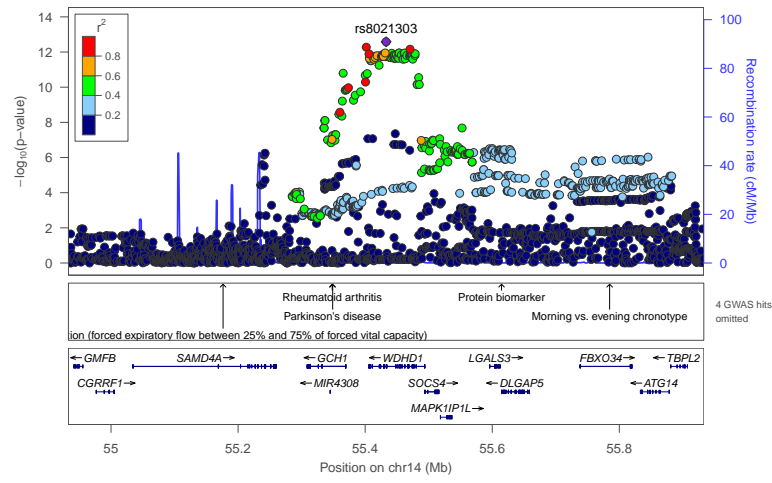

### 4-octenedioate

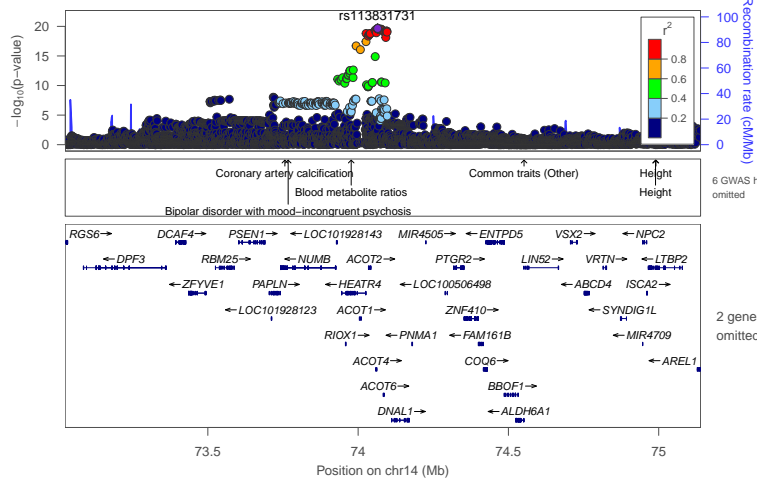

### decadienedioic acid (C10:2-DC)\*\*

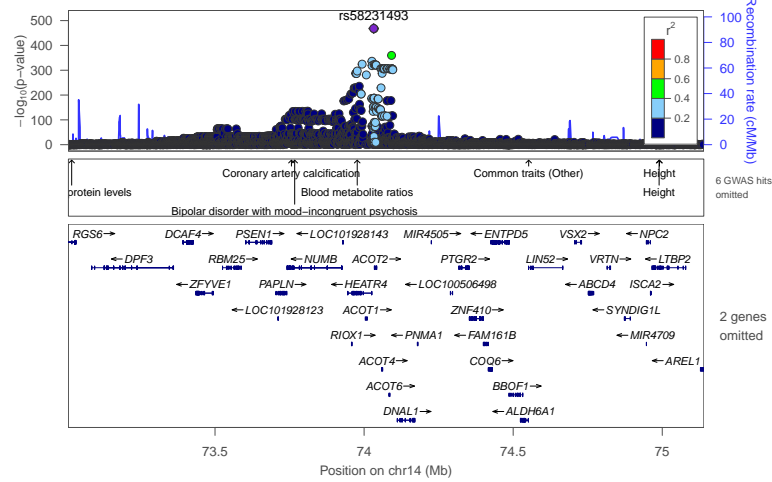

### X - 17682

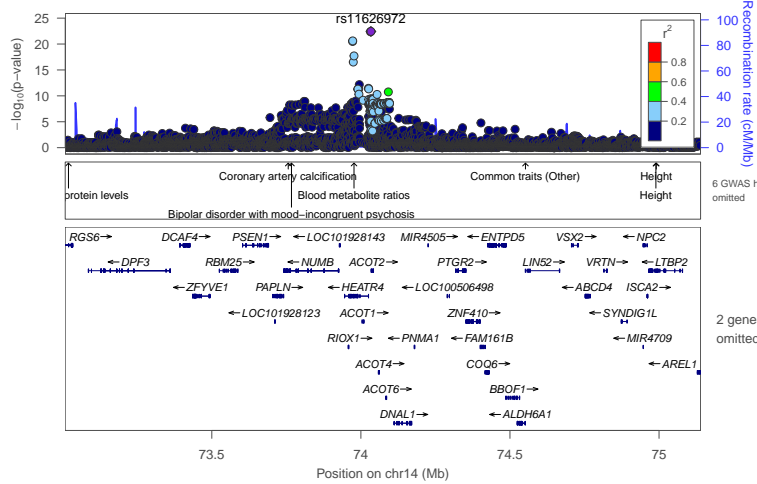

### X - 24330

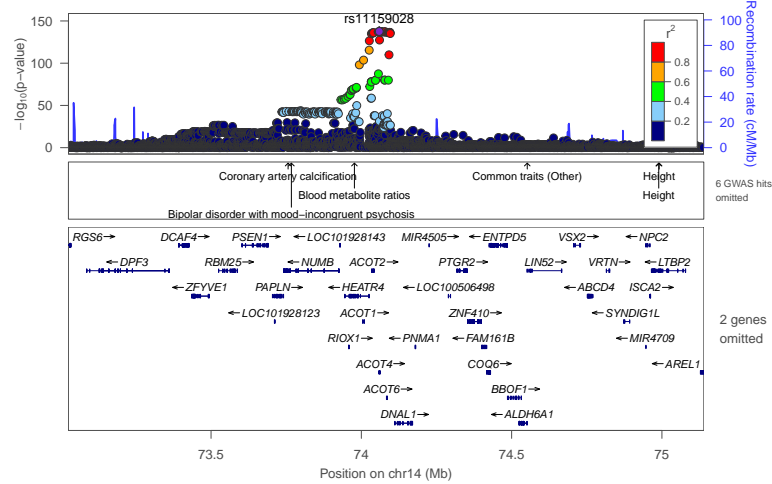

X - 24588

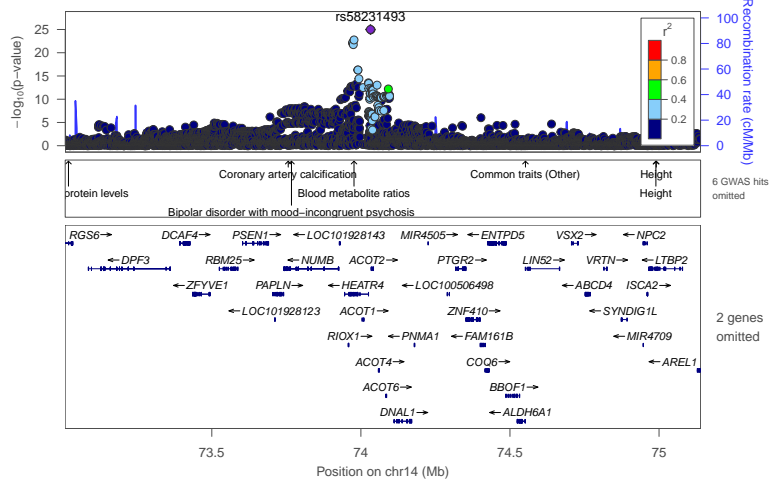

X - 24799

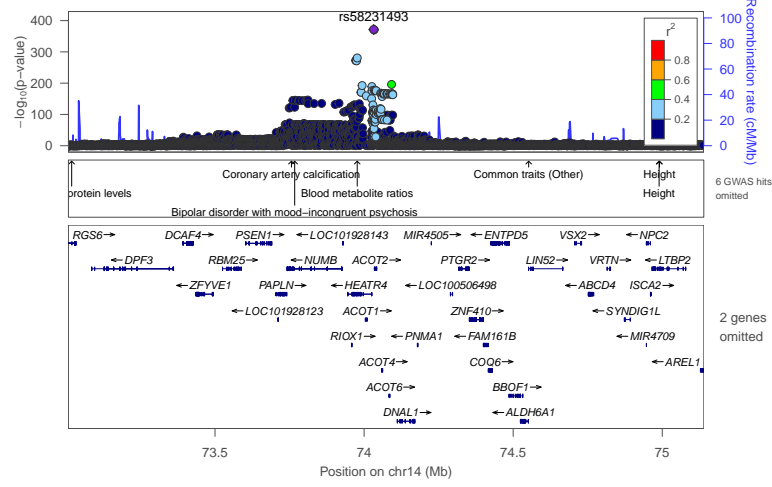

isocaproilglutamine

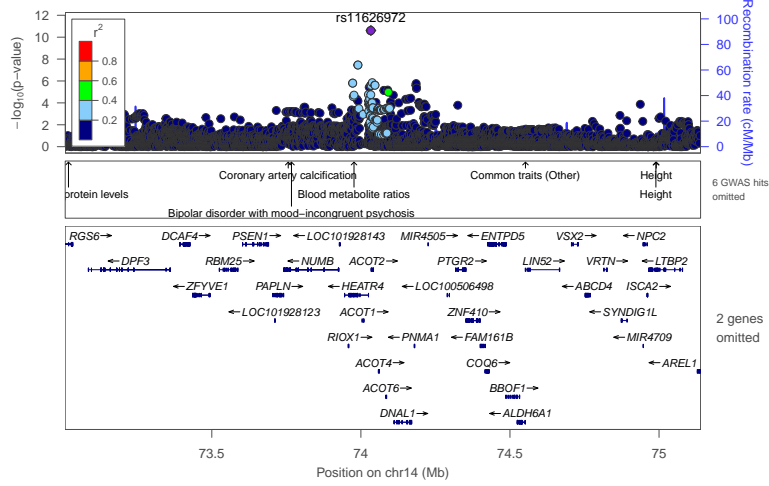

nonenedioate (C9:1-DC)\*

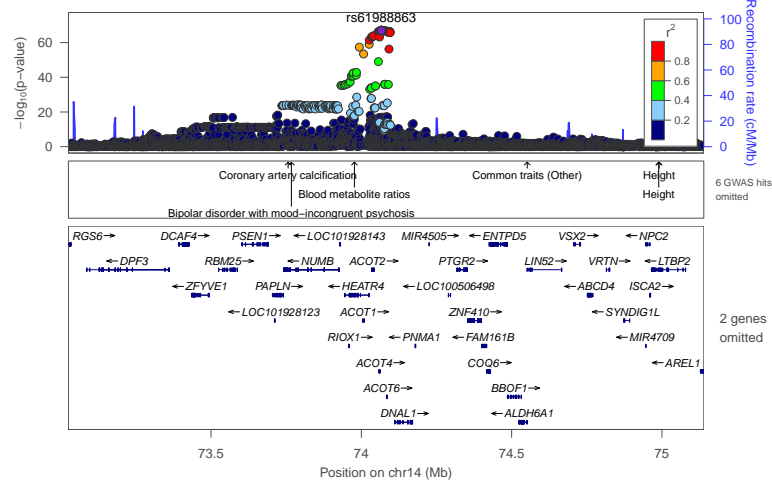

glucuronide of C10H18O2 (12)\*

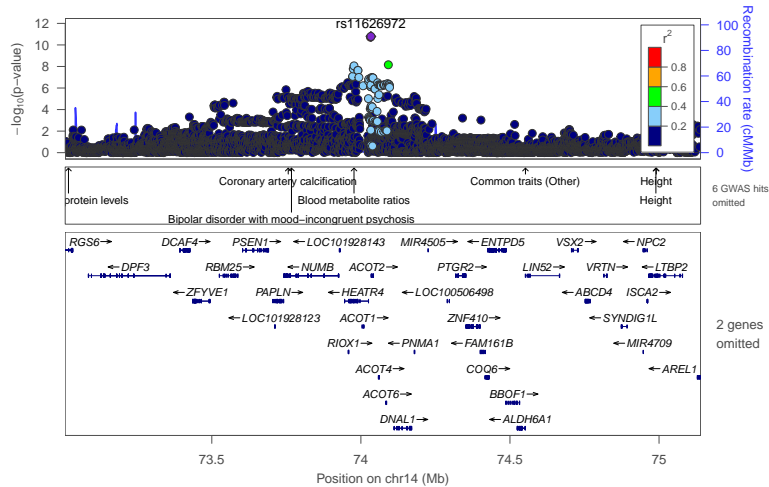

X - 24519

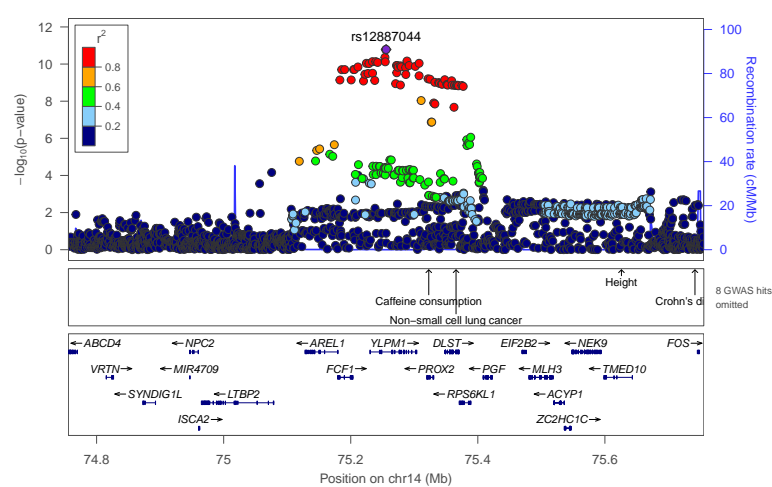

### isocitric lactone

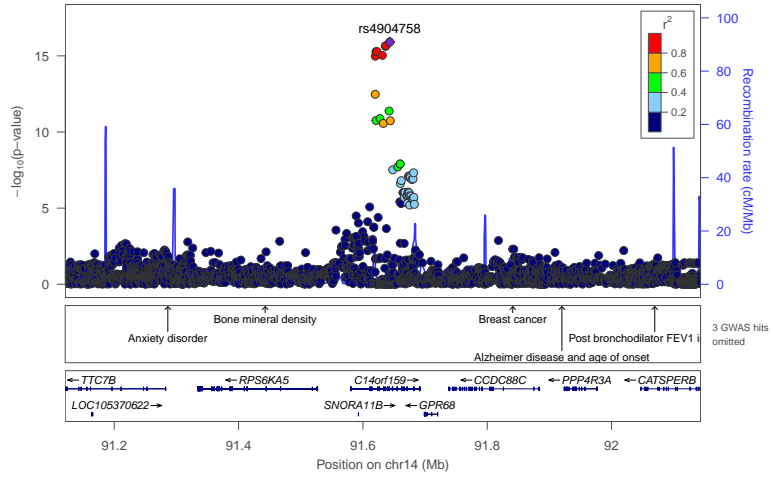

### glutamate

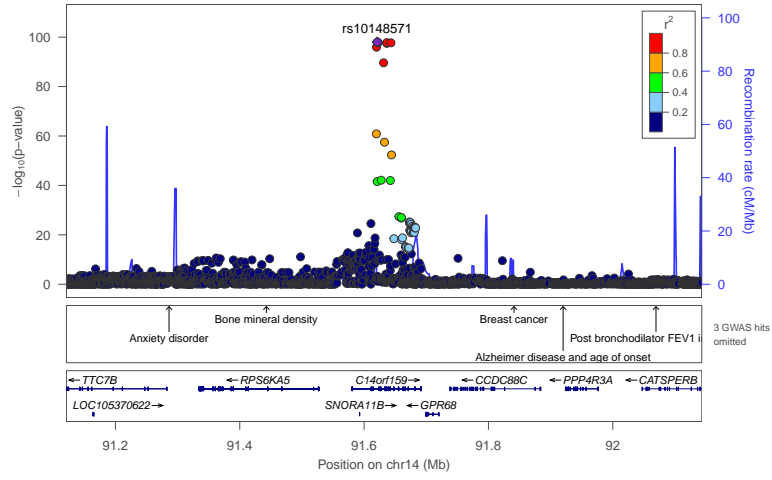

### homoarginine

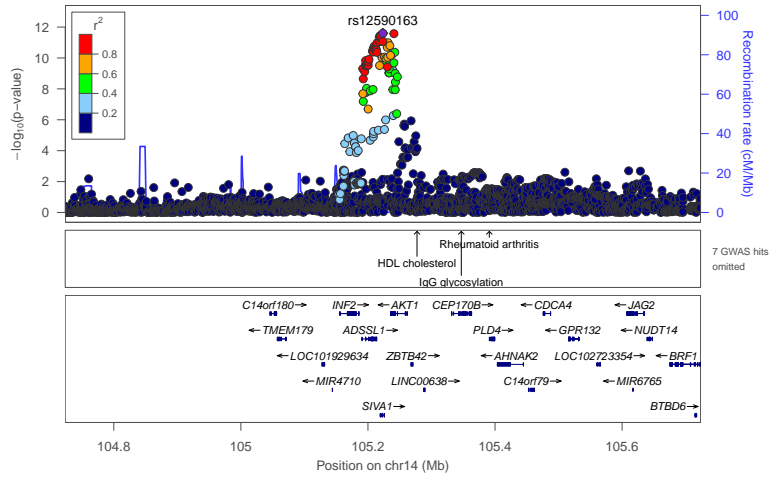

### isovalerylgutamine

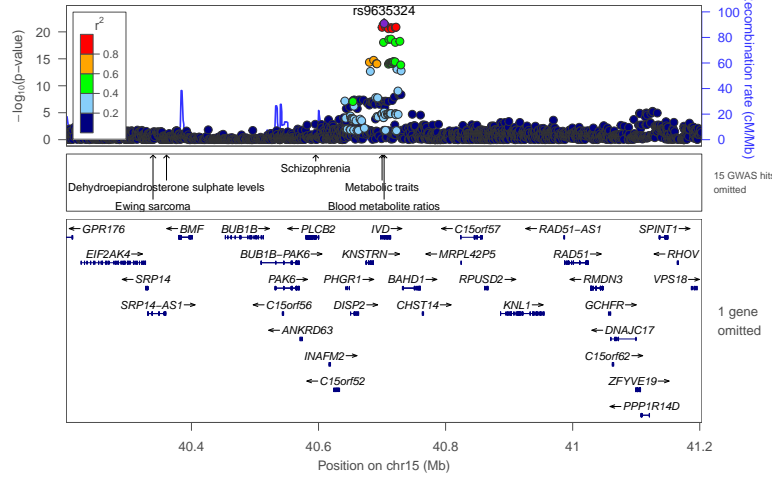

### adenosine

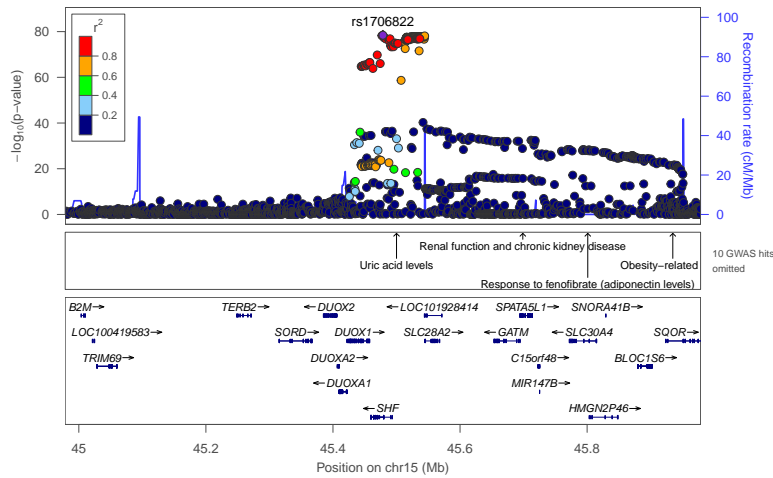

### inosine

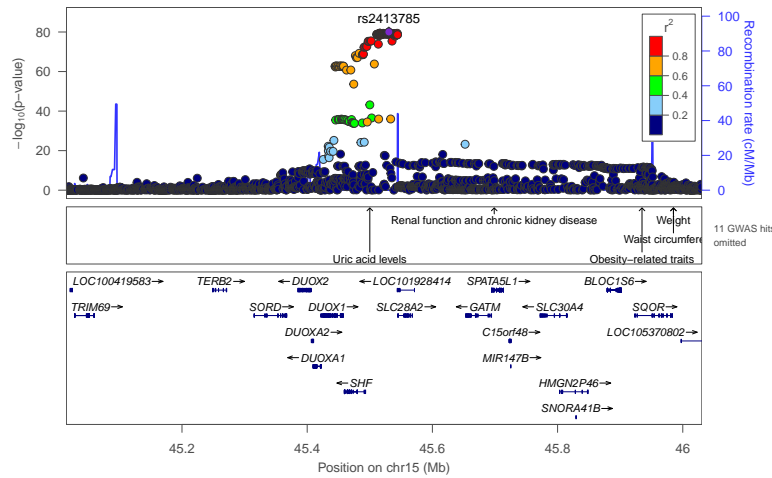

### guanosine

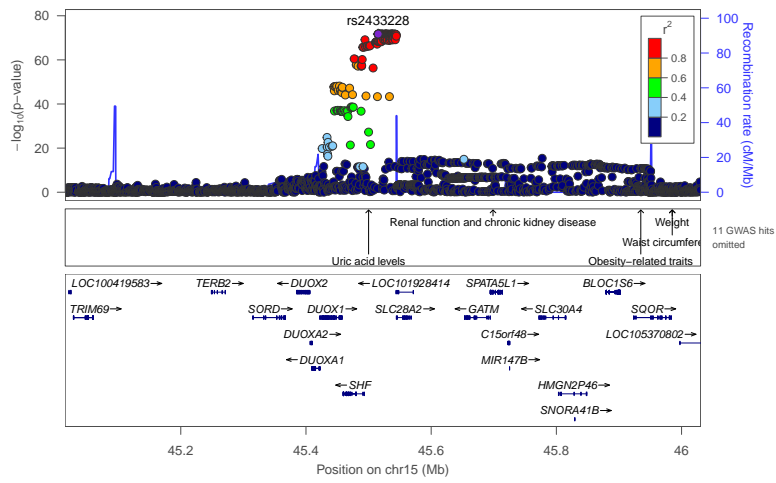

### X - 24796

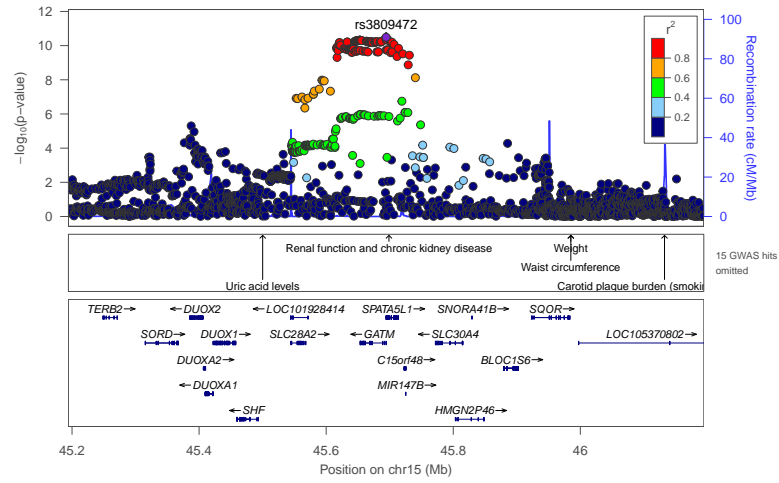

### succinylcarnitine (C4-DC)

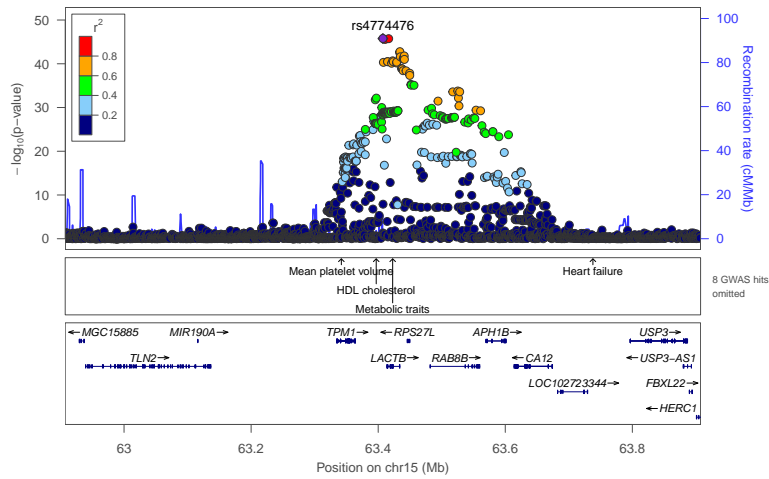

### glutaryl carnitine (C5-DC)

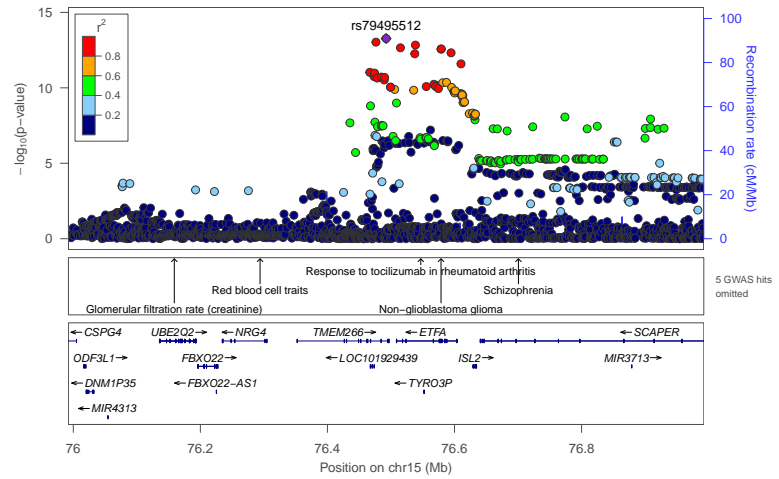

### 2'-O-methyluridine

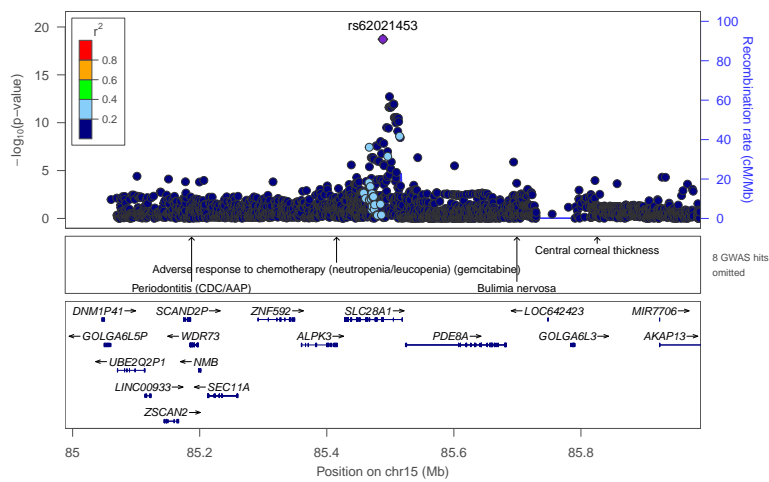

### X - 24339

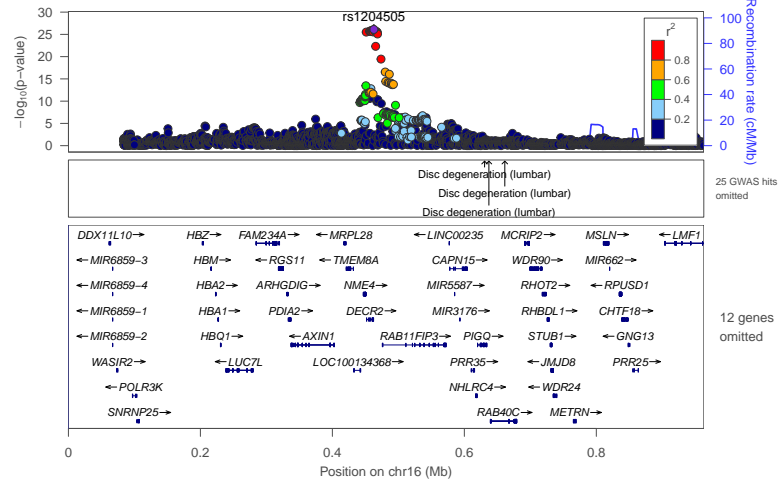



### 3-(3-hydroxyphenyl)propionate

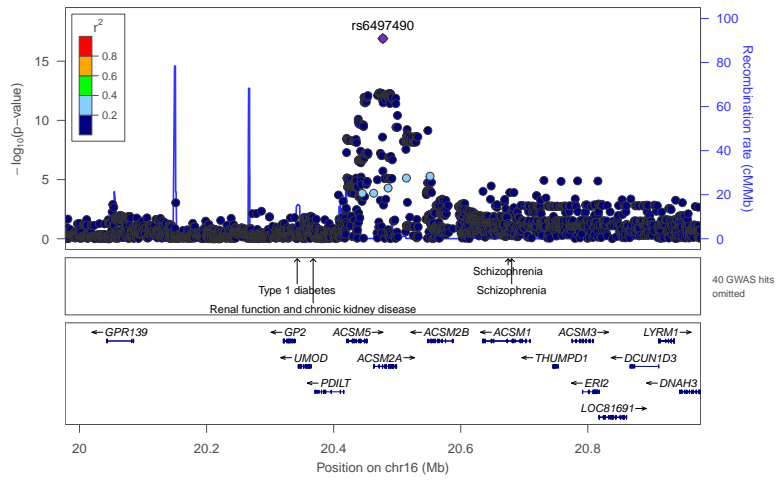

### indoleacetylglutamine

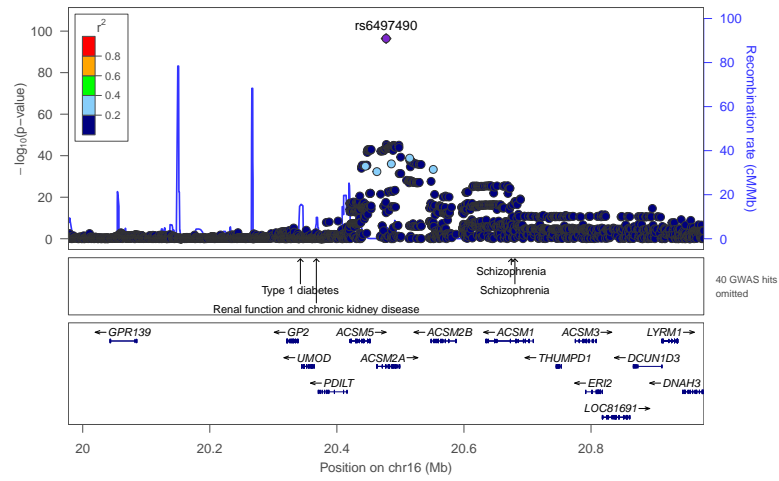

### X - 17328

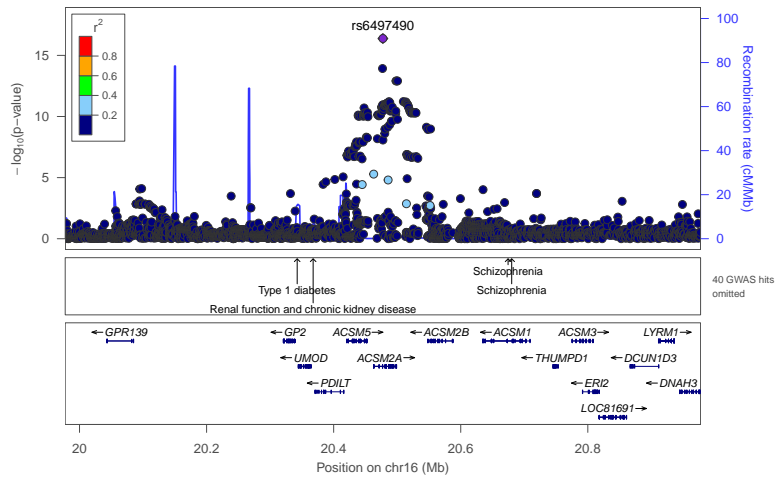

### indoleacetylglycine

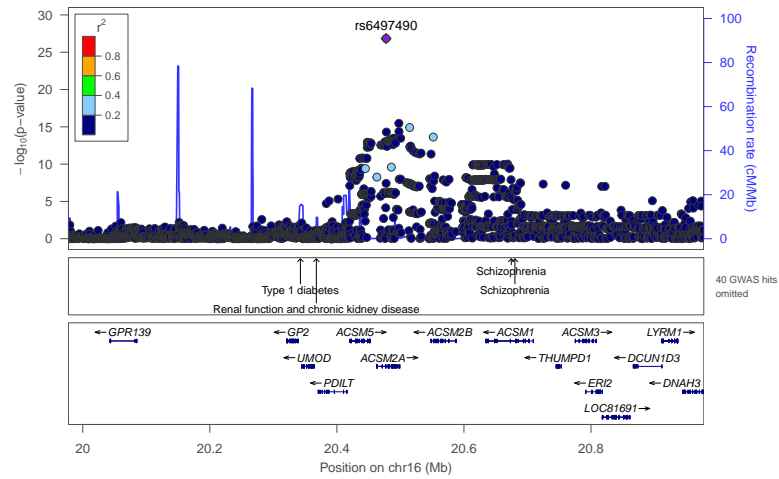

### indoleacetylcarbitine\*

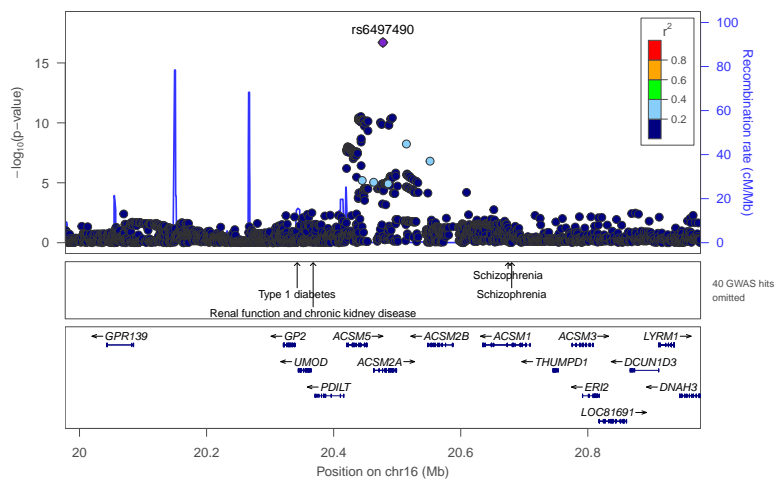

### glucuronide of C10H18O2 (10)\*

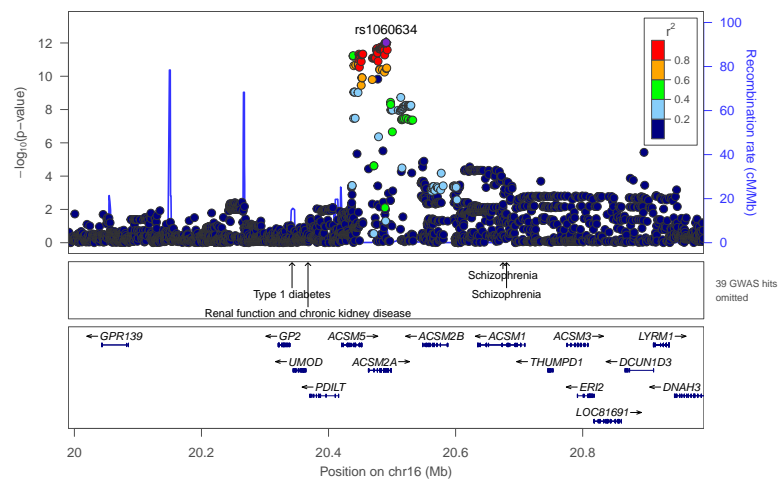

### 4-hydroxyphenylacetylglutamine

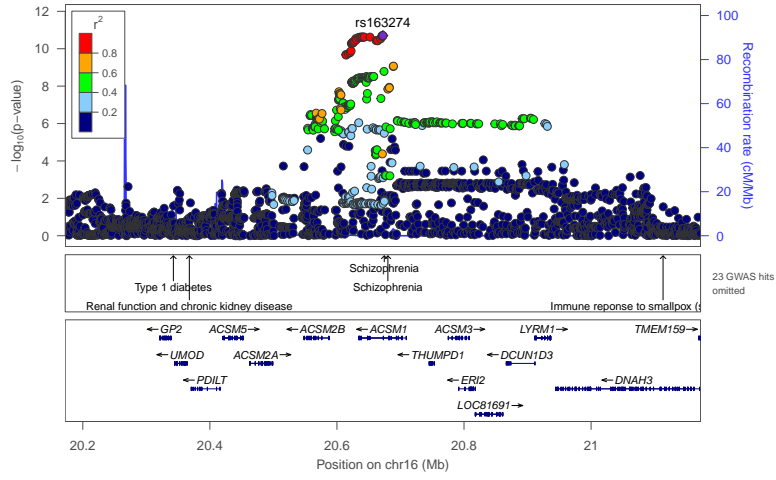

### myo-inositol

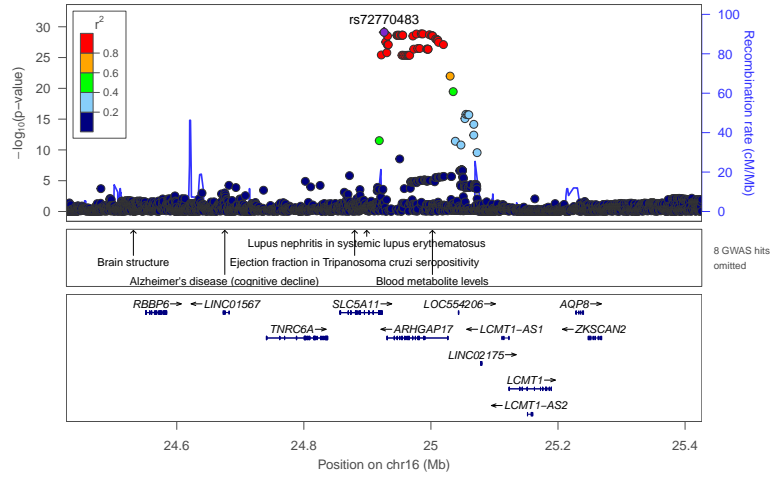

### X - 12714

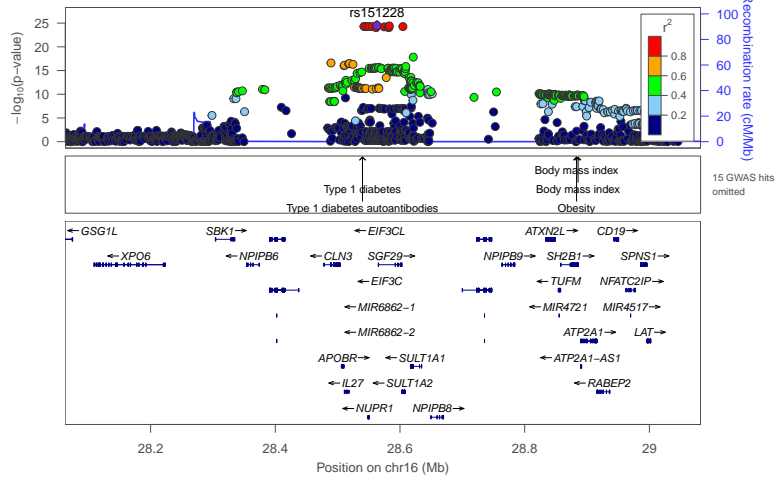

### X - 17674

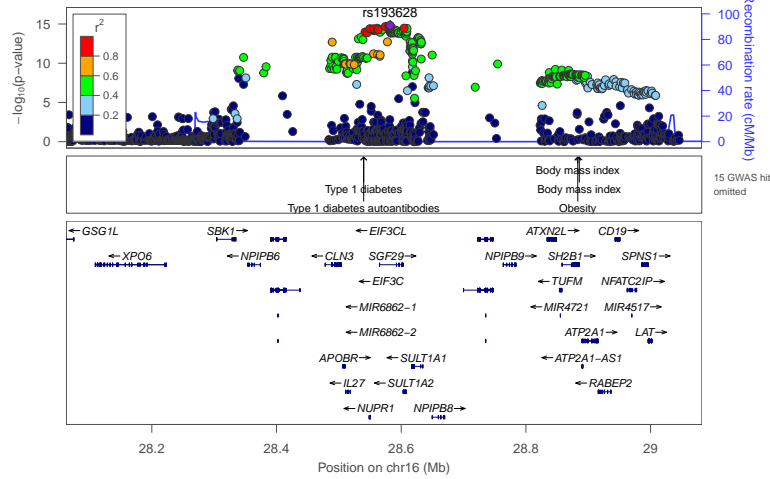

### X - 13846

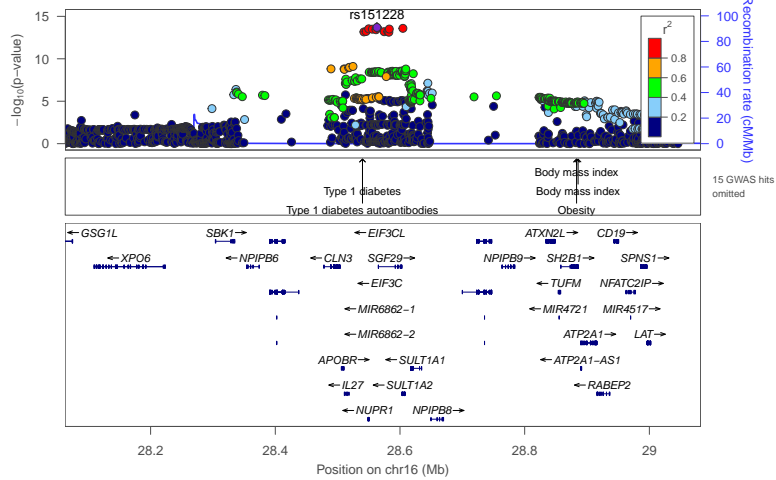

### maltol sulfate

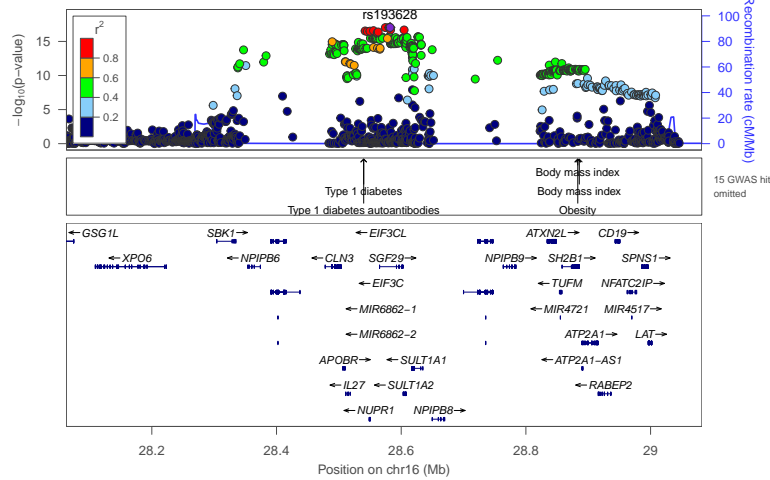

### 3-hydroxyindolin-2-one sulfate

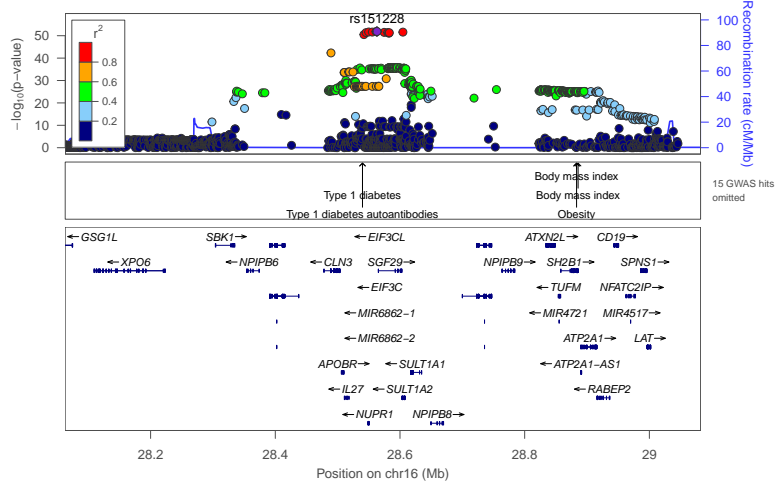

### furaneol sulfate

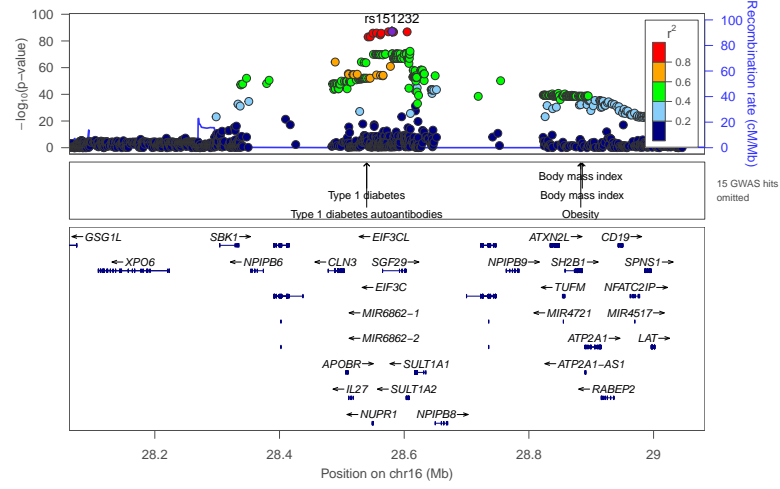

### X - 12707

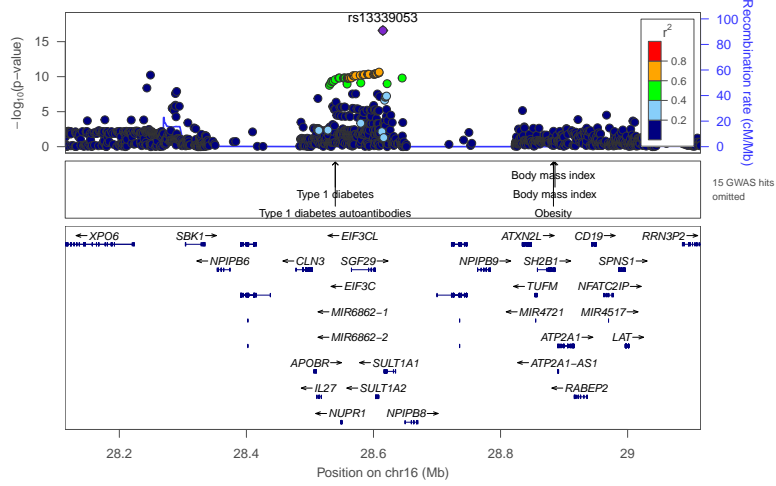

### 5-hydroxyindole sulfate

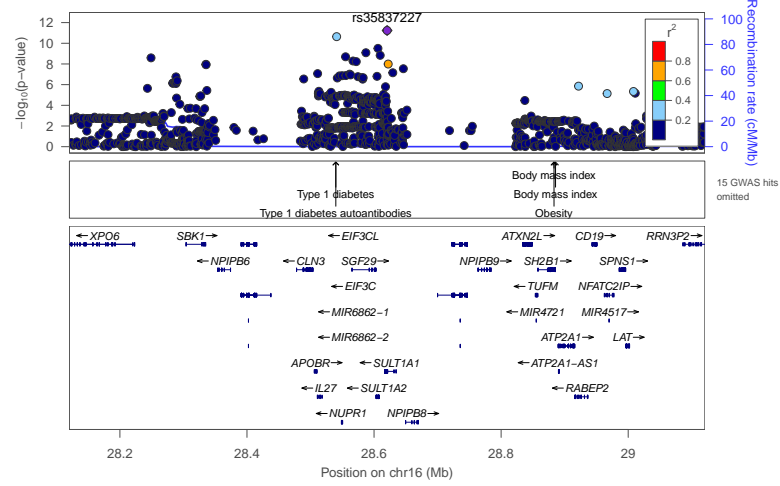

### imidazole lactate

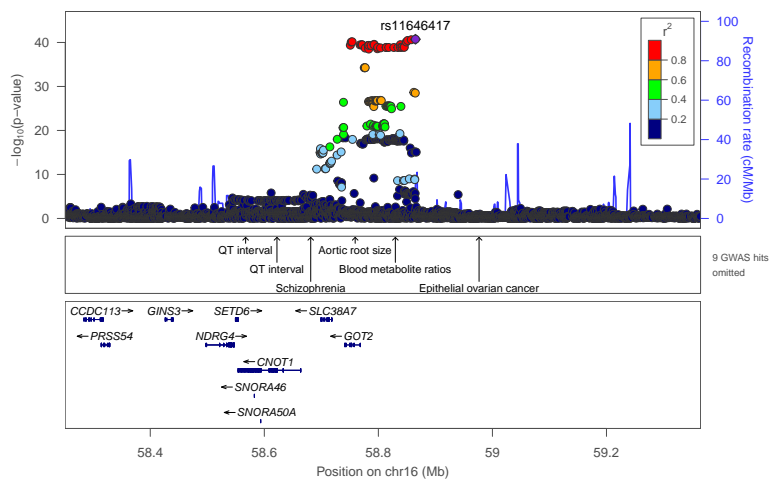

### X - 13684

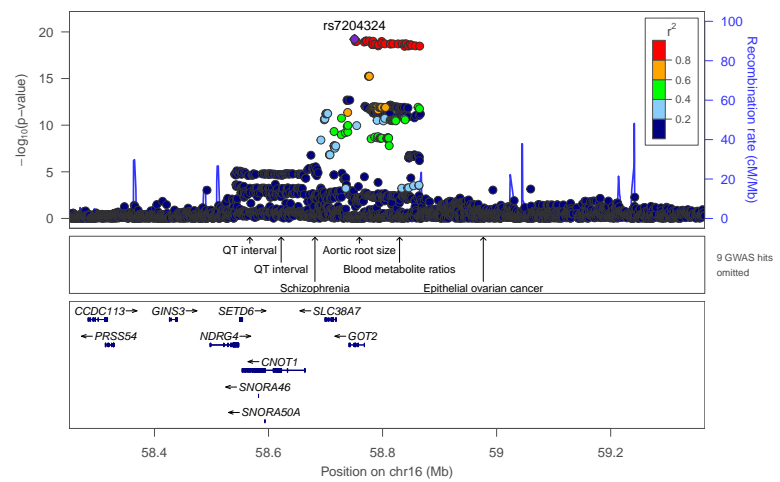

### glutarylcarnitine (C5-DC)

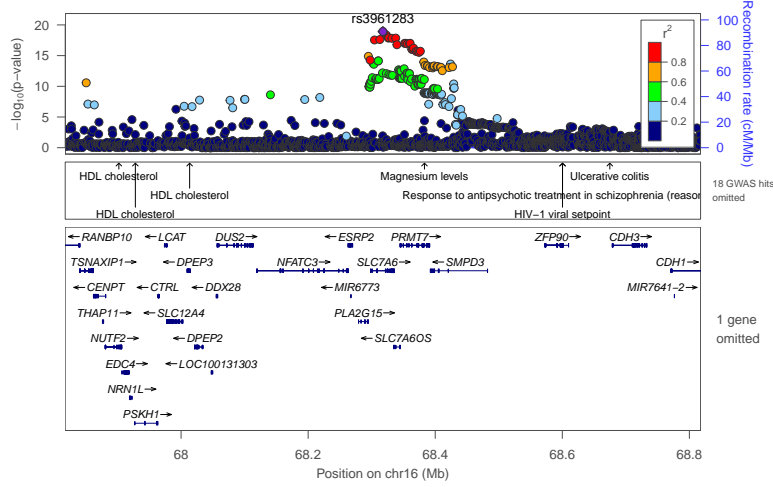

### X - 12100

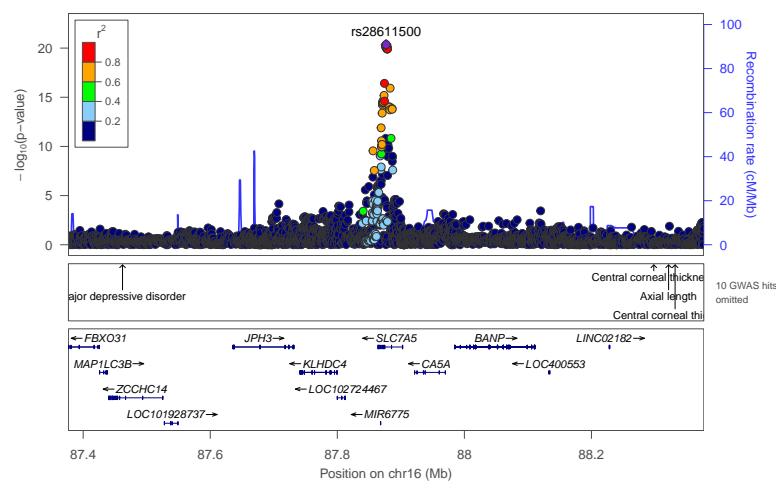

### ethylmalonate

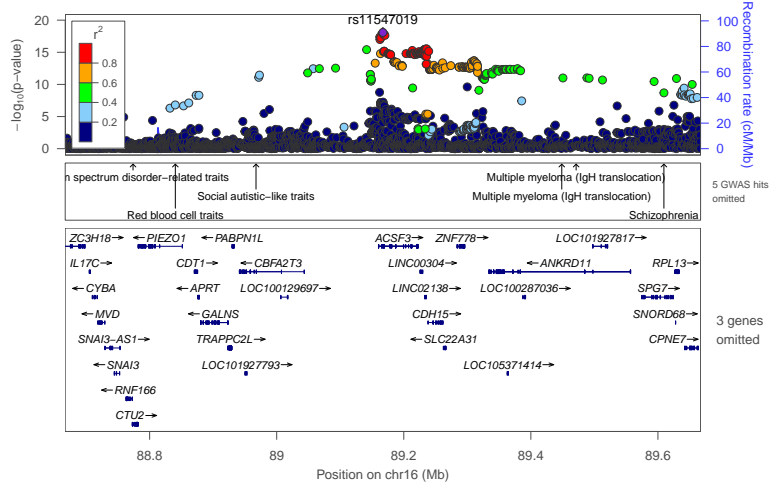

### N-lactoyl tyrosine

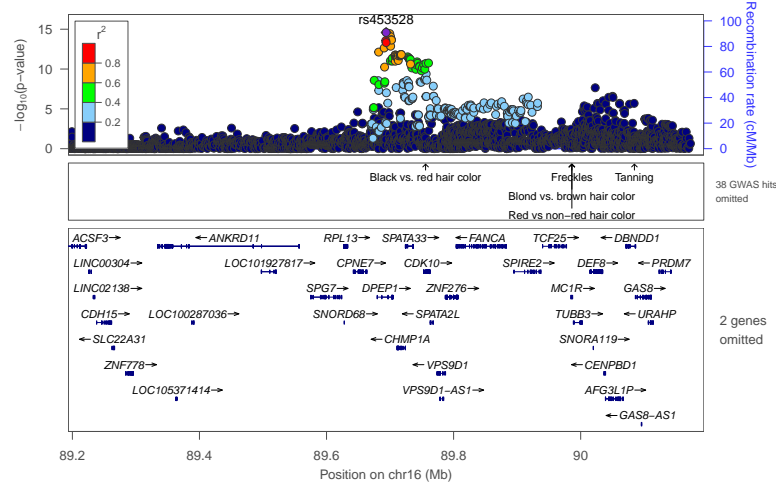

### cysteinylglycine

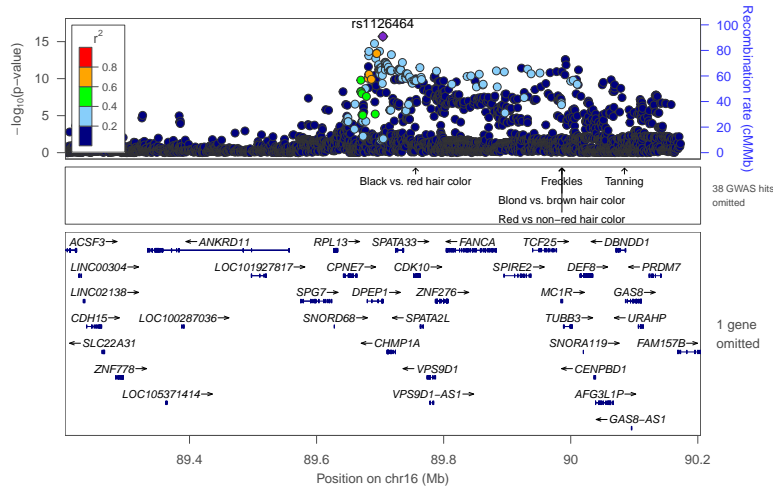

### picolinate

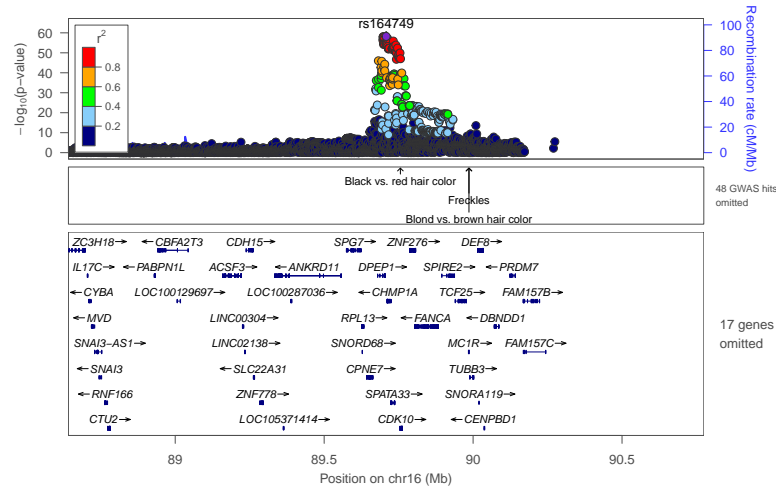

### polyglycine

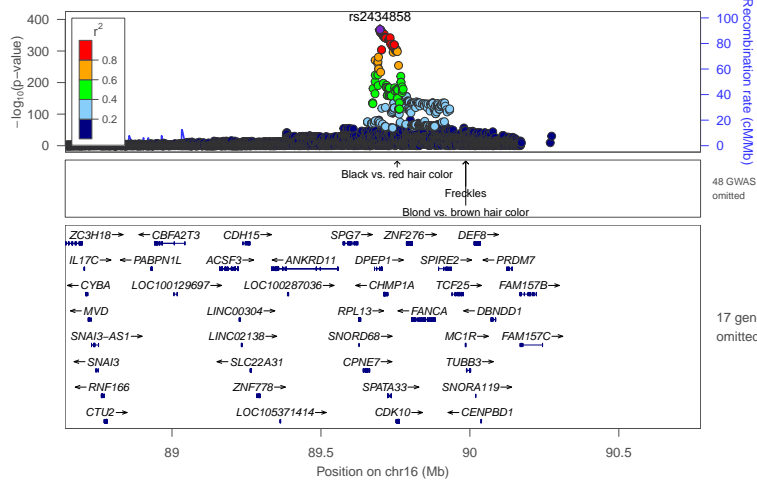

### cysteinylglycine disulfide\*

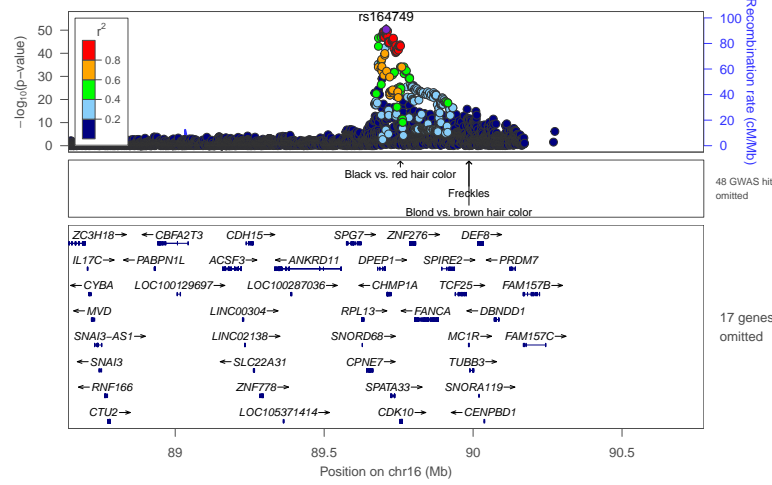

### N-lactoyl leucine

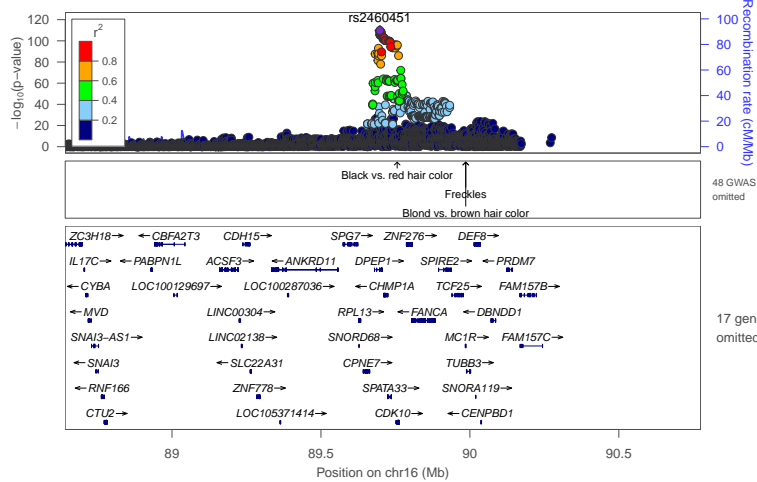

### allo-threonine

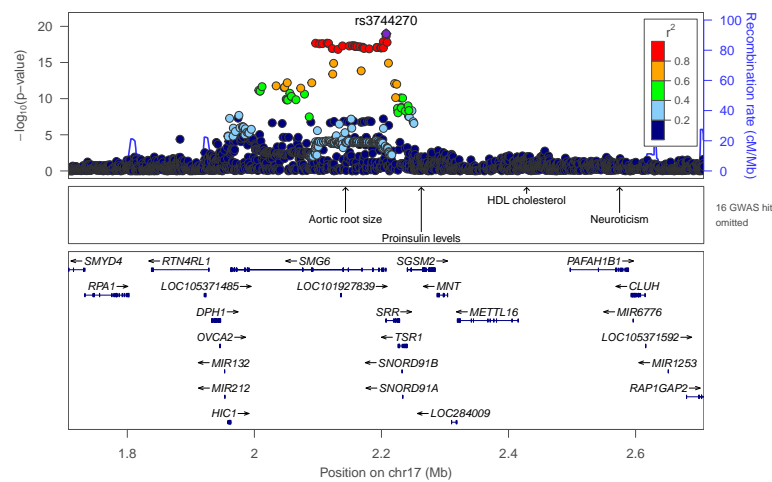

### N6-acetyllysine

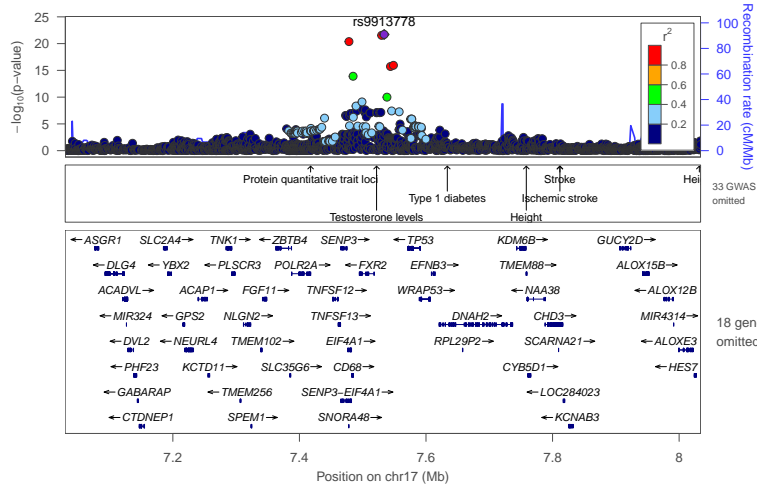

### N2,N6-diacetyllysine

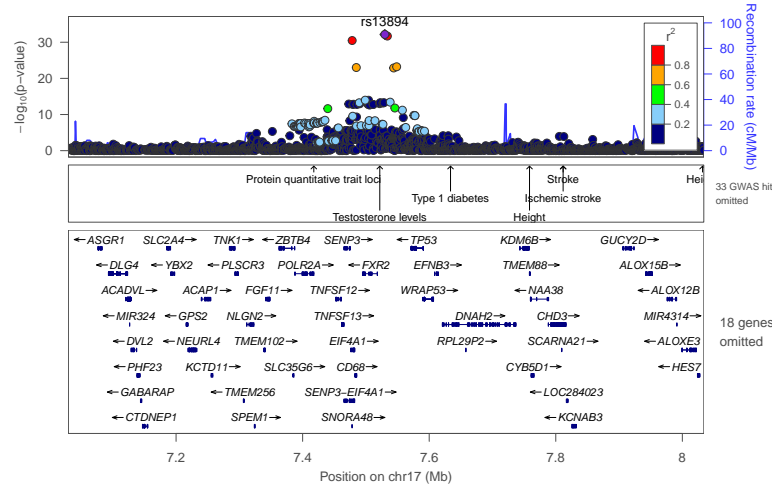

## 2-methylserine

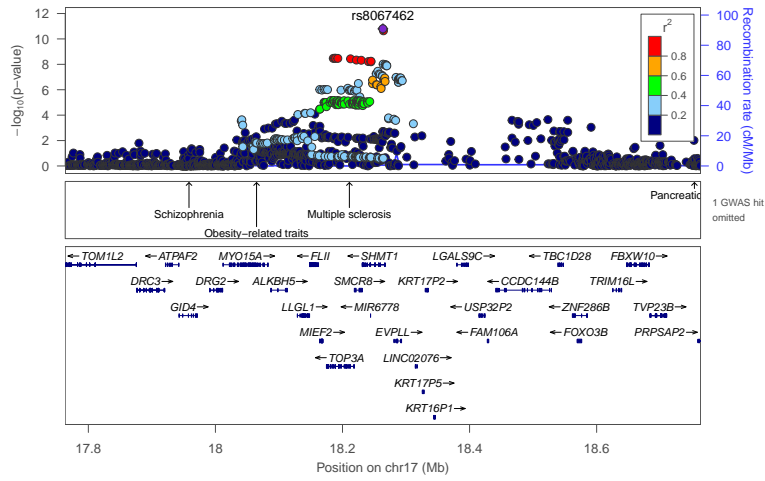

## glycochenodeoxycholate 3-sulfate

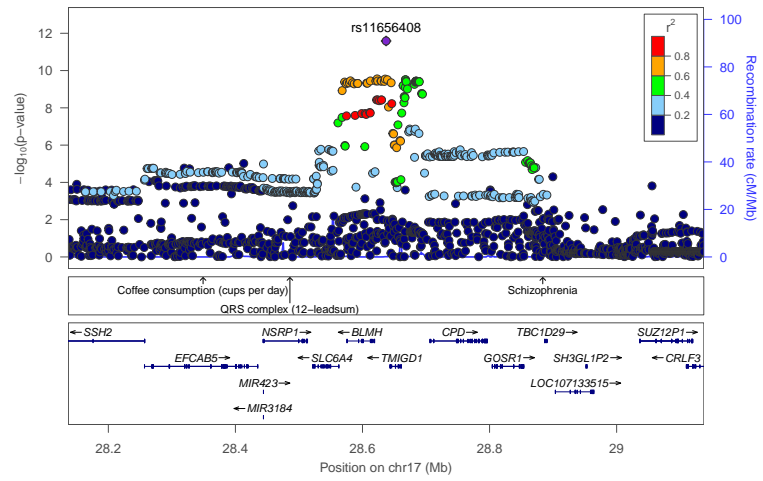

## tyrosine

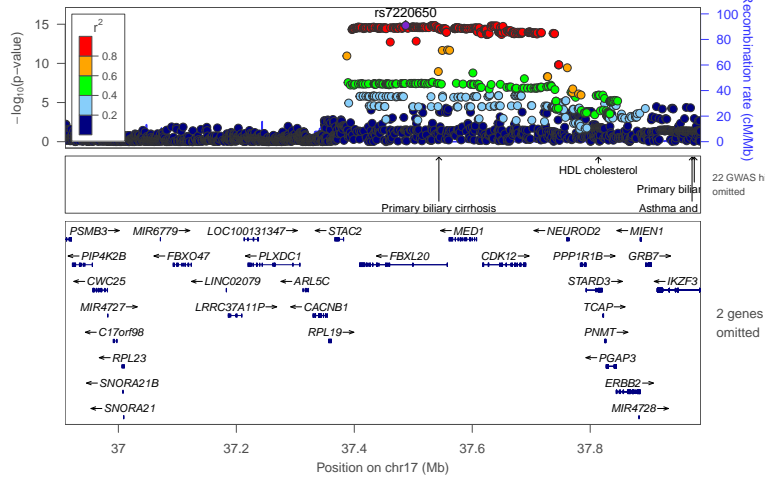

## tryptophan

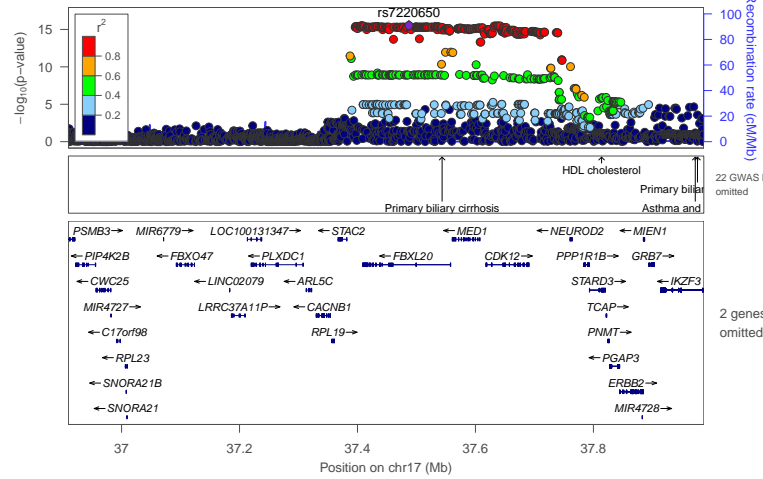

## histidine

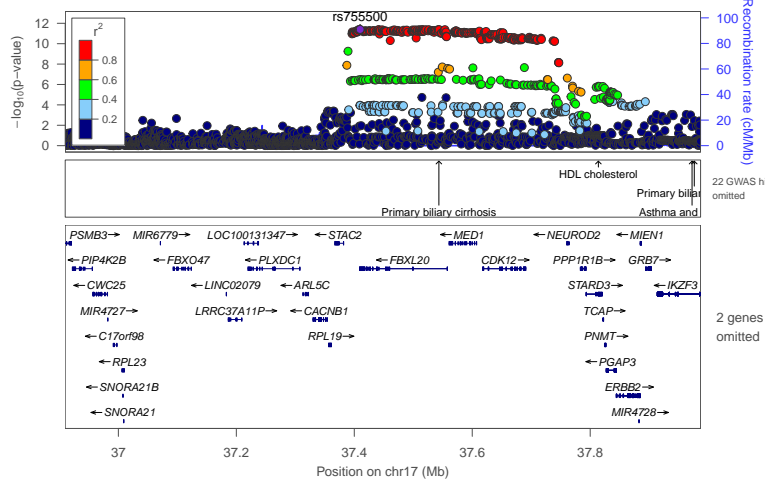

## orotidine

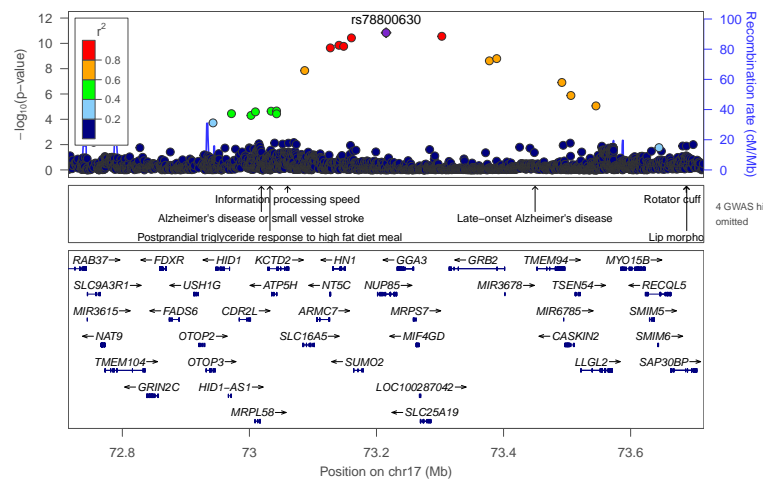



pimelate (C7-DC)

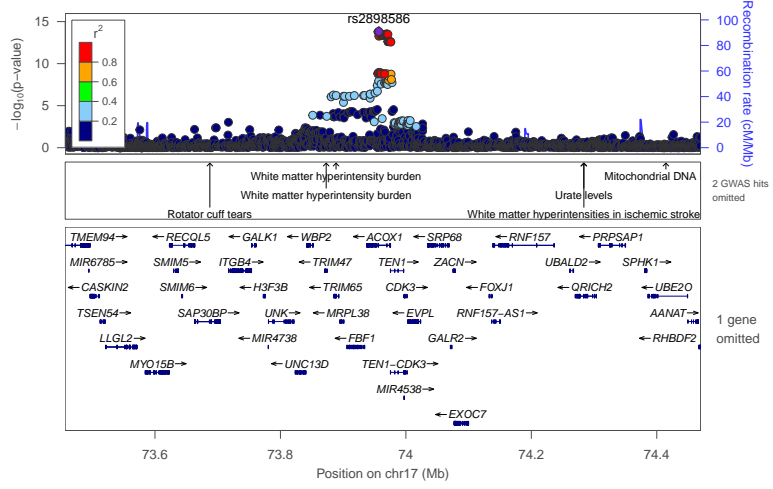

nonenedioate (C9:1-DC)\*

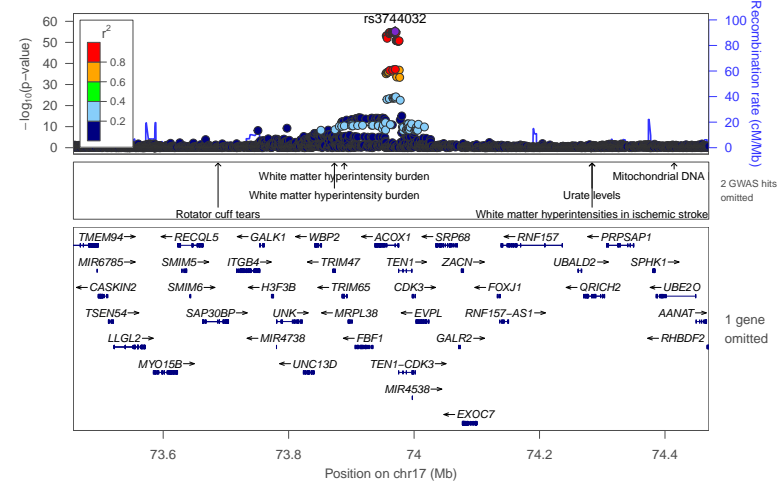

N-formylanthranilic acid

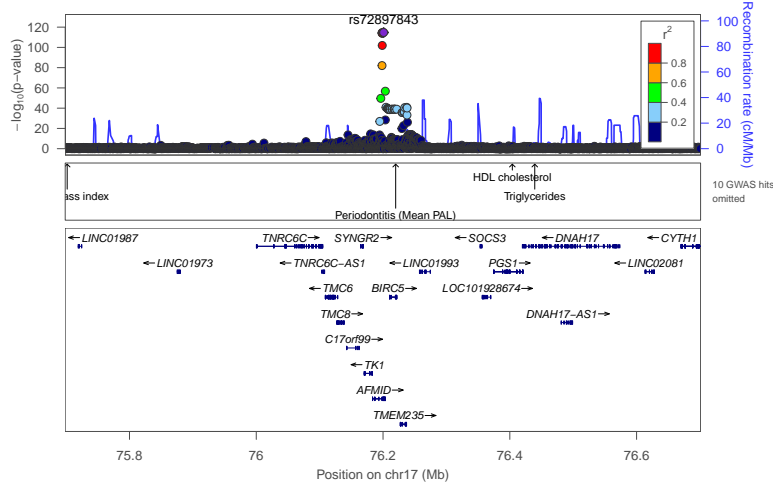

2-acetamidophenol sulfate

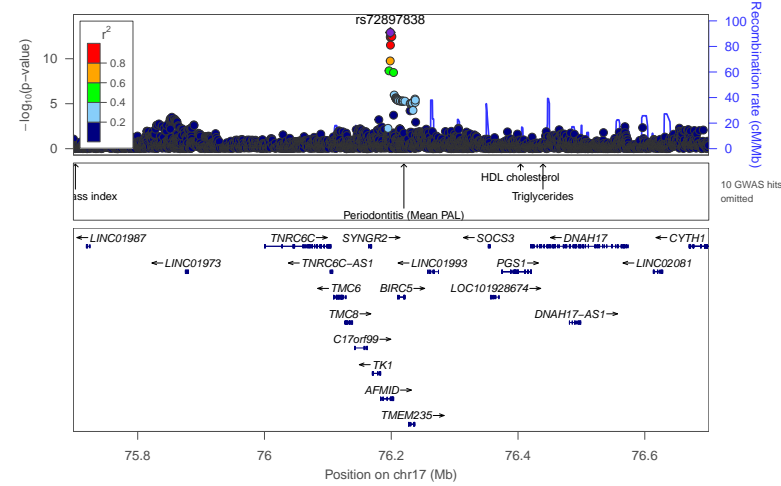

X - 24455

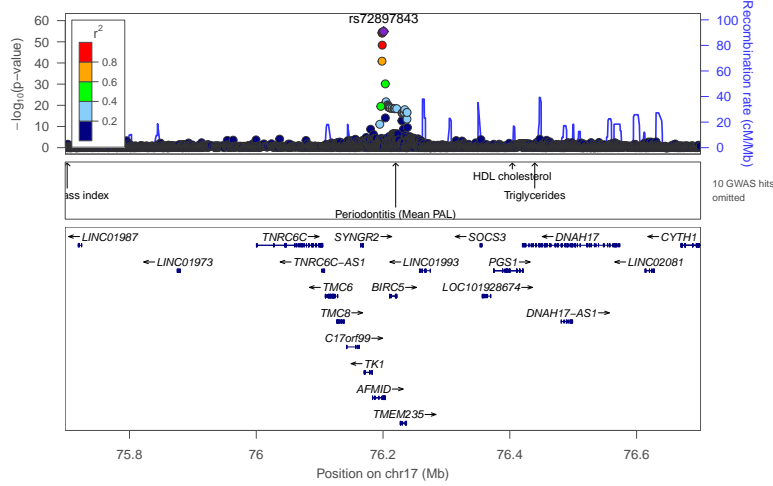

anthranilate

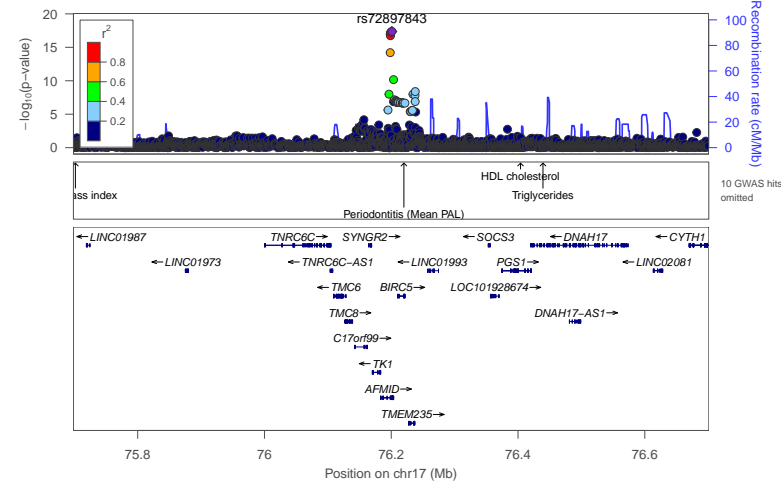

### X - 24334

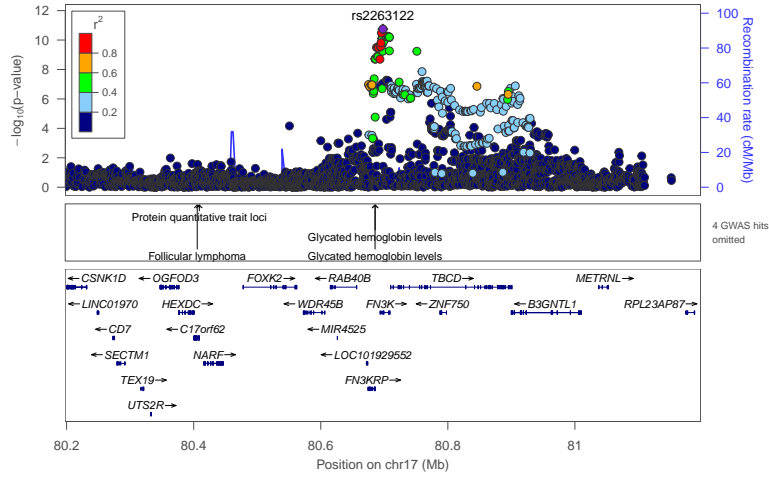

### ribonate

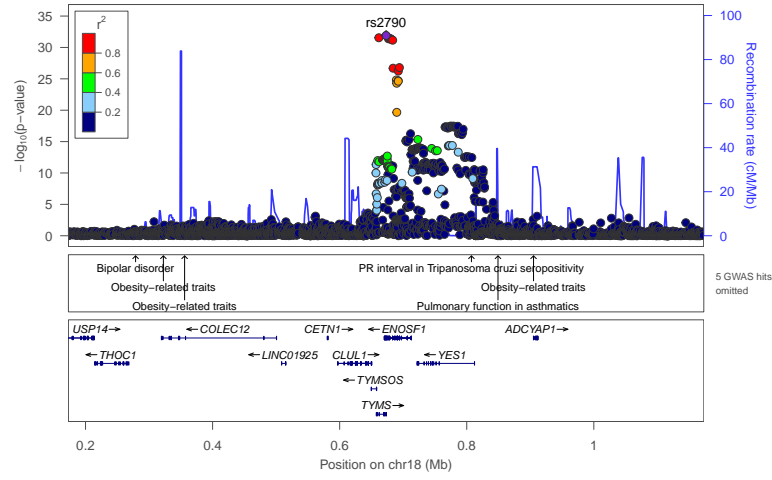

### carosine

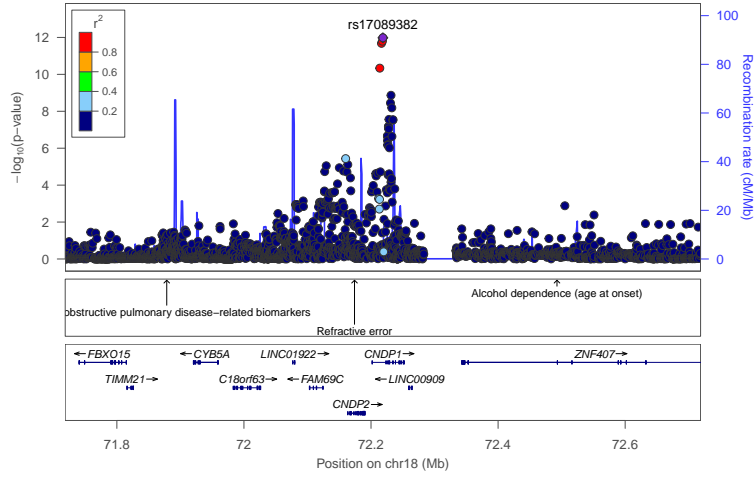

### 2'-fucosyllactose

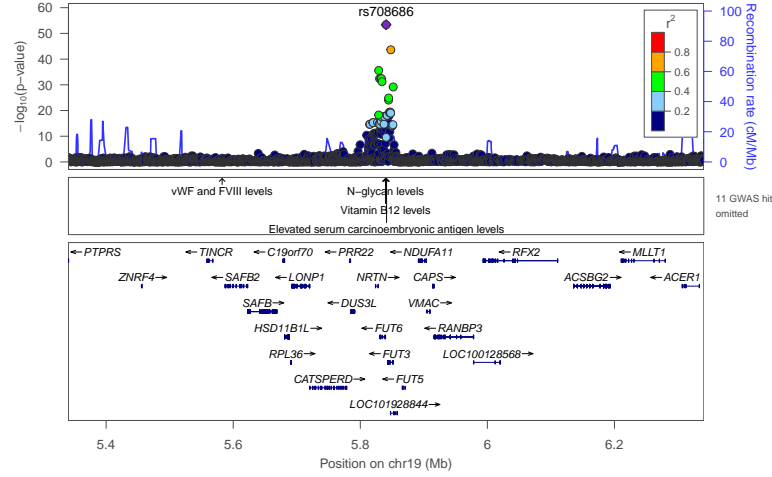

### X - 24834

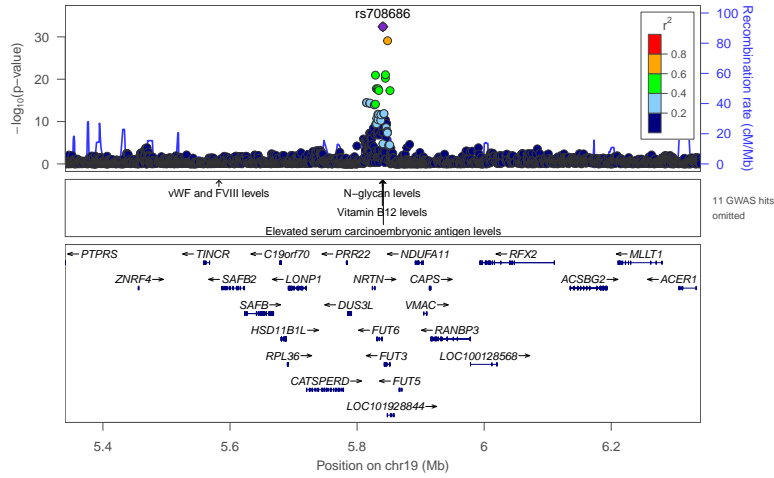

### glutarylcarnitine (C5-DC)

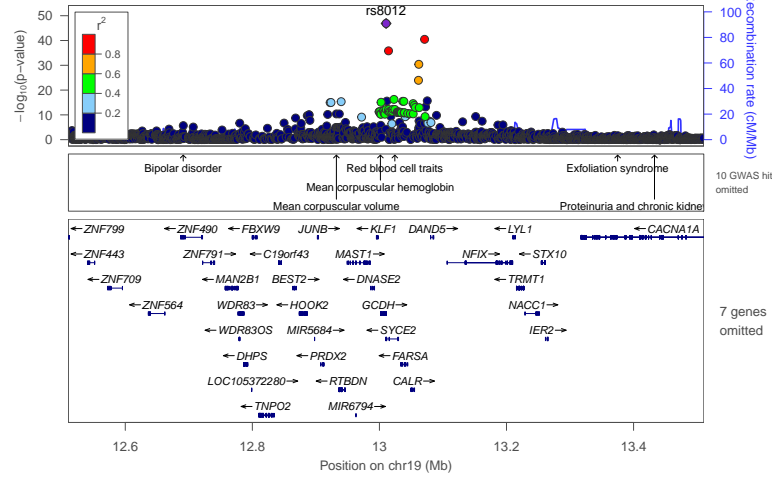

### X – 12411

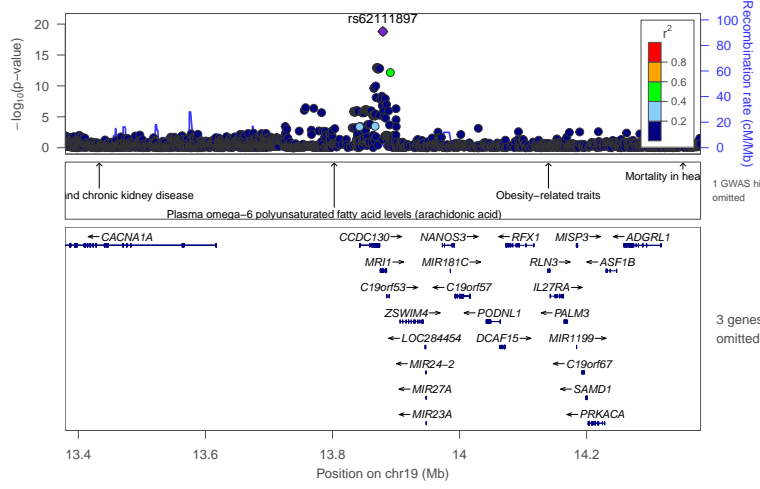

### 3,5-dihydroxybenzoic acid

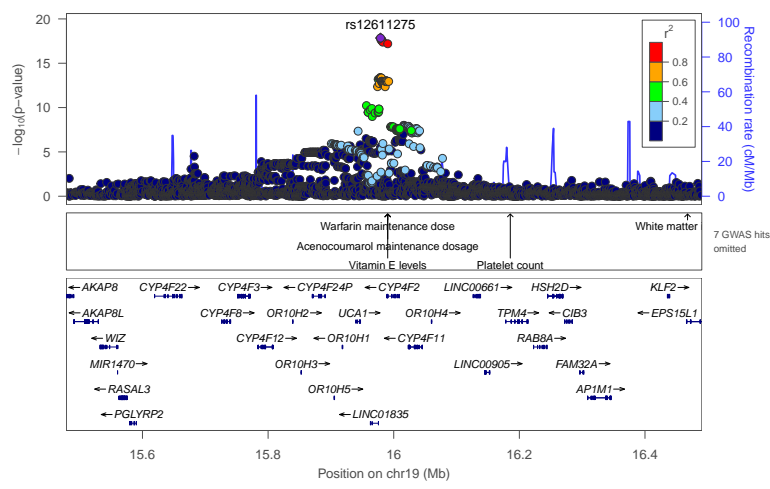

### alpha-CEHC glucuronide\*

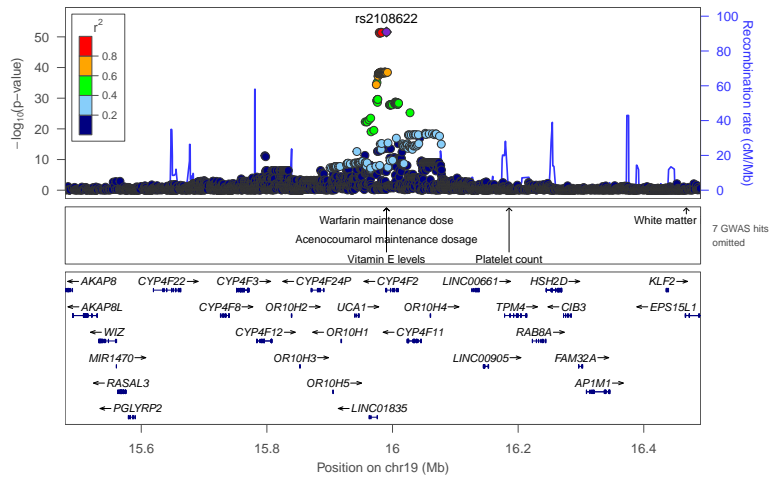

### gamma-CEHC glucuronide\*

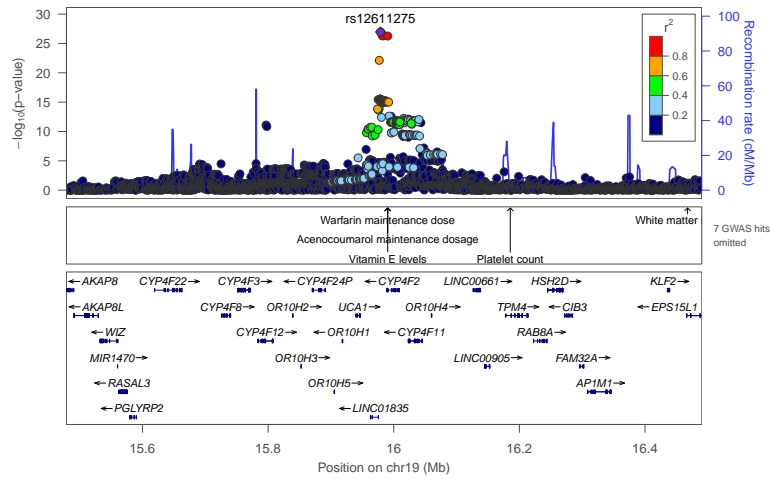

### alpha-CEHC sulfate

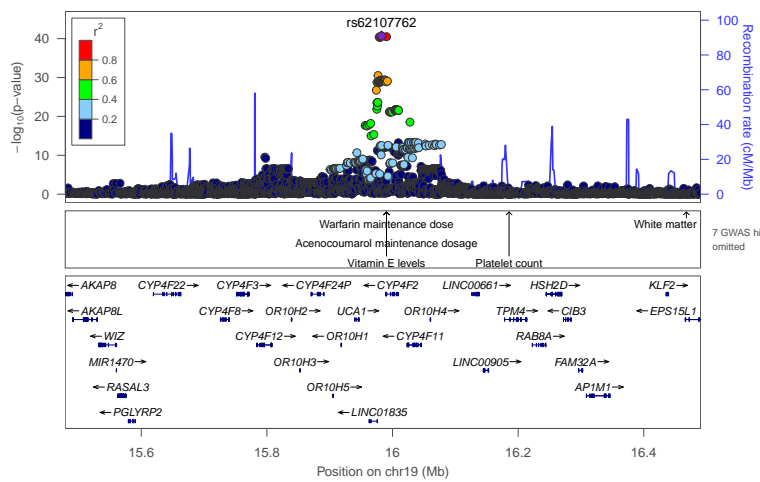

### X – 24359

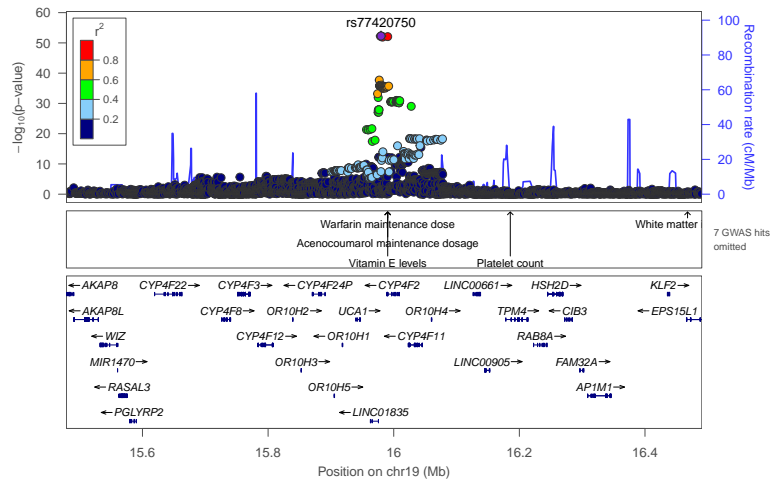

### alpha-CEHC glycine\*

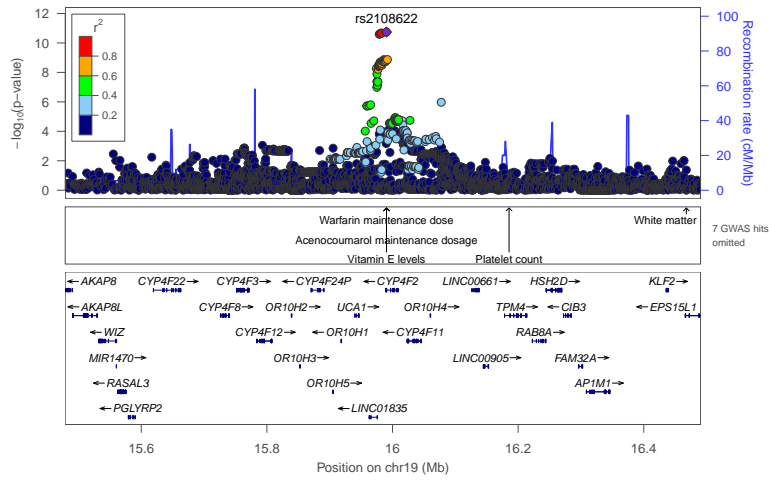

### alpha-CEHC taurine\*

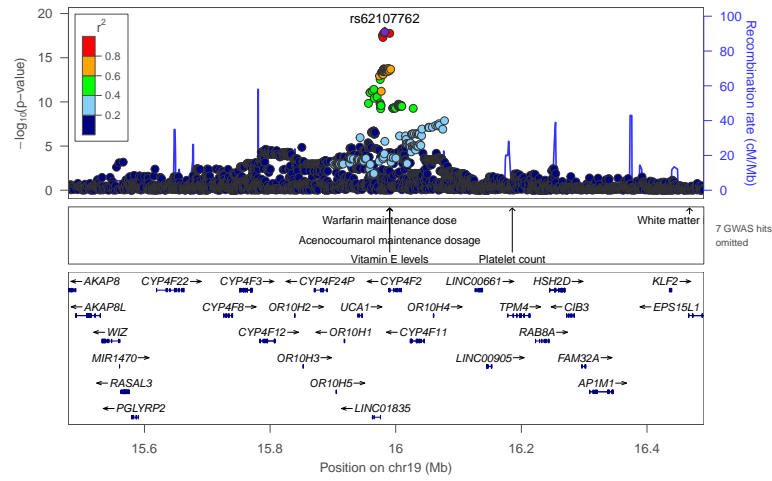

### X - 24807

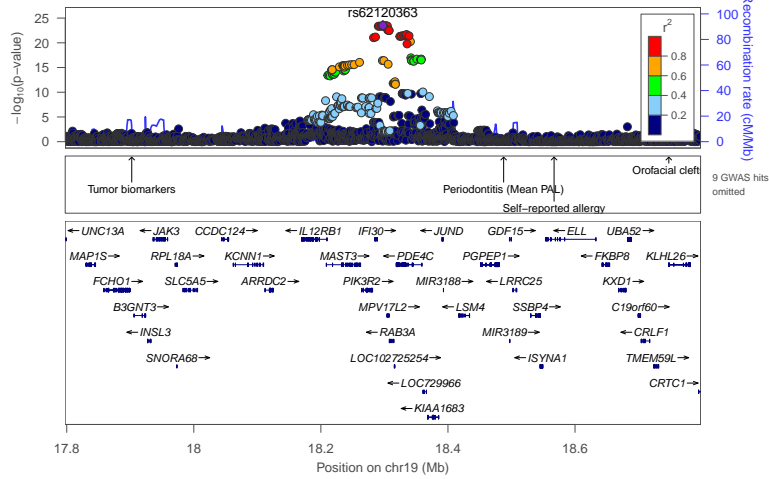

### carosine

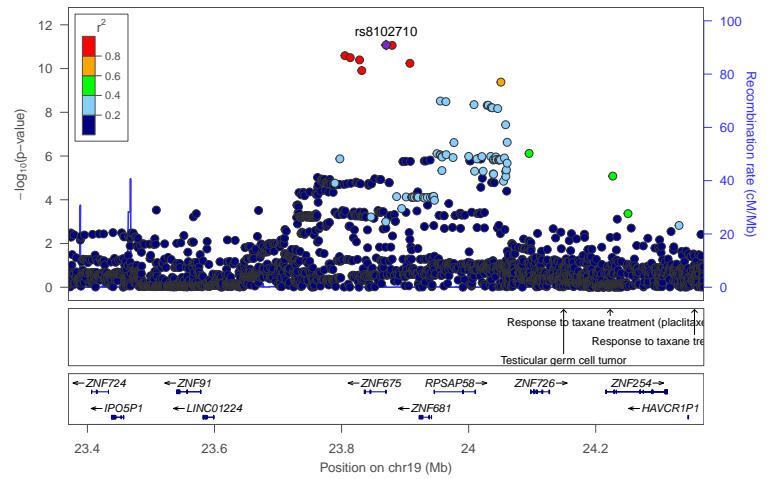

### vanillic acid glycine

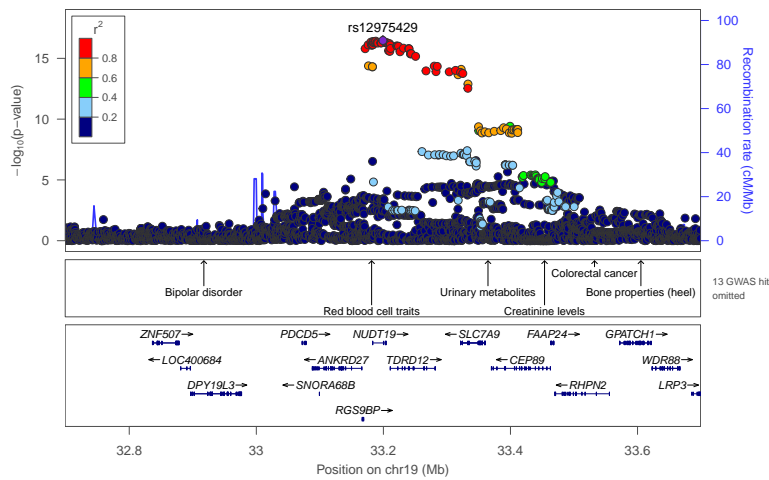

### lysine

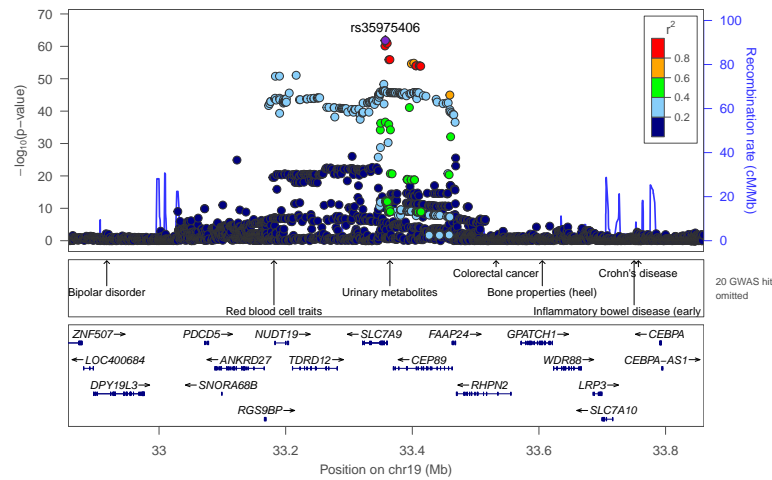

### ornithine

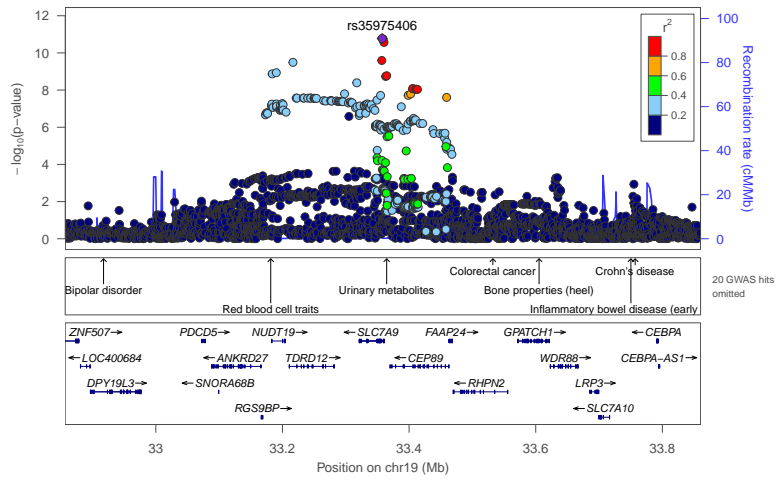

### 5-hydroxylysine

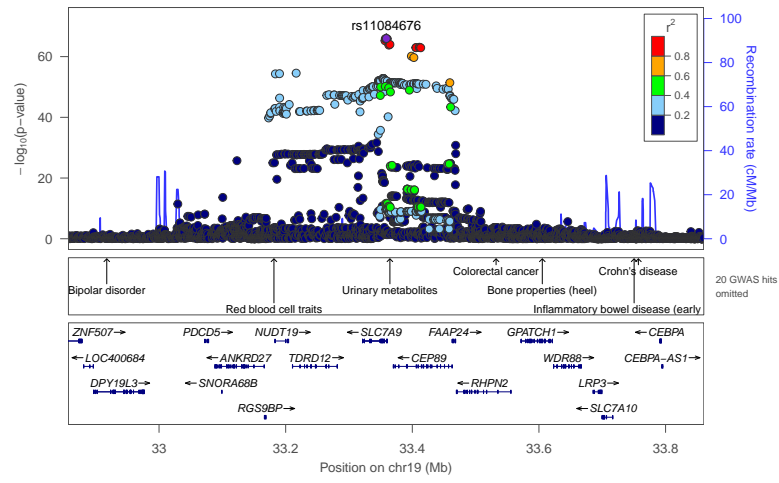

### homoarginine

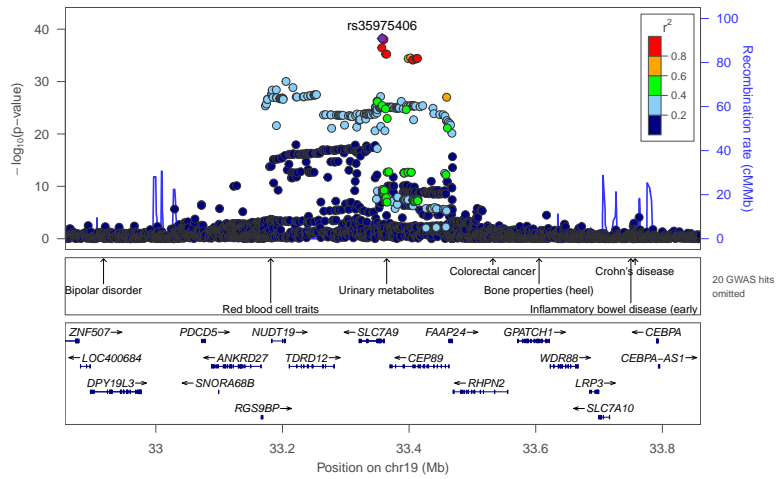

### N6-acetyllysine

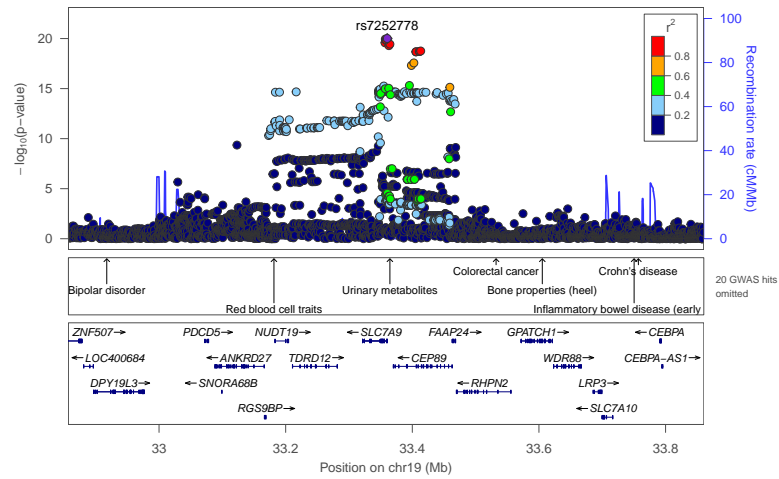

### X - 24736

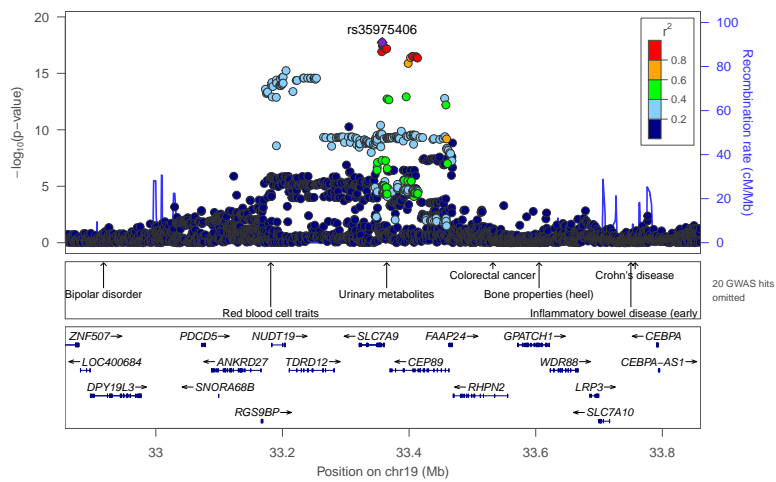

### cystine

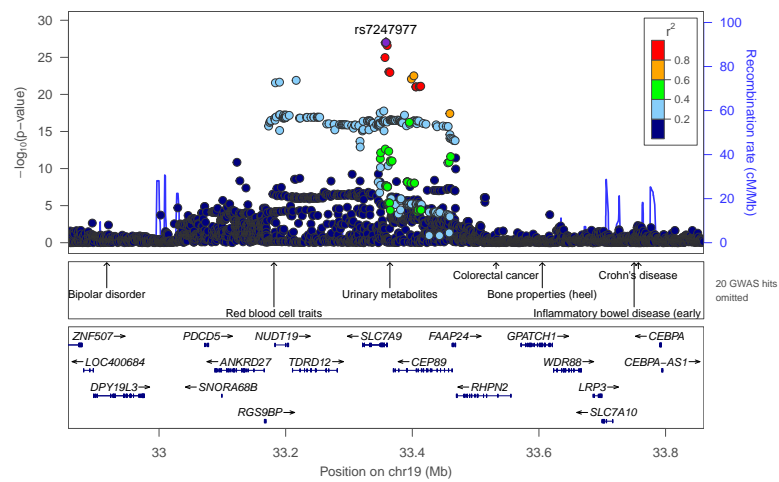

### N-acetylhomocitrulline

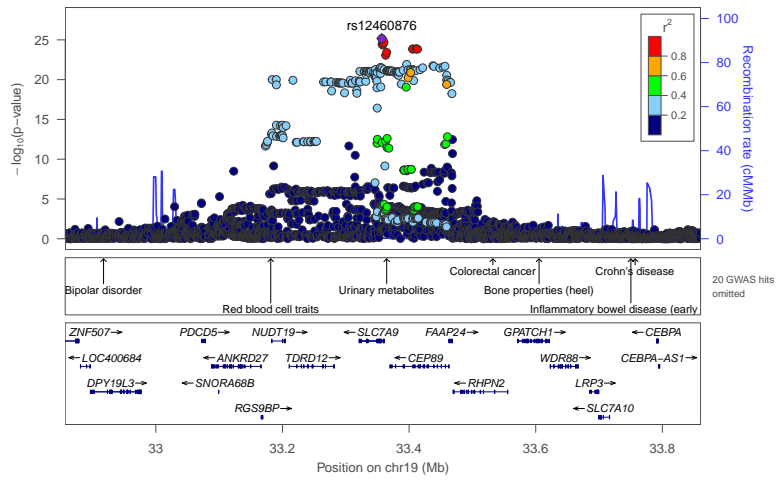

### homocitrulline

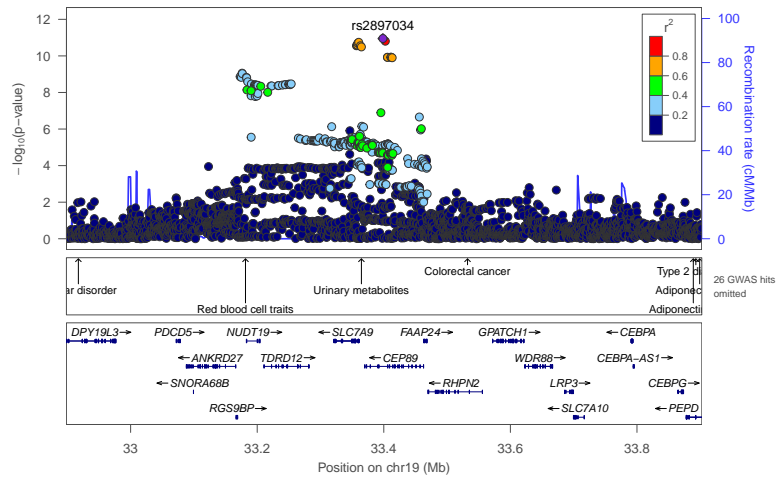

### N6-methyllysine

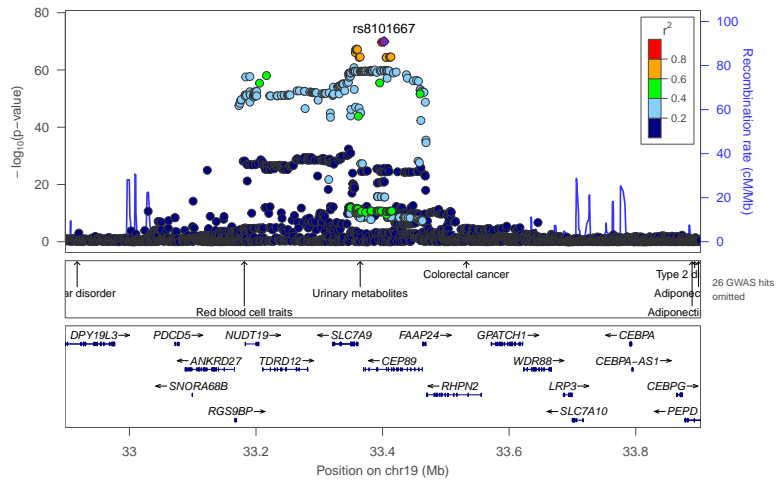

### X - 12126

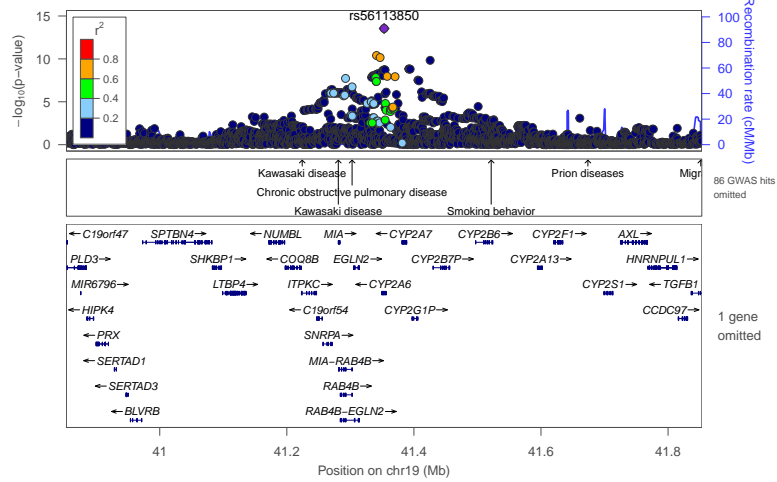

### X - 21831

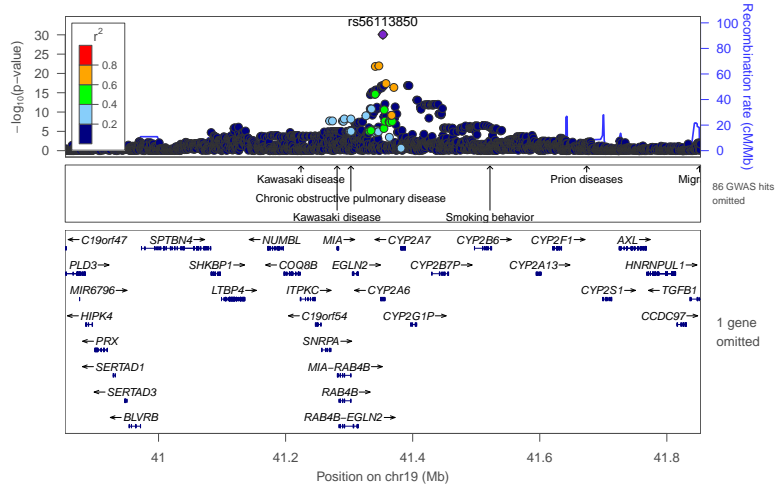

### X - 18935

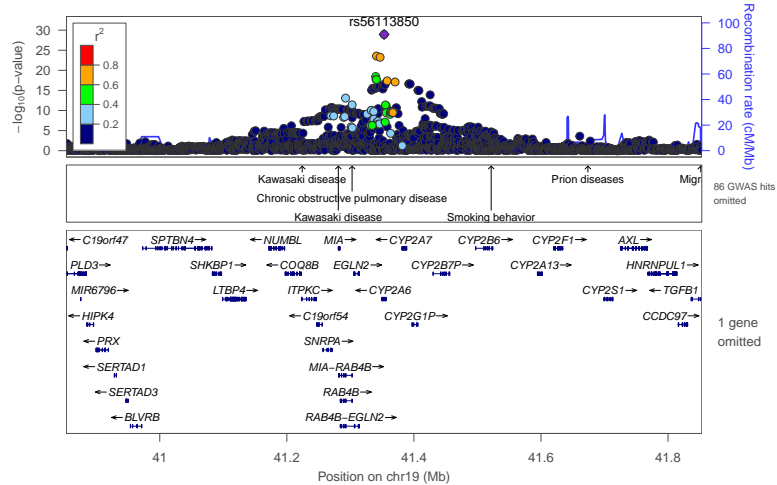



### epiandrosterone glucuronide

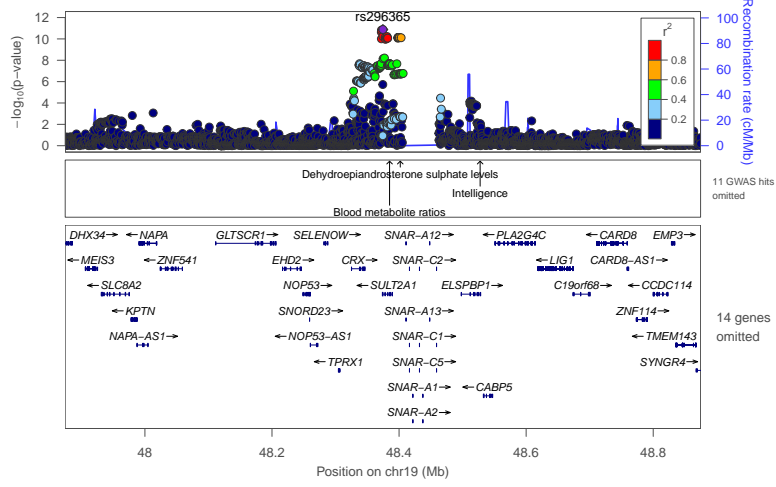

### pregnenediol disulfate (C21H34O8S2)\*

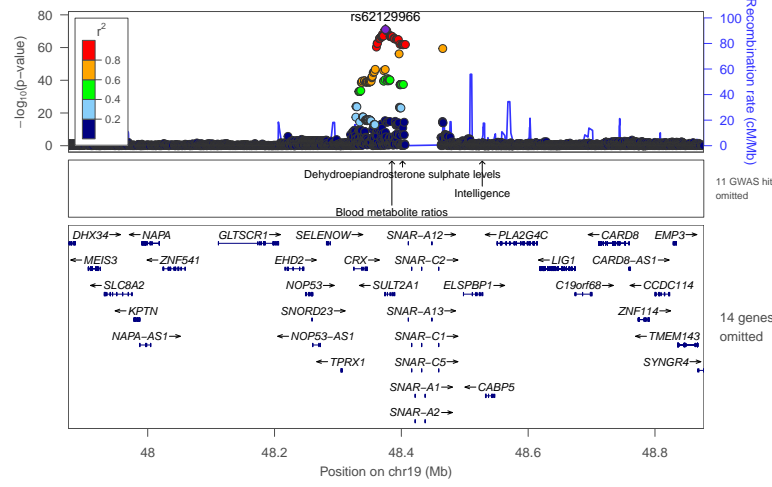

### androstenediol (3beta,17beta) disulfate (1)

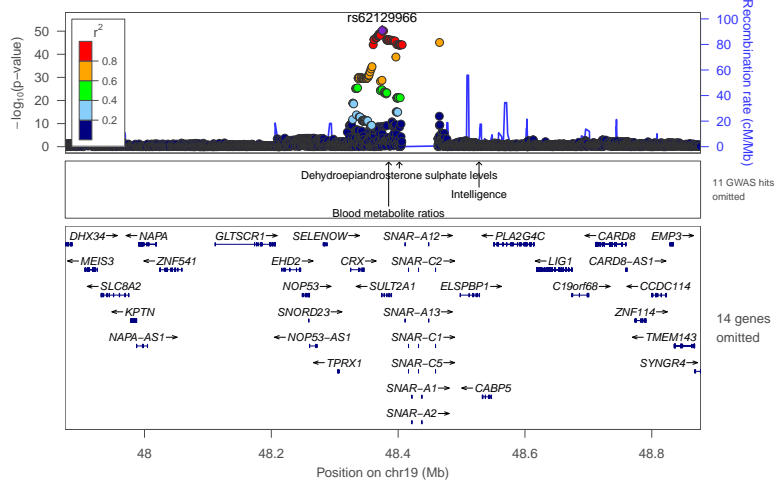

### 11-ketoetiocholanolone sulfate

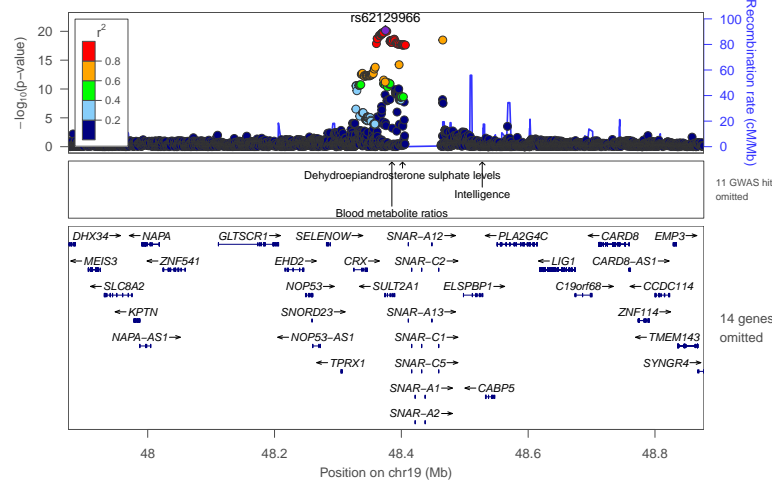

### X - 21470

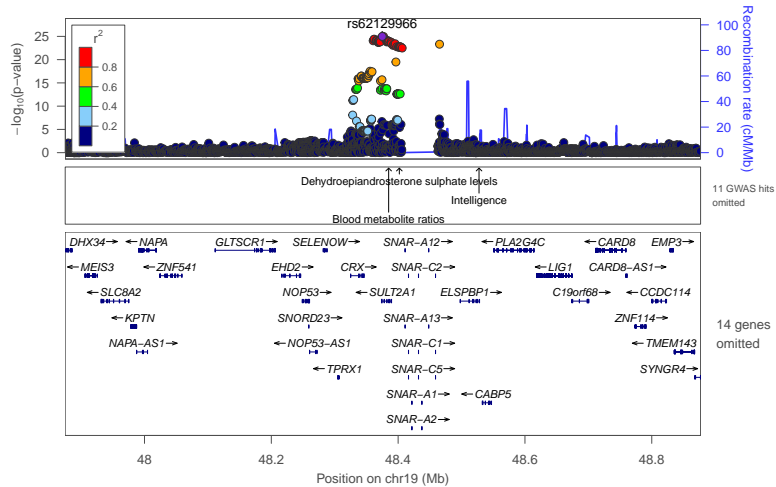

### X - 21851

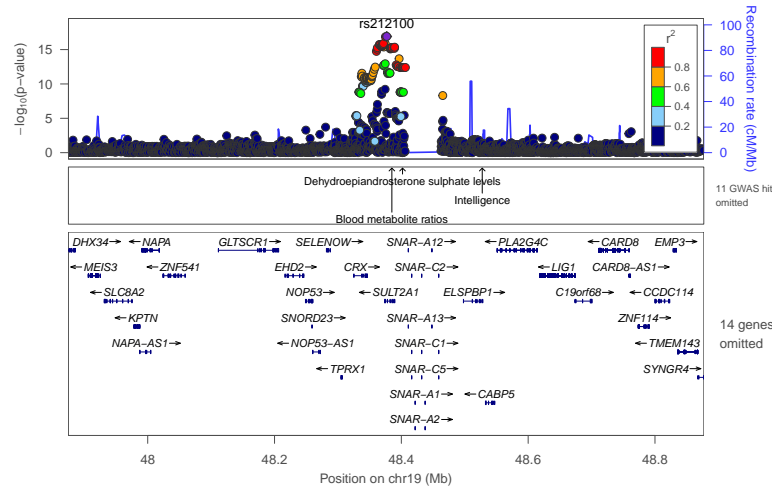

X - 24495

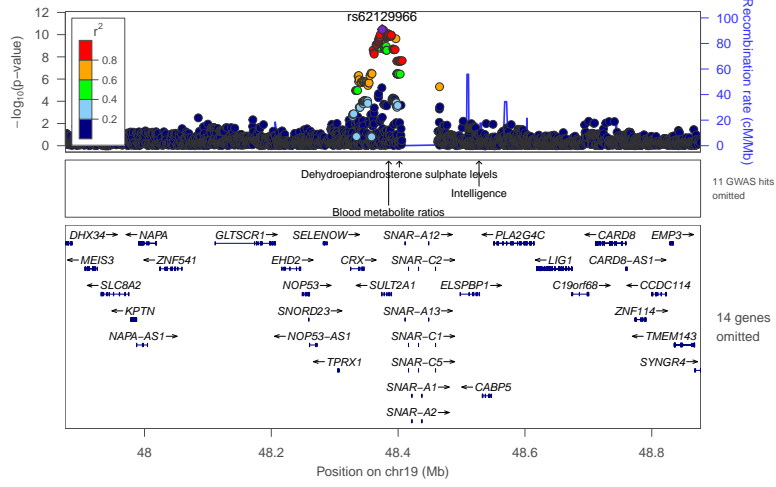

glycochenodeoxycholate 3-sulfate

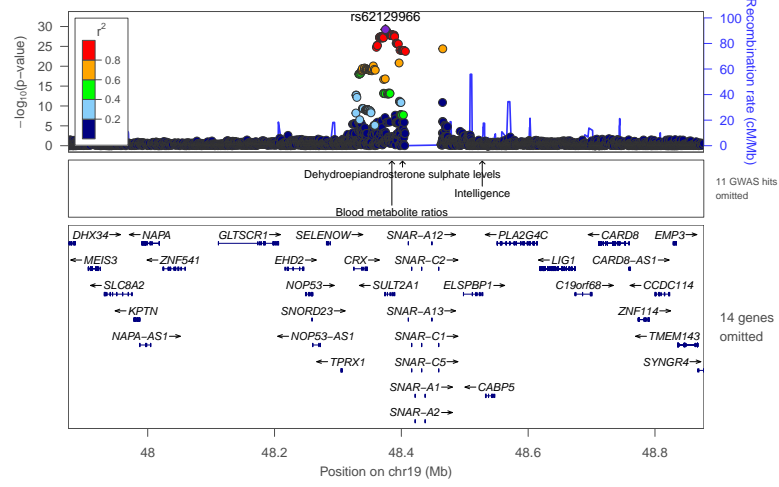

glycodeoxycholate 3-sulfate

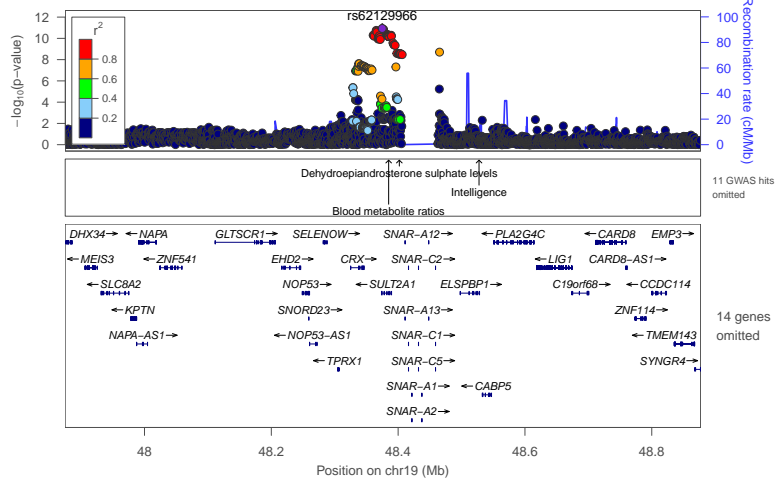

androsterone glucuronide

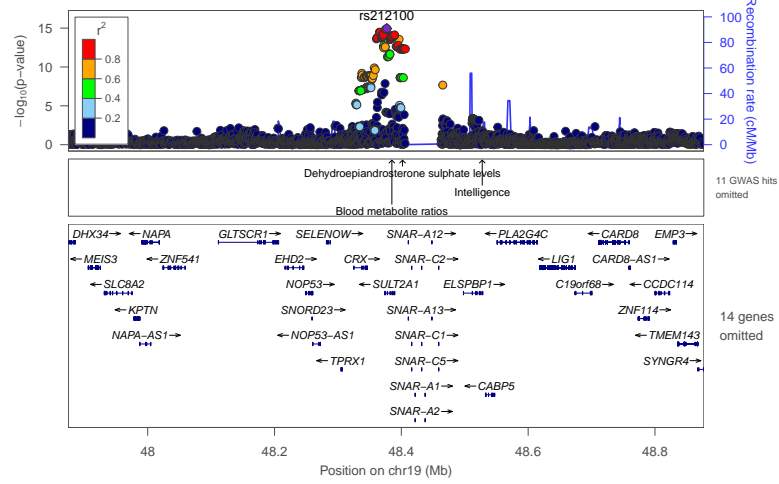

pregnenetriol disulfate\*

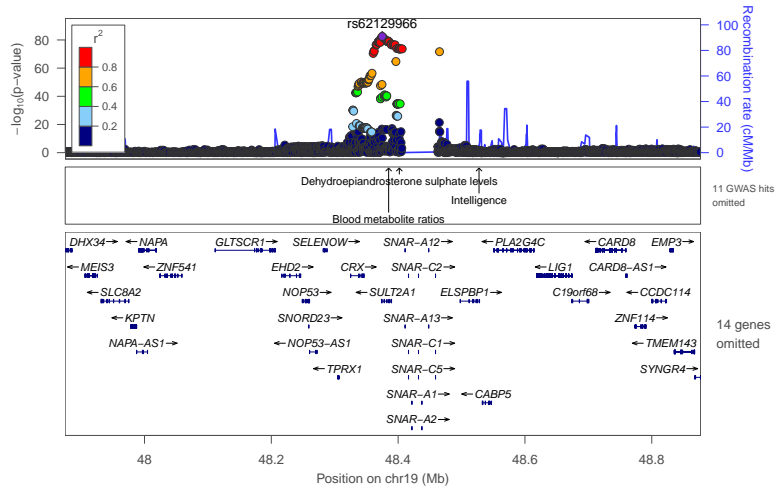

X - 24546

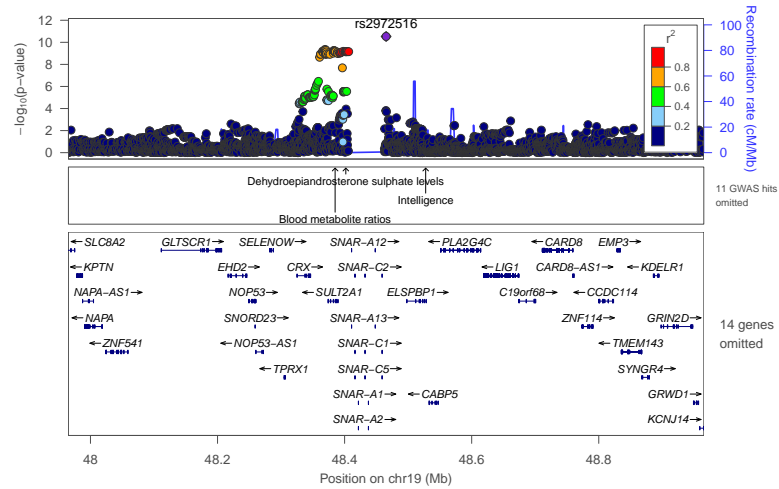

### 1,6-anhydroglucose

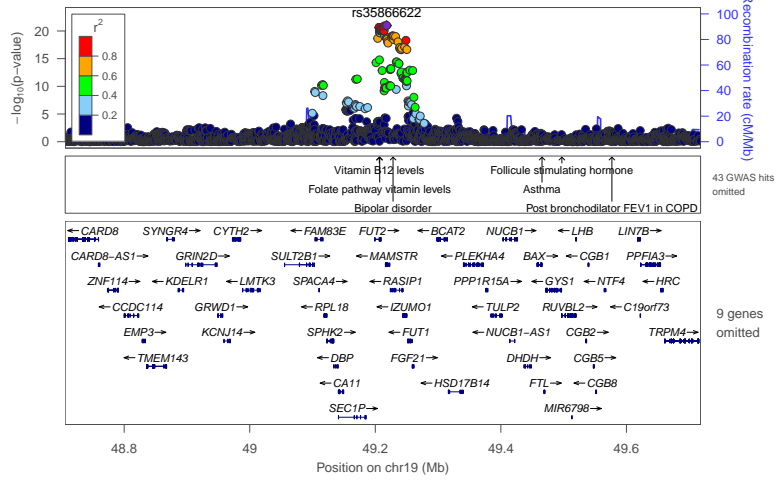

### galactosylglycerol

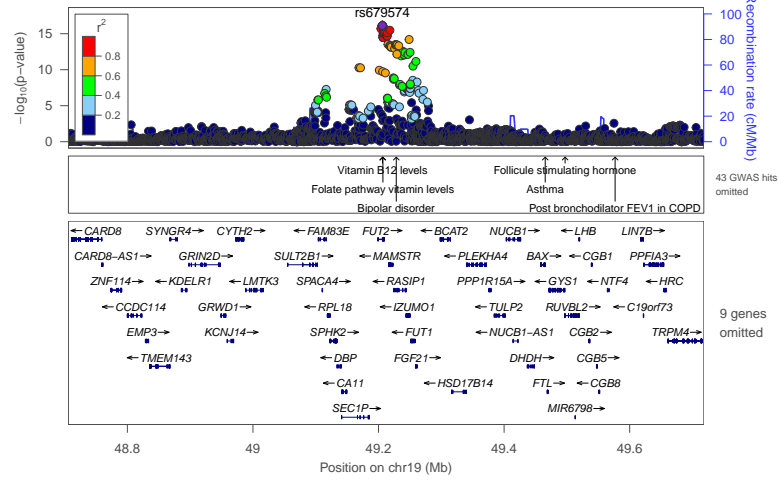

### fucose

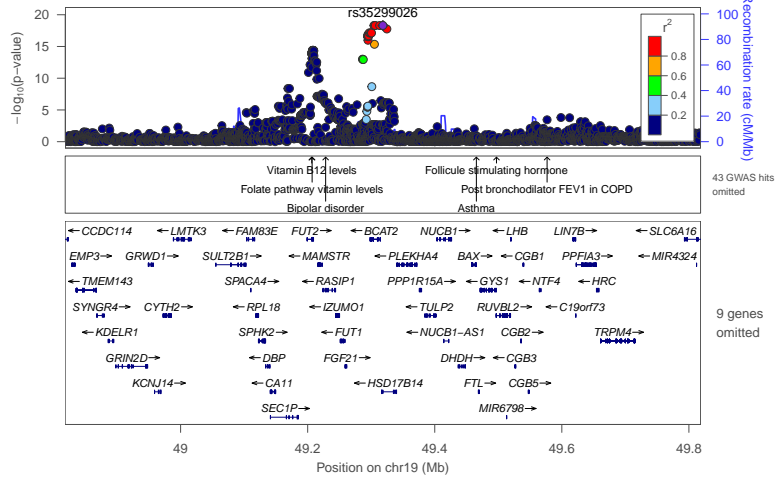

### methylsuccinylcarnitine

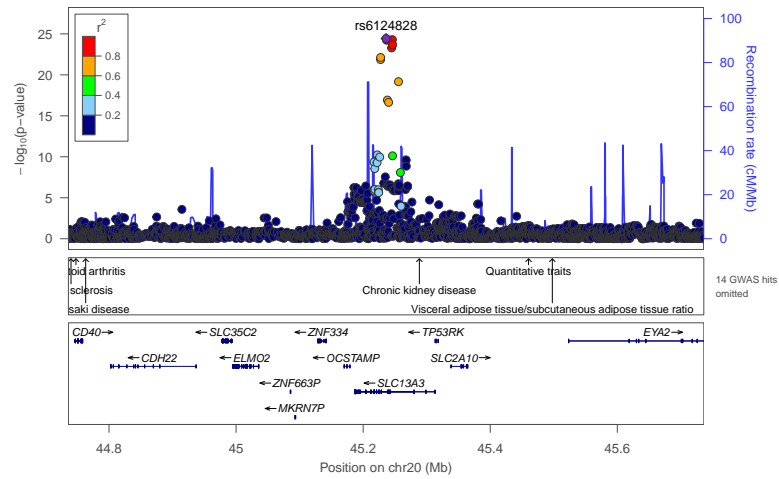

### proline

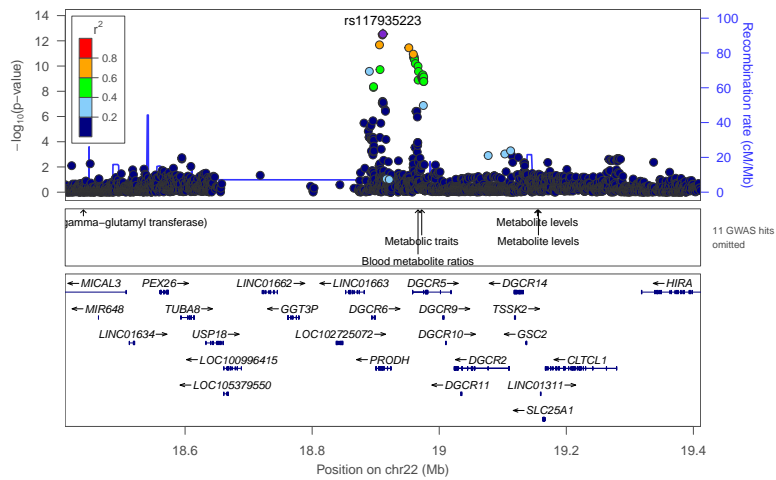

### 3,4-dihydroxyphenylacetate

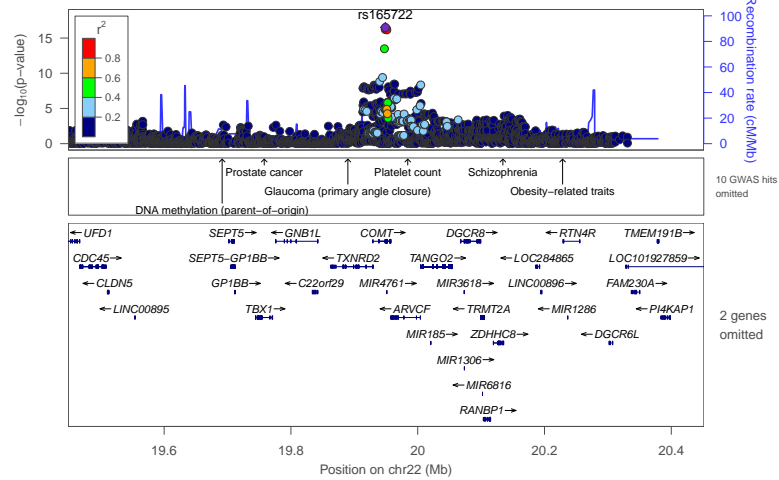

### 2-O-methylascorbic acid

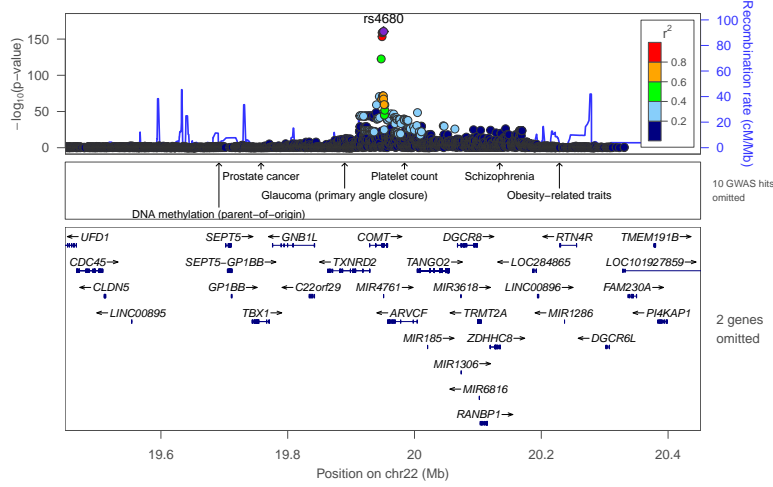

### X - 12707

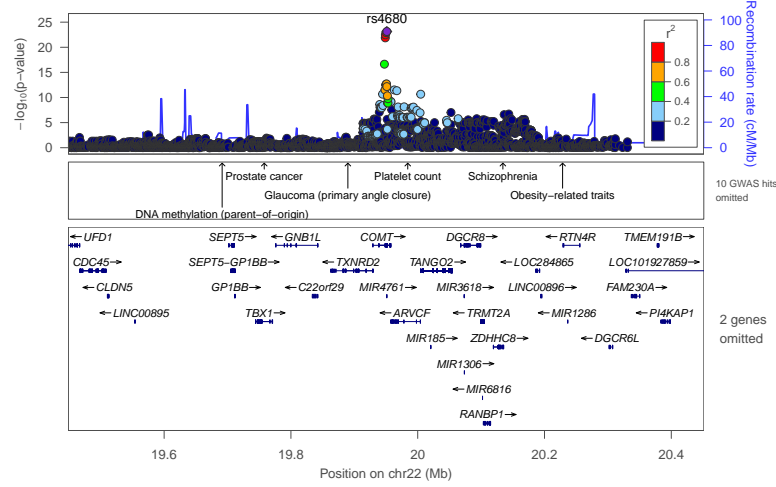

### X - 12708

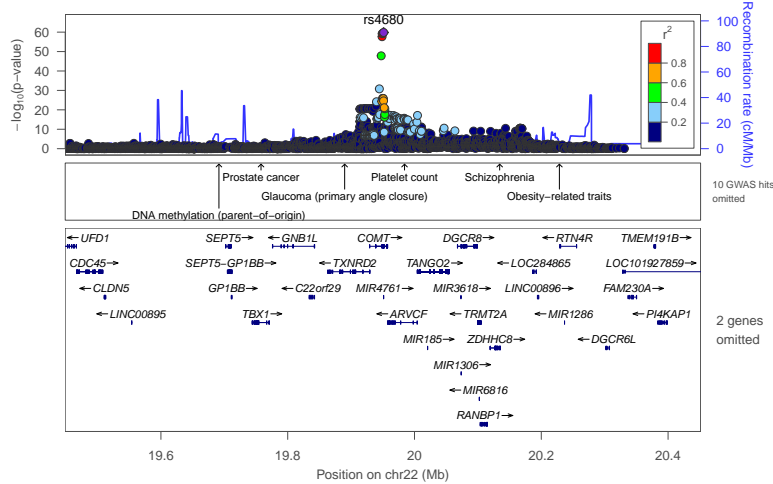

### X - 12713

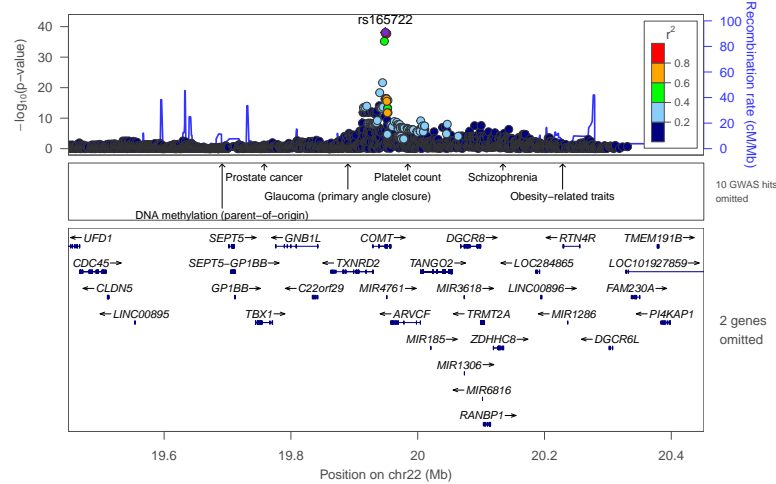

### X - 17342

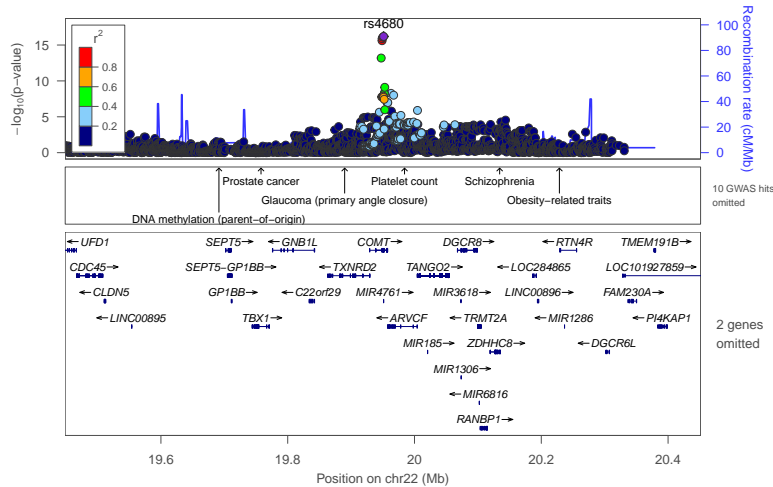

### glucuronide of piperine metabolite C17H21NO3 (3)\*

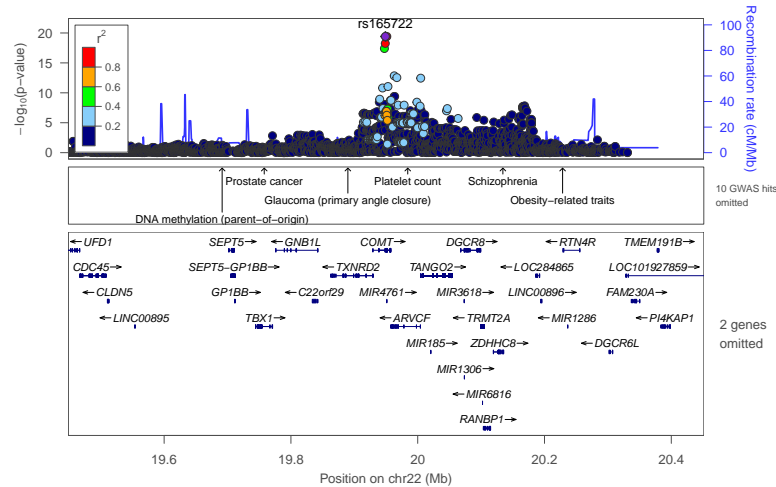

### glucuronide of piperine metabolite C<sub>17</sub>H<sub>21</sub>NO<sub>3</sub> (4)\*

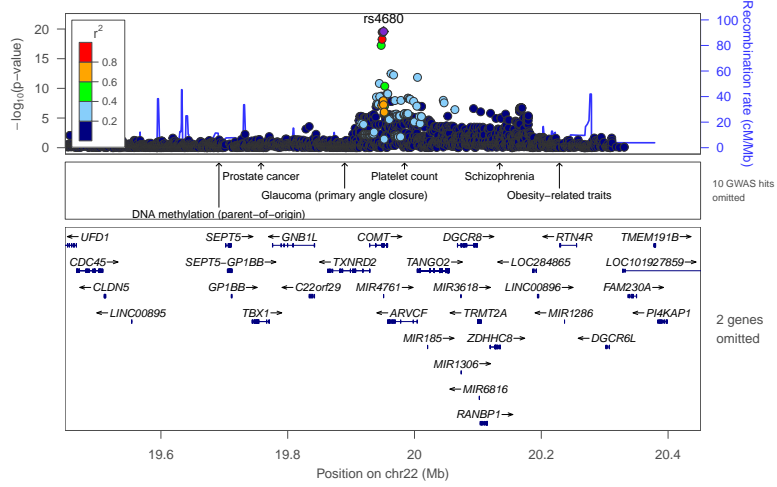

### glucuronide of piperine metabolite C<sub>17</sub>H<sub>21</sub>NO<sub>3</sub> (5)\*

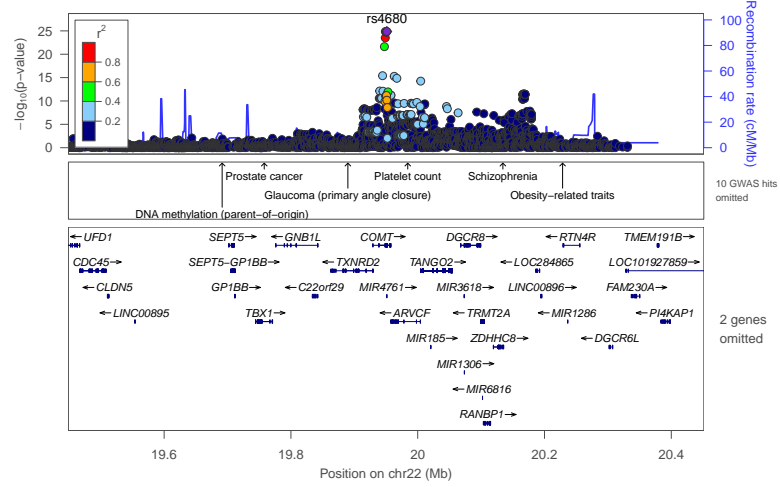

### 3-hydroxyindolin-2-one sulfate

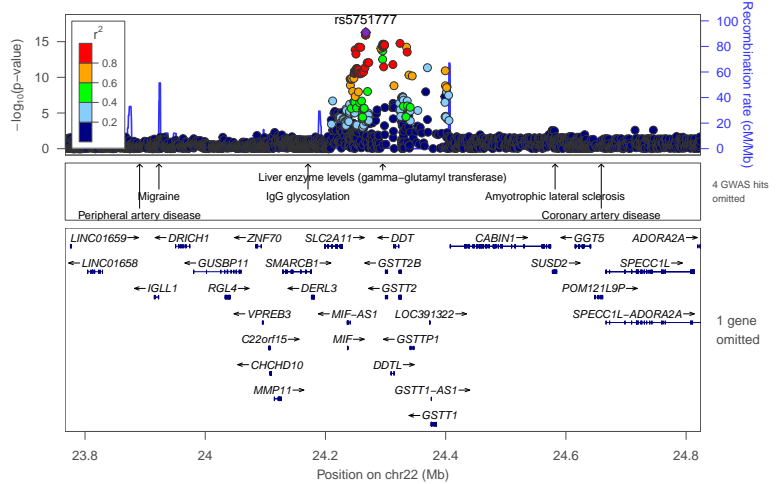

### 3-formylindole

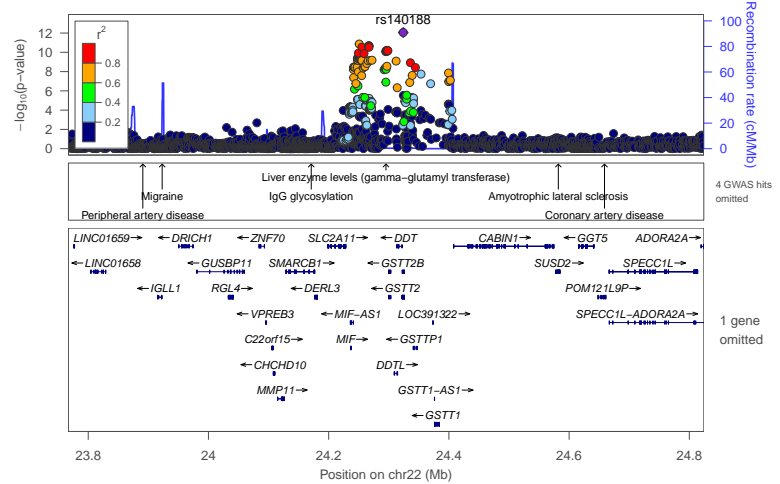

### glycerophosphoethanolamine

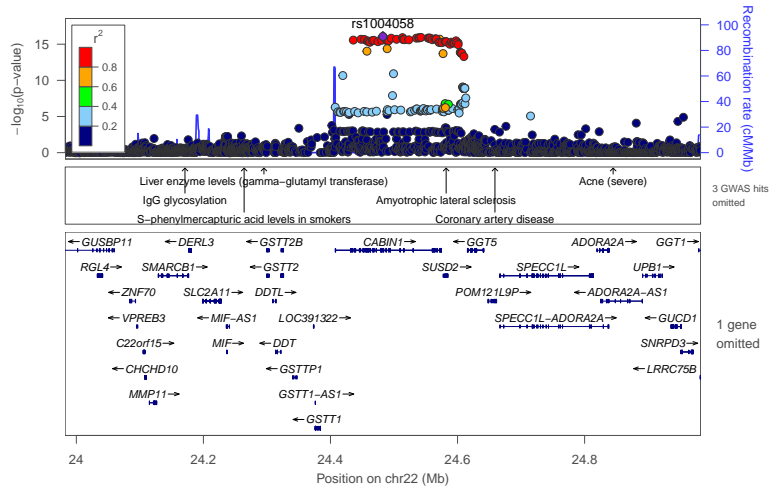

### glycerophosphoserine\*

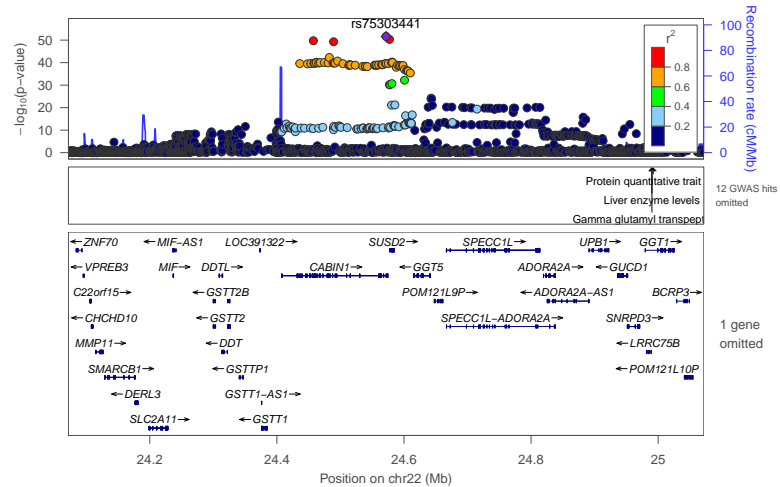

### 3-ureidopropionate

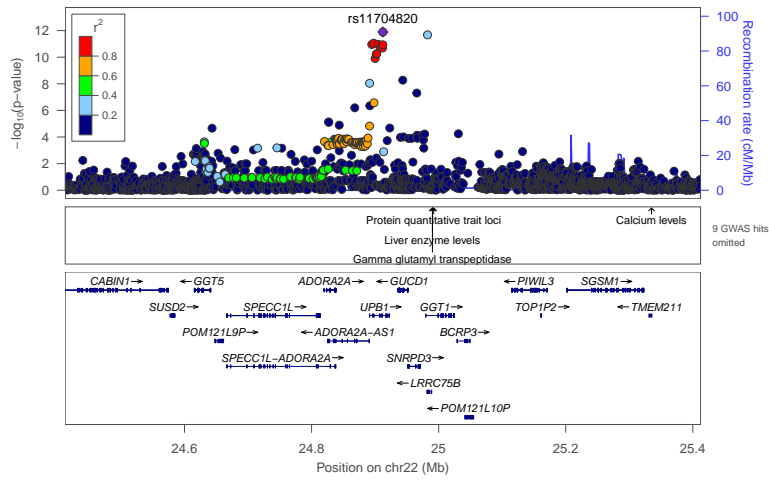

### gamma-glutamylhistidine

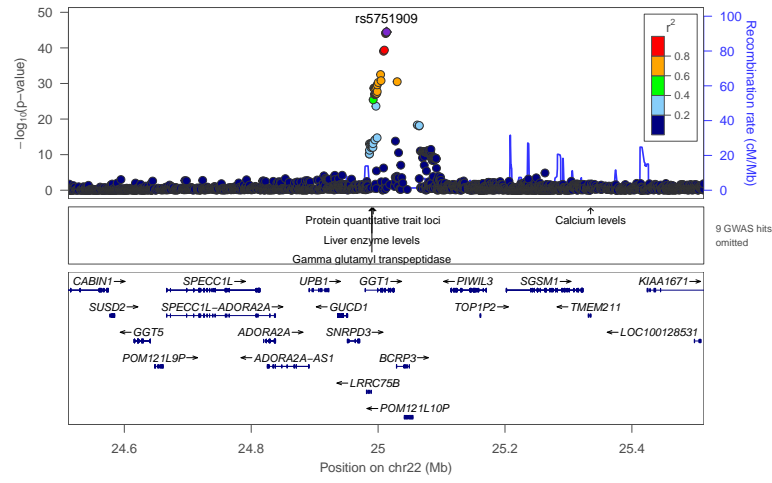

### gamma-glutamylleucine

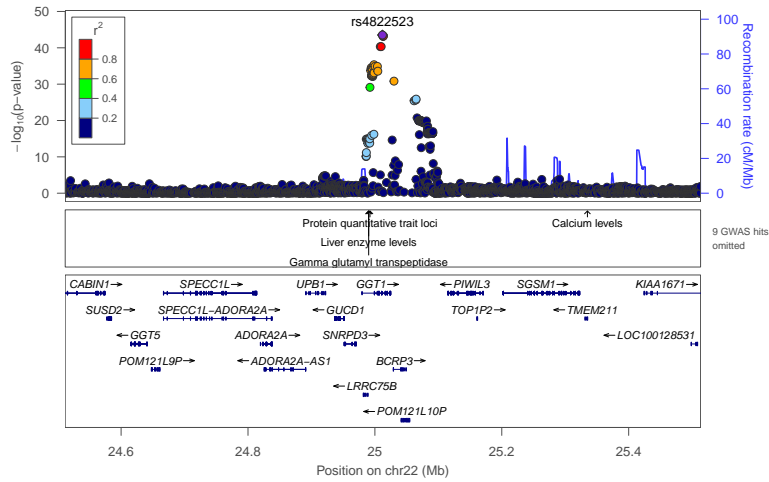

### gamma-glutamyltyrosine

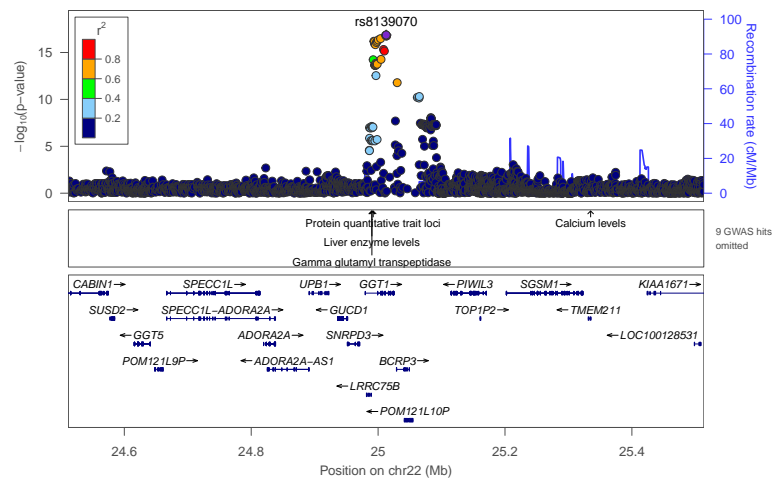

### gamma-glutamylthreonine

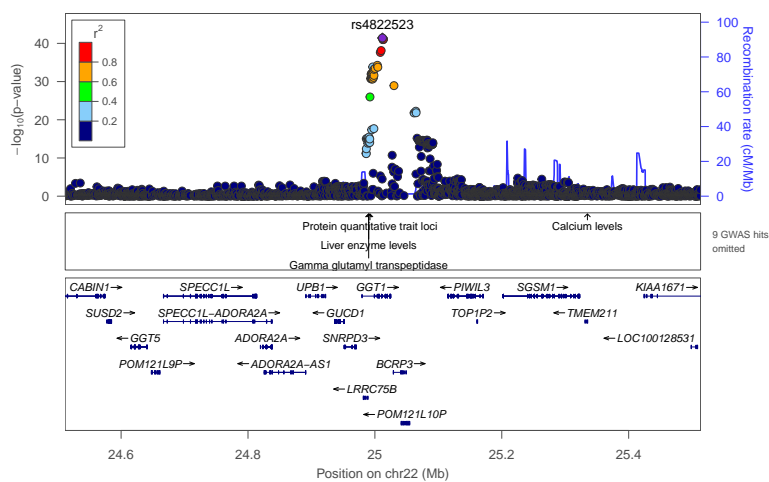

### gamma-glutamylphenylalanine

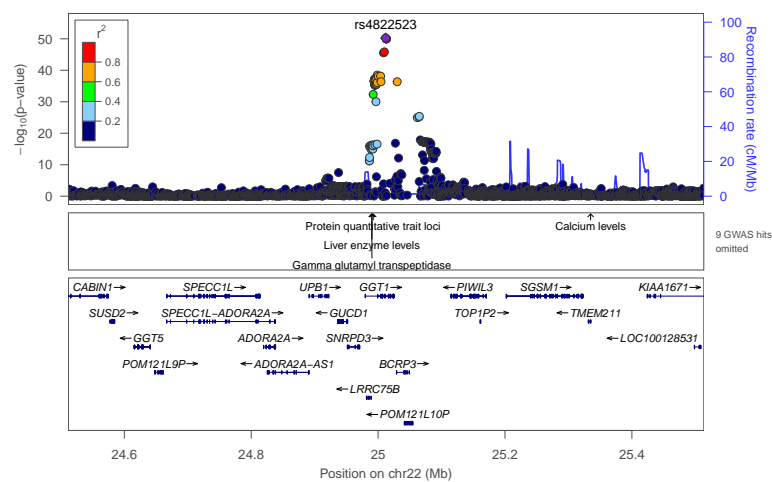



### gamma-glutamyl-epsilon-lysine

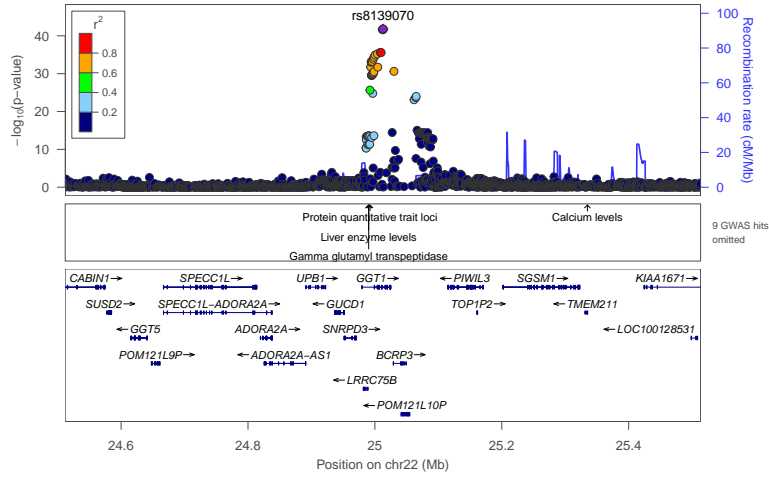

### gamma-glutamylglycine

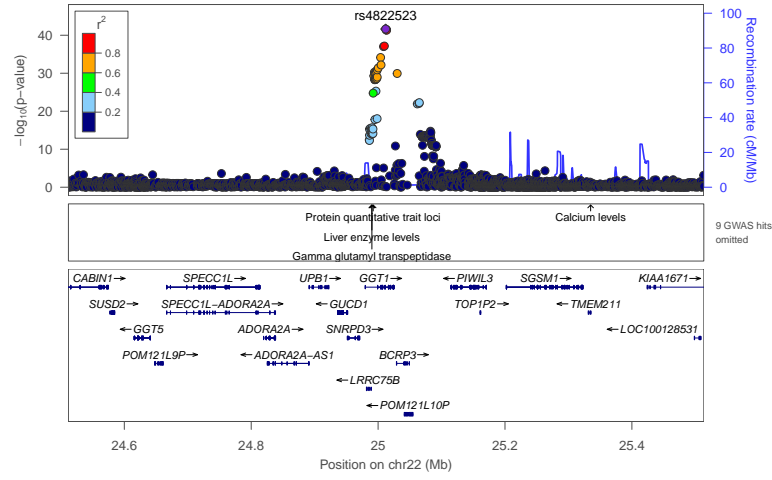

### gamma-glutamylisoleucine\*

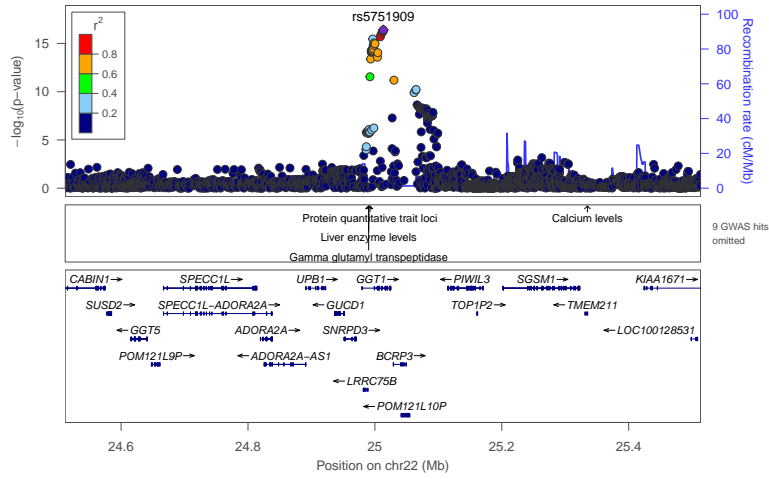

### gamma-glutamylvaline

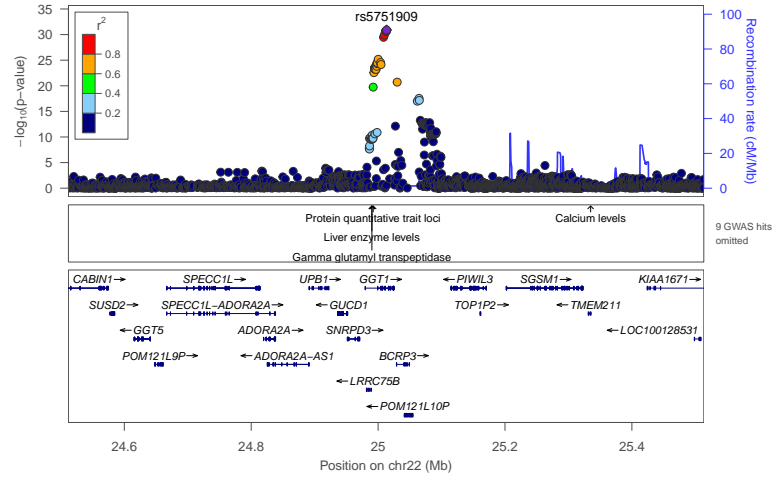

### alpha-hydroxymetoprolol

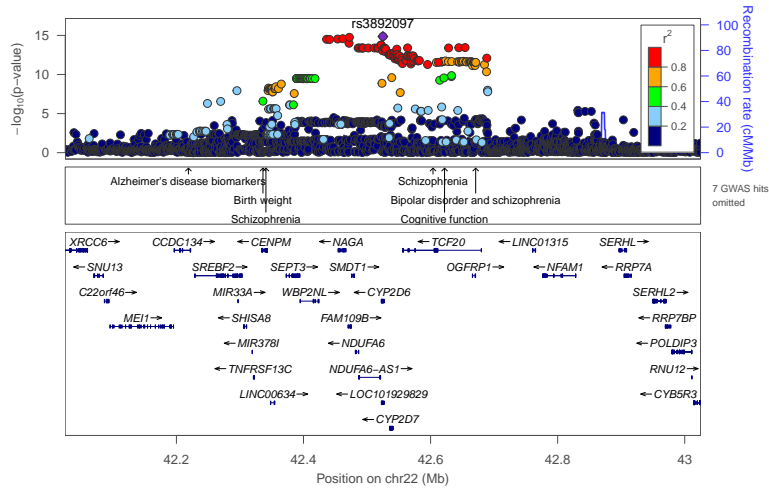

### X - 22162

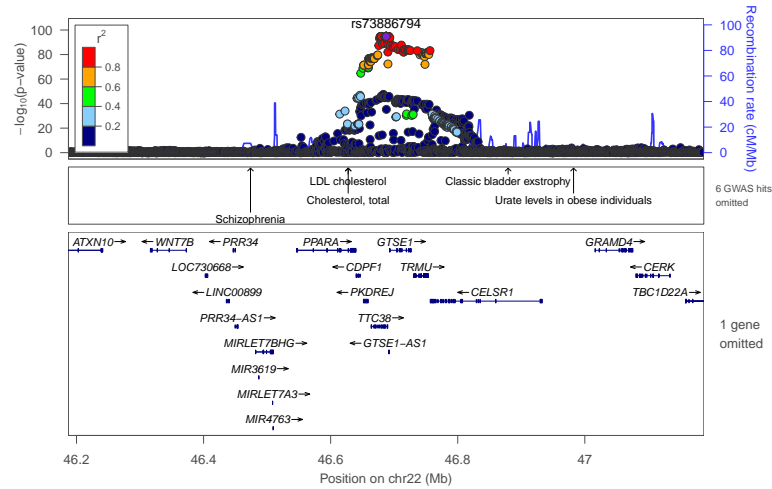

(N(1) + N(8))-acetylspermidine

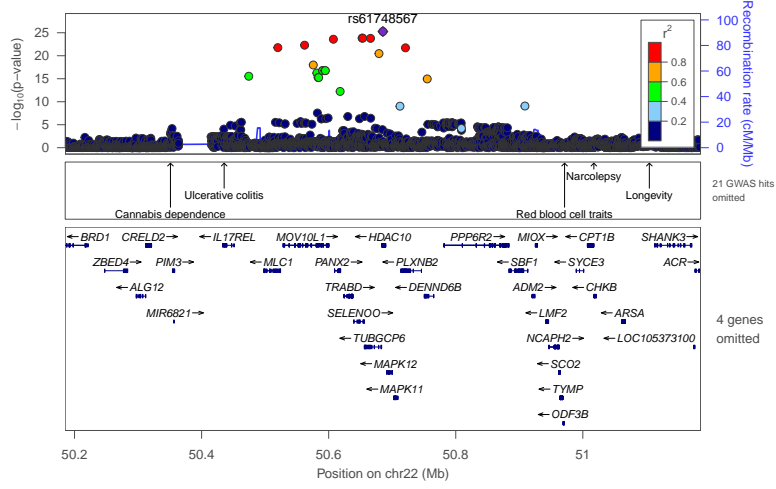

diacetylspermidine\*

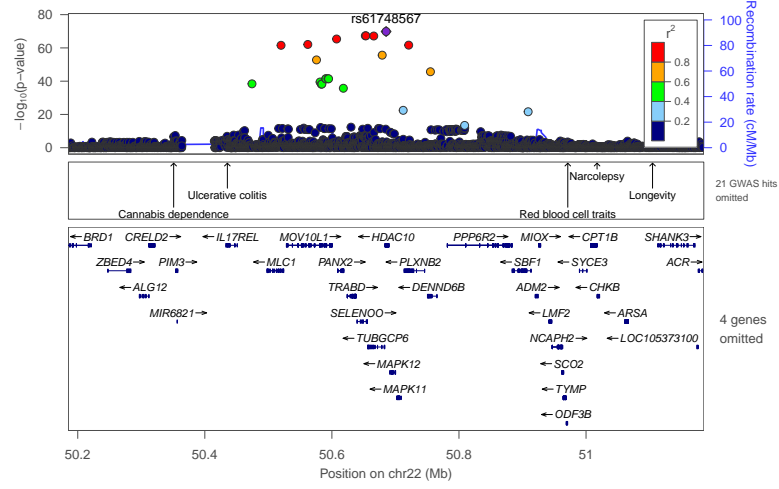

thymine

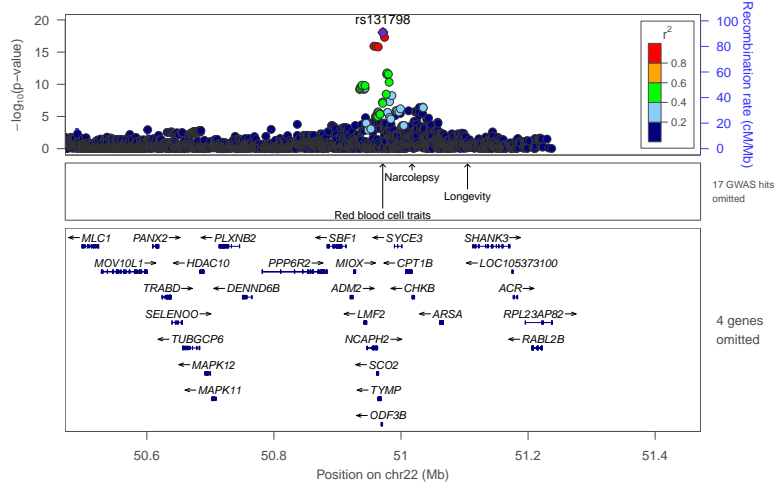

O-sulfo-L-tyrosine

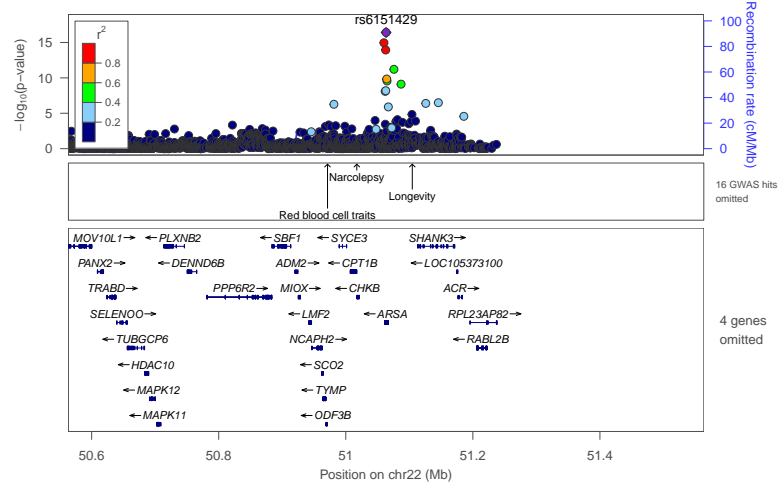

Supplement: 41588_2023_1409_MOESM5_ESM.pdf [file 41588_2023_1409_MOESM5_ESM.pdf]
